# Supplementary material for: Epstein-Barr virus nuclear antigen 2 (EBNA2) extensively rewires the human chromatin landscape at autoimmune risk loci
Source: bioRxiv preprint, doi:10.1101/2020.04.15.043612, version 2 (2021-01-27)
Supplement: Supplemental Table S1 [file 043612_file13.xlsx]

## Sheet: README
Epstein-Barr virus nuclear antigen 2 (EBNA2) extensively rewires the human chromatin landscape at autoimmune risk loci
This document contains differential gene expression information by EBNA2 in Ramos B cells.
Comments, additions, or subtractions should be addressed to the corresponding authors:
Leah Kottyan (Leah.Kottyan@cchmc.org)
Matt Weirauch (Matthew.Weirauch@cchmc.org)
The first tab contains the deseq2 results for EBNA2+ vs uninfected conditions with Fragment per kilobase Million (FPKM) information
The second tab contains the deseq2 results for EBNA2- vs uninfected conditions with Fragment per kilobase Million (FPKM) information
The third tab contains lists of gene that are differentially expressed by EBNA2, and their direction in this study (up/down) and a related study (up/down)
The fourth tab contains lists of gene that are differentially expressed by EBV but not by EBNA2, and their direction in this study (up/down) and a related study (up/down)
The columns in the 'Deseq with FPKM' tabs:
Gene	Gene name.
log2foldChange	log2 of fold change.
adjusted p-value	adjusted p-value using Benjamin-Hochberg correction.
FPKM (EBNA2+ Rep1)	FPKM for EBNA2+ replicate 1.
FPKM (EBNA2+ Rep2)	FPKM for EBNA2+ replicate 2.
FPKM (Uninfected Rep1)	FPKM for uninfected replicate 1.
FPKM (Uninfected Rep2)	FPKM for uninfected replicate 2.

## Sheet: EBNA2+ Deseq with FPKM
Gene	log2foldChange	adjusted p-value	FPKM (EBNA2+ Rep1)	FPKM (EBNA2+ Rep2)	FPKM (Uninfected Rep1)	FPKM (Uninfected Rep2)
A1BG	0.402226	7.71945	10.4903	10.8576	7.94763	8.17065
A1BG-AS1	-0.0246339	0.033588	1.88236	1.78458	1.87194	1.84989
A1CF	-1.04601	0.277121	0.000845999	0.000836818	0.00152666	0.00193973
A2M	0.0653414	0.0269618	0.0246524	0.0164598	0.022879	0.0163291
A2M-AS1	-0.260099	0.0789757	0.0228299	0.0208451	0.0235418	0.0286332
A2ML1	0.19782	0.0603799	0.0184847	0.0235081	0.0176995	0.0188365
A4GALT	0.0087658	0.0658336	19.4469	19.2903	19.0664	19.3511
AAAS	0.130266	4.32418	24.7185	24.0658	22.3312	22.1432
AACS	-0.137422	3.83512	6.46388	6.36451	6.98156	7.09755
AAED1	0.241683	2.38536	12.0407	12.4785	10.5979	10.0958
AAGAB	0.105958	2.41507	8.36057	8.03604	7.7331	7.46924
AAK1	-0.0642175	0.0304934	0.0251555	0.0221178	0.0288221	0.0205074
AAMDC	0.116974	0.311541	1.27711	1.27599	1.18418	1.16498
AAMP	0.0463603	0.654625	25.4997	25.2584	24.0472	24.9957
AANAT	-0.0199966	0.0182145	0.52765	0.457416	0.476853	0.519568
AAR2	-0.0466868	0.296644	6.86956	6.76364	7.27294	6.77874
AARD	2.9555	0.85017	0.046595	0.0592577	0	0.0135663
AARS	0.137687	23.0033	120.13	119.233	107.835	109.259
AARS2	-0.00496371	0.0264654	11.7952	11.5759	11.7952	11.6054
AASDH	0.189485	3.38893	1.00155	1.04586	0.906751	0.884846
AASDHPPT	-0.0297946	0.412734	40.317	40.1263	41.3597	40.5842
AASS	0.667164	0.158763	0.0182787	0.0180804	0.00418859	0.0186266
AATBC	-0.16626	0.27448	0.547763	0.529039	0.67408	0.531859
AATF	-0.0586183	1.44393	57.122	56.7448	58.7248	59.6017
ABALON	0.166093	0.274637	1.28615	1.38336	1.15243	1.22156
ABAT	-0.636981	9.84462	0.468466	0.430284	0.707759	0.686733
ABCA1	-0.173671	6.42202	6.49539	6.3496	7.32706	7.1296
ABCA10	-0.394536	0.125014	0.0245392	0.0168043	0.0311438	0.0230827
ABCA11P	-0.0347484	0.0821146	5.22202	5.09085	5.57901	4.96324
ABCA12	-1.65857	1.5952	0.00362432	0.00448123	0.0126135	0.0129266
ABCA13	-2.32892	1.4983	0.00208067	0.00274412	0.0150188	0.00918784
ABCA17P	-0.0951028	0.0988662	0.46407	0.357652	0.449182	0.426483
ABCA2	-1.21739	18.4782	0.164178	0.181971	0.409639	0.393611
ABCA3	1.27016	12.9693	0.641507	0.622067	0.260144	0.262588
ABCA5	-0.844986	20.2479	0.431224	0.476646	0.842754	0.784699
ABCA6	-0.299718	11.6465	7.39792	7.26848	9.08443	8.92908
ABCA7	-0.0188773	0.143804	10.0879	10.2855	10.2723	10.3246
ABCA8	-0.786335	0.177976	0.00136198	0.00471519	0.00491555	0.0055516
ABCA9	-1.70308	1.22966	0.015171	0.00937895	0.0410655	0.0386493
ABCB1	0.0211044	0.00462154	0.00584116	0.00770369	0.00870031	0.00462959
ABCB10	-0.0821176	0.968901	11.4797	11.682	12.5352	11.9311
ABCB4	2.83712	81.2395	0.795868	0.754095	0.102585	0.11379
ABCB5	-1.13943	0.303779	0.00173511	0.00514883	0.0107353	0.00442033
ABCB6	0.138712	1.37728	3.94899	3.95975	3.61253	3.55566
ABCB7	-0.102612	1.97987	4.86029	4.79851	5.13015	5.21767
ABCB8	0.114783	1.847	2.66517	2.58243	2.45909	2.37666
ABCB9	0.123966	0.340339	0.383593	0.411689	0.354717	0.373486
ABCC1	0.0335774	0.505585	18.9107	18.4339	18.2274	18.1776
ABCC10	-0.00652297	0.0208523	1.52687	1.41106	1.43723	1.50725
ABCC12	0.273547	0.0406665	0.0138647	0.00914279	0.014297	0.00470951
ABCC2	0.0403711	0.0238837	0.179859	0.121497	0.149278	0.14305
ABCC3	-1.04856	0.35031	0.010167	0.00838057	0.0262101	0.0120873
ABCC4	0.029	0.334364	6.13755	6.10605	6.12056	5.85369
ABCC5	-0.0994016	0.897751	1.96768	2.15772	2.15662	2.25348
ABCC5-AS1	0.351496	0.184889	0.713524	0.857019	0.709494	0.51936
ABCC6	-0.487375	0.249947	0.0197513	0.00976846	0.0203671	0.0209013
ABCC8	0.329251	0.0599225	0.00200694	0.00317626	0.00248342	0.00163611
ABCC9	0.0644414	0.00907297	0.00459633	0.00727432	0.00853136	0.00281029
ABCD1	0.0667318	0.130855	1.4462	1.45301	1.43767	1.3247
ABCD2	1.41364	12.7595	0.64599	0.65881	0.254968	0.233805
ABCD3	0.109487	3.7674	22.482	22.2071	20.5408	20.7907
ABCD4	-0.0743364	0.53736	4.38387	4.42417	4.72767	4.52635
ABCE1	-0.0961695	9.88629	40.3929	41.2517	43.3757	43.7069
ABCF1	-0.174411	15.8794	3.19832	3.16783	3.59289	3.57561
ABCF2	-0.111649	7.19009	27.6132	28.0141	30.4746	29.5001
ABCF3	0.131224	4.39226	8.29258	8.41394	7.53689	7.68359
ABCG1	-0.490483	8.79992	0.625598	0.626683	0.916691	0.838964
ABHD1	0.114186	0.2291	2.80143	2.95903	2.57348	2.73685
ABHD10	-0.155409	2.27382	2.89181	3.10158	3.30173	3.359
ABHD11	-0.00998844	0.0288388	1.61038	1.64034	1.7018	1.56468
ABHD11-AS1	-0.16101	0.124822	1.6458	1.70307	1.69712	2.03835
ABHD12	0.047118	0.269043	7.38113	7.43014	7.15621	7.14791
ABHD12B	-3.95369	4.09481	0.00502224	0.00496773	0.0776825	0.0767674
ABHD13	0.0781719	0.394074	3.31606	3.42635	3.1191	3.2536
ABHD14A	0.250168	1.42282	7.2241	7.49712	6.38357	5.96827
ABHD14B	0.489266	24.3747	5.92597	5.96375	4.25	4.20174
ABHD15	-0.319031	7.84028	7.1718	7.32167	8.77589	9.2644
ABHD16A	0.00819405	0.0272516	0.411059	0.400702	0.395052	0.410295
ABHD16B	-0.0112557	0.0183843	3.59932	4.2154	3.9875	3.87235
ABHD17A	0.143378	2.80154	14.0081	13.892	12.4927	12.7121
ABHD17B	-0.0123013	0.0923413	17.0425	17.3737	17.2402	17.395
ABHD17C	0.483525	1.43934	0.942147	1.07644	0.696172	0.744446
ABHD18	-0.217853	5.07112	2.26938	2.25597	2.72761	2.52425
ABHD2	0.123721	3.98329	4.92388	4.85069	4.52629	4.42549
ABHD3	0.167938	22.5542	44.2073	44.5664	39.4428	39.4039
ABHD4	0.741418	1.2098	0.341729	0.375578	0.215346	0.212809
ABHD5	-0.0580916	0.108477	0.957274	1.12443	1.12194	1.04098
ABHD6	0.187776	3.20053	6.37655	6.46809	5.57744	5.67486
ABHD8	-0.234	2.87906	9.06151	8.21389	10.2603	10.0117
ABI1	-0.00235761	0.0246533	2.93622	2.93446	2.92782	2.93958
ABI2	0.159244	5.23778	2.1722	2.22311	1.94703	1.98034
ABI3	-0.0330611	0.151718	6.72372	6.29983	6.62314	6.67238
ABI3BP	-0.00348213	0.00228233	0.0459977	0.0325627	0.0358065	0.0427373
ABL1	-0.0334849	0.290393	5.81709	5.95938	5.86141	6.16483
ABL2	-0.492614	27.4667	0.400437	0.428433	0.588393	0.575365
ABLIM1	-0.108492	18.1001	2.31542	2.30169	2.47754	2.48923
ABLIM2	0.537675	0.33932	0.0133258	0.0144993	0.010077	0.00905296
ABR	-0.246595	37.3319	4.58365	4.50307	5.37767	5.3791
ABRA	-0.384028	0.190715	0.0776713	0.119511	0.164636	0.0923412
ABRACL	0.0907548	2.92279	131.514	131.092	122.613	123.44
ABRAXAS1	-0.0447404	0.280703	6.75761	6.73457	7.22834	6.65949
ABRAXAS2	0.0330089	0.245068	17.2971	16.9243	16.8799	16.4945
ABT1	-0.0693823	1.18266	31.1642	31.5536	33.0516	32.6141
ABTB1	-0.0741468	0.0527589	0.149754	0.182158	0.200333	0.14848
ABTB2	-0.195183	0.347737	0.442338	0.449558	0.498736	0.520105
ACAA1	0.102737	1.02251	5.83053	6.05918	5.58951	5.45938
ACAA2	-0.184644	14.9388	67.6336	68.3954	77.8445	76.4243
ACACA	-0.144296	15.5228	4.35564	4.35985	4.83156	4.7798
ACACB	-0.0163677	0.0547664	2.29186	2.16354	2.25281	2.24338
ACAD10	-0.0464736	0.260713	3.3576	3.34006	3.46987	3.43199
ACAD8	-0.0728146	0.477052	11.6636	12.5722	12.866	12.5708
ACAD9	-0.0400981	0.411845	12.7416	13.2694	13.4421	13.2449
ACADL	-0.562614	0.0889998	0.0239513	0.00947657	0.0395171	0.00976289
ACADM	0.0613002	3.43492	21.1509	21.0984	20.1753	20.2277
ACADS	0.339814	2.92377	2.6167	2.91678	2.27658	2.08683
ACADSB	0.052582	0.233304	1.60253	1.64007	1.5567	1.56306
ACADVL	0.197601	5.34646	5.41174	5.54545	4.69129	4.84231
ACAP1	0.0777414	1.48299	30.3421	30.868	29.0716	28.8022
ACAP2	0.0286004	0.839705	42.0405	43.0157	41.5163	41.6893
ACAP3	0.095374	1.20398	11.1375	11.4034	10.4323	10.6205
ACAT1	0.0276604	0.238946	34.1087	35.0172	34.4624	33.2067
ACAT2	0.00736551	0.0638384	37.0513	36.5482	36.627	36.4371
ACBD3	0.0695533	1.63979	29.0517	29.595	27.9195	27.8458
ACBD3-AS1	-0.507259	0.490338	1.10906	0.963242	1.39469	1.54365
ACBD4	-0.143986	0.686064	0.801653	0.768583	0.899933	0.831395
ACBD5	-0.0812586	1.21814	0.498955	0.514739	0.53447	0.53564
ACBD6	0.0578485	0.775273	41.1418	41.2797	39.4395	39.5694
ACBD7	-0.173108	2.13511	6.74897	6.51869	7.60332	7.32321
ACD	-0.181264	2.90369	4.35517	4.35793	4.94427	4.91378
ACE	0.414755	12.4625	2.49521	2.44738	1.8408	1.85867
ACER2	0.149652	0.163696	0.500706	0.602581	0.529226	0.463464
ACER3	0.0440096	0.230399	0.984301	0.958825	0.911617	0.968846
ACHE	0.132713	0.0400732	0.023271	0.0230185	0.0254082	0.0167393
ACIN1	-0.100474	9.12431	13.2822	13.4001	14.2665	14.278
ACKR3	4.41	2.809	0.101883	0.145568	0.0116734	0
ACKR4	0.0375387	0.193159	5.93263	6.21273	5.86725	5.94058
ACLY	0.0115874	0.350691	34.6323	34.3326	34.075	34.1879
ACMSD	-0.443724	0.285872	0.102977	0.175938	0.144801	0.233722
ACO1	0.47726	16.2999	4.19669	4.39184	3.16403	2.99258
ACO2	0.0565697	1.27771	43.1044	43.1844	41.1746	41.6139
ACOT1	0.296009	0.609583	1.56603	1.33613	1.16331	1.19498
ACOT12	0.387376	0.0987419	0.0360945	0.101158	0.0434232	0.0613024
ACOT13	-0.0760837	0.780916	4.4619	4.56566	4.73227	4.76347
ACOT2	0.137088	0.688615	3.51828	3.67616	3.39439	3.13438
ACOT7	0.085822	1.16603	7.95543	7.83708	7.36331	7.48414
ACOT8	0.220773	1.91135	13.3531	12.3512	11.3309	10.6781
ACOT9	0.298005	4.8454	2.83881	3.04187	2.32184	2.45086
ACOX1	0.173848	3.6657	1.79704	1.82732	1.59675	1.60914
ACOX2	-0.853516	0.248992	0.0465892	0.0153612	0.0747319	0.0369258
ACOX3	0.0548751	0.211055	2.68846	2.8091	2.64213	2.63888
ACOXL	-0.934683	1.71053	0.24204	0.164596	0.37958	0.395662
ACOXL-AS1	-0.600538	0.302095	0.0481222	0.0622461	0.0916111	0.0754433
ACP1	0.00502736	0.0470453	27.7026	27.8724	27.6752	27.5859
ACP2	0.0678319	0.175961	0.758573	0.775466	0.717933	0.74242
ACP5	-0.328616	8.08449	2.81764	2.80346	3.49623	3.54722
ACP6	-0.0234424	0.169007	4.1203	4.06481	4.10626	4.19446
ACPP	2.96082	9.6392	0.131361	0.125605	0.0210711	0.0118988
ACPT	0.0120221	0.0189018	4.79981	5.26645	5.34359	4.61943
ACRBP	-0.595654	1.53414	0.62667	0.569778	0.907305	0.896617
ACRV1	-0.159387	0.0830656	0.388385	0.34824	0.29677	0.523906
ACSBG1	-0.269109	0.146552	0.0661955	0.0535722	0.0786019	0.0654113
ACSBG2	-0.22955	0.312022	0.0917476	0.0813137	0.108232	0.0942418
ACSF2	0.401531	5.01958	0.891473	0.887779	0.653822	0.690133
ACSF3	0.0272029	0.555612	7.0954	7.02222	6.94043	6.8832
ACSL1	0.0950434	3.04059	5.43682	5.44296	5.08208	5.0818
ACSL3	0.00652692	0.0575918	14.8528	15.1652	14.9064	14.9113
ACSL4	-0.0940326	5.45492	8.67763	8.64541	9.19764	9.25147
ACSL5	0.108669	3.86475	10.8554	11.1047	10.2315	10.0914
ACSL6	-2.04759	0.630015	0.000613002	0.000606349	0.00284452	0.00218634
ACSM3	0.746574	4.27967	0.887645	1.0153	0.59912	0.532856
ACSM6	-1.28012	0.591206	0.0488399	0.0483099	0.0503628	0.184858
ACSS1	0.366854	26.1448	5.82463	5.60896	4.43908	4.40779
ACSS2	-0.342316	8.36142	2.59451	2.53965	3.34635	3.14873
ACTA1	0.880839	0.801731	0.335861	0.268937	0.131936	0.195573
ACTA2	0.113309	0.0959658	0.273528	0.219373	0.21599	0.238557
ACTA2-AS1	-0.251577	0.381683	0.763315	0.680104	0.88926	0.825345
ACTB	-0.072582	27.2874	880.235	873.356	921.791	918.243
ACTG1	-0.120152	56.5834	193.092	191.827	208.341	209.09
ACTG1P17	-0.249257	0.262792	0.511298	0.633967	0.712889	0.645783
ACTG1P20	-0.0240804	0.0418705	2.401	2.24201	2.27724	2.433
ACTG1P4	0.288362	0.0856903	0.107846	0.0651908	0.0803176	0.061055
ACTL10	0.263984	1.74144	4.52272	4.32297	3.63071	3.71928
ACTL6A	-0.0015463	0.0149995	38.3311	38.4415	38.0717	38.6142
ACTL6B	-0.176937	0.0286412	0.0116766	0.0307996	0.0321084	0.0158651
ACTL7A	0.468244	0.118963	0.0933209	0.0615387	0.0641538	0.0475485
ACTL8	-1.46105	0.79202	0.0383479	0.0379318	0.0922685	0.117233
ACTN1	-1.50559	0.550251	0.00638331	0.00210468	0.0153588	0.00867307
ACTN2	0.102232	0.0133058	0.00159708	0.00631898	0.00329375	0.00406869
ACTN3	-1.37333	0.350435	0.00266796	0.00527801	0.0151313	0.00543747
ACTN4	-0.0170414	0.33238	34.1158	34.1363	34.8141	34.0997
ACTR10	0.0690084	1.07494	28.1079	28.1754	26.498	27.0381
ACTR1A	-0.0125538	0.129633	47.019	46.0121	47.0903	46.5482
ACTR1B	0.0752444	1.51272	37.8554	37.3192	35.1992	35.9963
ACTR2	-0.0244047	1.11494	63.7059	64.2176	64.9769	64.8458
ACTR3	-0.059775	5.66208	29.6795	30.0377	30.8501	31.257
ACTR3B	-0.193635	2.37995	0.647023	0.615528	0.729819	0.710908
ACTR3C	-0.62452	11.4788	0.0666746	0.0652877	0.104118	0.0988893
ACTR5	0.0204274	0.100981	14.2501	14.3142	14.0945	14.0069
ACTR6	0.045704	0.354983	7.0697	7.32798	6.96883	6.94985
ACTR8	-0.0693748	1.01898	16.7204	16.6201	17.5669	17.3399
ACTRT3	-0.185954	0.341963	1.24626	1.13881	1.34632	1.36069
ACVR1	-0.303638	0.212767	0.0212877	0.022764	0.0266977	0.0275558
ACVR1B	0.0611909	0.302264	1.459	1.4936	1.43408	1.38988
ACVR2A	-0.783203	4.62955	0.116112	0.130513	0.213808	0.209752
ACVR2B	-0.258511	5.71345	2.73727	2.8554	3.48435	3.19195
ACVR2B-AS1	-0.523311	0.338706	0.0991557	0.116761	0.146068	0.163593
ACVRL1	-1.04906	0.190343	0.00283753	0.00421011	0.00877803	0.00578308
ACY1	0.459518	0.666681	0.169013	0.149106	0.0910668	0.139646
ACY3	-0.833945	68.9551	18.9523	18.6103	33.4757	33.3342
ACYP1	-0.0276683	0.104636	5.29183	5.15716	5.37631	5.25177
ACYP2	-0.388518	7.57798	1.85936	1.84509	2.44445	2.39433
ADA	0.111474	4.48251	24.3645	23.4469	22.425	21.7347
ADA2	0.072074	0.505345	1.0793	1.07036	1.02675	1.0137
ADAL	-0.136577	1.5837	1.36567	1.41225	1.52836	1.51883
ADAM10	0.160398	10.5723	13.701	13.6078	12.1111	12.2703
ADAM11	-0.1975	0.213968	0.172964	0.118959	0.179751	0.154224
ADAM12	0.146438	0.0178412	0.00271845	0.000896315	0.00233601	0.000923396
ADAM15	0.0471606	0.688955	2.56815	2.53241	2.44886	2.47675
ADAM17	0.0776263	4.78485	55.1829	55.5481	52.2631	52.4381
ADAM19	-0.179895	20.4656	28.1709	28.6036	32.2038	31.9714
ADAM1A	-0.263297	1.84869	3.07857	2.79691	3.48511	3.55062
ADAM2	2.29664	2.68742	0.0570176	0.0442045	0.0143016	0.00628139
ADAM20	0.0635177	0.0187597	0.0595882	0.109463	0.0877803	0.0737343
ADAM20P1	0.509171	0.158136	0.031312	0.0774305	0.0443964	0.031908
ADAM21	0.0315409	0.00996396	0.0892192	0.158852	0.110401	0.13183
ADAM21P1	-1.98431	0.85134	0.0231935	0.0114709	0.0717501	0.0649961
ADAM22	-0.0687508	0.678858	0.492372	0.492824	0.511047	0.519956
ADAM23	-0.550306	52.8502	7.56679	7.55668	10.9376	11.1602
ADAM28	-0.501524	0.815156	0.0396765	0.0299016	0.0457843	0.0524649
ADAM29	0.387724	0.104636	0.00472692	0.00727319	0.00487431	0.00428168
ADAM32	2.95012	45.3367	1.05177	0.9232	0.131907	0.123111
ADAM8	-0.690099	7.54118	0.473841	0.463699	0.793511	0.715919
ADAM9	0.0736278	1.53757	5.46285	5.45906	5.14408	5.21156
ADAMDEC1	-0.0482453	0.00594608	0.0102181	0.00336905	0.0122928	0.00173542
ADAMTS12	-0.0438408	0.00585792	0.0025786	0.00255061	0.0013295	0.00394151
ADAMTS13	0.372066	0.942742	0.139965	0.133696	0.104002	0.106972
ADAMTS20	-0.214441	0.0297677	0.0117054	0.00385944	0.0100586	0.00795209
ADAMTS4	-0.975411	0.286634	0.00557581	0.00827294	0.017249	0.00994338
ADAMTS6	0.0856936	0.622755	1.82619	1.80079	1.7592	1.65135
ADAMTS7	1.60934	0.820559	0.019439	0.0619571	0.0222724	0.004402
ADAMTS9	-0.42317	0.0777757	0.00328472	0.00487361	0.00254035	0.00836809
ADAMTSL2	0.832285	0.583267	0.0428703	0.0439195	0.0221035	0.0265238
ADAMTSL3	-1.13736	2.33113	0.0269073	0.0290348	0.0538109	0.068964
ADAMTSL4	0.11364	0.0884718	0.0746621	0.0633015	0.0534217	0.073754
ADAMTSL4-AS1	-0.0396102	0.0428339	2.09425	2.33331	2.2782	2.26309
ADAMTSL5	-0.722019	0.327093	0.0793063	0.0247723	0.0860833	0.0850692
ADAP1	1.17026	1.18699	0.0457635	0.0342262	0.0161138	0.0193363
ADAP2	0.157546	0.0524879	0.0175304	0.0156061	0.0135577	0.0160776
ADAR	0.0689053	6.76713	13.3167	13.1843	12.6193	12.5903
ADARB1	0.715736	14.2428	0.248206	0.262831	0.161521	0.149009
ADAT1	-0.128284	3.05599	1.03256	1.03517	1.12375	1.13131
ADAT2	-0.0171312	0.0848795	2.83859	2.92964	2.86313	2.96117
ADAT3	-0.14995	0.371375	1.38361	1.29198	1.36503	1.5965
ADCK1	-0.0675931	0.128933	1.44135	1.17379	1.3824	1.35185
ADCK2	-0.121475	4.58618	39.098	39.3717	42.365	42.811
ADCK5	0.0912711	0.655652	12.2121	12.0498	11.5813	11.1443
ADCY1	-0.684912	0.701373	0.0209585	0.0315112	0.039766	0.0444234
ADCY10	0.143086	0.0537716	0.0225733	0.0141413	0.016294	0.0168688
ADCY10P1	0.583219	4.01529	1.1337	1.06196	0.767691	0.694762
ADCY3	-0.114073	3.63143	9.40599	9.62947	10.1323	10.4241
ADCY4	0.299045	0.233077	0.0600725	0.0818433	0.070127	0.0450456
ADCY5	-0.321234	0.099844	0.0116849	0.0136596	0.0186216	0.0129898
ADCY7	-0.300827	18.7314	8.15794	7.83714	10.018	9.64254
ADCY9	0.466731	1.20033	0.255477	0.340999	0.223768	0.207017
ADD1	-0.257318	26.0597	5.44241	5.41732	6.43433	6.51719
ADD3	0.00722358	0.0753538	5.21452	5.21808	5.16477	5.19296
ADD3-AS1	-0.13203	0.188122	1.70442	1.64907	1.91123	1.75585
ADGB	-0.749566	0.153797	0.00904251	0.00894438	0.02098	0.00921462
ADGRA2	0.0794208	0.109746	0.45605	0.480393	0.443805	0.440589
ADGRB1	-0.190639	0.150685	0.138233	0.128187	0.158134	0.145266
ADGRB2	1.21078	20.8739	0.701467	0.705912	0.322246	0.284572
ADGRD1	0.152232	1.48075	2.10883	2.21076	1.87363	2.00474
ADGRD1-AS1	0.178402	0.123197	0.539381	0.602369	0.385751	0.620569
ADGRE1	-1.21569	0.679215	0.0065872	0.00651571	0.0127361	0.0176205
ADGRE2	0.638663	0.379231	0.0210094	0.0340059	0.0216645	0.0136241
ADGRE4P	-1.958	0.544826	0.00437227	0.0129745	0.045086	0.0222774
ADGRE5	0.533681	32.9302	4.65354	4.5666	3.20195	3.15333
ADGRF1	0.836329	0.266547	0.0120752	0.0290072	0.00889406	0.0140629
ADGRF3	0.0761465	0.162528	0.23238	0.230346	0.218767	0.219206
ADGRF5	-2.85909	1.09837	0	0.00305572	0.0138042	0.0083948
ADGRG1	1.09348	0.208845	0.00190672	0.00107773	0.000561765	0.000832721
ADGRG2	0.742339	0.265489	0.0055447	0.00301649	0.00114352	0.00395516
ADGRG4	-0.308979	0.0542764	0.00479559	0.00711532	0.00494512	0.00977373
ADGRG5	-0.536981	0.552658	0.0505371	0.0397637	0.0675099	0.0632033
ADGRG6	0.797768	0.205262	0.00302451	0.00470122	0.00311881	0.00132089
ADGRG7	-1.04575	0.220192	0.0065584	0.00648723	0.0112715	0.0155942
ADGRL1	0.633599	17.3565	1.20784	1.16697	0.749492	0.777773
ADGRL3	0.315919	0.0457595	0.00125208	0.00154812	0.000968343	0.00127592
ADGRV1	-0.409675	0.186303	0.00494756	0.00581147	0.00701502	0.00724749
ADH5	0.0802386	3.12967	55.9998	56.2324	52.9349	52.9938
ADH6	1.09348	0.208845	0.012551	0.00709419	0.00369783	0.0054814
ADHFE1	0.996608	1.20908	0.359851	0.312233	0.10416	0.2316
ADI1	-0.057313	0.5558	7.52753	7.50581	7.72393	7.88405
ADIPOQ-AS1	0.539887	0.096084	0.0166458	0.0230511	0.00686591	0.0203551
ADIPOR1	0.133992	4.89627	11.1787	11.3546	10.0684	10.4209
ADIPOR2	-0.024825	0.420146	41.5013	41.9087	42.1423	42.5297
ADK	-0.104317	1.8121	6.24452	6.29596	6.86909	6.583
ADM	1.14094	146.218	34.0903	34.0684	15.6039	15.237
ADM2	-3.0131	10.116	0.0353688	0.0291541	0.249223	0.270315
ADM5	-0.283539	2.57303	4.7838	4.62054	5.52492	5.8957
ADNP	-0.0344616	0.627607	4.44269	4.50465	4.55113	4.59249
ADNP2	0.0147497	0.115223	15.2988	15.0019	14.941	14.9853
ADNP-AS1	-0.132704	0.250653	1.08444	1.1955	1.18655	1.30754
ADO	0.114541	3.58472	24.2605	23.83	22.0568	22.265
ADORA2A	-0.0464483	0.0413412	0.0961659	0.0888274	0.0933312	0.0972757
ADORA2A-AS1	0.0297261	0.0374639	0.67472	0.65041	0.645158	0.650059
ADORA2B	-0.693654	0.436649	0.157662	0.0748563	0.195093	0.179942
ADORA3	-0.699291	0.197374	0.0188523	0.00745909	0.0311042	0.0115267
ADPGK	-0.0437244	0.629613	11.9706	11.7478	12.2776	12.1171
ADPGK-AS1	0.322567	0.711934	0.801252	0.960544	0.678052	0.727752
ADPRH	1.26665	32.7031	1.049	1.10567	0.419887	0.473561
ADPRHL1	-0.036541	0.0466872	0.767903	0.862051	0.867261	0.80115
ADPRHL2	0.105283	1.27087	21.9742	22.8929	20.9443	20.676
ADPRM	-0.175402	0.37201	2.40011	2.33528	2.31319	3.02128
ADRA2B	-0.367519	0.0589783	0.014137	0.0139836	0.0145778	0.0216091
ADRB1	0.122915	0.0488372	0.116219	0.106746	0.111282	0.0930528
ADRB2	-2.30101	5.50283	0.0698192	0.0805717	0.38398	0.35574
ADRM1	0.0669586	2.00675	23.9776	23.7902	22.7776	22.7239
ADSL	0.0761218	3.38113	28.4733	29.0451	26.9825	27.4602
ADSS	-0.0710493	2.04798	43.9022	44.5159	45.8814	46.7962
ADSSL1	0.491348	0.167165	0.034786	0.0344085	0.0358707	0.013293
ADTRP	5.06072	4.08882	0.0781041	0.144856	0	0.00663256
AEBP1	0.081779	0.315607	3.10826	3.03696	2.80754	2.98583
AEBP2	-0.0947053	1.56	3.46803	3.38197	3.63066	3.66786
AEN	-0.0570795	1.20628	35.5375	35.1329	37.161	36.2022
AES	-0.0523601	1.88316	40.5125	40.1053	41.3434	42.0687
AFAP1	1.43166	0.981612	0.0280275	0.0107813	0.00481689	0.0095203
AFAP1-AS1	2.56652	28.8095	0.548995	0.515366	0.102766	0.0766118
AFAP1L1	-0.523875	0.433777	0.0173549	0.0220713	0.0319572	0.024633
AFAP1L2	0.186528	1.39624	0.171256	0.183148	0.152958	0.157787
AFDN	-0.461228	41.4268	2.48853	2.41142	3.33822	3.39254
AFF1	0.185798	4.17137	1.17524	1.22703	1.06015	1.04733
AFF1-AS1	0.751837	4.53587	1.73051	1.88713	1.07825	1.06554
AFF2	-0.18462	18.845	2.16775	2.11257	2.43986	2.41412
AFF3	-0.0633912	1.66267	7.5277	7.64674	7.98225	7.8397
AFF4	0.0141889	0.108716	8.90724	9.25663	8.90827	9.03879
AFG1L	0.203577	1.0399	0.594536	0.619036	0.503536	0.547952
AFG3L1P	-0.212545	4.16723	3.56074	3.54411	4.17817	4.03672
AFG3L2	-0.07486	2.94532	48.8396	48.2765	50.7768	51.2856
AFMID	0.0299705	0.142428	6.92154	6.85508	6.71345	6.75023
AFTPH	0.0641796	2.13908	13.4347	13.1702	12.7164	12.675
AGA	0.0644575	0.371418	4.00452	4.22361	4.02228	3.82986
AGAP1	-0.0507411	0.00596881	0.00100377	0.00347506	0.00258766	0.00204575
AGAP11	-1.21602	0.370229	0.015113	0.014949	0.0311686	0.0385017
AGAP12P	-0.0931598	0.0268289	0.0947331	0.0716568	0.0861944	0.0908576
AGAP2	0.156244	4.19994	6.11854	5.93205	5.51334	5.27699
AGAP2-AS1	-0.702429	0.126071	0.0232997	0.0307291	0.0640698	0.0237432
AGAP3	-0.218904	2.34797	0.706796	0.658647	0.773637	0.811888
AGAP4	-0.15587	0.499996	0.846886	0.799198	0.841185	0.98833
AGAP5	-0.0826559	0.145128	1.54209	1.56422	1.64082	1.64151
AGAP6	0.0607466	0.235206	5.30168	5.23564	5.01067	5.06985
AGAP7P	0.238521	0.272691	0.55417	0.489425	0.443894	0.438665
AGAP9	0.00353494	0.00164023	0.104824	0.111093	0.110666	0.104276
AGBL2	0.319276	0.317953	0.259165	0.243206	0.178164	0.223467
AGBL3	0.16752	0.568194	0.452643	0.459033	0.406033	0.403937
AGBL5	0.163785	5.00291	5.41003	5.43353	4.91931	4.7398
AGBL5-AS1	0.917078	0.205147	0.439818	1.04411	0.665179	0.119517
AGER	-0.0170139	0.0272516	0.0524416	0.056312	0.0544422	0.0553655
AGFG1	-0.0260213	0.303338	2.88835	2.88012	2.93375	2.92686
AGFG2	0.0844328	0.695796	7.0424	6.58659	6.52201	6.30397
AGGF1	-0.027732	0.436565	30.6284	30.5704	31.0221	31.2275
AGK	0.00970839	0.0272516	5.91101	5.63285	5.77539	5.66576
AGL	0.0325926	0.470295	3.16	3.14913	3.0571	3.09749
AGMAT	0.705106	26.6363	8.02992	7.59192	4.66934	4.8912
AGO1	-0.108248	2.27564	2.58806	2.57949	2.78701	2.77103
AGO2	-0.0287406	0.341813	3.42066	3.36524	3.47263	3.43466
AGO3	-0.211696	5.04579	5.73724	5.34926	6.44299	6.36709
AGO4	-0.657294	41.6668	2.06834	2.12343	3.30382	3.29286
AGPAT1	-0.080296	0.529487	0.79022	0.793392	0.863033	0.807681
AGPAT2	0.013398	0.0617728	11.9704	12.1038	11.8889	11.9108
AGPAT3	-0.124598	6.38603	9.57166	9.76752	10.58	10.4582
AGPAT4	1.69911	23.209	0.618651	0.629847	0.206942	0.176827
AGPAT4-IT1	2.15236	2.78848	0.218245	0.279369	0.0264764	0.0850347
AGPAT5	-0.10635	7.93054	38.5321	37.8709	41.0711	40.9957
AGPS	-0.011955	0.16515	26.4172	26.7512	26.6386	26.8551
AGRN	-0.210603	0.615076	0.273261	0.309596	0.31021	0.362744
AGRP	-0.00356677	0.00152316	0.578129	0.463666	0.62838	0.413985
AGTPBP1	0.150446	8.86058	7.67945	7.75353	6.83936	7.03457
AGTRAP	0.320499	4.73637	2.91669	3.09307	2.43679	2.36563
AHCTF1	-0.134691	12.7913	5.79299	5.83607	6.40538	6.33403
AHCTF1P1	0.054068	0.114819	0.733876	0.731229	0.706862	0.701275
AHCY	-0.0370951	1.51416	21.6768	21.6817	22.345	22.0463
AHCYL1	0.0189815	0.178382	4.62415	4.67124	4.58209	4.57185
AHCYL2	-0.248873	4.24679	1.05515	1.03784	1.26033	1.22134
AHDC1	0.229425	1.89759	2.06986	2.01041	1.69094	1.78153
AHI1	0.12665	1.55181	1.24223	1.33202	1.13289	1.21979
AHNAK	0.827706	1.05882	0.0120288	0.0106674	0.00684349	0.00591751
AHNAK2	-0.0557067	0.00468568	0	0.00321999	0.00201409	0.00132691
AHR	0.0645702	0.580205	7.60569	7.80569	7.64058	7.06544
AHRR	-0.303155	0.289259	0.0644294	0.0595511	0.0718841	0.0807242
AHSA1	-0.0558634	2.44565	84.1749	83.705	87.2389	86.8875
AHSA2	0.0261811	0.209684	3.61745	3.46324	3.5341	3.4041
AICDA	-0.455258	50.7862	12.4784	12.8116	17.0865	17.5109
AIDA	0.213965	3.83103	10.2738	10.6876	9.22897	8.8052
AIF1	-1.29095	13.113	0.151994	0.155714	0.388475	0.362878
AIF1L	-0.680219	0.258176	0.0051811	0.011958	0.0115757	0.0158391
AIFM1	0.034877	0.386981	7.09464	7.03447	6.85766	6.90362
AIFM2	-0.0931462	0.158189	1.89884	1.59722	1.76527	1.95553
AIFM3	-0.116786	0.0370447	0.0342587	0.0163159	0.0353269	0.0193949
AIG1	1.96587	47.957	0.856268	0.85284	0.239697	0.196992
AIM2	3.43421	37.01	1.26267	1.35942	0.0930026	0.148802
AIMP1	0.0064546	0.041253	9.31713	9.39297	9.39043	9.19601
AIMP2	0.00278035	0.00997715	5.23311	5.28904	5.23249	5.24651
AIP	0.0591785	1.10678	25.5311	25.2797	24.4036	24.2585
AIRE	-1.63068	0.372309	0.0103939	0.0102811	0.0267951	0.0370712
AIRN	-0.214551	0.124204	0.0770188	0.0701685	0.0898703	0.0805501
AJUBA	0.862979	2.00418	0.123301	0.13328	0.0773363	0.0634718
AK1	0.253635	0.314167	0.217827	0.191136	0.186579	0.155739
AK2	-0.0853576	8.56108	11.9496	12.0451	12.6675	12.7341
AK3	0.0119734	0.0779427	3.4617	3.62086	3.47123	3.53754
AK4	1.02783	132.967	2.36183	2.40399	1.12537	1.20671
AK5	-0.280714	0.244597	0.0952239	0.100686	0.142211	0.0953633
AK6	0.0291645	0.221434	28.4912	29.1632	27.513	28.8622
AK7	0.324184	0.115546	0.0165903	0.0121293	0.00669429	0.0161711
AK9	0.236193	1.03632	0.328577	0.347599	0.284532	0.288291
AKAP1	-0.126339	6.57796	10.2958	10.1505	11.0512	11.2168
AKAP10	0.16294	1.90855	3.24941	3.22615	2.96748	2.80421
AKAP11	-0.37301	111.97	21.4571	21.5479	27.6661	27.9057
AKAP12	-0.120495	0.0662788	0.0384999	0.0296194	0.0448467	0.0290612
AKAP13	-0.112273	19.579	12.2779	12.2322	13.21	13.2257
AKAP14	0.538651	0.146552	0.0607421	0.0660912	0.0375816	0.0495186
AKAP2	-0.090398	0.15327	0.182535	0.165272	0.175245	0.194173
AKAP3	0.478775	0.662094	0.137584	0.205019	0.114236	0.131098
AKAP5	-0.0938868	0.432839	1.98132	1.97068	2.11862	2.08994
AKAP6	0.88544	0.422907	0.0331994	0.0124562	0.0129855	0.011666
AKAP7	-1.43293	1.89838	0.0209966	0.0252192	0.0634073	0.0611321
AKAP8	-0.121809	3.98567	22.7003	22.9299	24.6121	24.9292
AKAP8L	0.0154301	0.125742	13.0981	12.9214	12.8342	12.8519
AKAP9	0.0509005	2.2424	10.8974	11.1319	10.5904	10.6291
AKIP1	0.111294	0.396518	1.12674	1.21117	1.07843	1.08129
AKIRIN1	-0.0971857	3.37287	19.7456	20.0048	21.1802	21.2476
AKIRIN2	0.0691096	0.539333	18.3826	17.7382	17.6341	16.723
AKNA	-0.000702437	0.00607898	16.0272	16.2792	15.9932	16.2581
AKR1A1	0.0969112	2.78135	16.0413	15.8893	14.8951	14.8956
AKR1B1	-0.196458	17.599	28.7997	29.7033	33.4559	33.4371
AKR7A2	0.0784767	1.02159	9.95002	10.0554	9.33229	9.57216
AKR7A2P1	-0.316826	0.704316	1.67849	1.34953	1.82338	1.9391
AKR7A3	0.129007	0.0630184	0.307944	0.437865	0.347315	0.333418
AKR7L	-0.303169	0.0893818	0.0587704	0.126524	0.07308	0.155007
AKT1	-0.106871	5.64648	17.0059	16.8625	18.2659	18.127
AKT1S1	-0.0775041	0.470562	2.1124	2.04664	2.21206	2.16692
AKT2	-0.125205	6.13348	5.86043	5.74332	6.35232	6.27573
AKT3	-0.667643	0.409099	0.0252417	0.0170235	0.0248456	0.0420908
AKTIP	0.118494	0.808172	2.55412	2.42219	2.3029	2.27089
ALAD	0.0423124	0.198558	2.39119	2.43313	2.31409	2.36052
ALAS1	0.155256	3.09597	4.6268	4.66669	4.11614	4.21076
ALAS2	-0.211081	0.0699589	0.0420251	0.0237537	0.0433354	0.0326285
ALCAM	0.0941923	2.72318	6.95835	6.99431	6.42116	6.62065
ALDH16A1	0.0119702	0.0590685	7.07657	6.89451	6.8908	6.93413
ALDH18A1	-0.0400272	1.34246	6.79669	6.76978	6.95325	6.96431
ALDH1A1	-0.762889	0.188208	0.0100807	0.0448709	0.0623702	0.0308177
ALDH1A3	0.13112	0.222388	0.435592	0.437704	0.413526	0.382233
ALDH1L2	-0.621239	1.26162	0.0681565	0.0587937	0.0792711	0.115487
ALDH2	-0.306262	24.4523	18.9359	19.1819	23.7072	23.3238
ALDH3A2	0.122613	1.48845	4.43258	4.68032	4.1612	4.1912
ALDH3B1	-0.450755	0.797345	0.082738	0.0697794	0.0978909	0.11005
ALDH3B2	-0.447036	1.59775	0.426427	0.424092	0.575942	0.580966
ALDH5A1	-0.293816	165.999	52.8372	53.5263	65.3363	64.7703
ALDH6A1	-0.040549	0.179322	1.50664	1.54013	1.58046	1.54644
ALDH7A1	3.1301	0.959499	0.0114152	0.00322609	0	0.00166178
ALDH8A1	-0.877038	0.222936	0.00808599	0.00639859	0.0150086	0.0115358
ALDH9A1	0.107623	2.15626	24.4515	23.9974	22.4933	22.3741
ALDOA	0.13588	56.4569	119.683	118.832	108.979	107.625
ALDOB	-0.324181	0.160805	0.132655	0.0971965	0.141858	0.145193
ALDOC	0.275459	21.3151	69.8258	66.8432	56.6552	56.01
ALG1	0.0638234	0.465178	4.08308	4.11401	3.94624	3.87919
ALG10	-0.101898	1.23613	11.3201	11.7387	12.4296	12.2638
ALG10B	0.186505	3.22518	2.07796	2.01026	1.82597	1.75868
ALG11	0.138047	0.570288	2.2545	2.30713	2.05583	2.0805
ALG12	0.121589	1.1501	11.5434	11.9202	11.1623	10.3599
ALG13	-0.0292588	0.179581	0.998478	1.06171	1.05877	1.03917
ALG14	-0.198215	1.11346	2.723	2.75133	3.20616	3.06105
ALG1L	-0.410899	0.154169	0.0691215	0.123068	0.128298	0.126787
ALG1L2	0.886834	0.692598	0.444852	0.330018	0.216619	0.201475
ALG1L9P	-0.165251	0.10766	0.133428	0.108825	0.118278	0.152665
ALG2	0.259056	8.57057	7.88404	8.06516	6.59235	6.70618
ALG3	0.142419	3.37185	9.48943	9.29105	8.57966	8.39836
ALG5	0.23006	3.77102	11.8187	11.1733	9.75611	9.80309
ALG6	0.0125713	0.0624537	12.4058	12.7262	12.3548	12.5049
ALG8	0.135	3.13016	16.9564	17.4631	15.5962	15.6806
ALG9	0.102405	1.32141	0.328772	0.342899	0.314884	0.309429
ALK	-0.293718	0.0515816	0.00571283	0.0150689	0.0196365	0.00582157
ALKAL2	-0.0739469	0.0541003	0.639821	0.717261	0.72135	0.704159
ALKBH1	0.0329722	0.148333	10.0563	9.71942	9.68137	9.60487
ALKBH2	0.0213192	0.146814	11.5778	11.7056	11.54	11.3523
ALKBH3	-1.30199	27.8368	2.46033	2.2302	5.58463	5.95352
ALKBH3-AS1	-1.6632	1.4024	0.0370903	0.0611463	0.172111	0.138586
ALKBH4	0.00808547	0.0261256	10.8042	10.1712	10.4762	10.3356
ALKBH5	0.0261571	0.478112	52.0751	51.6675	51.1491	50.5077
ALKBH6	0.0985559	0.417785	4.11385	4.46698	4.02235	3.97496
ALKBH7	0.190057	3.08425	22.9448	22.9879	19.6369	20.5363
ALKBH8	-0.0849835	1.09279	5.42836	5.5148	5.73854	5.84315
ALMS1	0.0163373	0.179825	9.75581	9.74373	9.54926	9.6882
ALMS1-IT1	0.305319	0.652099	1.35021	1.25542	1.07208	1.03193
ALMS1P1	0.195421	0.0328355	0.0374608	0.0592868	0.0231773	0.0610781
ALOX12	0.0412078	0.0374289	0.775122	0.68152	0.68436	0.727924
ALOX12-AS1	0.463267	0.434488	1.17285	1.08761	1.03934	0.597585
ALOX12B	-0.19608	0.375564	1.10777	0.930439	1.12261	1.2067
ALOX15	0.630337	0.276813	0.102295	0.0747886	0.0779666	0.036258
ALOX15P1	-1.36849	3.85877	0.605326	0.669199	1.52378	1.75983
ALOX5	0.0538657	0.731616	6.50701	6.38835	6.33773	6.05831
ALOX5AP	0.2079	4.23819	16.061	16.4292	14.0862	13.983
ALOXE3	0.12107	0.0159538	0.0071992	0.00890134	0.00927959	0.00550217
ALPK1	0.138842	3.29544	3.53569	3.52091	3.19701	3.19809
ALPK3	-0.0211334	0.00601836	0.0283181	0.0290881	0.038186	0.019978
ALS2	0.385197	4.06566	1.08154	1.10466	0.810759	0.859411
ALS2CR12	-0.190039	0.116769	0.0671473	0.0551133	0.0721874	0.0669695
ALX3	0.0855661	0.10148	1.48237	1.44238	1.40398	1.34639
ALX4	-0.386137	0.101479	0.00869651	0.032258	0.0224192	0.0310171
ALYREF	-0.0240276	0.447311	175.1	177.625	178.068	179.797
AMACR	0.521361	0.773669	0.111845	0.11449	0.0844877	0.0728902
AMBN	0.637858	0.950492	0.441808	0.484258	0.332453	0.261612
AMBRA1	-0.0215857	0.156093	2.96439	2.94262	3.01583	2.96719
AMD1	-0.161859	26.7991	18.2842	18.5132	20.4851	20.5915
AMDHD1	-0.191436	0.156117	0.385228	0.347913	0.379968	0.455142
AMDHD2	-0.0247611	0.0583696	2.26093	2.01709	2.23855	2.10392
AMER1	0.193928	2.21669	2.80804	2.69964	2.29501	2.50882
AMER2	-2.62575	0.589844	0.00115629	0	0.00238468	0.00471318
AMFR	-0.366118	142.482	26.6486	26.5849	34.381	34.0811
AMH	0.100285	0.0657567	0.449814	0.527562	0.563233	0.347055
AMIGO1	-0.0467737	0.00596881	0.0192387	0.0190299	0.0198386	0.0196049
AMIGO3	0.0481226	0.186903	5.83562	6.23881	5.95163	5.7023
AMMECR1	0.188766	28.6871	16.0643	16.186	14.0437	14.1892
AMMECR1L	-0.0762352	0.950492	5.22008	5.13817	5.36836	5.52758
AMN	0.352007	4.62542	9.15419	9.10806	7.2204	7.05702
AMN1	-0.169916	0.712911	0.70934	0.648006	0.775961	0.74765
AMOT	5.08421	7.3895	0.344692	0.334831	0.0164049	0.00360259
AMOTL1	-2.29642	0.840076	0.00133256	0.00131809	0.00824464	0.00475272
AMPD2	-0.0148021	0.0918464	2.61022	2.55364	2.62214	2.58356
AMPD3	0.293892	8.65447	1.73497	1.74305	1.39188	1.43883
AMT	0.295187	1.18228	0.451949	0.457204	0.3613	0.377978
AMY2A	0.94761	0.199506	0.0355754	0.0633408	0.0440216	0.00725051
AMY2B	0.13555	0.215816	1.30466	1.15355	1.12569	1.10701
AMZ1	0.313595	1.53995	0.492651	0.4562	0.362585	0.399097
AMZ2	0.146092	9.26545	3.67182	3.74528	3.33511	3.35311
AMZ2P1	-0.0170558	0.0623725	6.86177	7.18032	7.24317	6.93604
ANAPC1	-0.062737	4.03603	40.9681	40.2393	42.2837	42.346
ANAPC10	-0.124915	0.794377	1.00086	0.982873	1.06176	1.09654
ANAPC11	0.165078	5.09182	5.79099	5.46223	4.98232	5.03174
ANAPC13	0.0483166	0.408547	10.1183	10.1872	9.75955	9.83417
ANAPC15	0.0185128	0.0411087	0.925289	1.02715	0.993758	0.92985
ANAPC16	-0.00596207	0.0442189	5.87026	5.83967	5.99895	5.73429
ANAPC1P1	0.373655	0.951889	1.34575	1.6054	1.04601	1.22665
ANAPC2	-0.000219834	0.00128937	20.493	21.1493	20.5259	21.0317
ANAPC4	0.00706091	0.0426276	14.4683	14.8066	14.8986	14.1717
ANAPC5	0.0800218	6.29805	39.4984	39.6286	37.4456	37.249
ANAPC7	-0.0225124	0.363943	32.8164	32.6914	32.8898	33.5011
ANG	1.54389	0.417092	0.0605871	0.0479437	0	0.0370442
ANGEL1	-0.074656	0.938471	11.6695	11.6202	12.1856	12.287
ANGEL2	-0.110792	2.18696	2.11362	2.04106	2.25803	2.21842
ANGPT2	-0.813717	7.63201	0.181746	0.195569	0.333265	0.328565
ANGPTL1	-0.570087	2.97143	0.868826	0.69349	1.12076	1.19302
ANGPTL2	-1.10072	2.47783	0.109862	0.154772	0.284935	0.281579
ANGPTL3	-0.159967	0.0280102	0.0282356	0.0199494	0.0207971	0.0328834
ANGPTL4	-0.0882082	0.0576855	0.198491	0.151834	0.166473	0.204966
ANGPTL5	0.674923	0.270514	0.0654413	0.0995863	0.0467182	0.0564273
ANGPTL6	0.233643	1.36341	2.43465	2.45685	1.99696	2.15376
ANGPTL7	-0.127781	0.127716	0.561273	0.596306	0.568056	0.693761
ANGPTL8	0.741352	0.49233	0.355705	0.419507	0.225721	0.237003
ANK1	0.280467	2.69929	0.261541	0.24983	0.215172	0.20494
ANK2	0.960102	92.355	1.66979	1.73303	0.902118	0.843367
ANK3	-1.03681	2.08284	0.00924604	0.00758424	0.0176734	0.0167758
ANKAR	0.0547007	0.0717822	0.686608	0.66044	0.64948	0.644584
ANKDD1A	0.512992	1.39201	0.663348	0.652356	0.494242	0.425902
ANKDD1B	0.0597048	0.0144154	0.0701837	0.0601657	0.072372	0.0524476
ANKEF1	-0.032845	0.104285	1.28301	1.26705	1.32621	1.27695
ANKFN1	-0.15331	0.0280673	0.0295768	0.0341318	0.030499	0.0401863
ANKFY1	-0.0121154	0.0826232	2.31721	2.2991	2.3288	2.31626
ANKH	0.0693978	1.07085	8.14084	8.31766	7.81939	7.83212
ANKHD1	0.0856154	0.228618	0.488498	0.501781	0.472562	0.458671
ANKHD1-EIF4EBP3	-0.4169	0.168077	0.0171419	0.0268468	0.0353529	0.0232909
ANKIB1	0.13093	7.16188	22.6491	23.0912	20.7611	20.9199
ANKLE1	-0.155134	12.0328	9.53326	9.63448	10.7151	10.5826
ANKLE2	-0.0820483	4.32376	41.5747	41.799	43.8684	44.1911
ANKMY1	0.0538764	0.246734	1.14773	1.15606	1.11131	1.10321
ANKMY2	-0.0711475	0.577288	12.2577	12.1985	12.7121	12.9237
ANKRA2	0.191827	1.12601	4.98547	4.65233	4.17875	4.24008
ANKRD1	1.76012	0.580494	0.0302165	0.0956434	0.00623173	0.0307916
ANKRD10	-0.217768	13.5614	11.0748	11.2144	13.0769	12.7883
ANKRD11	-0.00940952	0.0988223	5.06312	5.09163	5.14134	5.05777
ANKRD12	0.212746	16.3029	3.92527	3.80427	3.33484	3.32022
ANKRD13A	0.0711229	8.62781	161.715	160.129	151.31	154.374
ANKRD13B	-0.123817	1.04148	6.24212	6.45334	6.90594	6.8974
ANKRD13C	0.00950371	0.0676962	15.2713	15.5875	15.0695	15.5191
ANKRD13D	-0.00714275	0.0327905	10.7515	10.1956	10.5088	10.4953
ANKRD16	0.0529166	0.216608	2.8717	2.94055	2.77355	2.81713
ANKRD17	-0.0741398	4.39795	5.91097	5.85929	6.20394	6.15992
ANKRD18CP	-1.19777	0.391056	0.01826	0.00903091	0.0345205	0.0279113
ANKRD18DP	-1.72674	11.5427	0.316943	0.223931	0.976232	0.809536
ANKRD19P	0.159345	0.281483	1.36483	1.1915	1.10352	1.18008
ANKRD20A11P	-0.148544	0.0964858	0.482459	0.878525	0.72364	0.782158
ANKRD20A12P	0.246449	0.0385332	0.0409721	0.0337729	0.0140832	0.0487106
ANKRD20A4-ANKRD20A20P	0.0611444	0.0209413	0.0462807	0.0996354	0.0814111	0.0582584
ANKRD20A5P	0.412084	0.134636	0.0321731	0.073195	0.026541	0.0524567
ANKRD20A8P	0.0344415	0.00596881	0.0162851	0.03866	0.0436614	0.00995702
ANKRD20A9P	-0.519548	0.118197	0.00720575	0.0392015	0.0297217	0.0367145
ANKRD22	0.729062	0.130969	0.0238875	0.0118141	0.0184742	0.00304277
ANKRD23	0.0565608	0.134567	3.023	3.00845	3.01256	2.77483
ANKRD24	0.710977	0.715737	0.130495	0.143747	0.0795152	0.0876453
ANKRD26	-0.00628649	0.0400732	5.59987	5.67322	5.57746	5.71992
ANKRD26P1	-2.5074	1.07477	0.00388964	0.00384743	0.026071	0.0178365
ANKRD26P3	-0.785656	0.130855	0.0128206	0.00634073	0.0264407	0.00653231
ANKRD27	0.0933309	3.15273	25.97	26.506	24.5599	24.5222
ANKRD28	-0.0223918	0.34144	2.05148	2.05683	2.04954	2.11377
ANKRD30B	-1.13714	0.313156	0.00518449	0.0153847	0.0240577	0.0211327
ANKRD30BL	0.150826	0.145105	0.419788	0.374083	0.37438	0.339139
ANKRD30BP2	1.98009	5.73318	0.285894	0.293138	0.0575237	0.0888219
ANKRD31	0.417658	0.250281	0.0750712	0.0605777	0.0590775	0.0422763
ANKRD33B	-0.527595	6.67312	0.758661	0.720209	1.08684	1.04031
ANKRD34A	0.103095	0.115517	0.487115	0.572985	0.46497	0.519864
ANKRD36	0.12695	4.07041	13.4784	13.463	12.186	12.4314
ANKRD36B	0.12526	2.04913	7.26854	7.14617	6.59666	6.59023
ANKRD36BP1	-0.13336	1.2495	12.6072	13.5313	14.7752	13.8354
ANKRD36BP2	0.0162896	0.29841	142.397	142.634	141.297	139.922
ANKRD36C	0.0811717	2.18268	12.8628	13.0646	12.2668	12.189
ANKRD37	0.30596	1.09928	4.41834	4.58327	3.40729	3.85739
ANKRD39	0.157807	1.00479	15.5943	14.7025	13.6836	13.4141
ANKRD40	-0.148781	6.22668	20.6702	20.412	22.935	22.5108
ANKRD42	-0.0550911	0.186632	0.564785	0.590637	0.577017	0.620705
ANKRD44	-0.1824	11.9378	14.3598	14.0088	16.0235	16.0971
ANKRD44-IT1	-0.530545	1.72008	1.53047	1.53596	2.14265	2.27678
ANKRD45	-0.783692	0.032581	0.0267356	0	0.0459488	0
ANKRD46	-0.165673	3.34043	4.37281	4.44688	5.1426	4.72962
ANKRD49	0.157773	2.56719	20.4474	21.5409	18.265	19.2905
ANKRD50	0.0583677	0.346096	1.65087	1.71147	1.64753	1.57469
ANKRD52	0.0071164	0.0357243	5.9747	5.8132	5.79483	5.90889
ANKRD53	0.677889	0.465686	0.110062	0.080218	0.0448001	0.0737872
ANKRD54	0.0955284	1.01346	3.01604	3.12844	2.8597	2.87866
ANKRD6	0.934111	3.35055	0.0616818	0.0751601	0.0350288	0.0364381
ANKRD61	-0.319118	0.73692	1.50529	1.46414	2.06101	1.6362
ANKRD62	0.126703	0.0164447	0.0125822	0.00995652	0.00518981	0.015386
ANKRD62P1-PARP4P3	0.148188	0.0186496	0.0388328	0.0230468	0.0240262	0.0316575
ANKRD7	0.177083	0.498144	3.65928	3.65437	3.03866	3.4152
ANKRD9	-0.785667	0.356868	0.00744882	0.00982398	0.0179225	0.0118076
ANKS1A	-0.166086	3.3775	6.52594	6.33259	7.01974	7.37503
ANKS1B	-1.37254	11.6205	0.00799079	0.00714139	0.0198771	0.0192143
ANKS3	-0.198692	1.49212	0.901252	0.807746	0.99336	0.963586
ANKS4B	-0.241914	0.0317572	0.00817843	0.0202242	0.0168669	0.0166682
ANKS6	-0.289243	7.99054	4.03739	4.14282	4.91216	5.06212
ANKUB1	0.628411	0.130167	0.0178895	0.0106172	0.0166026	0.001823
ANKZF1	0.269449	18.6901	14.905	14.3485	11.8982	12.317
ANLN	-0.0560436	1.46867	9.62625	9.78127	10.0003	10.1318
ANO10	-0.357873	0.196281	0.00914171	0.00979604	0.0133546	0.0108683
ANO3	0.82886	0.150655	0.00339851	0.00403395	0.00140179	0.00277056
ANO5	-1.9168	0.403333	0.00178909	0.000884836	0.00276731	0.00729256
ANO6	0.255542	19.4137	4.96652	4.83915	4.09642	4.09937
ANO7	0.220781	0.0913008	0.0475955	0.0776803	0.0490796	0.0582017
ANO8	-0.371133	2.39631	1.20647	1.21895	1.57288	1.55728
ANO9	-0.247222	2.14387	1.83925	1.81929	2.20776	2.12527
ANP32A	-0.0537595	3.21385	127.907	128.793	132.777	133.087
ANP32A-IT1	-0.170037	0.417085	1.10062	1.24982	1.3552	1.2839
ANP32AP1	0.134275	0.181605	2.83584	3.12382	2.8578	2.56143
ANP32B	0.0442075	0.636269	56.5635	55.8036	54.1413	54.5941
ANP32C	0.545136	0.539085	0.877136	0.917672	0.574001	0.653184
ANP32D	0.340186	0.0743779	0.270571	0.237898	0.217006	0.183814
ANP32E	-0.0581215	3.54858	18.5397	18.3307	19.1843	19.1176
ANTXR2	-1.19033	0.226653	0.000470748	0.00186255	0.00388341	0.00143912
ANTXRLP1	-0.149765	0.409206	2.1843	2.53349	2.66974	2.55355
ANXA11	0.241785	42.7779	16.1434	16.2936	13.8437	13.5293
ANXA2	1.66638	inf	24.3754	23.9937	7.6543	7.55093
ANXA2P1	1.71298	3.05806	0.451288	0.472649	0.145995	0.135258
ANXA2P2	1.97875	27.4415	3.55617	3.71499	0.823217	1.0169
ANXA2P3	2.08252	2.56184	0.264086	0.348294	0.0544641	0.0897042
ANXA2R	0.674838	7.56166	5.66061	5.91489	3.46548	3.76904
ANXA4	-0.815244	0.478235	0.0143926	0.0177955	0.0247356	0.0317775
ANXA5	0.812584	17.8956	8.90257	9.35401	5.60537	4.76872
ANXA6	1.57137	72.6312	2.9657	3.23071	1.05382	1.02682
ANXA7	0.186753	14.7021	14.2139	14.2934	12.4119	12.579
ANXA9	-0.311322	0.355776	0.472379	0.467252	0.568292	0.595026
AOAH	1.20033	0.673521	0.0326508	0.0290668	0.0168344	0.00998166
AOC2	-0.0680599	0.120415	0.89249	0.871658	0.843625	1.00134
AOC3	0.538266	2.13106	0.199917	0.205163	0.134857	0.143454
AOC4P	1.6544	0.383938	0.0286561	0.0453521	0.00590992	0.0175209
AOX1	1.15026	5.07249	0.373369	0.41728	0.190005	0.165532
AOX3P-AOX2P	0.684544	0.674576	0.0547353	0.0602937	0.0372004	0.0342269
AP1AR	-0.0848499	1.77238	4.54218	4.67745	4.7838	4.97278
AP1B1	0.0713815	7.10538	34.4511	34.1704	32.5663	32.5992
AP1G1	0.0489485	1.43699	13.3708	13.3376	12.7445	13.0158
AP1G2	0.0114173	0.0549842	5.10826	5.25845	5.14792	5.11491
AP1M1	0.150769	3.77721	12.6951	13.239	11.8355	11.4757
AP1M2	-0.815918	0.20288	0.00681692	0.0269718	0.0316326	0.0277867
AP1S1	-0.022932	0.142446	38.2723	37.857	39.4467	37.7363
AP1S2	-0.241682	7.13454	8.5901	8.58805	10.413	9.85465
AP1S3	0.159229	0.777106	0.816841	0.865126	0.736508	0.766406
AP2A1	0.0696439	1.50336	14.1466	14.4571	13.7411	13.4562
AP2A2	-0.031648	0.27392	3.30973	3.33771	3.39139	3.38868
AP2B1	0.182756	15.963	13.6064	13.5675	11.9735	11.9149
AP2M1	0.034384	1.46044	66.0342	65.3336	64.5951	63.4
AP2S1	0.167368	5.8747	15.8815	15.7778	14.121	14.0091
AP3B1	0.0147274	0.139345	14.9045	14.5511	14.3249	14.7663
AP3B2	-0.820646	0.425035	0.00586134	0.0115955	0.0143547	0.0164255
AP3D1	-0.055917	1.43053	14.7849	15.0471	15.7325	15.2122
AP3M1	0.00387349	0.0327905	4.51014	4.51878	4.54364	4.44165
AP3M2	0.182862	3.52715	5.36848	5.32477	4.83271	4.56749
AP3S1	0.465411	79.1783	14.3539	14.2639	10.3194	10.3619
AP3S2	-0.0570322	0.0344007	0.047771	0.0380646	0.043103	0.0459758
AP4B1	-0.0656695	0.47439	2.36673	2.33081	2.4939	2.41178
AP4B1-AS1	0.0443077	0.0698119	1.17899	1.26014	1.21913	1.14136
AP4E1	-0.158006	7.04549	6.22828	6.1894	6.88058	6.94386
AP4M1	-0.179833	1.75983	8.79897	8.87463	9.87294	10.1028
AP4S1	-0.0861422	1.01084	2.14049	2.14097	2.25133	2.28356
AP5B1	-0.11905	3.77231	12.4875	12.4874	13.3449	13.7181
AP5M1	-0.0296493	0.375723	18.6986	18.8377	18.9339	19.2974
AP5S1	-0.092262	0.475085	2.70109	2.88276	2.92251	3.0172
AP5Z1	0.049512	0.425035	9.39949	8.926	8.74668	8.92077
APAF1	0.0403442	0.470295	2.30551	2.31265	2.22504	2.25589
APBA3	0.337525	8.33893	13.1472	13.8635	10.8024	10.5286
APBB1	0.0432897	0.0591379	0.177715	0.167472	0.173969	0.160296
APBB1IP	0.204305	15.7921	49.4025	48.6827	42.6999	42.2477
APBB2	-0.0362445	0.554594	1.54043	1.57141	1.58187	1.60217
APBB3	0.729196	16.4005	1.56478	1.59324	0.960391	0.940566
APC	0.358795	51.3949	4.4859	4.53714	3.47264	3.54816
APC2	-0.306278	3.80374	0.635742	0.604859	0.753138	0.777411
APCDD1L	0.870828	0.567263	0.0381002	0.0391942	0.0204299	0.0217422
APCDD1L-AS1	2.2698	0.765908	0.0454766	0.0674746	0.0234473	0
APEH	0.00695848	0.0756954	64.8355	65.7118	64.5611	65.0744
APEX1	-0.120249	10.4956	34.6325	34.4736	37.6123	37.3368
APEX2	0.00611755	0.0269623	9.58501	9.68077	9.61741	9.5253
APH1A	0.123264	7.57496	11.2527	11.4409	10.3689	10.4209
APH1B	0.0060038	0.0360265	8.69189	8.74133	8.52218	8.80013
API5	0.090114	6.66688	14.7569	14.6674	13.6677	13.9137
APIP	0.0196058	0.128364	45.5928	47.0033	46.4166	44.7359
APLF	0.251076	2.83905	4.30274	4.20709	3.62991	3.50519
APLP1	0.176437	0.0562968	0.0477774	0.0354442	0.0369504	0.0365151
APLP2	0.0866588	14.6501	16.4133	16.6641	15.5731	15.5083
APMAP	0.0603922	0.79202	29.4891	28.8451	28.1388	27.6815
APOA1	-0.853264	0.194313	0.0111346	0.0110138	0.0172227	0.0226931
APOA1-AS	0.560994	0.45841	0.931379	0.963147	0.807625	0.474553
APOB	0.369677	0.0642328	0.00674146	0.00333415	0.00434479	0.00343488
APOBEC2	-0.256068	0.361124	0.749928	1.06587	1.07363	1.09066
APOBEC3A	0.783935	0.563288	0.117742	0.149739	0.0563702	0.0985571
APOBEC3B	0.456911	11.8193	7.67802	7.48451	5.42734	5.59448
APOBEC3C	0.168826	2.47746	27.3181	28.531	25.078	24.4979
APOBEC3D	0.666853	14.0715	5.76151	5.43544	3.46363	3.57312
APOBEC3F	0.600052	6.1531	1.33148	1.28491	0.879611	0.842775
APOBEC3G	0.70689	37.16	3.2048	3.33427	1.97281	2.0245
APOBEC4	-2.1374	0.63328	0	0.0169254	0.030878	0.0435919
APOBR	-0.248286	0.38231	0.445159	0.387612	0.536623	0.450437
APOC1	0.874133	0.572784	0.195086	0.136946	0.103829	0.0769545
APOE	-0.306709	0.202936	0.0660374	0.0710843	0.086122	0.0831282
APOF	-0.498678	0.523353	0.295645	0.334213	0.515364	0.373004
APOL1	0.916069	1.28602	0.0615981	0.0578831	0.0370526	0.0261544
APOL2	-0.0867995	0.397242	2.63891	2.85104	2.88071	2.93718
APOL3	-0.0846277	0.682989	1.65926	1.72779	1.7764	1.80748
APOL4	0.393489	0.0948476	0.0161249	0.0177221	0.0129326	0.0127803
APOL5	-1.77169	14.8014	0.704875	0.606996	1.94968	2.51825
APOL6	-0.299608	74.4163	22.0912	22.1562	27.2911	27.0508
APOLD1	0.248482	1.22519	0.773691	0.717698	0.629373	0.623249
APOM	0.121899	0.166775	0.161714	0.147654	0.133886	0.149739
APOO	0.161241	1.13865	7.12277	6.85383	6.26957	6.20152
APOOL	0.357725	9.21948	4.3157	4.32525	3.28793	3.44032
APOPT1	0.0975626	0.819925	3.27257	3.49283	3.16188	3.14767
APPBP2	0.0786481	1.13246	5.06838	5.00973	4.61624	4.90562
APPL1	0.0822813	2.25498	17.433	17.8372	16.6847	16.5583
APPL2	-0.0821284	0.521479	2.33873	2.35336	2.38638	2.56936
APRT	0.0368553	0.65432	89.0631	89.8385	86.4755	87.5313
APTR	-0.128058	0.947937	2.0371	2.05526	2.22656	2.2359
APTX	0.00280377	0.011997	2.01379	2.07303	2.04687	2.02326
AQP1	0.405758	0.0634077	0.00424034	0.0188745	0.0131177	0.00432105
AQP11	-0.369281	0.592384	0.519189	0.535408	0.740416	0.619126
AQP3	0.25161	10.4893	17.2904	17.6009	14.8806	14.3642
AQP6	-0.634429	0.157385	0.026887	0.0265952	0.0600715	0.0228323
AQP7P1	-0.529094	0.537269	0.145821	0.144239	0.192779	0.2248
AQP7P3	-0.725906	0.176377	0.0904768	0.134242	0.186596	0.184398
AQR	0.105065	4.71239	26.8101	26.887	25.0659	24.7515
ARAF	-0.109927	2.61845	10.2475	10.1677	10.9139	11.069
ARAP1	-0.110414	3.57199	6.35306	6.60734	7.00875	6.9525
ARAP1-AS2	-0.342688	0.86038	1.08844	1.07663	1.41137	1.32833
ARAP2	0.333041	20.8141	3.07503	3.14388	2.48159	2.44475
ARAP3	1.45306	0.41244	0.011355	0.0269563	0.00702544	0.00694268
ARCN1	0.10582	6.90821	26.7147	27.2617	25.2352	24.8161
AREL1	0.0290685	0.407818	22.0712	22.3102	21.5608	21.84
ARF1	0.10986	14.8335	49.1816	48.8818	45.1669	45.5062
ARF3	0.123578	7.64954	45.6478	45.9006	41.6418	42.2065
ARF4	0.0943682	2.73029	63.4913	61.0139	57.9783	58.384
ARF4-AS1	0.0956798	0.088299	1.52992	1.44125	1.21452	1.55904
ARF5	0.0755669	2.08512	105.133	103.367	98.8615	98.5629
ARF6	-0.0272995	0.579709	53.6415	52.5789	53.8055	54.2044
ARFGAP1	0.0176359	0.179711	4.81115	4.77626	4.7177	4.73241
ARFGAP2	-0.0675416	2.08111	23.2194	23.217	23.995	24.5594
ARFGAP3	0.533369	49.5264	12.1621	12.2478	8.3935	8.43536
ARFGEF1	0.0605229	1.85544	21.8117	21.6453	20.5986	20.9807
ARFGEF2	0.135196	14.3141	29.6433	29.378	26.5546	27.0679
ARFGEF3	-0.710056	0.196887	0.00479866	0.00474658	0.00824714	0.00733499
ARFIP1	0.0706956	0.861109	3.26391	3.13797	3.11021	2.97232
ARFIP2	0.00164644	0.00701099	4.16038	4.30488	4.2767	4.16092
ARFRP1	-0.249735	12.0023	2.00121	1.9365	2.28471	2.38662
ARG1	-0.999264	1.06229	0.128727	0.059686	0.224	0.151674
ARG2	-0.133577	0.903729	7.98497	8.30335	9.28336	8.54809
ARGFXP2	0.0678459	0.0395059	0.542917	0.615138	0.498771	0.603546
ARGLU1	0.016838	0.173263	66.1252	67.7878	65.6847	66.3863
ARHGAP1	-0.0132756	0.0626171	10.993	10.7882	10.922	11.0119
ARHGAP10	0.722837	0.1184	0.0156612	0.0309824	0.0282616	0
ARHGAP11A	-0.191521	25.8144	10.5928	10.5956	12.124	12.0198
ARHGAP11B	-0.156795	1.37577	17.1072	18.5032	19.6289	19.9848
ARHGAP12	0.0717702	0.709159	1.39474	1.44892	1.36225	1.33763
ARHGAP15	0.0543674	0.756533	41.6819	41.6065	39.8798	40.1521
ARHGAP17	0.0634664	0.430146	4.48771	4.75073	4.4715	4.35065
ARHGAP18	-0.0195813	0.0515746	3.87883	3.60747	3.82052	3.7512
ARHGAP19	0.0836857	2.6402	7.2113	7.26995	6.77209	6.86305
ARHGAP21	1.88372	0.325446	0.0149665	0.0230285	0.0102888	0
ARHGAP22	0.284641	0.285288	0.0288516	0.0224012	0.0207939	0.0211812
ARHGAP23	0.747701	5.15436	0.783327	0.668986	0.426776	0.43615
ARHGAP24	-1.19527	80.2513	0.570137	0.574943	1.32195	1.29448
ARHGAP25	-0.0440815	0.328119	3.67436	3.69583	3.69772	3.88416
ARHGAP26	0.198864	3.9047	0.947492	0.93592	0.813468	0.8238
ARHGAP26-AS1	0.491204	0.103834	0.048919	0.145164	0.0630553	0.0747751
ARHGAP27	-0.0345825	0.227198	2.16571	2.22237	2.23788	2.24692
ARHGAP27P1	-0.0275044	0.0396767	1.40218	1.38696	1.42884	1.40779
ARHGAP27P1-BPTFP1-KPNA2P3	0.0344617	0.0823221	3.50542	3.76835	3.36113	3.72505
ARHGAP29	-0.977757	0.314124	0.00159436	0.00131422	0.0021921	0.0035202
ARHGAP30	-0.0183028	0.304045	11.9724	12.048	12.13	12.144
ARHGAP31	2.44321	9.16281	0.131013	0.173274	0.0288412	0.0270013
ARHGAP32	0.740005	0.199607	0.00547547	0.00601783	0.00439149	0.00247986
ARHGAP33	0.0476408	0.18491	2.34568	2.20849	2.12686	2.26924
ARHGAP35	-0.220367	46.71	29.8508	30.0717	34.7687	34.8905
ARHGAP39	-0.389984	0.919274	0.112247	0.116744	0.139577	0.1598
ARHGAP4	-0.121727	7.07005	21.9091	22.0694	23.6475	24.0974
ARHGAP44	0.910062	4.22829	0.120709	0.0977753	0.0666467	0.0493962
ARHGAP45	-0.170402	11.9005	13.1543	12.7494	14.4623	14.6249
ARHGAP5	0.340095	15.8976	2.6057	2.63189	2.0629	2.06572
ARHGAP5-AS1	0.762201	0.432551	0.2876	0.165181	0.133933	0.132356
ARHGAP6	-1.95583	0.555149	0.00108791	0.0010761	0.00560916	0.00277154
ARHGAP9	0.132613	3.23763	4.0248	3.94749	3.64525	3.61096
ARHGDIA	0.10316	7.93768	16.7671	16.8052	15.7661	15.4221
ARHGDIB	0.0896756	12.9317	66.243	65.5611	61.8672	61.722
ARHGEF1	-0.07851	5.11027	25.8811	25.573	27.1751	27.0376
ARHGEF10	0.538322	0.260713	0.0163725	0.0154907	0.0110107	0.010881
ARHGEF10L	-4.13671	1.13859	0.000391142	0	0.0052434	0.00159435
ARHGEF11	1.45817	7.5577	0.144317	0.147076	0.0577228	0.0481299
ARHGEF12	0.151028	6.92737	3.4907	3.52136	3.12039	3.18083
ARHGEF17	1.53677	0.475808	0.0106681	0.0165822	0.00471458	0.00465905
ARHGEF18	-0.0838876	6.12569	23.5283	23.3579	24.6724	24.9114
ARHGEF19	-0.0273316	0.0634766	2.82859	2.78376	2.80262	2.90426
ARHGEF2	-0.139954	11.1765	6.72935	6.64691	7.34878	7.35771
ARHGEF25	0.255996	0.123701	0.0558028	0.0275986	0.0375279	0.032141
ARHGEF26	-0.154915	0.182065	0.0903688	0.127264	0.126355	0.115501
ARHGEF28	-0.155828	0.0281738	0.00334415	0.00529257	0.00551748	0.00408936
ARHGEF3	-1.02119	39.3257	0.608382	0.646973	1.30347	1.23911
ARHGEF33	1.06316	0.938343	0.0747731	0.109573	0.051403	0.0366871
ARHGEF37	0.951237	0.209406	0.00978984	0.024209	0.00757132	0.00997617
ARHGEF38	0.583757	0.378864	0.0690914	0.0478391	0.0284983	0.0492845
ARHGEF39	-0.190944	3.76797	8.97748	8.72048	9.86413	10.2927
ARHGEF4	-0.062265	0.0277236	0.0842994	0.0440522	0.0623256	0.0713164
ARHGEF40	-0.337809	0.115946	0.00748444	0.0107683	0.0126291	0.0104003
ARHGEF6	0.0567797	2.5302	28.0383	27.5514	26.3068	27.0185
ARHGEF7	-0.0283497	0.497799	2.75981	2.78585	2.79316	2.8501
ARHGEF9	0.125031	1.05728	1.08196	1.06851	1.00709	0.960628
ARHGEF9-IT1	-1.26607	0.431977	0.179021	0.0885392	0.246138	0.395262
ARID1A	-0.0847425	2.52177	6.84083	6.61976	7.12027	7.12304
ARID1B	0.0294276	0.543353	6.12645	6.03607	5.87427	6.01614
ARID2	0.102103	3.85794	8.49089	8.49276	7.99047	7.79864
ARID3A	-0.138175	0.370509	4.91368	5.60262	5.47346	6.07431
ARID3B	-0.457515	2.06901	0.328664	0.327852	0.472466	0.427164
ARID3C	0.167411	0.0535345	0.163861	0.181151	0.188849	0.117868
ARID4A	0.15745	4.5592	3.65696	3.72724	3.2899	3.3164
ARID4B	-0.0192295	0.199098	4.46375	4.5899	4.56561	4.58964
ARID5A	0.268635	2.36184	0.858032	0.798228	0.654881	0.716779
ARID5B	0.0789773	1.7904	5.96495	5.90414	5.63406	5.57821
ARIH1	-0.0818979	2.35524	20.8999	20.8121	21.7012	22.349
ARIH2	-0.113515	9.4149	1.90368	1.89687	2.0594	2.04331
ARIH2OS	-0.216295	0.350691	1.35333	1.07385	1.46453	1.34878
ARL1	0.0992205	1.59321	8.18861	8.40392	7.79038	7.66613
ARL10	-0.271207	0.102857	0.0409485	0.0636494	0.0723863	0.0536502
ARL11	-0.101295	0.671062	4.91372	4.98229	5.383	5.21011
ARL13A	-0.44908	0.300619	0.0931497	0.0743054	0.130138	0.0979846
ARL13B	-0.0493903	0.242944	0.850525	0.870072	0.872357	0.904235
ARL14EP	0.0464062	0.790734	43.5586	44.0854	42.1263	42.5577
ARL15	0.0629335	0.506281	14.7038	14.7052	13.7902	14.3009
ARL16	-0.167496	2.01266	2.94552	3.14357	3.45779	3.36651
ARL17A	0.0769403	0.206652	0.15451	0.180077	0.16002	0.156538
ARL2	-0.0354637	0.116347	8.45861	8.81279	9.19383	8.47077
ARL2BP	-0.0827095	2.12848	43.1847	43.1199	45.5838	45.6132
ARL3	0.0548977	0.334814	7.71205	7.52814	7.14523	7.49279
ARL4A	-0.0294254	0.0822536	1.00158	0.993559	1.02094	1.01087
ARL4D	0.594818	0.391194	0.240052	0.237447	0.185653	0.129955
ARL5A	0.00187295	0.0159538	18.627	18.6055	18.3428	18.7591
ARL5B	-0.136296	4.33957	20.2072	20.8468	22.3513	22.6722
ARL5C	0.686812	0.147113	0.0889043	0.100502	0.0916764	0.0258847
ARL6	-0.121147	1.452	0.692685	0.705786	0.755531	0.762131
ARL6IP1	-0.0955396	10.3034	73.2138	72.516	77.1509	78.212
ARL6IP4	0.147759	14.7761	17.3573	17.2895	15.5751	15.6302
ARL6IP5	0.189476	3.5762	18.4413	17.5115	15.3974	16.0589
ARL6IP6	-0.0188668	0.145128	2.61487	2.6124	2.64379	2.64072
ARL8A	0.195695	2.86726	7.42827	7.34765	6.40359	6.46955
ARL8B	0.0170762	0.202065	46.2522	46.8349	45.4821	46.3076
ARL9	0.214586	0.431977	3.68242	4.12247	2.89944	3.81068
ARMC1	-0.0157985	0.154956	18.373	18.1636	18.4045	18.4531
ARMC10	0.233127	9.05178	3.94865	3.96422	3.34252	3.37488
ARMC12	-1.1	2.15413	0.113194	0.115358	0.258206	0.230697
ARMC2	0.146327	0.106441	0.106431	0.122822	0.114738	0.0920236
ARMC4	1.21221	0.245614	0.00473148	0.00655219	0.00390321	0.000964308
ARMC4P1	-0.213381	0.0294569	0.0119799	0.0118499	0.00617672	0.0213639
ARMC5	-0.0198048	0.0702777	1.35049	1.37858	1.38146	1.37934
ARMC6	-0.138194	8.77164	27.7795	27.8049	30.7106	30.3288
ARMC7	0.0863281	0.394096	2.38583	2.31984	2.24126	2.18142
ARMC8	0.118849	4.42586	4.05994	4.01681	3.68682	3.73479
ARMC9	0.303283	1.84858	0.680963	0.631216	0.53634	0.5247
ARMCX3	0.151378	2.9931	4.31113	4.35537	3.89442	3.89183
ARMCX4	-0.289696	0.232834	0.0172394	0.0138945	0.0197522	0.0182182
ARMCX5-GPRASP2	0.331926	0.231986	0.0138339	0.0128103	0.0106231	0.0104979
ARMCX6	0.000688325	0.00160967	1.70504	1.64265	1.75657	1.58248
ARMT1	-0.0345387	0.354632	13.8088	13.9081	14.1455	14.1809
ARNT	-0.0354045	0.338435	1.6812	1.64758	1.71099	1.69301
ARNTL	0.208404	0.165282	0.0102782	0.00796187	0.00906637	0.00668813
ARNTL2	0.191327	3.93618	1.01421	1.01866	0.894363	0.882168
ARNTL2-AS1	-0.140951	0.0518445	0.249538	0.421063	0.469228	0.269246
ARPC1A	0.116377	5.98337	47.7161	47.9747	44.7308	43.3547
ARPC1B	0.121812	14.0326	213.369	210.806	196.344	192.639
ARPC2	0.0914898	12.3466	170.465	167.905	157.865	159.012
ARPC3	0.056031	2.45494	130.481	132.734	125.429	127.206
ARPC4	0.0404242	0.73469	19.2963	19.0815	18.6585	18.5771
ARPC5	-0.0562089	2.30706	50.4041	50.4281	52.6123	51.9983
ARPC5L	0.108309	2.69878	33.3239	35.061	31.9412	31.3627
ARPP19	-0.0308211	1.00145	10.3878	10.4348	10.554	10.6715
ARPP21	0.0192123	0.0256896	0.156689	0.166317	0.161575	0.156489
ARR3	-0.383506	0.24109	0.284928	0.236379	0.350679	0.327816
ARRB2	0.0840721	0.545342	1.48399	1.49287	1.42119	1.38112
ARRDC1	0.000224501	0.00128937	16.4038	16.5714	16.401	16.4971
ARRDC1-AS1	-0.0762457	0.580705	10.623	10.7501	11.5056	10.9795
ARRDC2	-0.225767	5.52989	4.58583	4.56579	5.21981	5.45815
ARRDC3	0.631682	34.8642	1.41474	1.37132	0.9029	0.891346
ARRDC3-AS1	0.163175	0.430948	1.9768	1.89425	1.81794	1.63188
ARRDC4	0.17263	0.0291173	0.0234049	0.0173632	0.0301684	0.0059626
ARSA	0.175604	2.01446	1.07924	1.08229	0.96786	0.941834
ARSB	-0.178183	2.64611	3.06007	3.11109	3.4487	3.51839
ARSG	0.12551	0.577062	2.13951	2.12508	1.8809	2.01949
ARSJ	-0.630577	0.0977403	0.0101583	0.00502404	0.0130938	0.0103517
ARSK	-0.0550719	0.152246	2.74369	2.85119	2.90263	2.89745
ART1	0.45694	0.134757	0.0636003	0.179743	0.0936905	0.0833281
ART3	0.0340396	0.00596881	0.0230088	0.0227591	0.0289987	0.0156311
ART4	-0.579579	0.115026	0.0260418	0.0515184	0.0626589	0.053075
ARTN	0.135492	0.0331245	0.0210365	0.0312122	0.0282001	0.0192932
ARV1	0.0587259	0.347661	5.56049	5.47252	5.29663	5.27305
ARVCF	-0.169099	0.310164	0.674183	0.622993	0.765334	0.690028
ARX	-0.0496686	0.00772318	0.0331128	0.0327534	0.0512179	0.0168715
ASAH1	0.146737	4.75866	9.19674	9.19723	8.34246	8.23659
ASAH2B	0.680906	0.671062	0.0330883	0.0243981	0.0186109	0.0171655
ASAP1	0.151979	1.01429	1.24826	1.23097	1.06044	1.16578
ASAP1-IT1	-0.135812	0.0396767	0.211695	0.0997131	0.197506	0.143816
ASAP1-IT2	-0.260884	0.0645311	0.0350988	0.075222	0.0723863	0.0596113
ASAP2	-0.723281	1.01458	0.0443573	0.0417866	0.0805902	0.0613449
ASAP3	-2.3507	147.285	0.476048	0.457961	2.37963	2.37378
ASB1	-0.0682944	0.915374	4.35837	4.28316	4.4488	4.59137
ASB12	1.24539	0.916433	0.202521	0.245851	0.0949252	0.093807
ASB13	0.199811	14.0107	14.3945	14.3631	12.5011	12.4824
ASB14	0.0208968	0.0186496	0.332387	0.385768	0.345036	0.361294
ASB16	0.107375	0.188122	1.64715	1.79441	1.49767	1.68984
ASB16-AS1	0.0301199	0.0697368	2.95098	2.92636	2.93487	2.80871
ASB2	-0.122299	2.01721	7.49858	7.81732	8.35364	8.28155
ASB3	-0.0448758	0.0697168	0.590687	0.610282	0.630794	0.605501
ASB6	0.0425388	0.329678	3.63715	3.61402	3.61603	3.40947
ASB7	0.0569451	0.574896	7.46155	7.39109	7.17919	7.06755
ASB8	0.11122	1.3631	2.1235	2.00626	1.93048	1.88445
ASB9P1	-0.267088	0.411113	0.840908	1.0994	1.06317	1.26674
ASCC1	0.123137	2.82817	6.01901	6.1428	5.69478	5.44837
ASCC2	0.0596985	0.723376	11.6565	12.0956	11.5487	11.1922
ASCC3	0.170631	17.7287	15.6773	16.1464	13.9926	14.2196
ASF1A	0.21036	15.4349	47.1304	46.9614	40.8684	40.2806
ASF1B	-0.0565046	1.95951	102.152	103.75	106.769	106.892
ASGR1	1.5409	0.301183	0.0165391	0.0327192	0	0.0168539
ASH1L	-0.0146715	0.170767	12.0247	12.1092	12.2381	12.0898
ASH1L-AS1	-0.0636721	0.151477	1.72576	1.6527	1.73784	1.78512
ASH2L	-0.00332036	0.0187296	6.55051	6.59476	6.72443	6.42306
ASIC1	0.312599	0.206732	0.0454866	0.0350792	0.0214649	0.0432098
ASIC3	0.154003	0.179075	0.204399	0.171985	0.179294	0.158246
ASIC4	0.928906	0.723728	0.0622166	0.0635928	0.0384939	0.0274737
ASIP	0.155242	0.0889998	1.02195	0.990644	1.09597	0.708154
ASL	-0.507319	21.8275	3.10567	3.07791	4.48197	4.28851
ASNA1	0.0933991	1.4604	40.4589	40.2355	38.0758	37.3958
ASNS	0.0560413	0.18611	0.894609	0.854386	0.860556	0.818156
ASNSD1	0.031557	0.345474	38.9348	38.6362	36.9695	38.753
ASPDH	0.0139585	0.00483984	0.170546	0.143704	0.117243	0.193103
ASPH	-1.91658	inf	0.435317	0.428189	1.64352	1.6093
ASPHD1	0.689329	0.389648	0.161018	0.238906	0.116227	0.131266
ASPHD2	0.0430575	0.114091	3.04682	3.09185	3.03451	2.91099
ASPM	0.096858	15.0258	32.1599	32.6119	30.0208	30.4125
ASPN	-0.33124	0.763927	0.384026	0.397013	0.513523	0.467078
ASPRV1	0.156705	0.0852411	0.284171	0.216221	0.180327	0.267305
ASPSCR1	0.00816392	0.0303965	4.14481	4.38113	4.13147	4.32777
AS-PTPRE	0.184704	0.147563	0.444411	0.357804	0.303736	0.40021
ASS1	0.780871	3.76295	0.833859	0.743307	0.499602	0.416469
ASTE1	0.104087	0.676476	2.39598	2.36413	2.24843	2.1708
ASTL	-0.817799	0.330485	0.0738156	0.0821413	0.14272	0.131636
ASTN2	1.51065	1.30042	0.0195983	0.0201312	0.00777285	0.00614503
ASXL1	-0.136718	13.2989	25.1221	25.3154	27.6485	27.6817
ASXL2	-0.123228	3.10488	4.87796	4.93275	5.25943	5.40251
ASXL3	0.299484	0.0559314	0.00834144	0.00618818	0.00860153	0.00318758
ASZ1	1.44238	5.75868	0.25863	0.316527	0.106226	0.104974
ATAD1	0.0651662	1.53162	5.02232	5.03052	4.7429	4.84471
ATAD2	0.0376487	1.57432	56.3959	56.5222	55.0045	54.7653
ATAD2B	-0.0886495	1.63132	2.54494	2.61844	2.74333	2.73543
ATAD3A	-0.215919	21.835	19.5399	19.5459	22.3257	22.9696
ATAD3B	-0.178573	9.36997	17.3402	17.1684	19.4754	19.4945
ATAD3C	-0.0516072	0.0530257	0.459939	0.549601	0.518844	0.525314
ATAD5	-0.0374811	0.697407	19.5066	19.8666	20.1094	20.2121
ATAT1	-0.311567	2.28809	0.0645249	0.0708088	0.0862514	0.081361
ATE1	-0.0781898	1.04966	1.72569	1.70497	1.78283	1.83084
ATE1-AS1	0.400777	0.0823221	0.0875928	0.0990196	0.0645171	0.0765085
ATF1	-0.195003	5.63991	18.2072	17.8309	20.6377	20.5254
ATF2	0.063898	1.26406	1.882	1.90757	1.78284	1.83455
ATF3	1.39018	17.3728	0.420872	0.435184	0.183045	0.142961
ATF4	-0.0160383	0.548301	167.334	167.061	170.193	167.208
ATF5	2.12728	inf	8.8821	8.33988	2.02617	1.9074
ATF6	0.0617606	0.89844	9.96056	9.59819	9.38973	9.30804
ATF6B	-0.00322001	0.0186854	3.78265	3.79708	3.86341	3.717
ATF7	-0.269248	2.62713	0.640696	0.641412	0.766061	0.775711
ATF7IP	-0.0458921	0.809938	3.42326	3.5032	3.57253	3.56235
ATF7IP2	-0.975471	8.21638	0.117117	0.0932153	0.197723	0.214822
ATG10	-0.247046	1.43154	1.50081	1.44953	1.71695	1.77654
ATG101	-0.0228181	0.141794	17.7443	17.3861	17.9886	17.624
ATG12	0.162007	2.809	4.24075	4.53773	3.91164	3.91738
ATG13	0.0652901	0.839705	0.217593	0.232623	0.2121	0.217264
ATG14	0.0506018	0.154354	2.69215	2.48177	2.49409	2.49027
ATG16L1	0.0273817	0.171351	2.71153	2.65773	2.6287	2.62801
ATG16L2	0.0331402	0.217944	10.1049	10.1161	9.64454	10.0732
ATG2A	-0.17365	4.35544	6.83961	6.83773	7.72393	7.66925
ATG2B	0.108695	4.06036	8.30796	8.3248	7.65323	7.73853
ATG3	0.0145646	0.0975467	14.449	14.6821	14.1822	14.5927
ATG4A	0.0716687	0.49247	1.35763	1.38338	1.28951	1.31295
ATG4B	-0.0341087	0.406188	15.0236	14.9566	15.1916	15.438
ATG4C	0.121235	1.12898	4.53761	4.64563	4.24648	4.17846
ATG4D	-0.04766	0.3291	4.66843	4.54384	4.74013	4.76046
ATG5	0.0398009	0.426867	3.48109	3.62243	3.46959	3.42586
ATG7	-0.159883	1.2076	0.303651	0.3055	0.328187	0.350822
ATG9A	0.135583	2.06241	3.42348	3.36555	3.14147	3.02527
ATG9B	-0.394556	0.323994	0.0342395	0.0468175	0.056076	0.0502844
ATIC	-0.0422083	0.559814	40.0525	40.8107	41.3606	41.7219
ATL1	-0.562802	4.83462	0.534142	0.541481	0.826196	0.759326
ATL2	-0.0664991	2.47151	3.94328	4.00589	4.10951	4.19636
ATL3	0.348392	14.4376	3.8131	3.98479	2.93623	3.17498
ATM	0.0217752	0.966111	20.2442	20.4084	19.9074	20.0486
ATMIN	-0.0291207	0.299466	8.94809	8.66015	8.90525	9.02198
ATN1	0.013006	0.0113848	0.240924	0.288408	0.276667	0.246904
ATOH7	0.973355	0.911753	0.320737	0.247614	0.161335	0.127548
ATOX1	0.155176	1.9546	58.6653	58.3435	53.7785	51.0741
ATP10B	0.906285	0.356672	0.0299239	0.0186942	0.0194886	0.00641968
ATP10D	0.455858	16.6913	4.99055	4.95979	3.71094	3.52817
ATP11A	0.94971	5.4713	0.15468	0.181857	0.0895455	0.0843427
ATP11B	0.199896	37.1651	41.2907	41.7159	35.9617	36.1473
ATP11C	0.104144	4.45322	11.4285	11.2013	10.4236	10.5834
ATP13A1	0.0536347	0.809469	21.968	21.4021	20.9141	20.7812
ATP13A2	0.350554	16.9624	4.41034	4.46572	3.42343	3.52252
ATP13A3	0.00736593	0.15327	65.0541	65.8776	65.0014	64.9804
ATP13A4	-0.00641849	0.00185443	0.0266715	0.0279339	0.0339744	0.020784
ATP13A5	-0.0413205	0.00459143	0.0229185	0	0.0135047	0.0100092
ATP1A1	0.317975	80.3385	24.6226	24.3554	19.6041	19.5996
ATP1A1-AS1	0.0475689	0.0644839	0.602092	0.591273	0.560566	0.591482
ATP1A2	-0.171788	0.0287604	0.013112	0.0108081	0.0135208	0.0133615
ATP1A3	0.209804	9.09634	6.94296	6.81015	5.875	5.99021
ATP1A4	-1.3753	0.235964	0	0.00998402	0.0156124	0.0102857
ATP1B1	-2.81584	82.1408	0.562903	0.604978	4.1748	4.03186
ATP1B3	0.090419	5.20089	103.37	103.435	96.7253	97.0905
ATP23	0.310803	8.19059	6.64943	6.90928	5.23476	5.67162
ATP2A1	-0.815957	4.18924	0.177851	0.152774	0.312498	0.268277
ATP2A1-AS1	-0.00426	0.00514	1.53261	1.41527	1.49199	1.45803
ATP2A2	-0.105781	13.9306	31.1498	30.5939	33.2702	33.0251
ATP2A3	-0.0162924	0.239473	6.74129	6.50545	6.709	6.65864
ATP2B1	-0.09761	7.52252	16.5336	16.5148	17.6546	17.6298
ATP2B1-AS1	-0.0286088	0.0418705	1.50172	1.40312	1.40962	1.54645
ATP2B2	-0.0416923	0.00596881	0.00265029	0.00262153	0.000455488	0.00495135
ATP2B3	-0.755839	0.202007	0.00641747	0.00362733	0.00850831	0.00840808
ATP2B4	3.31376	232.06	1.26845	1.27202	0.125101	0.129809
ATP2C1	0.194688	12.1059	2.43245	2.46935	2.12282	2.1508
ATP2C2	-0.0437388	0.0075383	0.0158253	0.00722473	0.0100423	0.0136455
ATP2C2-AS1	-0.399155	0.110753	0.0356847	0.0352974	0.0367974	0.0565661
ATP4A	1.30151	0.567555	0.0402886	0.0531352	0.0138483	0.023949
ATP4B	-0.323953	0.0796322	0.0318794	0.11825	0.0657468	0.121823
ATP5A1	-0.025153	2.10877	93.1071	92.6913	94.3281	94.3239
ATP5B	0.000599005	0.00998778	411.145	407.432	410.243	406.209
ATP5C1	0.0349135	0.878227	57.9327	57.5413	56.14	56.3254
ATP5D	0.0679292	0.830096	33.2953	32.175	31.0453	31.2749
ATP5E	0.220199	0.537384	7.65343	8.21695	6.54396	7.04972
ATP5F1	0.0493897	2.13878	130.359	129.158	124.085	126.143
ATP5G1	0.0237804	0.30137	99.0668	99.0965	97.8213	96.679
ATP5G2	0.182162	13.5708	34.1659	33.5856	29.56	30.0224
ATP5G3	0.0919572	6.04723	25.5559	25.7308	24.1027	23.9125
ATP5H	0.112553	4.58847	102.13	103.055	95.7057	93.6715
ATP5I	-0.119414	3.36435	105.009	106.05	115.029	113.747
ATP5J	-0.0541871	0.667388	7.90764	7.9593	8.06556	8.37207
ATP5J2	0.0432603	0.59736	51.353	50.2284	48.9883	49.3739
ATP5L	0.0596675	1.97217	60.0167	60.319	57.7088	57.5002
ATP5L2	0.0759764	0.0440652	0.937506	1.03037	1.18157	0.682393
ATP5O	0.0538959	1.77593	224.646	224.795	215.114	216.896
ATP5S	-0.214232	2.56886	2.58644	2.50609	2.91236	2.98218
ATP6AP1	0.149654	3.27465	23.3467	23.869	21.28	21.1914
ATP6AP1L	0.441932	1.019	0.116241	0.0943423	0.0860574	0.0686423
ATP6AP2	0.243883	10.471	31.372	32.0109	26.3332	27.0737
ATP6V0A1	1.46059	151.541	3.64499	3.49312	1.23337	1.35415
ATP6V0A2	-0.05758	1.89516	24.8446	24.9046	25.9404	25.722
ATP6V0B	0.081979	2.06877	20.9161	21.3549	19.9755	19.8742
ATP6V0C	0.173899	2.16629	12.1511	13.2131	11.1068	11.3289
ATP6V0D1	0.111579	1.12199	19.3702	19.2095	18.5154	17.1177
ATP6V0E1	0.170987	4.68202	63.1489	65.3399	57.0985	56.7842
ATP6V0E2	-0.397359	31.3129	5.10964	5.15595	6.79808	6.69347
ATP6V0E2-AS1	-0.113127	0.267403	1.53039	1.66708	1.68598	1.76483
ATP6V1A	0.123295	5.23906	24.077	24.2647	22.1422	22.1431
ATP6V1B1	-0.50554	0.144342	0.0555198	0.0427135	0.0699734	0.0691491
ATP6V1B1-AS1	0.841812	4.06961	1.49034	1.46743	0.877174	0.769755
ATP6V1B2	0.0404537	0.519063	28.1827	28.6948	27.8046	27.3812
ATP6V1C1	0.0759974	2.02591	19.3807	19.0445	18.2249	18.1485
ATP6V1C2	0.0851493	0.15327	0.671323	0.658457	0.597239	0.65344
ATP6V1D	0.0684648	0.445281	14.6307	15.1518	13.983	14.357
ATP6V1E1	0.043646	0.552658	21.7219	22.0249	20.7023	21.6464
ATP6V1E2	-0.157459	0.739533	5.49578	5.59907	5.92965	6.41679
ATP6V1F	0.0308607	0.312665	50.5671	51.8962	50.1544	49.9239
ATP6V1G1	-0.316052	34.4944	59.7299	60.4038	74.7743	74.4579
ATP6V1G2	0.237884	0.338516	0.0655937	0.0515347	0.0444484	0.0546196
ATP6V1G3	-1.72738	0.963673	0.0183069	0.0422525	0.113266	0.0870583
ATP6V1H	0.0634841	0.790099	8.92732	8.92652	8.50259	8.5452
ATP7A	0.0484074	0.237348	1.12219	1.16056	1.06056	1.14192
ATP7B	-0.382014	0.499048	0.0273758	0.0267077	0.0320964	0.0382148
ATP8A1	0.195858	69.7296	35.3786	35.5226	30.7543	31.0104
ATP8A2	-3.21598	1.11225	0.000627946	0.000621131	0.0051802	0.00639897
ATP8B1	-0.185136	1.47838	2.24278	2.44903	2.63599	2.68686
ATP8B2	-0.160254	0.473973	0.738347	0.751155	0.759699	0.9009
ATP8B3	0.552167	2.92902	0.250723	0.259555	0.18146	0.165834
ATP8B4	-0.854138	0.26594	0.00370204	0.00261561	0.00654423	0.00485036
ATP8B5P	0.216809	0.241101	0.170962	0.154142	0.13261	0.146465
ATP9A	-0.893529	1.04803	0.0344024	0.0494968	0.0886877	0.0669273
ATP9B	-0.170622	1.33197	1.67157	1.61633	1.91705	1.77572
ATPAF1	-0.138407	1.89105	4.4691	4.33876	4.89103	4.78248
ATPAF2	0.241219	2.5673	10.0984	10.1866	8.62885	8.49585
ATPIF1	0.194457	19.0767	54.2739	53.7995	46.9863	47.2513
ATR	-0.0472361	2.08042	33.0951	33.6322	34.5106	34.2884
ATRAID	0.306415	21.9578	26.9078	26.2981	21.69	21.2411
ATRIP	0.0441998	0.286282	3.45051	3.43504	3.36639	3.29694
ATRN	-0.451321	17.7264	1.1851	1.19775	1.63925	1.61177
ATRNL1	0.239763	8.23384	4.22199	4.20215	3.50999	3.60842
ATRX	-0.0960809	4.89976	7.11267	7.24183	7.62989	7.67974
ATXN1	4.78894	57.4974	0.251434	0.257568	0.0115489	0.00684774
ATXN10	0.0843095	4.65083	34.4773	33.6238	32.045	32.0487
ATXN1L	0.09663	2.14993	9.63504	9.80762	9.20848	8.93575
ATXN2	-0.198335	3.66447	1.72312	1.80546	2.05171	1.98833
ATXN2-AS	-0.468691	0.582232	1.37968	1.3647	2.05783	1.73231
ATXN2L	-0.060852	1.8121	5.12801	5.18963	5.34501	5.3936
ATXN3	0.0219417	0.173615	0.340497	0.335429	0.328756	0.335489
ATXN7	-0.153071	3.30049	2.19797	2.20974	2.39169	2.49847
ATXN7L1	0.296255	2.75601	0.756693	0.760481	0.639554	0.593388
ATXN7L2	-0.275256	2.23456	0.859312	0.859225	1.03299	1.04223
ATXN7L3	-0.0632037	1.79807	18.6682	18.8482	19.7787	19.3335
ATXN7L3B	-0.105335	5.17297	37.3738	37.1628	39.8232	40.1825
AUH	0.0950121	0.376716	1.41734	1.35917	1.28163	1.31208
AUNIP	0.08696	0.806942	9.32731	9.76587	8.8828	9.0545
AUP1	0.0794237	3.04973	30.2171	29.5695	28.2078	28.2515
AURKA	-0.0799639	3.26571	7.42662	7.59714	7.96576	7.88004
AURKAIP1	0.0664547	1.49845	43.5185	42.0235	41.2141	40.2981
AURKAPS1	0.0433053	0.0519977	1.73178	1.69769	1.68214	1.63869
AURKB	-0.123376	3.24172	4.90774	5.01119	5.43325	5.34803
AURKC	-0.688004	0.425325	0.058481	0.0578463	0.10642	0.0806272
AUTS2	0.348199	8.6359	1.93128	1.97192	1.58398	1.47582
AVEN	-0.120234	0.902135	12.2878	13.279	13.8352	13.8944
AVIL	-0.00227886	0.00299834	1.12963	1.21213	1.17308	1.1674
AVL9	-0.133241	7.54778	18.5817	18.495	20.5351	20.0409
AVPI1	-0.193861	0.227547	0.863487	0.964051	1.07555	1.0106
AVPR1B	0.955342	0.189767	0.0536424	0.0265301	0.0207431	0.0204988
AVPR2	-0.639515	3.99241	0.520795	0.527012	0.829061	0.799729
AXDND1	-0.326302	0.151498	0.0375092	0.0337292	0.042195	0.0469102
AXIN1	-0.0392478	0.265644	3.8136	3.6916	3.88531	3.80996
AXIN2	-0.374347	1.09162	0.49796	0.500904	0.644034	0.647915
AXL	-0.0476217	0.0106946	0.00790442	0.016506	0.00996219	0.0152148
AZGP1	-0.866446	0.417402	0.0847547	0.11178	0.23306	0.124754
AZGP1P1	0.826016	0.254885	0.0805773	0.13948	0.0623173	0.0615832
AZI2	0.00466229	0.0226139	5.13907	5.27183	5.09393	5.26053
AZIN1	0.125516	15.7493	27.0857	27.3829	25.1634	24.6592
AZIN1-AS1	0.409012	1.02028	1.6642	1.37411	0.981664	1.30065
AZIN2	-0.896524	0.146822	0.000861637	0.00127843	0.00222126	0.00175607
B2M	0.190258	51.2784	449.755	451.088	394.629	393.193
B3GALNT2	0.00656318	0.0280961	5.94021	5.95334	5.7835	6.02966
B3GALT2	-0.473008	1.28602	0.53247	0.437253	0.742456	0.600619
B3GALT4	-0.0583645	0.109957	0.591992	0.619028	0.608997	0.649222
B3GALT6	0.119362	2.67316	23.6608	23.2062	21.946	21.1065
B3GAT3	0.0887336	1.48389	6.43883	6.42335	6.10949	5.95933
B3GLCT	-1.31308	51.4428	1.54167	1.69841	3.89704	4.13651
B3GNT2	0.206243	7.19088	12.234	12.9668	10.838	10.9587
B3GNT4	-0.137771	0.142605	0.255513	0.225809	0.291556	0.2369
B3GNT5	-1.32532	6.35193	0.247818	0.17387	0.466518	0.587289
B3GNT7	0.760736	8.04661	1.7634	1.88691	0.997068	1.15233
B3GNT8	0.347618	0.231131	0.272917	0.282512	0.170165	0.265176
B3GNT9	0.461412	0.695796	0.421756	0.417179	0.303529	0.30443
B3GNTL1	0.135871	0.702078	0.823471	0.927014	0.812946	0.776928
B4GALNT1	0.789803	11.262	1.3881	1.19018	0.774218	0.713871
B4GALNT3	-2.91111	10.3248	0.0451656	0.0412389	0.351095	0.297394
B4GALT1	0.53336	52.4849	18.0519	18.4499	12.8324	12.3349
B4GALT1-AS1	0.462692	0.416958	0.207906	0.24194	0.134518	0.191092
B4GALT2	0.235366	3.31538	3.57096	3.44495	2.94268	3.00378
B4GALT3	-0.0478384	0.819358	14.0839	14.4583	14.6948	14.7457
B4GALT4	0.253847	1.79146	2.17158	2.19153	1.88164	1.7698
B4GALT4-AS1	-0.413078	0.0950062	0.0879635	0.217522	0.249442	0.156866
B4GALT5	-0.31602	32.4824	19.3832	19.7256	24.335	24.2458
B4GALT6	-0.698871	13.9396	0.735536	0.750598	1.15658	1.25036
B4GALT7	0.192918	2.94982	17.5677	16.9061	15.4614	14.6324
B4GAT1	0.104258	0.632562	9.41163	8.78125	8.30173	8.58429
B9D1	0.677718	3.93579	0.220592	0.216767	0.134245	0.138559
B9D2	-0.109531	0.180395	2.87916	2.8136	3.11201	3.01644
BAALC-AS1	0.361639	0.0585067	0.0656989	0.129972	0.135495	0.0167373
BAAT	0.247638	0.106628	0.0364213	0.0566123	0.0375569	0.0406492
BABAM1	0.0203566	0.227766	20.5096	20.1331	20.0367	19.9485
BABAM2	0.0125841	0.0405415	0.985253	0.895804	0.89901	0.961397
BACE1	0.015969	0.0280673	0.225614	0.265186	0.228599	0.255736
BACE1-AS	-0.0583942	0.0355608	0.879102	0.926582	0.951095	0.925205
BACE2	6.33557	112.173	0.552757	0.564969	0.00926064	0.00457578
BACH1	0.0671785	0.95322	4.63389	4.75477	4.54589	4.39655
BACH1-IT2	-0.261938	0.0911691	0.267189	0.190876	0.290827	0.257148
BACH1-IT3	-0.0484361	0.00587248	0.118751	0.0880965	0.153067	0.0605055
BACH2	-0.494529	inf	23.5407	23.5941	33.183	33.0786
BAD	0.312082	6.70957	11.7611	11.5636	9.36738	9.37877
BAG1	0.0709466	2.05121	7.99071	8.09014	7.64582	7.63011
BAG2	-0.000498496	0.00236766	23.6285	24.0829	23.3313	24.2908
BAG3	0.171457	0.449791	1.70834	1.89588	1.5611	1.63235
BAG4	-0.0365746	0.418075	9.31839	9.68918	9.73819	9.71549
BAG5	-0.106951	6.13412	10.762	10.6428	11.5379	11.4635
BAG6	-0.226555	39.8271	1.4452	1.44651	1.69892	1.67714
BAHCC1	0.15618	0.0501781	0.0254606	0.0183159	0.0250611	0.014152
BAHD1	-0.0947937	1.29839	3.50092	3.55765	3.77399	3.74764
BAIAP2	0.0703129	0.0811883	0.172293	0.209324	0.168009	0.194656
BAIAP2-AS1	0.515621	0.546304	0.188109	0.143538	0.121927	0.109537
BAIAP2L1	0.481697	0.559056	0.276089	0.208836	0.197614	0.148947
BAIAP2L2	0.304582	0.0754375	0.0334352	0.093705	0.0459703	0.056786
BAIAP3	-0.287479	0.379327	0.0406157	0.0483827	0.0621477	0.0462842
BAK1	-0.0376104	0.227222	17.6036	17.0742	18.2868	17.2304
BAMBI	-0.97283	0.288183	0.0276004	0.0409513	0.056922	0.0773458
BANF1	0.0167183	0.122511	31.2059	30.7886	30.4358	30.709
BANP	0.0563293	0.449661	2.55063	2.45057	2.42742	2.37172
BAP1	0.0238514	0.324518	38.8164	37.7033	37.5471	37.5515
BARD1	-0.0546412	1.37187	3.78263	3.87064	3.91016	4.02107
BARHL1	0.540916	0.0965162	0.0374215	0.0370153	0.0128628	0.0381337
BASP1	-0.280572	16.3998	16.9724	16.7458	20.3783	20.4881
BATF	0.853732	7.32916	5.82981	6.28052	2.84897	3.83567
BATF2	-0.855071	1.17536	0.0501384	0.0801138	0.113346	0.121836
BATF3	1.02717	4.40835	2.22202	1.92167	0.976623	1.05173
BAX	-0.00294207	0.0121581	6.64516	6.49247	6.66162	6.47421
BAZ1A	-0.0679396	3.75671	20.7422	20.3836	21.4817	21.5321
BAZ1B	-0.0915964	18.0464	101.027	100.715	106.949	107.544
BAZ2A	-0.111019	5.26802	4.78293	4.71216	5.12044	5.11163
BAZ2B	-0.198754	5.6311	1.25127	1.29087	1.44813	1.46317
BBC3	0.911647	8.24906	0.792518	0.767773	0.461912	0.365916
BBIP1	0.169494	1.16802	1.34688	1.4468	1.185	1.29349
BBOF1	0.609964	0.899287	0.314622	0.322594	0.166173	0.250233
BBS1	-0.222065	0.778656	1.29978	1.3172	1.5083	1.53745
BBS10	-0.100997	0.609784	4.77855	4.99894	5.36525	5.09929
BBS12	-0.160469	0.296045	0.384503	0.415545	0.444217	0.448054
BBS2	-0.136132	1.81207	11.2212	11.2926	12.705	11.9843
BBS4	0.144566	1.76501	2.19951	2.19975	1.98385	1.98723
BBS5	0.647163	0.262792	0.0641896	0.063493	0.0506167	0.0307818
BBS7	-0.0219457	0.109884	5.48137	5.73181	5.7074	5.65331
BBS9	0.412802	7.97741	0.258099	0.268752	0.200692	0.194221
BBX	0.0253782	0.212189	2.71729	2.74126	2.63102	2.72046
BCAP29	0.196538	6.22626	3.27938	3.40654	2.88301	2.9387
BCAP31	0.0938849	2.12003	13.0415	12.9094	12.3423	11.9212
BCAR1	-0.962755	23.1482	0.215808	0.204671	0.399649	0.418003
BCAR3	-1.81402	145.924	0.520354	0.51951	1.8267	1.82168
BCAR4	-1.21207	0.347439	0.0171358	0.00564993	0.0176701	0.0349238
BCAS1	0.0582487	0.0298926	0.0517164	0.0864766	0.0596777	0.0727772
BCAS2	0.062035	1.00828	60.2105	59.4481	57.0346	57.3353
BCAS3	0.212935	0.758584	0.318719	0.294545	0.257797	0.270099
BCAS4	-0.0660046	1.50182	29.5874	29.2043	30.1223	31.2841
BCAT1	0.0634084	21.443	33.8528	33.7181	32.3043	32.2197
BCAT2	0.0212152	0.119782	9.69838	9.20316	9.18524	9.39844
BCCIP	-0.0223724	0.260582	22.5345	22.1683	22.5908	22.7103
BCDIN3D	0.221229	1.18594	2.51253	2.57208	2.14586	2.2063
BCDIN3D-AS1	-0.0871336	0.0924286	0.215771	0.21343	0.228811	0.226116
BCHE	4.37901	11.0834	0.17691	0.167036	0.0124381	0.00409721
BCKDHA	0.272375	13.7522	18.5584	18.4769	15.3666	15.2302
BCKDHB	0.111714	2.41796	5.2486	5.32308	4.78832	4.97394
BCKDK	0.0224008	0.123197	6.49841	6.47344	6.5111	6.23356
BCL10	-0.01371	0.0695594	6.98953	6.86036	7.06852	6.88325
BCL11A	-0.0697192	1.41136	6.9643	7.12847	7.33641	7.4219
BCL11B	-1.36476	0.234031	0.0014972	0	0.00231583	0.0015257
BCL2	1.05479	20.5617	1.21174	1.26272	0.630334	0.558415
BCL2A1	0.849396	3.48342	1.13871	1.21002	0.670978	0.62992
BCL2L1	0.115446	2.49904	2.75431	2.86981	2.57508	2.60528
BCL2L11	-0.558411	31.2074	0.331291	0.341092	0.494787	0.493262
BCL2L12	0.104146	1.50466	2.11823	2.13562	1.97676	1.97222
BCL2L13	0.0376849	0.461982	1.36723	1.40042	1.33856	1.35186
BCL2L15	-0.005451	0.0040564	0.203136	0.295487	0.224256	0.275191
BCL2L2	0.0380017	0.125316	2.29139	2.17954	2.09422	2.25046
BCL3	0.918139	6.94791	2.3302	2.07062	1.25424	1.06985
BCL6	-0.158418	32.2297	40.1288	39.3368	44.4482	44.0458
BCL7A	0.0610725	3.15071	35.5428	36.2829	34.3086	34.3906
BCL7B	-0.0469852	0.707929	12.7384	12.7653	13.1664	13.1242
BCL7C	-0.335151	4.47144	4.02683	3.88345	5.08358	4.87361
BCL9	-0.0226928	0.0660015	2.41459	2.34848	2.37697	2.45076
BCL9L	-0.764522	6.54158	0.463942	0.376851	0.689098	0.735772
BCLAF1	-0.012186	0.302264	16.1554	15.9809	16.0963	16.2412
BCLAF3	-0.00716847	0.0142771	1.62158	1.54779	1.60412	1.57402
BCO2	-0.531173	0.440807	0.0346465	0.021419	0.0419789	0.0388365
BCOR	-0.192208	10.6233	3.2983	3.30918	3.76828	3.76436
BCORL1	0.24475	0.400809	0.15531	0.126801	0.117784	0.119747
BCR	-0.392164	133.183	16.5211	16.4079	21.5988	21.5213
BCRP2	0.0309337	0.00792424	0.0918176	0.100912	0.0946805	0.0935652
BCRP3	-0.184896	0.0294063	0.0334981	0.0497018	0.0431782	0.0512035
BCS1L	-0.04749	0.39477	4.19247	4.1369	4.27188	4.31721
BDH1	-0.118294	2.32499	5.87265	5.54529	6.27801	6.08834
BDH2	-0.119036	1.12321	7.9412	8.19812	8.7611	8.72859
BDNF	-1.37395	0.240571	0.000342582	0.000338864	0.00158969	0.000174551
BDNF-AS	0.176447	0.0409924	0.0167431	0.0124211	0.0129489	0.0127964
BDP1	-0.111599	8.30646	19.0468	18.7188	20.1966	20.5157
BECN1	0.108534	2.1891	7.61482	7.79602	7.15762	7.10556
BEGAIN	1.75966	0.450677	0.0131628	0.01736	0.00452442	0.00447112
BEND3	-0.196409	5.7432	7.09471	6.89063	7.9121	8.0771
BEND3P3	0.202833	0.604894	0.758368	0.797765	0.678573	0.67058
BEND4	-0.214942	18.7411	7.55025	7.29229	8.6441	8.54502
BEND6	0.0523717	0.064294	0.487221	0.413351	0.450239	0.416292
BEST1	0.127825	0.115026	0.0905605	0.0895777	0.0795152	0.0849745
BEST2	-0.238935	0.0305071	0.0124935	0.0308948	0.0128831	0.0381939
BEST3	0.0814902	2.20855	7.65664	8.02652	7.29658	7.49297
BEST4	-0.0843104	0.0904311	0.779533	0.962434	0.915321	0.927732
BET1	-0.081658	1.13933	5.23774	5.14071	5.43913	5.51931
BET1L	0.0627746	0.541032	7.03151	6.79014	6.66228	6.54181
BFAR	0.0149252	0.113728	13.528	13.6307	13.5178	13.3033
BFSP1	0.960518	1.98658	0.106862	0.0935909	0.0631322	0.0397018
BFSP2	-0.134242	0.249831	2.08003	1.88538	2.21508	2.12733
BFSP2-AS1	0.368941	1.12343	0.839066	0.835996	0.566332	0.727558
BGLAP	0.873384	0.378473	0.289244	0.254316	0.0828508	0.212875
BHLHA15	2.05352	13.5012	3.41935	3.04901	0.920572	0.635093
BHLHE23	-1.36736	0.244344	0.0112453	0.0333699	0.0231919	0.091675
BHMT2	0.145061	0.0183855	0.00932293	0.00922175	0.00961362	0.00712528
BICC1	-1.72177	2.53054	0.026147	0.0301737	0.0943678	0.0910358
BICD1	-0.0859467	0.477052	2.58636	2.59085	2.67058	2.81212
BICD2	-0.298215	106.695	29.6123	29.5381	36.4928	36.0816
BICDL1	0.031782	0.18056	2.85348	2.80483	2.73866	2.78408
BICDL2	-0.832943	0.626064	0.0922592	0.143405	0.23784	0.181315
BICRA	-0.262568	0.864281	0.657652	0.595108	0.768008	0.731478
BICRAL	-0.138273	3.84621	4.90031	4.79935	5.2376	5.41382
BID	-0.0652908	0.800334	3.50541	3.47516	3.67076	3.61708
BIK	-0.102536	4.02172	124.839	123.248	131.495	134.274
BIN1	3.7555	10.2263	0.0895405	0.079588	0.00355125	0.00893305
BIN2	0.675994	13.806	1.36938	1.36572	0.848803	0.859325
BIN3	0.0778844	0.528066	16.6432	16.437	16.4559	14.8202
BIN3-IT1	0.0882466	0.0631535	0.549174	0.524042	0.586284	0.421366
BIRC2	0.0503587	1.13448	12.6582	12.5702	12.1102	12.1992
BIRC3	0.289331	142.174	48.8193	49.0228	40.0595	39.8287
BIRC5	0.0180936	0.313312	30.5065	29.7329	29.5893	29.7676
BIRC6	0.0127488	0.398812	39.4678	39.4326	38.7184	39.3154
BIRC6-AS2	-0.625459	1.34197	1.49958	1.48331	2.4031	2.18894
BISPR	-0.0309467	0.0996076	4.16451	4.03939	4.26552	4.09809
BIVM	0.860527	0.352273	0.0269697	0.0233423	0.0139053	0.0137415
BLACAT1	-1.44118	0.955897	0.036343	0.0359486	0.131167	0.0648108
BLCAP	-0.000728973	0.00410575	4.18192	4.1945	4.16879	4.1935
BLK	-0.0427321	1.45913	45.8586	45.2587	47.0971	46.5543
BLM	-0.0121101	0.124923	7.39094	7.47177	7.41001	7.54505
BLMH	-0.115757	4.85715	42.4775	42.2863	45.6303	46.0129
BLNK	0.0707052	1.27586	5.83403	5.75141	5.58722	5.42025
BLOC1S1	0.0753552	0.341346	6.47409	5.99153	5.90776	5.89691
BLOC1S2	0.0649723	0.82169	3.54867	3.64282	3.44469	3.41531
BLOC1S3	-0.0137767	0.0297613	4.32236	3.94553	4.2781	4.05077
BLOC1S4	0.0722823	0.331023	11.2371	11.0315	10.9455	10.19
BLOC1S5	-0.304269	0.0639932	0.0177904	0.00439933	0.00917255	0.018129
BLOC1S6	-0.485234	111.133	2.72239	2.81441	3.89817	3.83574
BLVRB	0.504011	35.2506	64.1617	63.1479	45.0675	44.5082
BLZF1	0.299945	6.15241	3.95596	4.02691	3.14806	3.3218
BMF	0.0790139	0.358584	0.940522	0.86553	0.84963	0.856307
BMI1	0.5825	2.25674	0.756949	0.824295	0.551399	0.502443
BMP1	0.347535	0.772331	0.165484	0.176211	0.145467	0.122559
BMP10	-1.62896	0.33205	0.0077274	0	0.0159367	0.00787447
BMP2K	0.212713	15.0131	18.7417	19.4044	16.5166	16.3295
BMP3	-0.354848	67.9432	26.3718	26.1401	33.177	33.8291
BMP6	-0.799707	43.8549	5.02734	5.53567	9.31126	9.03818
BMP7	-0.147835	17.1423	60.3138	61.5012	67.8515	66.8177
BMP7-AS1	-0.493724	0.462612	0.376987	0.559343	0.619556	0.696293
BMP8A	0.0490559	0.093858	1.05246	1.03686	1.05041	0.964814
BMP8B	0.0237957	0.0249065	0.451327	0.517174	0.490831	0.459917
BMPR1A	-0.55292	14.5488	3.77709	3.68067	5.5534	5.36371
BMPR1B	-1.11549	0.662035	0.00762375	0.00323186	0.0123537	0.0110984
BMPR2	0.843889	83.4571	4.31687	4.47655	2.45577	2.43287
BMS1	0.0140363	0.168958	19.376	19.5346	19.0799	19.3693
BMS1P14	-0.284161	0.819088	0.0963659	0.102039	0.120821	0.120263
BMS1P20	-0.0686824	0.961737	29.0821	28.8428	30.5154	30.1015
BMS1P4	0.159495	0.937414	6.17528	6.28313	5.70779	5.42313
BMS1P5	0.236807	0.171059	0.0773026	0.0792441	0.0681183	0.0644513
BMS1P6	0.664509	0.866707	0.0747418	0.0902205	0.0483335	0.0555096
BMT2	0.166241	2.80674	9.83608	10.6393	9.07904	9.12884
BNC2	1.76292	0.645889	0.0037044	0.00274815	0.000636651	0.0012583
BNIP1	-0.00917598	0.0249418	3.00046	2.97951	3.05286	2.9523
BNIP2	-0.0725703	4.05606	11.9681	11.8876	12.576	12.4556
BNIP3	0.27061	56.1434	154.048	154.527	127.722	127.519
BNIP3L	0.267003	46.8166	34.85	34.1565	28.4061	28.8141
BNIPL	-0.552628	1.06547	0.180004	0.221919	0.298601	0.289767
BOC	0.100168	0.00658924	0	0.0108741	0.00340086	0.00672159
BOD1	-0.0825833	0.911753	11.0032	10.8454	11.7808	11.3051
BOD1L1	0.101098	7.46795	22.2573	21.9688	20.5153	20.6269
BOK	-0.173838	0.0439314	0.0359578	0.0622433	0.0556185	0.0549634
BOLA1	0.429844	1.75041	1.17294	1.19136	0.909167	0.842304
BOLA2-SMG1P6	0.0475924	0.0641595	0.254581	0.265913	0.26056	0.242003
BOLA3	0.479562	22.6111	39.2511	38.4421	28.2417	27.359
BOLA3-AS1	-0.0830403	0.0999875	0.272009	0.237404	0.247492	0.290774
BOLL	0.606218	0.172333	0.0116971	0.00661153	0.00689248	0.00510846
BOP1	0.138586	7.5811	58.346	58.6774	53.9842	52.0934
BORA	0.00640513	0.0529464	12.9333	12.8533	12.7511	12.8647
BORCS5	0.121336	0.886602	1.00373	1.02428	0.933428	0.926967
BORCS6	0.100929	0.387248	5.61164	6.02968	5.60738	5.22504
BORCS7	-0.187435	1.89967	3.96713	4.01372	4.55508	4.51333
BORCS8	0.0096714	0.0215312	3.9204	3.77327	3.90006	3.72565
BPGM	0.207572	4.46149	6.24021	6.40794	5.44661	5.48282
BPHL	-0.322301	2.23771	0.823671	0.779563	1.01739	0.982761
BPNT1	-0.0651548	1.95007	15.6669	15.5388	16.0149	16.5596
BPTF	-0.433032	146.349	11.1512	11.4093	15.0142	15.3772
BRAF	0.255441	8.84818	17.6585	17.1941	14.8341	14.2998
BRAP	-0.0576243	0.69586	14.3156	14.3879	14.7954	15.0121
BRAT1	0.0488404	0.814494	7.89849	7.92774	7.6643	7.60188
BRCA1	0.00669198	0.0747465	5.13701	5.16244	5.09124	5.13806
BRCA2	0.104147	3.15575	8.13974	8.221	7.55807	7.6299
BRCAT54	0.262933	0.385625	0.350039	0.29214	0.295531	0.238544
BRCC3	0.00474834	0.0216377	5.28211	5.36809	5.39273	5.19984
BRD1	-0.143021	4.17011	1.91242	1.9555	2.12924	2.13251
BRD2	-0.133052	20.9036	2.53067	2.51872	2.77949	2.74568
BRD3	0.408126	5.6692	2.74333	2.54644	2.08191	1.89597
BRD4	-0.0734801	1.33221	5.54821	5.67378	5.85471	5.9279
BRD7	0.0201787	0.262564	31.8274	31.3078	31.3542	30.7685
BRD7P3	-0.251619	0.187261	0.231709	0.238744	0.243911	0.314825
BRD8	0.136089	4.81317	4.46507	4.53355	4.11157	4.05935
BRD9	-0.0011141	0.00596881	5.93595	5.94807	5.89805	5.969
BREA2	-1.01128	1.09869	0.261252	0.24667	0.391851	0.629257
BRE-AS1	-0.340528	0.300619	0.458387	0.297552	0.516993	0.437917
BRF1	-0.0261085	0.135796	1.57078	1.56082	1.57656	1.60517
BRF2	0.0918432	0.461982	8.14478	8.86262	8.1104	7.81479
BRI3	0.0454892	0.167672	10.7068	10.9863	10.4878	10.4865
BRI3BP	0.078699	2.27341	92.2869	93.3309	86.7017	88.6746
BRICD5	-0.0900481	0.244094	6.42992	6.85291	7.00075	7.10718
BRIP1	-0.257184	20.523	11.0164	11.2199	13.2104	13.3073
BRIX1	0.00781877	0.064294	88.0617	89.6915	87.4917	88.9138
BRK1	0.0853277	2.28147	83.7937	84.0159	78.2951	79.5289
BRMS1	0.0604983	1.05529	31.4184	31.1156	30.2379	29.5979
BRMS1L	-0.27881	2.4533	3.81073	3.7283	4.41955	4.70598
BROX	-0.0342231	0.369748	4.78651	4.92583	4.94179	4.9821
BRPF1	-0.020809	0.194687	4.78049	4.85074	4.93086	4.81932
BRPF3	-0.536993	19.4409	3.07646	3.15447	4.5049	4.51627
BRSK1	0.26203	4.55394	7.99299	7.80651	6.51459	6.6315
BRSK2	-1.17148	0.404994	0.00139652	0.00368364	0.00288013	0.0085386
BRWD1	-0.00415965	0.0528738	8.71982	8.71435	8.69858	8.74757
BRWD1-AS1	0.0612343	0.0183855	0.362466	0.341459	0.444962	0.228654
BRWD1-IT2	0.424318	0.960254	2.55644	1.82952	1.62785	1.63269
BRWD3	-0.114599	4.65128	8.71913	8.9469	9.45001	9.63476
BSCL2	-0.284994	0.46268	0.169344	0.150626	0.203051	0.185944
BSDC1	0.108221	1.27763	1.83541	1.74707	1.62275	1.69329
BSG	0.148239	11.0097	17.9008	17.8613	16.0856	16.1136
BSN	-0.0901947	0.0826232	0.109465	0.085443	0.119789	0.0872657
BSN-AS2	0.42883	0.166055	0.0639427	0.112944	0.075356	0.0558512
BSPRY	0.830175	66.7545	6.07746	6.1015	3.42204	3.41322
BST1	1.45441	26.9846	4.94055	4.71924	1.78144	1.73578
BST2	0.0425653	0.51976	76.7898	77.4624	73.9431	75.4946
BTAF1	0.173145	29.0915	47.2492	48.0504	41.9193	42.4178
BTBD1	-0.0309505	1.01805	43.4906	43.6642	44.5064	44.3445
BTBD10	0.0510043	0.497384	7.26703	7.09169	6.85225	6.97683
BTBD16	0.761065	0.271502	0.0573829	0.0315334	0.0328734	0.0194917
BTBD18	-0.240712	0.550966	0.85017	0.817798	0.932979	1.03326
BTBD19	0.870655	1.03222	0.334081	0.435601	0.180079	0.239856
BTBD2	0.273963	11.8336	24.9563	23.8121	20.459	19.7866
BTBD6	-1.06698	17.6254	1.89929	2.08611	3.91703	4.41428
BTBD7	-0.126258	3.00742	3.52411	3.68643	4.00674	3.84666
BTBD8	0.0609774	0.0792083	2.2049	1.91141	2.05225	1.88501
BTBD9	0.0364866	0.0864049	0.262706	0.276751	0.252932	0.271884
BTBD9-AS1	0.12391	0.0163948	0.0730774	0.0903554	0.056517	0.0930854
BTD	0.0251678	0.0232561	0.0839407	0.0886022	0.0836534	0.0855384
BTF3	-0.0510149	3.5418	172.778	173.755	178.542	179.678
BTF3L4	-0.0780305	1.43436	5.13856	5.2059	5.38135	5.51396
BTG1	-0.000569343	0.00406775	22.0976	21.7674	21.4961	22.288
BTG2	-0.054737	2.19785	79.8466	78.9064	81.8255	82.702
BTG3	-0.0234136	0.0817112	6.37237	6.37265	6.58313	6.34264
BTK	-0.0041324	0.0395059	22.1785	22.2729	21.9837	22.4968
BTLA	-1.28211	44.0187	0.900516	0.920684	2.19663	2.22281
BTN1A1	-0.938005	0.640961	0.0668078	0.049562	0.0904192	0.131904
BTN2A1	-0.0862007	0.628769	2.52961	2.46705	2.75372	2.53933
BTN2A2	0.352049	7.88525	1.37465	1.48667	1.1107	1.12624
BTN2A3P	0.280457	0.790234	1.73618	1.37577	1.2364	1.31959
BTN3A1	0.173077	2.08073	1.6497	1.63099	1.47538	1.42815
BTN3A2	0.115764	3.17566	4.19614	4.25167	3.88995	3.88952
BTN3A3	0.178021	1.63782	2.35713	2.20313	1.97693	2.04478
BTNL2	0.312514	0.1886	0.0443836	0.0360971	0.0254264	0.0391979
BTRC	0.579289	41.9214	2.72445	2.77463	1.82644	1.84601
BUB1	0.0196991	0.508247	30.13	30.234	29.7242	29.6913
BUB1B	-0.110755	10.8791	70.7555	69.8108	75.8197	75.6294
BUB1B-PAK6	-0.518191	0.157869	0.0186178	0.00920789	0.0175985	0.0221342
BUB3	-0.0312555	1.28613	83.7075	84.4274	85.9003	85.5436
BUD13	0.078527	1.11494	13.9168	13.7068	13.0249	13.0777
BUD23	-0.00249351	0.0157901	18.9536	18.4135	18.7239	18.6254
BUD31	0.0720687	1.14669	64.8377	65.9804	62.6438	61.5324
BYSL	-0.0437031	0.460565	31.5651	31.4298	32.0491	32.7395
BZW1	0.0189744	0.412712	10.063	10.1937	9.95709	9.99146
BZW2	-0.100337	5.76751	31.7908	31.7852	34.333	33.6746
C10orf105	0.264739	0.391241	0.177407	0.185298	0.130487	0.170669
C10orf111	-1.10402	0.79269	0.0485546	0.130361	0.207427	0.17671
C10orf128	5.20052	2.27946	0.022199	0.0301924	0	0.00141384
C10orf25	-0.302927	0.270247	0.154879	0.164983	0.184279	0.209425
C10orf71	1.53487	0.596455	0.0224779	0.0311275	0.0139073	0.00458115
C10orf76	-0.0323645	0.137175	6.19253	6.4424	6.19029	6.70238
C10orf88	-0.0270869	0.0970203	6.59855	6.77475	6.55788	7.03835
C10orf91	0.197837	0.0744827	0.371601	0.351587	0.283226	0.345746
C10orf95	0.00777245	0.00596881	1.38421	1.22506	1.35225	1.23733
C11orf1	0.190625	1.84418	9.16992	9.53603	8.25202	8.10364
C11orf16	0.730766	0.396588	0.0866794	0.251092	0.11492	0.0883292
C11orf21	-2.04758	1.2322	0.00563401	0.00557286	0.0261435	0.0200943
C11orf24	-0.228569	8.46214	16.1374	15.734	18.3565	18.9027
C11orf42	-0.00387474	0.00194343	0.583337	0.47397	0.601526	0.456445
C11orf45	3.97184	14.7366	0.117597	0.130453	0.00906643	0.00671972
C11orf49	-0.0180678	0.0817789	2.79491	2.71778	2.75544	2.81426
C11orf53	-0.429185	0.0789757	0.019726	0.0780479	0.0711939	0.0603045
C11orf54	-0.0715372	0.73869	1.09414	1.02945	1.10646	1.12007
C11orf57	0.0193116	0.195718	4.30877	4.25517	4.23977	4.19184
C11orf58	0.0264805	0.475917	45.1313	44.5026	43.5626	44.2459
C11orf65	-0.078195	0.0662788	0.512104	0.49769	0.443137	0.620382
C11orf68	0.172304	1.20681	4.65989	4.46575	3.91505	4.16474
C11orf71	-0.0975962	0.438334	4.27996	4.46894	4.69829	4.64294
C11orf72	-0.0542124	0.00886428	0.0195636	0.077405	0.0806942	0.0199359
C11orf80	0.032326	0.213768	10.1826	10.5721	10.2139	10.0376
C11orf84	-0.141062	3.55707	28.9163	27.955	30.8544	31.7177
C11orf94	0.00450024	0.00356507	3.25345	3.25032	3.1536	3.31537
C11orf95	-0.131991	2.12076	6.76051	6.79666	7.55316	7.27107
C11orf98	0.0776136	0.0600322	0.89839	0.686676	0.7327	0.765682
C12orf10	0.0538113	0.422428	32.6761	32.2048	31.5561	30.8137
C12orf29	-0.0917888	1.07743	14.1242	15.1058	15.5299	15.5537
C12orf4	0.152703	2.70042	1.0993	1.09289	0.968448	0.999173
C12orf40	0.810803	0.315607	0.0236838	0.021865	0.0146534	0.0112628
C12orf42	-2.74317	0.673986	0.0029412	0	0.00909871	0.0104901
C12orf43	0.0107746	0.0406203	1.35535	1.32349	1.3243	1.32873
C12orf45	0.0658968	0.406188	42.2545	40.7886	39.1732	39.9845
C12orf49	-0.0239255	0.504954	42.0188	41.8546	42.8343	42.2563
C12orf57	0.357563	18.2646	12.0502	12.0656	9.37587	9.40484
C12orf60	0.236165	0.572446	2.82086	2.8425	2.40767	2.39007
C12orf65	0.0700008	0.556434	6.26232	6.20793	5.87503	5.9783
C12orf66	-0.078999	0.555926	3.24102	3.40706	3.56762	3.43987
C12orf71	0.312965	0.0447084	0.0369556	0.0731091	0.0508106	0.037659
C12orf73	0.0191466	0.0507053	7.95419	7.81922	8.02107	7.51127
C12orf75	0.22567	9.39135	48.9847	50.3187	41.8143	42.9233
C12orf76	-0.320136	5.78817	8.86045	8.75219	11.1734	10.7676
C12orf77	0.292092	4.81086	14.4947	14.5325	11.4317	12.2217
C14orf119	0.0789374	0.922407	15.8294	16.0647	15.3785	14.7532
C14orf159	0.027258	0.138013	1.44832	1.48535	1.48611	1.38661
C14orf166	0.087802	4.24199	163.473	162.712	152.591	153.66
C14orf178	-0.46247	0.386964	0.41045	0.313724	0.615634	0.380239
C14orf2	0.0348458	0.410685	57.5531	56.3953	56.1297	54.8573
C14orf28	0.0242372	0.033588	1.39177	1.40501	1.36763	1.37655
C14orf39	-2.04662	0.778656	0.0129782	0.00855825	0.0490706	0.0396757
C14orf79	-0.193855	0.253845	0.83787	0.735306	0.902973	0.892336
C14orf80	0.0300123	0.234008	8.62453	8.68031	8.50414	8.40771
C14orf93	-0.111068	0.636256	1.18979	1.21665	1.24291	1.35026
C15orf39	0.076215	0.673767	8.77747	8.23615	8.063	8.03913
C15orf40	-0.0830682	0.516065	3.26661	3.16031	3.50896	3.28428
C15orf41	0.013943	0.0372482	0.599766	0.614795	0.612344	0.587985
C15orf52	-0.462454	0.299656	0.0536121	0.059659	0.0829256	0.0728433
C15orf61	0.21125	1.089	6.36394	6.27674	5.51277	5.38242
C15orf62	-0.194839	0.87703	2.60975	2.70413	3.01583	3.05323
C15orf65	0.783471	1.55984	1.31418	1.59748	0.865338	0.822875
C16orf45	-0.224699	0.0862692	0.055634	0.0495272	0.0602371	0.0623622
C16orf46	-0.00281208	0.00177595	0.242143	0.316026	0.235821	0.322148
C16orf52	-0.117673	0.534585	2.38358	2.363	2.52962	2.60886
C16orf54	0.724692	22.4168	7.13695	7.3176	4.28634	4.44111
C16orf58	0.0810416	0.717354	12.2144	11.7378	11.292	11.3016
C16orf59	-0.0313717	0.174756	21.3428	21.4742	21.4634	22.1978
C16orf62	-0.0558443	0.242313	6.42211	6.43597	6.35443	6.98128
C16orf70	-0.0473664	0.211917	1.4549	1.47005	1.54996	1.46623
C16orf71	-0.190238	0.143797	0.246663	0.257057	0.295233	0.278289
C16orf72	0.016035	0.167091	31.0335	31.9881	31.1571	31.0336
C16orf74	3.03273	83.9775	10.0134	10.5624	1.43982	1.07053
C16orf86	0.220134	0.393624	1.8681	1.78282	1.54882	1.5784
C16orf87	-0.0905484	1.67667	1.31991	1.30968	1.42457	1.36934
C16orf91	-0.0116888	0.0330681	17.3868	18.6784	18.1045	18.1764
C16orf95	0.0271109	0.0559314	2.48423	2.71213	2.51014	2.57854
C17orf100	-0.157122	0.196398	1.23556	1.12407	1.10106	1.52332
C17orf107	0.495033	0.109405	0.0347112	0.0267046	0.0198853	0.0235812
C17orf50	-0.097857	0.0365203	0.404307	0.205673	0.297795	0.353145
C17orf51	-0.750776	34.5711	1.9982	1.97057	3.33767	3.32589
C17orf53	0.235184	3.56304	2.19395	2.15899	1.8357	1.85428
C17orf58	-0.681756	10.2926	2.26912	2.13818	3.32098	3.73215
C17orf62	-0.019245	0.319716	8.02222	8.02037	8.18602	8.03682
C17orf67	0.214804	0.962564	3.63547	3.43439	3.1531	2.92567
C17orf75	0.0296308	0.202582	10.3118	10.4645	10.0871	10.2223
C17orf78	-0.68359	0.901744	0.115968	0.199921	0.300667	0.205962
C17orf80	0.0819013	1.53414	2.89923	2.91588	2.70182	2.7802
C17orf97	0.591085	0.204647	0.0969658	0.083125	0.0599935	0.0592868
C17orf98	0.41458	0.0694321	0.126555	0.104318	0.0652505	0.10747
C17orf99	-0.678055	0.166007	0.0437791	0.075782	0.124146	0.0669185
C18orf21	0.0782245	0.56386	6.58885	6.87189	6.42167	6.30148
C18orf25	-0.0242841	0.265267	9.0274	9.10992	9.14695	9.25782
C18orf32	0.667424	1.3913	0.40139	0.543112	0.242096	0.351148
C18orf54	-0.0327114	0.319199	2.7086	2.69993	2.74552	2.77486
C18orf61	0.932875	7.02555	1.39449	1.35767	0.718985	0.719452
C18orf65	0.319857	0.7095	1.05976	1.24658	0.933316	0.910647
C18orf8	0.000879678	0.00435427	5.53982	5.65635	5.46903	5.69555
C19orf12	0.167088	2.12677	0.810871	0.81465	0.716594	0.727972
C19orf24	0.234609	5.1065	38.1946	39.0179	33.4688	32.0164
C19orf25	-0.0828775	1.02329	19.4406	19.1254	20.1825	20.5729
C19orf35	0.22666	0.170954	0.249904	0.334167	0.257696	0.240513
C19orf38	-0.195827	0.360015	2.04137	2.1712	2.354	2.46048
C19orf44	-0.0434674	0.0766699	0.911473	0.966684	0.89259	1.03857
C19orf47	0.0752842	0.606154	4.91292	5.08606	4.73907	4.73106
C19orf48	-0.052937	1.77372	10.4983	10.4171	10.7914	10.858
C19orf53	0.0880509	1.44868	66.7547	64.9542	61.9836	61.6542
C19orf54	-0.0268614	0.0526004	3.01308	2.66395	3.01342	2.75766
C19orf57	-0.767215	0.292379	0.00698443	0.006141	0.0128039	0.00948982
C19orf60	0.248425	8.7838	30.7807	30.3002	25.3415	25.9627
C19orf66	-0.0230478	0.05592	3.11628	2.72548	3.00079	2.92166
C19orf67	0.0487533	0.0187041	0.304912	0.211937	0.254934	0.243534
C19orf68	-0.0405797	0.0734207	1.48107	1.55349	1.54434	1.57004
C19orf70	0.0194854	0.0875567	17.8275	17.3279	17.9169	16.6928
C19orf71	-0.180138	0.800334	10.8603	10.3374	12.0985	11.8652
C19orf73	0.579765	0.764377	1.18271	1.07502	0.741643	0.76548
C1D	-0.122885	1.80068	7.2709	7.16818	7.82273	7.86547
C1GALT1	0.0316056	0.265267	9.88606	10.1104	9.89372	9.62768
C1GALT1C1	0.0524467	0.252201	5.97515	5.83266	5.63198	5.72894
C1orf109	-0.132767	3.12767	1.01675	1.02398	1.11073	1.12181
C1orf112	-0.0979434	1.96455	5.67226	5.73519	6.01135	6.17051
C1orf116	-0.308685	0.0549645	0.00659055	0.00434602	0.00679605	0.00671599
C1orf122	-0.0395965	0.159133	7.81368	7.74299	7.8023	8.1514
C1orf123	-0.0464076	0.285718	8.38391	8.24228	8.49354	8.63805
C1orf131	-0.0478651	0.291935	11.6517	12.5604	12.2581	12.7165
C1orf132	-0.460314	3.08175	0.943167	0.957482	1.31099	1.29835
C1orf146	-0.258838	0.107962	0.302854	0.394168	0.295861	0.536022
C1orf159	0.0100269	0.0266781	3.12633	3.23475	3.25707	3.04677
C1orf162	0.138963	0.0705411	0.19635	0.141618	0.164509	0.141728
C1orf167	-0.771368	0.413947	0.033192	0.0328318	0.0447583	0.0676475
C1orf174	-0.0224084	0.111038	21.5566	20.7149	21.2488	21.5883
C1orf186	0.301369	2.34878	5.62617	5.72796	4.57632	4.61724
C1orf189	-2.04598	1.05412	0.084701	0.0335127	0.279494	0.207151
C1orf194	0.39899	0.413892	1.04684	1.21345	0.910811	0.800073
C1orf198	-0.48078	1.2584	0.123999	0.139571	0.179673	0.187361
C1orf21	-1.36998	0.260549	0.00230539	0.00228037	0.00713183	0.00469854
C1orf216	-0.171561	0.912122	1.6033	1.52912	1.73786	1.78215
C1orf220	-0.303245	2.2585	2.8096	3.01641	3.51566	3.6576
C1orf226	1.48851	0.645773	0.0441972	0.0230092	0.0191896	0.00474088
C1orf228	-0.118822	0.0939241	0.518159	0.589767	0.60019	0.600353
C1orf229	1.12633	0.314167	0.0526144	0.0416347	0.010851	0.0321695
C1orf27	0.0746958	0.54082	2.60915	2.7046	2.43777	2.59663
C1orf35	-0.18307	2.8199	8.65605	9.12515	9.97439	10.1689
C1orf43	0.0216226	0.407646	14.3881	14.4122	14.1073	14.2024
C1orf50	0.0761003	0.270538	6.33961	7.14021	6.33801	6.42216
C1orf52	0.106222	1.43865	6.63082	6.55886	5.95132	6.27451
C1orf53	-0.14573	0.238946	3.56252	3.52386	3.85368	3.96845
C1orf54	0.612314	3.28613	1.34117	1.44354	0.937622	0.880248
C1orf56	-0.518089	1.35597	0.864376	0.966864	1.34116	1.27597
C1orf61	-0.0467355	0.00574335	0.00573731	0.00227002	0.0059162	0.0023386
C1orf74	0.0811793	0.496626	4.47793	4.47532	4.14066	4.30383
C1QBP	0.0305526	0.425667	107.122	104.01	102.747	103.503
C1QL3	-0.0404472	0.0742592	2.33116	2.1974	2.27603	2.37067
C1QL4	1.03385	0.655932	0.247517	0.0911	0.0474856	0.117316
C1QTNF12	1.08008	0.82551	0.240944	0.431262	0.130144	0.18707
C1QTNF3	-0.0224877	0.0404495	0.529475	0.553886	0.551224	0.546802
C1QTNF3-AMACR	-0.151955	0.0411541	0.0560301	0.0293411	0.0475811	0.0470206
C1QTNF4	0.959342	0.179324	0.0841011	0.0166377	0.0173447	0.0342807
C1QTNF6	1.27942	0.508642	0.0388837	0.0384617	0.00267307	0.0290574
C1QTNF7	1.04824	0.460566	0.0133708	0.0149891	0.00367673	0.0099919
C1QTNF9	-0.844807	0.090151	0.0170466	0	0.0109863	0.0195424
C1R	1.6462	0.345714	0.0210458	0.0468391	0.021702	0
C1RL	0.350071	1.06141	0.266892	0.313161	0.228416	0.225726
C1RL-AS1	0.231548	1.9012	2.75655	2.48323	2.25119	2.20166
C1S	0.0863265	0.0285084	0.0335331	0.0331691	0.0210479	0.0415998
C2	-0.28988	0.144752	0.00425234	0.00228336	0.00375851	0.00420947
C20orf144	-0.230301	0.201354	1.40076	1.3442	1.37976	1.83221
C20orf173	-0.0108047	0.0037527	0.093889	0.0631516	0.0774532	0.0803678
C20orf194	-0.821811	4.58902	0.267846	0.26323	0.422315	0.514191
C20orf196	-0.0485664	0.191612	3.49596	3.53391	3.40612	3.84776
C20orf203	0.206283	0.0939241	0.0582454	0.0852677	0.0576591	0.0664765
C20orf204	-0.288548	0.505875	0.655761	0.560394	0.79121	0.690972
C20orf24	0.36821	8.32315	5.48245	5.31206	4.09554	4.24858
C20orf27	0.0709049	1.39756	14.2034	14.4016	13.6129	13.5612
C20orf96	0.31033	1.32984	1.52999	1.62385	1.32434	1.2139
C21orf140	-1.33737	1.46714	0.222658	0.134592	0.446445	0.453791
C21orf2	0.175891	3.04514	3.79375	3.8513	3.30392	3.44859
C21orf33	-0.0561287	0.882571	12.2085	12.0569	12.7791	12.3943
C21orf58	-0.0406061	0.549822	7.1725	7.20143	7.44427	7.30802
C21orf59	-0.0619383	0.44943	2.59321	2.60036	2.65772	2.75163
C21orf59-TCP10L	-0.272734	0.0776509	0.00464369	0.00918659	0.0107741	0.00591509
C21orf62	0.0127872	0.00566581	0.0382024	0.0348811	0.033333	0.0389295
C21orf62-AS1	0.201111	0.214	0.532984	0.502564	0.467419	0.431457
C21orf91	-0.0904244	1.46759	3.59496	3.72614	3.80671	3.97078
C21orf91-OT1	-0.0972684	0.0397154	0.386391	0.343978	0.464845	0.314996
C22orf15	0.396946	0.800334	1.18201	0.965255	0.772421	0.85436
C22orf23	-0.212008	0.494269	0.85455	0.748226	0.887722	0.964347
C22orf24	0.164257	0.160038	0.253281	0.22171	0.231132	0.191863
C22orf34	-0.0927771	0.475085	2.58244	2.60798	2.8047	2.71861
C22orf39	0.0556076	0.489686	12.4426	12.3912	11.789	12.0529
C22orf46	0.279954	2.17285	1.98435	2.0573	1.65471	1.66685
C2CD2	-0.290456	3.78201	1.102	1.11321	1.33364	1.36965
C2CD2L	0.0620371	0.421479	4.33968	4.34838	4.13692	4.16722
C2CD3	-0.0011481	0.00587248	4.30169	4.18129	4.17331	4.29738
C2CD5	0.0622666	0.960857	2.70538	2.75015	2.57699	2.63661
C2CD6	-0.631739	0.122105	0.0037127	0.00367241	0.0057427	0.00567505
C2orf15	-0.205035	0.669737	1.52576	1.40382	1.62042	1.74867
C2orf16	-0.24379	0.402607	0.275808	0.257659	0.317984	0.312286
C2orf27A	0.767156	5.72408	3.94859	3.9154	2.58009	2.03179
C2orf42	-0.0587197	0.292936	0.551176	0.537963	0.557218	0.574623
C2orf48	0.260238	0.834041	2.27116	2.11654	1.77422	1.88083
C2orf49	-0.0816307	0.964468	5.05108	5.01946	5.42483	5.20908
C2orf68	-0.0410164	0.501022	19.2186	19.4566	19.5046	20.1978
C2orf69	-0.100391	1.14465	9.08957	8.88058	9.56688	9.65555
C2orf74	0.218188	1.27071	3.55511	3.53486	3.02071	3.0607
C2orf76	0.15331	0.932722	2.70151	2.82148	2.44336	2.51198
C2orf81	0.326302	1.36216	0.547906	0.633222	0.487413	0.452742
C2orf82	-0.238358	0.128977	0.0244157	0.0193205	0.0237383	0.0277238
C2orf88	-1.82862	inf	1.3211	1.40966	4.85615	4.82318
C3	1.43866	0.353463	0.0186605	0.0138435	0.00721588	0.00475392
C3AR1	1.68905	0.566793	0.00666765	0.015389	0.00229185	0.0045297
C3orf14	-4.68392	15.0496	0.00656626	0.0032475	0.12752	0.123788
C3orf18	0.177656	0.14499	0.0894101	0.0977493	0.0703616	0.0947084
C3orf20	0.356775	7.84843	3.04304	2.79548	2.29482	2.25439
C3orf33	0.880245	0.998792	0.170275	0.12788	0.0780373	0.0835445
C3orf35	0.0533751	0.0331969	0.0765658	0.0620478	0.0580258	0.075203
C3orf38	0.127884	2.07484	18.2986	19.7275	17.4987	17.2281
C3orf49	-0.27512	0.379327	0.991134	0.888753	1.17487	1.09495
C3orf52	-0.42169	14.7952	6.03096	5.79429	7.7263	8.07766
C3orf58	0.145666	8.83714	17.52	17.4011	15.6851	15.8126
C3orf62	-0.187175	0.895437	2.16512	2.01719	2.3726	2.37839
C3orf70	-0.233896	0.0449618	0.0201307	0.00796488	0.00830334	0.0246166
C3orf79	0.751211	0.626064	0.782068	0.712508	0.424449	0.461394
C4orf19	-0.359741	0.511814	0.148765	0.126129	0.177005	0.17492
C4orf22	0.0223866	0.0207139	1.18231	1.05382	0.991418	1.20481
C4orf26	-1.04906	0.190343	0.00254748	0.00377975	0.00788073	0.00519193
C4orf3	-0.0365363	0.302946	9.17173	9.02151	9.35626	9.26275
C4orf32	-0.11034	2.59818	23.1268	23.2854	25.0436	24.9485
C4orf33	0.245454	2.84161	4.91514	4.88229	4.16726	4.07946
C4orf36	0.159057	0.0281649	0.0526028	0.143088	0.054243	0.120609
C4orf46	-0.0497289	0.732809	8.23997	8.24359	8.38911	8.63468
C4orf47	0.898089	3.26634	0.898067	0.854372	0.483679	0.454666
C4orf48	0.23807	1.59154	11.2473	10.8407	9.10309	9.58226
C5	-0.3133	5.2037	1.23353	1.14857	1.46896	1.48423
C5AR1	-1.6356	0.33673	0	0.0200876	0.0261765	0.0362153
C5AR2	1.23633	1.8027	0.159054	0.171375	0.0995795	0.0405203
C5orf15	0.0533769	0.596509	27.3158	26.4418	26.0442	25.6471
C5orf22	0.0809592	0.781768	5.33375	5.46934	4.98618	5.20475
C5orf24	-0.169516	4.41068	3.79062	3.85138	4.19459	4.38114
C5orf30	0.327389	10.6312	4.26709	4.18932	3.26796	3.45635
C5orf34	0.0947503	1.00414	14.382	13.937	13.0763	13.3832
C5orf42	0.842644	1.98706	0.13423	0.105375	0.0768973	0.0564508
C5orf47	-0.570796	0.16634	0.0471795	0.0280005	0.0729759	0.038462
C5orf51	0.165798	5.99665	14.2297	14.0349	12.659	12.4821
C5orf56	0.125763	0.273893	5.88565	5.52849	4.89202	5.54445
C5orf63	-0.0373534	0.0631232	0.794535	0.872646	0.789784	0.917247
C5orf66	-0.115157	0.4739	4.0177	3.87415	4.37121	4.15791
C5orf66-AS1	-0.489193	0.201522	0.0708114	0.126077	0.146039	0.129887
C5orf66-AS2	-0.892035	0.240398	0.0275396	0.0272407	0.0283983	0.0729658
C6	-0.463699	0.0647628	0.00319437	0.00631941	0.00658795	0.00651034
C6orf10	-0.102463	0.0364935	0.00667311	0.00687572	0.00458745	0.00991684
C6orf106	-0.296673	18.314	20.5024	19.7544	25.0328	24.3071
C6orf120	0.0778911	1.44152	8.93258	8.84561	8.46442	8.3427
C6orf132	1.3313	0.303338	0.0123387	0.0104612	0.00545288	0.00359243
C6orf136	-0.135471	0.630069	0.34947	0.32296	0.382075	0.354951
C6orf163	-0.184116	0.141794	0.548502	0.54255	0.603312	0.633468
C6orf201	0.431112	0.523353	0.140237	0.130458	0.113622	0.0867645
C6orf203	0.0860218	0.47819	3.94059	3.89782	3.72047	3.64818
C6orf223	1.04025	107.532	2.98112	3.00217	1.43237	1.47051
C6orf226	-0.305049	0.755932	3.9871	3.98646	4.71146	5.11716
C6orf229	-0.296305	0.0695594	0.101496	0.129079	0.164467	0.118204
C6orf47	-0.0664733	0.32881	1.04421	1.04576	1.10434	1.07946
C6orf48	-0.26359	21.2954	2.94654	3.03454	3.54411	3.62028
C6orf52	-0.010961	0.00587248	0.499389	0.34642	0.327702	0.522112
C6orf62	-0.0489405	1.02207	52.1599	54.0649	54.7293	54.9234
C6orf89	0.0107121	0.0749387	2.84674	2.92395	2.84391	2.87164
C6orf99	0.453981	1.72175	1.08247	1.039	0.781354	0.763979
C7orf13	1.22288	5.11546	0.923848	0.718736	0.321119	0.380804
C7orf25	0.101793	0.449791	3.33324	3.42611	3.13112	3.15406
C7orf26	-0.0748817	0.775235	9.70345	9.82715	10.1299	10.3958
C7orf31	0.0924384	0.108217	0.593919	0.587473	0.50356	0.601861
C7orf43	-0.00275101	0.0109359	9.27239	9.21783	9.28405	9.20105
C7orf49	-0.0164384	0.125742	4.74086	4.84668	4.8469	4.82953
C7orf50	0.138898	8.41515	8.369	8.20261	7.61167	7.4062
C7orf61	0.816894	0.504846	0.284717	0.316831	0.207963	0.132979
C7orf71	-1.04455	0.329097	0.021957	0.0144791	0.0301888	0.0447498
C7orf72	3.0553	205.034	15.3397	15.9142	1.72927	2.02119
C7orf73	-0.0610043	0.699651	23.2409	23.0028	23.4453	24.6872
C8G	1.37451	5.30447	1.82904	1.66067	0.619305	0.723284
C8orf33	0.00917064	0.0634077	30.4833	30.6472	30.7165	29.896
C8orf34	-0.367519	0.0589783	0.00131711	0.00130282	0.00135818	0.00201327
C8orf37	-0.107951	0.569683	4.20054	4.06774	4.56427	4.32721
C8orf37-AS1	0.2296	0.0639906	0.0570594	0.0398401	0.0242277	0.0581455
C8orf44	0.216288	0.657866	2.54286	2.35299	2.1797	2.02542
C8orf44-SGK3	1.31361	0.378864	0.0130668	0.0336049	0.00808452	0.0106524
C8orf46	1.14622	1.55202	0.168222	0.159604	0.0708028	0.0769656
C8orf58	-0.159249	0.416476	0.718568	0.679613	0.771424	0.786411
C8orf59	0.0638317	0.45749	5.9857	6.12944	5.70173	5.86359
C8orf76	-0.0381637	0.0544604	2.63101	3.02447	2.92385	2.87129
C8orf82	0.0549805	0.313799	14.239	13.573	13.4197	13.293
C8orf88	1.05053	14.7342	6.86191	6.14796	3.18122	3.08595
C8orf89	1.43872	0.334193	0.0849737	0.210129	0.0219058	0.086591
C9	2.20212	10.9587	0.543414	0.750024	0.108597	0.171708
C9orf116	-0.254954	0.104636	0.145026	0.236274	0.158345	0.295573
C9orf129	0.460843	0.588157	0.868152	0.797392	0.554185	0.652975
C9orf131	0.197386	0.168449	0.0673897	0.05304	0.0590299	0.0457816
C9orf147	0.12632	0.138365	0.536028	0.689274	0.59526	0.525221
C9orf152	-0.123588	0.0486024	0.147655	0.088517	0.101506	0.155025
C9orf153	0.879206	0.247191	0.0232513	0.0167265	0.013078	0.00861595
C9orf16	0.078492	0.624559	46.8322	44.0111	42.609	43.2304
C9orf163	0.0845982	0.0324237	0.378599	0.758114	0.542756	0.526953
C9orf172	-0.0477061	0.0404748	0.47014	0.533189	0.572564	0.462568
C9orf24	-0.104322	0.0485403	0.132118	0.165277	0.208363	0.110874
C9orf3	0.21193	1.34639	1.11559	1.04747	0.910606	0.952668
C9orf40	0.177205	6.20295	29.9407	29.7978	25.9509	26.7651
C9orf41-AS1	-0.362861	0.916433	1.26387	1.03528	1.59515	1.355
C9orf43	0.172622	0.349503	0.528124	0.543364	0.50484	0.443897
C9orf64	-0.208031	0.538698	0.742356	0.755057	0.814193	0.911525
C9orf66	-0.470559	1.91145	0.891164	0.822445	1.19595	1.17318
C9orf72	0.0764626	0.583267	3.88202	3.6258	3.57828	3.52617
C9orf78	-0.134962	5.66656	51.393	50.8158	56.1228	55.8631
C9orf84	-0.268572	0.115819	0.0184383	0.0165801	0.0198774	0.0222054
C9orf85	-0.142703	0.569072	6.63954	6.13741	6.70645	7.36589
CA11	0.482833	0.470549	0.137507	0.182259	0.116271	0.112099
CA13	-0.341431	1.00267	0.700531	0.753979	1.04378	0.795628
CA14	0.183251	0.253871	1.01037	1.07079	0.872735	0.956054
CA3	3.76354	0.892761	0.0612819	0.033676	0	0.0069387
CA4	-0.285448	0.0804146	0.0396956	0.0271833	0.0314871	0.049786
CA5B	0.310835	0.788297	0.453398	0.448477	0.36793	0.357569
CA5BP1	0.0841537	0.189029	6.13566	6.67479	5.62122	6.43597
CA8	-0.89197	29.4874	0.361073	0.380151	0.690843	0.681738
CAAP1	-0.141766	4.19804	11.5562	11.3311	12.7906	12.4051
CAB39	-0.0646736	2.47688	14.8563	14.7689	15.4276	15.4879
CAB39L	-0.738786	26.807	0.704938	0.724863	1.19784	1.18305
CABIN1	0.152715	10.258	6.61519	6.60886	5.97491	5.89505
CABLES1	0.237889	18.4929	6.45549	6.39083	5.41065	5.4588
CABLES2	0.00102217	0.00370277	6.85766	7.07884	6.76008	7.13564
CABP1	1.27564	0.395585	0.0214076	0.0393254	0.00630716	0.0186986
CABP4	-0.24748	0.449964	0.197869	0.148982	0.213174	0.197622
CABP7	-0.896162	0.424267	0.0239497	0.0552762	0.0658573	0.0813519
CABYR	-2.27447	5.84561	0.0133937	0.0183439	0.0934922	0.0598441
CACFD1	-0.0783183	0.294117	1.06247	1.02317	1.10896	1.0882
CACNA1A	0.00815846	0.004002	0.0110664	0.0109463	0.0114115	0.0104313
CACNA1B	-0.502847	0.0862692	0.00369154	0.00121716	0.00317221	0.0037618
CACNA1C	-0.13779	0.0959382	0.00256535	0.00208303	0.00252689	0.00257516
CACNA1C-AS1	-0.242423	0.0709249	0.10136	0.0422146	0.0660127	0.103289
CACNA1C-AS2	0.747378	0.259103	0.293453	0.212864	0.161388	0.139551
CACNA1C-AS4	-1.35602	1.13121	0.145806	0.192298	0.467762	0.396216
CACNA1C-IT3	0.400531	0.0322565	0.055621	0.247578	0.229421	0
CACNA1D	-0.0498425	0.00765939	0.00312037	0.00462975	0.00536277	0.0026498
CACNA1E	-1.56144	0.534713	0.000530043	0.00131073	0.00191299	0.00351085
CACNA1F	0.959836	0.199859	0.00665718	0.00263397	0.000686475	0.00407033
CACNA1H	-1.0412	0.168299	0.00369043	0	0.0038055	0.00376067
CACNA1S	-2.05036	0.475863	0.0019391	0.00383612	0.0159965	0.00790405
CACNA2D1	-0.486747	0.134016	0.0091953	0.0129936	0.0230278	0.0080317
CACNA2D2	-0.326211	0.354686	0.0361915	0.0331665	0.0450035	0.0417616
CACNA2D4	0.291159	0.619923	0.432025	0.473834	0.353165	0.385502
CACNB1	-0.0351465	0.102508	1.72023	1.72395	1.71552	1.80569
CACNB2	-0.272175	1.41049	0.153112	0.137453	0.166349	0.183713
CACNB3	0.223035	0.771722	0.457528	0.461162	0.393348	0.392037
CACNB4	-0.705807	0.349993	0.00132874	0.00210291	0.00315139	0.00243725
CACNG8	-0.173719	0.0287604	0.0081457	0.00671442	0.0111996	0.00553383
CACTIN	0.0191168	0.108477	7.0997	7.13116	7.05	6.96309
CACTIN-AS1	-0.0343506	0.0175309	0.441661	0.295347	0.436188	0.316949
CACUL1	-0.0793614	2.19974	15.0013	15.0427	15.8602	15.8136
CACYBP	0.0297383	0.762712	40.1503	40.2123	39.616	38.9368
CAD	-0.0572254	4.78002	29.463	29.4514	30.5914	30.5728
CADM1	0.179821	8.2525	4.04959	4.00018	3.56874	3.5222
CADM2	-1.30672	0.281767	0.000555776	0.000366496	0.00076414	0.00151028
CADM4	0.187282	0.0636794	0.126039	0.0921483	0.118667	0.0725954
CADPS	-0.210712	20.2561	8.16277	8.22388	9.50971	9.41281
CAGE1	0.0894886	0.0583696	0.0805354	0.0912252	0.0776887	0.0833919
CAHM	0.22979	0.248071	1.43574	1.24762	1.10692	1.17593
CALB1	-0.870293	0.29458	0.0329341	0.0279228	0.0630703	0.0479441
CALCB	-0.683942	0.148333	0.0462966	0.0572427	0.0716102	0.0943555
CALCOCO1	-0.0878297	0.103622	0.248757	0.216476	0.250906	0.24241
CALCOCO2	-0.00193544	0.00821702	3.00146	3.05231	3.00471	3.04393
CALCR	1.41959	0.256201	0.00766841	0.00433439	0	0.00446535
CALCRL	2.05826	18.4878	0.245029	0.283088	0.0525551	0.073909
CALD1	-0.137979	0.0272516	0.00524101	0.00259207	0.00432354	0.00427261
CALHM1	0.0885275	0.0293842	0.108874	0.0653849	0.0882114	0.0752852
CALHM2	-0.10535	0.244597	0.862719	0.92447	0.989919	0.928699
CALHM3	1.8716	3.30556	0.374472	0.356161	0.0816852	0.117415
CALM1	0.12203	18.6776	93.5616	93.4334	85.2391	86.2111
CALM2	-0.0876848	12.6197	55.0064	54.7584	58.2603	58.1275
CALM3	0.120011	12.1943	16.7026	16.6646	15.2551	15.3812
CALML4	0.252593	2.71936	0.74206	0.82033	0.637574	0.671026
CALML6	-0.0699734	0.0280673	0.177571	0.208577	0.280384	0.124404
CALR	0.04395	4.58769	371.786	370.506	358.044	360.393
CALR3	1.43909	0.656996	0.120324	0.137329	0.0381772	0.0565913
CALU	0.230044	46.97	8.6784	8.73823	7.43067	7.38665
CAMK1	0.310646	1.8809	5.06296	4.80166	3.82253	4.11274
CAMK1D	0.161087	10.2665	10.4642	10.3943	9.32578	9.2883
CAMK2B	0.628058	0.137921	0.00267985	0.00265077	0.00276341	0.000682714
CAMK2D	0.00536463	0.0622723	1.29539	1.27817	1.26502	1.29328
CAMK2G	-0.00956645	0.0446474	1.62648	1.6404	1.66392	1.61762
CAMK2N2	-0.0770066	0.0708658	1.03186	1.02931	1.10911	1.06041
CAMK4	0.246609	31.832	3.09478	3.04798	2.56321	2.60288
CAMKK1	0.721646	0.379459	0.0338786	0.0235818	0.0219961	0.0127865
CAMKK2	-0.181276	7.02152	1.5095	1.5026	1.70233	1.70556
CAMKMT	0.0797919	0.377757	11.2675	10.5214	10.4371	10.1339
CAMKV	-1.8504	0.447311	0.0072764	0	0.0150066	0.0111223
CAMLG	0.0800787	1.17252	26.3395	25.4868	24.4469	24.4726
CAMP	-0.514435	13.0818	18.7341	18.7369	26.953	26.4558
CAMSAP1	-0.0864793	2.97187	16.501	16.0535	17.1747	17.3141
CAMSAP2	-0.592775	10.181	0.375718	0.39033	0.598963	0.553951
CAMSAP3	-0.59106	6.6638	0.635985	0.653278	0.943662	0.994129
CAMTA1	-0.00584931	0.0232214	0.270957	0.262667	0.266262	0.26834
CAMTA2	-0.148454	0.665579	0.473742	0.453956	0.507098	0.518834
CAND1	-0.0227453	0.850514	18.4065	18.4421	18.5565	18.7953
CAND1.11	0.988839	4.36073	2.07083	2.5344	1.31502	1.00147
CAND2	0.483082	2.971	0.637923	0.562964	0.43947	0.417801
CANT1	0.169438	4.42257	5.08932	5.05794	4.46394	4.53894
CANX	0.0663398	16.0415	110.011	110.505	105.079	105.068
CAP1	0.0851382	8.8318	9.7596	9.89315	9.22533	9.26085
CAPG	1.87147	26.575	0.623435	0.561885	0.169871	0.153398
CAPN1	0.257326	17.9372	8.05985	7.88939	6.67539	6.63901
CAPN10	-0.0824348	1.45701	13.0129	13.1824	13.9262	13.7495
CAPN10-AS1	0.0448425	0.166775	4.70874	4.84868	4.74911	4.49634
CAPN11	-5.29979	1.58085	0	0	0.0452693	0.0178944
CAPN12	0.549443	0.578912	0.309486	0.196526	0.204877	0.140167
CAPN13	-5.39497	1.72139	0	0	0.0276419	0.0409744
CAPN14	1.50868	5.46178	0.206078	0.160928	0.0687043	0.0600002
CAPN15	-0.252925	8.56728	8.70672	8.46819	10.1768	10.2437
CAPN2	0.300357	0.218656	0.106154	0.106752	0.114937	0.057693
CAPN3	-0.608664	0.401665	0.0207108	0.0153646	0.0311451	0.0237432
CAPN7	-0.102996	2.1875	14.2408	14.451	15.5271	15.2217
CAPNS1	0.140588	5.96883	18.1708	17.6708	16.2963	16.1459
CAPRIN1	-0.0163881	0.630891	64.1683	64.2897	64.9794	64.6632
CAPRIN2	-0.00673627	0.0260298	0.786567	0.777405	0.787276	0.780581
CAPS	0.0307927	0.0494123	1.14428	1.15981	1.14791	1.10272
CAPS2	0.0667235	0.0299105	0.0461083	0.0401784	0.047546	0.03468
CAPSL	0.905412	1.27448	0.296272	0.436595	0.199517	0.191005
CAPZA1	0.0245525	1.02065	169.426	170.238	165.918	167.283
CAPZA2	-0.011099	0.128415	77.512	79.1392	79.9549	77.5688
CAPZB	0.0819441	2.40469	12.857	12.8224	12.2075	12.0013
CARD10	0.831237	1.48352	0.336751	0.211971	0.170469	0.137264
CARD11	-0.210114	15.2589	11.4013	11.2855	13.1466	13.0395
CARD14	1.24122	0.771396	0.0227856	0.0187819	0.012727	0.00483734
CARD16	4.97178	27.7925	1.74923	1.9577	0.0762159	0.0418434
CARD19	-0.140174	0.624071	0.853876	0.87299	0.969261	0.929774
CARD6	2.18584	64.5967	2.4075	2.28382	0.520442	0.5084
CARD8	0.249815	12.7291	0.726619	0.726917	0.607374	0.61237
CARD8-AS1	0.0678964	0.288126	8.71404	9.76354	8.67977	8.91075
CARD9	-0.17765	0.219669	0.376505	0.354398	0.416423	0.408424
CARF	0.15845	1.43408	0.178308	0.174006	0.152437	0.162514
CARHSP1	-0.0553463	0.828279	3.23529	3.10956	3.30182	3.27659
CARM1	-0.0288817	0.450517	45.678	45.4131	46.7248	46.0063
CARMIL1	-0.442618	67.9884	9.03697	8.81129	12.126	12.0775
CARMIL2	0.0123398	0.155054	19.6154	19.856	19.672	19.3788
CARMIL3	-0.207496	0.329246	0.39844	0.394116	0.480684	0.432561
CARNMT1	-0.0573029	1.34243	9.48172	9.31404	9.70404	9.80997
CARNS1	0.00780686	0.00596881	0.251285	0.236651	0.228087	0.256067
CARS	0.196873	10.0834	7.01693	7.2249	6.27169	6.12691
CARS2	0.11508	3.61564	9.14423	9.12365	8.43645	8.39404
CARS-AS1	-0.57823	1.06239	0.307806	0.330941	0.538206	0.413674
CASC1	0.260532	0.432551	0.0442901	0.0499095	0.0427805	0.0357066
CASC10	0.630307	0.18977	0.0478111	0.0945844	0.0369764	0.0548112
CASC11	-0.0078112	0.0476527	47.2638	46.0845	45.582	48.0612
CASC15	0.955524	0.166007	0.0379598	0.0250319	0.0130478	0.0193411
CASC2	-0.103416	0.0380564	0.0255552	0.0412428	0.0277389	0.0438595
CASC3	0.0272108	0.341883	27.5812	27.1381	27.0773	26.5027
CASC4	0.0428467	0.785217	15.6132	15.9524	15.3464	15.2294
CASC8	-0.423014	0.240534	0.104238	0.0832783	0.140561	0.110307
CASD1	-0.0079008	0.0439005	17.0822	16.5925	16.4667	17.3164
CASK	0.151239	1.98635	1.24388	1.22276	1.13573	1.08066
CASKIN1	-0.792971	0.63253	0.0376654	0.0517454	0.0992574	0.0554412
CASKIN2	0.0762306	0.0482022	0.0852158	0.0818119	0.0891652	0.0689594
CASP1	5.65368	59.1078	0.714595	0.704255	0.0148184	0.0133125
CASP10	2.27266	22.526	0.118612	0.104783	0.0248838	0.0212563
CASP14	-1.95325	0.563454	0.00757098	0.00748881	0.0273247	0.0308603
CASP16P	-0.512927	0.504846	0.410993	0.294088	0.459877	0.543569
CASP2	-0.193756	9.71628	6.35233	6.52044	7.36482	7.32651
CASP3	0.143641	9.03496	27.4019	27.2387	24.7444	24.6099
CASP4	0.273969	0.953749	1.90343	1.64687	1.53125	1.39857
CASP6	0.0568959	0.23576	3.72541	3.60874	3.57664	3.45858
CASP7	0.13099	2.02686	2.03632	2.05144	1.91002	1.81501
CASP8	0.0171982	0.0823221	2.07038	2.00065	2.02289	1.99106
CASP8AP2	0.0185356	0.190862	6.05423	6.19652	5.92416	6.1435
CASP9	0.0929139	0.500729	1.21151	1.18373	1.0891	1.15165
CASQ1	-0.630495	0.292384	0.0914875	0.0663627	0.113208	0.13052
CASQ2	-1.74997	0.426207	0.00441617	0.0131047	0.0318771	0.0270013
CASS4	0.534666	0.165016	0.0117185	0.0168601	0.0142809	0.00542796
CAST	0.164496	9.41554	1.34203	1.34109	1.2178	1.17106
CASTOR1	0.44086	1.06049	1.17057	1.40547	0.895816	0.997797
CASTOR2	0.380889	1.17271	0.371933	0.384084	0.265403	0.313822
CASZ1	0.61904	6.46596	0.641792	0.574005	0.390345	0.399454
CAT	0.0623828	1.32542	43.9747	44.1137	42.0047	42.1713
CATIP-AS2	0.582809	0.138245	0.100722	0.06974	0.0519311	0.0615832
CATSPER2	-0.685324	0.441185	0.0283216	0.03131	0.0549735	0.0407444
CATSPER2P1	-0.196614	0.222677	0.749928	0.70578	0.855898	0.808718
CATSPER3	-0.510937	0.623324	0.445643	0.42352	0.576676	0.658927
CATSPERD	0.327474	0.113028	0.0953439	0.0707318	0.0786534	0.0534372
CATSPERE	0.26443	0.193574	0.0606003	0.0905516	0.0678081	0.057812
CATSPERG	-0.311001	0.37201	0.133629	0.11606	0.1546	0.15444
CAVIN4	-0.550037	0.212246	0.0307048	0.0607431	0.0554088	0.078223
CBARP	-2.95139	1.59576	0.0185911	0	0.0814759	0.0615711
CBFA2T2	0.0970402	0.852016	1.24294	1.2697	1.18851	1.15567
CBFA2T3	-0.473999	7.98797	1.21908	1.31929	1.76811	1.75016
CBFB	-0.127093	12.2378	36.1729	36.4013	39.2449	39.8385
CBL	-0.237013	20.7229	9.51277	9.42734	11.1906	11.0825
CBLB	-0.391245	4.59155	0.0477921	0.0475915	0.0634103	0.0614179
CBLL1	0.0656079	1.46888	7.72187	7.85896	7.4085	7.44725
CBLN3	1.08268	8.83693	1.7247	1.52033	0.753238	0.77538
CBR1	-0.739461	4.65803	0.661544	0.675937	1.11696	1.11121
CBR3-AS1	-0.255295	0.11919	0.0592507	0.101792	0.106118	0.0858009
CBR4	0.0919794	1.12978	12.782	13.2582	12.4765	11.9038
CBS	-0.375405	17.109	2.7503	2.76566	3.60734	3.53254
CBWD1	-0.0845442	1.42909	11.2589	11.421	11.949	12.0472
CBWD2	-0.069055	0.809938	3.29929	3.24792	3.37378	3.4791
CBWD3	0.0338513	0.0697368	2.24625	2.15889	2.16674	2.12679
CBWD5	-0.0476236	0.260713	3.10249	3.18638	3.15465	3.33083
CBWD6	0.0637804	0.141083	3.87473	3.84647	3.52844	3.84196
CBX1	-0.0412953	0.540671	17.7947	18.0038	18.5078	18.2507
CBX2	-0.0660056	0.933715	11.3184	11.2594	11.7632	11.8197
CBX3	-0.194479	50.997	83.4882	83.608	95.6218	95.1716
CBX3P2	0.115261	0.151182	1.50623	1.60512	1.45022	1.41618
CBX4	0.199509	9.95377	34.1161	35.1764	30.4605	29.7539
CBX5	-0.00990994	0.371204	24.6221	24.6832	24.6821	24.8543
CBX6	0.0373621	0.934442	15.6701	15.9301	15.4679	15.2581
CBX7	0.240082	3.14438	1.6484	1.61674	1.38898	1.36957
CBX8	0.107067	0.493816	8.93906	8.37708	7.77949	8.2611
CBY1	0.238157	0.802395	2.09093	2.5595	1.86932	2.06493
CBY3	0.179182	0.0987745	0.499694	0.901318	0.59105	0.643994
CC2D1A	-0.197035	5.68293	12.1743	12.4098	13.9952	14.1252
CC2D1B	0.0315741	0.233846	4.8891	4.95085	4.90507	4.70138
CC2D2A	0.484356	1.00847	0.196973	0.187827	0.124207	0.150181
[truncated: 15,619 more rows]

## Sheet: EBNA2- Deseq with FPKM
Gene	log2foldChange	adjusted p-value	FPKM (EBNA2- Rep1)	FPKM (EBNA2- Rep2)	FPKM (Uninfected Rep1)	FPKM (Uninfected Rep2)
A1BG	0.0355934	0.109536	8.92065	8.32596	7.94763	8.17065
A1BG-AS1	0.161229	0.411938	2.2062	2.13813	1.87194	1.84989
A1CF	0.849891	0.351356	0.00292473	0.00359823	0.00152666	0.00193973
A2M	0.233289	0.126811	0.02397	0.0241161	0.022879	0.0163291
A2M-AS1	0.21572	0.0712495	0.0333918	0.0298772	0.0235418	0.0286332
A2ML1	0.479395	0.203948	0.0239639	0.0292015	0.0176995	0.0188365
A2MP1	0.484324	0.05069	0.034441	0.0254232	0.0410918	0
A4GALT	-0.201018	11.9522	17.4145	17.4714	19.0664	19.3511
A4GNT	0.0919319	0.0133324	0.0232204	0.0457081	0.0346305	0.027378
AAAS	0.0642842	1.2036	24.2105	24.3274	22.3312	22.1432
AACS	-0.0291694	0.260064	7.19982	7.20248	6.98156	7.09755
AADAC	0.520134	0.0626248	0.0192319	0.0378569	0.0382428	0
AADACL2	0.0872397	0.00969397	0	0.0540547	0.0163817	0.0323775
AADACL3	-2.31952	0.408466	0.00130346	0.00128289	0.00622065	0.00614737
AAED1	-0.00417937	0.0099765	10.3897	11.1456	10.5979	10.0958
AAGAB	-0.0449198	0.532017	7.7243	7.65717	7.7331	7.46924
AAK1	0.287421	0.213411	0.0333369	0.0294823	0.0288221	0.0205074
AAMDC	0.103879	0.249315	1.24843	1.38643	1.18418	1.16498
AAMP	-0.0249605	0.240504	25.1503	25.1664	24.0472	24.9957
AANAT	0.271455	0.577393	0.627693	0.627875	0.476853	0.519568
AAR2	-0.0508024	0.339761	7.05108	7.10745	7.27294	6.77874
AARS	0.10305	13.9511	121.651	121.741	107.835	109.259
AARS2	0.0931094	1.72983	13.0557	12.9982	11.7952	11.6054
AARSD1	0.85155	0.117764	0.0303651	0.0373575	0.00905721	0.0268515
AASDH	-0.0550737	0.337193	0.923044	0.877049	0.906751	0.884846
AASDHPPT	0.00111899	0.00868155	42.5312	43.0666	41.3597	40.5842
AASS	0.750529	0.19172	0.0263299	0.0138211	0.00418859	0.0186266
AATBC	0.40662	1.55975	0.826254	0.84179	0.67408	0.531859
AATF	0.00427404	0.0361805	61.6721	62.2078	58.7248	59.6017
AATK	0.832047	0.214106	0.00989435	0.00973824	0.00590251	0.00466638
AATK-AS1	0.267287	0.0318562	0.0195991	0.0385798	0	0.0462168
ABALON	0.193946	0.319215	1.23031	1.60392	1.15243	1.22156
ABAT	-0.185561	1.13432	0.65172	0.628198	0.707759	0.686733
ABCA1	0.102299	2.75928	8.03928	8.15889	7.32706	7.1296
ABCA10	0.804076	0.512775	0.0538377	0.0449597	0.0311438	0.0230827
ABCA11P	-0.0896039	0.285026	5.34327	4.99735	5.57901	4.96324
ABCA12	-0.294317	0.143818	0.00978885	0.0119467	0.0126135	0.0129266
ABCA13	0.545637	0.293214	0.0173834	0.019469	0.0150188	0.00918784
ABCA17P	0.206805	0.332597	0.551188	0.503742	0.449182	0.426483
ABCA2	-0.472747	3.73476	0.321801	0.282432	0.409639	0.393611
ABCA3	0.246924	0.429903	0.334846	0.312701	0.260144	0.262588
ABCA4	1.60984	0.867316	0.0338587	0.0194393	0.00673284	0.00998029
ABCA5	-0.402708	6.01883	0.660801	0.624174	0.842754	0.784699
ABCA6	-0.777408	65.3576	5.2752	5.69349	9.08443	8.92908
ABCA7	0.0821259	1.71218	11.3806	11.3785	10.2723	10.3246
ABCA8	0.582585	0.178014	0.00941706	0.00695136	0.00491555	0.0055516
ABCA9	-0.251101	0.0978192	0.034419	0.0354891	0.0410655	0.0386493
ABCB1	1.14001	0.758618	0.017389	0.01325	0.00870031	0.00462959
ABCB10	0.0698209	0.789579	13.4273	13.3758	12.5352	11.9311
ABCB11	0.489677	0.084293	0.0216208	0.00851189	0.0154776	0.00509842
ABCB4	0.260882	0.367763	0.133359	0.1373	0.102585	0.11379
ABCB5	0.0529943	0.0112071	0.0104974	0.00590385	0.0107353	0.00442033
ABCB6	-0.0702169	0.394831	3.59003	3.5368	3.61253	3.55566
ABCB7	-0.10481	2.18056	5.05712	4.98769	5.13015	5.21767
ABCB8	0.116524	2.08329	2.72553	2.74643	2.45909	2.37666
ABCB9	-0.04785	0.0839097	0.395289	0.340173	0.354717	0.373486
ABCC1	0.0540393	1.27835	19.8638	19.5875	18.2274	18.1776
ABCC10	0.154297	1.91766	1.75796	1.66287	1.43723	1.50725
ABCC11	1.73168	0.754845	0.0118893	0.00950762	0.00354629	0.00262839
ABCC12	0.264665	0.040512	0.0139801	0.00982825	0.014297	0.00470951
ABCC2	0.652962	1.40251	0.255922	0.223897	0.149278	0.14305
ABCC3	-0.322888	0.0838784	0.0131808	0.0187385	0.0262101	0.0120873
ABCC4	0.090829	2.76483	6.62142	6.68883	6.12056	5.85369
ABCC5	0.0737773	0.64836	2.46669	2.37866	2.15662	2.25348
ABCC5-AS1	0.664562	0.559538	1.03515	0.997142	0.709494	0.51936
ABCC6	0.10054	0.0410249	0.0183838	0.0277868	0.0203671	0.0209013
ABCC6P1	0.534602	0.0701024	0.0226899	0.011166	0.00451192	0.0178351
ABCC8	0.879215	0.250458	0.00312221	0.00478015	0.00248342	0.00163611
ABCC9	0.739146	0.208676	0.0119176	0.00781969	0.00853136	0.00281029
ABCD1	0.244448	1.04842	1.64316	1.77204	1.43767	1.3247
ABCD2	0.723044	2.83532	0.402374	0.439607	0.254968	0.233805
ABCD3	0.0330553	0.422717	22.0649	22.0785	20.5408	20.7907
ABCD4	0.132984	1.69822	5.22768	5.36369	4.72767	4.52635
ABCE1	-0.0968451	11.3544	42.1637	42.833	43.3757	43.7069
ABCF1	-0.0161863	0.224708	3.68076	3.71826	3.59289	3.57561
ABCF2	-0.00357749	0.0374489	31.3123	31.1331	30.4746	29.5001
ABCF3	0.0954894	2.47774	8.55519	8.4202	7.53689	7.68359
ABCG1	0.64719	24.7829	1.43458	1.43509	0.916691	0.838964
ABCG2	0.681131	0.128322	0.00231822	0.00228164	0.00118538	0.00156189
ABCG5	0.421719	0.0571836	0.030109	0.00740849	0.0179616	0.00887503
ABCG8	0.0413589	0.00552188	0.0154803	0.019045	0.0184696	0.013689
ABHD1	0.293605	1.20109	3.37828	3.41637	2.57348	2.73685
ABHD10	-0.0952743	1.06286	3.22176	3.28656	3.30173	3.359
ABHD11	0.0947627	0.510074	1.91505	1.72593	1.7018	1.56468
ABHD11-AS1	0.196905	0.179239	2.10083	2.36922	1.69712	2.03835
ABHD12	0.0552204	0.344538	7.72778	7.78562	7.15621	7.14791
ABHD12B	0.473879	0.375144	0.110686	0.113212	0.0776825	0.0767674
ABHD13	-0.0722493	0.321696	3.26493	3.06284	3.1191	3.2536
ABHD14A	0.379785	3.52456	8.50477	8.26984	6.38357	5.96827
ABHD14B	0.062419	0.425417	4.66183	4.55043	4.25	4.20174
ABHD15	0.0115747	0.0427167	9.16453	9.81829	8.77589	9.2644
ABHD16A	0.00217406	0.00697246	0.417621	0.424319	0.395052	0.410295
ABHD16B	0.432403	4.86555	5.54513	5.52594	3.9875	3.87235
ABHD17A	0.105761	1.63361	14.1232	14.1878	12.4927	12.7121
ABHD17B	-0.217346	12.3336	15.6661	15.4317	17.2402	17.395
ABHD17C	-0.268319	0.42275	0.644457	0.604289	0.696172	0.744446
ABHD18	-0.000350839	0.00118054	2.70709	2.77293	2.72761	2.52425
ABHD2	-0.00539354	0.0358851	4.62435	4.68443	4.52629	4.42549
ABHD3	0.0701374	4.1668	42.9862	43.4147	39.4428	39.4039
ABHD4	0.456329	0.403936	0.209206	0.403736	0.215346	0.212809
ABHD5	-0.250647	0.914663	1.05335	0.84446	1.12194	1.04098
ABHD6	0.172527	2.85122	6.52993	6.7075	5.57744	5.67486
ABHD8	0.0116198	0.0389132	10.6818	10.6489	10.2603	10.0117
ABI1	-0.201574	26.3341	2.63732	2.68849	2.92782	2.93958
ABI2	0.228763	12.1296	2.42083	2.38326	1.94703	1.98034
ABI3	-0.185132	2.97988	6.14235	6.06475	6.62314	6.67238
ABI3BP	0.452729	0.773009	0.0643095	0.0479507	0.0358065	0.0427373
ABL1	-0.00498202	0.0280255	6.32085	6.1902	5.86141	6.16483
ABL2	0.0109468	0.0578072	0.620269	0.603736	0.588393	0.575365
ABLIM1	-0.0621536	6.52812	2.48762	2.47825	2.47754	2.48923
ABLIM2	-0.0115955	0.00397612	0.00998163	0.00982414	0.010077	0.00905296
ABLIM3	2.062	0.831306	0.00436022	0.00268214	0.000650276	0.000963924
ABR	-0.0277359	0.57053	5.57863	5.43602	5.37767	5.3791
ABRA	0.213795	0.105647	0.160366	0.150494	0.164636	0.0923412
ABRACL	-0.260188	21.7238	105.803	108.645	122.613	123.44
ABRAXAS1	-0.075089	0.655925	6.92286	6.83707	7.22834	6.65949
ABRAXAS2	-0.0825043	1.14546	16.3637	16.5355	16.8799	16.4945
ABT1	-0.145055	5.07491	31.2398	30.7469	33.0516	32.6141
ABTB1	0.246308	0.260171	0.188897	0.242725	0.200333	0.14848
ABTB2	0.326559	1.0095	0.670084	0.663646	0.498736	0.520105
ACAA1	0.037037	0.196121	5.85118	5.98116	5.58951	5.45938
ACAA2	-0.162704	12.8643	71.3958	72.4534	77.8445	76.4243
ACACA	0.0721276	4.55343	5.24665	5.29995	4.83156	4.7798
ACACB	0.3595	9.37992	3.09007	2.93148	2.25281	2.24338
ACAD10	-0.0176212	0.0674462	3.6871	3.4301	3.46987	3.43199
ACAD8	-0.21647	4.01056	11.4585	11.393	12.866	12.5708
ACAD9	0.120385	3.70597	15.1604	15.1198	13.4421	13.2449
ACADL	0.998718	0.30214	0.0455416	0.0570475	0.0395171	0.00976289
ACADM	-0.237849	48.6254	17.753	18.0101	20.1753	20.2277
ACADS	-0.679001	9.63628	1.40584	1.43858	2.27658	2.08683
ACADSB	-0.0515777	0.22103	1.58315	1.55903	1.5567	1.56306
ACADVL	-0.0795762	0.914883	4.71931	4.69852	4.69129	4.84231
ACAP1	-0.0801808	1.59413	28.6434	28.5003	29.0716	28.8022
ACAP2	-0.101533	10.9244	40.4821	40.4681	41.5163	41.6893
ACAP3	0.204394	5.8445	12.7585	12.5626	10.4323	10.6205
ACAT1	-0.0336443	0.300782	33.7213	35.279	34.4624	33.2067
ACAT2	-0.279609	30.3926	31.3293	31.4989	36.627	36.4371
ACBD3	-0.105937	3.81312	26.918	27.1692	27.9195	27.8458
ACBD3-AS1	-0.139713	0.0866982	1.49626	1.28857	1.39469	1.54365
ACBD4	0.183905	1.19855	1.0573	0.995478	0.899933	0.831395
ACBD5	-0.0544705	0.626488	0.542473	0.53317	0.53447	0.53564
ACBD6	0.0185306	0.13153	41.2388	42.2968	39.4395	39.5694
ACBD7	-0.075901	0.507073	7.28135	7.49958	7.60332	7.32321
ACCSL	-0.590089	0.0637721	0	0.0279664	0.0135607	0.026802
ACD	0.0601575	0.421613	5.44356	5.28487	4.94427	4.91378
ACE	0.143209	1.51034	2.14841	2.1163	1.8408	1.85867
ACE2	2.14663	0.372883	0.0264824	0.00579213	0.00351071	0.00346935
ACER2	0.211666	0.256566	0.696008	0.504009	0.529226	0.463464
ACER3	-0.0486333	0.261843	0.951332	0.946638	0.911617	0.968846
ACHE	0.231741	0.0786981	0.0248452	0.026782	0.0254082	0.0167393
ACIN1	-0.0518517	2.69337	14.289	14.4542	14.2665	14.278
ACKR2	-0.143983	0.0187662	0.0208253	0.0102484	0.00828228	0.0245541
ACKR4	-0.375063	11.256	4.86039	4.64393	5.86725	5.94058
ACLY	-0.0916399	17.6846	33.4556	33.4138	34.075	34.1879
ACMSD	0.00692731	0.00317774	0.194184	0.203065	0.144801	0.233722
ACO1	0.208316	3.22627	3.7366	3.68757	3.16403	2.99258
ACO2	0.0850278	2.96779	45.9913	45.6737	41.1746	41.6139
ACOT1	-0.0291483	0.0282776	1.26368	1.14904	1.16331	1.19498
ACOT12	-0.496341	0.117316	0.051993	0.0255863	0.0434232	0.0613024
ACOT13	-0.0637308	0.594378	4.72552	4.75805	4.73227	4.76347
ACOT2	-0.285616	2.52746	2.80829	2.78205	3.39439	3.13438
ACOT4	1.00087	0.136099	0.0126009	0.0496082	0	0.0297142
ACOT6	2.00836	0.104005	0.102429	0	0.0244418	0
ACOT7	0.13556	2.93927	8.61975	8.40602	7.36331	7.48414
ACOT8	-0.0183051	0.0464607	11.532	11.1506	11.3309	10.6781
ACOT9	-0.391694	7.52657	1.86079	1.93665	2.32184	2.45086
ACOX1	0.0532328	0.416686	1.73344	1.73876	1.59675	1.60914
ACOX2	-0.0706221	0.0161417	0.0492143	0.0616481	0.0747319	0.0369258
ACOX3	0.0316676	0.101831	2.82176	2.81303	2.64213	2.63888
ACOXL	-0.571047	0.859797	0.270205	0.27452	0.37958	0.395662
ACOXL-AS1	0.309724	0.148034	0.127973	0.0881675	0.0916111	0.0754433
ACP1	-0.107554	5.93229	26.6756	26.8626	27.6752	27.5859
ACP2	-0.0725505	0.182979	0.753415	0.696349	0.717933	0.74242
ACP5	-0.33472	9.13051	2.93817	2.89182	3.49623	3.54722
ACP6	-0.144626	3.96458	3.91004	3.92816	4.10626	4.19446
ACPP	0.173728	0.0456789	0.0189222	0.0198653	0.0210711	0.0118988
ACPT	0.212788	0.983591	6.10735	5.94294	5.34359	4.61943
ACR	0.85155	0.117764	0.0300759	0.0370018	0.00897095	0.0265958
ACRBP	-0.450948	0.949358	0.596328	0.780765	0.907305	0.896617
ACRV1	-0.278264	0.16356	0.347749	0.3589	0.29677	0.523906
ACSBG1	0.528287	0.517834	0.110956	0.105793	0.0786019	0.0654113
ACSBG2	0.367094	0.846906	0.138926	0.133613	0.108232	0.0942418
ACSF2	-0.0630043	0.175061	0.687612	0.655454	0.653822	0.690133
ACSF3	-0.251704	36.985	5.97421	6.14459	6.94043	6.8832
ACSL1	0.00411104	0.0297297	5.38253	5.25729	5.08208	5.0818
ACSL3	-0.0173558	0.196237	15.2109	15.5406	14.9064	14.9113
ACSL4	-0.215363	29.9747	8.27012	8.31705	9.19764	9.25147
ACSL5	0.175038	9.14032	11.6565	12.292	10.2315	10.0914
ACSL6	-1.31426	0.352528	0.00185432	0.000260724	0.00284452	0.00218634
ACSM2A	0.486512	0.0869277	0.00682938	0.00896216	0.00543212	0.00536813
ACSM2B	-0.314767	0.0374381	0.00852089	0.00419323	0.00508317	0.0100466
ACSM3	-0.00584701	0.0055495	0.62211	0.554634	0.59912	0.532856
ACSM5	0.494305	0.0516171	0.00453782	0.00334967	0	0.00535033
ACSM6	-0.839106	0.336503	0.0542719	0.0830909	0.0503628	0.184858
ACSS1	0.374361	31.4438	5.91006	6.05997	4.43908	4.40779
ACSS2	0.151106	2.04865	3.84543	3.68256	3.34635	3.14873
ACSS3	-0.0984141	0.0112401	0.00256607	0.00336744	0.00306159	0.00302553
ACTA1	-0.146049	0.0487816	0.20043	0.108837	0.131936	0.195573
ACTA2	0.43185	0.819411	0.315208	0.324908	0.21599	0.238557
ACTA2-AS1	0.194508	0.292819	0.982024	1.06566	0.88926	0.825345
ACTB	-0.24936	301.95	811.605	804.203	921.791	918.243
ACTC1	1.49248	0.444374	0.038982	0.0191835	0.00664425	0.013132
ACTG1	-0.294901	inf	177.901	177.273	208.341	209.09
ACTG1P17	0.197462	0.192937	0.977172	0.649337	0.712889	0.645783
ACTG1P20	0.218644	1.04148	2.78363	2.93785	2.27724	2.433
ACTG1P4	0.404302	0.1406	0.0983879	0.0968356	0.0803176	0.061055
ACTL10	0.169633	0.778541	4.31398	4.31568	3.63071	3.71928
ACTL6A	-0.0659401	3.2259	38.2495	38.2224	38.0717	38.6142
ACTL6B	0.796046	0.242534	0.0504593	0.0364196	0.0321084	0.0158651
ACTL7A	-0.805666	0.188206	0.0336065	0.0330762	0.0641538	0.0475485
ACTL8	-1.1464	0.581096	0.0662869	0.0326205	0.0922685	0.117233
ACTN1	0.540417	0.205554	0.0156314	0.0208147	0.0153588	0.00867307
ACTN2	1.26409	0.463295	0.00759179	0.0108684	0.00329375	0.00406869
ACTN3	-0.0597467	0.0112331	0.00922347	0.0113474	0.0151313	0.00543747
ACTN4	0.0417581	1.68356	37.089	36.9554	34.8141	34.0997
ACTR10	-0.0146349	0.0989407	27.5903	27.7291	26.498	27.0381
ACTR1A	-0.0820147	3.13102	46.3396	46.0002	47.0903	46.5482
ACTR1B	0.0347763	0.368576	37.3904	38.7381	35.1992	35.9963
ACTR2	-0.17756	54.1749	59.5239	60.2932	64.9769	64.8458
ACTR3	-0.26201	113.503	27.0004	27.0629	30.8501	31.257
ACTR3B	-0.105948	0.716511	0.735138	0.662314	0.729819	0.710908
ACTR3BP2	2.68713	0.656531	0.0997939	0.022666	0.00915882	0.00905093
ACTR3C	-0.168921	1.0944	0.091903	0.0965647	0.104118	0.0988893
ACTR5	-0.135163	2.01085	13.1471	13.5613	14.0945	14.0069
ACTR6	-0.0364383	0.253698	7.11046	7.05589	6.96883	6.94985
ACTR8	-0.00877044	0.0516696	17.8581	18.3559	17.5669	17.3399
ACTRT3	-0.437479	1.49875	1.07199	1.01469	1.34632	1.36069
ACVR1	0.649801	0.985435	0.0492286	0.0396424	0.0266977	0.0275558
ACVR1B	0.0982022	0.661099	1.60984	1.54548	1.43408	1.38988
ACVR1C	0.674972	0.1791	0.00207372	0.00495671	0.00282762	0.00139715
ACVR2A	0.38504	1.84723	0.29324	0.284124	0.213808	0.209752
ACVR2B	0.458828	25.9246	4.79839	4.77869	3.48435	3.19195
ACVR2B-AS1	0.56217	0.528257	0.208125	0.269105	0.146068	0.163593
ACVRL1	-1.32212	0.258641	0.00245243	0.0036206	0.00877803	0.00578308
ACY1	0.425843	0.601183	0.156603	0.167084	0.0910668	0.139646
ACY3	-0.177125	4.15861	31.3701	30.3123	33.4757	33.3342
ACYP1	0.116692	1.01904	6.00646	6.02154	5.37631	5.25177
ACYP2	-0.102866	0.633347	2.44539	2.25805	2.44445	2.39433
ADA	0.259585	32.3277	27.5473	27.6318	22.425	21.7347
ADA2	0.206197	3.94432	1.22869	1.22837	1.02675	1.0137
ADAD1	3.58559	0.786109	0.0122059	0.0137295	0.00208042	0
ADAL	-0.147888	1.98304	1.43309	1.4377	1.52836	1.51883
ADAM10	-0.0955881	3.61525	12.0345	11.7847	12.1111	12.2703
ADAM11	0.33046	0.590075	0.242921	0.195409	0.179751	0.154224
ADAM12	1.91828	0.945591	0.00783168	0.00501027	0.00233601	0.000923396
ADAM15	0.0319493	0.365655	2.616	2.64063	2.44886	2.47675
ADAM17	-0.167902	22.3865	48.6818	48.6015	52.2631	52.4381
ADAM18	1.6787	0.409222	0.0100795	0.00992043	0.0045097	0.00148553
ADAM19	0.000551939	0.0055495	33.7576	33.256	32.2038	31.9714
ADAM1A	-0.107443	0.416709	3.35848	3.45848	3.48511	3.55062
ADAM2	0.783712	0.247138	0.0146506	0.0222846	0.0143016	0.00628139
ADAM20	0.376992	0.179309	0.103002	0.115859	0.0877803	0.0737343
ADAM20P1	0.891808	0.445881	0.0778044	0.069918	0.0443964	0.031908
ADAM21	-0.16449	0.0694669	0.11181	0.113841	0.110401	0.13183
ADAM21P1	-1.13863	0.414214	0.0501143	0.0147971	0.0717501	0.0649961
ADAM22	0.0153998	0.0767219	0.55482	0.532982	0.511047	0.519956
ADAM23	0.20502	9.949	13.4804	13.1096	10.9376	11.1602
ADAM28	1.83321	23.5283	0.19881	0.166744	0.0457843	0.0524649
ADAM29	0.591632	0.200135	0.00635506	0.00804187	0.00487431	0.00428168
ADAM32	0.47304	0.593103	0.167883	0.201506	0.131907	0.123111
ADAM3A	0.160876	0.0171759	0.00199309	0.00490411	0.00356695	0.00234996
ADAM5	0.677275	0.112934	0.0242921	0.0478177	0.0217373	0.0214812
ADAM6	1.13904	0.193999	0.0278746	0.0329217	0.0133029	0.0131462
ADAM7	0.681555	0.101389	0.0182515	0.0119757	0.010888	0.00717315
ADAM8	-0.0423656	0.0863375	0.765552	0.764221	0.793511	0.715919
ADAM9	0.0713159	1.52115	5.66612	5.69127	5.14408	5.21156
ADAMDEC1	-0.738581	0.106441	0.00441564	0.00434597	0.0122928	0.00173542
ADAMTS1	0.68329	0.0755958	0.0154769	0.00217611	0.0105518	0
ADAMTS10	1.09043	0.239754	0.00766842	0.0166043	0.00731939	0.00361659
ADAMTS12	1.07255	0.29142	0.00445727	0.00712878	0.0013295	0.00394151
ADAMTS13	0.159251	0.224566	0.125713	0.120228	0.104002	0.106972
ADAMTS14	0.191998	0.0264602	0.00278016	0.00638468	0.00331702	0.0043706
ADAMTS16	4.06934	2.25219	0.014695	0.0289263	0.00125234	0.00123758
ADAMTS17	1.26747	0.185135	0.00971914	0.0047829	0.00386532	0.0019099
ADAMTS18	1.26692	0.280896	0.00696769	0.00600054	0.0020783	0.00308073
ADAMTS19	0.801534	0.129267	0.013787	0.0116309	0	0.0139333
ADAMTS20	1.64147	0.836669	0.0354085	0.0232332	0.0100586	0.00795209
ADAMTS3	2.55399	0.846474	0.0230042	0.0156747	0.0063338	0
ADAMTS4	-0.661319	0.184047	0.00963814	0.00830031	0.017249	0.00994338
ADAMTS5	2.9271	0.832598	0.00637809	0.0136012	0	0.0025067
ADAMTS6	-0.115634	1.01111	1.67594	1.6097	1.7592	1.65135
ADAMTS7	1.29982	0.575168	0.0261346	0.0422579	0.0222724	0.004402
ADAMTS9	0.981709	0.365527	0.010646	0.0118751	0.00254035	0.00836809
ADAMTSL1	1.25761	0.170432	0.00318081	0.00626125	0.00379505	0
ADAMTSL2	1.28248	1.55951	0.0701342	0.0533987	0.0221035	0.0265238
ADAMTSL3	0.0885139	0.0631445	0.0669476	0.0693592	0.0538109	0.068964
ADAMTSL4	0.185197	0.168797	0.0836244	0.0673994	0.0534217	0.073754
ADAMTSL4-AS1	0.215698	0.4403	2.70509	2.79944	2.2782	2.26309
ADAMTSL5	0.142391	0.05069	0.126263	0.0710122	0.0860833	0.0850692
ADAP1	-0.103326	0.0313696	0.0173646	0.0170906	0.0161138	0.0193363
ADAP2	0.493536	0.246743	0.0196965	0.0238594	0.0135577	0.0160776
ADAR	-0.00797795	0.149499	12.9633	13.2054	12.6193	12.5903
ADARB1	-0.313001	2.17028	0.130266	0.130626	0.161521	0.149009
ADARB2	0.600353	0.125765	0.0134146	0.00720163	0.00727504	0.00575147
ADAT1	-0.0041176	0.0225002	1.17571	1.1715	1.12375	1.13131
ADAT2	0.0575424	0.487009	3.1269	3.20019	2.86313	2.96117
ADAT3	-0.442816	2.16154	1.26885	1.00625	1.36503	1.5965
ADCK1	0.395391	3.26936	1.93754	1.8165	1.3824	1.35185
ADCK2	-0.114766	4.3727	40.6659	41.4435	42.365	42.811
ADCK5	0.0371001	0.149636	12.6511	11.6886	11.5813	11.1443
ADCY1	-0.0514387	0.0281144	0.0420246	0.0427878	0.039766	0.0444234
ADCY10	0.110801	0.0411132	0.0156078	0.0217622	0.016294	0.0168688
ADCY10P1	0.184011	0.430639	0.900814	0.833272	0.767691	0.694762
ADCY2	2.26783	0.854047	0.0204388	0.0170215	0.00187582	0.00556117
ADCY3	0.0999608	3.34886	11.5168	11.481	10.1323	10.4241
ADCY4	-0.262795	0.177963	0.0538788	0.0462796	0.070127	0.0450456
ADCY5	0.496195	0.218926	0.028461	0.0180722	0.0186216	0.0129898
ADCY6	1.8771	0.593241	0.0168806	0.0215986	0.0100702	0
ADCY7	0.367946	42.7752	13.2624	13.2202	10.018	9.64254
ADCY8	-1.16205	0.19941	0.0100548	0.00247403	0.0119964	0.0148189
ADCY9	0.0387559	0.0365768	0.231446	0.230412	0.223768	0.207017
ADCYAP1R1	1.68004	0.319436	0.00197358	0.00271942	0.000470939	0.000930782
ADD1	-0.12496	6.96556	6.14984	6.24757	6.43433	6.51719
ADD2	1.6836	0.41012	0.00476678	0.003649	0.00063192	0.00187343
ADD3	-0.128547	9.15091	4.94359	4.94646	5.16477	5.19296
ADD3-AS1	-0.433692	1.23024	1.30406	1.52909	1.91123	1.75585
ADGB	0.934853	0.336615	0.0371226	0.0230759	0.02098	0.00921462
ADGRA2	0.00190009	0.00192555	0.472646	0.451754	0.443805	0.440589
ADGRA3	0.996382	0.148549	0.00451337	0.0177687	0.00538494	0.0053215
ADGRB1	-0.151242	0.113818	0.13814	0.146984	0.158134	0.145266
ADGRB2	0.184801	0.37048	0.405135	0.314846	0.322246	0.284572
ADGRB3	1.32123	0.44351	0.0201423	0.0252312	0.0131083	0.00431797
ADGRD1	0.280899	5.56848	2.44186	2.47707	1.87363	2.00474
ADGRD1-AS1	0.263721	0.20934	0.729342	0.532825	0.385751	0.620569
ADGRE1	-0.398083	0.147499	0.0163679	0.00770464	0.0127361	0.0176205
ADGRE2	0.180025	0.0627436	0.0165073	0.0251826	0.0216645	0.0136241
ADGRE3	-1.0581	0.197679	0.00306783	0.00603885	0.00732049	0.0108514
ADGRE4P	-1.05373	0.258221	0.0264521	0.0074385	0.045086	0.0222774
ADGRE5	0.229599	6.04548	3.86996	3.90797	3.20195	3.15333
ADGRF1	0.442222	0.106922	0.0193818	0.0132065	0.00889406	0.0140629
ADGRF2	0.743893	0.205759	0.0240784	0.0217236	0.0167581	0.00946322
ADGRF3	0.0810604	0.17737	0.247748	0.235865	0.218767	0.219206
ADGRF5	-0.904556	0.29524	0.00711995	0.00525571	0.0138042	0.0083948
ADGRG1	1.35811	0.320399	0.00164795	0.00208536	0.000561765	0.000832721
ADGRG2	1.41697	1.01884	0.0052714	0.00896148	0.00114352	0.00395516
ADGRG4	1.0987	0.436777	0.0196875	0.0132579	0.00494512	0.00977373
ADGRG5	-1.16057	2.06159	0.0277953	0.0332189	0.0675099	0.0632033
ADGRG6	0.999628	0.313988	0.00410776	0.00514557	0.00311881	0.00132089
ADGRG7	0.182162	0.0351602	0.013226	0.0185962	0.0112715	0.0155942
ADGRL1	0.317914	1.35745	0.908835	1.07843	0.749492	0.777773
ADGRL2	2.07284	0.613282	0.0014188	0.00279283	0	0.00095591
ADGRL3	2.04241	1.15008	0.00432861	0.0053254	0.000968343	0.00127592
ADGRL4	1.13537	0.18902	0.00854335	0.0224228	0.00679542	0.00671537
ADGRV1	0.233138	0.105896	0.00881943	0.00868028	0.00701502	0.00724749
ADH1B	0.530805	0.0709971	0.011223	0.00552295	0.00669511	0.00441082
ADH4	-0.321726	0.0455766	0.00327329	0.0112758	0.00390539	0.0135078
ADH5	-0.0602932	1.79911	52.6495	53.3941	52.9349	52.9938
ADH6	1.53036	0.413131	0.0154966	0.0122017	0.00369783	0.0054814
ADHFE1	0.581999	0.424912	0.272818	0.252403	0.10416	0.2316
ADI1	-0.220003	7.1323	6.98088	7.00715	7.72393	7.88405
ADIPOQ	0.13494	0.018536	0.00446235	0.00768591	0.0079861	0.00263067
ADIPOQ-AS1	0.494365	0.0850494	0.0287732	0.0113277	0.00686591	0.0203551
ADIPOR1	-0.0989464	2.72047	9.96669	10.0037	10.0684	10.4209
ADIPOR2	-0.236847	28.3248	36.9322	38.0675	42.1423	42.5297
ADK	-0.00670814	0.036111	7.04897	6.9269	6.86909	6.583
ADM	0.840091	70.4344	29.5736	28.0561	15.6039	15.237
ADM2	1.81481	21.196	0.970554	0.93769	0.249223	0.270315
ADM5	0.174751	1.25056	6.65419	6.80294	5.52492	5.8957
ADNP	-0.115244	6.25893	4.35777	4.4537	4.55113	4.59249
ADNP2	-0.298917	22.5104	12.7859	12.6067	14.941	14.9853
ADNP-AS1	-0.0601114	0.0863375	1.16979	1.32738	1.18655	1.30754
ADO	-0.0924486	2.30583	21.4007	21.991	22.0568	22.265
ADORA1	2.27054	0.423011	0.0126575	0.00889841	0	0.00426395
ADORA2A	-0.192714	0.24118	0.094726	0.0793971	0.0933312	0.0972757
ADORA2A-AS1	0.142403	0.266076	0.805805	0.68665	0.645158	0.650059
ADORA2B	0.31562	0.186286	0.283429	0.203854	0.195093	0.179942
ADORA3	-1.32265	0.489967	0.00814686	0.00962198	0.0311042	0.0115267
ADPGK	-0.070848	1.57327	12.2376	12.0059	12.2776	12.1171
ADPGK-AS1	0.317783	0.746882	0.888216	0.940879	0.678052	0.727752
ADPRH	0.0748131	0.140648	0.475736	0.506609	0.419887	0.473561
ADPRHL1	0.0157076	0.0186391	0.83224	0.927978	0.867261	0.80115
ADPRHL2	-0.0128958	0.0569683	21.7999	21.2581	20.9443	20.676
ADPRM	-0.176558	0.372604	2.37943	2.54872	2.31319	3.02128
ADRA1A	1.20736	0.367763	0.00546217	0.00413537	0.00100261	0.00297239
ADRA2A	0.3557	0.0427106	0.0106027	0.0104354	0.0126502	0.00312528
ADRA2B	0.173809	0.0273404	0.0366551	0.00601279	0.0145778	0.0216091
ADRB1	0.418012	0.250485	0.157843	0.127107	0.111282	0.0930528
ADRB2	0.311868	0.32361	0.522977	0.435537	0.38398	0.35574
ADRM1	-0.0787095	2.80641	22.5195	22.4543	22.7776	22.7239
ADSL	0.120245	9.31536	30.6525	31.1161	26.9825	27.4602
ADSS	-0.0447211	0.913892	47.0323	46.7572	45.8814	46.7962
ADSSL1	-0.080699	0.0181778	0.0244278	0.0240423	0.0358707	0.013293
ADTRP	4.49159	2.98542	0.0984433	0.058134	0	0.00663256
AEBP1	0.394109	6.56202	3.9766	3.97101	2.80754	2.98583
AEBP2	-0.0856143	1.3945	3.58031	3.59917	3.63066	3.66786
AEN	0.0191368	0.202877	39.1507	38.4486	37.161	36.2022
AES	-0.037658	1.06929	42.4826	42.3441	41.3434	42.0687
AFAP1	0.319442	0.0846677	0.0094203	0.00927167	0.00481689	0.0095203
AFAP1-AS1	0.255614	0.200549	0.117866	0.105596	0.102766	0.0766118
AFAP1L1	0.249156	0.179309	0.0374988	0.0326892	0.0319572	0.024633
AFAP1L2	0.183094	1.37782	0.177028	0.191218	0.152958	0.157787
AFDN	0.187578	9.72918	4.02901	3.97255	3.33822	3.39254
AFDN-AS1	1.84469	0.487229	0.0177798	0.0612476	0.0106066	0.0104817
AFF1	0.333026	15.6881	1.36569	1.4052	1.06015	1.04733
AFF1-AS1	0.397233	1.26126	1.5115	1.43564	1.07825	1.06554
AFF2	0.106031	8.28324	2.72156	2.73142	2.43986	2.41412
AFF3	0.306367	45.6647	10.1133	10.3084	7.98225	7.8397
AFF4	-0.0507385	0.766301	9.15429	8.93271	8.90827	9.03879
AFG1L	-0.105819	0.314255	0.496054	0.523952	0.503536	0.547952
AFG3L1P	0.0337125	0.187414	4.37003	4.40709	4.17817	4.03672
AFG3L2	-0.0431078	1.11069	51.7254	51.6751	50.7768	51.2856
AFM	0.00182461	0.000113547	0.0310699	0.0203864	0.0370697	0.012211
AFMID	0.0524392	0.302688	7.08334	7.48993	6.71345	6.75023
AFTPH	-0.232098	27.6421	11.2082	11.3568	12.7164	12.675
AGA	0.127012	1.33795	4.47674	4.47319	4.02228	3.82986
AGAP1	0.599228	0.126541	0.00433769	0.00298848	0.00258766	0.00204575
AGAP11	-0.401923	0.0983036	0.0261239	0.0289256	0.0311686	0.0385017
AGAP12P	0.33987	0.134711	0.101141	0.132727	0.0861944	0.0908576
AGAP2	0.019691	0.128673	5.67804	5.73911	5.51334	5.27699
AGAP2-AS1	-1.46786	0.275647	0	0.033033	0.0640698	0.0237432
AGAP3	-0.00534802	0.0148469	0.850591	0.798492	0.773637	0.811888
AGAP4	0.103574	0.270543	1.07774	0.974658	0.841185	0.98833
AGAP5	0.201805	0.604805	1.90582	2.0345	1.64082	1.64151
AGAP6	0.235818	2.72587	6.10829	6.28236	5.01067	5.06985
AGAP7P	0.126407	0.112639	0.513171	0.492447	0.443894	0.438665
AGAP9	0.663678	0.963071	0.189824	0.165598	0.110666	0.104276
AGBL2	0.465143	0.59211	0.335988	0.243069	0.178164	0.223467
AGBL3	0.279087	1.49053	0.534023	0.491953	0.406033	0.403937
AGBL4	1.89965	0.411967	0.00276214	0.00679639	0.000823881	0.00162835
AGBL5	-0.00334885	0.0171025	5.02396	5.03452	4.91931	4.7398
AGBL5-AS1	0.53194	0.193677	0.633544	0.548722	0.665179	0.119517
AGER	0.250293	1.22043	0.0704365	0.0659091	0.0544422	0.0553655
AGFG1	-0.0268836	0.320197	3.00874	2.99577	2.93375	2.92686
AGFG2	0.00537116	0.019736	6.79665	6.641	6.52201	6.30397
AGGF1	-0.124084	7.34846	29.6483	29.974	31.0221	31.2275
AGK	0.0971654	0.577609	6.29071	6.48314	5.77539	5.66576
AGL	-0.0535573	1.12241	3.07192	3.11828	3.0571	3.09749
AGMAT	0.15068	1.17039	5.61275	5.46642	4.66934	4.8912
AGMO	-0.50962	0.0737762	0.0166749	0.0123089	0.0149212	0.0245757
AGO1	0.00911008	0.0551542	2.90896	2.92931	2.78701	2.77103
AGO2	0.133156	6.36763	3.98641	3.92072	3.47263	3.43466
AGO3	-0.0384696	0.286247	6.47552	6.54373	6.44299	6.36709
AGO4	-0.264245	8.57173	2.84276	2.89042	3.30382	3.29286
AGPAT1	0.324888	8.96356	1.10487	1.07935	0.863033	0.807681
AGPAT2	-0.0558814	0.398681	11.6197	12.2779	11.8889	11.9108
AGPAT3	0.0261122	0.383683	11.2786	11.0827	10.58	10.4582
AGPAT4	0.691465	2.92617	0.314293	0.332438	0.206942	0.176827
AGPAT4-IT1	1.0241	0.478835	0.14979	0.0873641	0.0264764	0.0850347
AGPAT5	-0.00832964	0.110189	42.2642	42.9043	41.0711	40.9957
AGPS	0.0040837	0.0441135	28.1495	27.8481	26.6386	26.8551
AGRN	0.212706	0.751605	0.41348	0.400748	0.31021	0.362744
AGRP	0.424865	0.318068	0.688729	0.770902	0.62838	0.413985
AGT	-0.051177	0.00539246	0.0199212	0.00392138	0.0142609	0.00939526
AGTPBP1	-0.0255466	0.313228	7.02026	7.20767	6.83936	7.03457
AGTR2	0.0986235	0.0112401	0.021264	0.00697616	0.0169135	0.00835711
AGTRAP	0.134214	0.916624	2.71976	2.78149	2.43679	2.36563
AGXT2	2.01034	0.314344	0.0167507	0.00706562	0	0.00564285
AHCTF1	-0.10709	8.99438	6.14609	6.19993	6.40538	6.33403
AHCTF1P1	-0.184893	0.696552	0.645892	0.647135	0.706862	0.701275
AHCY	-0.0177852	0.421068	22.851	22.9169	22.345	22.0463
AHCYL1	0.015198	0.131762	4.85739	4.799	4.58209	4.57185
AHCYL2	0.0281936	0.12068	1.31851	1.32291	1.26033	1.22134
AHDC1	0.33254	4.01056	2.18326	2.38103	1.69094	1.78153
AHI1	0.0337927	0.186889	1.2668	1.24746	1.13289	1.21979
AHNAK	3.04303	30.7042	0.0575378	0.0522195	0.00684349	0.00591751
AHNAK2	1.35537	0.58626	0.00337622	0.00553824	0.00201409	0.00132691
AHR	-0.0254845	0.140185	7.42435	7.65548	7.64058	7.06544
AHRR	-0.404401	0.448989	0.0538594	0.0664867	0.0718841	0.0807242
AHSA1	0.00250743	0.028243	91.6692	90.406	87.2389	86.8875
AHSA2	0.101579	2.51237	3.88001	3.8901	3.5341	3.4041
AICDA	-0.107123	3.56018	16.8897	16.6412	17.0865	17.5109
AIDA	-0.122923	1.27004	8.75268	8.53366	9.22897	8.8052
AIF1	-0.363693	1.50102	0.283375	0.326003	0.388475	0.362878
AIF1L	-0.143908	0.0430044	0.0126875	0.0132218	0.0115757	0.0158391
AIFM1	-0.0844979	1.87281	6.73264	6.8145	6.85766	6.90362
AIFM2	-0.0719518	0.236886	1.90885	1.78674	1.76527	1.95553
AIFM3	0.592272	0.381177	0.0504452	0.035618	0.0353269	0.0193949
AIG1	0.370228	1.04555	0.314678	0.274404	0.239697	0.196992
AIM2	1.14747	2.05032	0.267257	0.292267	0.0930026	0.148802
AIMP1	-0.0390677	0.448476	9.36812	9.51363	9.39043	9.19601
AIMP2	0.0666975	0.55541	5.56146	5.89375	5.23249	5.24651
AIP	-0.0147424	0.123444	25.0041	25.2731	24.4036	24.2585
AIRE	0.739723	0.218949	0.0538998	0.0574701	0.0267951	0.0370712
AIRN	0.43114	0.412504	0.119118	0.120687	0.0898703	0.0805501
AJUBA	0.584257	0.906636	0.120849	0.0994794	0.0773363	0.0634718
AK1	0.218608	0.254813	0.204965	0.210697	0.186579	0.155739
AK2	-0.0140204	0.320623	13.0918	13.1666	12.6675	12.7341
AK3	-0.0227078	0.186597	3.55727	3.64442	3.47123	3.53754
AK4	-0.296832	7.50081	0.978843	1.00288	1.12537	1.20671
AK5	0.314582	0.343304	0.150411	0.157814	0.142211	0.0953633
AK6	-0.123751	2.74167	26.9154	27.0962	27.513	28.8622
AK7	0.0851817	0.0241983	0.011845	0.0134989	0.00669429	0.0161711
AK9	0.0584225	0.114097	0.304268	0.318352	0.284532	0.288291
AKAIN1	-0.323923	0.0374489	0.00188527	0.00927763	0.00449866	0.00889133
AKAP1	-0.0201926	0.237776	11.2676	11.6529	11.0512	11.2168
AKAP10	-0.0621469	0.329068	2.91068	2.85959	2.96748	2.80421
AKAP11	-0.111984	12.0793	26.8225	26.853	27.6661	27.9057
AKAP12	0.270721	0.20436	0.0542255	0.0388145	0.0448467	0.0290612
AKAP13	-0.108681	19.9012	12.8152	12.7767	13.21	13.2257
AKAP14	0.685272	0.205968	0.104997	0.041336	0.0375816	0.0495186
AKAP2	-0.113121	0.210096	0.169631	0.186911	0.175245	0.194173
AKAP3	0.242737	0.22405	0.129721	0.173272	0.114236	0.131098
AKAP5	-0.31203	3.85554	1.73615	1.80222	2.11862	2.08994
AKAP6	0.416482	0.138322	0.015831	0.0185027	0.0129855	0.011666
AKAP7	-0.615744	0.550313	0.0388864	0.0459274	0.0634073	0.0611321
AKAP8	-0.121697	4.33189	23.726	23.8039	24.6121	24.9292
AKAP8L	-0.0125013	0.0863518	12.957	13.6222	12.8342	12.8519
AKAP9	0.0335634	1.14266	11.3062	11.3645	10.5904	10.6291
AKIP1	0.0718229	0.208362	1.19023	1.17924	1.07843	1.08129
AKIRIN1	-0.15034	8.30703	20.1459	19.7595	21.1802	21.2476
AKIRIN2	0.129287	1.84678	19.664	19.5582	17.6341	16.723
AKNA	0.0775246	5.49149	17.7331	17.7909	15.9932	16.2581
AKNAD1	0.419019	0.0591951	0.00863197	0.00849578	0.00411955	0.00814203
AKR1A1	0.0691494	1.50662	16.438	16.1855	14.8951	14.8956
AKR1B1	-0.0967264	5.3816	32.6013	32.6949	33.4559	33.4371
AKR1B10	0.675822	0.119471	0.0388275	0.0509532	0.0463254	0.00762995
AKR1B15	-0.316495	0.0377894	0.0254517	0.0125251	0.022775	0.0225067
AKR1C2	3.26767	0.595134	0.00715969	0.00352336	0.00106778	0
AKR1C3	2.13553	0.367763	0.0147973	0.0174766	0.00706191	0
AKR1C6P	0.263348	0.0332819	0.0148101	0.0510176	0.00883503	0.0436548
AKR1C8P	0.524611	0.068917	0.0193741	0.0238355	0.0231153	0.00571076
AKR1D1	3.49027	0.725431	0.0103946	0.00767298	0	0.00153198
AKR7A2	-0.0983619	1.49588	9.07871	9.35373	9.33229	9.57216
AKR7A2P1	-0.128542	0.189267	1.69893	1.89355	1.82338	1.9391
AKR7A3	0.156874	0.0830362	0.399225	0.392926	0.347315	0.333418
AKR7L	0.00975583	0.00312545	0.103082	0.136745	0.07308	0.155007
AKT1	0.0288738	0.497364	19.6028	19.1533	18.2659	18.127
AKT1S1	0.0475573	0.231413	2.34257	2.38127	2.21206	2.16692
AKT2	0.0288816	0.416709	6.81873	6.6294	6.35232	6.27573
AKT3	0.356275	0.215114	0.0436319	0.0458715	0.0248456	0.0420908
AKTIP	0.0105726	0.031554	2.37166	2.43745	2.3029	2.27089
ALAD	-0.148667	1.58202	2.17895	2.22276	2.31409	2.36052
ALAS1	0.0323223	0.200807	4.46906	4.42007	4.11614	4.21076
ALAS2	-0.721136	0.347749	0.0276735	0.0204277	0.0433354	0.0326285
ALB	0.0995101	0.0112492	0.0221194	0.0130623	0.0105563	0.020864
ALCAM	-0.0116609	0.0920122	6.71053	6.79363	6.42116	6.62065
ALDH16A1	-0.0438945	0.318812	7.12103	6.87792	6.8908	6.93413
ALDH18A1	-0.0619908	3.23928	6.92173	6.99459	6.95325	6.96431
ALDH1A1	5.21452	41.6913	1.85578	1.74932	0.0623702	0.0308177
ALDH1A2	0.333734	0.0493098	0.00367891	0.00434503	0.00175573	0.00433762
ALDH1A3	0.318896	1.04134	0.519893	0.516102	0.413526	0.382233
ALDH1L2	0.105845	0.0992588	0.115073	0.103819	0.0792711	0.115487
ALDH2	0.0638241	1.38722	25.713	25.5986	23.7072	23.3238
ALDH3A2	-0.120793	1.47207	4.06351	3.95498	4.1612	4.1912
ALDH3B1	0.449741	1.11861	0.152051	0.144466	0.0978909	0.11005
ALDH3B2	0.268274	0.806828	0.717077	0.737306	0.575942	0.580966
ALDH5A1	-0.180368	75.354	59.8453	60.0006	65.3363	64.7703
ALDH6A1	0.0563624	0.298302	1.71154	1.68239	1.58046	1.54644
ALDH7A1	2.76637	0.705401	0.00352356	0.00832311	0	0.00166178
ALDH8A1	0.534331	0.155963	0.0125794	0.0275132	0.0150086	0.0115358
ALDH9A1	0.0195898	0.131913	23.8009	23.6729	22.4933	22.3741
ALDOA	-0.298956	261.214	92.125	91.6525	108.979	107.625
ALDOB	-0.82755	0.58603	0.114651	0.0543315	0.141858	0.145193
ALDOC	-1.03306	247.551	28.59	28.8772	56.6552	56.01
ALG1	0.0426369	0.246142	4.24277	4.17054	3.94624	3.87919
ALG10	0.0325615	0.203566	13.1414	13.2218	12.4296	12.2638
ALG10B	0.2051	4.3242	2.15538	2.15774	1.82597	1.75868
ALG11	-0.0374053	0.0831728	2.03921	2.1677	2.05583	2.0805
ALG12	0.00731987	0.0245221	11.2103	11.3668	11.1623	10.3599
ALG13	-0.140282	2.91217	0.983554	1.00332	1.05877	1.03917
ALG14	-0.199407	1.15698	2.90639	2.79085	3.20616	3.06105
ALG1L	-0.241945	0.0854835	0.107533	0.117596	0.128298	0.126787
ALG1L2	0.567468	0.314033	0.352438	0.29432	0.216619	0.201475
ALG1L9P	0.351954	0.361973	0.165898	0.19514	0.118278	0.152665
ALG2	0.00787376	0.0361805	6.9888	6.96887	6.59235	6.70618
ALG3	0.265528	13.2528	10.5611	10.7411	8.57966	8.39836
ALG5	-0.148538	1.55591	9.39078	9.02899	9.75611	9.80309
ALG6	-0.0509476	0.413811	12.3736	12.675	12.3548	12.5049
ALG8	-0.119111	2.48858	14.9917	15.0686	15.5962	15.6806
ALG9	0.145624	2.92258	0.362447	0.358428	0.314884	0.309429
ALK	-0.571074	0.101674	0.00164583	0.0161987	0.0196365	0.00582157
ALKAL2	0.46084	0.857977	1.01012	1.03772	0.72135	0.704159
ALKBH1	-0.132027	1.32944	8.92229	9.44737	9.68137	9.60487
ALKBH2	-0.127769	3.0128	10.8922	10.9774	11.54	11.3523
ALKBH3	-0.0341295	0.0713442	5.43783	6.32395	5.58463	5.95352
ALKBH3-AS1	0.422692	0.261674	0.21371	0.220855	0.172111	0.138586
ALKBH4	0.0281792	0.112755	11.0775	11.0744	10.4762	10.3356
ALKBH5	-0.054678	1.80969	50.6436	51.5178	51.1491	50.5077
ALKBH6	-0.033694	0.0857325	3.844	4.31015	4.02235	3.97496
ALKBH7	-0.162181	2.07543	18.369	19.1068	19.6369	20.5363
ALKBH8	0.0250596	0.158122	6.06965	6.23139	5.73854	5.84315
ALMS1	0.154233	9.87113	10.9938	11.3521	9.54926	9.6882
ALMS1-IT1	0.126125	0.162059	1.22531	1.17152	1.07208	1.03193
ALMS1P1	0.469573	0.100915	0.0518027	0.0701049	0.0231773	0.0610781
ALOX12	0.26588	0.4729	0.919504	0.853282	0.68436	0.727924
ALOX12-AS1	-0.107236	0.052054	0.649383	0.935322	1.03934	0.597585
ALOX12B	0.0313781	0.0386945	1.2463	1.23882	1.12261	1.2067
ALOX12P2	0.853726	0.11927	0.0124254	0.0061147	0.00494163	0.00488341
ALOX15	-0.722419	0.226398	0.0153759	0.0567499	0.0779666	0.036258
ALOX15P1	-0.256233	0.278701	1.47719	1.39331	1.52378	1.75983
ALOX5	-0.0266132	0.234153	6.3885	6.31363	6.33773	6.05831
ALOX5AP	0.0910573	0.897429	15.6224	15.5854	14.0862	13.983
ALOXE3	-0.00249831	0.000130876	0.0046666	0.0107169	0.00927959	0.00550217
ALPK1	-0.097771	1.63548	3.099	3.13888	3.19701	3.19809
ALPK2	1.41547	0.20367	0.00281691	0.0110899	0	0.00498193
ALPK3	-0.00210492	0.000401946	0.0207094	0.0398389	0.038186	0.019978
ALPL	-0.128423	0.0161417	0.00420058	0.0068905	0.00501174	0.0066036
ALS2	0.174749	0.873643	0.967315	1.00064	0.810759	0.859411
ALS2CL	1.9429	0.725668	0.00588105	0.00578826	0.00175418	0.00115568
ALS2CR12	-0.0570577	0.0311877	0.0666776	0.0729173	0.0721874	0.0669695
ALX3	0.121502	0.162513	1.62237	1.50083	1.40398	1.34639
ALX4	-0.735511	0.249775	0.0131534	0.0203435	0.0224192	0.0310171
ALYREF	-0.0988041	6.60801	174.826	174.003	178.068	179.797
AMACR	0.366862	0.414214	0.100038	0.111735	0.0844877	0.0728902
AMBN	0.648591	0.987833	0.417967	0.553575	0.332453	0.261612
AMBRA1	0.0251762	0.197068	3.17947	3.17555	3.01583	2.96719
AMD1	-0.217076	52.0623	18.3282	18.5586	20.4851	20.5915
AMDHD1	-0.0917866	0.0633315	0.376373	0.441673	0.379968	0.455142
AMDHD2	-0.022493	0.0534479	2.15568	2.30633	2.23855	2.10392
AMER1	0.282221	5.18072	3.03367	3.06479	2.29501	2.50882
AMER2	-0.320788	0.0564411	0.00199872	0.00393436	0.00238468	0.00471318
AMER3	4.82785	1.16415	0.00372147	0.00162789	0	0
AMFR	-0.256214	79.4498	29.9856	29.8482	34.381	34.0811
AMH	0.553602	0.931745	0.677563	0.716068	0.563233	0.347055
AMIGO1	0.374188	0.0582852	0.00831382	0.0450046	0.0198386	0.0196049
AMIGO2	0.685357	0.0799385	0.00594808	0.00585423	0	0.0070131
AMIGO3	0.137914	1.12406	6.80888	6.57565	5.95163	5.7023
AMMECR1	-0.0475197	1.85903	14.2057	14.3098	14.0437	14.1892
AMMECR1L	-0.0847368	1.19704	5.39541	5.32983	5.36836	5.52758
AMN	0.287921	3.26333	9.00125	9.19267	7.2204	7.05702
AMN1	0.107723	0.375844	0.857915	0.855675	0.775961	0.74765
AMOT	4.00858	4.473	0.167288	0.168408	0.0164049	0.00360259
AMOTL1	0.338899	0.0957343	0.00921364	0.00793473	0.00824464	0.00475272
AMPD1	2.37855	0.50209	0.0107606	0.0169452	0.0025677	0.00253745
AMPD2	0.197432	7.83068	3.06696	3.16345	2.62214	2.58356
AMPD3	0.0857646	0.728179	1.51917	1.61654	1.39188	1.43883
AMPH	2.20629	0.801424	0.0214941	0.0135996	0.00366353	0.00362037
AMT	0.411649	2.42998	0.517856	0.508715	0.3613	0.377978
AMTN	-0.101068	0.0112401	0.0103098	0.0253679	0.0184511	0.0182337
AMY2A	1.62426	0.603929	0.0737933	0.0907862	0.0440216	0.00725051
AMY2B	0.626994	3.23462	1.55102	2.04747	1.12569	1.10701
AMZ1	0.367638	2.23873	0.49497	0.530932	0.362585	0.399097
AMZ2	-0.119703	6.258	3.23836	3.18726	3.33511	3.35311
AMZ2P1	-0.178374	2.36098	6.4919	6.58639	7.24317	6.93604
ANAPC1	0.00576234	0.0863375	44.586	44.1073	42.2837	42.346
ANAPC10	-0.139653	0.982542	1.04411	1.0011	1.06176	1.09654
ANAPC11	-0.0700295	1.05655	5.06877	4.88937	4.98232	5.03174
ANAPC13	-0.139193	2.73784	9.20445	9.3667	9.75955	9.83417
ANAPC15	-0.0812482	0.28011	0.945448	0.952319	0.993758	0.92985
ANAPC16	-0.0717617	1.76964	5.82974	5.82268	5.99895	5.73429
ANAPC1P1	0.268895	0.551948	1.46119	1.39787	1.04601	1.22665
ANAPC2	0.04732	0.48312	22.3717	22.4548	20.5259	21.0317
ANAPC4	-0.00873289	0.0553933	15.1322	15.0271	14.8986	14.1717
ANAPC5	-0.0156321	0.31627	38.5997	38.5277	37.4456	37.249
ANAPC7	-0.0285472	0.523719	33.6532	34.2898	32.8898	33.5011
ANG	0.798397	0.127751	0.0261822	0.0412305	0	0.0370442
ANGEL1	0.0949574	1.54338	13.8723	13.412	12.1856	12.287
ANGEL2	0.0284832	0.231495	2.39993	2.36581	2.25803	2.21842
ANGPT1	1.92791	0.575004	0.00753801	0.00824341	0.00199859	0.00197504
ANGPT2	-0.048048	0.0854166	0.324018	0.344133	0.333265	0.328565
ANGPT4	0.557593	0.085669	0.007777	0.00437388	0.00397662	0.00392978
ANGPTL1	-0.138602	0.302495	1.06113	1.13285	1.12076	1.19302
ANGPTL2	-0.218998	0.213422	0.250327	0.257705	0.284935	0.281579
ANGPTL3	0.0648406	0.0112401	0.0174311	0.0411745	0.0207971	0.0328834
ANGPTL4	0.0909415	0.0630215	0.212725	0.200364	0.166473	0.204966
ANGPTL5	0.313504	0.0900778	0.069612	0.0642315	0.0467182	0.0564273
ANGPTL6	-0.200912	0.916626	1.82952	1.94002	1.99696	2.15376
ANGPTL7	0.0743612	0.0633315	0.799513	0.587964	0.568056	0.693761
ANGPTL8	0.589548	0.333619	0.331078	0.39568	0.225721	0.237003
ANK1	0.220522	1.69866	0.245834	0.265046	0.215172	0.20494
ANK2	0.235493	4.78275	1.0578	1.08698	0.902118	0.843367
ANK3	0.840885	2.8222	0.0333291	0.0310768	0.0176734	0.0167758
ANKAR	-0.197446	0.380209	0.637813	0.540371	0.64948	0.644584
ANKDD1A	0.309784	0.542699	0.606459	0.583844	0.494242	0.425902
ANKDD1B	0.679514	0.351149	0.101097	0.107463	0.072372	0.0524476
ANKEF1	0.0908301	0.463582	1.46633	1.4274	1.32621	1.27695
ANKFN1	-0.967231	0.0996035	0	0.037739	0.030499	0.0401863
ANKFY1	0.0444568	0.492674	2.55348	2.44703	2.3288	2.31626
ANKH	0.104093	2.51006	8.81188	8.74804	7.81939	7.83212
ANKHD1	-0.0233275	0.0419248	0.450441	0.505873	0.472562	0.458671
ANKHD1-EIF4EBP3	-0.213473	0.0743489	0.0345694	0.0182271	0.0353529	0.0232909
ANKIB1	-0.00489348	0.0414759	21.7833	21.5779	20.7611	20.9199
ANKLE1	0.0560106	1.75322	11.6928	11.4184	10.7151	10.5826
ANKLE2	-0.111296	8.52118	42.5418	42.5532	43.8684	44.1911
ANKMY1	0.193091	2.45646	1.33513	1.30751	1.11131	1.10321
ANKMY2	-0.169625	2.67229	11.4974	12.2924	12.7121	12.9237
ANKRA2	0.126822	0.553838	4.77303	4.82231	4.17875	4.24008
ANKRD1	1.85388	0.730293	0.0783467	0.0616884	0.00623173	0.0307916
ANKRD10	-0.0468221	0.791277	13.0314	13.1041	13.0769	12.7883
ANKRD11	0.247937	36.3316	6.33936	6.30268	5.14134	5.05777
ANKRD12	-0.182383	12.515	3.04517	3.07648	3.33484	3.32022
ANKRD13A	-0.208959	74.7467	137.867	138.195	151.31	154.374
ANKRD13B	0.313668	7.86545	9.00567	8.90197	6.90594	6.8974
ANKRD13C	-0.211728	11.6425	13.9175	13.655	15.0695	15.5191
ANKRD13D	0.0224821	0.136295	11.279	10.9905	10.5088	10.4953
ANKRD16	-0.0339916	0.115186	2.88396	2.8161	2.77355	2.81713
ANKRD17	-0.00990759	0.146141	6.43776	6.3796	6.20394	6.15992
ANKRD18A	1.81826	0.613394	0.0149794	0.0122859	0.00446802	0.00294359
ANKRD18B	4.32328	1.36016	0.0329572	0.0351403	0.00327679	0
ANKRD18CP	0.311451	0.0889424	0.0368241	0.0440095	0.0345205	0.0279113
ANKRD18DP	-0.319944	0.779273	0.750634	0.742292	0.976232	0.809536
ANKRD19P	-0.00500432	0.00554368	1.1662	1.20936	1.10352	1.18008
ANKRD20A11P	0.0322095	0.0194993	0.786577	0.820804	0.72364	0.782158
ANKRD20A12P	0.832	0.201024	0.0413133	0.0755142	0.0140832	0.0487106
ANKRD20A4-ANKRD20A20P	-0.753198	0.470878	0.0517641	0.0347369	0.0814111	0.0582584
ANKRD20A5P	0.491129	0.185218	0.0695165	0.0465254	0.026541	0.0524567
ANKRD20A8P	0.720596	0.237469	0.0394097	0.0526407	0.0436614	0.00995702
ANKRD20A9P	0.600724	0.210291	0.0653919	0.039842	0.0297217	0.0367145
ANKRD22	1.03542	0.23123	0.0129035	0.0330197	0.0184742	0.00304277
ANKRD23	0.151736	0.603896	3.26291	3.44699	3.01256	2.77483
ANKRD24	0.203048	0.0998775	0.0999683	0.100914	0.0795152	0.0876453
ANKRD26	-0.139358	4.74387	5.33527	5.37168	5.57746	5.71992
ANKRD26P1	0.538358	0.194321	0.0201705	0.0463219	0.026071	0.0178365
ANKRD26P3	0.942617	0.270378	0.0387821	0.0272645	0.0264407	0.00653231
ANKRD27	0.0593864	1.38595	26.9322	26.4547	24.5599	24.5222
ANKRD28	0.0241056	0.387065	2.21228	2.20691	2.04954	2.11377
ANKRD29	2.13553	0.367763	0.0077706	0.0091776	0.00370846	0
ANKRD30A	-0.73718	0.109706	0.00704743	0.00693624	0.0168167	0.00553953
ANKRD30B	0.0451494	0.00875439	0.00672129	0.0418966	0.0240577	0.0211327
ANKRD30BL	0.0690942	0.0549263	0.369352	0.41178	0.37438	0.339139
ANKRD30BP2	1.10585	1.42971	0.177787	0.151255	0.0575237	0.0888219
ANKRD31	0.185054	0.0818445	0.0563455	0.063859	0.0590775	0.0422763
ANKRD33B	-0.00445725	0.00977763	1.10676	1.10663	1.08684	1.04031
ANKRD34A	0.0179833	0.0161417	0.49781	0.543151	0.46497	0.519864
ANKRD34B	2.59244	0.59944	0.023504	0.0154221	0	0.00615832
ANKRD34C	1.09419	0.246154	0.0151434	0.0149044	0.00903382	0.0044637
ANKRD35	1.90551	0.422381	0.0127694	0.00942595	0.00190441	0.00376395
ANKRD36	0.124642	4.22287	13.9547	14.0608	12.186	12.4314
ANKRD36B	0.148048	2.88939	7.78133	7.47156	6.59666	6.59023
ANKRD36BP1	-0.0302056	0.1188	13.9935	15.2478	14.7752	13.8354
ANKRD36BP2	0.10083	9.26306	157.025	157.761	141.297	139.922
ANKRD36C	0.0359912	0.506232	12.9954	13.1763	12.2668	12.189
ANKRD37	0.358749	1.57493	4.83628	4.8892	3.40729	3.85739
ANKRD39	0.0291411	0.0798933	14.5685	14.2935	13.6836	13.4141
ANKRD40	-0.0292398	0.327392	22.93	23.5531	22.935	22.5108
ANKRD42	-0.188486	1.42914	0.541769	0.555402	0.577017	0.620705
ANKRD44	-0.154054	9.9841	15.0408	15.0919	16.0235	16.0971
ANKRD44-IT1	-0.035098	0.0385825	2.31723	2.18564	2.14265	2.27678
ANKRD45	0.161164	0.0127256	0.0308095	0.0227425	0.0459488	0
ANKRD46	-0.103864	1.4805	4.81267	4.77544	5.1426	4.72962
ANKRD49	-0.105545	1.17379	18.5842	17.8555	18.265	19.2905
ANKRD50	-0.374037	10.2325	1.31542	1.2798	1.64753	1.57469
ANKRD52	0.00635236	0.0331087	6.06074	6.20981	5.79483	5.90889
ANKRD53	0.851025	0.778784	0.107641	0.115797	0.0448001	0.0737872
ANKRD54	-0.14085	2.08544	2.74334	2.68951	2.8597	2.87866
ANKRD6	0.858441	3.10417	0.0660586	0.0691986	0.0350288	0.0364381
ANKRD61	0.382068	1.29541	2.62368	2.40444	2.06101	1.6362
ANKRD62	0.00488815	0.000349172	0.0108746	0.010703	0.00518981	0.015386
ANKRD62P1-PARP4P3	0.570532	0.0981927	0.02685	0.0594593	0.0240262	0.0316575
ANKRD63	5.0279	1.3817	0.0146133	0.0215741	0	0
ANKRD7	0.00922396	0.0121441	3.44395	3.33723	3.03866	3.4152
ANKRD9	-1.86958	1.17293	0.00143064	0.00704034	0.0179225	0.0118076
ANKS1A	0.048995	0.398392	7.65822	7.88704	7.01974	7.37503
ANKS1B	-0.44676	1.86012	0.0155694	0.0143698	0.0198771	0.0192143
ANKS3	0.148365	1.06491	1.09525	1.16848	0.99336	0.963586
ANKS4B	0.767407	0.172294	0.0282739	0.0313062	0.0168669	0.0166682
ANKS6	-0.049829	0.347269	5.04859	5.00984	4.91216	5.06212
ANKUB1	0.944139	0.246154	0.0262847	0.0106524	0.0166026	0.001823
ANKZF1	0.0734172	1.60168	13.3051	13.2922	11.8982	12.317
ANLN	-0.237302	25.9962	8.94094	8.88669	10.0003	10.1318
ANO1	1.41819	0.228031	0.00737314	0.00483787	0.00293232	0.00144889
ANO10	-0.468917	0.279763	0.00691339	0.0113405	0.0133546	0.0108683
ANO2	2.1418	0.744546	0.0181037	0.0123356	0.00332303	0.00328388
ANO3	1.41675	0.406632	0.00469963	0.00693823	0.00140179	0.00277056
ANO4	0.265471	0.0460563	0.00510618	0.00753842	0.00304611	0.00702385
ANO5	0.0306225	0.0050645	0.00541197	0.00532658	0.00276731	0.00729256
ANO6	-0.0668306	1.40983	4.07393	4.09374	4.09642	4.09937
ANO7	0.614861	0.45146	0.0966694	0.0749008	0.0490796	0.0582017
ANO8	-0.140419	0.413066	1.5914	1.37325	1.57288	1.55728
ANO9	-0.0436203	0.132983	2.21236	2.1757	2.20776	2.12527
ANOS1	1.00771	0.18902	0.0130308	0.0112221	0	0.011523
ANP32A	-0.0576613	3.94304	132.873	133.768	132.777	133.087
ANP32A-IT1	0.228232	0.749967	1.48006	1.7462	1.3552	1.2839
ANP32AP1	-0.130249	0.166802	2.64593	2.52194	2.8578	2.56143
ANP32B	0.127968	4.35825	63.5196	60.5147	54.1413	54.5941
ANP32C	0.285291	0.18902	0.728936	0.832224	0.574001	0.653184
ANP32D	0.0655725	0.0113208	0.181883	0.255734	0.217006	0.183814
ANP32E	-0.103241	12.1575	18.5884	18.6306	19.1843	19.1176
ANPEP	2.92978	0.836523	0.0367662	0.0167013	0.00674861	0
ANTXR1	3.4813	1.37969	0.00835358	0.0205544	0.00249168	0
ANTXR2	1.30853	0.577609	0.00813717	0.00560615	0.00388341	0.00143912
ANTXRL	2.92819	0.842858	0.0316772	0.053447	0	0.0106712
ANTXRLP1	-0.214027	0.799911	2.27118	2.42869	2.66974	2.55355
ANXA1	-0.333373	0.0374489	0	0.0464283	0.0482417	0.00794557
ANXA11	0.0718693	3.75144	14.8627	15.1677	13.8437	13.5293
ANXA2	0.36174	24.7174	10.2314	10.1628	7.6543	7.55093
ANXA2P1	0.482067	0.227455	0.229435	0.180652	0.145995	0.135258
ANXA2P2	0.723937	2.57636	1.58381	1.58969	0.823217	1.0169
ANXA2P3	1.07334	0.553494	0.152163	0.164739	0.0544641	0.0897042
ANXA2R	-0.0424019	0.0675769	3.7646	3.56946	3.46548	3.76904
ANXA3	0.25349	0.0290627	0	0.0566438	0.030518	0.0150792
ANXA4	-0.485488	0.242228	0.0196955	0.0224455	0.0247356	0.0317775
ANXA5	0.699305	14.0545	8.89151	8.68753	5.60537	4.76872
ANXA6	0.262542	1.43853	1.24539	1.35961	1.05382	1.02682
ANXA7	0.0246801	0.329021	13.2653	13.2714	12.4119	12.579
ANXA9	0.12211	0.10786	0.635084	0.686454	0.568292	0.595026
AOAH	1.29449	0.837273	0.0352743	0.0333291	0.0168344	0.00998166
AOC2	-0.0299906	0.0414292	0.839539	1.04677	0.843625	1.00134
AOC3	0.149129	0.214972	0.166305	0.155887	0.134857	0.143454
AOC4P	1.5859	0.353721	0.0247669	0.0487523	0.00590992	0.0175209
AOX1	-0.26011	0.239684	0.163444	0.146428	0.190005	0.165532
AOX3P-AOX2P	1.17752	2.31802	0.091388	0.0772479	0.0372004	0.0342269
AP1AR	0.128384	4.75278	5.57358	5.55903	4.7838	4.97278
AP1B1	0.0888263	12.0734	36.2357	36.1057	32.5663	32.5992
AP1G1	-0.19089	19.7667	11.8744	11.6834	12.7445	13.0158
AP1G2	0.196175	5.38449	6.0216	6.2508	5.14792	5.11491
AP1M1	0.037551	0.322108	12.557	12.4166	11.8355	11.4757
AP1M2	0.952932	0.447057	0.0765926	0.0434909	0.0316326	0.0277867
AP1S1	-0.170171	4.25062	35.2626	36.3325	39.4467	37.7363
AP1S2	-0.0496002	0.408834	10.3121	10.1276	10.413	9.85465
AP1S3	0.402971	5.28721	1.01937	1.05497	0.736508	0.766406
AP2A1	0.196697	12.8372	16.4408	16.0949	13.7411	13.4562
AP2A2	0.0692814	1.08487	3.7302	3.69522	3.39139	3.38868
AP2B1	0.0512105	1.35198	12.943	12.8933	11.9735	11.9149
AP2M1	-0.0947644	11.228	62.6536	62.4538	64.5951	63.4
AP2S1	-0.0299122	0.252883	14.2524	14.507	14.121	14.0091
AP3B1	-0.046026	0.810087	14.5262	14.8869	14.3249	14.7663
AP3B2	0.92248	0.984143	0.0284954	0.0324085	0.0143547	0.0164255
AP3D1	0.172638	15.0605	18.3532	18.0524	15.7325	15.2122
AP3M1	-0.0166021	0.194321	4.60252	4.66877	4.54364	4.44165
AP3M2	-0.00913443	0.0361805	4.72609	5.02292	4.83271	4.56749
AP3S1	-0.214944	14.5539	9.26569	9.33373	10.3194	10.3619
AP3S2	-0.0486522	0.031312	0.047022	0.0428938	0.043103	0.0459758
AP4B1	-0.0508964	0.32017	2.47903	2.46393	2.4939	2.41178
AP4B1-AS1	-0.00401438	0.0055495	1.21712	1.2397	1.21913	1.14136
AP4E1	-0.201493	12.4113	6.27635	6.27311	6.88058	6.94386
AP4M1	0.0210683	0.0696376	10.424	10.7338	9.87294	10.1028
AP4S1	-0.314421	12.3859	1.91046	1.8963	2.25133	2.28356
AP5B1	-0.120053	3.97941	13.1418	12.8532	13.3449	13.7181
AP5M1	-0.10017	3.53052	18.6835	18.5477	18.9339	19.2974
AP5S1	-0.0305524	0.100852	3.09746	2.97314	2.92251	3.0172
AP5Z1	0.040914	0.335512	9.39041	9.5819	8.74668	8.92077
APAF1	-0.0856879	1.48966	2.13311	2.27431	2.22504	2.25589
APBA1	0.419355	0.0726408	0.0171812	0.00614913	0.0130448	0.00368318
APBA2	2.25479	0.397395	0.0028466	0.0140084	0.0033963	0
APBA3	0.205826	3.42821	12.7874	12.8915	10.8024	10.5286
APBB1	0.161729	0.352369	0.199778	0.190498	0.173969	0.160296
APBB1IP	0.234577	22.8082	52.6323	51.694	42.6999	42.2477
APBB2	-0.00104436	0.00800469	1.65595	1.66526	1.58187	1.60217
APBB3	-0.229773	1.23962	0.802544	0.889357	0.960391	0.940566
APC	-0.0962158	3.42173	3.45257	3.40341	3.47264	3.54816
APC2	0.188675	1.90156	0.915427	0.905511	0.753138	0.777411
APCDD1	1.42083	0.228521	0.0240831	0.0158021	0.00478895	0.00946507
APCDD1L	0.969305	0.736198	0.0395152	0.0466701	0.0204299	0.0217422
APEH	0.0425207	1.14412	68.9142	70.4482	64.5611	65.0744
APEX1	-0.0157486	0.270748	38.6964	38.6871	37.6123	37.3368
APEX2	-0.0201277	0.103026	9.67811	10.0257	9.61741	9.5253
APH1A	-0.00724447	0.0714283	10.7375	10.8546	10.3689	10.4209
APH1B	-0.0581459	0.824069	8.69753	8.67048	8.52218	8.80013
API5	-0.0696723	4.10579	13.7245	13.709	13.6677	13.9137
APIP	-0.0290976	0.222803	46.8642	46.3793	46.4166	44.7359
APLF	0.15893	1.21346	4.16258	4.15216	3.62991	3.50519
APLNR	-0.0523585	0.0055495	0.00705874	0.00347369	0.00421092	0.00624197
APLP1	-0.097848	0.0287557	0.0330345	0.0386096	0.0369504	0.0365151
APLP2	-0.245045	125.674	13.6831	13.6923	15.5731	15.5083
APMAP	0.117534	2.88429	31.0501	32.1585	28.1388	27.6815
APOA1	-0.548763	0.105421	0.00240586	0.0260469	0.0172227	0.0226931
APOA1-AS	0.23955	0.123517	0.786679	0.792273	0.807625	0.474553
APOB	1.83265	1.12073	0.0152946	0.0136197	0.00434479	0.00343488
APOBEC2	-0.133029	0.159356	1.0383	1.02192	1.07363	1.09066
APOBEC3A	0.182319	0.0629202	0.0726871	0.110887	0.0563702	0.0985571
APOBEC3B	-0.0256501	0.0802154	5.52883	5.77324	5.42734	5.59448
APOBEC3B-AS1	2.58091	0.589729	0.0736256	0.144928	0.0351373	0
APOBEC3C	-0.080486	0.619452	24.6229	24.3167	25.078	24.4979
APOBEC3D	-0.310273	2.42297	3.04284	2.88151	3.46363	3.57312
APOBEC3F	-0.0791519	0.15048	0.813963	0.887678	0.879611	0.842775
APOBEC3G	-0.112508	0.833512	1.94976	1.90992	1.97281	2.0245
APOBEC4	1.29563	0.883382	0.110916	0.080055	0.030878	0.0435919
APOBR	-0.188623	0.244751	0.509377	0.394672	0.536623	0.450437
APOC1	0.544432	0.254813	0.130536	0.144536	0.103829	0.0769545
APOE	-0.0177748	0.00800469	0.0587536	0.115653	0.086122	0.0831282
APOF	-0.30967	0.260171	0.328527	0.419149	0.515364	0.373004
APOL1	0.342076	0.215281	0.0390413	0.0445384	0.0370526	0.0261544
APOL2	-0.0440654	0.154887	2.91976	2.97045	2.88071	2.93718
APOL3	-0.163435	2.46198	1.66657	1.67376	1.7764	1.80748
APOL4	-0.131395	0.0239148	0.00619397	0.0182887	0.0129326	0.0127803
APOL5	-0.197672	0.386991	2.09999	1.9681	1.94968	2.51825
APOL6	-0.254956	59.4284	23.6192	23.9143	27.2911	27.0508
APOLD1	0.186959	0.752458	0.735446	0.752925	0.629373	0.623249
APOM	0.225133	0.425048	0.184115	0.162031	0.133886	0.149739
APOO	0.0625247	0.228696	6.95883	6.63576	6.26957	6.20152
APOOL	0.12909	1.24027	3.8158	3.86509	3.28793	3.44032
APOOP5	0.417112	0.0587856	0.0390987	0.0577227	0.0233245	0.0460994
APOPT1	0.0466508	0.250714	3.47202	3.3307	3.16188	3.14767
APP	1.67662	0.376176	0.00238234	0.00234475	0.00142119	0
APPBP2	-0.123014	2.54029	4.61949	4.50819	4.61624	4.90562
APPL1	0.0535694	1.08365	17.9907	18.0214	16.6847	16.5583
APPL2	-0.0861894	0.536541	2.35503	2.51807	2.38638	2.56936
APRT	-0.0923303	3.46229	86.3384	84.0416	86.4755	87.5313
APTR	-0.0984071	0.612239	2.16905	2.18183	2.22656	2.2359
APTX	0.0660028	0.784592	2.23347	2.21387	2.04687	2.02326
AQP1	0.766357	0.16608	0.0164918	0.0144281	0.0131177	0.00432105
AQP11	0.368304	0.712391	0.811526	1.01954	0.740416	0.619126
AQP2	1.14083	0.341133	0.0294996	0.0241952	0.0117321	0.0115939
AQP3	-0.0408459	0.328802	15.0606	14.6131	14.8806	14.3642
AQP4	0.679042	0.100814	0.00386788	0.00190343	0.00346109	0
AQP6	-0.244161	0.053647	0.0348569	0.0381188	0.0600715	0.0228323
AQP7P1	-0.267643	0.204999	0.171272	0.190834	0.192779	0.2248
AQP7P3	0.139933	0.0312707	0.215043	0.21165	0.186596	0.184398
AQP9	1.99883	0.315833	0.00604014	0.00594484	0.00288261	0
AQR	0.0817806	2.75709	27.0368	27.9938	25.0659	24.7515
AR	2.9265	0.852655	0.00337147	0.00298644	0.000804503	0
ARAF	0.0254371	0.215794	11.8171	11.5384	10.9139	11.069
ARAP1	-0.0205435	0.182626	7.37992	6.98758	7.00875	6.9525
ARAP1-AS2	-0.153533	0.245936	1.30687	1.26407	1.41137	1.32833
ARAP2	-0.177541	5.49033	2.25073	2.29587	2.48159	2.44475
ARAP3	1.89928	0.791331	0.0176651	0.0367046	0.00702544	0.00694268
ARCN1	-0.0960078	5.7575	24.6815	24.1995	25.2352	24.8161
AREG	1.09875	0.12761	0.028285	0.00397696	0.014463	0
AREL1	-0.0305695	0.438447	22.0592	22.294	21.5608	21.84
ARF1	-0.0297708	1.16817	46.4376	46.2775	45.1669	45.5062
ARF3	0.0129191	0.148034	44.1077	44.204	41.6418	42.2065
ARF4	-0.0610714	1.33771	58.3251	58.1039	57.9783	58.384
ARF4-AS1	0.0549061	0.0456789	1.47969	1.52865	1.21452	1.55904
ARF5	-0.0624761	1.48442	97.9732	99.3652	98.8615	98.5629
ARF6	-0.125655	10.9781	51.1216	52.2162	53.8055	54.2044
ARFGAP1	0.00659271	0.0510226	5.00836	4.90135	4.7177	4.73241
ARFGAP2	-0.0521668	1.34476	24.4078	24.4759	23.995	24.5594
ARFGAP3	-0.0370234	0.271972	8.66879	8.45308	8.3935	8.43536
ARFGEF1	-0.13042	7.69759	19.5271	20.1228	20.5986	20.9807
ARFGEF2	0.0559196	2.60072	28.9368	29.2487	26.5546	27.0679
ARFGEF3	0.389222	0.11353	0.0138246	0.00748359	0.00824714	0.00733499
ARFIP1	-0.0263486	0.185218	3.12095	3.11285	3.11021	2.97232
ARFIP2	-0.0864732	1.53772	4.1364	4.15821	4.2767	4.16092
ARFRP1	0.048665	0.630882	2.50874	2.53484	2.28471	2.38662
ARG1	-0.435886	0.343828	0.146024	0.14372	0.224	0.151674
ARG2	-0.0451583	0.16599	9.20689	8.83111	9.28336	8.54809
ARGFXP2	0.0615329	0.0361805	0.537486	0.663356	0.498771	0.603546
ARGLU1	-0.047292	0.938178	66.9384	66.4778	65.6847	66.3863
ARHGAP1	0.181619	4.36183	12.8046	13.1616	10.922	11.0119
ARHGAP10	1.19066	0.284754	0.0338391	0.0333052	0.0282616	0
ARHGAP11A	-0.211029	33.0588	10.9669	10.8057	12.124	12.0198
ARHGAP11B	-0.0792636	0.441437	20.0492	19.0928	19.6289	19.9848
ARHGAP12	-0.175143	3.79874	1.26532	1.23071	1.36225	1.33763
ARHGAP15	-0.173097	6.6998	37.3835	36.7127	39.8798	40.1521
ARHGAP17	-0.512652	21.6465	3.20304	3.25134	4.4715	4.35065
ARHGAP18	-0.395613	5.79155	2.94292	3.06466	3.82052	3.7512
ARHGAP19	-0.250393	19.876	6.09597	5.86965	6.77209	6.86305
ARHGAP20	1.31975	0.510543	0.00541623	0.00399808	0.00161553	0.00199563
ARHGAP21	1.66743	0.201459	0.00718626	0.0268769	0.0102888	0
ARHGAP22	-0.807728	1.27855	0.0150152	0.0100281	0.0207939	0.0211812
ARHGAP23	0.225872	0.463531	0.467629	0.585618	0.426776	0.43615
ARHGAP24	-0.268685	6.09233	1.132	1.13494	1.32195	1.29448
ARHGAP25	-0.145955	2.81434	3.55177	3.60125	3.69772	3.88416
ARHGAP26	0.0787587	0.631582	0.928124	0.876908	0.813468	0.8238
ARHGAP26-AS1	1.30945	0.607812	0.190259	0.166451	0.0630553	0.0747751
ARHGAP26-IT1	1.13916	0.335512	0.239302	0.340205	0.0951711	0.15675
ARHGAP27	-0.0820167	0.87411	2.27094	2.15194	2.23788	2.24692
ARHGAP27P1	0.0374469	0.0561122	1.47284	1.56571	1.42884	1.40779
ARHGAP27P1-BPTFP1-KPNA2P3	0.0033551	0.00677469	3.64929	3.76545	3.36113	3.72505
ARHGAP28	1.06213	0.202511	0.0148907	0.00915985	0.00444155	0.00658384
ARHGAP29	-0.0643195	0.0143358	0.00367461	0.00203436	0.0021921	0.0035202
ARHGAP30	-0.129319	11.6282	11.5474	11.6179	12.13	12.144
ARHGAP31	0.354639	0.162496	0.041985	0.0325571	0.0288412	0.0270013
ARHGAP32	2.74292	4.09711	0.0215585	0.0263935	0.00439149	0.00247986
ARHGAP33	0.348001	7.51174	2.91357	2.92749	2.12686	2.26924
ARHGAP35	0.00904728	0.148143	36.2675	36.9008	34.7687	34.8905
ARHGAP39	0.305744	0.756795	0.189746	0.196581	0.139577	0.1598
ARHGAP4	0.127011	9.02565	27.3441	27.0816	23.6475	24.0974
ARHGAP42	1.34215	0.360321	0.0151954	0.0256383	0.00517993	0.0102378
ARHGAP44	0.14296	0.152386	0.0702355	0.0634678	0.0666467	0.0493962
ARHGAP45	-0.116331	16.3759	14.1107	13.8999	14.4623	14.6249
ARHGAP5	0.108654	1.66969	2.33174	2.31496	2.0629	2.06572
ARHGAP5-AS1	-0.0409344	0.0112221	0.112256	0.157836	0.133933	0.132356
ARHGAP6	-0.0540248	0.0103628	0.00611169	0.00231356	0.00560916	0.00277154
ARHGAP9	-0.17501	5.50884	3.33634	3.37242	3.64525	3.61096
ARHGDIA	0.205173	32.4653	18.956	18.5736	15.7661	15.4221
ARHGDIB	-0.222001	75.6825	55.6504	54.9568	61.8672	61.722
ARHGEF1	-0.0741373	5.09564	26.8977	26.8559	27.1751	27.0376
ARHGEF10	0.633518	0.340531	0.0215334	0.0139272	0.0110107	0.010881
ARHGEF10L	-0.410766	0.090934	0.0023664	0.00299451	0.0052434	0.00159435
ARHGEF11	1.61412	10.5744	0.162527	0.175587	0.0577228	0.0481299
ARHGEF12	0.151925	7.6808	3.65177	3.65621	3.12039	3.18083
ARHGEF16	0.998445	0.152621	0.0106578	0.0244757	0.00847722	0.00837736
ARHGEF17	1.41946	0.413001	0.0158061	0.0103711	0.00471458	0.00465905
ARHGEF18	-0.00634236	0.0824481	26.0317	25.4998	24.6724	24.9114
ARHGEF19	-0.0706442	0.205023	2.95092	2.72208	2.80262	2.90426
ARHGEF2	-0.0343195	0.820943	7.52149	7.46877	7.34878	7.35771
ARHGEF25	1.05286	1.79911	0.0765379	0.0742983	0.0375279	0.032141
ARHGEF26	0.089771	0.103026	0.139661	0.128988	0.126355	0.115501
ARHGEF26-AS1	1.67304	0.293833	0.0158264	0.0311534	0.0141619	0
ARHGEF28	0.262624	0.0566106	0.00462446	0.00739618	0.00551748	0.00408936
ARHGEF3	-0.26039	3.70625	1.09389	1.12163	1.30347	1.23911
ARHGEF33	0.657133	0.379534	0.0789862	0.0659612	0.051403	0.0366871
ARHGEF37	1.8755	0.913733	0.0401906	0.027065	0.00757132	0.00997617
ARHGEF38	0.683185	0.52097	0.0761359	0.0543643	0.0284983	0.0492845
ARHGEF39	-0.0684987	0.587383	9.84238	10.2226	9.86413	10.2927
ARHGEF4	0.559885	0.624865	0.0838559	0.12177	0.0623256	0.0713164
ARHGEF40	0.0292584	0.00894484	0.0141134	0.0104181	0.0126291	0.0104003
ARHGEF6	-0.0682993	3.87235	26.5889	26.5017	26.3068	27.0185
ARHGEF7	-0.170948	15.6204	2.60928	2.62319	2.79316	2.8501
ARHGEF9	0.075732	0.43062	1.06196	1.10248	1.00709	0.960628
ARHGEF9-IT1	0.196759	0.0514759	0.4126	0.355328	0.246138	0.395262
ARID1A	0.00391636	0.0317174	7.5143	7.3939	7.12027	7.12304
ARID1B	0.0178872	0.23879	6.20736	6.35908	5.87427	6.01614
ARID2	0.0158372	0.158018	8.29691	8.3653	7.99047	7.79864
ARID3A	-0.0430612	0.135914	6.10089	5.60071	5.47346	6.07431
ARID3B	-0.0938075	0.163421	0.422477	0.457274	0.472466	0.427164
ARID3C	0.678353	0.396384	0.224929	0.286974	0.188849	0.117868
ARID4A	-0.0857095	1.38447	3.27315	3.2251	3.2899	3.3164
ARID4B	-0.202939	14.9381	4.16262	4.13996	4.56561	4.58964
ARID5A	0.000231097	0.000251592	0.721469	0.710724	0.654881	0.716779
ARID5B	-0.0617969	1.13534	5.58312	5.6295	5.63406	5.57821
ARIH1	0.0230195	0.266889	23.4391	23.2834	21.7012	22.349
ARIH2	-0.0295671	0.73876	2.11336	2.08229	2.0594	2.04331
ARIH2OS	-0.206499	0.346502	1.34318	1.2018	1.46453	1.34878
ARL1	0.00242591	0.0112401	7.91837	8.24165	7.79038	7.66613
ARL10	0.238398	0.0948684	0.0505587	0.104498	0.0723863	0.0536502
ARL11	-0.198833	2.30286	4.94599	4.68786	5.383	5.21011
ARL13A	-0.0381018	0.0166352	0.111672	0.120134	0.130138	0.0979846
ARL13B	-0.186108	2.43579	0.823493	0.806633	0.872357	0.904235
ARL14EP	-0.170348	8.9036	38.5937	39.9549	42.1263	42.5577
ARL15	-0.0140803	0.0624695	14.4788	14.5598	13.7902	14.3009
ARL16	-0.0337264	0.157256	3.48367	3.47486	3.45779	3.36651
ARL17A	0.046723	0.112185	0.164506	0.176768	0.16002	0.156538
ARL2	0.144629	1.13522	10.2524	10.1285	9.19383	8.47077
ARL2BP	-0.114582	4.14928	43.4749	44.4484	45.5838	45.6132
ARL3	0.0196983	0.0819698	7.69491	7.79548	7.14523	7.49279
ARL4A	-0.285263	2.98135	0.849895	0.890347	1.02094	1.01087
ARL4C	2.9979	0.910551	0.0104702	0.0154575	0.00312302	0
ARL4D	-0.356786	0.147607	0.116703	0.140387	0.185653	0.129955
ARL5A	-0.191405	19.4856	16.9566	16.9604	18.3428	18.7591
ARL5B	-0.118369	3.60916	21.3461	21.9481	22.3513	22.6722
ARL5C	-0.164733	0.0224262	0.0878153	0.0216074	0.0916764	0.0258847
ARL6	-0.101547	1.09829	0.743779	0.732762	0.755531	0.762131
ARL6IP1	-0.302918	107.657	65.6381	65.8219	77.1509	78.212
ARL6IP4	-0.0182811	0.299443	16.0715	16.0914	15.5751	15.6302
ARL6IP5	-0.171949	2.8673	14.248	14.8979	15.3974	16.0589
ARL6IP6	-0.154655	5.44889	2.49141	2.46401	2.64379	2.64072
ARL8A	0.0297097	0.110827	7.17181	6.54624	6.40359	6.46955
ARL8B	-0.0921955	3.91996	45.0308	44.8529	45.4821	46.3076
ARL9	-0.10888	0.149732	3.17031	3.32669	2.89944	3.81068
ARMC1	-0.0208803	0.231495	18.9021	19.0178	18.4045	18.4531
ARMC10	0.129213	2.95113	3.82745	3.8414	3.34252	3.37488
ARMC12	-0.39466	0.435495	0.186769	0.201329	0.258206	0.230697
ARMC2	0.156997	0.118601	0.118467	0.122085	0.114738	0.0920236
ARMC4	2.00576	0.708035	0.0155395	0.00482978	0.00390321	0.000964308
ARMC4P1	0.419421	0.0751179	0.0181195	0.0203813	0.00617672	0.0213639
ARMC5	-0.15721	1.64868	1.27259	1.31159	1.38146	1.37934
ARMC6	-0.0255721	0.405963	31.3086	31.2852	30.7106	30.3288
ARMC7	0.0288616	0.0840192	2.30226	2.40715	2.24126	2.18142
ARMC8	-0.054645	0.947701	3.6733	3.78551	3.68682	3.73479
ARMC9	-0.131416	0.381177	0.510914	0.500188	0.53634	0.5247
ARMCX3	-0.00921266	0.042562	4.0452	4.03056	3.89442	3.89183
ARMCX4	-0.133502	0.0875279	0.0176589	0.0184666	0.0197522	0.0182182
ARMCX5-GPRASP2	-0.00653131	0.00296139	0.0101756	0.0117677	0.0106231	0.0104979
ARMCX6	-0.0921067	0.360475	1.66948	1.60001	1.75657	1.58248
ARMT1	-0.224527	11.5925	12.7391	12.5678	14.1455	14.1809
ARNT	-0.138475	4.2045	1.61688	1.61107	1.71099	1.69301
ARNT2	2.85133	0.777505	0.0188348	0.00926883	0.00374533	0
ARNTL	0.151294	0.110666	0.00856221	0.00969118	0.00906637	0.00668813
ARNTL2	-0.198111	3.86709	0.793521	0.822835	0.894363	0.882168
ARNTL2-AS1	-0.322024	0.141889	0.266417	0.349619	0.469228	0.269246
ARPC1A	0.00438288	0.0377426	45.6934	46.5263	44.7308	43.3547
ARPC1B	-0.121924	14.6967	186.867	186.25	196.344	192.639
ARPC2	-0.251989	98.1929	138.811	138.946	157.865	159.012
ARPC3	-0.213158	33.5745	112.544	114.94	125.429	127.206
ARPC4	-0.182042	13.3354	17.2072	17.0528	18.6585	18.5771
ARPC5	-0.19695	28.0682	47.2982	47.9595	52.6123	51.9983
ARPC5L	0.0679972	1.3346	34.47	34.7944	31.9412	31.3627
ARPIN	1.25863	0.367763	0.0032647	0.016066	0.00389514	0.00384926
ARPP19	-0.0364953	1.33214	10.7038	10.8984	10.554	10.6715
ARPP21	-0.197209	0.472168	0.136324	0.153214	0.161575	0.156489
ARR3	0.0652216	0.031563	0.381303	0.35965	0.350679	0.327816
ARRB1	2.18963	0.566696	0.00890149	0.0026957	0.000816956	0.00161466
ARRB2	0.16078	1.6635	1.7042	1.56585	1.42119	1.38112
ARRDC1	-0.0444175	0.396452	16.9526	16.3476	16.401	16.4971
ARRDC1-AS1	0.099144	1.01604	12.4971	12.6411	11.5056	10.9795
ARRDC2	-0.0386562	0.241715	5.53981	5.31246	5.21981	5.45815
ARRDC3	0.604431	34.4509	1.39869	1.44865	0.9029	0.891346
ARRDC3-AS1	0.0632546	0.107166	1.97958	1.78261	1.81794	1.63188
ARRDC4	-1.10437	0.222875	0.00505711	0.0124433	0.0301684	0.0059626
ARRDC5	4.82616	1.17379	0.0502185	0.0308914	0	0
ARSA	0.275183	5.34723	1.19622	1.21593	0.96786	0.941834
ARSB	0.219721	4.60486	4.34015	4.12924	3.4487	3.51839
ARSG	0.152321	0.806157	2.18518	2.33969	1.8809	2.01949
ARSJ	-0.896145	0.133041	0.0131695	0	0.0130938	0.0103517
ARSK	0.0789919	0.264634	3.17099	3.22388	2.90263	2.89745
ART1	-0.317491	0.0763735	0.0942318	0.0541013	0.0936905	0.0833281
ART3	0.171855	0.0375748	0.0132574	0.0391446	0.0289987	0.0156311
ART4	-1.2141	0.292819	0.0225075	0.0295365	0.0626589	0.053075
ARTN	0.775516	0.386648	0.0454536	0.039368	0.0282001	0.0192932
ARV1	-0.1686	1.99805	4.71805	5.09718	5.29663	5.27305
ARVCF	0.110823	0.182611	0.807579	0.832567	0.765334	0.690028
ARX	-0.995232	0.243066	0.0286188	0.00704181	0.0512179	0.0168715
AS3MT	0.491413	0.0513493	0.0125419	0.0164586	0	0.0197167
ASAH1	0.0645641	1.0131	9.00159	9.09552	8.34246	8.23659
ASAH2B	0.0106303	0.00418095	0.0155987	0.0220054	0.0186109	0.0171655
ASAP1	0.180933	1.47239	1.31477	1.31983	1.06044	1.16578
ASAP1-IT1	-0.11622	0.0362977	0.174252	0.154352	0.197506	0.143816
ASAP1-IT2	0.0783296	0.018784	0.0707822	0.0746415	0.0723863	0.0596113
ASAP2	0.185849	0.152791	0.0867151	0.0817533	0.0805902	0.0613449
ASAP3	-0.612293	19.3107	1.64952	1.59634	2.37963	2.37378
ASB1	0.0648326	0.905309	4.9511	4.91948	4.4488	4.59137
ASB12	0.402694	0.126876	0.127298	0.13312	0.0949252	0.093807
ASB13	-0.157264	8.32641	11.7548	11.6305	12.5011	12.4824
ASB14	0.158017	0.227957	0.411762	0.41092	0.345036	0.361294
ASB15	2.73717	1.04212	0.0234943	0.0213449	0.00646875	0
ASB16	0.391288	1.84489	2.09693	2.26739	1.49767	1.68984
ASB16-AS1	0.285528	2.44524	3.81925	3.48821	2.93487	2.80871
ASB18	-0.582549	0.0702462	0.00729195	0.0107653	0.00870007	0.0171952
ASB2	-0.395454	20.8805	6.68731	6.51407	8.35364	8.28155
ASB3	-0.135845	0.274546	0.645345	0.529303	0.630794	0.605501
ASB4	0.801639	0.224043	0.0172237	0.0282533	0.0182664	0.00676921
ASB6	-0.0215015	0.111853	3.72832	3.49638	3.61603	3.40947
ASB7	-0.0893484	1.19835	6.82544	7.15164	7.17919	7.06755
ASB8	-0.103114	1.25491	1.85615	1.85116	1.93048	1.88445
ASB9P1	0.171533	0.249315	1.36508	1.37465	1.06317	1.26674
ASCC1	-0.0822629	1.31273	5.46124	5.52477	5.69478	5.44837
ASCC2	0.0667837	0.975581	12.4291	12.432	11.5487	11.1922
ASCC3	0.0433283	1.396	15.1834	15.1638	13.9926	14.2196
ASF1A	-0.116243	4.62205	38.8649	39.2804	40.8684	40.2806
ASF1B	-0.0765366	3.84139	105.273	106.226	106.769	106.892
ASGR1	0.687926	0.0799385	0.0178681	0.0105517	0	0.0168539
ASH1L	-0.0225575	0.319415	12.4321	12.5671	12.2381	12.0898
ASH1L-AS1	-0.093011	0.258692	1.74388	1.70407	1.73784	1.78512
ASH2L	-0.0956269	2.05408	6.3179	6.52443	6.72443	6.42306
ASIC1	-0.0898381	0.0415235	0.0339826	0.0295116	0.0214649	0.0432098
ASIC2	0.263893	0.0351602	0.00503767	0.00991637	0.00400699	0.00791957
ASIC3	0.617841	2.3213	0.271871	0.26871	0.179294	0.158246
ASIC4	0.479141	0.222021	0.0412257	0.0546884	0.0384939	0.0274737
ASIC5	-2.31147	0.379302	0.0122038	0	0.0218407	0.0359723
ASIP	-0.0320782	0.0150969	0.97158	0.869318	1.09597	0.708154
ASL	-0.117201	1.50662	4.21818	4.22182	4.48197	4.28851
ASNA1	-0.0676236	0.791142	37.7555	37.4149	38.0758	37.3958
ASNS	0.311791	4.05582	1.1191	1.05586	0.860556	0.818156
ASNSD1	-0.162813	7.05649	35.1704	35.4392	36.9695	38.753
ASNSP1	2.58091	0.589729	0.0354155	0.0697135	0.0169018	0
ASPDH	0.836535	0.857924	0.245667	0.333134	0.117243	0.193103
ASPH	-0.473227	46.9039	1.22417	1.22162	1.64352	1.6093
ASPHD1	-0.367809	0.124713	0.104374	0.0958785	0.116227	0.131266
ASPHD2	0.0938992	0.331715	3.1699	3.45264	3.03451	2.91099
ASPM	-0.20878	71.6043	27.3469	27.237	30.0208	30.4125
ASPN	-0.0886133	0.111871	0.494648	0.467876	0.513523	0.467078
ASPRV1	0.301461	0.215794	0.273943	0.302161	0.180327	0.267305
ASPSCR1	0.129255	1.64067	4.96739	4.69121	4.13147	4.32777
AS-PTPRE	0.0690081	0.0446759	0.397495	0.37364	0.303736	0.40021
ASS1	1.50524	19.5604	1.4072	1.30649	0.499602	0.416469
ASTE1	-0.0168447	0.0518234	2.26601	2.29305	2.24843	2.1708
ASTL	0.578974	0.287063	0.25519	0.172675	0.14272	0.131636
ASTN1	0.90441	0.171739	0.00400211	0.00525196	0.000795824	0.00393225
ASTN2	2.11192	3.19196	0.0371344	0.025648	0.00777285	0.00614503
ASXL1	0.0211972	0.431234	29.3065	29.3034	27.6485	27.6817
ASXL2	-0.0481452	0.576938	5.38777	5.37657	5.25943	5.40251
ASXL3	2.19656	2.14712	0.0270351	0.0292694	0.00860153	0.00318758
ASZ1	0.880207	1.98316	0.191326	0.214409	0.106226	0.104974
ATAD1	0.0386256	0.59944	5.11662	5.16294	4.7429	4.84471
ATAD2	-0.0987837	10.5544	53.286	53.7097	55.0045	54.7653
ATAD2B	-0.1159	2.51172	2.55803	2.71905	2.74333	2.73543
ATAD3A	0.104165	6.10281	25.265	25.5568	22.3257	22.9696
ATAD3B	0.0720784	1.82283	21.5603	21.202	19.4754	19.4945
ATAD3C	0.296663	0.676106	0.632292	0.706342	0.518844	0.525314
ATAD5	-0.0527408	1.3945	20.2568	20.3211	20.1094	20.2121
ATAT1	0.041304	0.102883	0.089003	0.0910176	0.0862514	0.081361
ATE1	-0.0163707	0.0991683	1.86079	1.8688	1.78283	1.83084
ATE1-AS1	1.21899	0.510481	0.12978	0.212887	0.0645171	0.0765085
ATF1	-0.10626	1.8392	19.5736	20.3404	20.6377	20.5254
ATF2	-0.0826348	2.06867	1.79031	1.77558	1.78284	1.83455
ATF3	1.8978	42.5154	0.634298	0.63322	0.183045	0.142961
ATF4	0.00530293	0.103026	177.871	175.608	170.193	167.208
ATF5	0.830549	36.6331	3.66367	3.63755	2.02617	1.9074
ATF6	0.00911817	0.0566106	9.63234	10.0076	9.38973	9.30804
ATF6B	0.076521	1.55564	4.14336	4.1997	3.86341	3.717
ATF7	-0.234954	2.15809	0.674359	0.693098	0.766061	0.775711
ATF7IP	-0.0547959	1.17088	3.54776	3.62203	3.57253	3.56235
ATF7IP2	-0.531629	3.37659	0.144064	0.153839	0.197723	0.214822
ATG10	0.153281	0.70018	2.04176	2.01385	1.71695	1.77654
ATG101	-0.14439	3.04695	17.1374	16.496	17.9886	17.624
ATG12	-0.0906199	2.42918	3.82558	3.84897	3.91164	3.91738
ATG13	-0.0489955	0.562809	0.220525	0.212719	0.2121	0.217264
ATG14	0.00877709	0.019897	2.66506	2.56966	2.49409	2.49027
ATG16L1	-0.0819996	0.996394	2.57462	2.6092	2.6287	2.62801
ATG16L2	0.074474	0.809099	10.972	10.7019	9.64454	10.0732
ATG2A	0.0650474	0.768235	8.42858	8.38014	7.72393	7.66925
ATG2B	0.0900178	3.00099	8.54077	8.56015	7.65323	7.73853
ATG3	-0.0240178	0.18902	14.6636	14.8772	14.1822	14.5927
ATG4A	-0.142804	1.66121	1.21759	1.24291	1.28951	1.31295
ATG4B	-0.0490657	0.76846	15.479	15.4246	15.1916	15.438
ATG4C	-0.106887	0.861353	4.12216	4.04397	4.24648	4.17846
ATG4D	-0.0208953	0.107182	4.87196	4.90238	4.74013	4.76046
ATG5	-0.196465	9.01258	3.16078	3.12048	3.46959	3.42586
ATG7	0.21523	2.52722	0.409929	0.412942	0.328187	0.350822
ATG9A	0.0758479	0.710623	3.4281	3.35614	3.14147	3.02527
ATG9B	-0.650482	0.706103	0.0278519	0.0428319	0.056076	0.0502844
ATIC	0.0487048	0.745049	45.3565	44.3478	41.3606	41.7219
ATL1	-0.239649	1.08695	0.682272	0.719203	0.826196	0.759326
ATL2	-0.152419	12.5932	3.84931	3.95133	4.10951	4.19636
ATL3	-0.070343	0.644788	3.04521	3.03087	2.93623	3.17498
ATM	-0.0438447	3.74317	20.1593	20.2993	19.9074	20.0486
ATMIN	-0.0499748	0.772209	9.11218	8.96423	8.90525	9.02198
ATN1	0.375448	1.19934	0.349015	0.359811	0.276667	0.246904
ATOH7	0.93487	0.869305	0.243401	0.332723	0.161335	0.127548
ATOH8	-0.677825	0.108986	0.00875718	0.0034476	0.0083586	0.0103252
ATOX1	0.0552524	0.312483	56.1208	57.5888	53.7785	51.0741
ATP10B	0.537872	0.155003	0.0231403	0.0160766	0.0194886	0.00641968
ATP10D	0.008887	0.0305966	3.74402	3.85828	3.71094	3.52817
ATP11A	-0.330942	0.542922	0.0750524	0.0692515	0.0895455	0.0843427
ATP11B	-0.0201193	0.42275	37.4059	36.8226	35.9617	36.1473
ATP11C	-0.0281746	0.411103	10.7608	10.7433	10.4236	10.5834
ATP12A	-0.168993	0.02079	0.00970339	0.00409298	0.0148849	0
ATP13A1	0.192967	11.1419	24.9579	24.7931	20.9141	20.7812
ATP13A2	0.201407	5.83635	4.15249	4.18438	3.42343	3.52252
ATP13A3	-0.0293119	1.53365	66.3085	66.6399	65.0014	64.9804
ATP13A4	0.144413	0.0466792	0.0244076	0.038703	0.0339744	0.020784
ATP13A5	1.77824	0.804747	0.0367864	0.0473463	0.0135047	0.0100092
ATP1A1	0.0914668	6.62464	21.6323	21.9671	19.6041	19.5996
ATP1A1-AS1	0.297476	1.03954	0.728154	0.749827	0.560566	0.591482
ATP1A2	-0.0971078	0.0163077	0.0132212	0.0130126	0.0135208	0.0133615
ATP1A3	0.351698	29.9195	7.93749	7.86737	5.875	5.99021
ATP1A4	0.162344	0.0272712	0.0109046	0.0193186	0.0156124	0.0102857
ATP1B1	-0.216766	1.2644	3.80317	3.56821	4.1748	4.03186
ATP1B2	2.76341	0.721202	0.0120787	0.016983	0.00411747	0
ATP1B3	-0.0845218	4.64973	95.4172	95.3815	96.7253	97.0905
ATP1B4	0.679458	0.100852	0.00431326	0.00636782	0.00257309	0.00381417
ATP23	-0.0147083	0.0554407	5.71475	5.55553	5.23476	5.67162
ATP2A1	0.0424524	0.052054	0.327653	0.296605	0.312498	0.268277
ATP2A1-AS1	-0.0111088	0.0131805	1.53766	1.51796	1.49199	1.45803
ATP2A2	-0.00168685	0.0257688	34.5021	34.6166	33.2702	33.0251
ATP2A3	0.0430402	1.45958	7.24938	7.12672	6.709	6.65864
ATP2B1	0.0494246	2.24022	19.0313	19.0828	17.6546	17.6298
ATP2B1-AS1	0.185944	0.546545	1.84241	1.66841	1.40962	1.54645
ATP2B2	1.00896	0.318201	0.00725357	0.00413318	0.000455488	0.00495135
ATP2B3	-0.0283865	0.00591326	0.0103007	0.00701871	0.00850831	0.00840808
ATP2B4	1.3211	18.9181	0.354172	0.310744	0.125101	0.129809
ATP2C1	-0.0076815	0.0570399	2.19841	2.2388	2.12282	2.1508
ATP2C2	-0.110485	0.0240043	0.00736483	0.0155328	0.0100423	0.0136455
ATP2C2-AS1	0.547981	0.215492	0.0548296	0.0876923	0.0367974	0.0565661
ATP4A	1.92161	1.5321	0.0696415	0.0799665	0.0138483	0.023949
ATP4B	0.938666	0.571748	0.172205	0.203385	0.0657468	0.121823
ATP5A1	-0.223836	162.234	84.2873	84.3318	94.3281	94.3239
ATP5B	-0.135859	46.6173	388.811	386.821	410.243	406.209
ATP5C1	-0.17019	19.1871	52.2485	52.0835	56.14	56.3254
ATP5D	0.0804638	1.12972	35.1463	33.6397	31.0453	31.2749
ATP5E	-0.14974	0.258919	5.93206	6.85789	6.54396	7.04972
ATP5F1	-0.194662	31.9101	114.589	113.644	124.085	126.143
ATP5G1	-0.0302711	0.438557	99.3485	99.4562	97.8213	96.679
ATP5G2	-0.041576	0.786617	30.1893	30.2387	29.56	30.0224
ATP5G3	-0.0881065	5.1	23.8736	23.2773	24.1027	23.9125
ATP5H	-0.128481	5.95663	89.8071	91.0177	95.7057	93.6715
ATP5I	-0.198662	9.06291	102.02	106.05	115.029	113.747
ATP5J	-0.173284	6.14245	7.66289	7.55417	8.06556	8.37207
ATP5J2	-0.184342	9.66875	45.2232	45.1352	48.9883	49.3739
ATP5L	-0.269988	37.8498	50.0275	49.7058	57.7088	57.5002
ATP5L2	0.364701	0.354008	1.45334	1.05066	1.18157	0.682393
ATP5O	-0.138184	11.3429	205.011	204.748	215.114	216.896
ATP5S	-0.0497431	0.208618	2.8567	3.0874	2.91236	2.98218
ATP6AP1	0.0321362	0.214447	23.0706	22.2619	21.28	21.1914
ATP6AP1L	0.114668	0.120884	0.0860394	0.0887385	0.0860574	0.0686423
ATP6AP2	-0.00699157	0.0369548	28.1624	27.3193	26.3332	27.0737
ATP6V0A1	0.00729135	0.0184771	1.33563	1.37922	1.23337	1.35415
ATP6V0A2	0.0722972	3.26298	28.1996	28.4967	25.9404	25.722
ATP6V0A4	2.67417	0.951343	0.00892859	0.0175754	0.00399479	0
ATP6V0B	-0.0583616	1.01936	20.3352	19.6129	19.9755	19.8742
ATP6V0C	0.135578	1.5842	12.7661	12.9606	11.1068	11.3289
ATP6V0D1	-0.0310355	0.140451	18.4704	17.9298	18.5154	17.1177
ATP6V0E1	-0.024827	0.166673	58.1671	58.676	57.0985	56.7842
ATP6V0E2	-0.0946241	2.18324	6.53487	6.65333	6.79808	6.69347
ATP6V0E2-AS1	0.225851	0.969585	2.14644	2.06644	1.68598	1.76483
ATP6V1A	-0.0163135	0.154909	22.9884	22.7184	22.1422	22.1431
ATP6V1B1	-0.873635	0.296778	0.0319899	0.0472277	0.0699734	0.0691491
ATP6V1B1-AS1	0.278474	0.420362	1.17632	0.908844	0.877174	0.769755
ATP6V1B2	-0.154663	6.54701	26.004	25.7438	27.8046	27.3812
ATP6V1C1	-0.109082	4.12925	17.4303	17.7712	18.2249	18.1485
ATP6V1C2	0.0958665	0.165204	0.625719	0.769408	0.597239	0.65344
ATP6V1D	-0.015418	0.0578837	14.467	14.8009	13.983	14.357
ATP6V1E1	-0.10917	2.9063	20.7584	20.228	20.7023	21.6464
ATP6V1E2	0.0272027	0.0628325	6.51008	6.62392	5.92965	6.41679
ATP6V1F	-0.0408387	0.503061	50.7657	50.782	50.1544	49.9239
ATP6V1G1	-0.234227	17.6546	67.8164	64.6168	74.7743	74.4579
ATP6V1G2	0.331866	0.649631	0.0680297	0.0621737	0.0444484	0.0546196
ATP6V1G3	-0.414331	0.150366	0.0685634	0.0882452	0.113266	0.0870583
ATP6V1H	-0.131127	3.07279	8.12581	8.12313	8.50259	8.5452
ATP7A	-0.100399	0.759361	1.06007	1.08455	1.06056	1.14192
ATP7B	-0.351554	0.446978	0.0269015	0.0306241	0.0320964	0.0382148
ATP8A1	-0.0102511	0.255231	31.9836	32.0321	30.7543	31.0104
ATP8A2	0.511057	0.167245	0.00868355	0.00854654	0.0051802	0.00639897
ATP8B1	-0.0544712	0.213422	2.68874	2.6617	2.63599	2.68686
ATP8B2	0.066646	0.136656	0.894235	0.921447	0.759699	0.9009
ATP8B3	0.0529556	0.0639857	0.200544	0.175522	0.18146	0.165834
ATP8B4	0.092957	0.0220128	0.00502795	0.00764786	0.00654423	0.00485036
ATP8B5P	-0.105477	0.0806008	0.109839	0.160872	0.13261	0.146465
ATP9A	0.337571	0.303602	0.105418	0.0997644	0.0886877	0.0669273
ATP9B	0.0533181	0.204977	1.95058	2.04855	1.91705	1.77572
ATPAF1	-0.117523	1.49933	4.6744	4.6329	4.89103	4.78248
ATPAF2	0.105966	0.552507	9.71169	9.52575	8.62885	8.49585
ATPIF1	-0.0862043	3.78719	46.3339	46.3288	46.9863	47.2513
ATR	-0.0475473	2.25699	34.4883	34.9956	34.5106	34.2884
ATRAID	-0.00125037	0.00718799	22.4893	22.2835	21.69	21.2411
ATRIP	0.0479678	0.310301	3.68153	3.50906	3.36639	3.29694
ATRN	-0.304527	9.39539	1.37641	1.37127	1.63925	1.61177
ATRNL1	-0.0591896	0.543544	3.53296	3.59886	3.50999	3.60842
ATRX	-0.0766449	3.31763	7.48602	7.66745	7.62989	7.67974
ATXN1	2.33045	7.54827	0.0464627	0.0500168	0.0115489	0.00684774
ATXN10	0.0328154	0.859552	34.3669	34.0754	32.045	32.0487
ATXN1L	-0.140924	4.53614	8.60601	8.57018	9.20848	8.93575
ATXN2	0.0937373	1.06553	2.24448	2.25549	2.05171	1.98833
ATXN2-AS	-0.0881757	0.0602768	2.10805	1.61372	2.05783	1.73231
ATXN2L	0.384027	89.7542	7.31894	7.30909	5.34501	5.3936
ATXN3	0.0615711	0.939802	0.362997	0.360614	0.328756	0.335489
ATXN7	-0.0959457	1.44024	2.4027	2.37368	2.39169	2.49847
ATXN7L1	0.440629	6.57281	0.847967	0.89844	0.639554	0.593388
ATXN7L2	-0.379769	4.34121	0.83956	0.82532	1.03299	1.04223
ATXN7L3	-0.0752023	2.70557	19.3823	19.369	19.7787	19.3335
ATXN7L3B	-0.022693	0.332478	41.1038	41.1057	39.8232	40.1825
AUH	0.0592605	0.186889	1.3982	1.42274	1.28163	1.31208
AUNIP	0.00518021	0.0195537	9.45322	9.33824	8.8828	9.0545
AUP1	0.0194303	0.254097	30.1703	29.5637	28.2078	28.2515
AURKA	-0.445811	101.113	6.1058	6.03755	7.96576	7.88004
AURKAIP1	0.000629889	0.00447162	42.0271	43.0894	41.2141	40.2981
AURKAPS1	-0.111235	0.159428	1.6638	1.54547	1.68214	1.63869
AURKB	-0.143182	4.61095	5.15557	5.03495	5.43325	5.34803
AURKC	-0.164089	0.0677437	0.101088	0.0731567	0.10642	0.0806272
AUTS2	0.270129	5.57298	1.9231	1.92807	1.58398	1.47582
AVEN	0.0617337	0.333001	15.0149	15.1953	13.8352	13.8944
AVIL	0.049921	0.0726413	1.25231	1.27669	1.17308	1.1674
AVL9	-0.100566	4.76664	19.6328	19.8676	20.5351	20.0409
AVPI1	-0.302135	0.444686	0.827575	0.93815	1.07555	1.0106
AVPR1A	0.844588	0.108992	0.00524379	0.00645132	0.0062564	0
AVPR1B	0.554106	0.0856531	0.0289763	0.034223	0.0207431	0.0204988
AVPR2	0.056321	0.0914887	0.896078	0.871732	0.829061	0.799729
AXDND1	0.114663	0.0455766	0.0383128	0.0623638	0.042195	0.0469102
AXIN1	0.0845174	1.04991	4.23003	4.28674	3.88531	3.80996
AXIN2	0.0275466	0.0330185	0.656508	0.717945	0.644034	0.647915
AXL	0.704118	0.37251	0.0151814	0.0276425	0.00996219	0.0152148
AZGP1	-0.402358	0.155079	0.122087	0.160214	0.23306	0.124754
AZGP1P1	1.26932	0.578096	0.21763	0.0942462	0.0623173	0.0615832
AZI2	-0.17945	4.98708	4.74362	4.80078	5.09393	5.26053
AZIN1	-0.0425682	1.95342	25.2734	25.2192	25.1634	24.6592
AZIN1-AS1	0.2322	0.389145	1.40177	1.39765	0.981664	1.30065
AZIN2	0.418842	0.077318	0.00335114	0.00219884	0.00222126	0.00175607
B2M	-0.12251	20.3983	379.036	376.365	394.629	393.193
B3GALNT1	0.849365	0.202002	0.000588001	0.000723405	0.000350774	0.000346642
B3GALNT2	0.0970163	1.13934	6.77808	6.41181	5.7835	6.02966
B3GALT2	0.172966	0.280552	0.853837	0.726418	0.742456	0.600619
B3GALT4	-0.234492	0.88594	0.53723	0.579112	0.608997	0.649222
B3GALT6	-0.0190103	0.121897	21.7698	22.5772	21.946	21.1065
B3GAT3	0.087967	1.40742	6.54091	6.84782	6.10949	5.95933
B3GLCT	-0.375493	6.0697	3.09516	3.36876	3.89704	4.13651
B3GNT2	-0.137715	3.63579	10.3458	10.3352	10.838	10.9587
B3GNT4	-0.0147639	0.0113208	0.267899	0.277924	0.291556	0.2369
B3GNT5	-0.574213	1.79357	0.393501	0.345622	0.466518	0.587289
B3GNT7	0.0580211	0.0875279	1.22662	1.10969	0.997068	1.15233
B3GNT8	0.926588	1.44284	0.362045	0.502105	0.170165	0.265176
B3GNT9	0.204541	0.18039	0.406284	0.325131	0.303529	0.30443
B3GNTL1	0.15576	1.05118	0.930039	0.918611	0.812946	0.776928
B4GALNT1	0.233016	1.04356	0.895579	0.929728	0.774218	0.713871
B4GALNT3	-0.274066	0.301104	0.249229	0.310315	0.351095	0.297394
B4GALT1	0.163579	4.5837	14.4344	14.9872	12.8324	12.3349
B4GALT1-AS1	-0.375121	0.248913	0.133886	0.128306	0.134518	0.191092
B4GALT2	0.216622	2.98542	3.66811	3.54498	2.94268	3.00378
B4GALT3	0.088939	3.06731	16.346	16.3389	14.6948	14.7457
B4GALT4	-0.135	0.517483	1.72026	1.75037	1.88164	1.7698
B4GALT4-AS1	-0.100287	0.02079	0.152051	0.243184	0.249442	0.156866
B4GALT5	0.0243611	0.307586	25.9152	25.6584	24.335	24.2458
B4GALT6	0.699614	24.6788	2.04904	2.03181	1.15658	1.25036
B4GALT7	0.217748	3.99987	17.8551	18.671	15.4614	14.6324
B4GAT1	-0.101082	0.607528	8.16904	8.26485	8.30173	8.58429
B9D1	0.525442	2.43523	0.204406	0.205487	0.134245	0.138559
B9D2	0.158047	0.330736	3.49776	3.63929	3.11201	3.01644
BAALC	2.25866	0.773252	0.0148584	0.0292479	0.00886381	0
BAALC-AS1	-0.495849	0.0719703	0.0425868	0.0698581	0.135495	0.0167373
BAAT	0.176318	0.0717762	0.0509648	0.0413088	0.0375569	0.0406492
BABAM1	-0.153752	7.34927	19.2128	18.3068	20.0367	19.9485
BABAM2	0.00110725	0.00369566	0.977633	0.965992	0.89901	0.961397
BACE1	0.158349	0.643923	0.296502	0.267834	0.228599	0.255736
BACE1-AS	0.356195	0.414662	1.13346	1.37302	0.951095	0.925205
BACE2	1.09424	1.00988	0.0155236	0.0152787	0.00926064	0.00457578
BACH1	0.0223493	0.168797	4.71395	4.76554	4.54589	4.39655
BACH1-IT2	0.599716	0.358163	0.526	0.340925	0.290827	0.257148
BACH1-IT3	0.572394	0.0989407	0.17961	0.151522	0.153067	0.0605055
BACH2	-0.00969705	0.275311	34.2469	34.4543	33.183	33.0786
BAD	-0.0444754	0.191917	9.66272	9.31165	9.36738	9.37877
BAG1	-0.0642519	1.68621	7.54885	7.70156	7.64582	7.63011
BAG2	-0.0964365	1.35012	23.7326	22.7665	23.3313	24.2908
BAG3	0.149678	0.352839	1.72457	1.97304	1.5611	1.63235
BAG4	-0.0588429	1.04094	9.64255	9.85155	9.73819	9.71549
BAG5	-0.0807844	3.83914	11.2609	11.4404	11.5379	11.4635
BAG6	-0.049271	2.23627	1.70199	1.70363	1.69892	1.67714
BAGE	-0.801113	0.0972152	0.0216985	0.0320343	0	0.089543
BAHCC1	0.678792	0.416681	0.0310073	0.0344559	0.0250611	0.014152
BAHD1	-0.0555368	0.515021	3.81508	3.73976	3.77399	3.74764
BAIAP2	0.131825	0.18876	0.190183	0.224619	0.168009	0.194656
BAIAP2-AS1	0.301896	0.206356	0.192773	0.105152	0.121927	0.109537
BAIAP2L1	0.139392	0.089832	0.202124	0.196172	0.197614	0.148947
BAIAP2L2	0.512799	0.165925	0.0915086	0.0616233	0.0459703	0.056786
BAIAP3	0.578449	1.78819	0.0890797	0.0798727	0.0621477	0.0462842
BAK1	-0.0816221	0.804033	17.7533	17.2792	18.2868	17.2304
BAMBI	0.0760879	0.0167969	0.0656	0.0821736	0.056922	0.0773458
BANF1	0.0547838	0.721592	33.7259	32.5718	30.4358	30.709
BANK1	2.09913	1.03174	0.0212603	0.0125549	0.00253658	0.0050134
BANP	0.0235968	0.12929	2.5494	2.5425	2.42742	2.37172
BAP1	0.0310605	0.542074	40.1399	39.9562	37.5471	37.5515
BARD1	-0.167387	12.3895	3.6373	3.73467	3.91016	4.02107
BARHL1	0.690513	0.125863	0.0754663	0.0106108	0.0128628	0.0381337
BARX2	1.99978	0.303602	0.0116431	0.0458377	0	0.0137278
BASP1	-0.151819	5.29452	18.8776	19.5177	20.3783	20.4881
BATF	-0.261403	0.581028	2.826	2.99702	2.84897	3.83567
BATF2	-1.15018	2.00126	0.0400003	0.0705365	0.113346	0.121836
BATF3	0.583812	1.35151	1.45871	1.71457	0.976623	1.05173
BAX	-0.115854	1.96697	6.25514	6.39751	6.66162	6.47421
BAZ1A	-0.124981	14.0986	20.6106	20.5625	21.4817	21.5321
BAZ1B	-0.0899279	18.6557	105.19	105.175	106.949	107.544
BAZ2A	0.0193325	0.250458	5.39958	5.4249	5.12044	5.11163
BAZ2B	-0.0469975	0.426531	1.48307	1.45851	1.44813	1.46317
BBC3	0.795465	6.49607	0.771167	0.728146	0.461912	0.365916
BBIP1	-0.161474	1.0448	1.15748	1.15594	1.185	1.29349
BBOF1	0.345064	0.320593	0.255342	0.297006	0.166173	0.250233
BBS1	0.0885722	0.192613	1.76005	1.62082	1.5083	1.53745
BBS10	0.166049	1.59962	6.36269	5.89276	5.36525	5.09929
BBS12	0.0865694	0.132632	0.490785	0.498184	0.444217	0.448054
BBS2	-0.119032	1.47991	11.9697	11.7592	12.705	11.9843
BBS4	-0.158421	1.89046	1.80375	1.91008	1.98385	1.98723
BBS5	0.146624	0.0374489	0.0554779	0.038543	0.0506167	0.0307818
BBS7	-0.15263	2.71942	5.28224	5.38547	5.7074	5.65331
BBS9	0.134833	0.88489	0.230762	0.221836	0.200692	0.194221
BBX	-0.0876998	1.70359	2.60742	2.64928	2.63102	2.72046
BCAM	1.00045	0.155079	0.00701173	0.0103516	0.00418287	0.00413359
BCAN	1.90322	0.422036	0.0130205	0.0096113	0.00388371	0.00191898
BCAP29	-0.0524854	0.520946	2.9028	2.95698	2.88301	2.9387
BCAP31	0.0677071	1.19393	13.1899	13.3522	12.3423	11.9212
BCAR1	-0.17181	1.08575	0.369894	0.387778	0.399649	0.418003
BCAR3	-0.146198	1.79871	1.69192	1.74921	1.8267	1.82168
BCAR4	-0.487764	0.119843	0.0197468	0.0194353	0.0176701	0.0349238
BCAS1	-0.374804	0.318144	0.0553399	0.0513244	0.0596777	0.0727772
BCAS2	-0.066405	1.1509	56.8454	57.1663	57.0346	57.3353
BCAS3	0.0564982	0.100563	0.29922	0.273901	0.257797	0.270099
BCAS4	-0.224212	17.0867	27.4215	27.4526	30.1223	31.2841
BCAT1	-0.110091	59.6355	31.0419	31.3605	32.3043	32.2197
BCAT2	0.106397	1.79151	10.567	10.3169	9.18524	9.39844
BCCIP	-0.0459209	0.886555	22.943	22.8626	22.5908	22.7103
BCDIN3D	0.0617927	0.147499	2.42124	2.32082	2.14586	2.2063
BCDIN3D-AS1	0.370577	0.939856	0.296263	0.317624	0.228811	0.226116
BCHE	1.37981	0.489584	0.024325	0.020521	0.0124381	0.00409721
BCKDHA	-0.118364	2.44449	14.8844	14.5379	15.3666	15.2302
BCKDHB	-0.0132196	0.0792113	4.97205	5.1253	4.78832	4.97394
BCKDK	-0.0333072	0.209463	6.45543	6.54316	6.5111	6.23356
BCL10	-0.235833	7.31619	6.13742	6.22889	7.06852	6.88325
BCL11A	-0.105732	3.42223	7.15623	7.16044	7.33641	7.4219
BCL11B	0.163679	0.0275725	0.00194101	0.00254718	0.00231583	0.0015257
BCL2	0.911016	15.0231	1.22473	1.10823	0.630334	0.558415
BCL2A1	0.0663367	0.0527701	0.629864	0.791513	0.670978	0.62992
BCL2L1	0.211271	9.80499	3.14892	3.11143	2.57508	2.60528
BCL2L10	0.160876	0.0171759	0.00804343	0.0197913	0.014395	0.00948362
BCL2L11	-0.0150326	0.0751209	0.505072	0.51556	0.494787	0.493262
BCL2L12	-0.00530485	0.0237085	2.033	2.0738	1.97676	1.97222
BCL2L13	-0.0528464	0.840655	1.36422	1.34318	1.33856	1.35186
BCL2L15	0.197893	0.227783	0.285037	0.313067	0.224256	0.275191
BCL2L2	0.12234	0.786024	2.4981	2.43892	2.09422	2.25046
BCL3	0.536697	2.36557	1.75944	1.75891	1.25424	1.06985
BCL6	0.0704944	8.14854	48.7125	48.2849	44.4482	44.0458
BCL7A	0.0390928	1.31039	37.29	36.3915	34.3086	34.3906
BCL7B	-0.199887	11.6311	11.8818	12.0099	13.1664	13.1242
BCL7C	-0.477667	7.90188	3.46692	3.99576	5.08358	4.87361
BCL9	-0.0602145	0.222941	2.5119	2.32194	2.37697	2.45076
BCL9L	-0.15706	0.458608	0.642625	0.691291	0.689098	0.735772
BCLAF1	-0.130128	26.6442	15.3783	15.4652	16.0963	16.2412
BCLAF3	-0.117097	0.496017	1.52344	1.53525	1.60412	1.57402
BCO1	1.09568	0.245977	0.0297367	0.0376297	0.0101369	0.0200349
BCO2	0.0804641	0.0432255	0.0501567	0.0390502	0.0419789	0.0388365
BCOR	-0.0477857	0.790151	3.76493	3.84146	3.76828	3.76436
BCORL1	-0.269564	0.430576	0.0987208	0.106949	0.117784	0.119747
BCR	0.0061047	0.0877291	22.4509	22.7488	21.5988	21.5213
BCRP2	0.0962655	0.0328921	0.114626	0.0954607	0.0946805	0.0935652
BCRP3	-0.454825	0.0804674	0.0434277	0.028495	0.0431782	0.0512035
BCS1L	0.0917109	1.26726	4.66839	4.88527	4.27188	4.31721
BCYRN1	1.4267	0.19382	0.548846	0	0.130966	0.0647118
BDH1	0.0629081	0.899964	6.71208	6.77079	6.27801	6.08834
BDH2	-0.239828	4.39087	7.59352	7.86596	8.7611	8.72859
BDNF	0.817081	0.198373	0.00207261	0.00116566	0.00158969	0.000174551
BDNF-AS	0.830137	0.365655	0.0180885	0.0296718	0.0129489	0.0127964
BDP1	-0.0353355	1.01533	20.6756	20.7933	20.1966	20.5157
BEAN1	2.76591	0.725668	0.00801273	0.00701005	0.00212445	0
BECN1	-0.0882834	1.48528	7.04503	6.95951	7.15762	7.10556
BEGAIN	1.58673	0.367458	0.0132725	0.0149292	0.00452442	0.00447112
BEND3	-0.0702066	0.90812	7.94239	7.9552	7.9121	8.0771
BEND3P3	0.0473169	0.0739633	0.721335	0.733846	0.678573	0.67058
BEND4	-0.0493503	1.2302	8.78073	8.55848	8.6441	8.54502
BEND6	0.139436	0.244991	0.498837	0.497343	0.450239	0.416292
BEND7	0.853726	0.11927	0.0143812	0.00707717	0.00571945	0.00565208
BEST1	0.278118	0.355422	0.0945437	0.113645	0.0795152	0.0849745
BEST2	0.587734	0.110666	0.0323937	0.0478239	0.0128831	0.0381939
BEST3	0.247107	25.4009	9.03694	9.28513	7.29658	7.49297
BEST4	-0.13884	0.176331	0.939297	0.808312	0.915321	0.927732
BET1	-0.153374	3.84237	5.05245	5.23241	5.43913	5.51931
BET1L	0.141054	2.67879	7.55333	7.64446	6.66228	6.54181
BFAR	-0.101164	2.63145	13.0018	13.0981	13.5178	13.3033
BFSP1	-0.35548	0.231992	0.0307864	0.0530261	0.0631322	0.0397018
BFSP2	-0.314844	1.01849	1.74543	1.89805	2.21508	2.12733
BFSP2-AS1	0.0291349	0.0317174	0.682997	0.69558	0.566332	0.727558
BGLAP	0.553198	0.171326	0.138882	0.31439	0.0828508	0.212875
BHLHA15	1.40231	5.4963	2.15459	2.13492	0.920572	0.635093
BHLHE22	1.00851	0.206085	0.0332443	0.0118981	0.00721163	0.0142534
BHLHE23	-3.63968	0.702579	0	0.0095658	0.0231919	0.091675
BHLHE40	3.37816	1.30397	0.0406606	0.0466889	0.00808541	0
BHMG1	1.5921	0.334209	0.0299771	0.0258161	0	0.0176723
BHMT	2.12727	0.332604	0.00411854	0.0405356	0.00982773	0
BHMT2	-0.81482	0.101994	0	0.00991313	0.00961362	0.00712528
BICC1	-1.1408	1.50831	0.0395471	0.0481905	0.0943678	0.0910358
BICD1	0.116507	0.868154	3.15164	3.05328	2.67058	2.81212
BICD2	-0.00110616	0.0160083	37.8162	37.8792	36.4928	36.0816
BICDL1	-0.0994973	1.05678	2.76636	2.61463	2.73866	2.78408
BICDL2	-0.366593	0.205813	0.187954	0.151354	0.23784	0.181315
BICRA	-0.0979693	0.191278	0.745908	0.716492	0.768008	0.731478
BICRAL	-0.135353	4.0062	5.01612	5.10667	5.2376	5.41382
BID	-0.0674022	0.853547	3.67577	3.58427	3.67076	3.61708
BIK	-0.542036	104.797	94.4602	96.0706	131.495	134.274
BIN1	-0.209123	0.0695026	0.00649412	0.00479374	0.00355125	0.00893305
BIN2	1.1165	46.9234	1.88407	1.98175	0.848803	0.859325
BIN3	-0.0501433	0.250105	15.4565	16.07	16.4559	14.8202
BIN3-IT1	0.37491	0.50231	0.725922	0.637525	0.586284	0.421366
BIRC2	-0.179142	13.4105	11.205	11.2069	12.1102	12.1992
BIRC3	-0.19547	59.9797	36.4481	36.3743	40.0595	39.8287
BIRC5	-0.105861	8.83749	28.9766	28.5994	29.5893	29.7676
BIRC6	-0.0546144	5.80721	39.0933	39.3355	38.7184	39.3154
BIRC6-AS2	-0.219382	0.258919	1.94409	2.17199	2.4031	2.18894
BISPR	0.0167897	0.0486085	4.50183	4.33034	4.26552	4.09809
BIVM	0.206037	0.0463204	0.0203957	0.0129047	0.0139053	0.0137415
BLACAT1	-0.539686	0.225328	0.102084	0.0386438	0.131167	0.0648108
BLCAP	0.0836832	1.49947	4.56191	4.68795	4.16879	4.1935
BLK	-0.0729124	4.48086	46.3843	46.5515	47.0971	46.5543
BLM	-0.126692	7.1067	7.10338	7.19484	7.41001	7.54505
BLMH	0.0452882	0.901407	49.179	49.5313	45.6303	46.0129
BLNK	-0.0524698	0.744546	5.55849	5.52059	5.58722	5.42025
BLOC1S1	-0.113989	0.686718	5.59161	5.79383	5.90776	5.89691
BLOC1S2	-0.168542	4.73456	3.11393	3.25681	3.44469	3.41531
BLOC1S3	0.0213138	0.0510226	4.42681	4.39583	4.2781	4.05077
BLOC1S4	-0.0364156	0.121549	10.7085	10.8011	10.9455	10.19
BLOC1S5	0.798602	0.334692	0.0281892	0.0214388	0.00917255	0.018129
BLOC1S6	-0.0409882	1.12839	3.95432	3.89234	3.89817	3.83574
BLVRB	-0.0967912	1.16792	44.3703	43.0648	45.0675	44.5082
BLZF1	-0.206042	0.812769	2.70851	3.14629	3.14806	3.3218
BMF	0.272311	4.08983	1.06195	1.08865	0.84963	0.856307
BMI1	0.239296	0.41977	0.672224	0.626174	0.551399	0.502443
BMP1	0.153364	0.195246	0.168816	0.142307	0.145467	0.122559
BMP10	0.488609	0.113222	0.0217056	0.0131465	0.0159367	0.00787447
BMP2K	0.0347921	0.513328	17.6288	17.4933	16.5166	16.3295
BMP3	-0.108517	7.55775	32.5434	32.3334	33.177	33.8291
BMP5	0.570532	0.0981927	0.00354125	0.00784209	0.00316881	0.00417531
BMP6	-0.314208	9.98753	7.79063	7.61422	9.31126	9.03818
BMP7	0.117019	13.8153	76.2793	76.1653	67.8515	66.8177
BMP7-AS1	0.620687	1.05087	1.15056	0.962046	0.619556	0.696293
BMP8A	0.229722	1.05229	1.24571	1.22066	1.05041	0.964814
BMP8B	0.102762	0.140185	0.517967	0.547557	0.490831	0.459917
BMPER	0.419372	0.0593616	0.0122793	0.00805701	0.00732523	0.00723894
BMPR1A	-0.196285	2.20762	4.82549	5.11943	5.5534	5.36371
BMPR1B	0.28881	0.132486	0.0164727	0.0134334	0.0123537	0.0110984
BMPR2	-0.184096	3.12108	2.22344	2.26795	2.45577	2.43287
BMS1	0.00893637	0.0866713	20.4808	19.9046	19.0799	19.3693
BMS1P14	-0.0605567	0.0875279	0.118877	0.122418	0.120821	0.120263
BMS1P20	0.0113782	0.0703967	31.8268	31.9459	30.5154	30.1015
BMS1P21	0.792276	0.142914	0.0631984	0.099522	0.0603219	0.0298057
BMS1P4	0.134931	0.695758	6.23813	6.51825	5.70779	5.42313
BMS1P5	0.326771	0.283749	0.0874619	0.086082	0.0681183	0.0644513
BMS1P6	0.528185	0.580115	0.073357	0.0829757	0.0483335	0.0555096
BMT2	0.181908	4.23818	10.6988	10.861	9.07904	9.12884
BMX	-0.0974509	0.0112401	0.00538267	0.00397331	0.0064221	0.00317323
BNC2	2.48683	1.65356	0.00453567	0.00656486	0.000636651	0.0012583
BNIP1	-0.136526	0.898502	2.78602	2.91581	3.05286	2.9523
BNIP2	-0.0561499	2.42857	12.4101	12.7201	12.576	12.4556
BNIP3	-0.410031	112.682	100.325	100.189	127.722	127.519
BNIP3L	-0.638679	232.467	19.1912	19.1727	28.4061	28.8141
BNIPL	0.0531549	0.0446266	0.293112	0.343965	0.298601	0.289767
BOC	-0.167652	0.024212	0.00380056	0.00561089	0.00340086	0.00672159
BOD1	0.17023	4.21472	13.5968	13.5173	11.7808	11.3051
BOD1L1	-0.0904454	6.18451	20.0574	20.2779	20.5153	20.6269
BOD1L2	0.3557	0.0427106	0.0122695	0.0120759	0.0146388	0.00361659
BOK	-0.259587	0.0713176	0.054386	0.0420576	0.0556185	0.0549634
BOLA1	-0.126307	0.186527	0.911699	0.763387	0.909167	0.842304
BOLA2-SMG1P6	-0.0160317	0.0187662	0.252049	0.266658	0.26056	0.242003
BOLA3	0.0472914	0.270036	29.5327	30.4342	28.2417	27.359
BOLA3-AS1	-0.108794	0.143505	0.246617	0.274484	0.247492	0.290774
BOLL	1.57423	1.17571	0.0209413	0.0163466	0.00689248	0.00510846
BOP1	0.148357	9.53866	61.5933	61.12	53.9842	52.0934
BORA	-0.296446	31.4727	10.8232	10.9486	12.7511	12.8647
BORCS5	0.0709491	0.346462	1.04222	0.997657	0.933428	0.926967
BORCS6	0.0584218	0.176497	5.89087	5.88241	5.60738	5.22504
BORCS7	-0.196559	2.06962	3.98712	4.27236	4.55508	4.51333
BORCS8	-0.115418	0.510074	3.71522	3.63238	3.90006	3.72565
BPESC1	4.70448	1.05746	0.0116929	0.0230168	0	0
BPGM	-0.136778	1.90033	5.14323	5.23315	5.44661	5.48282
BPHL	-0.118955	0.389408	0.912901	1.00939	1.01739	0.982761
BPIFB1	6.23212	10.6831	0.983752	0.69075	0	0.0212176
BPIFB2	0.670449	0.0763715	0.0107809	0.0318324	0.0257255	0
BPIFB3	1.13904	0.193999	0.0333011	0.0393309	0.0158927	0.0157055
BPIFB6	1.55092	0.27049	0.0304778	0.0524947	0.0181817	0.00898374
BPIFC	0.532338	0.0646635	0.0208924	0.0257035	0	0.0307916
BPNT1	-0.564186	130.874	11.5106	11.4873	16.0149	16.5596
BPTF	-0.211332	44.1336	13.6909	13.7106	15.0142	15.3772
BRAF	0.203074	6.13577	17.3686	17.6362	14.8341	14.2998
BRAP	-0.050217	0.552507	14.857	15.1924	14.7954	15.0121
BRAT1	0.0489438	0.829718	8.30225	8.18289	7.6643	7.60188
BRCA1	-0.0167426	0.249315	5.2784	5.27614	5.09124	5.13806
BRCA2	-0.00790419	0.0565849	7.8934	7.8738	7.55807	7.6299
BRCAT54	0.199199	0.254721	0.334677	0.305203	0.295531	0.238544
BRCC3	-0.0268371	0.169604	5.41077	5.44161	5.39273	5.19984
BRD1	0.00781203	0.0483567	2.21002	2.26255	2.12924	2.13251
BRD2	0.0405264	2.29766	2.96531	2.96619	2.77949	2.74568
BRD3	0.393577	5.99412	2.71416	2.7396	2.08191	1.89597
BRD4	-0.0104886	0.0662817	6.25939	5.95122	5.85471	5.9279
BRD7	0.045282	1.06708	33.6408	33.2708	31.3542	30.7685
BRD7P3	0.138146	0.0913691	0.362974	0.279228	0.243911	0.314825
BRD8	0.0278928	0.272078	4.39242	4.30311	4.11157	4.05935
BRD9	0.0781616	1.38594	6.42483	6.65167	5.89805	5.969
BRDT	1.26638	0.210469	0.00178037	0.00350457	0	0.00209915
BREA2	-0.250653	0.148367	0.48238	0.414161	0.391851	0.629257
BRE-AS1	-0.458337	0.497388	0.420936	0.304628	0.516993	0.437917
BRF1	-0.0233183	0.108082	1.57624	1.69155	1.57656	1.60517
BRF2	-0.143936	1.04904	7.58444	7.45971	8.1104	7.81479
BRI3	0.11467	0.744546	11.8264	11.8781	10.4878	10.4865
BRI3BP	-0.100134	3.6849	85.0836	85.7074	86.7017	88.6746
BRICD5	0.220103	1.24842	8.46106	8.6922	7.00075	7.10718
BRINP1	-0.796659	0.0993211	0.0160969	0	0.0153643	0.0113875
BRINP3	2.26218	0.42275	0.0105014	0.0103358	0.00417645	0
BRIP1	-0.173505	10.7234	12.1848	12.3584	13.2104	13.3073
BRIX1	-0.187631	12.814	80.8803	80.8038	87.4917	88.9138
BRK1	-0.139338	5.71525	75.6063	73.9742	78.2951	79.5289
BRMS1	-0.00698318	0.0463747	30.6384	31.5143	30.2379	29.5979
BRMS1L	-0.407302	5.32805	3.56069	3.62225	4.41955	4.70598
BROX	-0.125822	3.99345	4.8212	4.67286	4.94179	4.9821
BRPF1	-0.108732	3.51041	4.74879	4.68964	4.93086	4.81932
BRPF3	-0.00145862	0.00518548	4.7987	4.6087	4.5049	4.51627
BRSK1	0.234092	3.92157	8.02102	8.11879	6.51459	6.6315
BRSK2	0.59072	0.23719	0.0100582	0.00791962	0.00288013	0.0085386
BRWD1	-0.15752	21.3488	8.10425	8.22267	8.69858	8.74757
BRWD1-AS1	-0.108702	0.0356028	0.358026	0.293648	0.444962	0.228654
BRWD1-IT2	0.104932	0.107845	2.11785	1.54328	1.62785	1.63269
BRWD3	-0.081458	2.73491	9.39901	9.42895	9.45001	9.63476
BSCL2	0.0438559	0.0418401	0.194013	0.224453	0.203051	0.185944
BSDC1	-0.00148084	0.00571445	1.75656	1.70154	1.62275	1.69329
BSG	0.0795735	3.20726	17.9452	17.5719	16.0856	16.1136
BSN	0.814798	4.15001	0.198227	0.181797	0.119789	0.0872657
BSN-AS2	0.231153	0.0752334	0.0907917	0.0699333	0.075356	0.0558512
BSPRY	0.119237	1.18544	3.82819	3.92113	3.42204	3.41322
BST1	-0.607875	2.59038	1.221	1.18801	1.78144	1.73578
BST2	0.0495867	0.689224	80.1336	81.3099	73.9431	75.4946
BTAF1	-0.0416712	1.83241	42.7266	42.8014	41.9193	42.4178
BTBD1	-0.179777	32.6452	40.8762	41.0017	44.5064	44.3445
BTBD10	-0.259348	10.604	6.0638	5.99669	6.85225	6.97683
BTBD16	-1.32084	0.384589	0.0110211	0.0108472	0.0328734	0.0194917
BTBD18	0.0303822	0.0377894	1.03477	1.06157	0.932979	1.03326
BTBD19	1.06446	1.70295	0.400299	0.5167	0.180079	0.239856
BTBD2	0.131694	3.16762	22.9501	23.072	20.459	19.7866
BTBD3	4.70815	1.07056	0.0022224	0.00218734	0	0
BTBD6	-0.255675	1.494	3.70249	3.58292	3.91703	4.41428
BTBD7	-0.238682	12.0372	3.49934	3.44798	4.00674	3.84666
BTBD8	0.0299487	0.0333752	2.39813	1.79832	2.05225	1.88501
BTBD9	0.0937036	0.320157	0.291418	0.293213	0.252932	0.271884
BTBD9-AS1	0.0018098	0.000113547	0.0631595	0.0932444	0.056517	0.0930854
BTD	-0.151698	0.18876	0.0852079	0.0737999	0.0836534	0.0855384
BTF3	-0.229206	67.7056	160.553	158.447	178.542	179.678
BTF3L4	-0.0576645	0.858517	5.48525	5.44239	5.38135	5.51396
BTG1	0.174497	9.95857	25.4304	26.1498	21.4961	22.288
BTG2	-0.206195	30.8505	73.8367	75.0284	81.8255	82.702
BTG3	-0.157068	1.4479	6.22209	5.87843	6.58313	6.34264
BTK	0.0202848	0.300446	23.5824	23.5065	21.9837	22.4968
BTLA	-0.584214	12.6815	1.53534	1.54169	2.19663	2.22281
BTN1A1	-0.465307	0.245936	0.0757847	0.0923483	0.0904192	0.131904
BTN2A1	-0.0516812	0.279421	2.62528	2.70461	2.75372	2.53933
BTN2A2	0.185088	2.50124	1.33763	1.31706	1.1107	1.12624
BTN2A3P	0.10979	0.189229	1.4964	1.38304	1.2364	1.31959
BTN3A1	0.423052	13.3986	2.0849	1.97862	1.47538	1.42815
BTN3A2	0.202053	10.6338	4.63323	4.70778	3.88995	3.88952
BTN3A3	0.324317	6.25817	2.60824	2.64808	1.97693	2.04478
BTNL2	0.265315	0.151093	0.0358026	0.0453056	0.0254264	0.0391979
BTNL9	5.36941	1.77281	0.0160869	0.0217704	0	0
BTRC	-0.122584	1.54811	1.80283	1.71852	1.82644	1.84601
BUB1	-0.242975	62.6428	26.3206	26.0863	29.7242	29.6913
BUB1B	-0.0618725	3.7137	75.0535	76.3926	75.8197	75.6294
BUB1B-PAK6	0.498273	0.201083	0.034864	0.0237558	0.0175985	0.0221342
BUB3	-0.188609	45.7261	78.2702	78.7538	85.9003	85.5436
BUD13	-0.147417	3.69456	12.3341	12.2661	13.0249	13.0777
BUD23	-0.0731687	1.77189	18.5565	18.5014	18.7239	18.6254
BUD31	-0.111157	2.57322	59.2546	60.7453	62.6438	61.5324
BVES	2.3833	0.481748	0.00373645	0.00429042	0	0.00146849
BYSL	-0.105809	2.36702	31.4683	31.3793	32.0491	32.7395
BZW1	-0.194913	35.9773	9.07795	9.11337	9.95709	9.99146
BZW2	-0.0342018	0.791659	34.7845	34.5388	34.333	33.6746
C10orf105	0.873854	4.41257	0.271275	0.304986	0.130487	0.170669
C10orf107	4.82447	1.17674	0.0577059	0.0486818	0	0
C10orf111	-0.461212	0.253698	0.125895	0.165211	0.207427	0.17671
C10orf128	4.32197	1.34618	0.0107922	0.0188835	0	0.00141384
C10orf25	0.0299342	0.0161417	0.272867	0.146949	0.184279	0.209425
C10orf55	1.76857	0.467783	0.0368304	0.0322216	0.00976503	0.00965
C10orf71	1.67938	0.773206	0.0330263	0.0286811	0.0139073	0.00458115
C10orf76	-0.0704166	0.43062	6.41495	6.40297	6.19029	6.70238
C10orf88	-0.107714	0.684819	6.29596	6.8753	6.55788	7.03835
C10orf90	0.819756	0.113743	0.00607742	0.00132923	0.00402834	0
C10orf91	0.188253	0.0712495	0.390987	0.357331	0.283226	0.345746
C10orf95	0.195633	0.315729	1.52517	1.56996	1.35225	1.23733
C11orf1	-0.0429743	0.144417	7.95252	8.61722	8.25202	8.10364
C11orf16	0.80849	0.586582	0.171235	0.200134	0.11492	0.0883292
C11orf21	0.26679	0.0978009	0.0353029	0.0227646	0.0261435	0.0200943
C11orf24	0.0371952	0.302122	19.3847	20.5228	18.3565	18.9027
C11orf42	0.0942802	0.0545804	0.549183	0.629127	0.601526	0.456445
C11orf44	4.92898	1.28069	0.017376	0.0228024	0	0
C11orf45	1.15727	0.580567	0.0170978	0.0196327	0.00906643	0.00671972
C11orf49	-0.0104684	0.0428884	2.93489	2.83722	2.75544	2.81426
C11orf53	0.73638	0.230133	0.136391	0.0922893	0.0711939	0.0603045
C11orf54	-0.0380862	0.277367	1.15694	1.10675	1.10646	1.12007
C11orf57	0.0739634	2.03582	4.633	4.63095	4.23977	4.19184
C11orf58	-0.0958912	5.22677	43.2432	42.5228	43.5626	44.2459
C11orf63	1.55648	0.271972	0.0136872	0.00769783	0.00466578	0.00230541
C11orf65	0.131213	0.118627	0.622119	0.594025	0.443137	0.620382
C11orf68	0.112236	0.567303	4.51934	4.59749	3.91505	4.16474
C11orf70	1.58807	0.367763	0.030109	0.0259297	0.00898082	0.00887503
C11orf71	-0.115332	0.595134	4.51825	4.48312	4.69829	4.64294
C11orf72	0.265112	0.0653307	0.080315	0.0457645	0.0806942	0.0199359
C11orf74	1.7926	0.32008	0.00292114	0.0158128	0	0.00516626
C11orf80	0.114925	2.05402	11.4294	11.4617	10.2139	10.0376
C11orf84	-0.0542898	0.644298	31.0125	31.8903	30.8544	31.7177
C11orf87	1.4893	0.320203	0.0138344	0.0102121	0.00412649	0.00407788
C11orf94	0.124591	0.117316	3.48675	3.87454	3.1536	3.31537
C11orf95	0.0398471	0.28011	7.88941	8.0167	7.55316	7.27107
C11orf98	-0.0285236	0.0197984	0.762344	0.771158	0.7327	0.765682
C12orf10	0.0710772	0.700087	34.0613	34.3266	31.5561	30.8137
C12orf29	-0.106292	1.44915	14.5521	15.5874	15.5299	15.5537
C12orf4	-0.0970689	1.02811	0.984423	0.935953	0.968448	0.999173
C12orf40	1.07463	0.54522	0.0354805	0.0214897	0.0146534	0.0112628
C12orf42	-0.112092	0.0195537	0.0101681	0.0087567	0.00909871	0.0104901
C12orf43	0.0525268	0.284313	1.49261	1.37958	1.3243	1.32873
C12orf45	0.0713821	0.47448	42.9801	43.8385	39.1732	39.9845
C12orf49	-0.0743534	4.32682	42.3227	42.0343	42.8343	42.2563
C12orf50	1.68755	0.394537	0.0727902	0.0238806	0.0072372	0.0214558
C12orf57	0.214938	6.83762	11.2968	11.4561	9.37587	9.40484
C12orf60	-0.0806646	0.10786	2.20061	2.53436	2.40767	2.39007
C12orf65	0.163466	2.84345	6.8258	7.03135	5.87503	5.9783
C12orf66	0.012151	0.045552	3.74501	3.63128	3.56762	3.43987
C12orf71	-1.11903	0.146596	0.0425868	0	0.0508106	0.037659
C12orf73	0.0816546	0.334411	8.34434	8.8104	8.02107	7.51127
C12orf75	-0.034277	0.284305	43.5591	42.8199	41.8143	42.9233
C12orf76	-0.0650206	0.34036	10.7443	11.147	11.1734	10.7676
C12orf77	-0.590751	14.8623	7.87657	8.51746	11.4317	12.2217
C14orf105	2.00717	0.294406	0.00555012	0.000606951	0.00147153	0
C14orf119	-0.144562	2.86985	14.1728	14.2787	15.3785	14.7532
C14orf132	3.53924	1.49606	0.00554042	0.00671139	0	0.00100499
C14orf159	0.320617	11.711	1.83443	1.90997	1.48611	1.38661
C14orf166	-0.140863	10.3814	146.305	143.639	152.591	153.66
C14orf178	-0.0322757	0.016217	0.515993	0.499916	0.615634	0.380239
C14orf2	-0.223707	13.351	49.0006	50.2038	56.1297	54.8573
C14orf28	-0.0691138	0.114982	1.35501	1.37542	1.36763	1.37655
C14orf37	-0.326661	0.0439404	0.00364921	0.0107749	0.0130617	0.00430261
C14orf39	-0.553978	0.154916	0.0336505	0.0294396	0.0490706	0.0396757
C14orf79	-0.228484	0.325546	0.854831	0.744884	0.902973	0.892336
C14orf80	-0.0126299	0.0741869	8.71785	8.78083	8.50414	8.40771
C14orf93	0.024661	0.0740685	1.41611	1.3378	1.24291	1.35026
C15orf39	0.371569	18.531	10.7344	11.0102	8.063	8.03913
C15orf40	0.00215662	0.00672202	3.55098	3.54993	3.50896	3.28428
C15orf41	-0.0109383	0.0286896	0.639405	0.60406	0.612344	0.587985
C15orf52	-0.198697	0.101389	0.0637119	0.0779083	0.0829256	0.0728433
C15orf54	0.267645	0.0349805	0.00676895	0.00832768	0.00201902	0.00997617
C15orf61	0.207155	1.07056	6.40374	6.72392	5.51277	5.38242
C15orf62	0.186044	0.935942	3.54209	3.66478	3.01583	3.05323
C15orf65	-0.137104	0.0851585	0.834758	0.767712	0.865338	0.822875
C16orf45	-0.1589	0.0573633	0.069721	0.0449586	0.0602371	0.0623622
C16orf46	0.579133	1.25404	0.409839	0.460589	0.235821	0.322148
C16orf52	0.100375	0.439577	2.87857	2.87183	2.52962	2.60886
C16orf54	-0.770174	16.7351	2.64301	2.69866	4.28634	4.44111
C16orf58	0.286638	9.16271	14.0865	14.6796	11.292	11.3016
C16orf59	0.111673	1.49894	24.9037	24.3422	21.4634	22.1978
C16orf62	0.123054	0.790251	7.57839	7.58221	6.35443	6.98128
C16orf70	0.00714291	0.0219268	1.56724	1.59645	1.54996	1.46623
C16orf71	0.0398567	0.024303	0.289325	0.325975	0.295233	0.278289
C16orf72	-0.0154724	0.166231	31.8644	32.3578	31.1571	31.0336
C16orf74	0.895151	3.61525	2.63194	2.23975	1.43982	1.07053
C16orf86	0.200681	0.338594	1.9391	1.81268	1.54882	1.5784
C16orf87	-0.263143	13.6437	1.19989	1.23002	1.42457	1.36934
C16orf89	1.84764	0.490197	0.0149178	0.0381742	0.00355969	0.0105533
C16orf91	-0.262383	3.5562	15.3846	16.1872	18.1045	18.1764
C16orf92	-0.0090335	0.00080958	0.0120604	0.0474805	0.0575575	0
C16orf95	-0.178915	0.80477	2.37973	2.31274	2.51014	2.57854
C17orf100	0.00982678	0.00915571	1.35132	1.40785	1.10106	1.52332
C17orf102	2.59102	0.601399	0.0205525	0.0176997	0	0.00605812
C17orf107	0.220345	0.0406812	0.0233335	0.0295269	0.0198853	0.0235812
C17orf47	-1.90739	0.362836	0.00482984	0.00950728	0.0288126	0.0227785
C17orf50	0.108996	0.0464607	0.369403	0.363575	0.297795	0.353145
C17orf51	0.0156993	0.0596202	3.59284	3.4391	3.33767	3.32589
C17orf53	0.0286581	0.105647	1.92737	2.0015	1.8357	1.85428
C17orf58	-0.309812	2.59233	3.06905	2.87162	3.32098	3.73215
C17orf62	-0.00836273	0.101347	8.43761	8.39793	8.18602	8.03682
C17orf67	0.0591452	0.125765	3.35389	3.2563	3.1531	2.92567
C17orf75	0.0477596	0.42275	10.9659	10.9475	10.0871	10.2223
C17orf77	0.796686	0.144901	0.0118242	0.0135773	0.00470251	0.00929424
C17orf78	0.25501	0.257211	0.320732	0.310034	0.300667	0.205962
C17orf80	-0.137711	4.14314	2.58861	2.61285	2.70182	2.7802
C17orf97	0.466863	0.143818	0.106154	0.0659868	0.0599935	0.0592868
C17orf98	0.384275	0.0633268	0.145839	0.0897112	0.0652505	0.10747
C17orf99	-1.8259	0.606719	0.0189187	0.0372405	0.124146	0.0669185
C18orf21	-0.130523	1.3811	5.93137	6.19971	6.42167	6.30148
C18orf25	-0.173667	9.80713	8.53723	8.49567	9.14695	9.25782
C18orf32	0.205841	0.18902	0.379642	0.334998	0.242096	0.351148
C18orf54	-0.133883	4.1014	2.59936	2.65222	2.74552	2.77486
C18orf61	-0.0643298	0.0682521	0.693576	0.742317	0.718985	0.719452
C18orf63	2.38175	0.506476	0.0142237	0.0119994	0.00242434	0.00239578
C18orf65	-0.217179	0.333574	0.871375	0.784534	0.933316	0.910647
C18orf8	0.0647238	0.819388	6.07153	6.11766	5.46903	5.69555
C19orf12	0.0363947	0.162224	0.779696	0.766758	0.716594	0.727972
C19orf24	0.0101964	0.039403	33.9314	34.9022	33.4688	32.0164
C19orf25	-0.0258924	0.162487	20.6543	21.1306	20.1825	20.5729
C19orf35	0.610269	1.004	0.411976	0.381856	0.257696	0.240513
C19orf38	-0.549243	2.16993	1.69792	1.73648	2.354	2.46048
C19orf44	0.270477	1.37493	1.23423	1.19779	0.89259	1.03857
C19orf47	0.0741215	0.607989	5.13495	5.27103	4.73907	4.73106
C19orf48	0.00574137	0.0619886	11.393	11.2956	10.7914	10.858
C19orf53	-0.0668588	0.873168	62.1582	61.0549	61.9836	61.6542
C19orf54	0.245039	1.62301	3.53073	3.60741	3.01342	2.75766
C19orf57	-1.1276	0.51951	0.00536579	0.00528113	0.0128039	0.00948982
C19orf60	0.0598052	0.572173	27.6149	28.205	25.3415	25.9627
C19orf66	0.0114822	0.0283136	3.17854	3.05286	3.00079	2.92166
C19orf67	0.155121	0.0740986	0.284897	0.294422	0.254934	0.243534
C19orf68	0.207575	0.834523	1.97021	1.78411	1.54434	1.57004
C19orf70	-0.0394332	0.223208	17.5841	17.5649	17.9169	16.6928
C19orf71	0.212892	1.12942	13.4794	15.5081	12.0985	11.8652
C19orf73	0.233133	0.169871	0.856436	0.992474	0.741643	0.76548
C19orf84	0.995789	0.140416	0.0148691	0.0219518	0.0177405	0
C1D	-0.166115	3.35777	7.3845	7.21066	7.82273	7.86547
C1GALT1	-0.044786	0.431318	10.0658	9.68822	9.89372	9.62768
C1GALT1C1	-0.308097	5.77607	4.76566	4.81288	5.63198	5.72894
C1orf100	-0.539714	0.0714919	0.0285293	0.0140396	0.0340385	0.0252281
C1orf109	0.0360861	0.325167	1.19729	1.19216	1.11073	1.12181
C1orf112	-0.0853378	1.57897	5.93112	6.05443	6.01135	6.17051
C1orf116	1.41241	0.70226	0.00949349	0.0280311	0.00679605	0.00671599
C1orf122	0.207464	2.67555	9.24817	9.98012	7.8023	8.1514
C1orf123	-0.0801888	0.62759	8.76718	8.14978	8.49354	8.63805
C1orf131	-0.0675711	0.531771	12.0866	12.7896	12.2581	12.7165
C1orf132	-0.396671	2.52875	1.02729	1.04158	1.31099	1.29835
C1orf141	-1.31589	0.24924	0.00612833	0.00150791	0.0109676	0.00722561
C1orf143	0.093921	0.0112401	0.054018	0.0531657	0.0644492	0.031845
C1orf146	-0.291724	0.125863	0.289304	0.42033	0.295861	0.536022
C1orf159	-0.0620145	0.231758	3.2553	3.04775	3.25707	3.04677
C1orf162	0.310795	0.218949	0.205056	0.191382	0.164509	0.141728
C1orf167	1.39488	2.63253	0.16109	0.147689	0.0447583	0.0676475
C1orf174	0.110006	1.39383	24.7816	23.479	21.2488	21.5883
C1orf186	-0.197284	0.929603	4.07691	4.29267	4.57632	4.61724
C1orf189	0.329865	0.117764	0.248899	0.389073	0.279494	0.207151
C1orf194	0.699632	1.19498	1.20164	1.69749	0.910811	0.800073
C1orf198	0.157162	0.234738	0.224504	0.202775	0.179673	0.187361
C1orf21	1.40015	0.633598	0.0129513	0.0196107	0.00713183	0.00469854
C1orf216	0.0885441	0.316687	1.88363	2.02309	1.73786	1.78215
C1orf220	0.0293979	0.0682521	3.8119	3.83024	3.51566	3.6576
C1orf226	1.05728	0.334889	0.0281465	0.0237449	0.0191896	0.00474088
C1orf228	-0.346152	0.414558	0.484644	0.501149	0.60019	0.600353
C1orf229	0.494365	0.0850494	0.0454737	0.0179025	0.010851	0.0321695
C1orf27	0.000606439	0.0018503	2.52854	2.7288	2.43777	2.59663
C1orf35	-0.0242878	0.106884	9.97841	10.6959	9.97439	10.1689
C1orf43	-0.101165	7.33787	13.7701	13.7793	14.1073	14.2024
C1orf50	-0.0554496	0.182538	6.45976	6.35783	6.33801	6.42216
C1orf52	-0.115103	1.62929	5.85289	5.93078	5.95132	6.27451
C1orf53	-0.172777	0.29787	3.33561	3.9069	3.85368	3.96845
C1orf54	-0.346524	0.839774	0.683704	0.808273	0.937622	0.880248
C1orf56	-0.0926366	0.10431	1.19391	1.36748	1.34116	1.27597
C1orf61	1.51343	0.534439	0.0099173	0.0146412	0.0059162	0.0023386
C1orf74	-0.00870956	0.0275518	4.4264	4.33575	4.14066	4.30383
C1orf87	-0.0957977	0.0112221	0.0203639	0.015032	0.0182222	0.0180076
C1orf94	4.70448	1.05746	0.00801047	0.0157682	0	0
C1QBP	-0.121083	5.98794	98.8552	99.1028	102.747	103.503
C1QL3	-0.489189	3.40413	1.87881	1.57747	2.27603	2.37067
C1QL4	0.228813	0.0663853	0.0596999	0.141999	0.0474856	0.117316
C1QTNF12	0.924583	0.643162	0.257825	0.370876	0.130144	0.18707
C1QTNF3	0.154224	0.563127	0.61923	0.656142	0.551224	0.546802
C1QTNF3-AMACR	0.0425837	0.0112401	0.0484258	0.053269	0.0475811	0.0470206
C1QTNF4	1.61726	0.537239	0.0581497	0.10731	0.0173447	0.0342807
C1QTNF6	0.743707	0.192042	0.0291256	0.026461	0.00267307	0.0290574
C1QTNF7	1.6312	1.28174	0.0177195	0.0265389	0.00367673	0.0099919
C1QTNF9	-1.3169	0.337895	0.00736653	0.00543772	0.0109863	0.0195424
C1QTNF9B	3.13752	0.536727	0.0245419	0.0289856	0.00585622	0
C1R	1.36913	0.230844	0.00909474	0.0492318	0.021702	0
C1RL	0.0262058	0.0298621	0.244678	0.23806	0.228416	0.225726
C1RL-AS1	0.131025	0.712006	2.60683	2.48312	2.25119	2.20166
C1S	0.0706131	0.0237	0.0327623	0.035966	0.0210479	0.0415998
C2	0.513494	0.456217	0.00588035	0.00599427	0.00375851	0.00420947
C20orf144	0.125207	0.0978135	1.93342	1.72508	1.37976	1.83221
C20orf173	-0.428148	0.189297	0.0681631	0.054309	0.0774532	0.0803678
C20orf194	0.153954	0.293851	0.575002	0.513012	0.422315	0.514191
C20orf196	-0.0957419	0.542002	3.55017	3.53649	3.40612	3.84776
C20orf202	1.25864	0.218356	0.0128133	0.0630554	0.0152876	0.0151075
C20orf203	1.11808	1.80849	0.114776	0.166475	0.0576591	0.0664765
C20orf204	0.0274199	0.0267821	0.844361	0.732376	0.79121	0.690972
C20orf24	0.0935058	0.591826	4.61611	4.67724	4.09554	4.24858
C20orf27	0.123552	4.3534	15.6047	15.2969	13.6129	13.5612
C20orf96	0.164513	0.417026	1.54756	1.42181	1.32434	1.2139
C21orf140	0.0230474	0.0107107	0.50248	0.452462	0.446445	0.453791
C21orf2	0.103843	1.14089	3.80761	3.76738	3.30392	3.44859
C21orf33	0.0394155	0.50474	13.4298	13.5731	12.7791	12.3943
C21orf58	0.107568	3.75676	8.32369	8.2668	7.44427	7.30802
C21orf59	0.00548824	0.02079	2.86817	2.80016	2.65772	2.75163
C21orf59-TCP10L	0.428242	0.169337	0.0140471	0.00938157	0.0107741	0.00591509
C21orf62	0.532875	0.539733	0.0524896	0.0566609	0.033333	0.0389295
C21orf62-AS1	-0.12867	0.10916	0.400376	0.457617	0.467419	0.431457
C21orf91	-0.258398	12.2366	3.39182	3.3956	3.80671	3.97078
C21orf91-OT1	-0.395688	0.218356	0.311687	0.306769	0.464845	0.314996
C22orf15	0.155236	0.179704	0.932498	0.958705	0.772421	0.85436
C22orf23	0.0377815	0.0463747	0.861667	1.12269	0.887722	0.964347
C22orf24	0.0636537	0.0496984	0.238279	0.223079	0.231132	0.191863
C22orf31	4.00524	1.08175	0.115427	0.0757374	0	0.0113412
C22orf34	-0.0799163	0.361744	2.81515	2.63964	2.8047	2.71861
C22orf39	-0.00528295	0.0236432	12.2373	12.5586	11.789	12.0529
C22orf46	-0.112981	0.38697	1.58089	1.62501	1.65471	1.66685
C2CD2	0.0575591	0.244252	1.47042	1.46632	1.33364	1.36965
C2CD2L	-0.0357125	0.180296	4.25649	4.19983	4.13692	4.16722
C2CD3	0.0821782	1.39382	4.63196	4.72841	4.17331	4.29738
C2CD4C	1.8655	0.211531	0.0525992	0.00647116	0	0.0155043
C2CD5	0.0680771	1.18352	2.86571	2.83955	2.57699	2.63661
C2CD6	1.26709	0.60758	0.0168463	0.0118432	0.0057427	0.00567505
C2orf15	-0.0203204	0.0333466	1.73633	1.73159	1.62042	1.74867
C2orf16	0.27021	0.560968	0.412192	0.381249	0.317984	0.312286
C2orf27A	-0.0748802	0.0931535	2.44126	2.12838	2.58009	2.03179
C2orf42	-0.0827569	0.499134	0.545052	0.570522	0.557218	0.574623
C2orf48	0.286067	1.01999	2.43337	2.21935	1.77422	1.88083
C2orf49	-0.0410429	0.286926	5.24559	5.54191	5.42483	5.20908
C2orf54	-0.725946	0.103163	0.00790832	0.00155671	0.00377419	0.0111892
C2orf68	0.0191261	0.161574	21.117	20.881	19.5046	20.1978
C2orf69	-0.0545945	0.412816	9.67945	9.6406	9.56688	9.65555
C2orf71	1.9967	0.314741	0.00582817	0.00860433	0.00347682	0
C2orf73	-0.571315	0.0616283	0.0267834	0	0.0127822	0.0252633
C2orf74	-0.0932061	0.265877	3.10466	2.84671	3.02071	3.0607
C2orf76	-0.237883	1.98109	2.16312	2.22314	2.44336	2.51198
C2orf78	1.90073	0.394181	0.0269912	0.019924	0.0120763	0
C2orf81	0.227654	0.74966	0.581503	0.567499	0.487413	0.452742
C2orf82	-0.301195	0.172365	0.0168816	0.0267031	0.0237383	0.0277238
C2orf88	-0.555241	69.2598	3.42028	3.45544	4.85615	4.82318
C2orf91	1.99645	0.458964	0.0110448	0.0298941	0.00658883	0.00325561
C3	2.06152	0.821611	0.0342719	0.0178577	0.00721588	0.00475392
C3AR1	1.56086	0.480025	0.0153673	0.0056718	0.00229185	0.0045297
C3orf14	0.0273479	0.021608	0.125798	0.141501	0.12752	0.123788
C3orf18	-0.216969	0.177639	0.0762588	0.0720534	0.0703616	0.0947084
C3orf20	-0.21943	2.99522	2.00974	2.0686	2.29482	2.25439
C3orf30	1.67929	0.320246	0.0340036	0.0334671	0.0135233	0.006682
C3orf33	0.578519	0.42126	0.160792	0.0911976	0.0780373	0.0835445
C3orf35	-0.155735	0.114831	0.0550125	0.0698386	0.0580258	0.075203
C3orf38	-0.172954	4.34355	15.9714	16.1808	17.4987	17.2281
C3orf49	0.167651	0.205963	1.36098	1.30011	1.17487	1.09495
C3orf52	0.0178639	0.0818445	8.38741	8.31584	7.7263	8.07766
C3orf58	0.00508006	0.0423816	16.3937	16.6003	15.6851	15.8126
C3orf62	0.0607505	0.163869	2.64382	2.52889	2.3726	2.37839
C3orf67	1.82814	0.866373	0.00783953	0.0072336	0.00175376	0.0023108
C3orf67-AS1	0.490088	0.0496984	0.0279911	0.00459158	0.0222643	0
C3orf70	0.929005	0.388127	0.0278377	0.0376729	0.00830334	0.0246166
C3orf79	1.22892	1.83842	0.87159	1.29551	0.424449	0.461394
C3orf80	1.42814	0.207568	0.0318616	0.00783972	0	0.0140874
C3P1	1.35495	0.311802	0.0192456	0.024354	0.0131212	0.00324165
C4orf17	0.489244	0.0557908	0.0252327	0.018626	0.0150527	0.0148754
C4orf19	0.311014	0.501293	0.241608	0.214156	0.177005	0.17492
C4orf22	-0.839489	3.36258	0.673747	0.607857	0.991418	1.20481
C4orf26	1.21201	0.446471	0.00990783	0.02167	0.00788073	0.00519193
C4orf3	-0.314139	16.0888	7.72325	7.90823	9.35626	9.26275
C4orf32	-0.020997	0.16599	25.7264	25.7024	25.0436	24.9485
C4orf33	-0.204636	1.81105	3.77937	3.69036	4.16726	4.07946
C4orf36	-0.106837	0.0177718	0.125025	0.0447463	0.054243	0.120609
C4orf46	-0.0177987	0.149789	8.70257	8.84979	8.38911	8.63468
C4orf47	-0.248015	0.234401	0.474609	0.35034	0.483679	0.454666
C4orf48	0.0686818	0.190748	10.5008	9.95686	9.10309	9.58226
C5	-0.291056	5.21742	1.27411	1.24542	1.46896	1.48423
C5AR1	-1.57719	0.361973	0.0175518	0.00431872	0.0261765	0.0362153
C5AR2	-0.657351	0.338967	0.054005	0.0386567	0.0995795	0.0405203
C5orf15	-0.124283	2.92658	24.4376	25.063	26.0442	25.6471
C5orf22	-0.0271218	0.135592	5.34632	5.09414	4.98618	5.20475
C5orf24	-0.0247584	0.166231	4.45725	4.34272	4.19459	4.38114
C5orf30	0.0432781	0.239122	3.52743	3.70554	3.26796	3.45635
C5orf34	-0.00191892	0.00764044	13.7456	13.8374	13.0763	13.3832
C5orf42	0.341623	0.366536	0.0893111	0.0869958	0.0768973	0.0564508
C5orf47	-1.25443	0.442635	0.0407764	0.0080266	0.0729759	0.038462
C5orf51	-0.0214894	0.166442	12.89	12.9642	12.659	12.4821
C5orf56	-0.383453	1.69714	4.27963	4.07338	4.89202	5.54445
C5orf63	0.154852	0.474031	1.01149	0.972701	0.789784	0.917247
C5orf66	-0.159881	0.810372	4.15444	3.81466	4.37121	4.15791
C5orf66-AS1	-0.0460124	0.0142747	0.110162	0.168659	0.146039	0.129887
C5orf66-AS2	1.06931	0.5661	0.138051	0.0843352	0.0283983	0.0729658
C5orf67	3.1414	0.535603	0.0770857	0.043354	0.0131388	0
C6	1.07144	0.303602	0.0124238	0.0163037	0.00658795	0.00651034
C6orf10	-0.132438	0.0496984	0.00672869	0.00709556	0.00458745	0.00991684
C6orf106	-0.100832	6.73708	23.8475	24.1754	25.0328	24.3071
C6orf120	-0.0605493	0.877858	8.5066	8.31606	8.46442	8.3427
C6orf132	2.4853	1.3851	0.0213282	0.0314875	0.00545288	0.00359243
C6orf136	0.0693221	0.236754	0.410881	0.396258	0.382075	0.354951
C6orf163	-0.308293	0.291384	0.537269	0.505463	0.603312	0.633468
C6orf201	0.363981	0.399592	0.132748	0.136334	0.113622	0.0867645
C6orf203	0.0376092	0.138435	4.00705	3.88768	3.72047	3.64818
C6orf222	2.25988	0.603843	0.0192973	0.0298459	0.00986732	0
C6orf223	0.715465	48.9958	2.47337	2.50225	1.43237	1.47051
C6orf226	-0.122224	0.186524	4.95475	4.47325	4.71146	5.11716
C6orf229	0.604432	0.217589	0.288228	0.160341	0.164467	0.118204
C6orf47	0.177061	2.07259	1.27819	1.29885	1.10434	1.07946
C6orf48	-0.109004	4.49847	3.46252	3.47182	3.54411	3.62028
C6orf52	-0.16812	0.114942	0.420402	0.369634	0.327702	0.522112
C6orf62	-0.0570022	1.57838	54.7826	55.2408	54.7293	54.9234
C6orf89	0.151035	5.58212	3.38877	3.23604	2.84391	2.87164
C6orf99	-0.123653	0.161893	0.65489	0.825307	0.781354	0.763979
C7	1.15517	0.386773	0.0241899	0.0187064	0.0103075	0.00814889
C7orf13	0.765034	1.96539	0.578663	0.666662	0.321119	0.380804
C7orf25	0.0203875	0.0496984	3.20785	3.44577	3.13112	3.15406
C7orf26	-0.141666	2.58222	9.56179	9.85966	10.1299	10.3958
C7orf31	-0.233585	0.375883	0.484796	0.496794	0.50356	0.601861
C7orf43	0.108896	1.67841	10.6234	10.1851	9.28405	9.20105
C7orf49	0.106199	3.03416	5.38375	5.48803	4.8469	4.82953
C7orf50	0.161235	13.1819	8.74802	8.78079	7.61167	7.4062
C7orf61	0.802248	0.505637	0.287089	0.333016	0.207963	0.132979
C7orf71	0.751275	0.336257	0.0632568	0.0684846	0.0301888	0.0447498
C7orf72	-0.228771	0.439986	1.55239	1.78858	1.72927	2.02119
C7orf73	0.0576723	0.666493	26.3229	25.9723	23.4453	24.6872
C8G	0.173304	0.114097	0.849386	0.731486	0.619305	0.723284
C8orf33	-0.0247568	0.210321	31.7294	30.463	30.7165	29.896
C8orf34	1.16602	0.43062	0.00369966	0.00420148	0.00135818	0.00201327
C8orf37	-0.0182477	0.0496984	4.42604	4.73722	4.56427	4.32721
C8orf37-AS1	-0.316707	0.0855386	0.0377118	0.0314065	0.0242277	0.0581455
C8orf44	0.230757	0.775376	2.55767	2.59246	2.1797	2.02542
C8orf44-SGK3	0.781298	0.158336	0.0180694	0.0155613	0.00808452	0.0106524
C8orf46	0.456011	0.251179	0.0801134	0.131416	0.0708028	0.0769656
C8orf58	-0.312042	1.37397	0.655075	0.654788	0.771424	0.786411
C8orf59	-0.0696765	0.520959	5.76995	5.73354	5.70173	5.86359
C8orf76	-0.214279	0.582368	2.71182	2.50269	2.92385	2.87129
C8orf82	0.041093	0.203948	14.0038	14.6835	13.4197	13.293
C8orf88	-0.116162	0.189809	2.72515	3.30927	3.18122	3.08595
C9	-0.457682	0.281831	0.112865	0.100334	0.108597	0.171708
C9orf116	-0.187263	0.0743626	0.169582	0.246732	0.158345	0.295573
C9orf129	0.188388	0.143675	0.768193	0.668157	0.554185	0.652975
C9orf131	0.262848	0.253698	0.0757794	0.0554755	0.0590299	0.0457816
C9orf139	1.99679	0.568238	0.0215392	0.031799	0.0128493	0
C9orf147	0.301844	0.548897	0.648591	0.792686	0.59526	0.525221
C9orf152	0.586447	0.478604	0.16242	0.239786	0.101506	0.155025
[truncated: 17,947 more rows]

## Sheet: EBNA2 DEGs
Gene	This study	Wang et al.
ADPRH	up	up
AK4	up	up
ANXA2	up	up
ANXA6	up	up
APBB3	up	down
APOBEC3G	up	up
BATF	up	up
BATF3	up	up
BCL3	up	down
BMPR2	up	up
BSPRY	up	up
CCR10	up	up
CD58	up	up
CD82	up	up
CDKN1B	up	down
CEP19	up	up
CHI3L2	up	up
CHST12	up	up
CLEC2B	up	down
COL9A2	up	up
CREBL2	up	up
CTH	up	up
CYSTM1	up	up
DDX58	up	up
EIF2AK2	up	up
FOXO3	up	down
FUT8	up	up
GABRR2	up	up
GFI1	up	up
GIMAP6	up	up
GRK5	up	down
GUCY1B3	up	up
HBEGF	up	up
HCST	up	up
IFI27L2	up	up
IFITM1	up	up
IFITM2	up	up
LGALS3BP	up	up
LIMD1	up	up
LMO2	up	up
LNP1	up	up
LTB	up	down
LY9	up	down
LYSMD2	up	up
MAP3K8	up	down
MEI1	up	up
MELTF	up	up
MIR3142HG	up	up
MLLT11	up	down
MREG	up	up
MT1X	up	up
MX2	up	up
MXI1	up	down
NEK6	up	up
NETO2	up	up
NUCB2	up	up
OTUD1	up	down
P2RX5	up	down
P2RY10	up	down
PARVG	up	down
PEPD	up	up
PLGRKT	up	up
RELB	up	down
RGS10	up	up
S100A4	up	up
S100A6	up	down
SH3PXD2A	up	up
SLA2	up	up
SLAMF1	up	up
SLC35A4	up	up
SYNE3	up	down
TNFRSF13B	up	up
TOX	up	up
WNT10A	up	up
ZNRF1	up	up
ADGRL1	up	not differential
AFF1-AS1	up	not differential
AGMAT	up	not differential
AIM2	up	not differential
ANK2	up	not differential
ANXA2R	up	not differential
APOBEC3D	up	not differential
APOBEC3F	up	not differential
ATP2B4	up	not differential
ATP6V0A1	up	not differential
ATP6V1B1-AS1	up	not differential
B3GNT7	up	not differential
B4GALNT1	up	not differential
BCL2A1	up	not differential
BST1	up	not differential
C15ORF65	up	not differential
C16ORF54	up	not differential
C18ORF61	up	not differential
C1ORF54	up	not differential
C2ORF27A	up	not differential
C7orf72	up	not differential
C8G	up	not differential
C8ORF88	up	not differential
CAND1.11	up	not differential
CARD16	up	not differential
CARD6	up	not differential
CBLN3	up	not differential
CCDC144A	up	not differential
CD80	up	not differential
CD84	up	not differential
CENPV	up	not differential
CES3	up	not differential
COL5A1	up	not differential
COPZ2	up	not differential
CPEB4	up	not differential
CTSD	up	not differential
DAB2IP	up	not differential
DECR2	up	not differential
DGAT2	up	not differential
DLGAP4-AS1	up	not differential
DMXL2	up	not differential
DNAJC15	up	not differential
DTX4	up	not differential
DUSP10	up	not differential
DUSP16	up	not differential
DYRK3	up	not differential
EGLN3	up	not differential
ELL2	up	not differential
ENO2	up	not differential
ERN1	up	not differential
EVC2	up	not differential
F12	up	not differential
FAM167A-AS1	up	not differential
FAM198B	up	not differential
FAM27C	up	not differential
FBXO4	up	not differential
FGR	up	not differential
FIRRE	up	not differential
FLJ32255	up	not differential
FNDC10	up	not differential
FOCAD	up	not differential
FRY	up	not differential
FUT8-AS1	up	not differential
GGACT	up	not differential
GIMAP2	up	not differential
GNB4	up	not differential
GPD2	up	not differential
GSTO2	up	not differential
GYPC	up	not differential
HEATR6	up	not differential
HIST1H1D	up	not differential
HLA-DQA1	up	not differential
HVCN1	up	not differential
IL1B	up	not differential
IL2RG	up	not differential
IQGAP2	up	not differential
ITGA3	up	not differential
JAG2	up	not differential
KHK	up	not differential
KREMEN2	up	not differential
LBH	up	not differential
LDLRAD4	up	not differential
LILRB1	up	not differential
LINC00239	up	not differential
LINC00324	up	not differential
LINC00337	up	not differential
LINC00884	up	not differential
LINC00926	up	not differential
LINC00959	up	not differential
LINC01644	up	not differential
LINC01887	up	not differential
LINC02363	up	not differential
LINC02446	up	not differential
LMCD1	up	not differential
LOC100129034	up	not differential
LOC100130476	up	not differential
LOC100506098	up	not differential
LOC105377372	up	not differential
LOC155060	up	not differential
LOC728739	up	not differential
LRP11	up	not differential
LZTS1-AS1	up	not differential
MAG	up	not differential
MAP1A	up	not differential
MAP1B	up	not differential
MAPK11	up	not differential
MCTP1	up	not differential
MEGF11	up	not differential
MIR1324	up	not differential
MIR215	up	not differential
MIR4496	up	not differential
MIR5087	up	not differential
MSR1	up	not differential
NAALADL2-AS2	up	not differential
NAPSA	up	not differential
NECAB1	up	not differential
NECTIN1	up	not differential
NEUROG2	up	not differential
NKAPP1	up	not differential
NRN1	up	not differential
OPTN	up	not differential
PARP14	up	not differential
PARP3	up	not differential
PCED1B	up	not differential
PCED1B-AS1	up	not differential
PELI2	up	not differential
PIEZO2	up	not differential
PLCB1	up	not differential
PLEK	up	not differential
PLEKHG4	up	not differential
POF1B	up	not differential
PPM1J	up	not differential
PRAMENP	up	not differential
PROCR	up	not differential
RARRES3	up	not differential
RASGRP1	up	not differential
RHPN1	up	not differential
RNU4ATAC	up	not differential
S100A13	up	not differential
SARDH	up	not differential
SCMH1	up	not differential
SELL	up	not differential
SLC27A5	up	not differential
SLC2A3	up	not differential
SLC9A9	up	not differential
SMARCD3	up	not differential
SNORD116-20	up	not differential
SOGA1	up	not differential
SPNS3	up	not differential
SRD5A3	up	not differential
STX11	up	not differential
TBC1D27	up	not differential
TCTN1	up	not differential
TIMD4	up	not differential
TLR3	up	not differential
TMEM191B	up	not differential
TNFAIP3	up	not differential
TNFSF9	up	not differential
TNNT3	up	not differential
TPST1	up	not differential
TRIM42	up	not differential
TUBB2A	up	not differential
UBE2Q2P1	up	not differential
UNC119	up	not differential
VPS37B	up	not differential
WDR63	up	not differential
ZNF680	up	not differential
ZNF826P	up	not differential
ALKBH3	down	up
ARHGAP24	down	down
ATP1B1	down	up
CBR1	down	up
CD1D	down	down
CD86	down	up
CHPT1	down	down
CXCR5	down	down
CYP2U1	down	down
DDB2	down	up
ECHDC1	down	up
FAM84B	down	down
HLA-DOB	down	down
IDH2	down	up
IRF5	down	up
KCNN4	down	down
LXN	down	up
MAP3K20	down	up
MAP4K4	down	down
MED13L	down	down
MOXD1	down	up
MSH6	down	up
PCED1A	down	down
PYCARD	down	up
RCN1	down	up
RFK	down	down
SCIMP	down	up
SLC25A24	down	down
SLC30A4	down	down
SNN	down	down
SOX4	down	up
TEX9	down	up
TOR4A	down	up
TSPAN13	down	down
TST	down	up
VNN2	down	up
ACY3	down	not differential
AGO4	down	not differential
ALOX15P1	down	not differential
APOL5	down	not differential
ARHGEF3	down	not differential
ASPH	down	not differential
B3GLCT	down	not differential
B4GALT6	down	not differential
BCAR3	down	not differential
BIRC6-AS2	down	not differential
BMP6	down	not differential
BTBD6	down	not differential
BTLA	down	not differential
C17ORF51	down	not differential
C17ORF58	down	not differential
C2ORF88	down	not differential
CAB39L	down	not differential
CERNA2	down	not differential
CGN	down	not differential
CHST4	down	not differential
CRIM1	down	not differential
CYB5A	down	not differential
DENND5B	down	not differential
DENND5B-AS1	down	not differential
DGKI	down	not differential
ECE1	down	not differential
EEPD1	down	not differential
EHMT1-IT1	down	not differential
EML6	down	not differential
ENGASE	down	not differential
EPS8L2	down	not differential
FAXDC2	down	not differential
FBXW4P1	down	not differential
FGD6	down	not differential
FSD1	down	not differential
FZD3	down	not differential
GAS2L3	down	not differential
GCNT1	down	not differential
GJC1	down	not differential
GLS2	down	not differential
GPR22	down	not differential
GSDMA	down	not differential
GTF3C3	down	not differential
HELQ	down	not differential
HIST1H4L	down	not differential
HMX2	down	not differential
HSPG2	down	not differential
HTATSF1P2	down	not differential
IFIT5	down	not differential
IGSF6	down	not differential
ITGB1	down	not differential
IVD	down	not differential
JAZF1	down	not differential
KBTBD8	down	not differential
KDF1	down	not differential
KHDRBS3	down	not differential
KLHL6-AS1	down	not differential
LINC01484	down	not differential
LINGO3	down	not differential
LLGL1	down	not differential
LOC100130872	down	not differential
LOC100505622	down	not differential
LOC100506985	down	not differential
LOC101927730	down	not differential
LOC101928551	down	not differential
LOC654342	down	not differential
LOC729652	down	not differential
LRFN4	down	not differential
LZTS1	down	not differential
MAPK13	down	not differential
MCF2L2	down	not differential
METRNL	down	not differential
MIR302C	down	not differential
MIR4451	down	not differential
MIR4459	down	not differential
MIR4539	down	not differential
MIR5194	down	not differential
MIR920	down	not differential
MPP7	down	not differential
MPST	down	not differential
MRI1	down	not differential
NR5A2	down	not differential
NT5C3B	down	not differential
NTN3	down	not differential
NUP62CL	down	not differential
OR7E47P	down	not differential
PACS2	down	not differential
PEG10	down	not differential
PIGH	down	not differential
PNMA8A	down	not differential
PPP1R26	down	not differential
PRKCQ	down	not differential
PSMD5-AS1	down	not differential
PYCARD-AS1	down	not differential
RPS6KA2-IT1	down	not differential
SCD5	down	not differential
SDR42E1	down	not differential
SFMBT1	down	not differential
SGCB	down	not differential
SH3BP2	down	not differential
SLC15A2	down	not differential
SLC22A5	down	not differential
SLC25A15	down	not differential
SLC25A29	down	not differential
SLC27A2	down	not differential
SLCO4A1-AS1	down	not differential
SMAD6	down	not differential
SMIM18	down	not differential
SNORA104	down	not differential
SNORA90	down	not differential
SNORD7	down	not differential
SPTBN1	down	not differential
STK32C	down	not differential
STXBP6	down	not differential
SUGT1P3	down	not differential
SYP	down	not differential
TBC1D4	down	not differential
TBKBP1	down	not differential
TBX10	down	not differential
TDRKH	down	not differential
TESC	down	not differential
TM6SF1	down	not differential
TMEM14EP	down	not differential
TNRC6C-AS1	down	not differential
TTC39C-AS1	down	not differential
UBE2D4	down	not differential
URGCP	down	not differential
VAV3	down	not differential
VILL	down	not differential
XKRX	down	not differential
ZBTB7B	down	not differential
ZDHHC8	down	not differential
ZMIZ1	down	not differential
ZNF165	down	not differential
ZNF529-AS1	down	not differential
ZNF550	down	not differential
ZNF585B	down	not differential
ZNF594	down	not differential
ZNF726	down	not differential
ZNF878	down	not differential
ZRANB2-AS1	down	not differential
ZSCAN12P1	down	not differential

## Sheet: Non-EBNA2 EBV DEGs
Gene	This study	Wang et al.
ANXA5	up	up
ATF5	up	up
BCL2	up	up
BHLHA15	up	up
DFNA5	up	up
LMO4	up	up
MX1	up	up
RAPGEF2	up	up
TNFAIP2	up	up
TSC22D3	up	down
C16orf74	up	down
C6orf223	up	up
ADM	up	not differential
ANXA2P2	up	not differential
ARRDC3	up	not differential
BIN2	up	not differential
CLGN	up	not differential
CNBD1	up	not differential
CTTNBP2NL	up	not differential
CUX2	up	not differential
DDIT4	up	not differential
DNAJC12	up	not differential
FAM3B	up	not differential
FLJ20021	up	not differential
IL7R	up	not differential
INHBE	up	not differential
ISL2	up	not differential
KIF21B	up	not differential
LHFP	up	not differential
LINC01399	up	not differential
LINC01678	up	not differential
LINC02006	up	not differential
LOC101929054	up	not differential
LRRC14B	up	not differential
MAFG-AS1	up	not differential
PECR	up	not differential
PPM1M	up	not differential
PREX1	up	not differential
PRKCB	up	not differential
RIMS3	up	not differential
ROCK1P1	up	not differential
SLC38A2	up	not differential
SNTB1	up	not differential
STC2	up	not differential
TFAP2A-AS1	up	not differential
TNFRSF21	up	not differential
VLDLR-AS1	up	not differential
ASAP3	down	not differential
CLDN23	down	not differential
CLEC17A	down	up
EFNB1	down	down
EML5	down	not differential
ID1	down	not differential
JUP	down	not differential
KMO	down	not differential
LINC02095	down	not differential
LOC101927793	down	not differential
LOC105376805	down	not differential
LOC728392	down	not differential
LPP-AS1	down	not differential
MIR3193	down	not differential
PIP5K1B	down	not differential
RASL10B	down	not differential
RPP25	down	up
SETBP1	down	down
SMAD7	down	not differential
SMO	down	not differential
SPOCK2	down	not differential
SPSB1	down	not differential
TCP11L2	down	not differential
USP40	down	not differential
ZNF483	down	not differential
