# Supplementary material for: Epstein-Barr virus nuclear antigen 2 (EBNA2) extensively rewires the human chromatin landscape at autoimmune risk loci
Source: bioRxiv preprint, doi:10.1101/2020.04.15.043612, version 2 (2021-01-27)
Supplement: Supplemental Table S7 [file 043612_file19.xlsx]

## Sheet: README
Epstein-Barr virus nuclear antigen 2 (EBNA2) extensively rewires the human chromatin landscape at autoimmune risk loci
This document contains full analysis results of ATAC-seq peaks of EBNA2+, EBNA2- and uninfected conditions
Comments, additions, or subtractions should be addressed to the corresponding authors:
Leah Kottyan (Leah.Kottyan@cchmc.org)
Matt Weirauch (Matthew.Weirauch@cchmc.org)
The third tab contains the RELI results of ATAC-seq peaks of EBNA2+ against the RELI Non TF library.
The fourth tab contains the RELI results of ATAC-seq peaks of EBNA2- against the RELI Non TF library.
The fifth tab contains the RELI results of ATAC-seq peaks of uninfected against the RELI Non TF library.
The columns in all of the tabs are identical:
Track	Data track of the library dataset.
Cell	Cells from which the library dataset was generated.
Label	Name of the library dataset.
Overlap	Overlap count (number of peaks with intersecting genomic coordinates).
Total	Total number of peaks in the input set.
Ratio	Ratio of overlap count divided by total count.
Mean	Expected mean of intersection count from 2000 permutation test.
STD	Standard deviation from 2000 permutation test.
Z-score	Z-score calculated from 2000 permutation test.
Enrichment	Enrichment from 2000 permutation test (Overlap divided by Mean)
P-val	p-value calculated from 2000 permutation test.
Corrected P-val	Adjusted p-value usin Bonferroni correction.
Null_Model	Null model used in this analysis.
Species	Species for the library dataset.

## Sheet: EBNA2+ ATAC Non TF RELI
Track	Cell	Label	Overlap	Total	Ratio	Mean	STD	Z-score	Enrichment	P-val	Corrected P-val	Null_Model	Species
DNaseClusters	CD20+	Dnase	41686	64679	0.644506	6295	1122.24	31.5361	6.62208	1.39133e-218	3.47973e-215	Null_Model_OpenChrom	human
DNaseClusters	GM12865	Dnase	47394	64679	0.732757	8013.39	1248.76	31.5358	5.91435	1.40573e-218	3.51574e-215	Null_Model_OpenChrom	human
DNaseClusters	GM12864	Dnase	45600	64679	0.70502	7676.14	1202.71	31.532	5.94048	1.58219e-218	3.95706e-215	Null_Model_OpenChrom	human
DNaseI_Duke	GC_B_cell	Dnase	48172	64679	0.744786	9312.35	1232.47	31.53	5.17292	1.68621e-218	4.21721e-215	Null_Model_OpenChrom	human
DNaseClusters	GM18507	Dnase	41647	64679	0.643903	7046.6	1097.71	31.5204	5.91023	2.28176e-218	5.70667e-215	Null_Model_OpenChrom	human
DNaseClusters	GM06990	Dnase	35643	64679	0.551075	5546.46	954.837	31.5201	6.42627	2.30615e-218	5.76767e-215	Null_Model_OpenChrom	human
DNaseI_Duke	Naive_B_cell	Dnase	43911	64679	0.678907	8663.19	1118.38	31.5169	5.06869	2.5465e-218	6.36879e-215	Null_Model_OpenChrom	human
DNaseClusters	GM19239	Dnase	41787	64679	0.646068	7967.2	1073.22	31.5126	5.24488	2.92025e-218	7.30354e-215	Null_Model_OpenChrom	human
DNaseClusters	GM12878	Dnase	47264	64679	0.730747	9965.47	1183.65	31.5116	4.74278	3.01692e-218	7.54531e-215	Null_Model_OpenChrom	human
DNaseClusters	CLL	Dnase	35731	64679	0.552436	5909.31	946.403	31.5106	6.04656	3.11376e-218	7.78751e-215	Null_Model_OpenChrom	human
DNaseClusters	Jurkat	Dnase	41796	64679	0.646207	8081.11	1070.04	31.5079	5.17206	3.38348e-218	8.46207e-215	Null_Model_OpenChrom	human
DNaseClusters	GM19238	Dnase	43552	64679	0.673356	9129.43	1092.61	31.5048	4.7705	3.72887e-218	9.32591e-215	Null_Model_OpenChrom	human
DNaseClusters	CD34+_Mobilized	Dnase	43609	64679	0.674237	9473	1083.59	31.5028	4.6035	3.97964e-218	9.95308e-215	Null_Model_OpenChrom	human
DNaseI_Duke	GM18507	Dnase	42498	64679	0.65706	9090.44	1060.6	31.4986	4.67502	4.54009e-218	1.13548e-214	Null_Model_OpenChrom	human
Roadmapepigenomics_Dnase_narrow	CD3_Primary_Cells_Cord_BI	Dnase	47828	64679	0.739467	11577.4	1151.1	31.4921	4.13115	5.57024e-218	1.39312e-214	Null_Model_OpenChrom	human
DNaseClusters	NB4	Dnase	39561	64679	0.611651	8222.26	995.161	31.4911	4.81145	5.74661e-218	1.43723e-214	Null_Model_OpenChrom	human
DNaseClusters	GM19240	Dnase	44106	64679	0.681921	10417.3	1069.9	31.4878	4.23392	6.37167e-218	1.59355e-214	Null_Model_OpenChrom	human
DNaseClusters	HCT-116	Dnase	34202	64679	0.528796	6652.13	874.992	31.4859	5.14151	6.78194e-218	1.69616e-214	Null_Model_OpenChrom	human
DNaseClusters	GM12891	Dnase	40538	64679	0.626757	8963.28	1002.97	31.4811	4.52267	7.88655e-218	1.97243e-214	Null_Model_OpenChrom	human
Roadmapepigenomics_Dnase_narrow	GM12878_Lymphoblastoid	Dnase	49473	64679	0.764901	13269.2	1150.06	31.48	3.72841	8.15749e-218	2.04019e-214	Null_Model_OpenChrom	human
DNaseClusters	Th2	Dnase	31211	64679	0.482552	5446.16	818.504	31.478	5.73082	8.69624e-218	2.17493e-214	Null_Model_OpenChrom	human
DNaseClusters	CMK	Dnase	35016	64679	0.541381	7245.75	882.393	31.4715	4.83263	1.06522e-217	2.66413e-214	Null_Model_OpenChrom	human
DNaseClusters	HL-60	Dnase	37142	64679	0.574251	8441.92	911.95	31.4711	4.39971	1.0798e-217	2.70059e-214	Null_Model_OpenChrom	human
DNaseI_Duke	GM12878	Dnase	45705	64679	0.706644	11654.5	1081.97	31.4707	3.92165	1.09412e-217	2.7364e-214	Null_Model_OpenChrom	human
Roadmapepigenomics_Dnase_narrow	CD19_Primary_Cells_Peripheral_UW	Dnase	48655	64679	0.752253	13274.5	1124.25	31.4704	3.66529	1.1054e-217	2.76461e-214	Null_Model_OpenChrom	human
DNaseClusters	Monocytes-CD14+_RO01746	Dnase	36300	64679	0.561233	7637.87	910.799	31.4692	4.75264	1.14649e-217	2.86737e-214	Null_Model_OpenChrom	human
DNaseClusters	PANC-1	Dnase	32723	64679	0.505929	6803.61	823.663	31.4684	4.80965	1.17404e-217	2.93627e-214	Null_Model_OpenChrom	human
Roadmapepigenomics_Dnase_narrow	Mobilized_CD34_Primary_Cells_Male	Dnase	46971	64679	0.726217	13122.5	1075.64	31.4681	3.57943	1.18606e-217	2.96632e-214	Null_Model_OpenChrom	human
DNaseI_Duke	GM10248	Dnase	45085	64679	0.697058	12127.5	1047.34	31.4677	3.71757	1.20117e-217	3.00412e-214	Null_Model_OpenChrom	human
DNaseClusters	Urothelia	Dnase	36799	64679	0.568948	8731.27	892.212	31.4586	4.21462	1.60122e-217	4.00465e-214	Null_Model_OpenChrom	human
DNaseClusters	GM12892	Dnase	39465	64679	0.610167	9814.32	942.562	31.4575	4.02116	1.65528e-217	4.13986e-214	Null_Model_OpenChrom	human
DNaseClusters	HMVEC-dLy-Ad	Dnase	32497	64679	0.502435	7415.38	797.59	31.4467	4.38238	2.3252e-217	5.81531e-214	Null_Model_OpenChrom	human
DNaseClusters	BE2_C	Dnase	35505	64679	0.548942	9031.51	841.865	31.4462	3.93123	2.3639e-217	5.91211e-214	Null_Model_OpenChrom	human
Roadmapepigenomics_Dnase_narrow	CD56_Primary_Cells	Dnase	43228	64679	0.668347	11687	1003.02	31.446	3.69882	2.38162e-217	5.95642e-214	Null_Model_OpenChrom	human
DNaseClusters	Ishikawa+4OHTAM_100nM_30m	Dnase	33948	64679	0.524869	8247.43	817.303	31.4456	4.11619	2.41008e-217	6.02761e-214	Null_Model_OpenChrom	human
DNaseI_Duke	GM19238	Dnase	44079	64679	0.681504	12916.5	991.024	31.4448	3.41262	2.47354e-217	6.18633e-214	Null_Model_OpenChrom	human
DNaseClusters	HMVEC-dNeo	Dnase	34411	64679	0.532027	8365.27	828.345	31.4431	4.11355	2.60717e-217	6.52054e-214	Null_Model_OpenChrom	human
DNaseI_Duke	GM19240	Dnase	43401	64679	0.671022	12288.1	989.594	31.4401	3.53197	2.86435e-217	7.16375e-214	Null_Model_OpenChrom	human
DNaseClusters	HeLa-S3+IFNa4h	Dnase	29926	64679	0.462685	6794.16	735.759	31.4394	4.40467	2.92864e-217	7.32453e-214	Null_Model_OpenChrom	human
Roadmapepigenomics_Dnase_narrow	Mobilized_CD34_Primary_Cells_Female	Dnase	47490	64679	0.734241	14715.5	1042.48	31.4391	3.22721	2.95588e-217	7.39267e-214	Null_Model_OpenChrom	human
DNaseI_Duke	GM20000	Dnase	44785	64679	0.692419	13140.2	1006.62	31.4369	3.40825	3.17478e-217	7.94013e-214	Null_Model_OpenChrom	human
DNaseClusters	HMVEC-dAd	Dnase	31878	64679	0.492865	7492.02	775.818	31.4326	4.25493	3.62958e-217	9.07758e-214	Null_Model_OpenChrom	human
DNaseClusters	Ishikawa+Estradiol_100nM_1hr	Dnase	33695	64679	0.520957	8020.21	816.869	31.4307	4.20126	3.84807e-217	9.62402e-214	Null_Model_OpenChrom	human
Roadmapepigenomics_Histone_narrow	GM12878_Lymphoblastoid	H2A.Z	29042	64679	0.449017	6725.52	710.095	31.4274	4.31818	4.2678e-217	1.06738e-213	Null_Model_OpenChrom	human
Roadmapepigenomics_Dnase_narrow	CD14_Primary_Cells	Dnase	37667	64679	0.582368	10358.9	868.942	31.4268	3.63618	4.35778e-217	1.08988e-213	Null_Model_OpenChrom	human
Roadmapepigenomics_Dnase_narrow	Fetal_Thymus	Dnase	47444	64679	0.73353	15589.6	1013.64	31.4257	3.04331	4.51254e-217	1.12859e-213	Null_Model_OpenChrom	human
DNaseClusters	HMVEC-dLy-Neo	Dnase	34402	64679	0.531888	9056.14	806.578	31.4239	3.79875	4.7664e-217	1.19208e-213	Null_Model_OpenChrom	human
DNaseClusters	NT2-D1	Dnase	35988	64679	0.556409	9983.99	827.556	31.4227	3.60457	4.96121e-217	1.2408e-213	Null_Model_OpenChrom	human
DNaseClusters	HEK293T	Dnase	36832	64679	0.569458	10103.9	850.606	31.4224	3.64531	5.00747e-217	1.25237e-213	Null_Model_OpenChrom	human
DNaseI_Duke	Ishikawa+Estradiol_10nM_30m	Dnase	34731	64679	0.536975	9440.77	804.879	31.4212	3.67883	5.2022e-217	1.30107e-213	Null_Model_OpenChrom	human
DNaseI_Duke	MCF7+Randomized_shRNA_control	Dnase	36539	64679	0.564928	9945.03	846.393	31.4204	3.6741	5.33249e-217	1.33366e-213	Null_Model_OpenChrom	human
Roadmapepigenomics_Dnase_narrow	Monocytes-CD14+_RO01746	Dnase	40922	64679	0.632694	12876.3	892.615	31.4197	3.17809	5.43963e-217	1.36045e-213	Null_Model_OpenChrom	human
DNaseClusters	HPAEC	Dnase	29906	64679	0.462376	7339.11	718.243	31.4196	4.07488	5.46587e-217	1.36701e-213	Null_Model_OpenChrom	human
DNaseI_Duke	GM10266	Dnase	43209	64679	0.668053	13339.6	950.669	31.4194	3.23916	5.49695e-217	1.37479e-213	Null_Model_OpenChrom	human
DNaseClusters	HMVEC-dBl-Ad	Dnase	34386	64679	0.531641	9466.2	793.145	31.419	3.6325	5.57524e-217	1.39437e-213	Null_Model_OpenChrom	human
DNaseI_Duke	GM19239	Dnase	43960	64679	0.679664	13900.3	956.765	31.418	3.16251	5.73769e-217	1.435e-213	Null_Model_OpenChrom	human
Roadmapepigenomics_Dnase_narrow	CD3_Primary_Cells_Peripheral_UWUW	Dnase	42711	64679	0.660353	13351.9	934.474	31.4178	3.19887	5.7812e-217	1.44588e-213	Null_Model_OpenChrom	human
DNaseClusters	H9ES	Dnase	35397	64679	0.547272	9532.43	823.275	31.4167	3.71332	5.99049e-217	1.49822e-213	Null_Model_OpenChrom	human
DNaseClusters	A549	Dnase	35430	64679	0.547782	9787.13	816.219	31.4167	3.62006	5.99079e-217	1.4983e-213	Null_Model_OpenChrom	human
DNaseI_Duke	Ishikawa+4OHTAM_100nM_30m	Dnase	34949	64679	0.540345	9684.92	804.162	31.4167	3.6086	5.99327e-217	1.49892e-213	Null_Model_OpenChrom	human
DNaseClusters	HMVEC-LLy	Dnase	34223	64679	0.529121	8330.87	824.167	31.4161	4.10797	6.09855e-217	1.52525e-213	Null_Model_OpenChrom	human
DNaseI_Duke	CLL	Dnase	39984	64679	0.618191	11937.5	892.745	31.416	3.34944	6.11727e-217	1.52993e-213	Null_Model_OpenChrom	human
DNaseI_Duke	HEK293T	Dnase	36832	64679	0.569458	10105.6	850.758	31.4148	3.64471	6.35056e-217	1.58828e-213	Null_Model_OpenChrom	human
DNaseI_Duke	Mel_2183	Dnase	33868	64679	0.523632	8859.2	796.085	31.4147	3.82292	6.36989e-217	1.59311e-213	Null_Model_OpenChrom	human
DNaseI_Duke	K562+G1_phase	Dnase	34647	64679	0.535676	9601.11	797.268	31.4146	3.60865	6.38566e-217	1.59705e-213	Null_Model_OpenChrom	human
Roadmapepigenomics_ActiveChromatin	CD19_Primary_Peripheral_UW	ActiveChromatin	42739	64679	0.660786	13955.4	916.251	31.4145	3.06254	6.41228e-217	1.60371e-213	Null_Model_OpenChrom	human
DNaseClusters	HTR8svn	Dnase	31728	64679	0.490546	7834.49	760.655	31.4118	4.04979	6.99057e-217	1.74834e-213	Null_Model_OpenChrom	human
DNaseClusters	HMVEC-dBl-Neo	Dnase	35445	64679	0.548014	9785.12	816.932	31.41	3.62234	7.37885e-217	1.84545e-213	Null_Model_OpenChrom	human
DNaseI_Duke	ECC-1+DMSO_0.02pct	Dnase	35740	64679	0.552575	9927.39	821.817	31.4092	3.60014	7.57372e-217	1.89419e-213	Null_Model_OpenChrom	human
DNaseI_Duke	K562	Dnase	36049	64679	0.557352	10368.6	817.624	31.4085	3.47673	7.73982e-217	1.93573e-213	Null_Model_OpenChrom	human
DNaseI_Duke	K562+G2-M_phase	Dnase	34114	64679	0.527435	9451.68	785.284	31.4056	3.6093	8.48074e-217	2.12103e-213	Null_Model_OpenChrom	human
DNaseClusters	K562	Dnase	36758	64679	0.568314	10584.2	833.411	31.4056	3.4729	8.48698e-217	2.12259e-213	Null_Model_OpenChrom	human
DNaseI_Duke	ECC-1+Estradiol_10nM_30m	Dnase	35448	64679	0.54806	10379.4	798.258	31.4042	3.41523	8.87295e-217	2.21912e-213	Null_Model_OpenChrom	human
DNaseI_Duke	MCF7	Dnase	35417	64679	0.547581	10043.1	807.989	31.4038	3.52652	8.97386e-217	2.24436e-213	Null_Model_OpenChrom	human
DNaseClusters	HPDE6-E6E7	Dnase	30974	64679	0.478888	8267.96	723.041	31.4035	3.74627	9.05599e-217	2.2649e-213	Null_Model_OpenChrom	human
DNaseI_Duke	GM13977	Dnase	42150	64679	0.65168	13702.2	905.887	31.4033	3.07616	9.11815e-217	2.28045e-213	Null_Model_OpenChrom	human
Roadmapepigenomics_Histone_narrow	CD19_Primary_Cells_Peripheral_UW	H3K4me1	41671	64679	0.644274	13834.2	886.506	31.4005	3.01216	9.95271e-217	2.48917e-213	Null_Model_OpenChrom	human
DNaseClusters	HSMM_emb	Dnase	31428	64679	0.485907	8109.45	742.617	31.4005	3.87548	9.96306e-217	2.49176e-213	Null_Model_OpenChrom	human
DNaseClusters	Huh-7	Dnase	33871	64679	0.523678	8892.22	795.503	31.4	3.80906	1.01182e-216	2.53055e-213	Null_Model_OpenChrom	human
Roadmapepigenomics_Histone_narrow	CD19_Primary_Cells_Peripheral_UW	H3K27ac	26641	64679	0.411896	6068.82	655.167	31.3999	4.38982	1.01488e-216	2.5382e-213	Null_Model_OpenChrom	human
DNaseClusters	Adult_CD4_Th0	Dnase	37884	64679	0.585723	11491.1	840.616	31.3971	3.29681	1.10806e-216	2.77125e-213	Null_Model_OpenChrom	human
Roadmapepigenomics_Dnase_narrow	Small_Intestine	Dnase	41815	64679	0.6465	13940.4	887.814	31.3969	2.99956	1.11419e-216	2.7866e-213	Null_Model_OpenChrom	human
DNaseClusters	HUVEC	Dnase	35585	64679	0.550179	11118.9	779.269	31.3963	3.20041	1.13803e-216	2.84621e-213	Null_Model_OpenChrom	human
DNaseClusters	MCF-7+Hypoxia_LacAcid	Dnase	32798	64679	0.507089	8888.91	761.541	31.3957	3.68977	1.15933e-216	2.89948e-213	Null_Model_OpenChrom	human
GSE62742_Histone	GM19223	H3K4ME3	28550	64679	0.441411	7515.39	670.029	31.3936	3.79887	1.23832e-216	3.09703e-213	Null_Model_OpenChrom	human
DNaseClusters	WERI-Rb-1	Dnase	32876	64679	0.508295	8972.72	761.416	31.3932	3.664	1.25304e-216	3.13385e-213	Null_Model_OpenChrom	human
Roadmapepigenomics_Histone_narrow	GM12878_Lymphoblastoid	H3K4me2	35592	64679	0.550287	10942.7	785.193	31.3927	3.25258	1.27341e-216	3.1848e-213	Null_Model_OpenChrom	human
DNaseClusters	HRGEC	Dnase	30622	64679	0.473446	8030.99	719.701	31.3894	3.81298	1.41004e-216	3.52651e-213	Null_Model_OpenChrom	human
DNaseI_Duke	K562+SAHA_1uM_72hr	Dnase	35041	64679	0.541768	10409.4	784.71	31.3894	3.36628	1.41134e-216	3.52977e-213	Null_Model_OpenChrom	human
DNaseClusters	HepG2	Dnase	36038	64679	0.557182	10858.2	802.179	31.3892	3.31896	1.42034e-216	3.55226e-213	Null_Model_OpenChrom	human
DNaseI_Duke	K562+SAHA_ctrl	Dnase	36720	64679	0.567727	11319.5	809.214	31.3891	3.24397	1.42297e-216	3.55884e-213	Null_Model_OpenChrom	human
DNaseClusters	HConF	Dnase	32718	64679	0.505852	9193.41	749.595	31.3831	3.55885	1.72166e-216	4.30588e-213	Null_Model_OpenChrom	human
GSE62742_Histone	GM19144	H3K27AC	32544	64679	0.503162	9705.69	727.733	31.3828	3.35309	1.73608e-216	4.34194e-213	Null_Model_OpenChrom	human
GSE62742_Histone	GM19140	H3K27AC	32286	64679	0.499173	9130.28	737.865	31.3821	3.53614	1.7777e-216	4.44602e-213	Null_Model_OpenChrom	human
DNaseI_Duke	GM13976	Dnase	43024	64679	0.665193	14337.7	914.146	31.3804	3.00076	1.87104e-216	4.67947e-213	Null_Model_OpenChrom	human
GSE62742_Histone	GM18508	H3K4ME3	28608	64679	0.442307	7518.77	672.054	31.3803	3.80488	1.88069e-216	4.7036e-213	Null_Model_OpenChrom	human
DNaseClusters	HMVEC-LBl	Dnase	34076	64679	0.526848	9888.86	770.782	31.38	3.4459	1.89614e-216	4.74224e-213	Null_Model_OpenChrom	human
GSE62742_Histone	GM18907	H3K4ME3	28905	64679	0.446899	7864.44	670.513	31.3798	3.67541	1.90894e-216	4.77425e-213	Null_Model_OpenChrom	human
DNaseI_Duke	iSP_NIHi11	Dnase	37483	64679	0.579523	12568.4	793.97	31.3798	2.98232	1.91055e-216	4.77829e-213	Null_Model_OpenChrom	human
DNaseI_Duke	Adult_CD4_Th0	Dnase	36474	64679	0.563923	11926.2	782.286	31.3795	3.0583	1.92391e-216	4.8117e-213	Null_Model_OpenChrom	human
GSE62742_Histone	GM19119	H3K27AC	31560	64679	0.487948	9123.37	715.013	31.3793	3.45925	1.93793e-216	4.84676e-213	Null_Model_OpenChrom	human
GSE62742_Histone	GM19203	H3K27AC	31478	64679	0.48668	8574.86	729.884	31.3791	3.67097	1.94847e-216	4.87311e-213	Null_Model_OpenChrom	human
DNaseClusters	T-47D	Dnase	30976	64679	0.478919	8674.47	710.713	31.3791	3.57094	1.95035e-216	4.87781e-213	Null_Model_OpenChrom	human
GSE62742_Histone	GM19127	H3K27AC	32507	64679	0.50259	9552.14	731.537	31.379	3.40311	1.96007e-216	4.90214e-213	Null_Model_OpenChrom	human
Roadmapepigenomics_Dnase_narrow	Gastric	Dnase	32759	64679	0.506486	9947.5	726.975	31.3787	3.29319	1.97741e-216	4.9455e-213	Null_Model_OpenChrom	human
GSE62742_Histone	GM19137	H3K4ME3	28375	64679	0.438705	7645.49	660.629	31.3785	3.71134	1.99106e-216	4.97963e-213	Null_Model_OpenChrom	human
GSE62742_Histone	GM19144	H3K4ME3	28179	64679	0.435675	7546.43	657.547	31.3781	3.73408	2.01388e-216	5.03672e-213	Null_Model_OpenChrom	human
GSE62742_Histone	GM18489	H3K4ME3	27935	64679	0.431902	7528.73	650.346	31.3775	3.71045	2.04897e-216	5.12448e-213	Null_Model_OpenChrom	human
GSE62742_Histone	GM19239	H3K4ME3	30391	64679	0.469874	8458.17	699.007	31.3771	3.59309	2.07474e-216	5.18893e-213	Null_Model_OpenChrom	human
GSE62742_Histone	GM19140	H3K4ME3	27566	64679	0.426197	7109.23	651.983	31.3762	3.8775	2.13391e-216	5.33692e-213	Null_Model_OpenChrom	human
DNaseClusters	SK-N-MC	Dnase	27168	64679	0.420044	6869.73	646.949	31.3754	3.95474	2.19297e-216	5.48463e-213	Null_Model_OpenChrom	human
DNaseClusters	LNCaP+androgen	Dnase	30835	64679	0.476739	8655.95	706.903	31.3749	3.56229	2.22405e-216	5.56235e-213	Null_Model_OpenChrom	human
GSE62742_Histone	GM19131	H3K4ME3	28165	64679	0.435458	7547.68	657.13	31.3748	3.73161	2.23375e-216	5.58661e-213	Null_Model_OpenChrom	human
GSE62742_Histone	GM19116	H3K4ME3	27332	64679	0.422579	7333.61	637.404	31.3748	3.72695	2.235e-216	5.58975e-213	Null_Model_OpenChrom	human
GSE62742_Histone	GM18508	H3K27AC	31909	64679	0.493344	9271.47	721.525	31.3746	3.44163	2.24833e-216	5.62306e-213	Null_Model_OpenChrom	human
GSE62742_Histone	GM18517	H3K27AC	32382	64679	0.500657	9538.43	728.092	31.3745	3.3949	2.25138e-216	5.6307e-213	Null_Model_OpenChrom	human
DNaseI_Duke	MCF7+Hypoxia_LacAcid	Dnase	34617	64679	0.535212	10583.6	766.045	31.3734	3.27083	2.33326e-216	5.83549e-213	Null_Model_OpenChrom	human
GSE62742_Histone	GM18519	H3K4ME3	27068	64679	0.418498	7114.74	636.002	31.3729	3.8045	2.36837e-216	5.92328e-213	Null_Model_OpenChrom	human
GSE62742_Histone	GM18499	H3K27AC	32357	64679	0.500271	9777.79	719.713	31.3725	3.30923	2.39849e-216	5.99862e-213	Null_Model_OpenChrom	human
GSE62742_Histone	GM18510	H3K27AC	32151	64679	0.497086	9629.2	717.884	31.3725	3.33891	2.40341e-216	6.01093e-213	Null_Model_OpenChrom	human
GSE62742_Histone	GM19099	H3K4ME3	28069	64679	0.433974	7465.37	656.754	31.3719	3.7599	2.44541e-216	6.11598e-213	Null_Model_OpenChrom	human
GSE62742_Histone	GM18519	H3K27AC	31172	64679	0.481949	8816.04	712.611	31.3719	3.53583	2.44578e-216	6.11688e-213	Null_Model_OpenChrom	human
GSE62742_Histone	GM19108	H3K4ME3	27385	64679	0.423399	7291.94	640.486	31.3716	3.75551	2.47139e-216	6.18095e-213	Null_Model_OpenChrom	human
DNaseI_Duke	HTR8svn	Dnase	33051	64679	0.511	10240.2	727.128	31.3712	3.22759	2.50361e-216	6.26153e-213	Null_Model_OpenChrom	human
GSE62742_Histone	GM18505	H3K4ME3	27959	64679	0.432273	7308.41	658.271	31.3709	3.82559	2.52147e-216	6.3062e-213	Null_Model_OpenChrom	human
GSE62742_Histone	GM19093	H3K4ME3	27867	64679	0.430851	7655.52	644.278	31.3707	3.64012	2.53817e-216	6.34797e-213	Null_Model_OpenChrom	human
GSE62742_Histone	GM18855	H3K27AC	32888	64679	0.50848	9560.51	743.609	31.3706	3.43998	2.54508e-216	6.36524e-213	Null_Model_OpenChrom	human
DNaseI_Duke	MCF7+Hypoxia_LacAcid_ctrl	Dnase	36154	64679	0.558976	11651.5	781.067	31.3705	3.10294	2.55445e-216	6.38868e-213	Null_Model_OpenChrom	human
DNaseI_Duke	CD20+_RO01794	Dnase	39005	64679	0.603055	13518.3	812.441	31.3705	2.88535	2.55579e-216	6.39203e-213	Null_Model_OpenChrom	human
DNaseClusters	MCF-7	Dnase	35512	64679	0.54905	10753.1	789.252	31.37	3.30248	2.59435e-216	6.48848e-213	Null_Model_OpenChrom	human
GSE62742_Histone	GM19128	H3K4ME3	27500	64679	0.425177	7318.27	643.346	31.37	3.75772	2.59913e-216	6.50042e-213	Null_Model_OpenChrom	human
GSE62742_Histone	GM19160	H3K4ME3	25486	64679	0.394038	6746.47	597.374	31.3699	3.77768	2.6067e-216	6.51935e-213	Null_Model_OpenChrom	human
GSE62742_Histone	GM19203	H3K4ME3	26029	64679	0.402434	6581.54	619.968	31.3685	3.95485	2.72408e-216	6.81293e-213	Null_Model_OpenChrom	human
Roadmapepigenomics_Histone_narrow	CD19_Primary_Cells_Peripheral_UW	H3K4me3	22490	64679	0.347717	5097.76	554.46	31.3679	4.41175	2.77549e-216	6.94149e-213	Null_Model_OpenChrom	human
GSE62742_Histone	GM18516	H3K4ME3	28212	64679	0.436185	7646.21	655.641	31.3675	3.68967	2.81153e-216	7.03163e-213	Null_Model_OpenChrom	human
GSE62742_Histone	GM18859	H3K4ME3	26799	64679	0.414339	7020.53	630.548	31.3671	3.81723	2.84129e-216	7.10606e-213	Null_Model_OpenChrom	human
GSE62742_Histone	GM19130	H3K27AC	32574	64679	0.503626	9836.34	724.89	31.3671	3.3116	2.8477e-216	7.12211e-213	Null_Model_OpenChrom	human
GSE62742_Histone	GM18499	H3K4ME3	27311	64679	0.422255	7253.23	639.46	31.3667	3.76536	2.8786e-216	7.19938e-213	Null_Model_OpenChrom	human
DNaseClusters	RWPE1	Dnase	32268	64679	0.498895	9104.59	738.473	31.3666	3.54415	2.88714e-216	7.22073e-213	Null_Model_OpenChrom	human
GSE62742_Histone	GM18507	H3K4ME3	26510	64679	0.40987	7036.87	620.826	31.3665	3.7673	2.90089e-216	7.25512e-213	Null_Model_OpenChrom	human
DNaseI_Duke	A549	Dnase	34690	64679	0.536341	11192.8	749.126	31.3662	3.09932	2.929e-216	7.32542e-213	Null_Model_OpenChrom	human
GSE62742_Histone	GM18907	H3K27AC	32661	64679	0.504971	10090.4	719.603	31.3653	3.23683	3.00503e-216	7.51558e-213	Null_Model_OpenChrom	human
DNaseI_Duke	Colo829	Dnase	32516	64679	0.502729	9399.62	737.007	31.3652	3.45929	3.01656e-216	7.54441e-213	Null_Model_OpenChrom	human
Roadmapepigenomics_Histone_narrow	CD19_Primary_Cells_Cord_BI	H3K4me1	34126	64679	0.527621	10437.9	755.237	31.3651	3.26943	3.02377e-216	7.56244e-213	Null_Model_OpenChrom	human
GSE62742_Histone	GM19128	H3K27AC	32365	64679	0.500394	9730.85	721.636	31.3651	3.32602	3.03133e-216	7.58137e-213	Null_Model_OpenChrom	human
GSE62742_Histone	GM19101	H3K27AC	30815	64679	0.47643	8721.39	704.406	31.3649	3.53327	3.04738e-216	7.6215e-213	Null_Model_OpenChrom	human
GSE62742_Histone	GM19147	H3K27AC	31131	64679	0.481315	9223.31	698.487	31.3645	3.37525	3.08586e-216	7.71774e-213	Null_Model_OpenChrom	human
GSE62742_Histone	GM19171	H3K4ME3	27961	64679	0.432304	7588.34	649.546	31.3645	3.68473	3.08923e-216	7.72616e-213	Null_Model_OpenChrom	human
GSE62742_Histone	GM18858	H3K4ME3	27414	64679	0.423847	7283.03	641.841	31.3644	3.76409	3.09501e-216	7.74062e-213	Null_Model_OpenChrom	human
GSE62742_Histone	GM19240	H3K27AC	32425	64679	0.501322	10046.6	713.498	31.3643	3.22745	3.10393e-216	7.76292e-213	Null_Model_OpenChrom	human
DNaseClusters	HPF	Dnase	31039	64679	0.479893	9200.12	696.301	31.3641	3.37376	3.12259e-216	7.8096e-213	Null_Model_OpenChrom	human
GSE62742_Histone	GM18505	H3K27AC	31810	64679	0.491813	9246.87	719.417	31.3631	3.44008	3.22662e-216	8.06979e-213	Null_Model_OpenChrom	human
GSE62742_Histone	GM18486	H3K4ME3	29582	64679	0.457366	8005.02	687.977	31.3629	3.69543	3.24205e-216	8.10838e-213	Null_Model_OpenChrom	human
GSE62742_Histone	GM18486	H3K27AC	32028	64679	0.495184	9718.43	711.338	31.3628	3.29559	3.25183e-216	8.13282e-213	Null_Model_OpenChrom	human
GSE62742_Histone	GM18510	H3K4ME3	27390	64679	0.423476	7236.72	642.601	31.362	3.78486	3.33499e-216	8.34081e-213	Null_Model_OpenChrom	human
GSE62742_Histone	GM19204	H3K27AC	32209	64679	0.497982	9652.32	719.259	31.361	3.33692	3.44592e-216	8.61825e-213	Null_Model_OpenChrom	human
GSE62742_Histone	GM18502	H3K4ME3	26781	64679	0.41406	7238.19	623.159	31.3609	3.69996	3.45727e-216	8.64663e-213	Null_Model_OpenChrom	human
GSE62742_Histone	GM19141	H3K4ME3	28463	64679	0.440066	7829.35	657.947	31.3606	3.63542	3.48354e-216	8.71233e-213	Null_Model_OpenChrom	human
GSE62742_Histone	GM18858	H3K27AC	32871	64679	0.508218	10167.4	723.96	31.3603	3.23297	3.52462e-216	8.81507e-213	Null_Model_OpenChrom	human
GSE62742_Histone	GM18855	H3K4ME3	27243	64679	0.421203	7042.85	644.145	31.3596	3.86818	3.59439e-216	8.98957e-213	Null_Model_OpenChrom	human
GSE62742_Histone	GM18520	H3K4ME3	27743	64679	0.428934	7595.7	642.46	31.3596	3.65246	3.59611e-216	8.99386e-213	Null_Model_OpenChrom	human
GSE62742_Histone	GM18862	H3K4ME3	26879	64679	0.415575	7269.51	625.32	31.3591	3.6975	3.65089e-216	9.13088e-213	Null_Model_OpenChrom	human
GSE62742_Histone	GM19130	H3K4ME3	27912	64679	0.431547	7564.59	648.87	31.3582	3.68982	3.75987e-216	9.40344e-213	Null_Model_OpenChrom	human
GSE62742_Histone	GM18859	H3K27AC	32272	64679	0.498956	9488.42	726.559	31.3582	3.4012	3.76407e-216	9.41394e-213	Null_Model_OpenChrom	human
GSE62742_Histone	GM18912	H3K4ME3	28156	64679	0.435319	7722.09	651.64	31.3577	3.64616	3.82427e-216	9.56451e-213	Null_Model_OpenChrom	human
Roadmapepigenomics_Histone_narrow	GM12878_Lymphoblastoid	H3K9ac	24711	64679	0.382056	6293.76	587.331	31.3575	3.92627	3.84391e-216	9.61363e-213	Null_Model_OpenChrom	human
GSE62742_Histone	GM18501	H3K27AC	31912	64679	0.49339	9682.13	708.929	31.357	3.29597	3.90987e-216	9.77858e-213	Null_Model_OpenChrom	human
DNaseClusters	Gliobla	Dnase	32533	64679	0.502992	9945.56	720.334	31.3569	3.27111	3.91821e-216	9.79946e-213	Null_Model_OpenChrom	human
DNaseI_Duke	iPS_NIHi7	Dnase	36967	64679	0.571546	11774.4	803.418	31.3567	3.1396	3.93665e-216	9.84555e-213	Null_Model_OpenChrom	human
Roadmapepigenomics_Histone_narrow	GM12878_Lymphoblastoid	H3K27ac	27827	64679	0.430232	7755.55	640.102	31.3567	3.58801	3.94794e-216	9.8738e-213	Null_Model_OpenChrom	human
GSE62742_Histone	GM19102	H3K4ME3	27815	64679	0.430047	7620.61	644.023	31.3566	3.64997	3.94836e-216	9.87484e-213	Null_Model_OpenChrom	human
GSE62742_Histone	GM19092	H3K4ME3	27618	64679	0.427001	7822.25	631.312	31.3565	3.5307	3.96198e-216	9.90891e-213	Null_Model_OpenChrom	human
Roadmapepigenomics_Dnase_narrow	Fetal_Intestine_Small	Dnase	33213	64679	0.513505	9931.97	742.463	31.3565	3.34405	3.96672e-216	9.92078e-213	Null_Model_OpenChrom	human
GSE62742_Histone	GM19160	H3K27AC	29789	64679	0.460567	8720.99	671.889	31.3564	3.41578	3.98189e-216	9.95871e-213	Null_Model_OpenChrom	human
GSE62742_Histone	GM19143	H3K4ME3	26870	64679	0.415436	7276.86	624.856	31.3562	3.69253	3.99814e-216	9.99936e-213	Null_Model_OpenChrom	human
GSE62742_Histone	GM18861	H3K27AC	31870	64679	0.492741	9681.2	707.64	31.356	3.29195	4.02406e-216	1.00642e-212	Null_Model_OpenChrom	human
Roadmapepigenomics_Dnase_narrow	H9_Cell_Line	Dnase	38702	64679	0.59837	13184.4	813.81	31.3558	2.93545	4.05632e-216	1.01449e-212	Null_Model_OpenChrom	human
DNaseClusters	SK-N-SH_RA	Dnase	23129	64679	0.357597	5407.03	565.199	31.3553	4.27758	4.12407e-216	1.03143e-212	Null_Model_OpenChrom	human
GSE62742_Histone	GM19209	H3K4ME3	27546	64679	0.425888	7569.43	637.112	31.3549	3.63911	4.17183e-216	1.04337e-212	Null_Model_OpenChrom	human
GSE62742_Histone	GM19114	H3K4ME3	27803	64679	0.429861	7433.49	649.644	31.3549	3.74023	4.17196e-216	1.04341e-212	Null_Model_OpenChrom	human
GSE62742_Histone	GM19099	H3K27AC	31841	64679	0.492293	9627.28	708.465	31.3547	3.30737	4.19859e-216	1.05007e-212	Null_Model_OpenChrom	human
GSE62742_Histone	GM18504	H3K4ME3	27465	64679	0.424636	7365.48	641.056	31.3538	3.72888	4.32231e-216	1.08101e-212	Null_Model_OpenChrom	human
DNaseClusters	HeLa-S3	Dnase	34636	64679	0.535506	10736.1	762.278	31.3532	3.22612	4.39493e-216	1.09917e-212	Null_Model_OpenChrom	human
GSE62742_Histone	GM19206	H3K27AC	32181	64679	0.497549	9634.49	719.124	31.3528	3.34019	4.46157e-216	1.11584e-212	Null_Model_OpenChrom	human
GSE62742_Histone	GM19190	H3K4ME3	28856	64679	0.446142	8067.53	663.051	31.3527	3.57681	4.46594e-216	1.11693e-212	Null_Model_OpenChrom	human
DNaseI_Duke	HepG2	Dnase	34189	64679	0.528595	10893.4	743.037	31.3519	3.13852	4.58029e-216	1.14553e-212	Null_Model_OpenChrom	human
GSE62742_Histone	GM19127	H3K4ME3	27742	64679	0.428918	7326.75	651.164	31.3519	3.7864	4.58123e-216	1.14576e-212	Null_Model_OpenChrom	human
GSE62742_Histone	GM19204	H3K4ME3	25109	64679	0.388209	6482.15	594.123	31.3518	3.87356	4.59243e-216	1.14857e-212	Null_Model_OpenChrom	human
GSE62742_Histone	GM19152	H3K4ME3	26218	64679	0.405356	6782.4	619.925	31.3515	3.86559	4.63823e-216	1.16002e-212	Null_Model_OpenChrom	human
GSE62742_Histone	GM19240	H3K4ME3	30991	64679	0.479151	8896.1	704.756	31.3512	3.48366	4.69076e-216	1.17316e-212	Null_Model_OpenChrom	human
Roadmapepigenomics_ActiveChromatin	CD19_Primary_Cord_BI	2_TssAFlnk	20691	64679	0.319903	4591.85	513.515	31.3509	4.50603	4.7317e-216	1.1834e-212	Null_Model_OpenChrom	human
GSE62742_Histone	GM18916	H3K27AC	30274	64679	0.468065	9061.81	676.611	31.3506	3.34083	4.76853e-216	1.19261e-212	Null_Model_OpenChrom	human
GSE62742_Histone	GM19239	H3K27AC	32141	64679	0.496931	9653.26	717.302	31.3504	3.32955	4.79689e-216	1.1997e-212	Null_Model_OpenChrom	human
GSE62742_Histone	GM19116	H3K27AC	32380	64679	0.500626	9748.43	721.893	31.3503	3.32156	4.8171e-216	1.20476e-212	Null_Model_OpenChrom	human
GSE62742_Histone	GM18852	H3K27AC	32259	64679	0.498755	9815.12	715.908	31.3502	3.28666	4.82666e-216	1.20715e-212	Null_Model_OpenChrom	human
GSE62742_Histone	GM19209	H3K27AC	32117	64679	0.49656	10024	704.719	31.3502	3.20402	4.83911e-216	1.21026e-212	Null_Model_OpenChrom	human
GSE62742_Histone	GM18913	H3K27AC	31583	64679	0.488304	9420.75	706.927	31.3501	3.35249	4.84731e-216	1.21231e-212	Null_Model_OpenChrom	human
GSE62742_Histone	GM19257	H3K4ME3	26582	64679	0.410983	7073.53	622.279	31.35	3.75796	4.85834e-216	1.21507e-212	Null_Model_OpenChrom	human
GSE62742_Histone	GM18517	H3K4ME3	26394	64679	0.408077	6886.97	622.233	31.35	3.83245	4.86026e-216	1.21555e-212	Null_Model_OpenChrom	human
GSE62742_Histone	GM19137	H3K27AC	31445	64679	0.48617	9542.52	698.643	31.35	3.29525	4.86187e-216	1.21595e-212	Null_Model_OpenChrom	human
DNaseI_Duke	Urothelia	Dnase	32643	64679	0.504692	9723.19	731.097	31.3499	3.35723	4.88185e-216	1.22095e-212	Null_Model_OpenChrom	human
GSE62742_Histone	GM19152	H3K27AC	31334	64679	0.484454	9042.66	711.057	31.3496	3.46513	4.9272e-216	1.23229e-212	Null_Model_OpenChrom	human
DNaseI_Duke	iPS_CWRU1	Dnase	37471	64679	0.579338	12376.8	800.464	31.3495	3.02752	4.93542e-216	1.23435e-212	Null_Model_OpenChrom	human
GSE62742_Histone	GM19201	H3K4ME3	27887	64679	0.43116	7772.05	641.636	31.3495	3.58811	4.94562e-216	1.2369e-212	Null_Model_OpenChrom	human
GSE62742_Histone	GM19098	H3K4ME3	27931	64679	0.43184	7588.19	648.906	31.3494	3.68085	4.95799e-216	1.23999e-212	Null_Model_OpenChrom	human
GSE62742_Histone	GM19210	H3K4ME3	27109	64679	0.419131	7526.2	624.666	31.3492	3.60195	4.98055e-216	1.24564e-212	Null_Model_OpenChrom	human
GSE62742_Histone	GM19171	H3K27AC	31967	64679	0.494241	9688.1	710.678	31.3488	3.29961	5.05468e-216	1.26417e-212	Null_Model_OpenChrom	human
Roadmapepigenomics_Histone_narrow	GM12878_Lymphoblastoid	H3K4me3	26431	64679	0.408649	7013.23	619.414	31.3486	3.76873	5.08518e-216	1.2718e-212	Null_Model_OpenChrom	human
GSE62742_Histone	GM18516	H3K27AC	31908	64679	0.493329	9543.94	713.399	31.3486	3.34327	5.08584e-216	1.27197e-212	Null_Model_OpenChrom	human
GSE62742_Histone	GM19206	H3K4ME3	26833	64679	0.414864	7221.94	625.604	31.3474	3.71549	5.27825e-216	1.32009e-212	Null_Model_OpenChrom	human
GSE62742_Histone	GM18909	H3K27AC	31956	64679	0.494071	9728.74	709.069	31.3471	3.2847	5.32597e-216	1.33203e-212	Null_Model_OpenChrom	human
GSE62742_Histone	GM18522	H3K27AC	31849	64679	0.492416	9798.57	703.429	31.3471	3.25037	5.33163e-216	1.33344e-212	Null_Model_OpenChrom	human
GSE62742_Histone	GM18856	H3K4ME3	27356	64679	0.42295	7558.61	631.556	31.347	3.61918	5.34785e-216	1.3375e-212	Null_Model_OpenChrom	human
GSE62742_Histone	GM18522	H3K4ME3	26006	64679	0.402078	6941.23	608.198	31.3464	3.7466	5.45464e-216	1.36421e-212	Null_Model_OpenChrom	human
GSE62742_Histone	GM19172	H3K4ME3	26837	64679	0.414926	7315.51	622.769	31.3463	3.66851	5.46652e-216	1.36718e-212	Null_Model_OpenChrom	human
GSE62742_Histone	GM18862	H3K27AC	30870	64679	0.47728	9256.44	689.51	31.3463	3.33498	5.46985e-216	1.36801e-212	Null_Model_OpenChrom	human
Roadmapepigenomics_ActiveChromatin	CD19_Primary_Cord_BI	ActiveChromatin	36814	64679	0.56918	11926.5	793.962	31.3459	3.08673	5.52615e-216	1.38209e-212	Null_Model_OpenChrom	human
GSE62742_Histone	GM19138	H3K27AC	31808	64679	0.491782	9877.95	699.622	31.3456	3.2201	5.58625e-216	1.39712e-212	Null_Model_OpenChrom	human
GSE62742_Histone	GM18852	H3K4ME3	25348	64679	0.391905	6713.17	594.498	31.3455	3.77586	5.60193e-216	1.40104e-212	Null_Model_OpenChrom	human
GSE62742_Histone	GM19108	H3K27AC	32430	64679	0.501399	9681.9	725.726	31.3453	3.34955	5.63937e-216	1.41041e-212	Null_Model_OpenChrom	human
GSE62742_Histone	GM19143	H3K27AC	32299	64679	0.499374	9830.92	716.814	31.3444	3.28545	5.80491e-216	1.45181e-212	Null_Model_OpenChrom	human
GSE62742_Histone	GM18870	H3K4ME3	26468	64679	0.409221	7148.73	616.362	31.344	3.70248	5.86827e-216	1.46765e-212	Null_Model_OpenChrom	human
DNaseClusters	H7-hESC	Dnase	37696	64679	0.582817	12999.7	787.913	31.344	2.89976	5.87802e-216	1.47009e-212	Null_Model_OpenChrom	human
GSE62742_Histone	GM19257	H3K27AC	31385	64679	0.485243	9462.22	699.427	31.3439	3.31687	5.88573e-216	1.47202e-212	Null_Model_OpenChrom	human
Roadmapepigenomics_Dnase_narrow	H1_Cell_Line	Dnase	41073	64679	0.635028	15063.4	829.819	31.3438	2.72668	5.91468e-216	1.47926e-212	Null_Model_OpenChrom	human
GSE62742_Histone	GM19153	H3K4ME3	27617	64679	0.426986	7683.42	635.98	31.3431	3.59436	6.04472e-216	1.51179e-212	Null_Model_OpenChrom	human
GSE62742_Histone	GM18489	H3K27AC	31821	64679	0.491983	9568.33	709.971	31.3431	3.32566	6.04752e-216	1.51249e-212	Null_Model_OpenChrom	human
GSE62742_Histone	GM18501	H3K4ME3	27845	64679	0.430511	7614.39	645.471	31.3424	3.65689	6.17406e-216	1.54413e-212	Null_Model_OpenChrom	human
DNaseClusters	HFF-Myc	Dnase	35041	64679	0.541768	11934.4	737.233	31.3424	2.93614	6.179e-216	1.54537e-212	Null_Model_OpenChrom	human
GSE62742_Histone	GM19101	H3K4ME3	25346	64679	0.391874	6526.42	600.452	31.3423	3.8836	6.18536e-216	1.54696e-212	Null_Model_OpenChrom	human
GSE62742_Histone	GM19223	H3K27AC	31756	64679	0.490979	9231.8	718.656	31.3421	3.43985	6.22603e-216	1.55713e-212	Null_Model_OpenChrom	human
GSE62742_Histone	GM19238	H3K4ME3	29727	64679	0.459608	8728.01	669.999	31.3418	3.40593	6.29205e-216	1.57364e-212	Null_Model_OpenChrom	human
GSE62742_Histone	GM19098	H3K27AC	32134	64679	0.496823	9829.78	711.645	31.3418	3.26905	6.29833e-216	1.57521e-212	Null_Model_OpenChrom	human
GSE62742_Histone	GM18498	H3K4ME3	27242	64679	0.421188	7538.22	628.684	31.3413	3.61385	6.38855e-216	1.59778e-212	Null_Model_OpenChrom	human
DNaseI_Duke	RWPE1	Dnase	33643	64679	0.520153	11016.5	721.944	31.3411	3.05387	6.43513e-216	1.60943e-212	Null_Model_OpenChrom	human
Roadmapepigenomics_ActiveChromatin	CD4_Naive_Primary	1_TssA	15427	64679	0.238516	3108.04	393.062	31.3411	4.96358	6.44082e-216	1.61085e-212	Null_Model_OpenChrom	human
Roadmapepigenomics_Histone_narrow	CD19_Primary_Cells_Cord_BI	H3K4me3	20241	64679	0.312945	4637.56	497.869	31.3405	4.36458	6.55725e-216	1.63997e-212	Null_Model_OpenChrom	human
DNaseClusters	AoSMC+serum_free_media	Dnase	30667	64679	0.474142	9745.29	667.576	31.3398	3.14685	6.69341e-216	1.67402e-212	Null_Model_OpenChrom	human
Roadmapepigenomics_ActiveChromatin	GM12878_Lymphoblastoid	ActiveChromatin	39993	64679	0.618331	14722.8	806.339	31.3395	2.7164	6.77045e-216	1.69329e-212	Null_Model_OpenChrom	human
GSE62742_Histone	GM19114	H3K27AC	32398	64679	0.500904	10137.7	710.298	31.3395	3.19581	6.77294e-216	1.69391e-212	Null_Model_OpenChrom	human
GSE62742_Histone	GM18853	H3K27AC	31780	64679	0.49135	9725.02	703.746	31.3394	3.26786	6.78194e-216	1.69616e-212	Null_Model_OpenChrom	human
GSE62742_Histone	GM18511	H3K4ME3	26796	64679	0.414292	7176.72	626.027	31.3393	3.73374	6.79517e-216	1.69947e-212	Null_Model_OpenChrom	human
GSE62742_Histone	GM19138	H3K4ME3	27883	64679	0.431098	7757.21	642.192	31.3392	3.59446	6.82814e-216	1.70772e-212	Null_Model_OpenChrom	human
GSE62742_Histone	GM18909	H3K4ME3	26906	64679	0.415993	7294.05	625.801	31.3389	3.68876	6.88522e-216	1.72199e-212	Null_Model_OpenChrom	human
GSE62742_Histone	GM18853	H3K4ME3	26006	64679	0.402078	6977.6	607.184	31.3387	3.72707	6.92395e-216	1.73168e-212	Null_Model_OpenChrom	human
DNaseClusters	Huh-7.5	Dnase	33524	64679	0.518314	10619.1	730.88	31.3387	3.15694	6.92539e-216	1.73204e-212	Null_Model_OpenChrom	human
GSE62742_Histone	GM19153	H3K27AC	32117	64679	0.49656	10091.2	702.834	31.3385	3.18267	6.97583e-216	1.74465e-212	Null_Model_OpenChrom	human
GSE62742_Histone	GM18861	H3K4ME3	27552	64679	0.425981	7408.07	642.787	31.3384	3.71919	6.99256e-216	1.74884e-212	Null_Model_OpenChrom	human
GSE62742_Histone	GM19222	H3K4ME3	27110	64679	0.419147	7264.53	633.268	31.3382	3.73183	7.05043e-216	1.76331e-212	Null_Model_OpenChrom	human
DNaseI_Duke	HPDE6-E6E7	Dnase	33250	64679	0.514077	10525.9	725.127	31.338	3.15886	7.08476e-216	1.7719e-212	Null_Model_OpenChrom	human
GSE62742_Histone	GM19207	H3K4ME3	26135	64679	0.404072	7258.15	602.373	31.3375	3.60078	7.20268e-216	1.80139e-212	Null_Model_OpenChrom	human
DNaseI_Duke	Gliobla	Dnase	33147	64679	0.512485	10704.5	716.164	31.3371	3.09655	7.28727e-216	1.82255e-212	Null_Model_OpenChrom	human
GSE62742_Histone	GM18511	H3K27AC	31429	64679	0.485923	9564.86	697.713	31.3369	3.28588	7.34602e-216	1.83724e-212	Null_Model_OpenChrom	human
GSE62742_Histone	GM19093	H3K27AC	30863	64679	0.477172	9575.59	679.328	31.336	3.22309	7.5461e-216	1.88728e-212	Null_Model_OpenChrom	human
GSE62742_Histone	GM19147	H3K4ME3	25261	64679	0.39056	6602.81	595.431	31.3356	3.82579	7.64965e-216	1.91318e-212	Null_Model_OpenChrom	human
GSE62742_Histone	GM19222	H3K27AC	32280	64679	0.49908	9974.86	711.817	31.3355	3.23614	7.66616e-216	1.91731e-212	Null_Model_OpenChrom	human
GSE62742_Histone	GM19131	H3K27AC	31227	64679	0.4828	9418.95	695.959	31.3352	3.31534	7.73021e-216	1.93332e-212	Null_Model_OpenChrom	human
GSE62742_Histone	GM18916	H3K4ME3	24758	64679	0.382783	6733.46	575.23	31.3345	3.67686	7.90944e-216	1.97815e-212	Null_Model_OpenChrom	human
GSE62742_Histone	GM19119	H3K4ME3	25608	64679	0.395924	6614.48	606.155	31.3344	3.8715	7.93273e-216	1.98398e-212	Null_Model_OpenChrom	human
DNaseI_Duke	H9ES	Dnase	36372	64679	0.562346	12270.3	769.178	31.3344	2.96423	7.94582e-216	1.98725e-212	Null_Model_OpenChrom	human
DNaseI_Duke	K562+NaBut	Dnase	34624	64679	0.535321	11387.8	741.566	31.3339	3.04044	8.05245e-216	2.01392e-212	Null_Model_OpenChrom	human
GSE62742_Histone	GM18912	H3K27AC	31154	64679	0.481671	9458.46	692.403	31.3337	3.29377	8.10932e-216	2.02814e-212	Null_Model_OpenChrom	human
GSE62742_Histone	GM18871	H3K4ME3	26685	64679	0.412576	7241.94	620.535	31.3327	3.68479	8.35825e-216	2.0904e-212	Null_Model_OpenChrom	human
DNaseClusters	Stellate	Dnase	32184	64679	0.497596	10130.3	703.865	31.3322	3.17699	8.49892e-216	2.12558e-212	Null_Model_OpenChrom	human
GSE62742_Histone	GM19102	H3K27AC	31632	64679	0.489061	9882.18	694.182	31.3316	3.20091	8.67285e-216	2.16908e-212	Null_Model_OpenChrom	human
GSE62742_Histone	GM18507	H3K27AC	31705	64679	0.49019	9452.38	710.231	31.3315	3.35418	8.68576e-216	2.17231e-212	Null_Model_OpenChrom	human
DNaseClusters	HPAF	Dnase	34207	64679	0.528873	11083.2	738.037	31.3315	3.08638	8.69699e-216	2.17512e-212	Null_Model_OpenChrom	human
GSE62742_Histone	GM19141	H3K27AC	32027	64679	0.495168	9936.61	705.064	31.331	3.22313	8.8193e-216	2.20571e-212	Null_Model_OpenChrom	human
GSE62742_Histone	GM19225	H3K27AC	31216	64679	0.48263	9720.03	686.112	31.3301	3.21151	9.08112e-216	2.27119e-212	Null_Model_OpenChrom	human
GSE62742_Histone	GM19190	H3K27AC	31943	64679	0.49387	10052.5	698.706	31.33	3.17761	9.09883e-216	2.27562e-212	Null_Model_OpenChrom	human
DNaseI_Duke	GM12891	Dnase	41796	64679	0.646207	16047.2	821.891	31.3287	2.60456	9.48779e-216	2.3729e-212	Null_Model_OpenChrom	human
DNaseI_Duke	Urothelia+UT189	Dnase	31764	64679	0.491102	9839.38	699.842	31.328	3.22825	9.71248e-216	2.42909e-212	Null_Model_OpenChrom	human
GSE62742_Histone	GM18504	H3K27AC	31037	64679	0.479862	9489.01	687.873	31.3255	3.27083	1.04757e-215	2.61996e-212	Null_Model_OpenChrom	human
DNaseClusters	HCF	Dnase	32538	64679	0.503069	10384.7	707.21	31.325	3.13327	1.06631e-215	2.66685e-212	Null_Model_OpenChrom	human
DNaseClusters	AG04450	Dnase	28942	64679	0.447471	8816.95	642.465	31.3248	3.28254	1.07351e-215	2.68484e-212	Null_Model_OpenChrom	human
GSE62742_Histone	GM18870	H3K27AC	30854	64679	0.477033	9305.84	687.902	31.3245	3.31555	1.08383e-215	2.71066e-212	Null_Model_OpenChrom	human
GSE62742_Histone	GM18502	H3K27AC	31320	64679	0.484238	9566.49	694.471	31.3239	3.27393	1.10457e-215	2.76252e-212	Null_Model_OpenChrom	human
GSE62742_Histone	GM19172	H3K27AC	29606	64679	0.457737	9035.7	656.705	31.3235	3.27656	1.11685e-215	2.79323e-212	Null_Model_OpenChrom	human
Roadmapepigenomics_ActiveChromatin	CD4+_CD25+_CD127-_Treg_Primary	1_TssA	13050	64679	0.201766	2354.48	341.458	31.3231	5.54264	1.13035e-215	2.82701e-212	Null_Model_OpenChrom	human
Roadmapepigenomics_Dnase_narrow	Pancreas	Dnase	37772	64679	0.583992	14327.1	748.494	31.3228	2.63641	1.14185e-215	2.85577e-212	Null_Model_OpenChrom	human
Roadmapepigenomics_ActiveChromatin	CD8_Naive_Primary	1_TssA	14666	64679	0.226751	2829.11	377.902	31.3226	5.18395	1.14898e-215	2.87359e-212	Null_Model_OpenChrom	human
DNaseI_Duke	Fibrobl_GM03348	Dnase	33626	64679	0.519891	11546	704.932	31.3222	2.91236	1.16213e-215	2.9065e-212	Null_Model_OpenChrom	human
GSE62742_Histone	GM19225	H3K4ME3	25245	64679	0.390312	6800.65	588.866	31.3218	3.71214	1.17791e-215	2.94596e-212	Null_Model_OpenChrom	human
GSE62742_Histone	GM18520	H3K27AC	30751	64679	0.47544	9498.99	678.507	31.3217	3.23729	1.18096e-215	2.95357e-212	Null_Model_OpenChrom	human
GSE62742_Histone	GM19200	H3K4ME3	28360	64679	0.438473	8286.39	640.894	31.3213	3.42248	1.19746e-215	2.99484e-212	Null_Model_OpenChrom	human
GSE62742_Histone	GM19092	H3K27AC	32033	64679	0.495261	10360.8	691.936	31.3211	3.09175	1.20282e-215	3.00826e-212	Null_Model_OpenChrom	human
DNaseI_Duke	SK-N-SH	Dnase	33006	64679	0.510305	11180.4	696.839	31.3209	2.95213	1.21249e-215	3.03244e-212	Null_Model_OpenChrom	human
DNaseI_Duke	FibroP_AG20443	Dnase	33675	64679	0.520648	11695.8	701.744	31.3208	2.87923	1.21512e-215	3.03902e-212	Null_Model_OpenChrom	human
DNaseClusters	HFF	Dnase	33923	64679	0.524482	11364.3	720.262	31.3201	2.98505	1.24136e-215	3.10464e-212	Null_Model_OpenChrom	human
GSE62742_Histone	GM18871	H3K27AC	30569	64679	0.472626	9171.1	683.212	31.3196	3.33319	1.26419e-215	3.16174e-212	Null_Model_OpenChrom	human
Roadmapepigenomics_ActiveChromatin	CD19_Primary_Peripheral_UW	2_TssAFlnk	15544	64679	0.240325	3000.84	400.514	31.3177	5.17988	1.34157e-215	3.35526e-212	Null_Model_OpenChrom	human
DNaseClusters	NHEK	Dnase	34775	64679	0.537655	12005.8	727.056	31.3169	2.89651	1.37291e-215	3.43364e-212	Null_Model_OpenChrom	human
GSE62742_Histone	GM19159	H3K27AC	30795	64679	0.476121	9752.78	671.918	31.3167	3.15756	1.38434e-215	3.46224e-212	Null_Model_OpenChrom	human
Roadmapepigenomics_Histone_narrow	Dnd41_TCell_Leukemia	H2A.Z	21294	64679	0.329226	5197.53	513.996	31.3163	4.09695	1.39919e-215	3.49937e-212	Null_Model_OpenChrom	human
GSE62742_Histone	GM18856	H3K27AC	31762	64679	0.491071	10130.5	690.755	31.3157	3.13527	1.42758e-215	3.57037e-212	Null_Model_OpenChrom	human
Roadmapepigenomics_ActiveChromatin	CD4+_CD25-_Th_Primary	1_TssA	12428	64679	0.192149	2161.41	327.844	31.3155	5.74996	1.43483e-215	3.5885e-212	Null_Model_OpenChrom	human
GSE62742_Histone	GM18913	H3K4ME3	25879	64679	0.400114	6962.65	604.059	31.3154	3.71683	1.43886e-215	3.59859e-212	Null_Model_OpenChrom	human
DNaseClusters	HCM	Dnase	33703	64679	0.521081	11268.2	716.433	31.3146	2.99099	1.47606e-215	3.69164e-212	Null_Model_OpenChrom	human
Roadmapepigenomics_ActiveChromatin	CD3_Primary_Cord_BI	1_TssA	15192	64679	0.234883	3066.52	387.217	31.3144	4.95415	1.48536e-215	3.71489e-212	Null_Model_OpenChrom	human
GSE62742_Histone	GM18498	H3K27AC	31940	64679	0.493823	10129	696.524	31.3141	3.15332	1.50211e-215	3.75678e-212	Null_Model_OpenChrom	human
DNaseClusters	Urothelia+UT189	Dnase	32002	64679	0.494782	10119.3	698.824	31.3136	3.16248	1.52253e-215	3.80785e-212	Null_Model_OpenChrom	human
GSE62742_Histone	GM19159	H3K4ME3	27068	64679	0.418498	7605.6	621.542	31.3131	3.55896	1.54828e-215	3.87225e-212	Null_Model_OpenChrom	human
Roadmapepigenomics_ActiveChromatin	CD4+_CD25-_CD45RO+_Memory_Primary	1_TssA	13333	64679	0.206141	2462.98	347.15	31.3121	5.41336	1.595e-215	3.98908e-212	Null_Model_OpenChrom	human
Roadmapepigenomics_ActiveChromatin	CD19_Primary_Peripheral_UW	1_TssA	12893	64679	0.199338	2206.87	341.284	31.3116	5.84221	1.6237e-215	4.06088e-212	Null_Model_OpenChrom	human
Roadmapepigenomics_Histone_narrow	CD3_Primary_Cells_Peripheral_UWUW	H3K4me3	22273	64679	0.344362	5811.35	525.741	31.3113	3.83267	1.63563e-215	4.09072e-212	Null_Model_OpenChrom	human
Roadmapepigenomics_Histone_narrow	CD56_Primary_Cells	H3K4me3	20560	64679	0.317878	4963.11	498.131	31.3108	4.14256	1.66273e-215	4.15849e-212	Null_Model_OpenChrom	human
GSE62742_Histone	GM19207	H3K27AC	31832	64679	0.492154	10298.8	687.742	31.31	3.09084	1.70683e-215	4.26879e-212	Null_Model_OpenChrom	human
DNaseClusters	Th1	Dnase	40652	64679	0.628519	15905	790.415	31.3088	2.55592	1.77049e-215	4.428e-212	Null_Model_OpenChrom	human
GSE62742_Histone	GM19201	H3K27AC	31580	64679	0.488257	10173.6	683.729	31.3083	3.10411	1.80038e-215	4.50275e-212	Null_Model_OpenChrom	human
DNaseClusters	HEEpiC	Dnase	33244	64679	0.513984	11499	694.56	31.3075	2.89103	1.84208e-215	4.60704e-212	Null_Model_OpenChrom	human
Roadmapepigenomics_Histone_narrow	CD8_Memory_Primary_Cells	H3K4me3	21938	64679	0.339183	5917.96	511.7	31.3075	3.70702	1.84431e-215	4.61261e-212	Null_Model_OpenChrom	human
DNaseClusters	HCPEpiC	Dnase	34426	64679	0.532259	12030.9	715.334	31.3072	2.86147	1.86144e-215	4.65546e-212	Null_Model_OpenChrom	human
Roadmapepigenomics_Histone_narrow	CD56_Primary_Cells	H3K27ac	25030	64679	0.386988	6885.71	579.559	31.3071	3.63507	1.86863e-215	4.67344e-212	Null_Model_OpenChrom	human
Roadmapepigenomics_ActiveChromatin	CD4+_CD25int_CD127+_Tmem_Primary	1_TssA	15940	64679	0.246448	3399.05	400.592	31.306	4.68954	1.93163e-215	4.83101e-212	Null_Model_OpenChrom	human
GSE62742_Histone	GM19238	H3K27AC	31255	64679	0.483233	10141.1	674.452	31.3052	3.08201	1.97942e-215	4.95052e-212	Null_Model_OpenChrom	human
DNaseI_Duke	HSMM_emb	Dnase	33768	64679	0.522086	11991.9	695.611	31.305	2.8159	1.99679e-215	4.99396e-212	Null_Model_OpenChrom	human
Roadmapepigenomics_Dnase_narrow	K562_Leukemia	Dnase	38603	64679	0.59684	13976.3	786.688	31.3043	2.76203	2.04052e-215	5.10334e-212	Null_Model_OpenChrom	human
GSE62742_Histone	GM18523	H3K4ME3	25251	64679	0.390405	7048.25	581.487	31.3038	3.58259	2.07136e-215	5.18047e-212	Null_Model_OpenChrom	human
Roadmapepigenomics_Histone_narrow	CD4+_CD25-_CD45RO+_Memory_Primary_Cells	H3K4me3	21897	64679	0.338549	5856.55	512.414	31.3037	3.73889	2.07688e-215	5.19429e-212	Null_Model_OpenChrom	human
Roadmapepigenomics_Dnase_narrow	HUVEC_Umbilical_Vein_Endothelial_Cells	Dnase	34477	64679	0.533048	11859.2	722.543	31.303	2.90719	2.12231e-215	5.3079e-212	Null_Model_OpenChrom	human
Roadmapepigenomics_ActiveChromatin	CD4_Memory_Primary	1_TssA	14900	64679	0.230368	2923.98	382.587	31.3027	5.09579	2.14116e-215	5.35503e-212	Null_Model_OpenChrom	human
DNaseClusters	RPTEC	Dnase	29363	64679	0.45398	9342.22	639.602	31.302	3.14304	2.19447e-215	5.48837e-212	Null_Model_OpenChrom	human
DNaseClusters	HMF	Dnase	31798	64679	0.491628	10469	681.402	31.3017	3.03736	2.21135e-215	5.53058e-212	Null_Model_OpenChrom	human
DNaseI_Duke	Melano	Dnase	30897	64679	0.477698	10049.6	666.058	31.2997	3.07446	2.35215e-215	5.88273e-212	Null_Model_OpenChrom	human
GSE62742_Histone	GM19210	H3K27AC	30795	64679	0.476121	9712.73	673.571	31.2993	3.17058	2.38731e-215	5.97066e-212	Null_Model_OpenChrom	human
DNaseI_Duke	MCF7+CTCF_shRNA_knockdown	Dnase	28596	64679	0.442122	8849.08	630.908	31.2992	3.23152	2.38975e-215	5.97675e-212	Null_Model_OpenChrom	human
Roadmapepigenomics_Dnase_narrow	A549_EtOH_0.02pct_Lung_Carcinoma	Dnase	38797	64679	0.599839	14669.5	770.867	31.2992	2.64474	2.39562e-215	5.99144e-212	Null_Model_OpenChrom	human
Roadmapepigenomics_Dnase_narrow	Fetal_Adrenal_Gland	Dnase	40120	64679	0.620294	15859.9	775.139	31.2978	2.52965	2.50223e-215	6.25807e-212	Null_Model_OpenChrom	human
Roadmapepigenomics_ActiveChromatin	CD56_Primary	2_TssAFlnk	14682	64679	0.226998	2967.34	374.315	31.2962	4.94786	2.62442e-215	6.56367e-212	Null_Model_OpenChrom	human
Roadmapepigenomics_Histone_narrow	CD4+_CD25int_CD127+_Tmem_Primary_Cellsls	H3K4me3	23265	64679	0.359699	6518.92	535.086	31.296	3.56884	2.64173e-215	6.60698e-212	Null_Model_OpenChrom	human
Roadmapepigenomics_Dnase_narrow	Fetal_Intestine_Large	Dnase	33847	64679	0.523307	12287.7	688.891	31.2957	2.75455	2.67114e-215	6.68051e-212	Null_Model_OpenChrom	human
Roadmapepigenomics_Histone_narrow	CD4+_CD25+_CD127-_Treg_Primary_CellsTh	H3K4me3	25283	64679	0.3909	7358.33	572.754	31.2956	3.43597	2.67998e-215	6.70262e-212	Null_Model_OpenChrom	human
DNaseClusters	HRE	Dnase	31979	64679	0.494426	10835.5	675.612	31.2954	2.95133	2.69327e-215	6.73588e-212	Null_Model_OpenChrom	human
DNaseI_Duke	AoSMC+serum_free_media	Dnase	30171	64679	0.466473	9997.03	644.635	31.2952	3.018	2.71182e-215	6.78225e-212	Null_Model_OpenChrom	human
DNaseI_Duke	FibroP_AG08395	Dnase	33079	64679	0.511433	11473.4	690.403	31.2941	2.8831	2.80374e-215	7.01216e-212	Null_Model_OpenChrom	human
DNaseClusters	HRCEpiC	Dnase	31894	64679	0.493112	10824.6	673.279	31.2937	2.94644	2.83909e-215	7.10056e-212	Null_Model_OpenChrom	human
DNaseClusters	HAc	Dnase	31409	64679	0.485614	10457.8	669.525	31.2927	3.00341	2.9362e-215	7.34342e-212	Null_Model_OpenChrom	human
GSE62742_Histone	GM19200	H3K27AC	31099	64679	0.480821	10476.4	659.032	31.2922	2.96847	2.9805e-215	7.45422e-212	Null_Model_OpenChrom	human
DNaseClusters	AG09319	Dnase	28002	64679	0.432938	8417.7	625.859	31.2919	3.32656	3.00852e-215	7.52431e-212	Null_Model_OpenChrom	human
DNaseI_Duke	Olf_neurosphere	Dnase	30439	64679	0.470616	10190.6	647.083	31.2918	2.98696	3.02042e-215	7.55407e-212	Null_Model_OpenChrom	human
DNaseI_Duke	Fibrobl_GM03348+lenti-control	Dnase	32894	64679	0.508573	11461.1	684.945	31.2914	2.87006	3.04995e-215	7.62792e-212	Null_Model_OpenChrom	human
GSE62742_Histone	GM18523	H3K27AC	29110	64679	0.450069	9226.72	635.438	31.2907	3.15497	3.1268e-215	7.82013e-212	Null_Model_OpenChrom	human
Roadmapepigenomics_Dnase_narrow	H1_BMP4_Derived_Mesendoderm_Cultured_Cells	Dnase	40160	64679	0.620913	16212.9	765.317	31.2904	2.47704	3.14868e-215	7.87485e-212	Null_Model_OpenChrom	human
Roadmapepigenomics_Histone_narrow	CD4+_CD25-_IL17+_PMA-Ionomcyin_stimulated_Th17_Primary_Cells	H3K4me3	23770	64679	0.367507	6864.33	540.288	31.2901	3.46283	3.17912e-215	7.95099e-212	Null_Model_OpenChrom	human
Roadmapepigenomics_ActiveChromatin	CD56_Primary	1_TssA	12206	64679	0.188717	2192.84	320.01	31.2901	5.5663	3.18029e-215	7.9539e-212	Null_Model_OpenChrom	human
DNaseClusters	WI-38	Dnase	30410	64679	0.470168	9677.88	662.584	31.2898	3.14222	3.21298e-215	8.03566e-212	Null_Model_OpenChrom	human
DNaseClusters	H1-hESC	Dnase	37876	64679	0.5856	14397.7	750.356	31.2896	2.6307	3.23293e-215	8.08556e-212	Null_Model_OpenChrom	human
DNaseClusters	PanIsletD	Dnase	33508	64679	0.518066	12064.7	685.352	31.2879	2.77735	3.40428e-215	8.51412e-212	Null_Model_OpenChrom	human
DNaseClusters	iPS	Dnase	33572	64679	0.519056	12055.9	687.69	31.2875	2.78471	3.4463e-215	8.61921e-212	Null_Model_OpenChrom	human
DNaseClusters	AoAF	Dnase	30538	64679	0.472147	10217	649.499	31.2872	2.98894	3.48548e-215	8.71719e-212	Null_Model_OpenChrom	human
Roadmapepigenomics_ActiveChromatin	CD8_Memory_Primary	1_TssA	15075	64679	0.233074	3029.31	385.007	31.2869	4.97638	3.5132e-215	8.7865e-212	Null_Model_OpenChrom	human
Roadmapepigenomics_ActiveChromatin	CD56_Primary	ActiveChromatin	35688	64679	0.551771	13347.8	714.056	31.2863	2.67369	3.58326e-215	8.96173e-212	Null_Model_OpenChrom	human
Roadmapepigenomics_Histone_narrow	CD4_Memory_Primary_Cells	H3K4me3	21696	64679	0.335441	5816.6	507.57	31.2851	3.73002	3.71707e-215	9.29639e-212	Null_Model_OpenChrom	human
Roadmapepigenomics_Histone_narrow	CD4_Naive_Primary_Cells	H3K4me3	22697	64679	0.350918	6165	528.43	31.2851	3.68159	3.71969e-215	9.30294e-212	Null_Model_OpenChrom	human
Roadmapepigenomics_Histone_narrow	CD14_Primary_Cells	H3K4me3	18999	64679	0.293743	4822.37	453.144	31.285	3.93977	3.72803e-215	9.3238e-212	Null_Model_OpenChrom	human
Roadmapepigenomics_ActiveChromatin	CD4+_CD25-_IL17-_PMA-Ionomycin_stimulated_MACS_purified_Th_Primary	1_TssA	14160	64679	0.218927	2766.88	364.198	31.2828	5.11768	4.00437e-215	1.00149e-211	Null_Model_OpenChrom	human
GSE62742_Histone	GM19140	H3K4ME1	33462	64679	0.517355	12210.2	679.375	31.2814	2.7405	4.17853e-215	1.04505e-211	Null_Model_OpenChrom	human
DNaseI_Duke	Fibrobl_GM03348+lenti-MyoD	Dnase	33330	64679	0.515314	11567.7	695.697	31.2813	2.88131	4.18454e-215	1.04655e-211	Null_Model_OpenChrom	human
Roadmapepigenomics_Histone_narrow	CD3_Primary_Cells_Cord_BI	H3K4me3	20657	64679	0.319377	5482.69	485.092	31.2813	3.76768	4.18979e-215	1.04787e-211	Null_Model_OpenChrom	human
DNaseI_Duke	Medullo_D341	Dnase	37235	64679	0.575689	14311	732.835	31.2813	2.60185	4.19086e-215	1.04813e-211	Null_Model_OpenChrom	human
Roadmapepigenomics_ActiveChromatin	CD4+_CD25-_CD45RA+_Naive_Primary	1_TssA	13599	64679	0.210254	2590.43	351.923	31.2812	5.24971	4.20943e-215	1.05278e-211	Null_Model_OpenChrom	human
DNaseClusters	8988T	Dnase	32248	64679	0.498585	11500.5	663.262	31.281	2.80406	4.2285e-215	1.05755e-211	Null_Model_OpenChrom	human
Roadmapepigenomics_Histone_narrow	Peripheral_Blood_Mononuclear_Primary_Cells	H3K4me3	20666	64679	0.319516	5578.99	482.317	31.2803	3.70425	4.32481e-215	1.08164e-211	Null_Model_OpenChrom	human
DNaseI_Duke	HeLa-S3	Dnase	33827	64679	0.522998	12277.7	688.922	31.2798	2.75517	4.39435e-215	1.09903e-211	Null_Model_OpenChrom	human
Roadmapepigenomics_ActiveChromatin	CD14_Primary	1_TssA	12114	64679	0.187294	2165.96	318.034	31.2798	5.59289	4.39527e-215	1.09926e-211	Null_Model_OpenChrom	human
Roadmapepigenomics_ActiveChromatin	CD3_Primary_Peripheral_UW	2_TssAFlnk	14751	64679	0.228065	3125.63	371.67	31.2788	4.71938	4.5374e-215	1.1348e-211	Null_Model_OpenChrom	human
DNaseClusters	SAEC	Dnase	31360	64679	0.484856	10998.4	650.979	31.2785	2.85133	4.58097e-215	1.1457e-211	Null_Model_OpenChrom	human
Roadmapepigenomics_Histone_narrow	CD8_Naive_Primary_Cells	H3K4me3	21095	64679	0.326149	5442.48	500.429	31.2782	3.87599	4.61947e-215	1.15533e-211	Null_Model_OpenChrom	human
DNaseI_Duke	FibroP_AG08396	Dnase	33966	64679	0.525147	12707.8	679.648	31.2782	2.67284	4.62095e-215	1.1557e-211	Null_Model_OpenChrom	human
DNaseI_Duke	Adult_CD4_Th1	Dnase	34978	64679	0.540794	12721.8	711.568	31.2777	2.74945	4.69279e-215	1.17367e-211	Null_Model_OpenChrom	human
Roadmapepigenomics_ActiveChromatin	CD15_Primary	1_TssA	10604	64679	0.163948	1760.43	282.756	31.2763	6.02353	4.90132e-215	1.22582e-211	Null_Model_OpenChrom	human
Roadmapepigenomics_Histone_narrow	Peripheral_Blood_Mononuclear_Primary_Cells	H3K27ac	17442	64679	0.26967	4410.57	416.68	31.2744	3.95459	5.2013e-215	1.30085e-211	Null_Model_OpenChrom	human
Roadmapepigenomics_Histone_narrow	Mobilized_CD34_Primary_Cells_Male	H3K4me3	28974	64679	0.447966	9945.83	608.432	31.2741	2.91318	5.24527e-215	1.31184e-211	Null_Model_OpenChrom	human
GSE62742_Histone	GM19127	H3K4ME1	34984	64679	0.540887	13210	696.241	31.2737	2.64831	5.31328e-215	1.32885e-211	Null_Model_OpenChrom	human
Roadmapepigenomics_Histone_narrow	CD4_Naive_Primary_Cells	H3K27ac	20041	64679	0.309853	5226.11	473.719	31.2736	3.83478	5.33893e-215	1.33527e-211	Null_Model_OpenChrom	human
DNaseClusters	Myometr	Dnase	30214	64679	0.467138	10248.7	638.434	31.2723	2.94809	5.54707e-215	1.38732e-211	Null_Model_OpenChrom	human
GSE62742_Histone	GM18859	H3K4ME1	34008	64679	0.525797	13223.3	664.696	31.2695	2.57183	6.05919e-215	1.5154e-211	Null_Model_OpenChrom	human
DNaseClusters	HGF	Dnase	26526	64679	0.410118	8515.36	575.987	31.2692	3.11508	6.12902e-215	1.53287e-211	Null_Model_OpenChrom	human
Roadmapepigenomics_Histone_narrow	CD4_Naive_Primary_Cells	H3K9ac	19507	64679	0.301597	5081.41	461.38	31.2662	3.8389	6.72072e-215	1.68085e-211	Null_Model_OpenChrom	human
DNaseI_Duke	HUVEC	Dnase	33429	64679	0.516845	12359	673.897	31.2659	2.70483	6.78472e-215	1.69686e-211	Null_Model_OpenChrom	human
GSE62742_Histone	GM19257	H3K4ME1	33871	64679	0.523678	12891.5	671.007	31.2658	2.6274	6.81821e-215	1.70523e-211	Null_Model_OpenChrom	human
GSE62742_Histone	GM19152	H3K4ME1	33457	64679	0.517278	12667.3	664.941	31.2655	2.64121	6.86865e-215	1.71785e-211	Null_Model_OpenChrom	human
DNaseClusters	AG10803	Dnase	29793	64679	0.460629	10037.4	631.877	31.2649	2.96818	7.00694e-215	1.75243e-211	Null_Model_OpenChrom	human
Roadmapepigenomics_Dnase_narrow	Fetal_Stomach	Dnase	40631	64679	0.628195	16561.1	769.871	31.2649	2.4534	7.01037e-215	1.75329e-211	Null_Model_OpenChrom	human
Roadmapepigenomics_ActiveChromatin	CD19_Primary_Cord_BI	1_TssA	10579	64679	0.163562	1846.31	279.315	31.2647	5.7298	7.05568e-215	1.76462e-211	Null_Model_OpenChrom	human
Roadmapepigenomics_Histone_narrow	CD8_Naive_Primary_Cells	H3K27ac	19686	64679	0.304365	5116.89	465.997	31.2644	3.84726	7.11178e-215	1.77866e-211	Null_Model_OpenChrom	human
DNaseClusters	HPdLF	Dnase	29237	64679	0.452032	9853.32	619.995	31.2643	2.96722	7.14525e-215	1.78703e-211	Null_Model_OpenChrom	human
DNaseI_Duke	FibroP	Dnase	32334	64679	0.499915	11654	661.463	31.264	2.77449	7.19783e-215	1.80018e-211	Null_Model_OpenChrom	human
Roadmapepigenomics_Histone_narrow	CD4+_CD25-_Th_Primary_Cells-I	H3K4me3	23529	64679	0.363781	6817.25	534.543	31.2636	3.45139	7.29366e-215	1.82414e-211	Null_Model_OpenChrom	human
Roadmapepigenomics_ActiveChromatin	CD4+_CD25+_CD127-_Treg_Primary	ActiveChromatin	30788	64679	0.476012	10755.2	640.783	31.263	2.86261	7.43768e-215	1.86016e-211	Null_Model_OpenChrom	human
Roadmapepigenomics_Histone_narrow	CD4+_CD25-_IL17-_PMA-Ionomycin_stimulated_MACS_purified_Th_Primary_Cells	H3K4me3	24982	64679	0.386246	7636.52	554.828	31.2628	3.27138	7.48001e-215	1.87075e-211	Null_Model_OpenChrom	human
DNaseI_Duke	GM12982	Dnase	39973	64679	0.618021	16561.9	748.858	31.2625	2.41356	7.56059e-215	1.8909e-211	Null_Model_OpenChrom	human
Roadmapepigenomics_Histone_narrow	CD56_Primary_Cells	H3K4me1	34784	64679	0.537794	13264.4	688.37	31.2617	2.62236	7.74634e-215	1.93736e-211	Null_Model_OpenChrom	human
GSE62742_Histone	GM19144	H3K4ME1	34259	64679	0.529677	13188	674.022	31.2616	2.59775	7.75984e-215	1.94074e-211	Null_Model_OpenChrom	human
Roadmapepigenomics_Histone_narrow	CD4+_CD25-_CD45RA+_Naive_Primary_Cellsd_	H3K4me3	24182	64679	0.373877	7128.97	545.501	31.2612	3.39208	7.85153e-215	1.96367e-211	Null_Model_OpenChrom	human
DNaseI_Duke	Cerebellum_OC	Dnase	30136	64679	0.465932	10603.9	624.805	31.2611	2.84198	7.87547e-215	1.96965e-211	Null_Model_OpenChrom	human
Roadmapepigenomics_Dnase_narrow	H1_Derived_Neuronal_Progenitor_Cultured_Cells	Dnase	37429	64679	0.578689	15132.2	713.284	31.2593	2.47347	8.33173e-215	2.08377e-211	Null_Model_OpenChrom	human
Roadmapepigenomics_Dnase_narrow	Penis_Foreskin_Melanocyte_Primary_Cells_skin01	Dnase	37632	64679	0.581827	14658.6	734.937	31.259	2.56723	8.42489e-215	2.10706e-211	Null_Model_OpenChrom	human
Roadmapepigenomics_Histone_narrow	Thymus	H3K4me3	20745	64679	0.320738	5611.07	484.157	31.2583	3.69715	8.60819e-215	2.15291e-211	Null_Model_OpenChrom	human
GSE62742_Histone	GM18855	H3K4ME1	34419	64679	0.532151	13015.3	684.743	31.258	2.6445	8.70322e-215	2.17667e-211	Null_Model_OpenChrom	human
Roadmapepigenomics_ActiveChromatin	CD4+_CD25-_CD45RA+_Naive_Primary	ActiveChromatin	32408	64679	0.501059	12451.5	638.5	31.2553	2.60274	9.45064e-215	2.36361e-211	Null_Model_OpenChrom	human
DNaseClusters	HA-h	Dnase	31926	64679	0.493607	11551.8	651.87	31.255	2.76373	9.5324e-215	2.38405e-211	Null_Model_OpenChrom	human
Roadmapepigenomics_Histone_narrow	CD4+_CD25-_CD45RO+_Memory_Primary_Cells	H3K27ac	21450	64679	0.331638	6256.96	486.129	31.2531	3.42818	1.01231e-214	2.53178e-211	Null_Model_OpenChrom	human
DNaseClusters	HBMEC	Dnase	31622	64679	0.488907	11509.8	643.554	31.2519	2.74741	1.05301e-214	2.63359e-211	Null_Model_OpenChrom	human
DNaseClusters	PanIslets	Dnase	30454	64679	0.470848	10455.2	639.943	31.2508	2.9128	1.08756e-214	2.72e-211	Null_Model_OpenChrom	human
Roadmapepigenomics_ActiveChromatin	Adipose_Nuclei	1_TssA	13103	64679	0.202585	2780.68	330.315	31.2499	4.71215	1.119e-214	2.79862e-211	Null_Model_OpenChrom	human
Roadmapepigenomics_ActiveChromatin	CD3_Primary_Peripheral_UW	ActiveChromatin	35416	64679	0.547566	13764.3	692.862	31.2496	2.57303	1.1304e-214	2.82714e-211	Null_Model_OpenChrom	human
Roadmapepigenomics_ActiveChromatin	CD4+_CD25-_IL17+_PMA-Ionomcyin_stimulated_Th17_Primary	ActiveChromatin	32423	64679	0.501291	12093.9	650.546	31.2493	2.68095	1.13946e-214	2.84979e-211	Null_Model_OpenChrom	human
Roadmapepigenomics_Dnase_narrow	Fetal_Placenta	Dnase	42592	64679	0.658514	18561.4	768.997	31.2492	2.29465	1.14348e-214	2.85984e-211	Null_Model_OpenChrom	human
Roadmapepigenomics_ActiveChromatin	CD34	1_TssA	11828	64679	0.182872	2206.71	307.892	31.2489	5.36002	1.15632e-214	2.89195e-211	Null_Model_OpenChrom	human
Roadmapepigenomics_ActiveChromatin	CD4+_CD25+_CD127-_Treg_Primary	2_TssAFlnk	15977	64679	0.24702	3774.77	390.528	31.2455	4.23257	1.28636e-214	3.21718e-211	Null_Model_OpenChrom	human
Roadmapepigenomics_ActiveChromatin	Thymus	ActiveChromatin	29221	64679	0.451785	10261	606.826	31.2445	2.84777	1.32402e-214	3.31138e-211	Null_Model_OpenChrom	human
GSE62742_Histone	GM18508	H3K4ME1	33257	64679	0.514185	12631.6	660.154	31.2433	2.63285	1.37483e-214	3.43845e-211	Null_Model_OpenChrom	human
GSE62742_Histone	GM18505	H3K4ME1	33688	64679	0.520849	13181.3	656.355	31.2433	2.55574	1.37537e-214	3.4398e-211	Null_Model_OpenChrom	human
Roadmapepigenomics_Histone_narrow	CD3_Primary_Cells_Peripheral_UWUW	H3K27ac	23376	64679	0.361416	7173.3	518.61	31.2426	3.25875	1.40886e-214	3.52356e-211	Null_Model_OpenChrom	human
Roadmapepigenomics_ActiveChromatin	CD4_Memory_Primary	ActiveChromatin	31486	64679	0.486804	11894.8	627.078	31.2421	2.64704	1.42876e-214	3.57333e-211	Null_Model_OpenChrom	human
GSE62742_Histone	GM19203	H3K4ME1	29638	64679	0.458232	10594.7	609.571	31.2405	2.79744	1.50277e-214	3.75842e-211	Null_Model_OpenChrom	human
Roadmapepigenomics_Histone_narrow	Fetal_Thymus	H3K4me3	20501	64679	0.316965	5608.48	476.71	31.2402	3.65536	1.51598e-214	3.79146e-211	Null_Model_OpenChrom	human
DNaseI_Duke	HeLa-S3+INFa4h	Dnase	34329	64679	0.53076	12900.2	685.939	31.2401	2.66113	1.51955e-214	3.80039e-211	Null_Model_OpenChrom	human
Roadmapepigenomics_ActiveChromatin	CD3_Primary_Peripheral_UW	1_TssA	12027	64679	0.185949	2178.2	315.283	31.2379	5.52153	1.62761e-214	4.07066e-211	Null_Model_OpenChrom	human
DNaseI_Duke	Stellate	Dnase	33403	64679	0.516443	12828.3	658.652	31.2375	2.60384	1.6508e-214	4.12866e-211	Null_Model_OpenChrom	human
DNaseI_Duke	NHEK	Dnase	32164	64679	0.497287	11879.9	649.364	31.2368	2.70743	1.68425e-214	4.21232e-211	Null_Model_OpenChrom	human
GSE62742_Histone	GM19223	H3K4ME1	32474	64679	0.50208	12309.6	645.542	31.2365	2.63811	1.70453e-214	4.26302e-211	Null_Model_OpenChrom	human
Roadmapepigenomics_ActiveChromatin	CD4+_CD25int_CD127+_Tmem_Primary	ActiveChromatin	28281	64679	0.437252	9498.88	601.293	31.2363	2.9773	1.71599e-214	4.29169e-211	Null_Model_OpenChrom	human
DNaseClusters	HRPEpiC	Dnase	31234	64679	0.482908	11734	624.276	31.2361	2.66183	1.72256e-214	4.30812e-211	Null_Model_OpenChrom	human
GSE62742_Histone	GM18519	H3K4ME1	32806	64679	0.507213	12779.1	641.15	31.2359	2.56715	1.73725e-214	4.34486e-211	Null_Model_OpenChrom	human
Roadmapepigenomics_ActiveChromatin	Dnd41_TCell_Leukemia	1_TssA	10925	64679	0.168911	1920.35	288.282	31.2356	5.68907	1.75269e-214	4.38347e-211	Null_Model_OpenChrom	human
DNaseI_Duke	Fibrobl	Dnase	28175	64679	0.435613	9906.82	584.853	31.2355	2.844	1.75715e-214	4.39464e-211	Null_Model_OpenChrom	human
Roadmapepigenomics_ActiveChromatin	CD8_Memory_Primary	ActiveChromatin	30136	64679	0.465932	10818.3	618.493	31.2336	2.78566	1.86689e-214	4.6691e-211	Null_Model_OpenChrom	human
Roadmapepigenomics_Histone_narrow	Dnd41_TCell_Leukemia	H3K9ac	20794	64679	0.321495	6089.32	470.812	31.2326	3.41483	1.92545e-214	4.81555e-211	Null_Model_OpenChrom	human
Roadmapepigenomics_Histone_narrow	Monocytes-CD14+_RO01746	H3K4me2	29797	64679	0.46069	10698.7	611.489	31.2325	2.78511	1.93029e-214	4.82764e-211	Null_Model_OpenChrom	human
Roadmapepigenomics_Histone_narrow	CD4+_CD25+_CD127-_Treg_Primary_CellsTh	H3K4me1	31247	64679	0.483109	11182.9	642.418	31.2322	2.79418	1.94718e-214	4.8699e-211	Null_Model_OpenChrom	human
Roadmapepigenomics_ActiveChromatin	Chondrocytes_from_Bone_Marrow_Derived_Mesenchymal_Stem_Cell	1_TssA	15088	64679	0.233275	3471.78	371.937	31.2317	4.34589	1.98057e-214	4.9534e-211	Null_Model_OpenChrom	human
BroadChromHMM	GM12878	ActivePromoter	14996	64679	0.231853	3256.54	375.885	31.2315	4.60489	1.98908e-214	4.97469e-211	Null_Model_OpenChrom	human
GSE62742_Histone	GM19119	H3K4ME1	32116	64679	0.496544	12559.1	626.196	31.2314	2.5572	1.99987e-214	5.00168e-211	Null_Model_OpenChrom	human
GSE62742_Histone	GM19128	H3K4ME1	33635	64679	0.52003	12882.3	664.531	31.2292	2.61095	2.14241e-214	5.35817e-211	Null_Model_OpenChrom	human
Roadmapepigenomics_ActiveChromatin	CD4+_CD25-_Th_Primary	2_TssAFlnk	17584	64679	0.271866	4276.47	426.126	31.2291	4.1118	2.14794e-214	5.37199e-211	Null_Model_OpenChrom	human
Roadmapepigenomics_ActiveChromatin	Fetal_Adrenal_Gland	1_TssA	12752	64679	0.197158	2634.97	323.963	31.229	4.83952	2.15587e-214	5.39184e-211	Null_Model_OpenChrom	human
Roadmapepigenomics_Histone_narrow	CD3_Primary_Cells_Peripheral_UWUW	H3K4me1	35257	64679	0.545107	14090.2	677.797	31.2288	2.50223	2.16842e-214	5.42322e-211	Null_Model_OpenChrom	human
GSE62742_Histone	GM18517	H3K4ME1	32928	64679	0.509099	12865.5	642.457	31.2278	2.5594	2.23725e-214	5.59536e-211	Null_Model_OpenChrom	human
Roadmapepigenomics_Dnase_narrow	Fetal_Muscle_Trunk	Dnase	41363	64679	0.639512	18697.3	725.823	31.2275	2.21224	2.2525e-214	5.6335e-211	Null_Model_OpenChrom	human
Roadmapepigenomics_ActiveChromatin	CD8_Naive_Primary	ActiveChromatin	31884	64679	0.492958	11882.2	640.523	31.2273	2.68335	2.26723e-214	5.67035e-211	Null_Model_OpenChrom	human
GSE62742_Histone	GM19101	H3K4ME1	30886	64679	0.477527	11845.3	609.75	31.2271	2.60745	2.28709e-214	5.72001e-211	Null_Model_OpenChrom	human
GSE62742_Histone	GM19171	H3K4ME1	33534	64679	0.518468	13420.4	644.115	31.2268	2.49873	2.30934e-214	5.77565e-211	Null_Model_OpenChrom	human
Roadmapepigenomics_Histone_narrow	Mobilized_CD34_Primary_Cells_Female	H3K4me3	24994	64679	0.386431	7978.29	544.921	31.226	3.13275	2.3634e-214	5.91085e-211	Null_Model_OpenChrom	human
Roadmapepigenomics_ActiveChromatin	CD34_Primary	2_TssAFlnk	17462	64679	0.269979	4574.57	412.716	31.2259	3.81719	2.37131e-214	5.93064e-211	Null_Model_OpenChrom	human
DNaseI_Duke	Huh-7	Dnase	35775	64679	0.553116	13459.8	714.658	31.2249	2.65791	2.44324e-214	6.11053e-211	Null_Model_OpenChrom	human
Roadmapepigenomics_Dnase_narrow	HeLa-S3_Cervical_Carcinoma	Dnase	32510	64679	0.502636	12399.6	644.057	31.2245	2.62185	2.47994e-214	6.20234e-211	Null_Model_OpenChrom	human
DNaseI_Duke	ProgFib	Dnase	32121	64679	0.496622	12018	643.829	31.2242	2.67275	2.50182e-214	6.25706e-211	Null_Model_OpenChrom	human
Roadmapepigenomics_ActiveChromatin	CD4_Naive_Primary	ActiveChromatin	31288	64679	0.483743	11304.1	640.013	31.2242	2.76784	2.50313e-214	6.26033e-211	Null_Model_OpenChrom	human
Roadmapepigenomics_ActiveChromatin	Colon_Smooth_Muscle	1_TssA	16057	64679	0.248257	4196.42	379.852	31.2242	3.82635	2.50323e-214	6.26057e-211	Null_Model_OpenChrom	human
DNaseI_Duke	PanIsletD	Dnase	32956	64679	0.509532	12509.5	654.835	31.2239	2.63449	2.52173e-214	6.30686e-211	Null_Model_OpenChrom	human
Roadmapepigenomics_ActiveChromatin	CD4+_CD25-_CD45RO+_Memory_Primary	ActiveChromatin	30808	64679	0.476322	11308.3	624.527	31.2232	2.72437	2.58382e-214	6.46213e-211	Null_Model_OpenChrom	human
Roadmapepigenomics_ActiveChromatin	CD15_Primary	2_TssAFlnk	16854	64679	0.260579	4323.35	401.33	31.2228	3.89837	2.61076e-214	6.52951e-211	Null_Model_OpenChrom	human
DNaseClusters	ProgFib	Dnase	32758	64679	0.50647	12610.9	645.283	31.2222	2.5976	2.66614e-214	6.66802e-211	Null_Model_OpenChrom	human
Roadmapepigenomics_Histone_narrow	Dnd41_TCell_Leukemia	H3K4me2	23890	64679	0.369363	7237.01	533.371	31.2221	3.30109	2.66763e-214	6.67174e-211	Null_Model_OpenChrom	human
GSE62742_Histone	GM18861	H3K4ME1	32796	64679	0.507058	12524.6	649.27	31.2218	2.61853	2.69602e-214	6.74274e-211	Null_Model_OpenChrom	human
DNaseClusters	PrEC	Dnase	26903	64679	0.415946	9411.11	560.26	31.221	2.85864	2.76038e-214	6.90371e-211	Null_Model_OpenChrom	human
Roadmapepigenomics_ActiveChromatin	CD3_Primary_Cord_BI	ActiveChromatin	30225	64679	0.467308	11665.3	594.463	31.2209	2.59101	2.77388e-214	6.93746e-211	Null_Model_OpenChrom	human
Roadmapepigenomics_Histone_narrow	CD4+_CD25int_CD127+_Tmem_Primary_Cellsls	H3K27ac	22168	64679	0.342739	6750.15	493.836	31.2206	3.28408	2.80011e-214	7.00308e-211	Null_Model_OpenChrom	human
Roadmapepigenomics_Histone_narrow	Rectal_Mucosa.Donor_29	H3K4me3	26897	64679	0.415854	9425.98	559.602	31.2204	2.8535	2.81377e-214	7.03725e-211	Null_Model_OpenChrom	human
GSE62742_Histone	GM19137	H3K4ME1	30193	64679	0.466813	11635.2	594.414	31.2203	2.59496	2.82811e-214	7.07309e-211	Null_Model_OpenChrom	human
GSE62742_Histone	GM18516	H3K4ME1	32433	64679	0.501446	12834.5	627.752	31.2201	2.52702	2.84175e-214	7.10721e-211	Null_Model_OpenChrom	human
Roadmapepigenomics_ActiveChromatin	Peripheral_Blood_Mononuclear_Primary	ActiveChromatin	26694	64679	0.412715	9111.5	563.188	31.2196	2.9297	2.88676e-214	7.2198e-211	Null_Model_OpenChrom	human
GSE62742_Histone	GM18489	H3K4ME1	33222	64679	0.513644	13225.3	640.52	31.2195	2.51201	2.89238e-214	7.23384e-211	Null_Model_OpenChrom	human
BroadChromHMM	K562	ActivePromoter	12796	64679	0.197839	2781.89	320.769	31.219	4.59974	2.94146e-214	7.3566e-211	Null_Model_OpenChrom	human
GSE62742_Histone	GM18507	H3K4ME1	33490	64679	0.517788	13050.3	654.72	31.219	2.56622	2.94302e-214	7.36049e-211	Null_Model_OpenChrom	human
GSE62742_Histone	GM19099	H3K4ME1	32651	64679	0.504816	12650.2	640.673	31.2184	2.58106	2.99785e-214	7.49763e-211	Null_Model_OpenChrom	human
Roadmapepigenomics_Dnase_narrow	HepG2_Hepatocellular_Carcinoma	Dnase	33890	64679	0.523972	13078.3	666.681	31.2169	2.59132	3.14177e-214	7.85756e-211	Null_Model_OpenChrom	human
Roadmapepigenomics_ActiveChromatin	Duodenum_Mucosa	1_TssA	16680	64679	0.257889	4163.95	400.938	31.2169	4.00581	3.14305e-214	7.86076e-211	Null_Model_OpenChrom	human
Roadmapepigenomics_Histone_narrow	CD15_Primary_Cellst_	H3K4me3	22933	64679	0.354566	6922.8	512.878	31.2164	3.31268	3.19328e-214	7.98638e-211	Null_Model_OpenChrom	human
Roadmapepigenomics_ActiveChromatin	CD34_Primary	1_TssA	10886	64679	0.168308	2038.07	283.442	31.216	5.34134	3.22725e-214	8.07135e-211	Null_Model_OpenChrom	human
Roadmapepigenomics_Dnase_narrow	Breast_vHMEC	Dnase	35732	64679	0.552451	14948.6	665.796	31.2158	2.39032	3.25052e-214	8.12955e-211	Null_Model_OpenChrom	human
GSE62742_Histone	GM18510	H3K4ME1	33616	64679	0.519736	13065.1	658.355	31.2155	2.57296	3.28025e-214	8.2039e-211	Null_Model_OpenChrom	human
Roadmapepigenomics_Histone_narrow	CD34_Cultured_Cells	H3K4me3	22346	64679	0.345491	6789.17	498.378	31.215	3.29142	3.3391e-214	8.3511e-211	Null_Model_OpenChrom	human
Roadmapepigenomics_Histone_narrow	Dnd41_TCell_Leukemia	H3K4me3	19600	64679	0.303035	5494.4	451.888	31.2148	3.56727	3.35227e-214	8.38402e-211	Null_Model_OpenChrom	human
Roadmapepigenomics_ActiveChromatin	Dnd41_TCell_Leukemia	ActiveChromatin	27404	64679	0.423692	9559.82	571.662	31.2145	2.86658	3.38183e-214	8.45796e-211	Null_Model_OpenChrom	human
GSE62742_Histone	GM19204	H3K4ME1	31167	64679	0.481872	11855.8	618.675	31.2139	2.62885	3.45449e-214	8.63968e-211	Null_Model_OpenChrom	human
Roadmapepigenomics_Histone_narrow	Peripheral_Blood_Mononuclear_Primary_Cells	H3K9ac	25962	64679	0.401398	8942.84	545.249	31.2136	2.9031	3.48671e-214	8.72025e-211	Null_Model_OpenChrom	human
DNaseClusters	HNPCEpiC	Dnase	31779	64679	0.491334	12064.8	631.601	31.2131	2.63403	3.53951e-214	8.85231e-211	Null_Model_OpenChrom	human
Roadmapepigenomics_Dnase_narrow	iPS_DF_19.11_Cell_Line	Dnase	43315	64679	0.669692	20103.2	743.667	31.2126	2.15463	3.59852e-214	8.99989e-211	Null_Model_OpenChrom	human
GSE62742_Histone	GM19116	H3K4ME1	33745	64679	0.52173	13107.1	661.23	31.2113	2.57455	3.74444e-214	9.36484e-211	Null_Model_OpenChrom	human
GSE62742_Histone	GM18909	H3K4ME1	33592	64679	0.519365	13631.4	639.552	31.2102	2.4643	3.87126e-214	9.68203e-211	Null_Model_OpenChrom	human
Roadmapepigenomics_Histone_narrow	Monocytes-CD14+_RO01746	H2A.Z	27712	64679	0.428454	9977.94	568.217	31.21	2.77733	3.89502e-214	9.74145e-211	Null_Model_OpenChrom	human
Roadmapepigenomics_Dnase_narrow	Fetal_Brain_Male	Dnase	34102	64679	0.52725	13846.7	649.005	31.2098	2.46283	3.91964e-214	9.80303e-211	Null_Model_OpenChrom	human
DNaseClusters	HVMF	Dnase	28144	64679	0.435134	9771.24	588.69	31.2096	2.88029	3.95134e-214	9.8823e-211	Null_Model_OpenChrom	human
DNaseClusters	HAEpiC	Dnase	30767	64679	0.475688	11404.3	620.416	31.2092	2.69784	3.99933e-214	1.00023e-210	Null_Model_OpenChrom	human
Roadmapepigenomics_ActiveChromatin	Bone_Marrow_Derived_Mesenchymal_Stem_Cell	1_TssA	15866	64679	0.245304	4122.45	376.285	31.2092	3.84868	4.00223e-214	1.00096e-210	Null_Model_OpenChrom	human
GSE62742_Histone	GM19147	H3K4ME1	32107	64679	0.496405	12550.5	626.629	31.2091	2.55823	4.01064e-214	1.00306e-210	Null_Model_OpenChrom	human
GSE62742_Histone	GM18862	H3K4ME1	32072	64679	0.495864	12718.8	620.126	31.2085	2.52163	4.07966e-214	1.02032e-210	Null_Model_OpenChrom	human
Roadmapepigenomics_Dnase_narrow	iPS_DF_6.9_Cell_Line	Dnase	43413	64679	0.671207	19897.3	753.504	31.2084	2.18185	4.09188e-214	1.02338e-210	Null_Model_OpenChrom	human
Roadmapepigenomics_Histone_narrow	CD34_Primary_Cells	H3K4me3	20912	64679	0.32332	6045.06	476.379	31.2082	3.45935	4.11738e-214	1.02976e-210	Null_Model_OpenChrom	human
DNaseClusters	LNCaP	Dnase	35908	64679	0.555172	14954.7	671.414	31.2077	2.40111	4.19115e-214	1.04821e-210	Null_Model_OpenChrom	human
DNaseClusters	NHDF-neo	Dnase	28567	64679	0.441673	10544.5	577.523	31.2066	2.70919	4.33295e-214	1.08367e-210	Null_Model_OpenChrom	human
GSE62742_Histone	GM19108	H3K4ME1	32040	64679	0.495369	12455.2	627.65	31.2033	2.57241	4.80031e-214	1.20056e-210	Null_Model_OpenChrom	human
Roadmapepigenomics_ActiveChromatin	Colonic_Mucosa	1_TssA	15714	64679	0.242954	3922.12	377.91	31.2029	4.00651	4.86351e-214	1.21636e-210	Null_Model_OpenChrom	human
Roadmapepigenomics_Histone_narrow	Thymus	H3K27ac	23687	64679	0.366224	7723.89	511.591	31.2029	3.06672	4.8656e-214	1.21689e-210	Null_Model_OpenChrom	human
Roadmapepigenomics_Histone_narrow	CD4+_CD25-_CD45RA+_Naive_Primary_Cellsd_	H3K27ac	23282	64679	0.359962	7460.35	507.103	31.2	3.12076	5.32016e-214	1.33057e-210	Null_Model_OpenChrom	human
Roadmapepigenomics_ActiveChromatin	CD4+_CD25-_Th_Primary	ActiveChromatin	32984	64679	0.509965	13092.6	637.549	31.1998	2.51929	5.35839e-214	1.34013e-210	Null_Model_OpenChrom	human
Roadmapepigenomics_Histone_narrow	CD4+_CD25-_Th_Primary_Cells-I	H3K4me1	33762	64679	0.521993	13618.5	645.644	31.199	2.47912	5.48957e-214	1.37294e-210	Null_Model_OpenChrom	human
Roadmapepigenomics_Histone_narrow	CD4+_CD25-_Th_Primary_Cells-I	H3K27ac	19676	64679	0.30421	5826.2	443.934	31.1979	3.37716	5.69491e-214	1.4243e-210	Null_Model_OpenChrom	human
Roadmapepigenomics_Histone_narrow	CD4+_CD25-_CD45RO+_Memory_Primary_Cells	H3K4me1	30870	64679	0.47728	11948.7	606.507	31.1972	2.58355	5.81029e-214	1.45315e-210	Null_Model_OpenChrom	human
DNaseI_Duke	Huh-7.5	Dnase	34411	64679	0.532027	14401.9	641.389	31.1965	2.38934	5.94061e-214	1.48575e-210	Null_Model_OpenChrom	human
DNaseClusters	HCFaa	Dnase	28783	64679	0.445013	10441.4	587.944	31.1962	2.75662	6.00734e-214	1.50244e-210	Null_Model_OpenChrom	human
Roadmapepigenomics_ActiveChromatin	CD4+_CD25-_IL17-_PMA-Ionomycin_stimulated_MACS_purified_Th_Primary	ActiveChromatin	34728	64679	0.536929	13891.5	667.919	31.1961	2.49994	6.01329e-214	1.50392e-210	Null_Model_OpenChrom	human
Roadmapepigenomics_ActiveChromatin	CD14_Primary	2_TssAFlnk	12905	64679	0.199524	2907.9	320.464	31.1957	4.43791	6.08667e-214	1.52228e-210	Null_Model_OpenChrom	human
BroadChromHMM	H1-hESC	ActivePromoter	10274	64679	0.158846	1943.91	267.031	31.1953	5.28523	6.17638e-214	1.54471e-210	Null_Model_OpenChrom	human
GSE62742_Histone	GM19206	H3K4ME1	34937	64679	0.54016	13701.9	680.72	31.1951	2.54979	6.21596e-214	1.55461e-210	Null_Model_OpenChrom	human
GSE62742_Histone	GM18907	H3K4ME1	31141	64679	0.48147	12267.9	605.024	31.194	2.53842	6.41983e-214	1.6056e-210	Null_Model_OpenChrom	human
GSE62742_Histone	GM19114	H3K4ME1	33418	64679	0.516675	13716.3	631.593	31.1937	2.43637	6.48908e-214	1.62292e-210	Null_Model_OpenChrom	human
Roadmapepigenomics_ActiveChromatin	Adult_Liver	1_TssA	13017	64679	0.201255	2826.16	326.711	31.1922	4.60589	6.79199e-214	1.69868e-210	Null_Model_OpenChrom	human
GSE62742_Histone	GM18912	H3K4ME1	32160	64679	0.497225	12950.6	615.841	31.1922	2.48329	6.79504e-214	1.69944e-210	Null_Model_OpenChrom	human
Roadmapepigenomics_Dnase_narrow	H1_Derived_Mesenchymal_Stem_Cells	Dnase	38327	64679	0.592573	16925.2	686.13	31.1921	2.2645	6.8161e-214	1.70471e-210	Null_Model_OpenChrom	human
Roadmapepigenomics_ActiveChromatin	A549_EtOH_0.02pct_Lung_Carcinoma	1_TssA	16815	64679	0.259976	4508.44	394.542	31.192	3.72967	6.84003e-214	1.71069e-210	Null_Model_OpenChrom	human
Roadmapepigenomics_ActiveChromatin	CD34	2_TssAFlnk	16220	64679	0.250777	4285.01	382.639	31.1913	3.78528	6.999e-214	1.75045e-210	Null_Model_OpenChrom	human
DNaseClusters	FibroP	Dnase	33931	64679	0.524606	13828.7	644.487	31.1912	2.45367	7.01001e-214	1.7532e-210	Null_Model_OpenChrom	human
BroadChromHMM	HUVEC	ActivePromoter	11811	64679	0.18261	2439.21	300.472	31.1903	4.84214	7.22073e-214	1.80591e-210	Null_Model_OpenChrom	human
GSE62742_Histone	GM19143	H3K4ME1	33822	64679	0.522921	13309.7	657.68	31.189	2.54116	7.52129e-214	1.88107e-210	Null_Model_OpenChrom	human
Roadmapepigenomics_Histone_narrow	Peripheral_Blood_Mononuclear_Primary_Cells	H3K4me1	23212	64679	0.35888	7538.34	502.555	31.1879	3.07919	7.76484e-214	1.94199e-210	Null_Model_OpenChrom	human
Roadmapepigenomics_ActiveChromatin	Fetal_Intestine_Small	1_TssA	14242	64679	0.220195	3384.28	348.145	31.1874	4.20828	7.89911e-214	1.97557e-210	Null_Model_OpenChrom	human
Roadmapepigenomics_ActiveChromatin	CD4+_CD25-_IL17+_PMA-Ionomcyin_stimulated_Th17_Primary	1_TssA	10508	64679	0.162464	1943.6	274.612	31.1873	5.40648	7.92206e-214	1.98131e-210	Null_Model_OpenChrom	human
Roadmapepigenomics_ActiveChromatin	Fetal_Intestine_Large	1_TssA	14377	64679	0.222282	3486.6	349.201	31.1866	4.1235	8.09349e-214	2.02418e-210	Null_Model_OpenChrom	human
GSE62742_Histone	GM18852	H3K4ME1	32716	64679	0.505821	13234.8	624.678	31.1861	2.47197	8.231e-214	2.05857e-210	Null_Model_OpenChrom	human
Roadmapepigenomics_ActiveChromatin	Esophagus	1_TssA	15413	64679	0.2383	3857.41	370.54	31.1858	3.99568	8.3027e-214	2.07651e-210	Null_Model_OpenChrom	human
Roadmapepigenomics_Histone_narrow	CD4+_CD25-_IL17+_PMA-Ionomcyin_stimulated_Th17_Primary_Cells	H3K27ac	22885	64679	0.353824	7034.17	508.275	31.1856	3.2534	8.36372e-214	2.09177e-210	Null_Model_OpenChrom	human
GSE62742_Histone	GM19222	H3K4ME1	33499	64679	0.517927	13541.5	639.962	31.1854	2.4738	8.39809e-214	2.10036e-210	Null_Model_OpenChrom	human
Roadmapepigenomics_ActiveChromatin	Brain_Hippocampus_Middle	1_TssA	16585	64679	0.25642	4333.61	392.86	31.1852	3.82707	8.46638e-214	2.11744e-210	Null_Model_OpenChrom	human
Roadmapepigenomics_ActiveChromatin	Brain_Anterior_Caudate	1_TssA	17801	64679	0.275221	5193.05	404.314	31.1835	3.42785	8.90664e-214	2.22755e-210	Null_Model_OpenChrom	human
Roadmapepigenomics_Histone_narrow	K562_Leukemia	H2A.Z	23226	64679	0.359096	7789.99	495.012	31.1831	2.98152	9.02718e-214	2.2577e-210	Null_Model_OpenChrom	human
Roadmapepigenomics_Histone_narrow	Fetal_Thymus	H3K27ac	25432	64679	0.393203	8946.28	528.682	31.1827	2.84274	9.14306e-214	2.28668e-210	Null_Model_OpenChrom	human
Roadmapepigenomics_ActiveChromatin	Duodenum_Smooth_Muscle	1_TssA	16798	64679	0.259713	4511.68	394.013	31.1825	3.72322	9.19488e-214	2.29964e-210	Null_Model_OpenChrom	human
Roadmapepigenomics_Dnase_narrow	Fetal_Brain_Female	Dnase	34494	64679	0.533311	14313.4	647.183	31.1823	2.40991	9.26482e-214	2.31713e-210	Null_Model_OpenChrom	human
Roadmapepigenomics_Histone_narrow	Monocytes-CD14+_RO01746	H3K4me3	27571	64679	0.426274	9879.93	567.358	31.1815	2.79061	9.48636e-214	2.37254e-210	Null_Model_OpenChrom	human
DNaseI_Duke	T-47D+Estradiol_10nM_30m	Dnase	38626	64679	0.597195	16954.6	695.014	31.1812	2.2782	9.57709e-214	2.39523e-210	Null_Model_OpenChrom	human
Roadmapepigenomics_ActiveChromatin	Brain_Substantia_Nigra	1_TssA	16438	64679	0.254147	4366.9	387.133	31.1808	3.76423	9.71032e-214	2.42855e-210	Null_Model_OpenChrom	human
DNaseClusters	AG09309	Dnase	30732	64679	0.475146	11546.8	615.309	31.1798	2.66152	1.00123e-213	2.50409e-210	Null_Model_OpenChrom	human
Roadmapepigenomics_Histone_narrow	Duodenum_Mucosa	H3K9ac	23622	64679	0.365219	8009.6	500.723	31.1797	2.94921	1.00364e-213	2.5101e-210	Null_Model_OpenChrom	human
Roadmapepigenomics_Dnase_narrow	H1_BMP4_Derived_Trophoblast_Cultured_Cells	Dnase	30793	64679	0.47609	11536	617.628	31.179	2.66929	1.02769e-213	2.57026e-210	Null_Model_OpenChrom	human
GSE62742_Histone	GM18501	H3K4ME1	32375	64679	0.500549	13311.1	611.472	31.177	2.43218	1.0921e-213	2.73134e-210	Null_Model_OpenChrom	human
Roadmapepigenomics_Histone_narrow	CD4+_CD25+_CD127-_Treg_Primary_CellsTh	H3K27ac	23188	64679	0.358509	7328.22	508.701	31.177	3.16421	1.09238e-213	2.73204e-210	Null_Model_OpenChrom	human
Roadmapepigenomics_Dnase_narrow	Fetal_Heart	Dnase	40780	64679	0.630498	18943	700.432	31.1765	2.15278	1.1097e-213	2.77536e-210	Null_Model_OpenChrom	human
GSE62742_Histone	GM18499	H3K4ME1	33228	64679	0.513737	13431.9	634.978	31.1761	2.47382	1.12458e-213	2.81258e-210	Null_Model_OpenChrom	human
GSE62742_Histone	GM19131	H3K4ME1	30778	64679	0.475858	12188.7	596.27	31.176	2.52513	1.12762e-213	2.82018e-210	Null_Model_OpenChrom	human
Roadmapepigenomics_Histone_narrow	CD4_Memory_Primary_Cells	H3K27ac	23583	64679	0.364616	8015.46	499.353	31.1754	2.94219	1.14787e-213	2.87083e-210	Null_Model_OpenChrom	human
BroadChromHMM	NHEK	ActivePromoter	13183	64679	0.203822	3070.79	324.366	31.1753	4.29303	1.15038e-213	2.8771e-210	Null_Model_OpenChrom	human
GSE62742_Histone	GM19098	H3K4ME1	31445	64679	0.48617	12660.5	602.55	31.1749	2.4837	1.16592e-213	2.91597e-210	Null_Model_OpenChrom	human
Roadmapepigenomics_ActiveChromatin	Fetal_Lung	1_TssA	13717	64679	0.212078	3183.02	337.917	31.1733	4.30943	1.22611e-213	3.0665e-210	Null_Model_OpenChrom	human
GSE62742_Histone	GM18916	H3K4ME1	33497	64679	0.517896	14133.5	621.168	31.1728	2.37005	1.2467e-213	3.118e-210	Null_Model_OpenChrom	human
Roadmapepigenomics_ActiveChromatin	CD4+_CD25-_IL17+_PMA-Ionomcyin_stimulated_Th17_Primary	2_TssAFlnk	14050	64679	0.217227	3561.4	336.481	31.1715	3.94508	1.2972e-213	3.2443e-210	Null_Model_OpenChrom	human
DNaseClusters	AG04449	Dnase	27234	64679	0.421064	9660.75	563.775	31.1707	2.81904	1.32923e-213	3.3244e-210	Null_Model_OpenChrom	human
Roadmapepigenomics_ActiveChromatin	Brain_Cingulate_Gyrus	1_TssA	16392	64679	0.253436	4372.6	385.612	31.1697	3.7488	1.37329e-213	3.43461e-210	Null_Model_OpenChrom	human
Roadmapepigenomics_Dnase_narrow	HMEC_Mammary_Epithelial	Dnase	34648	64679	0.535692	14290.7	653.121	31.1693	2.42452	1.38705e-213	3.46901e-210	Null_Model_OpenChrom	human
Roadmapepigenomics_ActiveChromatin	Fetal_Thymus	ActiveChromatin	34555	64679	0.534254	14720.8	636.338	31.1693	2.34736	1.38845e-213	3.4725e-210	Null_Model_OpenChrom	human
Roadmapepigenomics_ActiveChromatin	Brain_Germinal_Matrix	1_TssA	13138	64679	0.203126	3203.78	318.719	31.1692	4.10078	1.39513e-213	3.48923e-210	Null_Model_OpenChrom	human
Roadmapepigenomics_Dnase_narrow	Fetal_Muscle_Leg	Dnase	40709	64679	0.629401	19137.5	692.094	31.1685	2.12719	1.42626e-213	3.56708e-210	Null_Model_OpenChrom	human
DNaseClusters	HSMMtube	Dnase	38151	64679	0.589851	17404.3	665.675	31.1664	2.19204	1.52237e-213	3.80744e-210	Null_Model_OpenChrom	human
Misc_Histone	NeutrophilCells	H3K4me3	20057	64679	0.310101	6213.85	444.188	31.1651	3.22779	1.58592e-213	3.96638e-210	Null_Model_OpenChrom	human
Roadmapepigenomics_Histone_narrow	Small_Intestine	H3K4me3	17040	64679	0.263455	4841.26	391.43	31.1645	3.51975	1.61188e-213	4.03132e-210	Null_Model_OpenChrom	human
Roadmapepigenomics_Histone_narrow	Monocytes-CD14+_RO01746	H3K9ac	23457	64679	0.362668	7968.8	496.991	31.1639	2.9436	1.64151e-213	4.10543e-210	Null_Model_OpenChrom	human
GSE62742_Histone	GM19172	H3K4ME1	31591	64679	0.488427	12862.2	600.982	31.1636	2.45611	1.65706e-213	4.14431e-210	Null_Model_OpenChrom	human
GSE62742_Histone	GM18870	H3K4ME1	33345	64679	0.515546	13554.8	635.042	31.1636	2.46002	1.65711e-213	4.14444e-210	Null_Model_OpenChrom	human
Roadmapepigenomics_Histone_narrow	CD8_Naive_Primary_Cells	H3K9ac	17313	64679	0.267676	4887.57	398.73	31.1625	3.54225	1.71819e-213	4.29719e-210	Null_Model_OpenChrom	human
Roadmapepigenomics_Histone_narrow	CD8_Memory_Primary_Cells	H3K27ac	20726	64679	0.320444	6496.37	456.634	31.162	3.1904	1.74241e-213	4.35777e-210	Null_Model_OpenChrom	human
Roadmapepigenomics_Dnase_narrow	NHEK-Epidermal_Keratinocytes	Dnase	35839	64679	0.554106	15711.6	645.926	31.1605	2.28105	1.82608e-213	4.56702e-210	Null_Model_OpenChrom	human
Roadmapepigenomics_ActiveChromatin	CD34_Primary	ActiveChromatin	32420	64679	0.501245	13471.7	608.095	31.1601	2.40653	1.84999e-213	4.62684e-210	Null_Model_OpenChrom	human
Roadmapepigenomics_ActiveChromatin	CD14_Primary	ActiveChromatin	33482	64679	0.517664	14437.5	611.2	31.1592	2.31909	1.90554e-213	4.76575e-210	Null_Model_OpenChrom	human
Roadmapepigenomics_Histone_narrow	CD4+_CD25int_CD127+_Tmem_Primary_Cellsls	H3K4me1	24807	64679	0.38354	9040.78	506.004	31.1583	2.7439	1.95622e-213	4.89251e-210	Null_Model_OpenChrom	human
Roadmapepigenomics_ActiveChromatin	CD4+_CD25-_CD45RO+_Memory_Primary	2_TssAFlnk	12873	64679	0.199029	3043.16	315.484	31.1579	4.23014	1.98112e-213	4.95479e-210	Null_Model_OpenChrom	human
GSE62742_Histone	GM19141	H3K4ME1	30778	64679	0.475858	12649.4	581.842	31.1573	2.43316	2.01951e-213	5.0508e-210	Null_Model_OpenChrom	human
GSE62742_Histone	GM18520	H3K4ME1	30827	64679	0.476615	12877.8	576.094	31.1567	2.3938	2.05985e-213	5.1517e-210	Null_Model_OpenChrom	human
DNaseClusters	WI-38+4OHTAM_20nM_72hr	Dnase	29436	64679	0.455109	11295.8	582.249	31.1553	2.60592	2.14649e-213	5.36836e-210	Null_Model_OpenChrom	human
Enhancers_Hnisz2013	CD19_primary	Enhancer	15628	64679	0.241624	4218.42	366.217	31.1553	3.7047	2.15277e-213	5.38407e-210	Null_Model_OpenChrom	human
Roadmapepigenomics_ActiveChromatin	Dnd41_TCell_Leukemia	2_TssAFlnk	13480	64679	0.208414	3329.59	325.813	31.1541	4.04855	2.23081e-213	5.57925e-210	Null_Model_OpenChrom	human
Roadmapepigenomics_Histone_narrow	CD4+_CD25-_IL17+_PMA-Ionomcyin_stimulated_Th17_Primary_Cells	H3K4me1	30109	64679	0.465514	11674.8	591.714	31.154	2.57898	2.24029e-213	5.60297e-210	Null_Model_OpenChrom	human
DNaseClusters	HIPEpiC	Dnase	32033	64679	0.495261	12620.6	623.136	31.1528	2.53816	2.3247e-213	5.81406e-210	Null_Model_OpenChrom	human
Roadmapepigenomics_Histone_narrow	NHDF-Ad_Adult_Dermal_Fibroblasts	H2A.Z	18378	64679	0.284142	5566.29	411.259	31.1524	3.30166	2.3528e-213	5.88434e-210	Null_Model_OpenChrom	human
Roadmapepigenomics_Histone_narrow	Rectal_Mucosa.Donor_29	H3K9ac	22703	64679	0.35101	7520.82	487.356	31.1522	3.01869	2.37113e-213	5.93019e-210	Null_Model_OpenChrom	human
DNaseI_Duke	Cerebrum_frontal_OC	Dnase	34200	64679	0.528765	14605.8	628.985	31.1521	2.34154	2.37708e-213	5.94507e-210	Null_Model_OpenChrom	human
Roadmapepigenomics_Dnase_narrow	Fetal_Kidney	Dnase	42344	64679	0.654679	20167.6	711.875	31.152	2.0996	2.38128e-213	5.95558e-210	Null_Model_OpenChrom	human
GSE62742_Histone	GM19239	H3K4ME1	32370	64679	0.500472	12897.8	625.139	31.1486	2.50973	2.64652e-213	6.61894e-210	Null_Model_OpenChrom	human
Roadmapepigenomics_ActiveChromatin	Brain_Inferior_Temporal_Lobe	1_TssA	16742	64679	0.258848	4707.8	386.358	31.1478	3.55622	2.71715e-213	6.79558e-210	Null_Model_OpenChrom	human
GSE62742_Histone	GM18502	H3K4ME1	33167	64679	0.512794	13721.2	624.308	31.1478	2.41721	2.71983e-213	6.80229e-210	Null_Model_OpenChrom	human
BroadChromHMM	NHLF	ActivePromoter	13323	64679	0.205986	3183.17	325.546	31.1471	4.18545	2.77409e-213	6.93801e-210	Null_Model_OpenChrom	human
DNaseClusters	Medullo	Dnase	29916	64679	0.46253	11722.9	584.104	31.147	2.55193	2.7812e-213	6.95578e-210	Null_Model_OpenChrom	human
Roadmapepigenomics_Histone_narrow	Dnd41_TCell_Leukemia	H3K4me1	25035	64679	0.387065	8989.5	515.155	31.1469	2.78492	2.79086e-213	6.97994e-210	Null_Model_OpenChrom	human
GSE62742_Histone	GM19130	H3K4ME1	32097	64679	0.496251	13034.2	612.087	31.1439	2.46252	3.06655e-213	7.66943e-210	Null_Model_OpenChrom	human
GSE62742_Histone	GM18522	H3K4ME1	31558	64679	0.487917	13342.2	584.898	31.1436	2.36528	3.09566e-213	7.74226e-210	Null_Model_OpenChrom	human
Roadmapepigenomics_ActiveChromatin	ES-I3	1_TssA	15060	64679	0.232842	4205.78	348.523	31.1435	3.58079	3.10279e-213	7.76008e-210	Null_Model_OpenChrom	human
DNaseClusters	Melano	Dnase	33219	64679	0.513598	14071.4	614.828	31.1431	2.36075	3.1495e-213	7.87691e-210	Null_Model_OpenChrom	human
DNaseI_Duke	LNCap+androgen	Dnase	33198	64679	0.513273	14056.1	614.651	31.1428	2.36183	3.17707e-213	7.94586e-210	Null_Model_OpenChrom	human
Roadmapepigenomics_Histone_narrow	HepG2_Hepatocellular_Carcinoma	H2A.Z	10035	64679	0.155151	2008.15	257.744	31.1427	4.99713	3.18759e-213	7.97216e-210	Null_Model_OpenChrom	human
GSE62742_Histone	GM18858	H3K4ME1	32555	64679	0.503332	13288.8	618.655	31.1421	2.44981	3.24667e-213	8.11992e-210	Null_Model_OpenChrom	human
Roadmapepigenomics_ActiveChromatin	Brain_Dorsolateral_Prefrontal_Cortex	1_TssA	16910	64679	0.261445	4804.4	388.724	31.1419	3.51969	3.26537e-213	8.16669e-210	Null_Model_OpenChrom	human
DNaseClusters	BJ	Dnase	25713	64679	0.397548	9494.74	520.795	31.1414	2.70813	3.32007e-213	8.3035e-210	Null_Model_OpenChrom	human
GSE62742_Histone	GM19102	H3K4ME1	31528	64679	0.487453	13358.8	583.454	31.1408	2.3601	3.37656e-213	8.44477e-210	Null_Model_OpenChrom	human
GSE62742_Histone	GM19225	H3K4ME1	30372	64679	0.469581	12443.4	575.73	31.1406	2.44081	3.39592e-213	8.4932e-210	Null_Model_OpenChrom	human
Roadmapepigenomics_ActiveChromatin	Breast_vHMEC	1_TssA	13654	64679	0.211104	3320.78	331.835	31.1396	4.11168	3.50588e-213	8.7682e-210	Null_Model_OpenChrom	human
Roadmapepigenomics_ActiveChromatin	Mobilized_CD34_Primary_Female	ActiveChromatin	35702	64679	0.551988	16374.1	620.701	31.1388	2.18039	3.59822e-213	8.99915e-210	Null_Model_OpenChrom	human
Roadmapepigenomics_ActiveChromatin	CD4+_CD25-_IL17-_PMA-Ionomycin_stimulated_MACS_purified_Th_Primary	2_TssAFlnk	15488	64679	0.239459	4156.35	363.909	31.1387	3.72635	3.61e-213	9.02862e-210	Null_Model_OpenChrom	human
Roadmapepigenomics_Dnase_narrow	Fetal_Lung	Dnase	41835	64679	0.64681	20531.5	684.153	31.1384	2.0376	3.63577e-213	9.09305e-210	Null_Model_OpenChrom	human
Enhancers_Hnisz2013	CD20	Enhancer	23848	64679	0.368713	8550.62	491.277	31.138	2.78904	3.68813e-213	9.22401e-210	Null_Model_OpenChrom	human
DNaseI_Duke	Heart_OC	Dnase	33105	64679	0.511835	13730.6	622.212	31.138	2.41105	3.68819e-213	9.22416e-210	Null_Model_OpenChrom	human
Roadmapepigenomics_Histone_narrow	Left_Ventricle	H3K4me3	18074	64679	0.279442	5479.47	404.477	31.1378	3.29849	3.71155e-213	9.2826e-210	Null_Model_OpenChrom	human
Roadmapepigenomics_Histone_narrow	Duodenum_Mucosa	H3K4me3	26339	64679	0.407226	9585.12	538.062	31.1374	2.74791	3.75157e-213	9.38267e-210	Null_Model_OpenChrom	human
GSE62742_Histone	GM19240	H3K4ME1	31921	64679	0.49353	13429.7	593.864	31.1372	2.37689	3.77792e-213	9.44857e-210	Null_Model_OpenChrom	human
DNaseClusters	Caco-2	Dnase	21603	64679	0.334003	7377.06	456.895	31.1361	2.9284	3.90749e-213	9.77262e-210	Null_Model_OpenChrom	human
Roadmapepigenomics_ActiveChromatin	Fetal_Heart	1_TssA	10628	64679	0.164319	2324.72	266.683	31.1354	4.57172	4.00039e-213	1.0005e-209	Null_Model_OpenChrom	human
Roadmapepigenomics_ActiveChromatin	Fetal_Brain_Female	1_TssA	14864	64679	0.229812	3997.19	349.019	31.1353	3.71861	4.00974e-213	1.00284e-209	Null_Model_OpenChrom	human
Roadmapepigenomics_Histone_narrow	NHLF_Lung_Fibroblasts	H2A.Z	18893	64679	0.292104	5943.13	415.931	31.1347	3.17896	4.08924e-213	1.02272e-209	Null_Model_OpenChrom	human
GSE62742_Histone	GM19209	H3K4ME1	32366	64679	0.50041	13364.7	610.303	31.1343	2.42176	4.14236e-213	1.036e-209	Null_Model_OpenChrom	human
DNaseI_Duke	HSMM_FSHD	Dnase	32787	64679	0.506919	13843.2	608.485	31.1327	2.36846	4.34318e-213	1.08623e-209	Null_Model_OpenChrom	human
Roadmapepigenomics_Histone_narrow	Sigmoid_Colon	H3K4me3	17422	64679	0.269361	5067.36	396.84	31.1325	3.43808	4.36941e-213	1.09279e-209	Null_Model_OpenChrom	human
Roadmapepigenomics_Histone_narrow	K562_Leukemia	H3K4me3	19897	64679	0.307627	6420.67	432.873	31.1323	3.0989	4.40281e-213	1.10114e-209	Null_Model_OpenChrom	human
GSE62742_Histone	GM18504	H3K4ME1	32697	64679	0.505527	13602.8	613.34	31.1316	2.4037	4.50623e-213	1.12701e-209	Null_Model_OpenChrom	human
Roadmapepigenomics_Histone_narrow	Dnd41_TCell_Leukemia	H3K27ac	21889	64679	0.338425	7374.19	466.242	31.1315	2.96833	4.51755e-213	1.12984e-209	Null_Model_OpenChrom	human
GSE62742_Histone	GM18913	H3K4ME1	31520	64679	0.48733	13070	592.683	31.1296	2.41162	4.79573e-213	1.19941e-209	Null_Model_OpenChrom	human
Roadmapepigenomics_Dnase_narrow	Psoas_Muscle	Dnase	37947	64679	0.586697	17756.2	648.607	31.1294	2.13711	4.81298e-213	1.20373e-209	Null_Model_OpenChrom	human
Roadmapepigenomics_ActiveChromatin	Adipose_Derived_Mesenchymal_Stem_Cell	1_TssA	16820	64679	0.260053	4756.06	387.541	31.1294	3.53654	4.81552e-213	1.20436e-209	Null_Model_OpenChrom	human
Roadmapepigenomics_Histone_narrow	Fetal_Kidney	H3K4me3	17484	64679	0.27032	5184.87	395.125	31.1272	3.37212	5.16533e-213	1.29185e-209	Null_Model_OpenChrom	human
Roadmapepigenomics_Histone_narrow	Fetal_Muscle_Leg	H3K4me3	18584	64679	0.287327	5869.65	408.47	31.1268	3.16612	5.22951e-213	1.3079e-209	Null_Model_OpenChrom	human
Roadmapepigenomics_Histone_narrow	HeLa-S3_Cervical_Carcinoma	H2A.Z	19711	64679	0.304751	6183.32	434.608	31.1262	3.18777	5.33011e-213	1.33306e-209	Null_Model_OpenChrom	human
Roadmapepigenomics_Dnase_narrow	Ovary	Dnase	36421	64679	0.563104	16117.9	652.29	31.1259	2.25966	5.37402e-213	1.34404e-209	Null_Model_OpenChrom	human
Roadmapepigenomics_Histone_narrow	Fetal_Placenta	H3K4me3	17417	64679	0.269284	4964.9	400.058	31.1258	3.50803	5.3952e-213	1.34934e-209	Null_Model_OpenChrom	human
Roadmapepigenomics_Histone_narrow	Rectal_Mucosa.Donor_31	H3K4me3	23097	64679	0.357102	8097.35	481.906	31.1257	2.85242	5.41257e-213	1.35368e-209	Null_Model_OpenChrom	human
Roadmapepigenomics_Histone_narrow	CD4+_CD25-_IL17-_PMA-Ionomycin_stimulated_MACS_purified_Th_Primary_Cells	H3K4me1	33024	64679	0.510583	13954.5	612.67	31.1252	2.36655	5.49056e-213	1.37319e-209	Null_Model_OpenChrom	human
GSE62742_Histone	GM18486	H3K4ME1	30153	64679	0.466195	12700	560.739	31.1249	2.37425	5.54006e-213	1.38557e-209	Null_Model_OpenChrom	human
BroadChromHMM	HSMM	ActivePromoter	12431	64679	0.192195	2847.54	307.908	31.1244	4.36553	5.62686e-213	1.40728e-209	Null_Model_OpenChrom	human
Roadmapepigenomics_Histone_narrow	CD8_Naive_Primary_Cells	H3K4me1	29072	64679	0.449481	11882.9	552.281	31.1239	2.44655	5.7226e-213	1.43122e-209	Null_Model_OpenChrom	human
DNaseClusters	HMEC	Dnase	37414	64679	0.578457	17988	624.161	31.1234	2.07994	5.8098e-213	1.45303e-209	Null_Model_OpenChrom	human
Roadmapepigenomics_Histone_narrow	K562_Leukemia	H3K4me2	23593	64679	0.364771	8429.3	487.229	31.1223	2.79893	6.01236e-213	1.50369e-209	Null_Model_OpenChrom	human
Roadmapepigenomics_ActiveChromatin	4star	1_TssA	14231	64679	0.220025	3597.71	341.667	31.1218	3.95557	6.10661e-213	1.52726e-209	Null_Model_OpenChrom	human
GSE62742_Histone	GM19159	H3K4ME1	30978	64679	0.47895	13059.4	575.757	31.1218	2.37208	6.1163e-213	1.52969e-209	Null_Model_OpenChrom	human
Roadmapepigenomics_ActiveChromatin	CD19_Primary_Peripheral_UW	7_Enh	22674	64679	0.350562	7950.39	473.115	31.1206	2.85194	6.3489e-213	1.58786e-209	Null_Model_OpenChrom	human
Roadmapepigenomics_Histone_narrow	Fetal_Intestine_Large	H3K4me3	19027	64679	0.294176	6224.39	411.389	31.1204	3.05684	6.37443e-213	1.59424e-209	Null_Model_OpenChrom	human
Roadmapepigenomics_Histone_narrow	Spleen	H3K27ac	27509	64679	0.425316	11043.6	529.11	31.119	2.49094	6.66542e-213	1.66702e-209	Null_Model_OpenChrom	human
Roadmapepigenomics_ActiveChromatin	Mobilized_CD34_Primary_Male	ActiveChromatin	37241	64679	0.575782	17432.9	636.528	31.1189	2.13625	6.68009e-213	1.67069e-209	Null_Model_OpenChrom	human
Roadmapepigenomics_ActiveChromatin	ES-WA7	1_TssA	14785	64679	0.22859	4004.33	346.44	31.1184	3.69225	6.79026e-213	1.69824e-209	Null_Model_OpenChrom	human
GSE62742_Histone	GM18853	H3K4ME1	30518	64679	0.471838	12641.5	574.471	31.1183	2.41412	6.81907e-213	1.70545e-209	Null_Model_OpenChrom	human
Roadmapepigenomics_ActiveChromatin	Brain_Angular_Gyrus	1_TssA	16810	64679	0.259899	4749.85	387.57	31.1173	3.53906	7.02406e-213	1.75672e-209	Null_Model_OpenChrom	human
Roadmapepigenomics_Histone_narrow	Monocytes-CD14+_RO01746	H3K4me1	32739	64679	0.506177	14772.8	577.373	31.1172	2.21617	7.0475e-213	1.76258e-209	Null_Model_OpenChrom	human
Roadmapepigenomics_ActiveChromatin	Breast_Myoepithelial	1_TssA	15623	64679	0.241547	4298.51	363.932	31.117	3.63452	7.08569e-213	1.77213e-209	Null_Model_OpenChrom	human
Roadmapepigenomics_Dnase_narrow	Penis_Foreskin_Keratinocyte_Primary_Cells_skin02	Dnase	35666	64679	0.551431	16706.2	609.314	31.1166	2.13489	7.19189e-213	1.79869e-209	Null_Model_OpenChrom	human
Roadmapepigenomics_Histone_narrow	Aorta	H3K4me3	16222	64679	0.250808	4659.39	371.599	31.1158	3.48157	7.35691e-213	1.83996e-209	Null_Model_OpenChrom	human
GSE62742_Histone	GM18871	H3K4ME1	31619	64679	0.48886	13504.4	582.19	31.1147	2.34139	7.62452e-213	1.90689e-209	Null_Model_OpenChrom	human
Roadmapepigenomics_Histone_narrow	CD4+_CD25-_CD45RA+_Naive_Primary_Cellsd_	H3K4me1	29587	64679	0.457444	12108.5	561.754	31.1142	2.44349	7.74263e-213	1.93643e-209	Null_Model_OpenChrom	human
DNaseClusters	pHTE	Dnase	34276	64679	0.52994	15267.8	610.922	31.1139	2.24498	7.81741e-213	1.95513e-209	Null_Model_OpenChrom	human
Roadmapepigenomics_Histone_narrow	H1_BMP4_Derived_Mesendoderm_Cultured_Cells	H3K4me3	15411	64679	0.238269	4331.31	356.12	31.1123	3.55805	8.21257e-213	2.05396e-209	Null_Model_OpenChrom	human
DNaseI_Duke	IMR90	Dnase	33298	64679	0.514819	14218.4	613.255	31.112	2.3419	8.28896e-213	2.07307e-209	Null_Model_OpenChrom	human
Roadmapepigenomics_Histone_narrow	Psoas_Muscle	H3K4me3	18330	64679	0.2834	5918.67	398.934	31.1112	3.09698	8.48666e-213	2.12251e-209	Null_Model_OpenChrom	human
Roadmapepigenomics_Histone_narrow	Colonic_Mucosa	H3K4me3	23378	64679	0.361447	8433.15	480.373	31.1109	2.77216	8.56732e-213	2.14269e-209	Null_Model_OpenChrom	human
Roadmapepigenomics_Histone_narrow	CD4+_CD25-_IL17-_PMA-Ionomycin_stimulated_MACS_purified_Th_Primary_Cells	H3K27ac	26291	64679	0.406484	9934.48	525.762	31.1101	2.64644	8.7843e-213	2.19695e-209	Null_Model_OpenChrom	human
Roadmapepigenomics_Histone_narrow	Pancreatic_Islets	H3K9ac	16795	64679	0.259667	4993.49	379.347	31.11	3.36338	8.80914e-213	2.20317e-209	Null_Model_OpenChrom	human
Roadmapepigenomics_ActiveChromatin	CD15_Primary	ActiveChromatin	29257	64679	0.452342	11876.8	558.673	31.1098	2.46338	8.86188e-213	2.21636e-209	Null_Model_OpenChrom	human
Roadmapepigenomics_Histone_narrow	Fetal_Adrenal_Gland	H3K4me3	18875	64679	0.291826	5930.41	416.093	31.1098	3.18275	8.86879e-213	2.21808e-209	Null_Model_OpenChrom	human
Roadmapepigenomics_ActiveChromatin	CD8_Naive_Primary	2_TssAFlnk	12293	64679	0.190062	2911.13	301.584	31.1086	4.22276	9.2013e-213	2.30124e-209	Null_Model_OpenChrom	human
Roadmapepigenomics_Histone_narrow	CD14_Primary_Cells	H3K27ac	19529	64679	0.301937	6147.83	430.147	31.1084	3.17657	9.27009e-213	2.31845e-209	Null_Model_OpenChrom	human
Roadmapepigenomics_ActiveChromatin	Rectal_Mucosa.Donor_29	ActiveChromatin	29590	64679	0.45749	12627	545.287	31.1084	2.34339	9.28516e-213	2.32222e-209	Null_Model_OpenChrom	human
GSE62742_Histone	GM19093	H3K4ME1	30362	64679	0.469426	12516.8	573.65	31.1081	2.42569	9.35346e-213	2.3393e-209	Null_Model_OpenChrom	human
Roadmapepigenomics_Histone_narrow	Mobilized_CD34_Primary_Cells_Female	H3K4me1	36598	64679	0.565841	17097	626.907	31.1067	2.14061	9.77995e-213	2.44597e-209	Null_Model_OpenChrom	human
Roadmapepigenomics_Histone_narrow	ES-WA7_Cell_Line	H3K9ac	9477	64679	0.146524	1868.12	244.609	31.1062	5.07301	9.91913e-213	2.48077e-209	Null_Model_OpenChrom	human
Roadmapepigenomics_Histone_narrow	Fetal_Muscle_Trunk	H3K4me3	17733	64679	0.274169	5463.49	394.469	31.1038	3.24573	1.06834e-212	2.67192e-209	Null_Model_OpenChrom	human
Roadmapepigenomics_ActiveChromatin	Aorta	1_TssA	16210	64679	0.250622	4755.96	368.264	31.1027	3.40835	1.10552e-212	2.7649e-209	Null_Model_OpenChrom	human
GSE62742_Histone	GM19201	H3K4ME1	30907	64679	0.477852	13075.3	573.34	31.1015	2.36378	1.149e-212	2.87365e-209	Null_Model_OpenChrom	human
Roadmapepigenomics_Histone_narrow	Brain_Anterior_Caudate	H3K4me3	24327	64679	0.376119	9281.45	483.759	31.1014	2.62104	1.15398e-212	2.88611e-209	Null_Model_OpenChrom	human
Roadmapepigenomics_ActiveChromatin	CD4+_CD25-_IL17+_PMA-Ionomcyin_stimulated_Th17_Primary	3_TxFlnk	9477	64679	0.146524	1884.98	244.12	31.0995	5.02763	1.22358e-212	3.06016e-209	Null_Model_OpenChrom	human
BroadChromHMM	HepG2	ActivePromoter	12778	64679	0.19756	3191.98	308.242	31.099	4.00316	1.2407e-212	3.10299e-209	Null_Model_OpenChrom	human
Roadmapepigenomics_Histone_narrow	Mobilized_CD34_Primary_Cells_Female	H3K27ac	22691	64679	0.350825	8187.11	466.384	31.0986	2.77155	1.25678e-212	3.14322e-209	Null_Model_OpenChrom	human
Roadmapepigenomics_ActiveChromatin	CD4+_CD25-_CD45RA+_Naive_Primary	2_TssAFlnk	14606	64679	0.225823	3913.18	343.84	31.0983	3.73251	1.27156e-212	3.18017e-209	Null_Model_OpenChrom	human
Roadmapepigenomics_Histone_narrow	CD15_Primary_Cellst_	H3K4me1	28536	64679	0.441194	11526.4	547.011	31.0956	2.47572	1.37959e-212	3.45035e-209	Null_Model_OpenChrom	human
Roadmapepigenomics_ActiveChromatin	Monocytes-CD14+_RO01746	ActiveChromatin	33244	64679	0.513984	14325.2	608.409	31.0956	2.32067	1.38208e-212	3.45659e-209	Null_Model_OpenChrom	human
GSE62742_Histone	GM19153	H3K4ME1	32104	64679	0.496359	13824.4	587.863	31.0949	2.32227	1.41018e-212	3.52687e-209	Null_Model_OpenChrom	human
Roadmapepigenomics_Histone_narrow	CD4_Naive_Primary_Cells	H3K4me1	26364	64679	0.407613	10612.4	506.565	31.0949	2.48426	1.41257e-212	3.53284e-209	Null_Model_OpenChrom	human
Roadmapepigenomics_Histone_narrow	Placenta_Amnion	H3K4me3	16413	64679	0.253761	4800.37	373.458	31.0949	3.41911	1.4134e-212	3.53491e-209	Null_Model_OpenChrom	human
GSE62742_Histone	GM19190	H3K4ME1	30865	64679	0.477203	13339.4	563.625	31.0944	2.31382	1.43261e-212	3.58295e-209	Null_Model_OpenChrom	human
Roadmapepigenomics_Histone_narrow	Brain_Hippocampus_Middle	H3K4me3	24079	64679	0.372285	9394.91	472.244	31.0943	2.56298	1.43721e-212	3.59447e-209	Null_Model_OpenChrom	human
Roadmapepigenomics_Histone_narrow	Adult_Liver	H3K9ac	21536	64679	0.332967	7600.38	448.18	31.0938	2.83354	1.45974e-212	3.65081e-209	Null_Model_OpenChrom	human
Roadmapepigenomics_Histone_narrow	Stomach_Mucosa	H3K4me3	18207	64679	0.281498	5709.99	401.92	31.0933	3.18862	1.48316e-212	3.70937e-209	Null_Model_OpenChrom	human
DNaseClusters	HSMM	Dnase	35604	64679	0.550472	16723.1	607.261	31.0919	2.12903	1.54797e-212	3.87149e-209	Null_Model_OpenChrom	human
GSE62742_Histone	GM18856	H3K4ME1	30920	64679	0.478053	13133.7	572.055	31.0918	2.35424	1.55224e-212	3.88215e-209	Null_Model_OpenChrom	human
GSE62742_Histone	GM19138	H3K4ME1	31660	64679	0.489494	13791.6	574.697	31.0918	2.29559	1.55465e-212	3.88818e-209	Null_Model_OpenChrom	human
Roadmapepigenomics_Histone_narrow	Rectal_Smooth_Muscle	H3K4me3	24365	64679	0.376707	9081.32	491.582	31.0908	2.68298	1.60397e-212	4.01152e-209	Null_Model_OpenChrom	human
BroadChromHMM	HMEC	ActivePromoter	11907	64679	0.184094	2756.56	294.324	31.0897	4.31952	1.66038e-212	4.1526e-209	Null_Model_OpenChrom	human
DNaseClusters	NHDF-Ad	Dnase	30084	64679	0.465128	12538.5	564.358	31.0893	2.39933	1.67975e-212	4.20106e-209	Null_Model_OpenChrom	human
Roadmapepigenomics_Histone_narrow	IMR90_Cell_Line	H3K4me3	19446	64679	0.300654	6294.02	423.042	31.0891	3.0896	1.6921e-212	4.23194e-209	Null_Model_OpenChrom	human
Roadmapepigenomics_Histone_narrow	Fetal_Kidney	H3K9ac	16200	64679	0.250468	4696.65	370.014	31.0889	3.44926	1.70053e-212	4.25303e-209	Null_Model_OpenChrom	human
GSE62742_Histone	GM18511	H3K4ME1	30320	64679	0.468777	12582.2	570.581	31.0872	2.40975	1.79326e-212	4.48495e-209	Null_Model_OpenChrom	human
Roadmapepigenomics_Histone_narrow	Rectal_Mucosa.Donor_31	H3K9ac	23504	64679	0.363395	8602.44	479.362	31.0862	2.73225	1.84775e-212	4.62122e-209	Null_Model_OpenChrom	human
Roadmapepigenomics_Histone_narrow	Right_Atrium	H3K4me3	19394	64679	0.29985	6498.84	414.828	31.0855	2.98423	1.88836e-212	4.72279e-209	Null_Model_OpenChrom	human
GSE62742_Histone	GM19092	H3K4ME1	30587	64679	0.472905	12837.4	571.06	31.0819	2.38265	2.11639e-212	5.2931e-209	Null_Model_OpenChrom	human
GSE62742_Histone	GM19207	H3K4ME1	30437	64679	0.470586	13184.1	555.081	31.0817	2.30861	2.12787e-212	5.3218e-209	Null_Model_OpenChrom	human
Roadmapepigenomics_Histone_narrow	Fetal_Intestine_Small	H3K4me3	19390	64679	0.299788	6468.44	415.734	31.0813	2.99763	2.15334e-212	5.38551e-209	Null_Model_OpenChrom	human
Roadmapepigenomics_Dnase_narrow	IMR90_Cell_Line	Dnase	36836	64679	0.56952	17331.3	627.541	31.0811	2.1254	2.16779e-212	5.42164e-209	Null_Model_OpenChrom	human
Roadmapepigenomics_Histone_narrow	Brain_Substantia_Nigra	H3K4me3	21819	64679	0.337343	7793.55	451.258	31.0808	2.79962	2.18857e-212	5.47361e-209	Null_Model_OpenChrom	human
Roadmapepigenomics_Histone_narrow	Brain_Mid_Frontal_Lobe	H3K9ac	22809	64679	0.352649	8564.3	458.326	31.0798	2.66327	2.25486e-212	5.63942e-209	Null_Model_OpenChrom	human
DNaseI_Duke	H1-hESC	Dnase	33217	64679	0.513567	14480.2	602.881	31.0788	2.29397	2.32693e-212	5.81964e-209	Null_Model_OpenChrom	human
Roadmapepigenomics_Histone_narrow	Brain_Angular_Gyrus	H3K4me3	21704	64679	0.335565	7697.21	450.7	31.0778	2.81972	2.40054e-212	6.00374e-209	Null_Model_OpenChrom	human
Roadmapepigenomics_ActiveChromatin	CD3_Primary_Cord_BI	2_TssAFlnk	13615	64679	0.210501	3692.97	319.282	31.0761	3.68673	2.53718e-212	6.3455e-209	Null_Model_OpenChrom	human
Roadmapepigenomics_Histone_narrow	Mobilized_CD34_Primary_Cells_Male	H3K4me1	34975	64679	0.540747	16299.3	601.004	31.0742	2.1458	2.68976e-212	6.72708e-209	Null_Model_OpenChrom	human
DNaseClusters	SKMC	Dnase	28625	64679	0.44257	11662.5	545.871	31.0742	2.45444	2.69103e-212	6.73026e-209	Null_Model_OpenChrom	human
Roadmapepigenomics_Histone_narrow	Adipose_Nuclei	H3K4me3	23623	64679	0.365234	8895.75	473.969	31.0722	2.65554	2.85975e-212	7.15223e-209	Null_Model_OpenChrom	human
Roadmapepigenomics_ActiveChromatin	CD34	ActiveChromatin	33967	64679	0.525163	15700.6	587.886	31.0713	2.16341	2.94292e-212	7.36024e-209	Null_Model_OpenChrom	human
Roadmapepigenomics_Histone_narrow	H9_Cell_Line	H2A.Z	17641	64679	0.272747	5415.86	393.478	31.0695	3.25728	3.11458e-212	7.78958e-209	Null_Model_OpenChrom	human
DNaseI_Duke	Myometr	Dnase	31297	64679	0.483882	13509.8	572.511	31.0687	2.31661	3.18926e-212	7.97634e-209	Null_Model_OpenChrom	human
Roadmapepigenomics_Histone_narrow	Pancreas	H3K4me3	18351	64679	0.283724	5823.36	403.228	31.0684	3.15127	3.21797e-212	8.04814e-209	Null_Model_OpenChrom	human
Roadmapepigenomics_Histone_narrow	NHLF_Lung_Fibroblasts	H3K4me3	17598	64679	0.272082	5506.13	389.206	31.068	3.19607	3.25463e-212	8.13983e-209	Null_Model_OpenChrom	human
DNaseI_Duke	pHTC	Dnase	31661	64679	0.48951	13702.5	578.059	31.0669	2.31061	3.36771e-212	8.42265e-209	Null_Model_OpenChrom	human
Roadmapepigenomics_Histone_narrow	Fetal_Thymus	H3K4me1	34112	64679	0.527405	16046.9	581.52	31.0653	2.12577	3.54005e-212	8.85367e-209	Null_Model_OpenChrom	human
Roadmapepigenomics_Histone_narrow	H9_Derived_Neuronal_Progenitor_Cultured_Cells	H2A.Z	26283	64679	0.406361	11188.9	485.902	31.0641	2.34903	3.67695e-212	9.19606e-209	Null_Model_OpenChrom	human
Roadmapepigenomics_Histone_narrow	Brain_Cingulate_Gyrus	H3K4me3	22594	64679	0.349325	8399.23	456.964	31.0632	2.69001	3.78332e-212	9.46209e-209	Null_Model_OpenChrom	human
Roadmapepigenomics_Histone_narrow	A549_EtOH_0.02pct_Lung_Carcinoma	H2A.Z	21974	64679	0.339739	7789.56	456.634	31.063	2.82096	3.80571e-212	9.51809e-209	Null_Model_OpenChrom	human
Roadmapepigenomics_Histone_narrow	Esophagus	H3K4me3	18826	64679	0.291068	6037.86	411.684	31.063	3.11799	3.81059e-212	9.53029e-209	Null_Model_OpenChrom	human
Roadmapepigenomics_Histone_narrow	Pancreatic_Islets	H3K4me3	17674	64679	0.273257	5374.39	395.972	31.0618	3.28856	3.95096e-212	9.88135e-209	Null_Model_OpenChrom	human
Roadmapepigenomics_Histone_narrow	HSMM_Skeletal_Muscle_Myoblasts	H2A.Z	21746	64679	0.336214	8057.93	440.686	31.0608	2.69871	4.07635e-212	1.0195e-208	Null_Model_OpenChrom	human
Roadmapepigenomics_ActiveChromatin	CD4+_CD25-_CD45RA+_Naive_Primary	3_TxFlnk	6357	64679	0.0982854	1085	169.741	31.0592	5.85897	4.29158e-212	1.07332e-208	Null_Model_OpenChrom	human
Roadmapepigenomics_Histone_narrow	Penis_Foreskin_Keratinocyte_Primary_Cells_skin02	H3K4me3	20212	64679	0.312497	7452.15	410.842	31.0578	2.71224	4.47722e-212	1.11975e-208	Null_Model_OpenChrom	human
GSE62742_Histone	GM18498	H3K4ME1	32800	64679	0.50712	14699.9	582.802	31.057	2.2313	4.58939e-212	1.14781e-208	Null_Model_OpenChrom	human
Misc_Histone	NeutrophilCells	H3K27ac	16791	64679	0.259605	5303.79	369.905	31.0545	3.16585	4.96398e-212	1.24149e-208	Null_Model_OpenChrom	human
Roadmapepigenomics_Histone_narrow	Brain_Inferior_Temporal_Lobe	H3K4me3	23093	64679	0.35704	8633.63	465.615	31.0543	2.67477	4.98741e-212	1.24735e-208	Null_Model_OpenChrom	human
Roadmapepigenomics_Dnase_narrow	HSMMtube_Skeletal_Muscle_Myotubes_Derived_from_HSMM	Dnase	41253	64679	0.637811	21406.8	639.105	31.053	1.9271	5.18899e-212	1.29777e-208	Null_Model_OpenChrom	human
DNaseI_Duke	Panislets	Dnase	30847	64679	0.476925	13718.8	551.591	31.0524	2.24853	5.2944e-212	1.32413e-208	Null_Model_OpenChrom	human
Roadmapepigenomics_Histone_narrow	Penis_Foreskin_Melanocyte_Primary_Cells_skin01	H3K4me3	19434	64679	0.300468	6650.04	411.692	31.0522	2.92239	5.31973e-212	1.33046e-208	Null_Model_OpenChrom	human
Roadmapepigenomics_Histone_narrow	Brain_Substantia_Nigra	H3K9ac	23314	64679	0.360457	8761.9	468.663	31.0503	2.66084	5.65994e-212	1.41555e-208	Null_Model_OpenChrom	human
Roadmapepigenomics_Histone_narrow	Adult_Liver	H3K4me3	19976	64679	0.308848	6790.34	424.682	31.0483	2.94182	6.01084e-212	1.50331e-208	Null_Model_OpenChrom	human
DNaseI_Duke	Monocytes_CD14+	Dnase	33485	64679	0.517711	15650	574.434	31.0479	2.13961	6.08147e-212	1.52097e-208	Null_Model_OpenChrom	human
Roadmapepigenomics_Histone_narrow	Colonic_Mucosa	H3K9ac	22025	64679	0.340528	8096.33	448.624	31.0475	2.72037	6.16501e-212	1.54187e-208	Null_Model_OpenChrom	human
GSE62742_Histone	GM19210	H3K4ME1	28620	64679	0.442493	12195.9	529.018	31.0464	2.34669	6.38827e-212	1.59771e-208	Null_Model_OpenChrom	human
DNaseI_Duke	HMEC	Dnase	32050	64679	0.495524	14296.7	571.833	31.0463	2.24178	6.39519e-212	1.59944e-208	Null_Model_OpenChrom	human
Roadmapepigenomics_Histone_narrow	HUVEC_Umbilical_Vein_Endothelial_Cells	H2A.Z	23119	64679	0.357442	8542.59	469.509	31.0461	2.70632	6.44782e-212	1.6126e-208	Null_Model_OpenChrom	human
Roadmapepigenomics_Histone_narrow	HMEC_Mammary_Epithelial	H3K4me3	18410	64679	0.284636	6052.34	398.068	31.0441	3.0418	6.85341e-212	1.71404e-208	Null_Model_OpenChrom	human
GSE62742_Histone	GM19160	H3K4ME1	27232	64679	0.421033	11555.7	504.97	31.044	2.35658	6.87871e-212	1.72037e-208	Null_Model_OpenChrom	human
Roadmapepigenomics_Histone_narrow	Rectal_Smooth_Muscle	H3K9ac	18351	64679	0.283724	6091.6	394.92	31.0427	3.01251	7.1492e-212	1.78802e-208	Null_Model_OpenChrom	human
Roadmapepigenomics_Histone_narrow	Sigmoid_Colon	H3K27ac	28054	64679	0.433742	12204.3	510.597	31.0415	2.29869	7.43692e-212	1.85997e-208	Null_Model_OpenChrom	human
Roadmapepigenomics_Histone_narrow	Skeletal_Muscle_Male	H3K4me3	22181	64679	0.34294	8373.83	444.803	31.0411	2.64885	7.52791e-212	1.88273e-208	Null_Model_OpenChrom	human
DNaseI_Duke	iPS	Dnase	33793	64679	0.522473	15911.3	576.067	31.041	2.12383	7.55683e-212	1.88996e-208	Null_Model_OpenChrom	human
Roadmapepigenomics_Histone_narrow	H1_BMP4_Derived_Mesendoderm_Cultured_Cells	H3K4me2	16097	64679	0.248875	4947.18	359.2	31.0407	3.25377	7.62175e-212	1.9062e-208	Null_Model_OpenChrom	human
Roadmapepigenomics_Histone_narrow	Brain_Mid_Frontal_Lobe	H3K4me3	22437	64679	0.346898	8330.14	454.477	31.0398	2.69347	7.83159e-212	1.95868e-208	Null_Model_OpenChrom	human
Roadmapepigenomics_Histone_narrow	Stomach_Mucosa	H3K9ac	23275	64679	0.359854	9074.42	457.533	31.0373	2.5649	8.47273e-212	2.11903e-208	Null_Model_OpenChrom	human
Roadmapepigenomics_Histone_narrow	NHLF_Lung_Fibroblasts	H3K9ac	16899	64679	0.261275	5419.35	369.885	31.0357	3.11827	8.88772e-212	2.22282e-208	Null_Model_OpenChrom	human
Roadmapepigenomics_Histone_narrow	H1_BMP4_Derived_Trophoblast_Cultured_Cells	H3K4me2	18415	64679	0.284714	6254.38	391.853	31.0337	2.94434	9.4783e-212	2.37052e-208	Null_Model_OpenChrom	human
Roadmapepigenomics_Histone_narrow	H9_Derived_Neuronal_Progenitor_Cultured_Cells	H3K4me3	17479	64679	0.270242	5760.06	377.636	31.0324	3.03452	9.86854e-212	2.46812e-208	Null_Model_OpenChrom	human
Roadmapepigenomics_Histone_narrow	Lung	H3K4me3	17489	64679	0.270397	5726.41	379.046	31.0321	3.05409	9.95859e-212	2.49064e-208	Null_Model_OpenChrom	human
Roadmapepigenomics_Histone_narrow	Penis_Foreskin_Melanocyte_Primary_Cells_skin03	H3K4me3	19429	64679	0.300391	6417.66	419.288	31.032	3.02743	9.98073e-212	2.49618e-208	Null_Model_OpenChrom	human
Roadmapepigenomics_Histone_narrow	Fetal_Stomach	H3K4me3	18854	64679	0.291501	6243.16	406.384	31.0318	3.01995	1.00409e-211	2.51122e-208	Null_Model_OpenChrom	human
Roadmapepigenomics_Histone_narrow	Brain_Cingulate_Gyrus	H3K9ac	25141	64679	0.388704	10057.2	486.077	31.0317	2.4998	1.00627e-211	2.51669e-208	Null_Model_OpenChrom	human
Roadmapepigenomics_Histone_narrow	HUVEC_Umbilical_Vein_Endothelial_Cells	H3K4me3	18919	64679	0.292506	6435.49	402.287	31.0313	2.93979	1.01951e-211	2.5498e-208	Null_Model_OpenChrom	human
GSE62742_Histone	GM19200	H3K4ME1	31161	64679	0.481779	13954.2	554.521	31.03	2.23309	1.06203e-211	2.65615e-208	Null_Model_OpenChrom	human
DNaseClusters	Hepatocytes	Dnase	24336	64679	0.376258	9737.85	470.454	31.0299	2.49912	1.0645e-211	2.66232e-208	Null_Model_OpenChrom	human
Roadmapepigenomics_Histone_narrow	Duodenum_Smooth_Muscle	H3K4me3	23225	64679	0.359081	8941.8	460.342	31.0274	2.59735	1.15249e-211	2.88237e-208	Null_Model_OpenChrom	human
Roadmapepigenomics_Histone_narrow	CD4_Memory_Primary_Cells	H3K4me1	27871	64679	0.430913	11603	524.351	31.025	2.40204	1.2422e-211	3.10673e-208	Null_Model_OpenChrom	human
Roadmapepigenomics_Histone_narrow	IMR90_Cell_Line	H2A.Z	21499	64679	0.332395	7967.34	436.155	31.0249	2.69839	1.24392e-211	3.11104e-208	Null_Model_OpenChrom	human
Roadmapepigenomics_ActiveChromatin	CD4_Naive_Primary	2_TssAFlnk	12281	64679	0.189876	3262.21	290.706	31.0237	3.76462	1.29075e-211	3.22817e-208	Null_Model_OpenChrom	human
Roadmapepigenomics_Histone_narrow	Fetal_Brain_Male	H3K4me3	11806	64679	0.182532	3041.98	282.502	31.0229	3.88103	1.32477e-211	3.31324e-208	Null_Model_OpenChrom	human
DNaseI_Duke	HSMM	Dnase	31647	64679	0.489293	14306.7	558.963	31.0223	2.21204	1.35069e-211	3.37808e-208	Null_Model_OpenChrom	human
Roadmapepigenomics_Histone_narrow	Right_Ventricle	H3K4me3	19554	64679	0.302324	6910.06	407.582	31.0218	2.82979	1.36797e-211	3.42128e-208	Null_Model_OpenChrom	human
Roadmapepigenomics_ActiveChromatin	Duodenum_Mucosa	ActiveChromatin	31987	64679	0.49455	14969.7	548.59	31.0201	2.13678	1.44522e-211	3.6145e-208	Null_Model_OpenChrom	human
Roadmapepigenomics_Histone_narrow	4star	H3K4me3	17600	64679	0.272113	6216.21	366.985	31.0198	2.83131	1.45749e-211	3.64517e-208	Null_Model_OpenChrom	human
Roadmapepigenomics_Histone_narrow	Ovary	H3K4me3	18035	64679	0.278839	5956.92	389.367	31.0198	3.02757	1.45864e-211	3.64806e-208	Null_Model_OpenChrom	human
DNaseClusters	Chorion	Dnase	26314	64679	0.40684	10657.4	504.73	31.0197	2.46908	1.46144e-211	3.65507e-208	Null_Model_OpenChrom	human
Roadmapepigenomics_Histone_narrow	Breast_vHMEC	H3K4me3	16553	64679	0.255925	5198.43	366.051	31.0191	3.18423	1.48832e-211	3.72229e-208	Null_Model_OpenChrom	human
Roadmapepigenomics_ActiveChromatin	CD4+_CD25int_CD127+_Tmem_Primary	2_TssAFlnk	11107	64679	0.171725	2797.56	267.889	31.0182	3.97024	1.53324e-211	3.83463e-208	Null_Model_OpenChrom	human
Roadmapepigenomics_Dnase_narrow	NHDF-Ad_Adult_Dermal_Fibroblasts	Dnase	37581	64679	0.581039	19498	582.99	31.0178	1.92743	1.55276e-211	3.88345e-208	Null_Model_OpenChrom	human
Roadmapepigenomics_Histone_narrow	iPS_DF_6.9_Cell_Line	H3K4me3	16985	64679	0.262605	5332.61	375.694	31.0157	3.18512	1.65723e-211	4.14473e-208	Null_Model_OpenChrom	human
DNaseI_Duke	H7-hESC	Dnase	33964	64679	0.525116	16315.1	569.039	31.0153	2.08175	1.67796e-211	4.19658e-208	Null_Model_OpenChrom	human
Roadmapepigenomics_Histone_narrow	NHDF-Ad_Adult_Dermal_Fibroblasts	H3K4me3	17469	64679	0.270088	5641.69	381.339	31.0152	3.09642	1.68147e-211	4.20537e-208	Null_Model_OpenChrom	human
DNaseI_Duke	Frontal_cortex_OC	Dnase	30556	64679	0.472425	13742.1	542.153	31.0133	2.22354	1.78616e-211	4.46718e-208	Null_Model_OpenChrom	human
Roadmapepigenomics_Histone_narrow	NH-A_Astrocytes	H2A.Z	22343	64679	0.345444	8329.96	451.847	31.0128	2.68225	1.81223e-211	4.53238e-208	Null_Model_OpenChrom	human
DNaseI_Duke	8988T	Dnase	32030	64679	0.495215	14803.5	555.465	31.0127	2.16368	1.81459e-211	4.53829e-208	Null_Model_OpenChrom	human
Roadmapepigenomics_Histone_narrow	Osteoblasts	H2A.Z	23692	64679	0.366301	9684.67	451.666	31.0126	2.44634	1.82464e-211	4.56342e-208	Null_Model_OpenChrom	human
Roadmapepigenomics_Histone_narrow	Brain_Angular_Gyrus	H3K9ac	24606	64679	0.380433	9904.53	474.05	31.0125	2.48432	1.8293e-211	4.57509e-208	Null_Model_OpenChrom	human
Roadmapepigenomics_Histone_narrow	K562_Leukemia	H3K9ac	17846	64679	0.275916	5815.97	387.935	31.0105	3.06845	1.94771e-211	4.87122e-208	Null_Model_OpenChrom	human
Roadmapepigenomics_Histone_narrow	CD8_Memory_Primary_Cells	H3K4me1	24350	64679	0.376475	9941	464.661	31.0097	2.44945	1.99362e-211	4.98605e-208	Null_Model_OpenChrom	human
Roadmapepigenomics_Histone_narrow	CD14_Primary_Cells	H3K4me1	29159	64679	0.450826	12738.3	529.572	31.0075	2.28908	2.13582e-211	5.34169e-208	Null_Model_OpenChrom	human
DNaseI_Duke	T-47D	Dnase	36093	64679	0.558033	17598.1	596.504	31.0056	2.05097	2.2662e-211	5.66776e-208	Null_Model_OpenChrom	human
Roadmapepigenomics_Histone_narrow	Fetal_Lung	H3K4me3	19128	64679	0.295737	6634.6	402.946	31.0051	2.88307	2.29724e-211	5.74541e-208	Null_Model_OpenChrom	human
Roadmapepigenomics_Histone_narrow	Brain_Anterior_Caudate	H3K9ac	26240	64679	0.405696	10990.4	491.867	31.0035	2.38754	2.41911e-211	6.05019e-208	Null_Model_OpenChrom	human
DNaseI_Duke	Hsmmtube	Dnase	32024	64679	0.495122	15097	545.98	31.0029	2.12121	2.46214e-211	6.15781e-208	Null_Model_OpenChrom	human
Enhancers_Hnisz2013	GM12878	Enhancer	15304	64679	0.236615	4794.91	338.974	31.0027	3.19172	2.48243e-211	6.20855e-208	Null_Model_OpenChrom	human
Roadmapepigenomics_Histone_narrow	CD34_Primary_Cells	H3K4me1	22992	64679	0.355479	8821.39	457.083	31.0023	2.60639	2.50947e-211	6.27618e-208	Null_Model_OpenChrom	human
DNaseClusters	NHLF	Dnase	27558	64679	0.426073	11794.8	508.462	31.0017	2.33645	2.55534e-211	6.39091e-208	Null_Model_OpenChrom	human
Roadmapepigenomics_Histone_narrow	Rectal_Mucosa.Donor_29	H3K27ac	27964	64679	0.432351	12146.4	510.227	31.0012	2.30225	2.59823e-211	6.49817e-208	Null_Model_OpenChrom	human
Roadmapepigenomics_Histone_narrow	GM12878_Lymphoblastoid	H3K4me1	22541	64679	0.348506	8534.93	451.814	30.9996	2.64103	2.7269e-211	6.81998e-208	Null_Model_OpenChrom	human
Roadmapepigenomics_Histone_narrow	Skeletal_Muscle_Female	H3K4me3	23278	64679	0.3599	9200.97	454.105	30.9995	2.52995	2.73772e-211	6.84705e-208	Null_Model_OpenChrom	human
Roadmapepigenomics_Dnase_narrow	Penis_Foreskin_Fibroblast_Primary_Cells_skin02	Dnase	38731	64679	0.598819	20033.7	603.156	30.9991	1.9333	2.76748e-211	6.92148e-208	Null_Model_OpenChrom	human
Roadmapepigenomics_Histone_narrow	H9_Cell_Line	H3K4me3	19050	64679	0.294531	6755.11	396.647	30.9971	2.82009	2.95227e-211	7.38362e-208	Null_Model_OpenChrom	human
Roadmapepigenomics_Histone_narrow	Brain_Germinal_Matrix	H3K4me3	18831	64679	0.291146	6780.07	388.794	30.9956	2.7774	3.08698e-211	7.72053e-208	Null_Model_OpenChrom	human
Roadmapepigenomics_Histone_narrow	HepG2_Hepatocellular_Carcinoma	H3K4me3	20997	64679	0.324634	7896.81	422.672	30.9937	2.65892	3.27523e-211	8.19136e-208	Null_Model_OpenChrom	human
Roadmapepigenomics_Histone_narrow	Penis_Foreskin_Keratinocyte_Primary_Cells_skin03	H3K4me3	21107	64679	0.326335	8167.45	417.502	30.9928	2.58428	3.36767e-211	8.42254e-208	Null_Model_OpenChrom	human
Roadmapepigenomics_Histone_narrow	HeLa-S3_Cervical_Carcinoma	H3K4me3	20734	64679	0.320568	7880.52	414.726	30.9927	2.63105	3.38131e-211	8.45665e-208	Null_Model_OpenChrom	human
Misc_Histone	NeutrophilCells	H3K4me1	30692	64679	0.474528	14032.8	537.523	30.9925	2.18716	3.40036e-211	8.50429e-208	Null_Model_OpenChrom	human
Roadmapepigenomics_Histone_narrow	NHEK-Epidermal_Keratinocytes	H2A.Z	21598	64679	0.333926	8430.27	424.882	30.9915	2.56196	3.50752e-211	8.77231e-208	Null_Model_OpenChrom	human
Roadmapepigenomics_Histone_narrow	Colon_Smooth_Muscle	H3K4me3	21469	64679	0.331932	8104.27	431.242	30.9912	2.6491	3.53848e-211	8.84974e-208	Null_Model_OpenChrom	human
Roadmapepigenomics_Histone_narrow	Stomach_Smooth_Muscle	H3K4me3	24626	64679	0.380742	10265	463.392	30.9911	2.39903	3.55377e-211	8.88797e-208	Null_Model_OpenChrom	human
Roadmapepigenomics_Histone_narrow	K562_Leukemia	H3K27ac	17828	64679	0.275638	6239.21	373.944	30.9907	2.85741	3.59456e-211	8.99e-208	Null_Model_OpenChrom	human
Roadmapepigenomics_Histone_narrow	Neurosphere_Cultured_Cells_Cortex_Derived	H3K4me3	18700	64679	0.28912	6407.62	396.651	30.9904	2.9184	3.62863e-211	9.07519e-208	Null_Model_OpenChrom	human
Roadmapepigenomics_ActiveChromatin	Adipose_Nuclei	2_TssAFlnk	16273	64679	0.251596	5143.12	359.167	30.9881	3.16403	3.90146e-211	9.75756e-208	Null_Model_OpenChrom	human
GSE62742_Histone	GM19238	H3K4ME1	30522	64679	0.4719	13639.9	544.803	30.9876	2.23771	3.95823e-211	9.89954e-208	Null_Model_OpenChrom	human
Roadmapepigenomics_Histone_narrow	ES-I3_Cell_Line	H3K9ac	21301	64679	0.329334	8314.73	419.089	30.9869	2.56184	4.0491e-211	1.01268e-207	Null_Model_OpenChrom	human
Roadmapepigenomics_Histone_narrow	CD34_Cultured_Cells	H3K4me1	30426	64679	0.470415	14442.3	515.893	30.9826	2.10673	4.62751e-211	1.15734e-207	Null_Model_OpenChrom	human
Roadmapepigenomics_Histone_narrow	hESC_Derived_CD56+_Mesoderm_Cultured_Cells	H3K4me3	17612	64679	0.272299	6095.2	371.747	30.9802	2.88949	4.98519e-211	1.2468e-207	Null_Model_OpenChrom	human
Roadmapepigenomics_ActiveChromatin	CD4_Memory_Primary	2_TssAFlnk	11705	64679	0.180971	3098.92	277.808	30.9786	3.77712	5.24134e-211	1.31086e-207	Null_Model_OpenChrom	human
Roadmapepigenomics_Histone_narrow	H1_BMP4_Derived_Mesendoderm_Cultured_Cells	H3K9ac	18691	64679	0.288981	6774.16	384.694	30.9774	2.75916	5.42988e-211	1.35801e-207	Null_Model_OpenChrom	human
DNaseClusters	NH-A	Dnase	26333	64679	0.407134	11099.1	491.774	30.9774	2.37253	5.44178e-211	1.36099e-207	Null_Model_OpenChrom	human
Roadmapepigenomics_Histone_narrow	Chondrocytes_from_Bone_Marrow_Derived_Mesenchymal_Stem_Cell_Cultured_Cells	H3K4me3	23208	64679	0.358818	9303.31	448.897	30.9753	2.4946	5.80692e-211	1.45231e-207	Null_Model_OpenChrom	human
Roadmapepigenomics_Histone_narrow	Brain_Inferior_Temporal_Lobe	H3K9ac	26391	64679	0.40803	11166.3	491.536	30.9738	2.36346	6.08351e-211	1.52149e-207	Null_Model_OpenChrom	human
Roadmapepigenomics_Histone_narrow	H9_Derived_Neuron_Cultured_Cells	H3K4me3	17478	64679	0.270227	5916.88	373.256	30.9737	2.95392	6.08808e-211	1.52263e-207	Null_Model_OpenChrom	human
DNaseI_Duke	Medullo	Dnase	28943	64679	0.447487	13030.6	513.765	30.9722	2.22116	6.3862e-211	1.59719e-207	Null_Model_OpenChrom	human
Roadmapepigenomics_Dnase_narrow	HSMM_Skeletal_Muscle_Myoblasts	Dnase	36497	64679	0.564279	18581.9	578.429	30.972	1.96412	6.42188e-211	1.60611e-207	Null_Model_OpenChrom	human
Roadmapepigenomics_ActiveChromatin	Fetal_Brain_Male	1_TssA	9461	64679	0.146276	2221.07	233.774	30.9698	4.25966	6.87861e-211	1.72034e-207	Null_Model_OpenChrom	human
Roadmapepigenomics_Histone_narrow	Rectal_Mucosa.Donor_31	H3K27ac	24559	64679	0.379706	10847.1	442.78	30.9678	2.26411	7.30694e-211	1.82746e-207	Null_Model_OpenChrom	human
Roadmapepigenomics_Dnase_narrow	Penis_Foreskin_Fibroblast_Primary_Cells_skin01	Dnase	39541	64679	0.611342	20854.9	603.412	30.9673	1.896	7.43161e-211	1.85864e-207	Null_Model_OpenChrom	human
Roadmapepigenomics_Histone_narrow	H1_BMP4_Derived_Trophoblast_Cultured_Cells	H3K4me3	17067	64679	0.263872	6017.51	356.828	30.9659	2.83623	7.76428e-211	1.94185e-207	Null_Model_OpenChrom	human
Roadmapepigenomics_Histone_narrow	HSMM_Skeletal_Muscle_Myoblasts	H3K4me3	19129	64679	0.295753	6727.32	400.523	30.9637	2.84348	8.31245e-211	2.07894e-207	Null_Model_OpenChrom	human
Roadmapepigenomics_Histone_narrow	H9_Cell_Line	H3K4me2	21462	64679	0.331823	8428.53	420.989	30.9592	2.54635	9.55699e-211	2.3902e-207	Null_Model_OpenChrom	human
Roadmapepigenomics_Dnase_narrow	NHLF_Lung_Fibroblasts	Dnase	35035	64679	0.541675	18101.1	546.984	30.9587	1.93552	9.70183e-211	2.42643e-207	Null_Model_OpenChrom	human
BroadChromHMM	GM12878	StrongEnhancer	14432	64679	0.223133	4407.95	323.806	30.957	3.27409	1.02348e-210	2.55974e-207	Null_Model_OpenChrom	human
Roadmapepigenomics_Histone_narrow	ES-WA7_Cell_Line	H3K4me3	16811	64679	0.259914	5845.46	354.259	30.9535	2.87591	1.13987e-210	2.85082e-207	Null_Model_OpenChrom	human
Roadmapepigenomics_Histone_narrow	Stomach_Smooth_Muscle	H3K9ac	18697	64679	0.289074	6615.5	390.318	30.953	2.82624	1.15788e-210	2.89585e-207	Null_Model_OpenChrom	human
BroadChromHMM	H1-hESC	WeakPromoter	11936	64679	0.184542	3312.66	278.6	30.9524	3.60315	1.17778e-210	2.94563e-207	Null_Model_OpenChrom	human
Roadmapepigenomics_ActiveChromatin	Sigmoid_Colon	ActiveChromatin	25015	64679	0.386756	10996.8	452.902	30.9519	2.27475	1.19791e-210	2.99596e-207	Null_Model_OpenChrom	human
Roadmapepigenomics_Histone_narrow	Osteoblasts	H3K4me3	22790	64679	0.352355	9246.59	437.609	30.9487	2.46469	1.32269e-210	3.30805e-207	Null_Model_OpenChrom	human
DNaseClusters	HA-sp	Dnase	24879	64679	0.384653	10351.4	469.425	30.9476	2.40344	1.36913e-210	3.42418e-207	Null_Model_OpenChrom	human
Roadmapepigenomics_Histone_narrow	HMEC_Mammary_Epithelial	H2A.Z	24660	64679	0.381267	10522.2	456.839	30.9469	2.34361	1.39636e-210	3.49231e-207	Null_Model_OpenChrom	human
Roadmapepigenomics_Histone_narrow	H1_Cell_Line	H3K4me3	18386	64679	0.284265	6529.08	383.154	30.9456	2.81602	1.45629e-210	3.64219e-207	Null_Model_OpenChrom	human
Roadmapepigenomics_Histone_narrow	A549_EtOH_0.02pct_Lung_Carcinoma	H3K9ac	22621	64679	0.349743	9392.53	427.503	30.9435	2.4084	1.55226e-210	3.8822e-207	Null_Model_OpenChrom	human
Roadmapepigenomics_Histone_narrow	HeLa-S3_Cervical_Carcinoma	H3K4me2	22159	64679	0.3426	9144.83	420.595	30.9422	2.42312	1.61544e-210	4.04021e-207	Null_Model_OpenChrom	human
Roadmapepigenomics_Histone_narrow	HSMMtube_Skeletal_Muscle_Myotubes_Derived_from_HSMM	H3K4me3	19561	64679	0.302432	7682.66	383.89	30.942	2.54612	1.626e-210	4.06663e-207	Null_Model_OpenChrom	human
Roadmapepigenomics_Histone_narrow	Gastric	H3K4me3	17691	64679	0.27352	5995.98	377.978	30.941	2.95048	1.67766e-210	4.19583e-207	Null_Model_OpenChrom	human
Roadmapepigenomics_Histone_narrow	H1_Derived_Neuronal_Progenitor_Cultured_Cells	H3K4me3	16976	64679	0.262465	5942.81	356.618	30.9384	2.85656	1.81961e-210	4.55085e-207	Null_Model_OpenChrom	human
GSE62742_Histone	GM18523	H3K4ME1	27967	64679	0.432397	12686.1	493.945	30.9365	2.20454	1.93195e-210	4.83181e-207	Null_Model_OpenChrom	human
Roadmapepigenomics_Histone_narrow	hESC_Derived_CD56+_Ectoderm_Cultured_Cells	H3K4me3	18272	64679	0.282503	6641.46	376.022	30.9304	2.7512	2.32777e-210	5.82175e-207	Null_Model_OpenChrom	human
Roadmapepigenomics_Histone_narrow	HUES48_Cell_Line	H3K9ac	15822	64679	0.244623	5367.5	338.014	30.9292	2.94774	2.42002e-210	6.05248e-207	Null_Model_OpenChrom	human
Roadmapepigenomics_Histone_narrow	H1_Derived_Mesenchymal_Stem_Cells	H3K4me2	21271	64679	0.32887	8630.89	408.697	30.9278	2.46452	2.52694e-210	6.31987e-207	Null_Model_OpenChrom	human
DNaseI_Duke	Psoas_muscle_OC	Dnase	31274	64679	0.483526	15494.3	510.241	30.9261	2.01842	2.66667e-210	6.66934e-207	Null_Model_OpenChrom	human
Roadmapepigenomics_Histone_narrow	Neurosphere_Cultured_Cells_Ganglionic_Eminence_Derived	H3K4me3	20671	64679	0.319594	7979.44	410.386	30.9259	2.59053	2.68128e-210	6.70589e-207	Null_Model_OpenChrom	human
Roadmapepigenomics_Histone_narrow	HUVEC_Umbilical_Vein_Endothelial_Cells	H3K9ac	19085	64679	0.295073	7401.18	377.824	30.924	2.57864	2.84297e-210	7.11026e-207	Null_Model_OpenChrom	human
Roadmapepigenomics_ActiveChromatin	Rectal_Mucosa.Donor_31	ActiveChromatin	28776	64679	0.444905	13423.9	496.503	30.9205	2.14364	3.16669e-210	7.91988e-207	Null_Model_OpenChrom	human
Roadmapepigenomics_ActiveChromatin	Colonic_Mucosa	ActiveChromatin	25401	64679	0.392724	10982.4	466.374	30.9163	2.31288	3.60151e-210	9.00737e-207	Null_Model_OpenChrom	human
Roadmapepigenomics_Histone_narrow	HepG2_Hepatocellular_Carcinoma	H3K4me2	24103	64679	0.372656	10256.5	447.906	30.914	2.35003	3.87746e-210	9.69753e-207	Null_Model_OpenChrom	human
DNaseI_Duke	LNCap	Dnase	30607	64679	0.473214	14378.2	524.991	30.9125	2.1287	4.06153e-210	1.01579e-206	Null_Model_OpenChrom	human
Roadmapepigenomics_Histone_narrow	Colon_Smooth_Muscle	H3K9ac	16694	64679	0.258105	5912.01	348.799	30.9118	2.82374	4.14588e-210	1.03688e-206	Null_Model_OpenChrom	human
Roadmapepigenomics_Histone_narrow	Monocytes-CD14+_RO01746	H3K27ac	26465	64679	0.409175	11814	473.975	30.911	2.24015	4.24612e-210	1.06195e-206	Null_Model_OpenChrom	human
Roadmapepigenomics_Histone_narrow	Adipose_Nuclei	H3K9ac	21710	64679	0.335658	9008.22	410.944	30.9087	2.41002	4.55609e-210	1.13948e-206	Null_Model_OpenChrom	human
Roadmapepigenomics_Histone_narrow	A549_EtOH_0.02pct_Lung_Carcinoma	H3K4me2	26232	64679	0.405572	11918.7	463.093	30.908	2.20091	4.66513e-210	1.16675e-206	Null_Model_OpenChrom	human
Roadmapepigenomics_Histone_narrow	Breast_Myoepithelial_Cells	H3K4me3	19919	64679	0.307967	7636.69	397.394	30.9071	2.60833	4.7885e-210	1.1976e-206	Null_Model_OpenChrom	human
Roadmapepigenomics_Histone_narrow	HeLa-S3_Cervical_Carcinoma	H3K9ac	19530	64679	0.301953	7571.5	386.926	30.9064	2.57941	4.89311e-210	1.22377e-206	Null_Model_OpenChrom	human
Roadmapepigenomics_Histone_narrow	iPS-15b_Cell_Line	H3K4me3	20941	64679	0.323768	8515.05	402.068	30.9051	2.45929	5.10375e-210	1.27645e-206	Null_Model_OpenChrom	human
Roadmapepigenomics_Histone_narrow	HUES64_Cell_Line	H3K4me3	20020	64679	0.309529	7844.17	393.988	30.904	2.55221	5.27318e-210	1.31882e-206	Null_Model_OpenChrom	human
Roadmapepigenomics_Histone_narrow	Muscle_Satellite_Cultured_Cells	H3K4me3	20930	64679	0.323598	8537.83	401.019	30.9017	2.45144	5.66213e-210	1.4161e-206	Null_Model_OpenChrom	human
Roadmapepigenomics_Histone_narrow	HepG2_Hepatocellular_Carcinoma	H3K9ac	17646	64679	0.272824	6448.62	362.373	30.9002	2.7364	5.93777e-210	1.48504e-206	Null_Model_OpenChrom	human
Roadmapepigenomics_Histone_narrow	NHDF-Ad_Adult_Dermal_Fibroblasts	H3K9ac	16019	64679	0.247669	5534.46	339.32	30.8987	2.89441	6.22517e-210	1.55691e-206	Null_Model_OpenChrom	human
Roadmapepigenomics_Histone_narrow	Thymus	H3K4me1	19049	64679	0.294516	7236.77	382.309	30.8971	2.63225	6.54216e-210	1.63619e-206	Null_Model_OpenChrom	human
Roadmapepigenomics_Histone_narrow	H1_Cell_Line	H3K9ac	16590	64679	0.256497	5947.49	344.454	30.8967	2.78941	6.61432e-210	1.65424e-206	Null_Model_OpenChrom	human
Roadmapepigenomics_Histone_narrow	iPS-18_Cell_Line	H3K9ac	17785	64679	0.274973	6628.43	361.097	30.8963	2.68314	6.69783e-210	1.67513e-206	Null_Model_OpenChrom	human
Roadmapepigenomics_ActiveChromatin	Fetal_Muscle_Leg	1_TssA	6818	64679	0.105413	1427.45	174.482	30.8946	4.77636	7.04731e-210	1.76253e-206	Null_Model_OpenChrom	human
Roadmapepigenomics_Histone_narrow	H9_Derived_Neuron_Cultured_Cells	H2A.Z	18672	64679	0.288687	6939.09	379.803	30.8921	2.69084	7.63471e-210	1.90944e-206	Null_Model_OpenChrom	human
Roadmapepigenomics_Histone_narrow	Small_Intestine	H3K27ac	28005	64679	0.432984	12877.4	489.716	30.8906	2.17474	7.98396e-210	1.99679e-206	Null_Model_OpenChrom	human
Roadmapepigenomics_Histone_narrow	HSMM_Skeletal_Muscle_Myoblasts	H3K9ac	16635	64679	0.257193	6074.27	341.876	30.8906	2.7386	7.99873e-210	2.00048e-206	Null_Model_OpenChrom	human
Roadmapepigenomics_Histone_narrow	Colonic_Mucosa	H3K27ac	24301	64679	0.375717	10700.2	440.297	30.89	2.27107	8.14553e-210	2.0372e-206	Null_Model_OpenChrom	human
Roadmapepigenomics_Histone_narrow	Fetal_Brain_Female	H3K4me3	19250	64679	0.297624	7155.91	391.533	30.889	2.69008	8.38234e-210	2.09642e-206	Null_Model_OpenChrom	human
Roadmapepigenomics_Histone_narrow	H1_Derived_Mesenchymal_Stem_Cells	H2A.Z	20716	64679	0.320289	8583.74	392.811	30.8857	2.4134	9.28874e-210	2.32311e-206	Null_Model_OpenChrom	human
Roadmapepigenomics_Histone_narrow	HUES6_Cell_Line	H3K4me3	20919	64679	0.323428	8680.26	396.286	30.8836	2.40995	9.9076e-210	2.47789e-206	Null_Model_OpenChrom	human
Roadmapepigenomics_ActiveChromatin	Small_Intestine	ActiveChromatin	21327	64679	0.329736	8892.67	402.664	30.8802	2.39827	1.10278e-209	2.75806e-206	Null_Model_OpenChrom	human
Roadmapepigenomics_Histone_narrow	HUES64_Cell_Line	H3K9ac	18078	64679	0.279503	6995.47	358.896	30.8795	2.58424	1.12455e-209	2.8125e-206	Null_Model_OpenChrom	human
Roadmapepigenomics_Histone_narrow	H1_BMP4_Derived_Trophoblast_Cultured_Cells	H3K9ac	11032	64679	0.170565	3137.14	255.674	30.8786	3.51658	1.15911e-209	2.89893e-206	Null_Model_OpenChrom	human
Roadmapepigenomics_Dnase_narrow	NH-A_Astrocytes	Dnase	34304	64679	0.530373	17887	531.754	30.8734	1.91782	1.36077e-209	3.40328e-206	Null_Model_OpenChrom	human
Roadmapepigenomics_Histone_narrow	H1_Derived_Neuronal_Progenitor_Cultured_Cells	H3K4me2	20198	64679	0.312281	8216.75	388.119	30.8701	2.45815	1.50681e-209	3.76854e-206	Null_Model_OpenChrom	human
Roadmapepigenomics_Histone_narrow	NHEK-Epidermal_Keratinocytes	H3K4me3	21626	64679	0.334359	8944.29	410.814	30.8697	2.41786	1.5234e-209	3.81003e-206	Null_Model_OpenChrom	human
Roadmapepigenomics_ActiveChromatin	CD8_Memory_Primary	2_TssAFlnk	10544	64679	0.16302	2905.18	247.483	30.8661	3.62938	1.70542e-209	4.26525e-206	Null_Model_OpenChrom	human
Roadmapepigenomics_Histone_narrow	Bone_Marrow_Derived_Mesenchymal_Stem_Cell_Cultured_Cells	H3K4me3	21624	64679	0.334328	8943.07	410.845	30.8655	2.41796	1.73528e-209	4.33993e-206	Null_Model_OpenChrom	human
Roadmapepigenomics_Histone_narrow	Pancreatic_Islets	H3K27ac	15294	64679	0.23646	5231.54	326.028	30.8638	2.92342	1.82883e-209	4.57389e-206	Null_Model_OpenChrom	human
Roadmapepigenomics_Histone_narrow	Skeletal_Muscle_Female	H3K9ac	22989	64679	0.355432	9788.2	427.785	30.8585	2.34864	2.15513e-209	5.38999e-206	Null_Model_OpenChrom	human
Roadmapepigenomics_Histone_narrow	Gastric	H3K27ac	18685	64679	0.288888	7410.14	365.378	30.8581	2.52154	2.18096e-209	5.45459e-206	Null_Model_OpenChrom	human
Roadmapepigenomics_Histone_narrow	Chondrocytes_from_Bone_Marrow_Derived_Mesenchymal_Stem_Cell_Cultured_Cells	H3K9ac	21510	64679	0.332565	8979.89	406.092	30.8554	2.39535	2.37168e-209	5.93157e-206	Null_Model_OpenChrom	human
Roadmapepigenomics_Histone_narrow	NH-A_Astrocytes	H3K4me3	20380	64679	0.315095	8257.87	392.924	30.8511	2.46795	2.70628e-209	6.76841e-206	Null_Model_OpenChrom	human
Roadmapepigenomics_ActiveChromatin	Adult_Liver	ActiveChromatin	29158	64679	0.450811	14514.4	474.787	30.8425	2.0089	3.53463e-209	8.84011e-206	Null_Model_OpenChrom	human
Roadmapepigenomics_Histone_narrow	NHEK-Epidermal_Keratinocytes	H3K9ac	20766	64679	0.321062	8701.99	391.168	30.841	2.38635	3.69933e-209	9.25203e-206	Null_Model_OpenChrom	human
Roadmapepigenomics_Histone_narrow	HUES48_Cell_Line	H3K4me3	20138	64679	0.311353	8133.1	389.252	30.8409	2.47606	3.70398e-209	9.26366e-206	Null_Model_OpenChrom	human
Roadmapepigenomics_Histone_narrow	iPS_DF_19.11_Cell_Line	H3K4me3	18486	64679	0.285811	7067.12	370.255	30.8406	2.61578	3.74326e-209	9.36189e-206	Null_Model_OpenChrom	human
Roadmapepigenomics_Histone_narrow	NHDF-Ad_Adult_Dermal_Fibroblasts	H3K4me2	23392	64679	0.361663	10564.2	415.98	30.8374	2.21426	4.12822e-209	1.03247e-205	Null_Model_OpenChrom	human
Roadmapepigenomics_Histone_narrow	hESC_Derived_CD184+_Endoderm_Cultured_Cells	H3K9ac	15642	64679	0.24184	5521.06	328.211	30.8366	2.83315	4.23024e-209	1.05798e-205	Null_Model_OpenChrom	human
Roadmapepigenomics_Histone_narrow	A549_EtOH_0.02pct_Lung_Carcinoma	H3K4me3	22246	64679	0.343945	9451.88	415.063	30.8245	2.35361	6.14661e-209	1.53727e-205	Null_Model_OpenChrom	human
Roadmapepigenomics_Histone_narrow	H1_Derived_Mesenchymal_Stem_Cells	H3K9ac	16604	64679	0.256714	6368.05	332.083	30.8234	2.60739	6.35852e-209	1.59027e-205	Null_Model_OpenChrom	human
Roadmapepigenomics_ActiveChromatin	Pancreatic_Islets	ActiveChromatin	21461	64679	0.331808	9109.7	400.719	30.8229	2.35584	6.47067e-209	1.61831e-205	Null_Model_OpenChrom	human
DNaseI_Duke	Osteobl	Dnase	28449	64679	0.439849	13842.6	473.928	30.8199	2.05518	7.08175e-209	1.77115e-205	Null_Model_OpenChrom	human
Roadmapepigenomics_Histone_narrow	H1_BMP4_Derived_Trophoblast_Cultured_Cells	H2A.Z	23586	64679	0.364662	10696.9	418.265	30.8157	2.20495	8.06419e-209	2.01685e-205	Null_Model_OpenChrom	human
Roadmapepigenomics_Histone_narrow	Fetal_Heart	H3K4me3	16708	64679	0.258322	6478.71	331.953	30.8155	2.57891	8.1261e-209	2.03234e-205	Null_Model_OpenChrom	human
Roadmapepigenomics_Histone_narrow	iPS-18_Cell_Line	H3K4me3	19849	64679	0.306885	8100.67	381.312	30.8103	2.45029	9.53743e-209	2.38531e-205	Null_Model_OpenChrom	human
Roadmapepigenomics_Histone_narrow	Osteoblasts	H3K4me2	27604	64679	0.426785	13970.3	442.513	30.8097	1.9759	9.71777e-209	2.43041e-205	Null_Model_OpenChrom	human
Roadmapepigenomics_Histone_narrow	IMR90_Cell_Line	H3K9ac	21863	64679	0.338023	9469.23	402.31	30.8065	2.30885	1.07108e-208	2.67877e-205	Null_Model_OpenChrom	human
Enhancers_Hnisz2013	CD56	Enhancer	15545	64679	0.240341	5550.79	324.424	30.806	2.8005	1.08912e-208	2.7239e-205	Null_Model_OpenChrom	human
Roadmapepigenomics_ActiveChromatin	Fetal_Adrenal_Gland	2_TssAFlnk	9167	64679	0.141731	2468.32	217.454	30.8051	3.71386	1.12007e-208	2.8013e-205	Null_Model_OpenChrom	human
Roadmapepigenomics_Histone_narrow	Penis_Foreskin_Fibroblast_Primary_Cells_skin01	H3K4me3	24837	64679	0.384004	11731	425.451	30.8049	2.1172	1.12683e-208	2.81819e-205	Null_Model_OpenChrom	human
Roadmapepigenomics_Histone_narrow	Pancreas	H3K27ac	16254	64679	0.251303	6122.44	328.911	30.8034	2.65482	1.18092e-208	2.95348e-205	Null_Model_OpenChrom	human
Roadmapepigenomics_Histone_narrow	HSMMtube_Skeletal_Muscle_Myotubes_Derived_from_HSMM	H2A.Z	24758	64679	0.382783	11509.1	430.115	30.8031	2.15117	1.19082e-208	2.97824e-205	Null_Model_OpenChrom	human
Roadmapepigenomics_Histone_narrow	NHLF_Lung_Fibroblasts	H3K4me2	23281	64679	0.359947	10518.9	414.37	30.7989	2.21326	1.35625e-208	3.39199e-205	Null_Model_OpenChrom	human
Roadmapepigenomics_Histone_narrow	HMEC_Mammary_Epithelial	H3K9ac	17988	64679	0.278112	7077.36	354.393	30.7869	2.54162	1.96376e-208	4.91137e-205	Null_Model_OpenChrom	human
Roadmapepigenomics_Histone_narrow	Skeletal_Muscle_Male	H3K9ac	25672	64679	0.396914	12069.7	441.828	30.7865	2.12698	1.98707e-208	4.96965e-205	Null_Model_OpenChrom	human
Roadmapepigenomics_ActiveChromatin	Rectal_Smooth_Muscle	ActiveChromatin	26499	64679	0.4097	13104.5	435.083	30.7861	2.02213	2.01386e-208	5.03667e-205	Null_Model_OpenChrom	human
Roadmapepigenomics_Histone_narrow	H9_Cell_Line	H3K23me2	17849	64679	0.275963	7071.85	350.113	30.7819	2.52395	2.28991e-208	5.72706e-205	Null_Model_OpenChrom	human
Roadmapepigenomics_Histone_narrow	HUVEC_Umbilical_Vein_Endothelial_Cells	H3K4me2	23062	64679	0.356561	10348.3	413.114	30.7752	2.22858	2.81134e-208	7.03115e-205	Null_Model_OpenChrom	human
Roadmapepigenomics_ActiveChromatin	Brain_Anterior_Caudate	ActiveChromatin	29783	64679	0.460474	15568.9	461.913	30.7723	1.91298	3.07838e-208	7.69904e-205	Null_Model_OpenChrom	human
Roadmapepigenomics_ActiveChromatin	Duodenum_Smooth_Muscle	ActiveChromatin	27551	64679	0.425965	13557.5	454.746	30.7722	2.03217	3.08313e-208	7.7109e-205	Null_Model_OpenChrom	human
Enhancers_Hnisz2013	MM1S	Enhancer	11730	64679	0.181357	3689.86	261.297	30.7702	3.17898	3.28481e-208	8.21531e-205	Null_Model_OpenChrom	human
Roadmapepigenomics_Histone_narrow	ES-I3_Cell_Line	H3K4me3	20752	64679	0.320846	8401.67	401.402	30.768	2.46998	3.51445e-208	8.78964e-205	Null_Model_OpenChrom	human
Roadmapepigenomics_Histone_narrow	H1_BMP4_Derived_Mesendoderm_Cultured_Cells	H4K8ac	13004	64679	0.201054	4363.89	280.828	30.7666	2.97991	3.66786e-208	9.17332e-205	Null_Model_OpenChrom	human
Roadmapepigenomics_Histone_narrow	HMEC_Mammary_Epithelial	H3K4me2	24170	64679	0.373692	11561.3	409.882	30.7617	2.09059	4.26038e-208	1.06552e-204	Null_Model_OpenChrom	human
Roadmapepigenomics_Histone_narrow	H1_Cell_Line	H4K5ac	14779	64679	0.228498	5355.97	306.338	30.7602	2.75935	4.46236e-208	1.11604e-204	Null_Model_OpenChrom	human
Roadmapepigenomics_Histone_narrow	H1_Derived_Mesenchymal_Stem_Cells	H3K4me3	17973	64679	0.27788	7041.13	355.396	30.7597	2.55257	4.53811e-208	1.13498e-204	Null_Model_OpenChrom	human
Roadmapepigenomics_Histone_narrow	iPS-20b_Cell_Line	H3K4me3	21113	64679	0.326427	9125.43	389.747	30.7573	2.31365	4.87597e-208	1.21948e-204	Null_Model_OpenChrom	human
BroadChromHMM	HMEC	WeakPromoter	8779	64679	0.135732	2381.47	208.003	30.7569	3.68639	4.94246e-208	1.23611e-204	Null_Model_OpenChrom	human
Roadmapepigenomics_Histone_narrow	Bone_Marrow_Derived_Mesenchymal_Stem_Cell_Cultured_Cells	H3K9ac	18937	64679	0.292784	7813.14	361.682	30.7559	2.42374	5.09672e-208	1.27469e-204	Null_Model_OpenChrom	human
Roadmapepigenomics_ActiveChromatin	Duodenum_Mucosa	2_TssAFlnk	12358	64679	0.191067	4063.28	269.697	30.7557	3.04139	5.12957e-208	1.2829e-204	Null_Model_OpenChrom	human
Roadmapepigenomics_ActiveChromatin	Adult_Liver	2_TssAFlnk	12569	64679	0.194329	4007.74	278.378	30.7541	3.13619	5.38769e-208	1.34746e-204	Null_Model_OpenChrom	human
Roadmapepigenomics_ActiveChromatin	Brain_Angular_Gyrus	ActiveChromatin	26787	64679	0.414153	13370.8	436.286	30.7509	2.0034	5.93907e-208	1.48536e-204	Null_Model_OpenChrom	human
Roadmapepigenomics_Histone_narrow	Mesenchymal_Stem_Cell_Derived_Adipocyte_Cultured_Cells	H3K4me3	21903	64679	0.338642	10371.5	374.997	30.7509	2.11184	5.95392e-208	1.48908e-204	Null_Model_OpenChrom	human
Roadmapepigenomics_Histone_narrow	Fetal_Lung	H3K9ac	20164	64679	0.311755	8411.34	382.369	30.7364	2.39724	9.29232e-208	2.32401e-204	Null_Model_OpenChrom	human
Roadmapepigenomics_ActiveChromatin	CD19_Primary_Cord_BI	7_Enh	16535	64679	0.255647	6302.94	332.926	30.7338	2.62338	1.00771e-207	2.52028e-204	Null_Model_OpenChrom	human
Roadmapepigenomics_Histone_narrow	GM12878_Lymphoblastoid	H3K79me2	16815	64679	0.259976	6746.72	327.626	30.7311	2.49232	1.09497e-207	2.73853e-204	Null_Model_OpenChrom	human
Roadmapepigenomics_Histone_narrow	NHEK-Epidermal_Keratinocytes	H3K4me2	26082	64679	0.403253	13299.8	415.943	30.7307	1.96109	1.10741e-207	2.76963e-204	Null_Model_OpenChrom	human
Roadmapepigenomics_Histone_narrow	iPS-20b_Cell_Line	H3K9ac	20439	64679	0.316007	8728.36	381.09	30.7293	2.34168	1.15551e-207	2.88993e-204	Null_Model_OpenChrom	human
BroadChromHMM	HSMM	WeakPromoter	10079	64679	0.155831	2942.53	232.251	30.7275	3.42529	1.2228e-207	3.05824e-204	Null_Model_OpenChrom	human
Roadmapepigenomics_Histone_narrow	H9_Cell_Line	H3K9ac	16934	64679	0.261816	6598.88	336.35	30.7273	2.56619	1.23013e-207	3.07657e-204	Null_Model_OpenChrom	human
Roadmapepigenomics_Histone_narrow	Adipose_Derived_Mesenchymal_Stem_Cell_Cultured_Cells	H3K4me3	22984	64679	0.355355	10495.5	406.446	30.7262	2.1899	1.27148e-207	3.17998e-204	Null_Model_OpenChrom	human
Roadmapepigenomics_ActiveChromatin	K562_Leukemia	ActiveChromatin	27968	64679	0.432412	13512	470.526	30.7231	2.06987	1.39689e-207	3.49363e-204	Null_Model_OpenChrom	human
Roadmapepigenomics_Histone_narrow	IMR90_Cell_Line	H3K4me2	25337	64679	0.391735	12619.4	413.961	30.7218	2.00778	1.45596e-207	3.64136e-204	Null_Model_OpenChrom	human
Roadmapepigenomics_Histone_narrow	H1_Cell_Line	H3K4me2	26320	64679	0.406933	12814.9	439.602	30.7213	2.05387	1.47835e-207	3.69736e-204	Null_Model_OpenChrom	human
Roadmapepigenomics_Histone_narrow	iPS-18_Cell_Line	H3K27ac	10539	64679	0.162943	3351.41	233.988	30.7178	3.14465	1.64587e-207	4.11631e-204	Null_Model_OpenChrom	human
Roadmapepigenomics_ActiveChromatin	Brain_Inferior_Temporal_Lobe	ActiveChromatin	28697	64679	0.443683	14695.7	455.811	30.7174	1.95275	1.66461e-207	4.16318e-204	Null_Model_OpenChrom	human
Roadmapepigenomics_ActiveChromatin	Spleen	ActiveChromatin	27817	64679	0.430078	14094.7	446.76	30.7152	1.97358	1.78237e-207	4.4577e-204	Null_Model_OpenChrom	human
Roadmapepigenomics_Histone_narrow	H1_Cell_Line	H3K27ac	17398	64679	0.26899	7480.38	322.926	30.7117	2.32582	1.98339e-207	4.96046e-204	Null_Model_OpenChrom	human
Roadmapepigenomics_ActiveChromatin	Brain_Cingulate_Gyrus	ActiveChromatin	28554	64679	0.441473	14758	449.245	30.7092	1.93481	2.14369e-207	5.36137e-204	Null_Model_OpenChrom	human
Roadmapepigenomics_Histone_narrow	Brain_Substantia_Nigra	H3K27ac	25073	64679	0.387653	12169.1	420.3	30.7015	2.06038	2.71384e-207	6.78731e-204	Null_Model_OpenChrom	human
Enhancers_Hnisz2013	BI_CD4p_CD25-_CD45ROp_Memory	Enhancer	13905	64679	0.214985	5070.79	287.765	30.6994	2.74218	2.90292e-207	7.2602e-204	Null_Model_OpenChrom	human
Enhancers_Hnisz2013	BI_CD4p_CD25-_CD45RAp_Naive	Enhancer	15621	64679	0.241516	5986.15	313.854	30.6985	2.60952	2.98176e-207	7.45739e-204	Null_Model_OpenChrom	human
Roadmapepigenomics_Histone_narrow	Muscle_Satellite_Cultured_Cells	H3K4me2	25731	64679	0.397826	12654.4	425.979	30.6977	2.03336	3.05363e-207	7.63712e-204	Null_Model_OpenChrom	human
Roadmapepigenomics_Histone_narrow	Fetal_Heart	H3K9ac	23738	64679	0.367012	11256	406.659	30.6939	2.10891	3.4313e-207	8.58167e-204	Null_Model_OpenChrom	human
Roadmapepigenomics_Histone_narrow	HSMM_Skeletal_Muscle_Myoblasts	H3K4me2	22303	64679	0.344826	10454.1	386.036	30.6938	2.13342	3.44367e-207	8.61263e-204	Null_Model_OpenChrom	human
Roadmapepigenomics_Histone_narrow	Penis_Foreskin_Melanocyte_Primary_Cells_skin01	H3K27ac	15428	64679	0.238532	6189.34	300.997	30.6935	2.49267	3.47594e-207	8.69332e-204	Null_Model_OpenChrom	human
Roadmapepigenomics_Histone_narrow	H1_Cell_Line	H2A.Z	18329	64679	0.283384	7885.29	340.319	30.688	2.32446	4.11883e-207	1.03012e-203	Null_Model_OpenChrom	human
Roadmapepigenomics_ActiveChromatin	Aorta	ActiveChromatin	19596	64679	0.302973	8561.94	359.581	30.6859	2.28873	4.39336e-207	1.09878e-203	Null_Model_OpenChrom	human
Roadmapepigenomics_ActiveChromatin	Brain_Hippocampus_Middle	ActiveChromatin	30693	64679	0.474544	16461.2	463.803	30.6849	1.86456	4.52122e-207	1.13076e-203	Null_Model_OpenChrom	human
Roadmapepigenomics_Histone_narrow	NH-A_Astrocytes	H3K9ac	21753	64679	0.336322	10238.5	375.318	30.6794	2.12464	5.36161e-207	1.34094e-203	Null_Model_OpenChrom	human
Roadmapepigenomics_ActiveChromatin	iPS_DF_6.9	ActiveChromatin	23228	64679	0.359127	11244.5	390.613	30.6787	2.06572	5.47746e-207	1.36991e-203	Null_Model_OpenChrom	human
DNaseClusters	Fibrobl	Dnase	33586	64679	0.519272	19476.9	459.949	30.6754	1.7244	6.05776e-207	1.51505e-203	Null_Model_OpenChrom	human
Enhancers_Hnisz2013	CD8_primary	Enhancer	14485	64679	0.223952	5668.67	287.474	30.6682	2.55527	7.55221e-207	1.88881e-203	Null_Model_OpenChrom	human
Roadmapepigenomics_Histone_narrow	Brain_Anterior_Caudate	H3K27ac	27031	64679	0.417925	14413.3	411.527	30.6607	1.87542	9.51489e-207	2.37967e-203	Null_Model_OpenChrom	human
Roadmapepigenomics_Histone_narrow	Muscle_Satellite_Cultured_Cells	H3K9ac	21608	64679	0.334081	10044.1	377.167	30.6599	2.15131	9.76549e-207	2.44235e-203	Null_Model_OpenChrom	human
Roadmapepigenomics_ActiveChromatin	Brain_Dorsolateral_Prefrontal_Cortex	ActiveChromatin	26846	64679	0.415065	13628.7	431.1	30.6595	1.96982	9.8596e-207	2.46589e-203	Null_Model_OpenChrom	human
Roadmapepigenomics_ActiveChromatin	ES-WA7	ActiveChromatin	22090	64679	0.341533	10293.8	384.791	30.656	2.14594	1.0977e-206	2.74534e-203	Null_Model_OpenChrom	human
Roadmapepigenomics_Histone_narrow	Adult_Liver	H3K27ac	24284	64679	0.375454	11827.7	406.341	30.6547	2.05314	1.14533e-206	2.86446e-203	Null_Model_OpenChrom	human
Roadmapepigenomics_ActiveChromatin	Gastric	ActiveChromatin	22483	64679	0.347609	10978.3	375.34	30.6513	2.04794	1.26838e-206	3.17222e-203	Null_Model_OpenChrom	human
Roadmapepigenomics_Histone_narrow	Duodenum_Smooth_Muscle	H3K27ac	20345	64679	0.314553	9285.9	360.839	30.6483	2.19096	1.39343e-206	3.48497e-203	Null_Model_OpenChrom	human
Roadmapepigenomics_ActiveChromatin	Brain_Substantia_Nigra	ActiveChromatin	27806	64679	0.429908	14244.6	442.494	30.6477	1.95204	1.41834e-206	3.54728e-203	Null_Model_OpenChrom	human
Roadmapepigenomics_Histone_narrow	Duodenum_Mucosa	H3K4me1	27666	64679	0.427743	14761.4	421.155	30.641	1.87421	1.74306e-206	4.35938e-203	Null_Model_OpenChrom	human
Roadmapepigenomics_ActiveChromatin	Psoas_Muscle	ActiveChromatin	23908	64679	0.369641	12101.5	385.343	30.6388	1.97562	1.86234e-206	4.65772e-203	Null_Model_OpenChrom	human
Enhancers_Hnisz2013	BI_CD4p_CD25-_Il17-_PMAstim_Th	Enhancer	18201	64679	0.281405	7907.12	335.991	30.6374	2.30185	1.94719e-206	4.86993e-203	Null_Model_OpenChrom	human
DNaseClusters	Osteobl	Dnase	32483	64679	0.502219	18322.6	462.197	30.6371	1.77284	1.96127e-206	4.90513e-203	Null_Model_OpenChrom	human
Roadmapepigenomics_Histone_narrow	A549_EtOH_0.02pct_Lung_Carcinoma	H3K27ac	20042	64679	0.309869	9263.78	351.85	30.633	2.16348	2.22614e-206	5.56757e-203	Null_Model_OpenChrom	human
Roadmapepigenomics_Histone_narrow	Adult_Liver	H3K4me1	26811	64679	0.414524	14247.6	410.238	30.6247	1.88179	2.87158e-206	7.18181e-203	Null_Model_OpenChrom	human
Roadmapepigenomics_Histone_narrow	Rectal_Mucosa.Donor_29	H3K4me1	23089	64679	0.356978	11443.1	380.292	30.6237	2.01773	2.96296e-206	7.41036e-203	Null_Model_OpenChrom	human
Roadmapepigenomics_Histone_narrow	Right_Atrium	H3K36me3	17010	64679	0.262991	7138.77	322.343	30.6234	2.38277	2.98774e-206	7.47235e-203	Null_Model_OpenChrom	human
Roadmapepigenomics_ActiveChromatin	Stomach_Mucosa	ActiveChromatin	27949	64679	0.432119	14522.8	438.445	30.6223	1.92449	3.09354e-206	7.73693e-203	Null_Model_OpenChrom	human
Roadmapepigenomics_Histone_narrow	H1_Cell_Line	H3K56ac	9025	64679	0.139535	2705.26	206.386	30.6209	3.33609	3.22089e-206	8.05546e-203	Null_Model_OpenChrom	human
Roadmapepigenomics_Histone_narrow	HeLa-S3_Cervical_Carcinoma	H3K27ac	19158	64679	0.296201	8447.85	349.774	30.6202	2.2678	3.29497e-206	8.24072e-203	Null_Model_OpenChrom	human
Roadmapepigenomics_Histone_narrow	Psoas_Muscle	H3K27ac	19262	64679	0.297809	8655.74	346.463	30.613	2.22534	4.10766e-206	1.02733e-202	Null_Model_OpenChrom	human
BroadChromHMM	HepG2	WeakPromoter	11721	64679	0.181218	4136.05	247.8	30.6091	2.83386	4.62703e-206	1.15722e-202	Null_Model_OpenChrom	human
Roadmapepigenomics_Histone_narrow	Penis_Foreskin_Fibroblast_Primary_Cells_skin02	H3K4me3	25553	64679	0.395074	12874.4	414.216	30.6086	1.98479	4.70582e-206	1.17693e-202	Null_Model_OpenChrom	human
Roadmapepigenomics_ActiveChromatin	Adipose_Nuclei	ActiveChromatin	32136	64679	0.496854	18191	455.664	30.6038	1.76659	5.45313e-206	1.36383e-202	Null_Model_OpenChrom	human
Roadmapepigenomics_Histone_narrow	Adipose_Derived_Mesenchymal_Stem_Cell_Cultured_Cells	H3K9ac	24423	64679	0.377603	12000.2	405.945	30.6023	2.03522	5.70133e-206	1.4259e-202	Null_Model_OpenChrom	human
Enhancers_Hnisz2013	BI_CD4_Memory_Primary_7pool	Enhancer	17696	64679	0.273597	7771.92	324.301	30.6014	2.27691	5.8559e-206	1.46456e-202	Null_Model_OpenChrom	human
Roadmapepigenomics_Histone_narrow	hESC_Derived_CD184+_Endoderm_Cultured_Cells	H3K4me3	18552	64679	0.286832	8303.24	334.924	30.6003	2.23431	6.06818e-206	1.51765e-202	Null_Model_OpenChrom	human
Enhancers_Hnisz2013	DND41	Enhancer	12940	64679	0.200065	4941.36	261.436	30.595	2.61871	7.12564e-206	1.78212e-202	Null_Model_OpenChrom	human
Roadmapepigenomics_ActiveChromatin	Pancreas	ActiveChromatin	26495	64679	0.409638	14212.7	401.461	30.594	1.86418	7.35587e-206	1.8397e-202	Null_Model_OpenChrom	human
Roadmapepigenomics_Histone_narrow	iPS_DF_19.11_Cell_Line	H3K27ac	17450	64679	0.269794	7249.73	333.408	30.594	2.40699	7.3642e-206	1.84179e-202	Null_Model_OpenChrom	human
Roadmapepigenomics_Histone_narrow	Brain_Cingulate_Gyrus	H3K27ac	24252	64679	0.374959	12562.1	382.131	30.5915	1.93058	7.94882e-206	1.988e-202	Null_Model_OpenChrom	human
Roadmapepigenomics_Histone_narrow	Rectal_Mucosa.Donor_31	H3K4me1	24673	64679	0.381468	12825.4	387.291	30.5909	1.92376	8.08667e-206	2.02248e-202	Null_Model_OpenChrom	human
Roadmapepigenomics_ActiveChromatin	Colonic_Mucosa	2_TssAFlnk	8810	64679	0.136211	2647.72	201.45	30.5896	3.32739	8.42034e-206	2.10593e-202	Null_Model_OpenChrom	human
Roadmapepigenomics_Histone_narrow	H9_Cell_Line	H3K18ac	17427	64679	0.269438	7554.34	322.82	30.5826	2.30688	1.04346e-205	2.60968e-202	Null_Model_OpenChrom	human
Roadmapepigenomics_Histone_narrow	HUES6_Cell_Line	H3K9ac	20003	64679	0.309266	9119.78	355.903	30.5792	2.19336	1.15813e-205	2.89649e-202	Null_Model_OpenChrom	human
Roadmapepigenomics_Histone_narrow	Spleen	H3K4me3	20002	64679	0.30925	9240.11	352.03	30.571	2.16469	1.48798e-205	3.72145e-202	Null_Model_OpenChrom	human
Roadmapepigenomics_Histone_narrow	Mesenchymal_Stem_Cell_Derived_Adipocyte_Cultured_Cells	H3K9ac	23285	64679	0.360009	11390.7	389.153	30.5646	2.04421	1.81064e-205	4.5284e-202	Null_Model_OpenChrom	human
Roadmapepigenomics_Histone_narrow	iPS-15b_Cell_Line	H3K9ac	18995	64679	0.293681	8571.61	341.032	30.5643	2.21604	1.8264e-205	4.56783e-202	Null_Model_OpenChrom	human
Roadmapepigenomics_ActiveChromatin	Esophagus	ActiveChromatin	24484	64679	0.378546	12450.6	393.708	30.5642	1.96649	1.82919e-205	4.57481e-202	Null_Model_OpenChrom	human
Roadmapepigenomics_Histone_narrow	Lung	H3K27ac	25117	64679	0.388333	12838	401.773	30.562	1.95646	1.95587e-205	4.89163e-202	Null_Model_OpenChrom	human
Roadmapepigenomics_Histone_narrow	Brain_Hippocampus_Middle	H3K27ac	27468	64679	0.424682	14328.9	429.989	30.5568	1.91696	2.29811e-205	5.74758e-202	Null_Model_OpenChrom	human
Roadmapepigenomics_Histone_narrow	HepG2_Hepatocellular_Carcinoma	H3K27ac	15898	64679	0.245798	6681.8	301.64	30.5536	2.3793	2.52919e-205	6.32551e-202	Null_Model_OpenChrom	human
Enhancers_Hnisz2013	BI_CD4_Naive_Primary_8pool	Enhancer	8639	64679	0.133567	2741.65	193.02	30.553	3.15102	2.58135e-205	6.45596e-202	Null_Model_OpenChrom	human
Roadmapepigenomics_Histone_narrow	Esophagus	H3K27ac	22639	64679	0.350021	11097.8	377.764	30.5514	2.03996	2.70993e-205	6.77754e-202	Null_Model_OpenChrom	human
Roadmapepigenomics_ActiveChromatin	HeLa-S3_Cervical_Carcinoma	ActiveChromatin	25012	64679	0.38671	13349.6	381.765	30.5486	1.87361	2.95144e-205	7.38154e-202	Null_Model_OpenChrom	human
Roadmapepigenomics_Histone_narrow	H1_Derived_Mesenchymal_Stem_Cells	H4K8ac	21985	64679	0.339909	10543.3	374.588	30.5449	2.08522	3.30655e-205	8.26967e-202	Null_Model_OpenChrom	human
Roadmapepigenomics_ActiveChromatin	Stomach_Smooth_Muscle	ActiveChromatin	28487	64679	0.440437	15398.9	428.488	30.5448	1.84994	3.31233e-205	8.28414e-202	Null_Model_OpenChrom	human
Roadmapepigenomics_Histone_narrow	Fetal_Placenta	H3K27ac	19656	64679	0.303901	9434.39	334.651	30.5441	2.08344	3.38722e-205	8.47145e-202	Null_Model_OpenChrom	human
Roadmapepigenomics_Histone_narrow	HUVEC_Umbilical_Vein_Endothelial_Cells	H3K27ac	18175	64679	0.281003	8304.73	323.15	30.5439	2.18851	3.4071e-205	8.52115e-202	Null_Model_OpenChrom	human
Roadmapepigenomics_ActiveChromatin	HUVEC_Umbilical_Vein_Endothelial	ActiveChromatin	26809	64679	0.414493	14513.3	402.629	30.5385	1.8472	4.02069e-205	1.00558e-201	Null_Model_OpenChrom	human
Roadmapepigenomics_Histone_narrow	H1_BMP4_Derived_Mesendoderm_Cultured_Cells	H3K18ac	17296	64679	0.267413	7583.23	318.058	30.5378	2.28082	4.10853e-205	1.02754e-201	Null_Model_OpenChrom	human
Roadmapepigenomics_Histone_narrow	Fetal_Intestine_Small	H3K27ac	22033	64679	0.340652	10931.6	363.589	30.533	2.01554	4.76152e-205	1.19086e-201	Null_Model_OpenChrom	human
Roadmapepigenomics_ActiveChromatin	Colon_Smooth_Muscle	ActiveChromatin	27183	64679	0.420276	14653.8	410.373	30.5314	1.85502	4.99855e-205	1.25014e-201	Null_Model_OpenChrom	human
Enhancers_Hnisz2013	BI_CD8_Naive_8pool	Enhancer	9736	64679	0.150528	3245.92	212.574	30.5309	2.99946	5.06619e-205	1.26705e-201	Null_Model_OpenChrom	human
Roadmapepigenomics_Histone_narrow	H1_BMP4_Derived_Trophoblast_Cultured_Cells	H4K8ac	22077	64679	0.341332	10569	376.93	30.5309	2.08885	5.07154e-205	1.26839e-201	Null_Model_OpenChrom	human
Roadmapepigenomics_ActiveChromatin	Lung	ActiveChromatin	24570	64679	0.379876	12806.9	385.395	30.5223	1.9185	6.5961e-205	1.64969e-201	Null_Model_OpenChrom	human
Roadmapepigenomics_ActiveChromatin	Chondrocytes_from_Bone_Marrow_Derived_Mesenchymal_Stem_Cell	2_TssAFlnk	13487	64679	0.208522	5273.5	269.104	30.5217	2.5575	6.71878e-205	1.68037e-201	Null_Model_OpenChrom	human
Roadmapepigenomics_Histone_narrow	H1_BMP4_Derived_Trophoblast_Cultured_Cells	H4K12ac	18842	64679	0.291316	8432.06	341.07	30.5214	2.23457	6.77213e-205	1.69371e-201	Null_Model_OpenChrom	human
BroadChromHMM	K562	WeakPromoter	7064	64679	0.109216	2034.7	164.789	30.5197	3.47177	7.14488e-205	1.78693e-201	Null_Model_OpenChrom	human
Roadmapepigenomics_ActiveChromatin	Fetal_Intestine_Large	ActiveChromatin	27110	64679	0.419147	14611.1	409.542	30.5193	1.85544	7.23024e-205	1.80828e-201	Null_Model_OpenChrom	human
Roadmapepigenomics_Histone_narrow	Rectal_Smooth_Muscle	H3K27ac	19980	64679	0.30891	9708.73	336.566	30.5179	2.05794	7.55009e-205	1.88828e-201	Null_Model_OpenChrom	human
Roadmapepigenomics_ActiveChromatin	Fetal_Intestine_Small	ActiveChromatin	28203	64679	0.436046	15404	419.398	30.5175	1.83088	7.63297e-205	1.90901e-201	Null_Model_OpenChrom	human
Roadmapepigenomics_ActiveChromatin	H9	ActiveChromatin	22299	64679	0.344764	11317.8	360.011	30.5023	1.97025	1.21442e-204	3.03727e-201	Null_Model_OpenChrom	human
Roadmapepigenomics_Histone_narrow	Fetal_Intestine_Large	H3K27ac	21236	64679	0.328329	10544.4	350.538	30.5005	2.01396	1.28407e-204	3.21145e-201	Null_Model_OpenChrom	human
Roadmapepigenomics_ActiveChromatin	HUES48	ActiveChromatin	27767	64679	0.429305	15522.3	401.479	30.499	1.78884	1.34532e-204	3.36464e-201	Null_Model_OpenChrom	human
Enhancers_Hnisz2013	BI_CD4p_CD225int_CD127p_Tmem	Enhancer	8393	64679	0.129764	2659.45	188.063	30.4875	3.15591	1.91081e-204	4.77893e-201	Null_Model_OpenChrom	human
Roadmapepigenomics_ActiveChromatin	Skeletal_Muscle_Female	ActiveChromatin	30922	64679	0.478084	17641.1	435.631	30.4865	1.75284	1.96568e-204	4.91618e-201	Null_Model_OpenChrom	human
Roadmapepigenomics_ActiveChromatin	CD56_Primary	7_Enh	16754	64679	0.259033	7466.61	304.673	30.4831	2.24386	2.17995e-204	5.45206e-201	Null_Model_OpenChrom	human
Roadmapepigenomics_Histone_narrow	HSMMtube_Skeletal_Muscle_Myotubes_Derived_from_HSMM	H3K4me2	24444	64679	0.377928	12642.6	387.216	30.4775	1.93346	2.58749e-204	6.47132e-201	Null_Model_OpenChrom	human
Roadmapepigenomics_ActiveChromatin	Left_Ventricle	ActiveChromatin	27150	64679	0.419765	15303.7	388.736	30.4738	1.77408	2.90273e-204	7.25972e-201	Null_Model_OpenChrom	human
Roadmapepigenomics_Histone_narrow	Brain_Angular_Gyrus	H3K27ac	23383	64679	0.361524	12101.3	370.234	30.4718	1.93227	3.08348e-204	7.71179e-201	Null_Model_OpenChrom	human
Roadmapepigenomics_ActiveChromatin	iPS-15b	ActiveChromatin	28229	64679	0.436448	15851.6	406.196	30.4714	1.78083	3.11739e-204	7.79659e-201	Null_Model_OpenChrom	human
Roadmapepigenomics_Histone_narrow	NHLF_Lung_Fibroblasts	H3K27ac	18442	64679	0.285131	8677.47	320.498	30.4667	2.12527	3.59924e-204	9.00171e-201	Null_Model_OpenChrom	human
Roadmapepigenomics_Histone_narrow	Colon_Smooth_Muscle	H3K27ac	21381	64679	0.330571	10321.8	363.034	30.4633	2.07145	3.98885e-204	9.97611e-201	Null_Model_OpenChrom	human
Roadmapepigenomics_Histone_narrow	iPS-20b_Cell_Line	H3K27ac	15156	64679	0.234326	6367.32	288.549	30.4582	2.38028	4.66708e-204	1.16724e-200	Null_Model_OpenChrom	human
Roadmapepigenomics_Histone_narrow	Adipose_Nuclei	H3K4me1	32314	64679	0.499606	19200.4	430.61	30.4534	1.68298	5.39426e-204	1.3491e-200	Null_Model_OpenChrom	human
Roadmapepigenomics_ActiveChromatin	Skeletal_Muscle_Male	ActiveChromatin	31120	64679	0.481145	18187	424.698	30.4521	1.71111	5.61182e-204	1.40352e-200	Null_Model_OpenChrom	human
Enhancers_Hnisz2013	BI_CD4_Memory_Primary_8pool	Enhancer	8035	64679	0.124229	2474.09	182.625	30.4499	3.24766	6.0092e-204	1.5029e-200	Null_Model_OpenChrom	human
Enhancers_Hnisz2013	BI_CD4p_CD25-_Il17p_PMAstim_Th17	Enhancer	13544	64679	0.209403	5456.77	265.609	30.4479	2.48206	6.38486e-204	1.59685e-200	Null_Model_OpenChrom	human
Roadmapepigenomics_Histone_narrow	H1_Derived_Neuronal_Progenitor_Cultured_Cells	H3K27ac	11116	64679	0.171864	4080.53	231.071	30.4472	2.72415	6.52185e-204	1.63111e-200	Null_Model_OpenChrom	human
Roadmapepigenomics_Histone_narrow	Left_Ventricle	H3K27ac	21510	64679	0.332565	11015.6	344.725	30.4428	1.95269	7.45568e-204	1.86467e-200	Null_Model_OpenChrom	human
Enhancers_Hnisz2013	Fetal_Thymus	Enhancer	14251	64679	0.220334	6007.27	270.867	30.4346	2.37229	9.58421e-204	2.39701e-200	Null_Model_OpenChrom	human
Roadmapepigenomics_ActiveChromatin	Penis_Foreskin_Melanocyte_Primary_skin03	ActiveChromatin	27970	64679	0.432443	15919.1	395.989	30.4325	1.75701	1.02245e-203	2.55716e-200	Null_Model_OpenChrom	human
Enhancers_Hnisz2013	BI_CD8_Naive_7pool	Enhancer	7364	64679	0.113855	2250.79	168.047	30.4273	3.27174	1.19764e-203	2.99531e-200	Null_Model_OpenChrom	human
Roadmapepigenomics_Histone_narrow	H1_Derived_Neuronal_Progenitor_Cultured_Cells	H3K23ac	19145	64679	0.296	9365.56	321.414	30.4263	2.04419	1.23312e-203	3.08402e-200	Null_Model_OpenChrom	human
Roadmapepigenomics_Histone_narrow	H1_Cell_Line	H3K23me2	10371	64679	0.160346	3807.41	215.729	30.4252	2.7239	1.27557e-203	3.1902e-200	Null_Model_OpenChrom	human
Roadmapepigenomics_ActiveChromatin	Right_Atrium	ActiveChromatin	26532	64679	0.41021	14653.4	390.467	30.4216	1.81064	1.42225e-203	3.55705e-200	Null_Model_OpenChrom	human
Roadmapepigenomics_Histone_narrow	NHEK-Epidermal_Keratinocytes	H3K27ac	19416	64679	0.30019	9622.6	321.94	30.42	2.01775	1.49476e-203	3.73839e-200	Null_Model_OpenChrom	human
Roadmapepigenomics_ActiveChromatin	A549_EtOH_0.02pct_Lung_Carcinoma	ActiveChromatin	28176	64679	0.435628	15650	411.772	30.4197	1.80038	1.50717e-203	3.76943e-200	Null_Model_OpenChrom	human
Roadmapepigenomics_Histone_narrow	IMR90_Cell_Line	H2AK9ac	11407	64679	0.176363	4422.38	229.623	30.4177	2.57938	1.60111e-203	4.00438e-200	Null_Model_OpenChrom	human
Roadmapepigenomics_ActiveChromatin	Right_Ventricle	ActiveChromatin	26292	64679	0.4065	14655.9	382.556	30.4167	1.79395	1.654e-203	4.13666e-200	Null_Model_OpenChrom	human
Roadmapepigenomics_Histone_narrow	Right_Atrium	H3K27ac	19910	64679	0.307828	9750.62	334.027	30.4148	2.04192	1.74952e-203	4.37554e-200	Null_Model_OpenChrom	human
Roadmapepigenomics_ActiveChromatin	HUES6	ActiveChromatin	30816	64679	0.476445	18406.4	408.017	30.4145	1.6742	1.76639e-203	4.41774e-200	Null_Model_OpenChrom	human
Roadmapepigenomics_Histone_narrow	Penis_Foreskin_Melanocyte_Primary_Cells_skin03	H3K27ac	21921	64679	0.33892	11071.1	356.741	30.4139	1.98002	1.79674e-203	4.49364e-200	Null_Model_OpenChrom	human
Roadmapepigenomics_ActiveChromatin	Penis_Foreskin_Melanocyte_Primary_skin01	ActiveChromatin	25813	64679	0.399094	14055.4	386.629	30.4106	1.83652	1.99101e-203	4.97951e-200	Null_Model_OpenChrom	human
Roadmapepigenomics_Histone_narrow	Breast_Myoepithelial_Cells	H3K9ac	20011	64679	0.309389	9743.74	337.622	30.4105	2.05373	1.99734e-203	4.99534e-200	Null_Model_OpenChrom	human
Roadmapepigenomics_ActiveChromatin	Fetal_Placenta	ActiveChromatin	30100	64679	0.465375	17444	416.171	30.4105	1.72552	1.99801e-203	4.99702e-200	Null_Model_OpenChrom	human
Roadmapepigenomics_Histone_narrow	H1_BMP4_Derived_Mesendoderm_Cultured_Cells	H3K4ac	16044	64679	0.248056	7219.02	290.232	30.4066	2.22246	2.24689e-203	5.61948e-200	Null_Model_OpenChrom	human
Roadmapepigenomics_ActiveChromatin	Fetal_Brain_Female	ActiveChromatin	22504	64679	0.347934	11716	354.814	30.4047	1.9208	2.37998e-203	5.95233e-200	Null_Model_OpenChrom	human
Roadmapepigenomics_Histone_narrow	Fetal_Stomach	H3K27ac	23610	64679	0.365033	12787.7	356.156	30.3864	1.8463	4.16042e-203	1.04052e-199	Null_Model_OpenChrom	human
BroadChromHMM	GM12878	WeakPromoter	8302	64679	0.128357	2594	187.887	30.38	3.20047	5.04308e-203	1.26127e-199	Null_Model_OpenChrom	human
Roadmapepigenomics_Histone_narrow	Fetal_Brain_Male	H3K9me3	3945	64679	0.0609935	811.286	103.155	30.3786	4.86265	5.26222e-203	1.31608e-199	Null_Model_OpenChrom	human
Roadmapepigenomics_Histone_narrow	H1_Derived_Mesenchymal_Stem_Cells	H3K14ac	14283	64679	0.220829	6183.71	266.624	30.3772	2.30978	5.49102e-203	1.3733e-199	Null_Model_OpenChrom	human
Enhancers_Hnisz2013	CD3	Enhancer	9229	64679	0.142689	3230.98	197.452	30.3771	2.85641	5.50739e-203	1.3774e-199	Null_Model_OpenChrom	human
Roadmapepigenomics_Histone_narrow	HMEC_Mammary_Epithelial	H3K27ac	18150	64679	0.280617	8779.52	308.594	30.3651	2.06731	7.94603e-203	1.9873e-199	Null_Model_OpenChrom	human
Roadmapepigenomics_Histone_narrow	IMR90_Cell_Line	H3K56ac	13966	64679	0.215928	5875.35	266.456	30.364	2.37705	8.21388e-203	2.05429e-199	Null_Model_OpenChrom	human
Enhancers_Hnisz2013	BI_CD4_Naive_Primary_7pool	Enhancer	7377	64679	0.114056	2354.5	165.435	30.3594	3.13315	9.43945e-203	2.36081e-199	Null_Model_OpenChrom	human
Roadmapepigenomics_ActiveChromatin	H9_Derived_Neuronal_Progenitor	ActiveChromatin	24448	64679	0.37799	13286.8	367.662	30.3573	1.84003	1.00615e-202	2.51638e-199	Null_Model_OpenChrom	human
Roadmapepigenomics_Histone_narrow	NH-A_Astrocytes	H3K4me2	26731	64679	0.413287	14927.4	388.862	30.3543	1.79073	1.10344e-202	2.7597e-199	Null_Model_OpenChrom	human
Enhancers_Hnisz2013	BI_CD8_Memory_7pool	Enhancer	12401	64679	0.191731	4797.42	250.504	30.3531	2.58493	1.14177e-202	2.85556e-199	Null_Model_OpenChrom	human
Roadmapepigenomics_Histone_narrow	Brain_Mid_Frontal_Lobe	H3K27ac	25320	64679	0.391472	14025.3	372.259	30.3409	1.80531	1.65487e-202	4.13883e-199	Null_Model_OpenChrom	human
Roadmapepigenomics_Histone_narrow	HSMMtube_Skeletal_Muscle_Myotubes_Derived_from_HSMM	H3K9ac	19427	64679	0.30036	9549.96	325.565	30.3382	2.03425	1.7988e-202	4.4988e-199	Null_Model_OpenChrom	human
Roadmapepigenomics_Histone_narrow	H1_Derived_Mesenchymal_Stem_Cells	H3K18ac	21035	64679	0.325221	10651.4	342.283	30.3363	1.97486	1.90576e-202	4.76631e-199	Null_Model_OpenChrom	human
Roadmapepigenomics_Histone_narrow	K562_Leukemia	H3K79me2	13239	64679	0.204688	5616.08	251.296	30.3344	2.35734	2.01812e-202	5.04732e-199	Null_Model_OpenChrom	human
Roadmapepigenomics_ActiveChromatin	ES-I3	ActiveChromatin	29602	64679	0.457676	17616	395.222	30.3273	1.68041	2.50375e-202	6.26189e-199	Null_Model_OpenChrom	human
Roadmapepigenomics_ActiveChromatin	Brain_Germinal_Matrix	10_TssBiv	5776	64679	0.0893026	1589.31	138.072	30.3225	3.63427	2.89371e-202	7.23718e-199	Null_Model_OpenChrom	human
Roadmapepigenomics_Histone_narrow	Brain_Inferior_Temporal_Lobe	H3K27ac	24647	64679	0.381066	13621.5	363.683	30.3161	1.80942	3.51372e-202	8.78781e-199	Null_Model_OpenChrom	human
EBV_Enhancers	LCLs	EnhancersT3	3157	64679	0.0488103	613.817	83.928	30.3019	5.14323	5.40399e-202	1.35154e-198	Null_Model_OpenChrom	human
Roadmapepigenomics_Histone_narrow	H1_BMP4_Derived_Trophoblast_Cultured_Cells	H3K79me2	16337	64679	0.252586	7588.44	288.792	30.2937	2.15288	6.94811e-202	1.73772e-198	Null_Model_OpenChrom	human
Roadmapepigenomics_ActiveChromatin	Fetal_Adrenal_Gland	ActiveChromatin	30600	64679	0.473106	18876.6	387.002	30.2929	1.62106	7.11691e-202	1.77994e-198	Null_Model_OpenChrom	human
BroadChromHMM	HUVEC	WeakPromoter	6813	64679	0.105336	2039.12	157.596	30.2919	3.34115	7.33305e-202	1.834e-198	Null_Model_OpenChrom	human
Roadmapepigenomics_Histone_narrow	HUES6_Cell_Line	H3K27ac	13825	64679	0.213748	5971.46	259.29	30.2886	2.31518	8.0945e-202	2.02443e-198	Null_Model_OpenChrom	human
Roadmapepigenomics_Histone_narrow	Stomach_Smooth_Muscle	H3K27ac	20085	64679	0.310534	10288.1	323.461	30.2879	1.95226	8.27691e-202	2.07006e-198	Null_Model_OpenChrom	human
Roadmapepigenomics_ActiveChromatin	H1	ActiveChromatin	27302	64679	0.422115	15626.8	385.531	30.2835	1.74713	9.46276e-202	2.36664e-198	Null_Model_OpenChrom	human
Roadmapepigenomics_Histone_narrow	H1_BMP4_Derived_Mesendoderm_Cultured_Cells	H3K27ac	16408	64679	0.253684	7706.29	287.368	30.2808	2.12917	1.02657e-201	2.56745e-198	Null_Model_OpenChrom	human
Roadmapepigenomics_ActiveChromatin	H1_BMP4_Derived_Mesendoderm	ActiveChromatin	19365	64679	0.299402	9827.37	315.106	30.268	1.97052	1.51299e-201	3.78398e-198	Null_Model_OpenChrom	human
Roadmapepigenomics_Histone_narrow	HUES64_Cell_Line	H3K27ac	15252	64679	0.235811	6881.13	276.568	30.267	2.2165	1.56041e-201	3.9026e-198	Null_Model_OpenChrom	human
Enhancers_Hnisz2013	BI_CD34_Primary_RO01536	Enhancer	14586	64679	0.225514	6495.97	267.295	30.2663	2.24539	1.59184e-201	3.9812e-198	Null_Model_OpenChrom	human
Roadmapepigenomics_Histone_narrow	Fetal_Muscle_Leg	H3K27ac	21881	64679	0.338301	11510.8	342.722	30.2584	1.90091	2.02397e-201	5.06195e-198	Null_Model_OpenChrom	human
Roadmapepigenomics_Histone_narrow	Aorta	H3K27ac	16630	64679	0.257116	7897.7	288.65	30.2522	2.10568	2.4389e-201	6.0997e-198	Null_Model_OpenChrom	human
Roadmapepigenomics_ActiveChromatin	CD4+_CD25-_CD45RO+_Memory_Primary	7_Enh	15150	64679	0.234234	6963.08	270.633	30.251	2.17576	2.52832e-201	6.32332e-198	Null_Model_OpenChrom	human
Roadmapepigenomics_ActiveChromatin	Placenta_Amnion	ActiveChromatin	22030	64679	0.340605	11570.4	345.783	30.2491	1.904	2.67853e-201	6.699e-198	Null_Model_OpenChrom	human
Roadmapepigenomics_Histone_narrow	CD3_Primary_Cells_Cord_BI	H3K4me1	14230	64679	0.22001	6257.4	263.574	30.248	2.27411	2.77151e-201	6.93155e-198	Null_Model_OpenChrom	human
Roadmapepigenomics_Histone_narrow	Right_Ventricle	H3K27ac	23626	64679	0.365281	13112.1	347.605	30.2466	1.80184	2.89267e-201	7.23458e-198	Null_Model_OpenChrom	human
Roadmapepigenomics_Histone_narrow	Skeletal_Muscle_Female	H3K27ac	22398	64679	0.346295	11834	349.299	30.2436	1.89269	3.16737e-201	7.9216e-198	Null_Model_OpenChrom	human
Roadmapepigenomics_Histone_narrow	HUES48_Cell_Line	H3K27ac	18713	64679	0.289321	9743.83	296.59	30.2409	1.9205	3.43282e-201	8.58547e-198	Null_Model_OpenChrom	human
Roadmapepigenomics_Histone_narrow	IMR90_Cell_Line	H4K8ac	19824	64679	0.306498	10173.8	319.128	30.2394	1.94854	3.59317e-201	8.98652e-198	Null_Model_OpenChrom	human
Roadmapepigenomics_ActiveChromatin	iPS-18	ActiveChromatin	26871	64679	0.415452	15561.3	374.017	30.2384	1.72678	3.7059e-201	9.26846e-198	Null_Model_OpenChrom	human
Roadmapepigenomics_ActiveChromatin	HUES64	ActiveChromatin	27156	64679	0.419858	15657.8	380.263	30.2374	1.73434	3.81527e-201	9.54199e-198	Null_Model_OpenChrom	human
Roadmapepigenomics_Histone_narrow	H1_Derived_Mesenchymal_Stem_Cells	H2BK120ac	16340	64679	0.252632	7814.33	281.961	30.2371	2.09103	3.86045e-201	9.65499e-198	Null_Model_OpenChrom	human
Roadmapepigenomics_ActiveChromatin	iPS-20b	ActiveChromatin	25923	64679	0.400795	14796.9	367.978	30.2359	1.75193	3.99739e-201	9.99747e-198	Null_Model_OpenChrom	human
Roadmapepigenomics_Histone_narrow	Fetal_Muscle_Trunk	H3K27ac	18029	64679	0.278746	8928.21	301.008	30.2344	2.01933	4.18935e-201	1.04776e-197	Null_Model_OpenChrom	human
Roadmapepigenomics_ActiveChromatin	Brain_Germinal_Matrix	ActiveChromatin	23368	64679	0.361292	12739.4	351.589	30.2301	1.8343	4.76899e-201	1.19273e-197	Null_Model_OpenChrom	human
Roadmapepigenomics_Histone_narrow	Colonic_Mucosa	H3K4me1	21757	64679	0.336384	11698.8	332.728	30.2295	1.85977	4.85013e-201	1.21302e-197	Null_Model_OpenChrom	human
Roadmapepigenomics_ActiveChromatin	Fetal_Muscle_Leg	2_TssAFlnk	5441	64679	0.0841231	1446.24	132.197	30.2183	3.76218	6.81894e-201	1.70542e-197	Null_Model_OpenChrom	human
Roadmapepigenomics_ActiveChromatin	Fetal_Stomach	ActiveChromatin	27315	64679	0.422316	16351	362.856	30.2159	1.67054	7.32388e-201	1.8317e-197	Null_Model_OpenChrom	human
Roadmapepigenomics_ActiveChromatin	HepG2_Hepatocellular_Carcinoma	ActiveChromatin	29919	64679	0.462577	17873.6	398.678	30.2134	1.67392	7.9037e-201	1.97672e-197	Null_Model_OpenChrom	human
DNaseI_Duke	Chorion	Dnase	27541	64679	0.425811	16131.5	377.642	30.2124	1.70728	8.14958e-201	2.03821e-197	Null_Model_OpenChrom	human
Roadmapepigenomics_ActiveChromatin	Neurosphere_Ganglionic_Eminence_Derived	ActiveChromatin	25410	64679	0.392863	14409.4	364.138	30.2101	1.76344	8.73766e-201	2.18529e-197	Null_Model_OpenChrom	human
Roadmapepigenomics_Histone_narrow	H1_Cell_Line	H3K18ac	17646	64679	0.272824	9046.35	284.689	30.2072	1.95062	9.53023e-201	2.38351e-197	Null_Model_OpenChrom	human
Roadmapepigenomics_Histone_narrow	H1_Derived_Mesenchymal_Stem_Cells	H3K4ac	18867	64679	0.291702	9331.12	315.703	30.2053	2.02194	1.01019e-200	2.52647e-197	Null_Model_OpenChrom	human
BroadChromHMM	NHLF	WeakPromoter	7712	64679	0.119235	2553.97	170.783	30.2023	3.01962	1.10362e-200	2.76016e-197	Null_Model_OpenChrom	human
EBV_Enhancers	LCLs_Tier3	none	3157	64679	0.0488103	613.17	84.2855	30.1811	5.14866	2.09505e-200	5.23973e-197	Null_Model_OpenChrom	human
Roadmapepigenomics_Histone_narrow	H1_BMP4_Derived_Trophoblast_Cultured_Cells	H3K27ac	15022	64679	0.232255	7228.3	258.256	30.1782	2.07822	2.29108e-200	5.73e-197	Null_Model_OpenChrom	human
Roadmapepigenomics_Histone_narrow	Penis_Foreskin_Keratinocyte_Primary_Cells_skin03	H3K27ac	19759	64679	0.305493	10213	316.387	30.172	1.9347	2.75937e-200	6.9012e-197	Null_Model_OpenChrom	human
Roadmapepigenomics_ActiveChromatin	Fetal_Muscle_Trunk	ActiveChromatin	29562	64679	0.457057	18314.8	372.844	30.1661	1.61411	3.30298e-200	8.26075e-197	Null_Model_OpenChrom	human
Roadmapepigenomics_Histone_narrow	Skeletal_Muscle_Female	H3K4me1	29800	64679	0.460737	18244.9	383.121	30.1605	1.63333	3.91132e-200	9.78221e-197	Null_Model_OpenChrom	human
Roadmapepigenomics_Histone_narrow	H9_Cell_Line	H2BK120ac	10329	64679	0.159696	4069.39	207.546	30.1601	2.53822	3.95129e-200	9.88217e-197	Null_Model_OpenChrom	human
Roadmapepigenomics_ActiveChromatin	Ovary	ActiveChromatin	23488	64679	0.363147	13151	342.777	30.1566	1.78602	4.39432e-200	1.09902e-196	Null_Model_OpenChrom	human
Roadmapepigenomics_Histone_narrow	IMR90_Cell_Line	H3K27ac	20283	64679	0.313595	10856.9	312.732	30.1411	1.86821	7.01831e-200	1.75528e-196	Null_Model_OpenChrom	human
Enhancers_Hnisz2013	UCSD_Thymus	Enhancer	9164	64679	0.141684	3415.15	190.742	30.1394	2.68334	7.38688e-200	1.84746e-196	Null_Model_OpenChrom	human
Roadmapepigenomics_Histone_narrow	NHDF-Ad_Adult_Dermal_Fibroblasts	H3K27ac	15072	64679	0.233028	7020.82	267.155	30.1367	2.14676	8.01323e-200	2.00411e-196	Null_Model_OpenChrom	human
DNaseI_Duke	Hepatocytes	Dnase	27275	64679	0.421698	16032.4	373.072	30.1353	1.70125	8.35711e-200	2.09011e-196	Null_Model_OpenChrom	human
Roadmapepigenomics_ActiveChromatin	NHLF_Lung_Fibroblasts	ActiveChromatin	25653	64679	0.39662	14952.5	355.094	30.1343	1.71564	8.60689e-200	2.15258e-196	Null_Model_OpenChrom	human
BroadChromHMM	NHEK	WeakPromoter	6560	64679	0.101424	2076.18	148.859	30.1212	3.15965	1.27774e-199	3.19563e-196	Null_Model_OpenChrom	human
Roadmapepigenomics_Histone_narrow	HSMM_Skeletal_Muscle_Myoblasts	H3K27ac	16554	64679	0.255941	8302.1	273.959	30.121	1.99395	1.28807e-199	3.22147e-196	Null_Model_OpenChrom	human
Roadmapepigenomics_Histone_narrow	IMR90_Cell_Line	H4K5ac	20260	64679	0.313239	10845	312.593	30.1189	1.86814	1.37073e-199	3.42818e-196	Null_Model_OpenChrom	human
Roadmapepigenomics_Histone_narrow	Adipose_Nuclei	H3K27ac	22118	64679	0.341966	12180.6	330.016	30.1118	1.81584	1.6951e-199	4.23944e-196	Null_Model_OpenChrom	human
Roadmapepigenomics_Histone_narrow	H9_Cell_Line	H3K14ac	18653	64679	0.288393	9731.07	296.334	30.1077	1.91685	1.92321e-199	4.80996e-196	Null_Model_OpenChrom	human
Roadmapepigenomics_ActiveChromatin	H1_Derived_Neuronal_Progenitor	ActiveChromatin	21109	64679	0.326366	11389.4	322.887	30.1021	1.85339	2.27394e-199	5.68713e-196	Null_Model_OpenChrom	human
Roadmapepigenomics_ActiveChromatin	Fetal_Brain_Male	ActiveChromatin	22843	64679	0.353175	12876.6	331.171	30.0946	1.774	2.85342e-199	7.1364e-196	Null_Model_OpenChrom	human
Roadmapepigenomics_ActiveChromatin	HSMM_Skeletal_Muscle_Myoblasts	ActiveChromatin	26726	64679	0.41321	16058.4	354.51	30.091	1.6643	3.17435e-199	7.93904e-196	Null_Model_OpenChrom	human
Roadmapepigenomics_Histone_narrow	H1_BMP4_Derived_Trophoblast_Cultured_Cells	H3K4ac	17995	64679	0.27822	9381.41	286.27	30.089	1.91816	3.37237e-199	8.43429e-196	Null_Model_OpenChrom	human
Roadmapepigenomics_Histone_narrow	H1_Cell_Line	H2BK5ac	12879	64679	0.199122	5742.24	237.198	30.0878	2.24285	3.50145e-199	8.75713e-196	Null_Model_OpenChrom	human
Roadmapepigenomics_Histone_narrow	H1_BMP4_Derived_Trophoblast_Cultured_Cells	H3K79me1	19201	64679	0.296866	10194.8	299.332	30.0877	1.88341	3.51123e-199	8.78158e-196	Null_Model_OpenChrom	human
Roadmapepigenomics_ActiveChromatin	H9_Derived_Neuron	ActiveChromatin	24595	64679	0.380263	14136.4	347.842	30.067	1.73983	6.55138e-199	1.6385e-195	Null_Model_OpenChrom	human
Roadmapepigenomics_Histone_narrow	Placenta_Amnion	H3K27ac	11686	64679	0.180677	5038.86	221.09	30.0653	2.31918	6.89211e-199	1.72372e-195	Null_Model_OpenChrom	human
Roadmapepigenomics_ActiveChromatin	H1_Derived_Mesenchymal_Stem_Cells	ActiveChromatin	27885	64679	0.431129	16828	367.788	30.0635	1.65706	7.27315e-199	1.81902e-195	Null_Model_OpenChrom	human
Roadmapepigenomics_ActiveChromatin	Fetal_Intestine_Small	2_TssAFlnk	5973	64679	0.0923484	1896.96	135.645	30.0494	3.14873	1.1121e-198	2.78136e-195	Null_Model_OpenChrom	human
Roadmapepigenomics_Histone_narrow	H1_BMP4_Derived_Trophoblast_Cultured_Cells	H3K14ac	19018	64679	0.294037	10309	289.924	30.0387	1.84479	1.53283e-198	3.83361e-195	Null_Model_OpenChrom	human
Roadmapepigenomics_ActiveChromatin	Neurosphere_Cortex_Derived	ActiveChromatin	26610	64679	0.411416	15875.3	357.437	30.0324	1.67619	1.85236e-198	4.63275e-195	Null_Model_OpenChrom	human
Enhancers_Hnisz2013	CD14	Enhancer	19437	64679	0.300515	10598.1	294.392	30.0243	1.83401	2.36368e-198	5.91156e-195	Null_Model_OpenChrom	human
Roadmapepigenomics_ActiveChromatin	Fetal_Muscle_Leg	ActiveChromatin	32235	64679	0.498384	21023.4	373.529	30.0153	1.53329	3.09666e-198	7.74474e-195	Null_Model_OpenChrom	human
Roadmapepigenomics_Histone_narrow	H1_BMP4_Derived_Mesendoderm_Cultured_Cells	H2BK120ac	12676	64679	0.195983	5704.18	232.287	30.0138	2.22223	3.24002e-198	8.1033e-195	Null_Model_OpenChrom	human
Roadmapepigenomics_Histone_narrow	Dnd41_TCell_Leukemia	H3K79me2	15050	64679	0.232688	7403.93	254.778	30.0107	2.03271	3.55543e-198	8.89212e-195	Null_Model_OpenChrom	human
Roadmapepigenomics_ActiveChromatin	Fetal_Brain_Male	2_TssAFlnk	6132	64679	0.0948067	1966.9	138.8	30.0079	3.11759	3.86841e-198	9.6749e-195	Null_Model_OpenChrom	human
Roadmapepigenomics_ActiveChromatin	Chondrocytes_from_Bone_Marrow_Derived_Mesenchymal_Stem_Cell	ActiveChromatin	30523	64679	0.471915	19113.4	380.367	29.9963	1.59694	5.4892e-198	1.37285e-194	Null_Model_OpenChrom	human
Roadmapepigenomics_ActiveChromatin	Fetal_Lung	ActiveChromatin	26493	64679	0.409607	16355.1	337.992	29.9945	1.61986	5.78259e-198	1.44623e-194	Null_Model_OpenChrom	human
Roadmapepigenomics_Histone_narrow	H1_BMP4_Derived_Trophoblast_Cultured_Cells	H2BK5ac	18713	64679	0.289321	10137.8	285.972	29.9863	1.84587	7.40685e-198	1.85245e-194	Null_Model_OpenChrom	human
Roadmapepigenomics_ActiveChromatin	IMR90	ActiveChromatin	30115	64679	0.465607	19036.1	369.512	29.9827	1.582	8.25527e-198	2.06464e-194	Null_Model_OpenChrom	human
Roadmapepigenomics_Histone_narrow	H1_BMP4_Derived_Trophoblast_Cultured_Cells	H4K91ac	20352	64679	0.314662	11432.2	297.581	29.9743	1.78023	1.06265e-197	2.65769e-194	Null_Model_OpenChrom	human
Roadmapepigenomics_Histone_narrow	Fetal_Adrenal_Gland	H3K27ac	21194	64679	0.32768	11898.9	310.146	29.97	1.78117	1.20702e-197	3.01876e-194	Null_Model_OpenChrom	human
Roadmapepigenomics_Histone_narrow	Penis_Foreskin_Fibroblast_Primary_Cells_skin01	H3K27ac	24766	64679	0.382906	14931.6	328.225	29.9623	1.65863	1.52015e-197	3.80189e-194	Null_Model_OpenChrom	human
Roadmapepigenomics_ActiveChromatin	HSMMtube_Skeletal_Muscle_Myotubes_Derived_from_HSMM	ActiveChromatin	25331	64679	0.391642	15778.2	318.901	29.9555	1.60545	1.86275e-197	4.65874e-194	Null_Model_OpenChrom	human
Roadmapepigenomics_ActiveChromatin	NHEK-Epidermal_Keratinocytes	ActiveChromatin	27811	64679	0.429985	17186.7	354.731	29.9502	1.61817	2.18578e-197	5.46664e-194	Null_Model_OpenChrom	human
Roadmapepigenomics_ActiveChromatin	CD8_Naive_Primary	7_Enh	14642	64679	0.22638	7376.89	242.798	29.9224	1.98485	5.02682e-197	1.25721e-193	Null_Model_OpenChrom	human
Roadmapepigenomics_ActiveChromatin	HMEC_Mammary_Epithelial	ActiveChromatin	27860	64679	0.430743	17372.4	350.575	29.9155	1.6037	6.17915e-197	1.5454e-193	Null_Model_OpenChrom	human
Roadmapepigenomics_ActiveChromatin	NH-A_Astrocytes	ActiveChromatin	26287	64679	0.406422	16343.3	332.627	29.8945	1.60843	1.16137e-196	2.90459e-193	Null_Model_OpenChrom	human
Roadmapepigenomics_Histone_narrow	Penis_Foreskin_Fibroblast_Primary_Cells_skin02	H3K27ac	23923	64679	0.369873	14100.3	328.614	29.8912	1.69663	1.28002e-196	3.20134e-193	Null_Model_OpenChrom	human
Roadmapepigenomics_ActiveChromatin	Brain_Inferior_Temporal_Lobe	2_TssAFlnk	8137	64679	0.125806	3088.14	168.917	29.8895	2.63492	1.34609e-196	3.36658e-193	Null_Model_OpenChrom	human
Roadmapepigenomics_ActiveChromatin	Breast_Myoepithelial	ActiveChromatin	29104	64679	0.449976	18780.3	345.402	29.889	1.54971	1.36817e-196	3.4218e-193	Null_Model_OpenChrom	human
Roadmapepigenomics_ActiveChromatin	Osteoblasts	ActiveChromatin	28320	64679	0.437855	17936.1	347.787	29.857	1.57894	3.55839e-196	8.89954e-193	Null_Model_OpenChrom	human
Roadmapepigenomics_Histone_narrow	H1_BMP4_Derived_Trophoblast_Cultured_Cells	H3K18ac	20543	64679	0.317615	11597	299.635	29.8564	1.77141	3.62161e-196	9.05764e-193	Null_Model_OpenChrom	human
Roadmapepigenomics_Histone_narrow	IMR90_Cell_Line	H2BK5ac	16920	64679	0.2616	8885.76	269.1	29.856	1.90417	3.67334e-196	9.18702e-193	Null_Model_OpenChrom	human
Roadmapepigenomics_Histone_narrow	Ovary	H3K27ac	15973	64679	0.246958	8304.63	256.962	29.8424	1.92339	5.50906e-196	1.37782e-192	Null_Model_OpenChrom	human
Roadmapepigenomics_Histone_narrow	H1_BMP4_Derived_Trophoblast_Cultured_Cells	H2BK120ac	19772	64679	0.305694	11064.6	291.782	29.8421	1.78696	5.56072e-196	1.39074e-192	Null_Model_OpenChrom	human
Roadmapepigenomics_ActiveChromatin	Penis_Foreskin_Keratinocyte_Primary_skin03	ActiveChromatin	28699	64679	0.443714	18437.3	343.916	29.838	1.55658	6.28563e-196	1.57204e-192	Null_Model_OpenChrom	human
Roadmapepigenomics_ActiveChromatin	Breast_vHMEC	ActiveChromatin	26182	64679	0.404799	16660.3	319.15	29.8344	1.57152	6.99141e-196	1.74855e-192	Null_Model_OpenChrom	human
Roadmapepigenomics_Histone_narrow	H1_Derived_Mesenchymal_Stem_Cells	H3K23ac	15407	64679	0.238207	8023.46	247.65	29.8144	1.92024	1.27091e-195	3.17854e-192	Null_Model_OpenChrom	human
Roadmapepigenomics_ActiveChromatin	Penis_Foreskin_Keratinocyte_Primary_skin02	ActiveChromatin	28251	64679	0.436788	18143.9	339.078	29.8076	1.55705	1.55609e-195	3.89177e-192	Null_Model_OpenChrom	human
Roadmapepigenomics_Histone_narrow	Fetal_Placenta	H3K4me1	24080	64679	0.3723	14680.9	315.405	29.8	1.64022	1.95209e-195	4.88218e-192	Null_Model_OpenChrom	human
Roadmapepigenomics_ActiveChromatin	Penis_Foreskin_Fibroblast_Primary_skin02	ActiveChromatin	29000	64679	0.448368	18300.3	359.069	29.7984	1.58467	2.04936e-195	5.12544e-192	Null_Model_OpenChrom	human
Roadmapepigenomics_ActiveChromatin	Fetal_Heart	ActiveChromatin	26120	64679	0.403841	16337.3	328.334	29.7949	1.59879	2.27508e-195	5.68998e-192	Null_Model_OpenChrom	human
Roadmapepigenomics_ActiveChromatin	Bone_Marrow_Derived_Mesenchymal_Stem_Cell	ActiveChromatin	27380	64679	0.423321	17227	340.879	29.7848	1.58937	3.0741e-195	7.68831e-192	Null_Model_OpenChrom	human
Enhancers_Hnisz2013	BI_CD34_Primary_RO01480	Enhancer	5950	64679	0.0919928	2004.8	132.568	29.7597	2.96788	6.48676e-195	1.62234e-191	Null_Model_OpenChrom	human
Roadmapepigenomics_ActiveChromatin	CD4+_CD25+_CD127-_Treg_Primary	3_TxFlnk	2800	64679	0.0432907	592.891	74.17	29.7574	4.72262	6.94513e-195	1.73698e-191	Null_Model_OpenChrom	human
Roadmapepigenomics_ActiveChromatin	Muscle_Satellite	ActiveChromatin	28292	64679	0.437422	18089	342.896	29.7554	1.56405	7.37211e-195	1.84376e-191	Null_Model_OpenChrom	human
Roadmapepigenomics_ActiveChromatin	CD4_Memory_Primary	7_Enh	14699	64679	0.227261	7505.61	241.767	29.7533	1.9584	7.85085e-195	1.9635e-191	Null_Model_OpenChrom	human
Roadmapepigenomics_ActiveChromatin	CD4+_CD25-_IL17+_PMA-Ionomcyin_stimulated_Th17_Primary	7_Enh	12814	64679	0.198117	6295.14	219.15	29.7461	2.03554	9.74541e-195	2.43733e-191	Null_Model_OpenChrom	human
Roadmapepigenomics_Histone_narrow	H9_Cell_Line	H2BK5ac	6029	64679	0.0932142	2108.73	131.827	29.738	2.85906	1.24018e-194	3.1017e-191	Null_Model_OpenChrom	human
Enhancers_Hnisz2013	BI_CD34_Primary_RO01549	Enhancer	6885	64679	0.106449	2512.53	147.035	29.7377	2.74027	1.24905e-194	3.12388e-191	Null_Model_OpenChrom	human
Roadmapepigenomics_Histone_narrow	NH-A_Astrocytes	H3K27ac	18749	64679	0.289878	10475.3	278.231	29.7366	1.78982	1.29062e-194	3.22783e-191	Null_Model_OpenChrom	human
Roadmapepigenomics_Histone_narrow	IMR90_Cell_Line	H3K4ac	18546	64679	0.286739	10583.6	267.906	29.7207	1.75233	2.07131e-194	5.18036e-191	Null_Model_OpenChrom	human
Roadmapepigenomics_ActiveChromatin	Brain_Anterior_Caudate	2_TssAFlnk	8072	64679	0.124801	3343.34	159.121	29.7175	2.41436	2.28367e-194	5.71146e-191	Null_Model_OpenChrom	human
Roadmapepigenomics_ActiveChromatin	4star	ActiveChromatin	25974	64679	0.401583	16386.6	322.625	29.7169	1.58508	2.32132e-194	5.80563e-191	Null_Model_OpenChrom	human
Roadmapepigenomics_Histone_narrow	H1_Derived_Mesenchymal_Stem_Cells	H4K91ac	18868	64679	0.291718	10654.4	276.427	29.7136	1.77092	2.56303e-194	6.41014e-191	Null_Model_OpenChrom	human
Roadmapepigenomics_ActiveChromatin	H1_BMP4_Derived_Trophoblast	ActiveChromatin	24860	64679	0.38436	15318.1	321.291	29.6986	1.62291	4.00568e-194	1.00182e-190	Null_Model_OpenChrom	human
Enhancers_Hnisz2013	Jurkat	Enhancer	8124	64679	0.125605	3322.66	161.693	29.6942	2.44503	4.56629e-194	1.14203e-190	Null_Model_OpenChrom	human
Roadmapepigenomics_ActiveChromatin	CD4_Naive_Primary	7_Enh	12861	64679	0.198844	6444.77	216.173	29.681	1.99557	6.74772e-194	1.6876e-190	Null_Model_OpenChrom	human
Roadmapepigenomics_Histone_narrow	H9_Cell_Line	H3T11ph	8350	64679	0.129099	3563.51	161.338	29.6675	2.3432	1.00981e-193	2.52554e-190	Null_Model_OpenChrom	human
Roadmapepigenomics_ActiveChromatin	Penis_Foreskin_Fibroblast_Primary_skin01	ActiveChromatin	31081	64679	0.480542	20805.9	346.409	29.6617	1.49385	1.19724e-193	2.99431e-190	Null_Model_OpenChrom	human
Roadmapepigenomics_Histone_narrow	H1_Derived_Mesenchymal_Stem_Cells	H2BK5ac	10773	64679	0.166561	5056.07	192.748	29.6601	2.1307	1.25531e-193	3.13954e-190	Null_Model_OpenChrom	human
Roadmapepigenomics_Histone_narrow	Stomach_Smooth_Muscle	H3K4me1	22511	64679	0.348042	13490.6	304.198	29.6529	1.66864	1.55421e-193	3.88707e-190	Null_Model_OpenChrom	human
Roadmapepigenomics_ActiveChromatin	Brain_Cingulate_Gyrus	2_TssAFlnk	7746	64679	0.119761	3030.77	159.024	29.651	2.55578	1.64557e-193	4.11556e-190	Null_Model_OpenChrom	human
Roadmapepigenomics_ActiveChromatin	Brain_Hippocampus_Middle	2_TssAFlnk	8701	64679	0.134526	3601.24	172.01	29.6481	2.41612	1.79478e-193	4.48875e-190	Null_Model_OpenChrom	human
Roadmapepigenomics_Histone_narrow	H1_Derived_Neuronal_Progenitor_Cultured_Cells	H3K18ac	19538	64679	0.302076	11494.3	271.31	29.6475	1.69979	1.82445e-193	4.56296e-190	Null_Model_OpenChrom	human
Roadmapepigenomics_ActiveChromatin	CD8_Memory_Primary	7_Enh	12720	64679	0.196664	6263.91	217.837	29.6373	2.03068	2.47422e-193	6.18803e-190	Null_Model_OpenChrom	human
Roadmapepigenomics_ActiveChromatin	iPS_DF_19.11	ActiveChromatin	26872	64679	0.415467	17551.6	314.824	29.6051	1.53103	6.43244e-193	1.60875e-189	Null_Model_OpenChrom	human
Roadmapepigenomics_ActiveChromatin	hESC_Derived_CD184+_Endoderm	ActiveChromatin	23365	64679	0.361246	14553	297.723	29.5979	1.60551	7.95963e-193	1.9907e-189	Null_Model_OpenChrom	human
Roadmapepigenomics_Histone_narrow	H1_Derived_Mesenchymal_Stem_Cells	H3K27ac	15266	64679	0.236027	8186	239.207	29.5978	1.86489	7.97323e-193	1.9941e-189	Null_Model_OpenChrom	human
Roadmapepigenomics_ActiveChromatin	NHDF-Ad_Adult_Dermal_Fibroblasts	ActiveChromatin	27102	64679	0.419023	17662.5	319.175	29.5748	1.53444	1.57809e-192	3.94682e-189	Null_Model_OpenChrom	human
Roadmapepigenomics_Histone_narrow	H9_Cell_Line	H4K5ac	9205	64679	0.142318	4058.76	174.126	29.5548	2.26793	2.85086e-192	7.13e-189	Null_Model_OpenChrom	human
SuperEnhancers_Hnisz2013	CD20	SuperEnhancer	6699	64679	0.103573	2604.07	138.673	29.5295	2.57251	6.02881e-192	1.50781e-188	Null_Model_OpenChrom	human
Roadmapepigenomics_Histone_narrow	Osteoblasts	H3K27ac	20913	64679	0.323335	12666.9	279.276	29.5269	1.651	6.50911e-192	1.62793e-188	Null_Model_OpenChrom	human
Roadmapepigenomics_ActiveChromatin	CD4+_CD25-_Th_Primary	7_Enh	12985	64679	0.200761	6755.92	210.992	29.5228	1.92202	7.3408e-192	1.83593e-188	Null_Model_OpenChrom	human
Roadmapepigenomics_Histone_narrow	H1_Derived_Neuronal_Progenitor_Cultured_Cells	H3K9ac	20597	64679	0.31845	12421.8	276.974	29.5161	1.65813	8.94285e-192	2.23661e-188	Null_Model_OpenChrom	human
Roadmapepigenomics_ActiveChromatin	CD34_Primary	7_Enh	14955	64679	0.231219	7975.59	236.499	29.5113	1.8751	1.02953e-191	2.57486e-188	Null_Model_OpenChrom	human
Enhancers_Hnisz2013	UCSD_Spleen	Enhancer	18986	64679	0.293542	11187.8	264.275	29.508	1.69703	1.13545e-191	2.83976e-188	Null_Model_OpenChrom	human
Roadmapepigenomics_ActiveChromatin	Fetal_Lung	2_TssAFlnk	6621	64679	0.102367	2519.28	139.039	29.5005	2.62813	1.41952e-191	3.55023e-188	Null_Model_OpenChrom	human
Roadmapepigenomics_ActiveChromatin	CD4+_CD25int_CD127+_Tmem_Primary	7_Enh	9404	64679	0.145395	4301.89	172.968	29.4974	2.18602	1.55516e-191	3.88946e-188	Null_Model_OpenChrom	human
Roadmapepigenomics_Histone_narrow	H1_Cell_Line	H4K8ac	22682	64679	0.350686	13950.9	296.184	29.4785	1.62584	2.71549e-191	6.79144e-188	Null_Model_OpenChrom	human
Roadmapepigenomics_Histone_narrow	Monocytes-CD14+_RO01746	H3K79me2	15305	64679	0.23663	8317.91	237.04	29.4764	1.84001	2.88863e-191	7.22446e-188	Null_Model_OpenChrom	human
Roadmapepigenomics_Histone_narrow	H1_BMP4_Derived_Mesendoderm_Cultured_Cells	H2BK5ac	6379	64679	0.0986255	2413.99	134.583	29.4615	2.64251	4.48078e-191	1.12064e-187	Null_Model_OpenChrom	human
SuperEnhancers_Hnisz2013	CD19_primary	SuperEnhancer	4097	64679	0.0633436	1231.23	97.2927	29.4551	3.32756	5.41554e-191	1.35443e-187	Null_Model_OpenChrom	human
Roadmapepigenomics_Histone_narrow	IMR90_Cell_Line	H3K14ac	14791	64679	0.228683	8173.39	224.831	29.4337	1.80965	1.0165e-190	2.54226e-187	Null_Model_OpenChrom	human
Roadmapepigenomics_ActiveChromatin	Brain_Angular_Gyrus	2_TssAFlnk	6115	64679	0.0945438	2386.67	126.677	29.4319	2.56214	1.07428e-190	2.68678e-187	Null_Model_OpenChrom	human
Roadmapepigenomics_Histone_narrow	IMR90_Cell_Line	H3K18ac	18961	64679	0.293155	11374.9	257.776	29.4291	1.66692	1.16448e-190	2.91236e-187	Null_Model_OpenChrom	human
Roadmapepigenomics_Histone_narrow	HSMMtube_Skeletal_Muscle_Myotubes_Derived_from_HSMM	H3K27ac	18640	64679	0.288192	11037.1	258.391	29.4242	1.68886	1.34668e-190	3.36805e-187	Null_Model_OpenChrom	human
Roadmapepigenomics_ActiveChromatin	Fetal_Intestine_Large	2_TssAFlnk	5366	64679	0.0829636	1867.55	118.96	29.4086	2.87328	2.13416e-190	5.33753e-187	Null_Model_OpenChrom	human
Roadmapepigenomics_ActiveChromatin	hESC_Derived_CD56+_Ectoderm	ActiveChromatin	23203	64679	0.358741	14476.2	296.759	29.4071	1.60284	2.22814e-190	5.57259e-187	Null_Model_OpenChrom	human
Roadmapepigenomics_ActiveChromatin	hESC_Derived_CD56+_Mesoderm	ActiveChromatin	23871	64679	0.369069	15292.4	291.784	29.4005	1.56097	2.70937e-190	6.77614e-187	Null_Model_OpenChrom	human
Roadmapepigenomics_ActiveChromatin	CD14_Primary	7_Enh	15978	64679	0.247035	9058.66	235.932	29.3277	1.76384	2.30293e-189	5.75963e-186	Null_Model_OpenChrom	human
Roadmapepigenomics_Histone_narrow	Stomach_Mucosa	H3K4me1	23307	64679	0.360349	15071.7	280.863	29.3216	1.54641	2.75212e-189	6.88304e-186	Null_Model_OpenChrom	human
Roadmapepigenomics_Histone_narrow	Skeletal_Muscle_Male	H3K4me1	23352	64679	0.361045	14743.1	293.713	29.3105	1.58392	3.81243e-189	9.53489e-186	Null_Model_OpenChrom	human
Roadmapepigenomics_Histone_narrow	CD4+_CD25-_IL17+_PMA-Ionomcyin_stimulated_Th17_Primary_Cells	H3K36me3	14130	64679	0.218463	7709.06	219.084	29.3082	1.83291	4.08015e-189	1.02045e-185	Null_Model_OpenChrom	human
Roadmapepigenomics_Histone_narrow	hESC_Derived_CD56+_Ectoderm_Cultured_Cells	H3K27ac	14620	64679	0.226039	7872.64	230.226	29.3075	1.85706	4.1584e-189	1.04002e-185	Null_Model_OpenChrom	human
Roadmapepigenomics_Histone_narrow	IMR90_Cell_Line	H4K91ac	17553	64679	0.271386	10360.6	245.472	29.3003	1.69421	5.14336e-189	1.28635e-185	Null_Model_OpenChrom	human
Roadmapepigenomics_ActiveChromatin	CD3_Primary_Peripheral_UW	7_Enh	11773	64679	0.182022	5919.33	199.838	29.2921	1.98891	6.53179e-189	1.6336e-185	Null_Model_OpenChrom	human
Roadmapepigenomics_ActiveChromatin	Esophagus	2_TssAFlnk	4450	64679	0.0688013	1475.57	101.582	29.2812	3.01578	9.00454e-189	2.25204e-185	Null_Model_OpenChrom	human
Roadmapepigenomics_ActiveChromatin	Mesenchymal_Stem_Cell_Derived_Adipocyte	ActiveChromatin	27949	64679	0.432119	19036	304.402	29.2804	1.46822	9.20291e-189	2.30165e-185	Null_Model_OpenChrom	human
Roadmapepigenomics_Histone_narrow	IMR90_Cell_Line	H3K23ac	13247	64679	0.204811	7192.3	206.806	29.2772	1.84183	1.01298e-188	2.53346e-185	Null_Model_OpenChrom	human
Roadmapepigenomics_ActiveChromatin	Brain_Dorsolateral_Prefrontal_Cortex	2_TssAFlnk	6163	64679	0.095286	2479.94	125.835	29.269	2.48515	1.28624e-188	3.21688e-185	Null_Model_OpenChrom	human
Enhancers_Hnisz2013	UCSD_Sigmoid_Colon	Enhancer	15721	64679	0.243062	8989.26	229.998	29.2688	1.74886	1.29617e-188	3.24172e-185	Null_Model_OpenChrom	human
Roadmapepigenomics_ActiveChromatin	Brain_Substantia_Nigra	2_TssAFlnk	6578	64679	0.101702	2641.23	134.569	29.2546	2.49051	1.96197e-188	4.90689e-185	Null_Model_OpenChrom	human
Roadmapepigenomics_ActiveChromatin	CD4+_CD25+_CD127-_Treg_Primary	7_Enh	9126	64679	0.141097	4334.23	163.912	29.2337	2.10556	3.61797e-188	9.04855e-185	Null_Model_OpenChrom	human
Roadmapepigenomics_ActiveChromatin	CD4+_CD25-_IL17-_PMA-Ionomycin_stimulated_MACS_purified_Th_Primary	7_Enh	12698	64679	0.196323	6676.53	206.037	29.2252	1.90189	4.64641e-188	1.16207e-184	Null_Model_OpenChrom	human
Roadmapepigenomics_ActiveChromatin	CD4+_CD25-_CD45RA+_Naive_Primary	7_Enh	12171	64679	0.188175	6480.15	195.01	29.1823	1.8782	1.62693e-187	4.06894e-184	Null_Model_OpenChrom	human
Roadmapepigenomics_Histone_narrow	H9_Cell_Line	H3K27ac	11841	64679	0.183073	6192.8	193.639	29.1687	1.91206	2.41701e-187	6.04494e-184	Null_Model_OpenChrom	human
Roadmapepigenomics_Histone_narrow	Chondrocytes_from_Bone_Marrow_Derived_Mesenchymal_Stem_Cell_Cultured_Cells	H3K27ac	20049	64679	0.309977	12598.2	255.963	29.1089	1.59142	1.38463e-186	3.46296e-183	Null_Model_OpenChrom	human
Roadmapepigenomics_ActiveChromatin	Dnd41_TCell_Leukemia	7_Enh	8882	64679	0.137324	4131.73	163.199	29.1073	2.14971	1.45215e-186	3.63183e-183	Null_Model_OpenChrom	human
Roadmapepigenomics_Histone_narrow	Spleen	H3K4me1	24932	64679	0.385473	16392.6	293.706	29.0747	1.52093	3.75008e-186	9.37895e-183	Null_Model_OpenChrom	human
Roadmapepigenomics_Histone_narrow	H1_Derived_Mesenchymal_Stem_Cells	H2BK12ac	18416	64679	0.284729	11108.9	251.376	29.0686	1.65778	4.48171e-186	1.12088e-182	Null_Model_OpenChrom	human
Roadmapepigenomics_Histone_narrow	Brain_Hippocampus_Middle	H3K4me1	24921	64679	0.385303	16539.3	288.368	29.0659	1.50677	4.84713e-186	1.21227e-182	Null_Model_OpenChrom	human
Roadmapepigenomics_Histone_narrow	HUVEC_Umbilical_Vein_Endothelial_Cells	H3K4me1	19593	64679	0.302927	12201.2	254.503	29.044	1.60582	9.16032e-186	2.291e-182	Null_Model_OpenChrom	human
Roadmapepigenomics_Histone_narrow	H9_Cell_Line	H4K8ac	8555	64679	0.132269	4108.74	153.307	29.0023	2.08214	3.07323e-185	7.68615e-182	Null_Model_OpenChrom	human
Roadmapepigenomics_ActiveChromatin	Adipose_Derived_Mesenchymal_Stem_Cell	ActiveChromatin	30909	64679	0.477883	22085.7	304.5	28.9764	1.3995	6.52911e-185	1.63293e-181	Null_Model_OpenChrom	human
Roadmapepigenomics_Histone_narrow	hESC_Derived_CD56+_Mesoderm_Cultured_Cells	H3K27ac	17643	64679	0.272778	10709.3	239.656	28.9319	1.64744	2.37281e-184	5.9344e-181	Null_Model_OpenChrom	human
FANTOM5_enhancer_cell	lymphocyte_of_B_lineage	Enhancer	1161	64679	0.0179502	188.419	33.6475	28.905	6.16181	5.16998e-184	1.29301e-180	Null_Model_OpenChrom	human
Roadmapepigenomics_ActiveChromatin	Brain_Germinal_Matrix	2_TssAFlnk	6281	64679	0.0971103	2732.73	122.777	28.9001	2.29844	5.94957e-184	1.48799e-180	Null_Model_OpenChrom	human
Roadmapepigenomics_Histone_narrow	Brain_Germinal_Matrix	H3K27me3	12233	64679	0.189134	6736.89	190.247	28.8893	1.81582	8.13732e-184	2.03514e-180	Null_Model_OpenChrom	human
Roadmapepigenomics_Histone_narrow	Fetal_Muscle_Trunk	H3K4me1	25872	64679	0.400006	18044.8	271.097	28.8721	1.43376	1.33625e-183	3.34195e-180	Null_Model_OpenChrom	human
Roadmapepigenomics_Histone_narrow	HeLa-S3_Cervical_Carcinoma	H3K79me2	12700	64679	0.196354	7050.14	195.711	28.8683	1.80138	1.49326e-183	3.73465e-180	Null_Model_OpenChrom	human
Roadmapepigenomics_Histone_narrow	Fetal_Adrenal_Gland	H3K4me1	25158	64679	0.388967	17339.3	270.868	28.8654	1.45093	1.62149e-183	4.05535e-180	Null_Model_OpenChrom	human
Roadmapepigenomics_Histone_narrow	Fetal_Brain_Male	H3K4me1	18972	64679	0.293325	12147.3	236.442	28.8642	1.56183	1.67933e-183	4.20001e-180	Null_Model_OpenChrom	human
Enhancers_Hnisz2013	UCSD_Small_Intestine	Enhancer	16140	64679	0.24954	9757.81	221.333	28.8353	1.65406	3.87697e-183	9.69631e-180	Null_Model_OpenChrom	human
Roadmapepigenomics_Histone_narrow	Bone_Marrow_Derived_Mesenchymal_Stem_Cell_Cultured_Cells	H3K27ac	18534	64679	0.286554	11679.6	237.759	28.8291	1.58687	4.63429e-183	1.15904e-179	Null_Model_OpenChrom	human
FANTOM5_enhancer_cell	T_cell	Enhancer	1831	64679	0.028309	422.993	48.842	28.8278	4.32868	4.80887e-183	1.2027e-179	Null_Model_OpenChrom	human
Roadmapepigenomics_Histone_narrow	H1_BMP4_Derived_Mesendoderm_Cultured_Cells	H3K23ac	7289	64679	0.112695	3323.64	137.578	28.8227	2.19308	5.56801e-183	1.39256e-179	Null_Model_OpenChrom	human
Roadmapepigenomics_ActiveChromatin	CD3_Primary_Peripheral_UW	11_BivFlnk	3345	64679	0.0517169	1109.18	77.8524	28.7188	3.01575	1.11236e-181	2.78201e-178	Null_Model_OpenChrom	human
Roadmapepigenomics_Histone_narrow	H1_BMP4_Derived_Trophoblast_Cultured_Cells	H2BK12ac	16481	64679	0.254812	10239.2	217.389	28.7126	1.6096	1.32714e-181	3.31918e-178	Null_Model_OpenChrom	human
Roadmapepigenomics_Histone_narrow	Brain_Inferior_Temporal_Lobe	H3K4me1	17526	64679	0.270969	11016.3	226.725	28.7119	1.59092	1.35413e-181	3.38667e-178	Null_Model_OpenChrom	human
Roadmapepigenomics_Histone_narrow	HepG2_Hepatocellular_Carcinoma	H3K79me2	8434	64679	0.130398	4161.99	148.802	28.7093	2.02643	1.46219e-181	3.65695e-178	Null_Model_OpenChrom	human
Roadmapepigenomics_Histone_narrow	H9_Cell_Line	H3K56ac	8776	64679	0.135685	4493.78	149.53	28.6379	1.95292	1.13522e-180	2.83918e-177	Null_Model_OpenChrom	human
Roadmapepigenomics_Histone_narrow	hESC_Derived_CD184+_Endoderm_Cultured_Cells	H3K27ac	15395	64679	0.238022	9470.62	207.004	28.6197	1.62555	1.91171e-180	4.78119e-177	Null_Model_OpenChrom	human
Roadmapepigenomics_Histone_narrow	Brain_Cingulate_Gyrus	H3K4me1	20829	64679	0.322037	13806.7	245.456	28.6094	1.50862	2.56866e-180	6.42422e-177	Null_Model_OpenChrom	human
Roadmapepigenomics_Histone_narrow	H1_BMP4_Derived_Trophoblast_Cultured_Cells	H2AK5ac	15963	64679	0.246803	9863.14	213.583	28.5597	1.61845	1.0651e-179	2.66381e-176	Null_Model_OpenChrom	human
Roadmapepigenomics_Histone_narrow	Brain_Anterior_Caudate	H3K4me1	21404	64679	0.330927	14691.9	235.042	28.5573	1.45686	1.14092e-179	2.85343e-176	Null_Model_OpenChrom	human
Roadmapepigenomics_ActiveChromatin	Duodenum_Smooth_Muscle	2_TssAFlnk	5699	64679	0.0881121	2396.49	115.701	28.5436	2.37806	1.6858e-179	4.21617e-176	Null_Model_OpenChrom	human
Roadmapepigenomics_Histone_narrow	Penis_Foreskin_Melanocyte_Primary_Cells_skin03	H3K4me1	22863	64679	0.353484	15574.5	255.714	28.5023	1.46797	5.47815e-179	1.37009e-175	Null_Model_OpenChrom	human
Roadmapepigenomics_Histone_narrow	Penis_Foreskin_Fibroblast_Primary_Cells_skin02	H3K4me1	26421	64679	0.408494	18767.8	268.53	28.5005	1.40779	5.77096e-179	1.44332e-175	Null_Model_OpenChrom	human
Roadmapepigenomics_Histone_narrow	K562_Leukemia	H3K4me1	15796	64679	0.244221	9796.62	210.671	28.4775	1.61239	1.1141e-178	2.78636e-175	Null_Model_OpenChrom	human
Roadmapepigenomics_ActiveChromatin	4star	2_TssAFlnk	4200	64679	0.0649361	1597.16	91.4158	28.4725	2.62966	1.28327e-178	3.20945e-175	Null_Model_OpenChrom	human
Roadmapepigenomics_Histone_narrow	Fetal_Muscle_Leg	H3K4me1	25155	64679	0.388921	17911.9	254.402	28.4711	1.40437	1.33707e-178	3.344e-175	Null_Model_OpenChrom	human
Roadmapepigenomics_Histone_narrow	Fetal_Thymus	H3K9me3	11041	64679	0.170705	6023.29	176.241	28.4707	1.83305	1.34936e-178	3.37475e-175	Null_Model_OpenChrom	human
FANTOM5_enhancer_organ	thymus_expressed_enhancers	Enhancer	1004	64679	0.0155228	169.351	29.3307	28.4565	5.92853	2.02216e-178	5.05741e-175	Null_Model_OpenChrom	human
Roadmapepigenomics_Histone_narrow	HMEC_Mammary_Epithelial	H3K79me2	14025	64679	0.21684	8259.22	202.681	28.4476	1.6981	2.60563e-178	6.51668e-175	Null_Model_OpenChrom	human
EBV_Enhancers	LCLs	EnhancersT2	1152	64679	0.017811	209.399	33.1444	28.4393	5.50147	3.30908e-178	8.27601e-175	Null_Model_OpenChrom	human
BroadChromHMM	GM12878	WeakEnhancer	12253	64679	0.189443	7100.54	181.265	28.425	1.72564	4.96958e-178	1.24289e-174	Null_Model_OpenChrom	human
Roadmapepigenomics_ActiveChromatin	Colon_Smooth_Muscle	2_TssAFlnk	5976	64679	0.0923947	2749.43	113.551	28.4152	2.17354	6.56769e-178	1.64258e-174	Null_Model_OpenChrom	human
Roadmapepigenomics_Histone_narrow	NHLF_Lung_Fibroblasts	H3K79me2	11620	64679	0.179656	6710.7	173.006	28.3764	1.73156	1.97461e-177	4.9385e-174	Null_Model_OpenChrom	human
Roadmapepigenomics_Histone_narrow	H1_Cell_Line	H4K91ac	7865	64679	0.121601	3880.1	140.551	28.352	2.02701	3.95849e-177	9.90019e-174	Null_Model_OpenChrom	human
EBV_Enhancers	LCLs_Tier2	none	1152	64679	0.017811	209.375	33.2788	28.3251	5.5021	8.47589e-177	2.11982e-173	Null_Model_OpenChrom	human
EnhancerFinder_Enhancers	Heart	none	8103	64679	0.12528	4117.96	140.74	28.3149	1.96772	1.13202e-176	2.83119e-173	Null_Model_OpenChrom	human
Roadmapepigenomics_Histone_narrow	HeLa-S3_Cervical_Carcinoma	H3K4me1	18224	64679	0.281761	12062.7	217.623	28.3117	1.51077	1.23922e-176	3.0993e-173	Null_Model_OpenChrom	human
Enhancers_Hnisz2013	K562	Enhancer	8260	64679	0.127708	4236.26	142.154	28.3054	1.94983	1.48093e-176	3.70381e-173	Null_Model_OpenChrom	human
Roadmapepigenomics_Histone_narrow	NHEK-Epidermal_Keratinocytes	H3K79me2	13264	64679	0.205074	7996.8	186.213	28.2859	1.65866	2.57282e-176	6.43463e-173	Null_Model_OpenChrom	human
SuperEnhancers_Hnisz2013	MM1S	SuperEnhancer	2678	64679	0.0414045	890.058	63.2648	28.2613	3.00879	5.17514e-176	1.2943e-172	Null_Model_OpenChrom	human
Roadmapepigenomics_ActiveChromatin	Fetal_Brain_Female	2_TssAFlnk	5527	64679	0.0854528	2501.03	107.08	28.2588	2.20989	5.54598e-176	1.38705e-172	Null_Model_OpenChrom	human
Roadmapepigenomics_Histone_narrow	H9_Cell_Line	H2BK12ac	4983	64679	0.077042	2061.87	103.398	28.2514	2.41673	6.83728e-176	1.71e-172	Null_Model_OpenChrom	human
BroadChromHMM	K562	StrongEnhancer	8351	64679	0.129115	4288.94	143.8	28.2479	1.9471	7.54729e-176	1.88758e-172	Null_Model_OpenChrom	human
Roadmapepigenomics_Histone_narrow	Neurosphere_Cultured_Cells_Cortex_Derived	H3K4me1	19574	64679	0.302633	13223.6	224.837	28.2447	1.48024	8.26712e-176	2.06761e-172	Null_Model_OpenChrom	human
Roadmapepigenomics_Histone_narrow	H9_Cell_Line	H2BK15ac	5342	64679	0.0825925	2370.56	105.363	28.202	2.25348	2.76028e-175	6.90346e-172	Null_Model_OpenChrom	human
Roadmapepigenomics_Histone_narrow	Fetal_Intestine_Small	H3K4me1	20972	64679	0.324247	14427.5	232.095	28.1974	1.45361	3.15027e-175	7.87883e-172	Null_Model_OpenChrom	human
Roadmapepigenomics_ActiveChromatin	Breast_Myoepithelial	2_TssAFlnk	5855	64679	0.090524	2731.07	110.823	28.1883	2.14385	4.06615e-175	1.01694e-171	Null_Model_OpenChrom	human
Roadmapepigenomics_Histone_narrow	Brain_Angular_Gyrus	H3K4me1	18935	64679	0.292753	12448.8	230.146	28.183	1.52103	4.72823e-175	1.18253e-171	Null_Model_OpenChrom	human
Roadmapepigenomics_ActiveChromatin	Bone_Marrow_Derived_Mesenchymal_Stem_Cell	2_TssAFlnk	8050	64679	0.124461	4218.4	136.156	28.1414	1.90831	1.52843e-174	3.82261e-171	Null_Model_OpenChrom	human
Enhancers_Hnisz2013	RPMI-8402	Enhancer	5627	64679	0.0869989	2597.45	107.659	28.1402	2.16635	1.58022e-174	3.95213e-171	Null_Model_OpenChrom	human
Enhancers_Hnisz2013	BI_Duodenum_Smooth_Muscle	Enhancer	13019	64679	0.201286	7996.5	178.574	28.1255	1.62809	2.38879e-174	5.97437e-171	Null_Model_OpenChrom	human
Roadmapepigenomics_Histone_narrow	IMR90_Cell_Line	H2BK120ac	14844	64679	0.229503	9449.48	191.968	28.1012	1.57088	4.7386e-174	1.18512e-170	Null_Model_OpenChrom	human
Roadmapepigenomics_ActiveChromatin	Breast_vHMEC	2_TssAFlnk	3630	64679	0.0561233	1402.98	79.2612	28.0972	2.58734	5.30553e-174	1.32691e-170	Null_Model_OpenChrom	human
Roadmapepigenomics_ActiveChromatin	CD3_Primary_Cord_BI	7_Enh	9412	64679	0.145519	5245.23	148.308	28.0955	1.79439	5.56626e-174	1.39212e-170	Null_Model_OpenChrom	human
Roadmapepigenomics_Histone_narrow	Chondrocytes_from_Bone_Marrow_Derived_Mesenchymal_Stem_Cell_Cultured_Cells	H3K4me1	25945	64679	0.401135	18964.4	248.884	28.0474	1.36809	2.14652e-173	5.36845e-170	Null_Model_OpenChrom	human
Roadmapepigenomics_Histone_narrow	Brain_Substantia_Nigra	H3K4me1	19163	64679	0.296279	13143.1	215.126	27.9831	1.45803	1.30319e-172	3.25928e-169	Null_Model_OpenChrom	human
Enhancers_Hnisz2013	HCT-116	Enhancer	9029	64679	0.139597	4999.07	144.135	27.9595	1.80614	2.52815e-172	6.32291e-169	Null_Model_OpenChrom	human
Roadmapepigenomics_ActiveChromatin	CD34	7_Enh	13787	64679	0.21316	8596.49	185.678	27.9544	1.60379	2.91715e-172	7.2958e-169	Null_Model_OpenChrom	human
Roadmapepigenomics_Histone_narrow	HUVEC_Umbilical_Vein_Endothelial_Cells	H3K79me2	11661	64679	0.18029	7052.24	165.094	27.916	1.65352	8.53856e-172	2.13549e-168	Null_Model_OpenChrom	human
Roadmapepigenomics_Histone_narrow	Duodenum_Smooth_Muscle	H3K4me1	18567	64679	0.287064	12624.9	213.17	27.8749	1.47066	2.68964e-171	6.72678e-168	Null_Model_OpenChrom	human
Roadmapepigenomics_Histone_narrow	H1_Cell_Line	H3K14ac	3248	64679	0.0502172	1250.14	71.684	27.8704	2.59811	3.04878e-171	7.625e-168	Null_Model_OpenChrom	human
FANTOM5_enhancer_cell	natural_killer_cell	Enhancer	1378	64679	0.0213052	336.316	37.3765	27.8701	4.09734	3.07772e-171	7.69737e-168	Null_Model_OpenChrom	human
SuperEnhancers_Hnisz2013	BI_CD4_Memory_Primary_7pool	SuperEnhancer	4402	64679	0.0680592	1945.45	88.2016	27.8515	2.26271	5.16785e-171	1.29248e-167	Null_Model_OpenChrom	human
Roadmapepigenomics_Histone_narrow	iPS_DF_6.9_Cell_Line	H3K27ac	5943	64679	0.0918845	2843.72	111.396	27.8222	2.08987	1.16736e-170	2.91957e-167	Null_Model_OpenChrom	human
Roadmapepigenomics_Histone_narrow	NH-A_Astrocytes	H3K79me2	13153	64679	0.203358	8080.97	182.382	27.8099	1.62765	1.64561e-170	4.11567e-167	Null_Model_OpenChrom	human
SuperEnhancers_Hnisz2013	CD56	SuperEnhancer	3798	64679	0.0587208	1549.19	80.8828	27.8033	2.4516	1.98112e-170	4.95478e-167	Null_Model_OpenChrom	human
Roadmapepigenomics_Histone_narrow	H1_Derived_Neuronal_Progenitor_Cultured_Cells	H2BK5ac	17939	64679	0.277354	12180.7	207.666	27.7287	1.47274	1.57523e-169	3.93966e-166	Null_Model_OpenChrom	human
Roadmapepigenomics_Histone_narrow	Osteoblasts	H3K79me2	13798	64679	0.21333	8713.64	183.418	27.7201	1.58349	1.9992e-169	5.00001e-166	Null_Model_OpenChrom	human
Roadmapepigenomics_ActiveChromatin	Fetal_Heart	2_TssAFlnk	5008	64679	0.0774285	2304.43	97.5847	27.7049	2.17321	3.04811e-169	7.62333e-166	Null_Model_OpenChrom	human
Enhancers_Hnisz2013	BI_Brain_Hippocampus_Middle	Enhancer	14790	64679	0.228668	9520.26	190.252	27.6988	1.55353	3.61195e-169	9.03349e-166	Null_Model_OpenChrom	human
Roadmapepigenomics_Histone_narrow	Brain_Mid_Frontal_Lobe	H3K4me1	18528	64679	0.286461	12822	206.062	27.6907	1.44502	4.51714e-169	1.12974e-165	Null_Model_OpenChrom	human
Roadmapepigenomics_Histone_narrow	CD4+_CD25-_CD45RA+_Naive_Primary_Cellsd_	H3K36me3	12117	64679	0.187341	7475.76	167.793	27.6606	1.62084	1.04084e-168	2.60313e-165	Null_Model_OpenChrom	human
BroadChromHMM	HUVEC	StrongEnhancer	10594	64679	0.163794	6450.02	149.927	27.64	1.64247	1.84234e-168	4.6077e-165	Null_Model_OpenChrom	human
Enhancers_Hnisz2013	panc1	Enhancer	8968	64679	0.138654	5002.34	143.515	27.6324	1.79276	2.27411e-168	5.68755e-165	Null_Model_OpenChrom	human
eQTLs	LCLs	none	3352	64679	0.0518252	1337.82	73.1193	27.5466	2.50558	2.43202e-167	6.08249e-164	Null_Model_OpenChrom	human
Enhancers_Hnisz2013	BI_Brain_Anterior_Caudate	Enhancer	13372	64679	0.206744	8499.7	177.014	27.5249	1.57323	4.41987e-167	1.10541e-163	Null_Model_OpenChrom	human
Enhancers_Hnisz2013	BI_Brain_Hippocampus_Middle_150	Enhancer	14692	64679	0.227153	9592.88	185.27	27.5226	1.53155	4.70787e-167	1.17744e-163	Null_Model_OpenChrom	human
Roadmapepigenomics_Histone_narrow	H1_Derived_Neuronal_Progenitor_Cultured_Cells	H2BK120ac	7280	64679	0.112556	3966.74	120.459	27.5053	1.83526	7.59606e-167	1.89978e-163	Null_Model_OpenChrom	human
Roadmapepigenomics_ActiveChromatin	CD15_Primary	11_BivFlnk	2277	64679	0.0352046	769.274	54.8412	27.4926	2.95993	1.07692e-166	2.69336e-163	Null_Model_OpenChrom	human
FANTOM5_enhancer_organ	tonsil_expressed_enhancers	Enhancer	697	64679	0.0107763	118.966	21.053	27.4561	5.85882	2.93995e-166	7.35281e-163	Null_Model_OpenChrom	human
Roadmapepigenomics_Histone_narrow	NH-A_Astrocytes	H3K4me1	22422	64679	0.346666	16423.4	218.601	27.4407	1.36525	4.48187e-166	1.12091e-162	Null_Model_OpenChrom	human
EBV_Enhancers	LCLs	SuperEnhancersAll	843	64679	0.0130336	163.46	24.7834	27.4191	5.15724	8.10915e-166	2.0281e-162	Null_Model_OpenChrom	human
AlleleSpecificBinding	GM12878	none	946	64679	0.0146261	180.297	27.9631	27.3827	5.24691	2.20577e-165	5.51663e-162	Null_Model_OpenChrom	human
Enhancers_Hnisz2013	BI_Brain_Cingulate_Gyrus	Enhancer	13451	64679	0.207965	8690.29	174.034	27.3551	1.54782	4.69551e-165	1.17435e-161	Null_Model_OpenChrom	human
Roadmapepigenomics_Histone_narrow	H1_Derived_Neuronal_Progenitor_Cultured_Cells	H3K14ac	11938	64679	0.184573	7511.8	161.962	27.3286	1.58923	9.69894e-165	2.42571e-161	Null_Model_OpenChrom	human
EBV_Enhancers	LCLs_allmaxscore	none	843	64679	0.0130336	164.091	24.9021	27.2631	5.1374	5.80782e-164	1.45254e-160	Null_Model_OpenChrom	human
Roadmapepigenomics_Histone_narrow	Fetal_Heart	H3K9me3	3173	64679	0.0490577	1232.43	71.245	27.238	2.57459	1.15359e-163	2.88512e-160	Null_Model_OpenChrom	human
Roadmapepigenomics_Histone_narrow	A549_EtOH_0.02pct_Lung_Carcinoma	H3K79me2	13604	64679	0.210331	8675.56	181.062	27.2196	1.56808	1.90489e-163	4.76412e-160	Null_Model_OpenChrom	human
FANTOM5_enhancer_organ	blood_expressed_enhancers	Enhancer	1225	64679	0.0189397	313.543	33.4866	27.2185	3.90695	1.96057e-163	4.90338e-160	Null_Model_OpenChrom	human
Enhancers_Hnisz2013	Colon_Crypt_2	Enhancer	10775	64679	0.166592	6661.95	151.452	27.1575	1.6174	1.03256e-162	2.58243e-159	Null_Model_OpenChrom	human
SuperEnhancers_Hnisz2013	BI_CD4p_CD25-_Il17p_PMAstim_Th17	SuperEnhancer	3965	64679	0.0613027	1794.66	79.9226	27.1555	2.20933	1.08894e-162	2.72344e-159	Null_Model_OpenChrom	human
FANTOM5_enhancer_cell	dendritic_cell	Enhancer	1734	64679	0.0268093	516.494	44.8707	27.1337	3.35725	1.97233e-162	4.9328e-159	Null_Model_OpenChrom	human
Roadmapepigenomics_Histone_narrow	IMR90_Cell_Line	H3K79me2	12091	64679	0.186939	7778.11	158.996	27.1257	1.55449	2.44868e-162	6.12414e-159	Null_Model_OpenChrom	human
Roadmapepigenomics_Histone_narrow	Pancreas	H3K4me1	19238	64679	0.297438	13744	202.618	27.1151	1.39974	3.26732e-162	8.17158e-159	Null_Model_OpenChrom	human
Roadmapepigenomics_Histone_narrow	HSMMtube_Skeletal_Muscle_Myotubes_Derived_from_HSMM	H3K79me2	11326	64679	0.175111	7260.53	150.036	27.0965	1.55994	5.40926e-162	1.35286e-158	Null_Model_OpenChrom	human
SuperEnhancers_Hnisz2013	CD8_primary	SuperEnhancer	3827	64679	0.0591691	1703.01	78.3989	27.0921	2.24719	6.10647e-162	1.52723e-158	Null_Model_OpenChrom	human
Roadmapepigenomics_Histone_narrow	H9_Cell_Line	H3K4ac	9575	64679	0.148039	5701.39	143.008	27.0867	1.67941	7.0688e-162	1.76791e-158	Null_Model_OpenChrom	human
Roadmapepigenomics_ActiveChromatin	Dnd41_TCell_Leukemia	11_BivFlnk	1218	64679	0.0188315	317.794	33.2548	27.07	3.83267	1.11145e-161	2.77972e-158	Null_Model_OpenChrom	human
Enhancers_Hnisz2013	VACO_400	Enhancer	8177	64679	0.126424	4747.85	126.784	27.0473	1.72225	2.05558e-161	5.14101e-158	Null_Model_OpenChrom	human
SuperEnhancers_Hnisz2013	UCSD_Thymus	SuperEnhancer	2625	64679	0.040585	1039.35	58.7117	27.0073	2.52561	6.05959e-161	1.5155e-157	Null_Model_OpenChrom	human
SuperEnhancers_Hnisz2013	BI_CD8_Memory_7pool	SuperEnhancer	2830	64679	0.0437545	1136.56	62.7321	26.9948	2.48997	8.51516e-161	2.12964e-157	Null_Model_OpenChrom	human
SuperEnhancers_Hnisz2013	BI_CD4p_CD25-_Il17-_PMAstim_Th	SuperEnhancer	4793	64679	0.0741044	2342.31	90.7898	26.993	2.04627	8.92244e-161	2.2315e-157	Null_Model_OpenChrom	human
Roadmapepigenomics_Histone_narrow	Fetal_Intestine_Large	H3K4me1	18488	64679	0.285842	13249.8	194.279	26.9622	1.39534	2.05447e-160	5.13822e-157	Null_Model_OpenChrom	human
FANTOM5_enhancer_cell	monocyte	Enhancer	2187	64679	0.0338131	773.499	52.446	26.9516	2.82741	2.7329e-160	6.83497e-157	Null_Model_OpenChrom	human
Roadmapepigenomics_Histone_narrow	Placenta_Amnion	H3K4me1	17531	64679	0.271046	12347.3	192.409	26.9408	1.41982	3.65458e-160	9.14009e-157	Null_Model_OpenChrom	human
Roadmapepigenomics_Histone_narrow	HSMM_Skeletal_Muscle_Myoblasts	H3K79me2	9346	64679	0.144498	5730.08	134.298	26.9246	1.63104	5.65316e-160	1.41386e-156	Null_Model_OpenChrom	human
SuperEnhancers_Hnisz2013	GM12878	SuperEnhancer	1933	64679	0.0298861	661.05	47.2823	26.9012	2.92414	1.06414e-159	2.66141e-156	Null_Model_OpenChrom	human
SuperEnhancers_Hnisz2013	CD3	SuperEnhancer	2851	64679	0.0440792	1146.1	63.422	26.8818	2.48756	1.79291e-159	4.48406e-156	Null_Model_OpenChrom	human
FANTOM5_enhancer_organ	spleen_expressed_enhancers	Enhancer	1011	64679	0.015631	235.393	28.8655	26.8697	4.29495	2.47992e-159	6.20227e-156	Null_Model_OpenChrom	human
Roadmapepigenomics_Histone_narrow	Penis_Foreskin_Fibroblast_Primary_Cells_skin01	H3K4me1	26445	64679	0.408865	20559.1	219.464	26.8193	1.28629	9.63335e-159	2.4093e-155	Null_Model_OpenChrom	human
Roadmapepigenomics_Histone_narrow	H9_Derived_Neuron_Cultured_Cells	H3K4me1	18191	64679	0.28125	13129.7	188.796	26.8083	1.38548	1.29468e-158	3.238e-155	Null_Model_OpenChrom	human
Roadmapepigenomics_Histone_narrow	IMR90_Cell_Line	H2AK5ac	14719	64679	0.22757	10121.3	171.585	26.7956	1.45426	1.81821e-158	4.54735e-155	Null_Model_OpenChrom	human
Enhancers_Hnisz2013	BI_Brain_Inferior_Temporal_Lobe	Enhancer	14036	64679	0.21701	9564.14	167.225	26.7416	1.46757	7.73949e-158	1.93565e-154	Null_Model_OpenChrom	human
Roadmapepigenomics_Histone_narrow	H1_Derived_Mesenchymal_Stem_Cells	H3K4me1	22139	64679	0.34229	16397.8	214.859	26.7205	1.35012	1.35905e-157	3.39899e-154	Null_Model_OpenChrom	human
SuperEnhancers_Hnisz2013	Fetal_Thymus	SuperEnhancer	2695	64679	0.0416673	1097.03	59.987	26.6385	2.45663	1.21461e-156	3.03774e-153	Null_Model_OpenChrom	human
Roadmapepigenomics_Histone_narrow	NHDF-Ad_Adult_Dermal_Fibroblasts	H3K79me2	9627	64679	0.148843	6038.02	134.735	26.6374	1.5944	1.25097e-156	3.12868e-153	Null_Model_OpenChrom	human
SuperEnhancers_Hnisz2013	BI_CD4_Naive_Primary_8pool	SuperEnhancer	2218	64679	0.0342924	802.19	53.1619	26.632	2.76493	1.44507e-156	3.61412e-153	Null_Model_OpenChrom	human
Enhancers_Hnisz2013	HeLa	Enhancer	10561	64679	0.163283	6749.36	143.36	26.5879	1.56474	4.68024e-156	1.17053e-152	Null_Model_OpenChrom	human
Roadmapepigenomics_Histone_narrow	NHEK-Epidermal_Keratinocytes	H3K4me1	20261	64679	0.313255	15073.2	195.168	26.5811	1.34417	5.61073e-156	1.40324e-152	Null_Model_OpenChrom	human
Roadmapepigenomics_Histone_narrow	H1_BMP4_Derived_Mesendoderm_Cultured_Cells	H2BK15ac	4887	64679	0.0755578	2552.23	88.0917	26.5039	1.9148	4.3695e-155	1.09281e-151	Null_Model_OpenChrom	human
Roadmapepigenomics_Histone_narrow	Fetal_Stomach	H3K4me1	21650	64679	0.33473	16487.2	194.836	26.4983	1.31314	5.07065e-155	1.26817e-151	Null_Model_OpenChrom	human
Roadmapepigenomics_Histone_narrow	H9_Derived_Neuronal_Progenitor_Cultured_Cells	H3K4me1	17146	64679	0.265094	12451.1	177.27	26.4842	1.37706	7.36689e-155	1.84246e-151	Null_Model_OpenChrom	human
Roadmapepigenomics_Histone_narrow	HMEC_Mammary_Epithelial	H3K4me1	18636	64679	0.288131	13554.3	191.979	26.4699	1.37491	1.07559e-154	2.69006e-151	Null_Model_OpenChrom	human
Roadmapepigenomics_ActiveChromatin	CD3_Primary_Peripheral_UW	12_EnhBiv	5184	64679	0.0801497	2704.25	93.7005	26.4647	1.91698	1.2365e-154	3.09249e-151	Null_Model_OpenChrom	human
Roadmapepigenomics_Histone_narrow	H1_Derived_Neuronal_Progenitor_Cultured_Cells	H2BK15ac	7087	64679	0.109572	4067.29	114.161	26.4513	1.74244	1.7642e-154	4.41227e-151	Null_Model_OpenChrom	human
Roadmapepigenomics_ActiveChromatin	CD14_Primary	11_BivFlnk	1994	64679	0.0308292	718.53	48.2369	26.4418	2.77511	2.26762e-154	5.67132e-151	Null_Model_OpenChrom	human
Roadmapepigenomics_Histone_narrow	H1_Derived_Neuronal_Progenitor_Cultured_Cells	H4K8ac	10843	64679	0.167643	7061.53	143.09	26.4272	1.5355	3.33255e-154	8.3347e-151	Null_Model_OpenChrom	human
Roadmapepigenomics_Histone_narrow	H9_Cell_Line	H2BK20ac	6653	64679	0.102862	3691.17	112.117	26.4173	1.80241	4.33002e-154	1.08294e-150	Null_Model_OpenChrom	human
Roadmapepigenomics_Histone_narrow	Lung	H3K4me1	18585	64679	0.287342	13659.9	186.908	26.3504	1.36055	2.53743e-153	6.34612e-150	Null_Model_OpenChrom	human
Roadmapepigenomics_Histone_narrow	H1_BMP4_Derived_Mesendoderm_Cultured_Cells	H3K79me2	8639	64679	0.133567	5435.5	121.726	26.3173	1.58936	6.07741e-153	1.51996e-149	Null_Model_OpenChrom	human
Roadmapepigenomics_ActiveChromatin	CD15_Primary	7_Enh	9482	64679	0.146601	6048.68	131.278	26.1531	1.56761	4.54524e-151	1.13676e-147	Null_Model_OpenChrom	human
Enhancers_Hnisz2013	BI_Adipose_Nuclei	Enhancer	15249	64679	0.235764	10804.3	170.361	26.0899	1.41139	2.3706e-150	5.92888e-147	Null_Model_OpenChrom	human
SuperEnhancers_Hnisz2013	BI_CD4p_CD225int_CD127p_Tmem	SuperEnhancer	2029	64679	0.0313703	766.544	48.411	26.0779	2.64694	3.25091e-150	8.13054e-147	Null_Model_OpenChrom	human
Roadmapepigenomics_Histone_narrow	Osteoblasts	H3K4me1	22238	64679	0.343821	17066.3	198.459	26.0595	1.30304	5.24908e-150	1.31279e-146	Null_Model_OpenChrom	human
Enhancers_Hnisz2013	Colon_Crypt_1	Enhancer	10840	64679	0.167597	7338.97	134.352	26.0586	1.47705	5.38103e-150	1.34579e-146	Null_Model_OpenChrom	human
SuperEnhancers_Hnisz2013	BI_CD4_Memory_Primary_8pool	SuperEnhancer	1736	64679	0.0268402	606.102	43.4016	26.0335	2.8642	1.03333e-149	2.58435e-146	Null_Model_OpenChrom	human
FANTOM5_enhancer_cell	mast_cell	Enhancer	1300	64679	0.0200993	402.445	34.5733	25.961	3.23026	6.83715e-149	1.70997e-145	Null_Model_OpenChrom	human
Roadmapepigenomics_Histone_narrow	Colon_Smooth_Muscle	H3K4me1	16817	64679	0.260007	12423.1	169.356	25.9446	1.35368	1.04631e-148	2.61681e-145	Null_Model_OpenChrom	human
SuperEnhancers_Hnisz2013	BI_CD4p_CD25-_CD45ROp_Memory	SuperEnhancer	2659	64679	0.0411107	1132.96	58.8591	25.9271	2.34696	1.65007e-148	4.12684e-145	Null_Model_OpenChrom	human
Enhancers_Hnisz2013	UCSD_Gastric	Enhancer	14048	64679	0.217196	10011.8	155.859	25.8967	1.40315	3.62747e-148	9.07231e-145	Null_Model_OpenChrom	human
SuperEnhancers_Hnisz2013	BI_CD8_Naive_7pool	SuperEnhancer	1652	64679	0.0255415	581.076	41.4054	25.8643	2.843	8.39304e-148	2.0991e-144	Null_Model_OpenChrom	human
SuperEnhancers_Hnisz2013	UCSD_Spleen	SuperEnhancer	5540	64679	0.0856538	3147.45	92.587	25.8411	1.76015	1.53238e-147	3.83248e-144	Null_Model_OpenChrom	human
Enhancers_Hnisz2013	BI_Skeletal_Muscle	Enhancer	14024	64679	0.216825	9985.64	156.384	25.8233	1.40442	2.4286e-147	6.07392e-144	Null_Model_OpenChrom	human
Roadmapepigenomics_ActiveChromatin	CD3_Primary_Peripheral_UW	10_TssBiv	781	64679	0.012075	183.698	23.1447	25.8073	4.25154	3.6683e-147	9.17441e-144	Null_Model_OpenChrom	human
SuperEnhancers_Hnisz2013	BI_CD4p_CD25-_CD45RAp_Naive	SuperEnhancer	2726	64679	0.0421466	1216.13	58.6261	25.7542	2.24153	1.44706e-146	3.6191e-143	Null_Model_OpenChrom	human
Enhancers_Hnisz2013	CD34_adult	Enhancer	1514	64679	0.0234079	501.824	39.342	25.7276	3.01699	2.86765e-146	7.172e-143	Null_Model_OpenChrom	human
Roadmapepigenomics_ActiveChromatin	Dnd41_TCell_Leukemia	3_TxFlnk	2174	64679	0.0336121	868.675	50.9139	25.6379	2.50266	2.88577e-145	7.21732e-142	Null_Model_OpenChrom	human
Roadmapepigenomics_ActiveChromatin	Adult_Liver	7_Enh	12730	64679	0.196818	8868.48	150.674	25.6283	1.43542	3.69408e-145	9.2389e-142	Null_Model_OpenChrom	human
Roadmapepigenomics_Histone_narrow	Penis_Foreskin_Keratinocyte_Primary_Cells_skin03	H3K4me1	22887	64679	0.353855	17966.7	192.375	25.5768	1.27386	1.38387e-144	3.46106e-141	Null_Model_OpenChrom	human
SuperEnhancers_Hnisz2013	BI_CD4_Naive_Primary_7pool	SuperEnhancer	1780	64679	0.0275205	658.917	43.8977	25.5386	2.7014	3.67871e-144	9.20046e-141	Null_Model_OpenChrom	human
SuperEnhancers_Hnisz2013	BI_CD8_Naive_8pool	SuperEnhancer	1721	64679	0.0266083	664.374	41.3754	25.5376	2.59041	3.77391e-144	9.43855e-141	Null_Model_OpenChrom	human
FANTOM5_enhancer_cell	basophil	Enhancer	1349	64679	0.0208568	448.892	35.3302	25.477	3.00518	1.774e-143	4.43678e-140	Null_Model_OpenChrom	human
Roadmapepigenomics_Histone_narrow	H1_Derived_Neuronal_Progenitor_Cultured_Cells	H3K79me1	9191	64679	0.142102	6038.68	123.831	25.4566	1.52202	2.98248e-143	7.45918e-140	Null_Model_OpenChrom	human
Enhancers_Hnisz2013	Colon_Crypt_3	Enhancer	10705	64679	0.16551	7147.55	140.016	25.4075	1.49772	1.04306e-142	2.60869e-139	Null_Model_OpenChrom	human
Roadmapepigenomics_ActiveChromatin	CD15_Primary	10_TssBiv	853	64679	0.0131882	222.518	24.8263	25.3957	3.83339	1.40686e-142	3.51855e-139	Null_Model_OpenChrom	human
SuperEnhancers_Hnisz2013	BI_CD34_Primary_RO01536	SuperEnhancer	2989	64679	0.0462128	1450.98	60.669	25.351	2.05999	4.37805e-142	1.09495e-138	Null_Model_OpenChrom	human
Roadmapepigenomics_Histone_narrow	Sigmoid_Colon	H3K4me1	9895	64679	0.152986	6572.82	131.282	25.3058	1.50544	1.37948e-141	3.45009e-138	Null_Model_OpenChrom	human
Roadmapepigenomics_Histone_narrow	Right_Ventricle	H3K4me1	19205	64679	0.296928	14651.7	179.947	25.3034	1.31077	1.46423e-141	3.66205e-138	Null_Model_OpenChrom	human
eQTLs_GTEx_Analysis_V6	Cells_Transformed_fibroblasts	none	7790	64679	0.120441	5034.1	109.184	25.241	1.54745	7.11186e-141	1.77868e-137	Null_Model_OpenChrom	human
eQTLs_GTEx_Analysis_V6	Adipose_Subcutaneous	none	7236	64679	0.111876	4634.5	103.152	25.2202	1.56133	1.20284e-140	3.00831e-137	Null_Model_OpenChrom	human
Roadmapepigenomics_Histone_narrow	Esophagus	H3K4me1	16417	64679	0.253823	12328.2	162.469	25.1667	1.33166	4.64441e-140	1.16157e-136	Null_Model_OpenChrom	human
Roadmapepigenomics_Histone_narrow	Rectal_Smooth_Muscle	H3K4me1	12660	64679	0.195736	8917.34	148.862	25.1419	1.41971	8.66044e-140	2.16598e-136	Null_Model_OpenChrom	human
Enhancers_Hnisz2013	Fetal_Intestine_Large	Enhancer	13515	64679	0.208955	9776.01	148.775	25.1319	1.38247	1.11491e-139	2.78839e-136	Null_Model_OpenChrom	human
Roadmapepigenomics_Histone_narrow	H9_Cell_Line	H4K91ac	5528	64679	0.0854682	3244.45	90.9376	25.1112	1.70383	1.87754e-139	4.69574e-136	Null_Model_OpenChrom	human
eQTLs_GTEx_Analysis_V6	Nerve_Tibial	none	8059	64679	0.1246	5269.09	111.4	25.0441	1.52949	1.01304e-138	2.53361e-135	Null_Model_OpenChrom	human
Enhancers_Hnisz2013	Fetal_Intestine	Enhancer	13171	64679	0.203636	9322.98	153.671	25.0406	1.41275	1.10401e-138	2.76114e-135	Null_Model_OpenChrom	human
Roadmapepigenomics_Histone_narrow	H1_Derived_Neuronal_Progenitor_Cultured_Cells	H3K4ac	3796	64679	0.0586898	1994.23	72.0022	25.0238	1.90349	1.68599e-138	4.21667e-135	Null_Model_OpenChrom	human
Roadmapepigenomics_ActiveChromatin	Fetal_Adrenal_Gland	11_BivFlnk	3136	64679	0.0484856	1557.69	63.1107	25.0085	2.01323	2.47004e-138	6.17758e-135	Null_Model_OpenChrom	human
Enhancers_Hnisz2013	UCSD_Psoas_Muscle	Enhancer	9654	64679	0.14926	6528.24	125.074	24.9914	1.47881	3.79136e-138	9.4822e-135	Null_Model_OpenChrom	human
eQTLs_GTEx_Analysis_V6	Whole_Blood	none	6640	64679	0.102661	4107.42	101.489	24.9542	1.61659	9.61866e-138	2.40563e-134	Null_Model_OpenChrom	human
eQTLs_GTEx_Analysis_V6	Skin_Sun_Exposed_Lower_leg	none	7420	64679	0.11472	4785.16	105.591	24.9532	1.55063	9.86525e-138	2.4673e-134	Null_Model_OpenChrom	human
Enhancers_Hnisz2013	UCSD_Lung	Enhancer	15891	64679	0.24569	11868.6	161.43	24.917	1.33891	2.43704e-137	6.09504e-134	Null_Model_OpenChrom	human
Enhancers_Hnisz2013	VACO_503	Enhancer	3557	64679	0.0549947	1825.48	69.5045	24.9123	1.94852	2.73901e-137	6.85026e-134	Null_Model_OpenChrom	human
eQTLs_GTEx_Analysis_V6	Thyroid	none	8225	64679	0.127166	5381.98	114.141	24.9079	1.52825	3.05249e-137	7.63428e-134	Null_Model_OpenChrom	human
Roadmapepigenomics_Histone_narrow	Penis_Foreskin_Keratinocyte_Primary_Cells_skin02	H3K27me3	8562	64679	0.132377	5702.35	114.897	24.8888	1.50149	4.91755e-137	1.22988e-133	Null_Model_OpenChrom	human
eQTLs_GTEx_Analysis_V6	Muscle_Skeletal	none	6681	64679	0.103295	4254.75	97.6784	24.8392	1.57025	1.69241e-136	4.23273e-133	Null_Model_OpenChrom	human
eQTLs_GTEx_Analysis_V6	Artery_Tibial	none	7116	64679	0.11002	4545.96	103.47	24.8386	1.56535	1.71769e-136	4.29594e-133	Null_Model_OpenChrom	human
FANTOM5_enhancer_cell	neutrophil	Enhancer	857	64679	0.0132501	244.144	24.6753	24.8368	3.51023	1.79526e-136	4.48995e-133	Null_Model_OpenChrom	human
eQTLs	MRCA	none	6413	64679	0.0991512	3998.76	97.3268	24.8055	1.60375	3.91293e-136	9.78624e-133	Null_Model_OpenChrom	human
eQTLs	MRCE	none	7412	64679	0.114597	4762.07	106.833	24.8045	1.55647	4.01274e-136	1.00359e-132	Null_Model_OpenChrom	human
eQTLs_GTEx_Analysis_V6	Esophagus_Muscularis	none	6156	64679	0.0951777	3791.87	95.4393	24.7711	1.62347	9.19331e-136	2.29925e-132	Null_Model_OpenChrom	human
Roadmapepigenomics_Histone_narrow	H1_Cell_Line	H3K4ac	2728	64679	0.0421775	1310	57.5474	24.6406	2.08245	2.31807e-134	5.79749e-131	Null_Model_OpenChrom	human
Roadmapepigenomics_Histone_narrow	Fetal_Heart	H3K4me1	18196	64679	0.281328	14236.5	160.84	24.6174	1.27812	4.11778e-134	1.02986e-130	Null_Model_OpenChrom	human
Roadmapepigenomics_ActiveChromatin	Fetal_Brain_Female	10_TssBiv	2687	64679	0.0415436	1284.92	57.0492	24.5767	2.09118	1.12231e-133	2.80691e-130	Null_Model_OpenChrom	human
Enhancers_Hnisz2013	UCSD_Bladder	Enhancer	4335	64679	0.0670233	2549.89	73.3259	24.3449	1.70008	3.28176e-131	8.20768e-128	Null_Model_OpenChrom	human
Enhancers_Hnisz2013	UCSD_Esophagus	Enhancer	14213	64679	0.219747	10610.6	148.01	24.3391	1.33951	3.78034e-131	9.45464e-128	Null_Model_OpenChrom	human
SuperEnhancers_Hnisz2013	CD14	SuperEnhancer	5444	64679	0.0841695	3277.96	89.0342	24.3282	1.66079	4.93631e-131	1.23457e-127	Null_Model_OpenChrom	human
Roadmapepigenomics_ActiveChromatin	CD4+_CD25+_CD127-_Treg_Primary	11_BivFlnk	2136	64679	0.0330246	950.578	48.7786	24.3021	2.24705	9.31273e-131	2.32911e-127	Null_Model_OpenChrom	human
eQTLs_GTEx_Analysis_V6	Esophagus_Mucosa	none	6466	64679	0.0999706	4136.37	95.9253	24.2859	1.56321	1.38075e-130	3.45326e-127	Null_Model_OpenChrom	human
Enhancers_Hnisz2013	UCSD_Adrenal_Gland	Enhancer	8178	64679	0.12644	5512.25	109.858	24.2654	1.4836	2.27546e-130	5.69093e-127	Null_Model_OpenChrom	human
Roadmapepigenomics_Histone_narrow	iPS_DF_19.11_Cell_Line	H3K36me3	16625	64679	0.257039	12770.9	158.998	24.24	1.30179	4.21691e-130	1.05465e-126	Null_Model_OpenChrom	human
eQTLs_GTEx_Analysis_V6	Artery_Aorta	none	5348	64679	0.0826853	3292.61	84.8829	24.2145	1.62425	7.83503e-130	1.95954e-126	Null_Model_OpenChrom	human
Roadmapepigenomics_ActiveChromatin	CD14_Primary	10_TssBiv	602	64679	0.0093075	148.334	18.7478	24.1984	4.05842	1.15753e-129	2.89497e-126	Null_Model_OpenChrom	human
Roadmapepigenomics_ActiveChromatin	Duodenum_Mucosa	7_Enh	10318	64679	0.159526	7285.64	125.328	24.1954	1.41621	1.24412e-129	3.11155e-126	Null_Model_OpenChrom	human
Roadmapepigenomics_ActiveChromatin	ES-I3	10_TssBiv	3960	64679	0.0612254	2210.54	72.3202	24.1905	1.79142	1.40013e-129	3.50172e-126	Null_Model_OpenChrom	human
SuperEnhancers_Hnisz2013	BI_CD34_Primary_RO01480	SuperEnhancer	1368	64679	0.0211506	532.995	34.6523	24.0967	2.56663	1.35356e-128	3.38524e-125	Null_Model_OpenChrom	human
Roadmapepigenomics_Histone_narrow	Muscle_Satellite_Cultured_Cells	H3K4me1	21167	64679	0.327262	16980.7	173.875	24.0763	1.24653	2.21424e-128	5.53782e-125	Null_Model_OpenChrom	human
Roadmapepigenomics_Histone_narrow	Neurosphere_Cultured_Cells_Ganglionic_Eminence_Derived	H3K4me1	14171	64679	0.219097	10688.6	144.681	24.0695	1.3258	2.60993e-128	6.52744e-125	Null_Model_OpenChrom	human
Roadmapepigenomics_ActiveChromatin	CD56_Primary	11_BivFlnk	1329	64679	0.0205476	499.234	34.5284	24.0314	2.66208	6.52547e-128	1.63202e-124	Null_Model_OpenChrom	human
Enhancers_Hnisz2013	BI_Stomach_Smooth_Muscle	Enhancer	9533	64679	0.147389	6712.78	117.449	24.0122	1.42013	1.03627e-127	2.5917e-124	Null_Model_OpenChrom	human
eQTLs_GTEx_Analysis_V6	Lung	none	6135	64679	0.094853	3871.78	94.9689	23.8312	1.58454	7.93514e-126	1.98458e-122	Null_Model_OpenChrom	human
Roadmapepigenomics_ActiveChromatin	A549_EtOH_0.02pct_Lung_Carcinoma	2_TssAFlnk	6178	64679	0.0955179	3994.94	91.6367	23.823	1.54646	9.65201e-126	2.41397e-122	Null_Model_OpenChrom	human
Roadmapepigenomics_Histone_narrow	iPS_DF_19.11_Cell_Line	H3K4me1	19101	64679	0.29532	15317.7	159.845	23.6686	1.24699	3.79862e-124	9.50035e-121	Null_Model_OpenChrom	human
Enhancers_Hnisz2013	H2171	Enhancer	10180	64679	0.157393	7360.2	119.332	23.6299	1.38311	9.50821e-124	2.378e-120	Null_Model_OpenChrom	human
Roadmapepigenomics_Histone_narrow	Fetal_Brain_Female	H3K4me1	12316	64679	0.190417	9173.62	133.11	23.6074	1.34255	1.61719e-123	4.04459e-120	Null_Model_OpenChrom	human
eQTLs_GTEx_Analysis_V6	Skin_Not_Sun_Exposed_Suprapubic	none	4517	64679	0.0698372	2758.65	74.9644	23.4558	1.6374	5.76472e-122	1.44176e-118	Null_Model_OpenChrom	human
EBV_Enhancers	LCLs	none	355	64679	0.00548864	71.007	12.1275	23.4172	4.99951	1.42686e-121	3.56857e-118	Null_Model_OpenChrom	human
Enhancers_Hnisz2013	HepG2	Enhancer	3485	64679	0.0538815	1969.69	64.7157	23.4149	1.76932	1.50532e-121	3.76481e-118	Null_Model_OpenChrom	human
Enhancers_Hnisz2013	VACO_9M	Enhancer	7029	64679	0.108675	4785.31	95.8925	23.398	1.46887	2.24016e-121	5.60265e-118	Null_Model_OpenChrom	human
Enhancers_Hnisz2013	BI_Brain_Angular_Gyrus	Enhancer	6497	64679	0.10045	4267.34	95.3214	23.3909	1.52249	2.64207e-121	6.60782e-118	Null_Model_OpenChrom	human
SuperEnhancers_Hnisz2013	UCSD_Sigmoid_Colon	SuperEnhancer	4604	64679	0.0711823	2789.72	77.6184	23.3743	1.65034	3.89893e-121	9.75123e-118	Null_Model_OpenChrom	human
Roadmapepigenomics_Histone_narrow	H1_Cell_Line	H2BK12ac	7911	64679	0.122312	5485.08	103.884	23.3523	1.44228	6.52588e-121	1.63212e-117	Null_Model_OpenChrom	human
EBV_Enhancers	LCLs	SuperEnhancers	355	64679	0.00548864	71.022	12.1639	23.3459	4.99845	7.587e-121	1.89751e-117	Null_Model_OpenChrom	human
eQTLs_GTEx_Analysis_V6	Breast_Mammary_Tissue	none	3581	64679	0.0553657	2079.3	64.3984	23.3189	1.72222	1.42489e-120	3.56365e-117	Null_Model_OpenChrom	human
Enhancers_Hnisz2013	HUVEC	Enhancer	10404	64679	0.160856	7587.08	120.965	23.287	1.37128	2.99989e-120	7.50274e-117	Null_Model_OpenChrom	human
Enhancers_Hnisz2013	UCSD_Pancreas	Enhancer	5843	64679	0.0903384	3803.97	87.9198	23.192	1.53603	2.74313e-119	6.86057e-116	Null_Model_OpenChrom	human
eQTLs_GTEx_Analysis_V6	Cells_EBV-transformed_lymphocytes	none	2587	64679	0.0399975	1326.92	54.6824	23.0436	1.94963	8.51834e-118	2.13044e-114	Null_Model_OpenChrom	human
eQTLs_GTEx_Analysis_V6	Colon_Transverse	none	3713	64679	0.0574066	2172.79	66.9062	23.0205	1.70887	1.45302e-117	3.634e-114	Null_Model_OpenChrom	human
FANTOM5_enhancer_organ	large_intestine_expressed_enhancers	Enhancer	487	64679	0.00752949	121.396	15.8943	23.0022	4.01168	2.21505e-117	5.53984e-114	Null_Model_OpenChrom	human
Roadmapepigenomics_ActiveChromatin	Brain_Germinal_Matrix	11_BivFlnk	2436	64679	0.0376629	1237.25	52.1289	22.9959	1.96888	2.56044e-117	6.40367e-114	Null_Model_OpenChrom	human
Roadmapepigenomics_ActiveChromatin	Dnd41_TCell_Leukemia	10_TssBiv	327	64679	0.00505574	64.2348	11.4328	22.9835	5.0907	3.40443e-117	8.51448e-114	Null_Model_OpenChrom	human
Roadmapepigenomics_Histone_narrow	H1_Derived_Neuronal_Progenitor_Cultured_Cells	H4K91ac	8314	64679	0.128542	5931.12	103.839	22.9477	1.40176	7.76196e-117	1.94127e-113	Null_Model_OpenChrom	human
Roadmapepigenomics_ActiveChromatin	CD19_Primary_Peripheral_UW	11_BivFlnk	1403	64679	0.0216917	580.113	35.9564	22.8857	2.41849	3.22773e-116	8.07255e-113	Null_Model_OpenChrom	human
eQTLs	monocytes	none	4269	64679	0.0660029	2613.81	72.3266	22.8849	1.63325	3.28277e-116	8.2102e-113	Null_Model_OpenChrom	human
Roadmapepigenomics_ActiveChromatin	Fetal_Adrenal_Gland	10_TssBiv	1320	64679	0.0204085	554.196	33.5048	22.8565	2.38183	6.29198e-116	1.57362e-112	Null_Model_OpenChrom	human
eQTLs_GTEx_Analysis_V6	Heart_Left_Ventricle	none	3912	64679	0.0604833	2385.08	66.8453	22.8425	1.64019	8.67238e-116	2.16896e-112	Null_Model_OpenChrom	human
Enhancers_Hnisz2013	UCSD_Right_Ventricle	Enhancer	3196	64679	0.0494133	1829.98	60.1512	22.7097	1.74646	1.7958e-114	4.4913e-111	Null_Model_OpenChrom	human
SuperEnhancers_Hnisz2013	DND41	SuperEnhancer	2209	64679	0.0341533	1115.35	48.241	22.6705	1.98054	4.38356e-114	1.09633e-110	Null_Model_OpenChrom	human
Roadmapepigenomics_Histone_narrow	Fetal_Lung	H3K4me1	19827	64679	0.306545	16210.6	159.698	22.6455	1.22309	7.73217e-114	1.93382e-110	Null_Model_OpenChrom	human
Roadmapepigenomics_Histone_narrow	H9_Cell_Line	H3K23ac	3645	64679	0.0563552	2189.93	64.2973	22.6303	1.66443	1.09125e-113	2.72922e-110	Null_Model_OpenChrom	human
eQTLs_GTEx_Analysis_V6	Testis	none	6199	64679	0.0958425	4153.11	90.6699	22.5642	1.49262	4.87559e-113	1.21939e-109	Null_Model_OpenChrom	human
eQTLs_GTEx_Analysis_V6	Adipose_Visceral_Omentum	none	3702	64679	0.0572365	2202.72	66.5341	22.534	1.68065	9.63891e-113	2.41069e-109	Null_Model_OpenChrom	human
FANTOM5_enhancer_organ	blood_vessel_expressed_enhancers	Enhancer	421	64679	0.00650907	102.39	14.2016	22.4349	4.11175	8.98547e-112	2.24727e-108	Null_Model_OpenChrom	human
Roadmapepigenomics_Histone_narrow	Small_Intestine	H3K4me1	11901	64679	0.184001	9113.14	124.477	22.3967	1.30592	2.11999e-111	5.30208e-108	Null_Model_OpenChrom	human
FANTOM5_enhancer_cell	macrophage	Enhancer	680	64679	0.0105135	213.33	20.8368	22.3964	3.18755	2.13234e-111	5.33298e-108	Null_Model_OpenChrom	human
SuperEnhancers_Hnisz2013	UCSD_Small_Intestine	SuperEnhancer	4257	64679	0.0658173	2682.69	70.3176	22.3885	1.58684	2.54556e-111	6.36644e-108	Null_Model_OpenChrom	human
Roadmapepigenomics_Histone_narrow	CD4+_CD25+_CD127-_Treg_Primary_CellsTh	H3K36me3	10464	64679	0.161784	7917.74	113.902	22.3548	1.32159	5.41579e-111	1.35449e-107	Null_Model_OpenChrom	human
FANTOM5_enhancer_organ	brain_expressed_enhancers	Enhancer	968	64679	0.0149662	368.337	26.9666	22.2373	2.62803	7.49136e-110	1.87359e-106	Null_Model_OpenChrom	human
Roadmapepigenomics_ActiveChromatin	Breast_vHMEC	10_TssBiv	749	64679	0.0115803	256.381	22.1573	22.2328	2.92144	8.2697e-110	2.06825e-106	Null_Model_OpenChrom	human
Roadmapepigenomics_Histone_narrow	IMR90_Cell_Line	H2BK15ac	9848	64679	0.15226	7281.4	115.444	22.2323	1.35249	8.35809e-110	2.09036e-106	Null_Model_OpenChrom	human
eQTLs	CD4+T-cells	none	3413	64679	0.0527683	1980.18	64.4653	22.2263	1.72358	9.57281e-110	2.39416e-106	Null_Model_OpenChrom	human
Enhancers_Hnisz2013	UCSD_Left_Ventricle	Enhancer	13884	64679	0.21466	10895.4	134.655	22.1944	1.2743	1.94425e-109	4.86257e-106	Null_Model_OpenChrom	human
FANTOM5_enhancer_cell	granulocyte	Enhancer	921	64679	0.0142396	347.659	25.8548	22.1754	2.64914	2.96931e-109	7.42625e-106	Null_Model_OpenChrom	human
eQTLs_GTEx_Analysis_V6	Pancreas	none	3516	64679	0.0543608	2120.64	63.0062	22.1464	1.65799	5.64797e-109	1.41256e-105	Null_Model_OpenChrom	human
Roadmapepigenomics_Histone_narrow	Fetal_Intestine_Large	H3K9me3	6650	64679	0.102815	4570.55	93.9363	22.1368	1.45497	6.98959e-109	1.7481e-105	Null_Model_OpenChrom	human
Roadmapepigenomics_ActiveChromatin	Fetal_Muscle_Leg	11_BivFlnk	1636	64679	0.0252941	780.703	38.7122	22.0937	2.09555	1.81543e-108	4.54039e-105	Null_Model_OpenChrom	human
Roadmapepigenomics_ActiveChromatin	Fetal_Intestine_Large	11_BivFlnk	1522	64679	0.0235316	716.117	36.6126	22.0111	2.12535	1.12778e-107	2.82057e-104	Null_Model_OpenChrom	human
Roadmapepigenomics_ActiveChromatin	Adipose_Derived_Mesenchymal_Stem_Cell	2_TssAFlnk	6149	64679	0.0950695	4220.67	87.8046	21.9616	1.45688	3.35575e-107	8.39274e-104	Null_Model_OpenChrom	human
eQTLs_GTEx_Analysis_V6	Heart_Atrial_Appendage	none	3330	64679	0.051485	1992.26	60.9742	21.9394	1.67147	5.46151e-107	1.36592e-103	Null_Model_OpenChrom	human
Roadmapepigenomics_Histone_narrow	Penis_Foreskin_Melanocyte_Primary_Cells_skin01	H3K4me1	8346	64679	0.129037	6068.29	103.889	21.9245	1.37535	7.5927e-107	1.89893e-103	Null_Model_OpenChrom	human
Roadmapepigenomics_Histone_narrow	H1_BMP4_Derived_Trophoblast_Cultured_Cells	H3K4me1	17145	64679	0.265078	13994.8	143.704	21.9213	1.2251	8.14144e-107	2.03617e-103	Null_Model_OpenChrom	human
eQTLs_GTEx_Analysis_V6	Adrenal_Gland	none	2624	64679	0.0405696	1502.98	51.1805	21.9032	1.74586	1.20973e-106	3.02552e-103	Null_Model_OpenChrom	human
eQTLs_GTEx_Analysis_V6	Stomach	none	2983	64679	0.0461201	1747.89	56.5916	21.825	1.70663	6.71225e-106	1.67873e-102	Null_Model_OpenChrom	human
SuperEnhancers_Hnisz2013	K562	SuperEnhancer	2068	64679	0.0319733	1082.73	45.1518	21.8212	1.90998	7.3017e-106	1.82616e-102	Null_Model_OpenChrom	human
eQTLs_GTEx_Analysis_V6	Colon_Sigmoid	none	2492	64679	0.0385287	1418.14	49.3136	21.7761	1.75723	1.95539e-105	4.89044e-102	Null_Model_OpenChrom	human
Enhancers_Hnisz2013	Fetal_muscle	Enhancer	12706	64679	0.196447	9963.58	126.178	21.7345	1.27525	4.83917e-105	1.21028e-101	Null_Model_OpenChrom	human
FANTOM5_enhancer_cell	blood_vessel_endothelial_cell	Enhancer	904	64679	0.0139767	353.817	25.4594	21.6102	2.55499	7.2019e-104	1.8012e-100	Null_Model_OpenChrom	human
FANTOM5_enhancer_organ	lung_expressed_enhancers	Enhancer	681	64679	0.0105289	224.438	21.1314	21.6059	3.03425	7.90894e-104	1.97803e-100	Null_Model_OpenChrom	human
Roadmapepigenomics_Histone_narrow	IMR90_Cell_Line	H2BK12ac	11843	64679	0.183104	9253.43	120.069	21.5674	1.27985	1.81811e-103	4.54708e-100	Null_Model_OpenChrom	human
Roadmapepigenomics_ActiveChromatin	Fetal_Brain_Male	7_Enh	10789	64679	0.166808	8292.59	116.248	21.4748	1.30104	1.33992e-102	3.35115e-99	Null_Model_OpenChrom	human
Roadmapepigenomics_ActiveChromatin	Fetal_Intestine_Small	11_BivFlnk	1652	64679	0.0255415	809.696	39.3637	21.398	2.04027	6.9748e-102	1.7444e-98	Null_Model_OpenChrom	human
eQTLs_GTEx_Analysis_V6	Brain_Cerebellum	none	3231	64679	0.0499544	1922.26	61.1778	21.3923	1.68083	7.87849e-102	1.97041e-98	Null_Model_OpenChrom	human
FANTOM5_enhancer_cell	melanocyte	Enhancer	468	64679	0.00723573	128.056	15.8977	21.3832	3.65465	9.57216e-102	2.394e-98	Null_Model_OpenChrom	human
Enhancers_Hnisz2013	HMEC	Enhancer	9733	64679	0.150482	7299.14	113.864	21.3751	1.33344	1.13933e-101	2.84948e-98	Null_Model_OpenChrom	human
Enhancers_Hnisz2013	NHLF	Enhancer	7722	64679	0.11939	5708.79	95.256	21.1348	1.35265	1.90508e-99	4.76462e-96	Null_Model_OpenChrom	human
eQTLs_GTEx_Analysis_V6	Esophagus_Gastroesophageal_Junction	none	2456	64679	0.0379721	1379.67	51.1075	21.0601	1.78013	9.24607e-99	2.31244e-95	Null_Model_OpenChrom	human
eQTLs_GTEx_Analysis_V6	Brain_Cerebellar_Hemisphere	none	2495	64679	0.0385751	1459.38	49.5503	20.9003	1.70963	2.65865e-97	6.64929e-94	Null_Model_OpenChrom	human
SuperEnhancers_Hnisz2013	BI_CD34_Primary_RO01549	SuperEnhancer	1090	64679	0.0168525	475.325	29.4837	20.848	2.29317	7.95302e-97	1.98905e-93	Null_Model_OpenChrom	human
FANTOM5_enhancer_cell	kidney_epithelial_cell	Enhancer	933	64679	0.0144251	392.854	26.0216	20.7576	2.37493	5.23544e-96	1.30938e-92	Null_Model_OpenChrom	human
FANTOM5_enhancer_organ	meninx_expressed_enhancers	Enhancer	481	64679	0.00743673	143.031	16.3499	20.6711	3.36291	3.15566e-95	7.89231e-92	Null_Model_OpenChrom	human
Roadmapepigenomics_ActiveChromatin	CD4+_CD25+_CD127-_Treg_Primary	10_TssBiv	875	64679	0.0135283	366.46	24.6488	20.6314	2.38771	7.16778e-95	1.79266e-91	Null_Model_OpenChrom	human
Enhancers_Hnisz2013	H1	Enhancer	2511	64679	0.0388225	1485.51	49.7952	20.5942	1.69033	1.54641e-94	3.86758e-91	Null_Model_OpenChrom	human
BroadChromHMM	HMEC	StrongEnhancer	8297	64679	0.12828	6236.63	100.223	20.5578	1.33037	3.27599e-94	8.19325e-91	Null_Model_OpenChrom	human
BroadChromHMM	H1-hESC	WeakEnhancer	12652	64679	0.195612	10185	120.272	20.5123	1.24222	8.35888e-94	2.09056e-90	Null_Model_OpenChrom	human
Roadmapepigenomics_Histone_narrow	Gastric	H3K4me1	12988	64679	0.200807	10586.8	117.187	20.4907	1.22682	1.30413e-93	3.26163e-90	Null_Model_OpenChrom	human
SuperEnhancers_Hnisz2013	Jurkat	SuperEnhancer	1826	64679	0.0282317	979.677	41.5912	20.3486	1.86388	2.38831e-92	5.97317e-89	Null_Model_OpenChrom	human
FANTOM5_enhancer_cell	vascular_associated_smooth_muscle_cell	Enhancer	1130	64679	0.0174709	529.284	29.5447	20.3325	2.13496	3.31832e-92	8.29912e-89	Null_Model_OpenChrom	human
Enhancers_Hnisz2013	BI_Brain_Mid_Frontal_Lobe	Enhancer	2938	64679	0.0454243	1829.5	54.5663	20.3147	1.6059	4.76848e-92	1.1926e-88	Null_Model_OpenChrom	human
BroadChromHMM	GM12878	PoisedPromoter	1612	64679	0.0249231	847.875	37.618	20.3128	1.90122	4.95818e-92	1.24004e-88	Null_Model_OpenChrom	human
Roadmapepigenomics_Histone_narrow	IMR90_Cell_Line	H3K4me1	19107	64679	0.295413	16138	146.765	20.2297	1.18398	2.68387e-91	6.71236e-88	Null_Model_OpenChrom	human
FANTOM5_enhancer_cell	respiratory_epithelial_cell	Enhancer	817	64679	0.0126316	341.519	23.5481	20.1919	2.39225	5.76648e-91	1.4422e-87	Null_Model_OpenChrom	human
Roadmapepigenomics_Histone_narrow	A549_EtOH_0.02pct_Lung_Carcinoma	H3K4me1	16378	64679	0.25322	13625.9	136.301	20.1912	1.20197	5.85368e-91	1.46401e-87	Null_Model_OpenChrom	human
Enhancers_Hnisz2013	UCSD_Adipose_Tissue	Enhancer	441	64679	0.00681829	134.938	15.2147	20.1162	3.26817	2.66428e-90	6.66335e-87	Null_Model_OpenChrom	human
Enhancers_Hnisz2013	u87	Enhancer	11317	64679	0.174972	9062.34	112.089	20.115	1.2488	2.72603e-90	6.8178e-87	Null_Model_OpenChrom	human
Roadmapepigenomics_Histone_narrow	H1_Derived_Neuronal_Progenitor_Cultured_Cells	H2AK5ac	6530	64679	0.10096	4778.79	87.119	20.1014	1.36646	3.58925e-90	8.9767e-87	Null_Model_OpenChrom	human
BroadChromHMM	HUVEC	PoisedPromoter	1844	64679	0.02851	996.05	42.2666	20.062	1.85131	7.93459e-90	1.98444e-86	Null_Model_OpenChrom	human
Roadmapepigenomics_Histone_narrow	Monocytes-CD14+_RO01746	H4K20me1	10747	64679	0.166159	8529.05	111.026	19.9768	1.26005	4.38116e-89	1.09573e-85	Null_Model_OpenChrom	human
Roadmapepigenomics_ActiveChromatin	Fetal_Intestine_Large	10_TssBiv	1690	64679	0.026129	918.565	38.6748	19.9467	1.83983	8.0079e-89	2.00278e-85	Null_Model_OpenChrom	human
Enhancers_Hnisz2013	NHDF-Ad	Enhancer	7221	64679	0.111644	5440.74	89.6121	19.8663	1.32721	3.98063e-88	9.95557e-85	Null_Model_OpenChrom	human
BroadChromHMM	K562	WeakEnhancer	9530	64679	0.147343	7488.95	102.856	19.8438	1.27254	6.23025e-88	1.55819e-84	Null_Model_OpenChrom	human
eQTLs_GTEx_Analysis_V6	Artery_Coronary	none	1867	64679	0.0288656	1065.2	40.4078	19.8428	1.75273	6.36086e-88	1.59085e-84	Null_Model_OpenChrom	human
eQTLs_GTEx_Analysis_V6	Spleen	none	1985	64679	0.03069	1142.33	42.4875	19.8333	1.73767	7.68212e-88	1.9213e-84	Null_Model_OpenChrom	human
FANTOM5_enhancer_cell	astrocyte	Enhancer	618	64679	0.00955488	238.998	19.1151	19.8274	2.5858	8.63876e-88	2.16055e-84	Null_Model_OpenChrom	human
eQTLs_GTEx_Analysis_V6	Brain_Nucleus_accumbens_basal_ganglia	none	1610	64679	0.0248922	885.079	36.6065	19.803	1.81905	1.40107e-87	3.50407e-84	Null_Model_OpenChrom	human
FANTOM5_enhancer_cell	pericyte_cell	Enhancer	408	64679	0.00630808	125.435	14.281	19.7862	3.25269	1.95896e-87	4.89937e-84	Null_Model_OpenChrom	human
Enhancers_Hnisz2013	LnCAP	Enhancer	6033	64679	0.093276	4405.79	82.3048	19.7706	1.36933	2.66935e-87	6.67604e-84	Null_Model_OpenChrom	human
Enhancers_Hnisz2013	UCSD_Right_Atrium	Enhancer	10818	64679	0.167257	8597.46	112.391	19.7573	1.25828	3.47358e-87	8.68742e-84	Null_Model_OpenChrom	human
Roadmapepigenomics_Histone_narrow	Penis_Foreskin_Melanocyte_Primary_Cells_skin03	H3K27me3	10315	64679	0.15948	8195.04	107.458	19.7284	1.25869	6.15259e-87	1.53876e-83	Null_Model_OpenChrom	human
eQTLs_GTEx_Analysis_V6	Brain_Cortex	none	1969	64679	0.0304426	1135.19	42.5206	19.6096	1.73451	6.3992e-86	1.60044e-82	Null_Model_OpenChrom	human
FANTOM5_enhancer_organ	kidney_expressed_enhancers	Enhancer	415	64679	0.0064163	132.17	14.4973	19.5092	3.1399	4.58633e-85	1.14704e-81	Null_Model_OpenChrom	human
BroadChromHMM	K562	PoisedPromoter	1086	64679	0.0167906	525.227	28.8729	19.4222	2.06768	2.50665e-84	6.26913e-81	Null_Model_OpenChrom	human
Roadmapepigenomics_ActiveChromatin	CD4+_CD25-_IL17-_PMA-Ionomycin_stimulated_MACS_purified_Th_Primary	11_BivFlnk	1376	64679	0.0212743	731.869	33.2126	19.3942	1.88012	4.31952e-84	1.08031e-80	Null_Model_OpenChrom	human
Roadmapepigenomics_ActiveChromatin	CD19_Primary_Peripheral_UW	10_TssBiv	326	64679	0.00504028	91.6044	12.1795	19.2451	3.55878	7.75077e-83	1.93847e-79	Null_Model_OpenChrom	human
Roadmapepigenomics_ActiveChromatin	Colonic_Mucosa	7_Enh	5848	64679	0.0904157	4335.08	78.7277	19.2172	1.349	1.32915e-82	3.32421e-79	Null_Model_OpenChrom	human
eQTLs_GTEx_Analysis_V6	Brain_Frontal_Cortex_BA9	none	1608	64679	0.0248612	885.17	37.6278	19.21	1.8166	1.52659e-82	3.81799e-79	Null_Model_OpenChrom	human
Enhancers_Hnisz2013	CD34_fetal	Enhancer	628	64679	0.00970949	240.78	20.194	19.1749	2.60819	2.99663e-82	7.49458e-79	Null_Model_OpenChrom	human
Roadmapepigenomics_ActiveChromatin	CD4+_CD25-_IL17-_PMA-Ionomycin_stimulated_MACS_purified_Th_Primary	10_TssBiv	506	64679	0.00782325	183.083	16.8729	19.1382	2.76378	6.07391e-82	1.51908e-78	Null_Model_OpenChrom	human
Roadmapepigenomics_ActiveChromatin	Dnd41_TCell_Leukemia	12_EnhBiv	664	64679	0.0102661	268.792	20.7176	19.0759	2.47031	2.00049e-81	5.00322e-78	Null_Model_OpenChrom	human
Roadmapepigenomics_ActiveChromatin	Fetal_Muscle_Leg	10_TssBiv	665	64679	0.0102815	269.86	20.741	19.0512	2.46424	3.21295e-81	8.0356e-78	Null_Model_OpenChrom	human
Roadmapepigenomics_Histone_narrow	iPS-15b_Cell_Line	H3K4me1	16046	64679	0.248087	13714.5	122.436	19.0425	1.17	3.79373e-81	9.48813e-78	Null_Model_OpenChrom	human
Roadmapepigenomics_ActiveChromatin	CD14_Primary	12_EnhBiv	2495	64679	0.0385751	1552.47	49.5121	19.0363	1.60711	4.2674e-81	1.06728e-77	Null_Model_OpenChrom	human
Roadmapepigenomics_Histone_narrow	HUES48_Cell_Line	H3K4me1	16156	64679	0.249787	13565.1	136.404	18.9941	1.191	9.54769e-81	2.38788e-77	Null_Model_OpenChrom	human
Roadmapepigenomics_Histone_narrow	iPS_DF_19.11_Cell_Line	H3K9me3	7048	64679	0.108969	5440.66	84.6506	18.988	1.29543	1.07222e-80	2.68161e-77	Null_Model_OpenChrom	human
FANTOM5_enhancer_cell	mesenchymal_cell	Enhancer	1328	64679	0.0205322	692.136	33.625	18.9105	1.9187	4.67478e-80	1.16916e-76	Null_Model_OpenChrom	human
BroadChromHMM	NHLF	PoisedPromoter	1434	64679	0.022171	779.408	34.6389	18.8976	1.83986	5.96897e-80	1.49284e-76	Null_Model_OpenChrom	human
eQTLs_GTEx_Analysis_V6	Brain_Putamen_basal_ganglia	none	1252	64679	0.0193571	666.951	31.096	18.8143	1.8772	2.88278e-79	7.20984e-76	Null_Model_OpenChrom	human
eQTLs_GTEx_Analysis_V6	Brain_Caudate_basal_ganglia	none	1883	64679	0.029113	1088.3	42.3044	18.7854	1.73023	4.97497e-79	1.24424e-75	Null_Model_OpenChrom	human
FANTOM5_enhancer_cell	smooth_muscle_cell_of_prostate	Enhancer	393	64679	0.00607616	130.739	14.034	18.6875	3.00598	3.12677e-78	7.82005e-75	Null_Model_OpenChrom	human
eQTLs_GTEx_Analysis_V6	Pituitary	none	1658	64679	0.0256343	943.319	38.317	18.6518	1.75762	6.10601e-78	1.52711e-74	Null_Model_OpenChrom	human
FANTOM5_enhancer_cell	skeletal_muscle_cell	Enhancer	627	64679	0.00969403	249.1	20.2989	18.6168	2.51706	1.175e-77	2.93868e-74	Null_Model_OpenChrom	human
Roadmapepigenomics_ActiveChromatin	Fetal_Intestine_Small	10_TssBiv	1538	64679	0.023779	863.463	36.2422	18.6119	1.7812	1.28611e-77	3.21656e-74	Null_Model_OpenChrom	human
FANTOM5_enhancer_cell	intestinal_epithelial_cell	Enhancer	340	64679	0.00525673	102.766	12.7562	18.5975	3.30848	1.68358e-77	4.21064e-74	Null_Model_OpenChrom	human
Roadmapepigenomics_ActiveChromatin	Breast_Myoepithelial	10_TssBiv	774	64679	0.0119668	348.927	22.8892	18.5709	2.21823	2.76206e-77	6.90791e-74	Null_Model_OpenChrom	human
FANTOM5_enhancer_cell	circulating_cell	Enhancer	428	64679	0.00661729	153.672	14.7795	18.5613	2.78515	3.30275e-77	8.26018e-74	Null_Model_OpenChrom	human
FANTOM5_enhancer_cell	sensory_epithelial_cell	Enhancer	530	64679	0.00819431	211.153	17.243	18.4914	2.51003	1.21139e-76	3.02969e-73	Null_Model_OpenChrom	human
BroadChromHMM	H1-hESC	StrongEnhancer	2011	64679	0.031092	1248.34	41.2826	18.4741	1.61094	1.66848e-76	4.17287e-73	Null_Model_OpenChrom	human
FANTOM5_enhancer_cell	stromal_cell	Enhancer	735	64679	0.0113638	329.191	22.0071	18.4399	2.23275	3.14396e-76	7.86305e-73	Null_Model_OpenChrom	human
FANTOM5_enhancer_organ	testis_expressed_enhancers	Enhancer	346	64679	0.0053495	110.594	12.839	18.3352	3.12855	2.1659e-75	5.41692e-72	Null_Model_OpenChrom	human
Roadmapepigenomics_ActiveChromatin	Aorta	2_TssAFlnk	805	64679	0.0124461	372.642	23.5924	18.3262	2.16025	2.55877e-75	6.39948e-72	Null_Model_OpenChrom	human
Roadmapepigenomics_ActiveChromatin	Bone_Marrow_Derived_Mesenchymal_Stem_Cell	10_TssBiv	888	64679	0.0137293	435.743	24.7302	18.2876	2.0379	5.19195e-75	1.29851e-71	Null_Model_OpenChrom	human
Roadmapepigenomics_Histone_narrow	Brain_Germinal_Matrix	H3K4me1	7612	64679	0.117689	5966.68	90.1816	18.2445	1.27575	1.1444e-74	2.86215e-71	Null_Model_OpenChrom	human
Roadmapepigenomics_ActiveChromatin	Fetal_Heart	7_Enh	14985	64679	0.231683	12721.7	124.088	18.2391	1.1779	1.26218e-74	3.15671e-71	Null_Model_OpenChrom	human
Roadmapepigenomics_Histone_narrow	Breast_Myoepithelial_Cells	H3K4me1	20103	64679	0.310812	17512.4	142.373	18.1957	1.14793	2.79182e-74	6.98235e-71	Null_Model_OpenChrom	human
Roadmapepigenomics_ActiveChromatin	Fetal_Lung	10_TssBiv	851	64679	0.0131573	401.881	24.7149	18.172	2.11754	4.30183e-74	1.07589e-70	Null_Model_OpenChrom	human
Roadmapepigenomics_Histone_narrow	Penis_Foreskin_Keratinocyte_Primary_Cells_skin03	H3K27me3	10508	64679	0.162464	8531.89	108.926	18.1418	1.23161	7.45687e-74	1.86496e-70	Null_Model_OpenChrom	human
FANTOM5_enhancer_cell	ciliated_epithelial_cell	Enhancer	351	64679	0.0054268	116.033	12.9564	18.1352	3.025	8.39961e-74	2.10074e-70	Null_Model_OpenChrom	human
FANTOM5_enhancer_cell	enteric_smooth_muscle_cell	Enhancer	359	64679	0.00555049	120.199	13.2209	18.0624	2.98672	3.1488e-73	7.87515e-70	Null_Model_OpenChrom	human
Roadmapepigenomics_ActiveChromatin	CD19_Primary_Peripheral_UW	6_EnhG	2395	64679	0.037029	1526.17	48.1084	18.0598	1.56929	3.30303e-73	8.26088e-70	Null_Model_OpenChrom	human
Roadmapepigenomics_ActiveChromatin	Adipose_Derived_Mesenchymal_Stem_Cell	10_TssBiv	1259	64679	0.0194654	688.351	31.6406	18.0353	1.82901	5.14224e-73	1.28608e-69	Null_Model_OpenChrom	human
Roadmapepigenomics_ActiveChromatin	CD4+_CD25-_CD45RO+_Memory_Primary	11_BivFlnk	567	64679	0.00876637	230.992	18.6306	18.0353	2.45463	5.15075e-73	1.2882e-69	Null_Model_OpenChrom	human
Roadmapepigenomics_Histone_narrow	H9_Cell_Line	H3K79me1	6644	64679	0.102723	5163.12	82.1568	18.0251	1.28682	6.19452e-73	1.54925e-69	Null_Model_OpenChrom	human
FANTOM5_enhancer_cell	epithelial_cell_of_prostate	Enhancer	437	64679	0.00675644	162.218	15.3058	17.9528	2.69391	2.28245e-72	5.70841e-69	Null_Model_OpenChrom	human
SuperEnhancers_Hnisz2013	Colon_Crypt_2	SuperEnhancer	3063	64679	0.0473569	2072.98	55.1902	17.9383	1.47758	2.96341e-72	7.4115e-69	Null_Model_OpenChrom	human
FANTOM5_enhancer_cell	fat_cell	Enhancer	511	64679	0.00790056	207.921	16.9158	17.917	2.45766	4.34751e-72	1.08731e-68	Null_Model_OpenChrom	human
Roadmapepigenomics_ActiveChromatin	CD8_Naive_Primary	11_BivFlnk	587	64679	0.00907559	245.88	19.0742	17.8838	2.38734	7.88217e-72	1.97133e-68	Null_Model_OpenChrom	human
FANTOM5_enhancer_cell	cardiac_fibroblast	Enhancer	520	64679	0.0080397	214.221	17.1974	17.7805	2.4274	5.00416e-71	1.25154e-67	Null_Model_OpenChrom	human
eQTLs_GTEx_Analysis_V6	Small_Intestine_Terminal_Ileum	none	987	64679	0.01526	511.006	26.7962	17.7635	1.93148	6.77351e-71	1.69405e-67	Null_Model_OpenChrom	human
FANTOM5_enhancer_cell	placental_epithelial_cell	Enhancer	440	64679	0.00680283	162.115	15.6497	17.7566	2.71412	7.65853e-71	1.9154e-67	Null_Model_OpenChrom	human
FANTOM5_enhancer_organ	adipose_tissue_expressed_enhancers	Enhancer	353	64679	0.00545772	116.716	13.3279	17.7285	3.02443	1.26393e-70	3.16109e-67	Null_Model_OpenChrom	human
Roadmapepigenomics_ActiveChromatin	CD15_Primary	12_EnhBiv	1612	64679	0.0249231	955.178	37.0647	17.721	1.68764	1.44435e-70	3.61231e-67	Null_Model_OpenChrom	human
Roadmapepigenomics_Histone_narrow	K562_Leukemia	H4K20me1	4432	64679	0.068523	3265.22	65.9202	17.6999	1.35734	2.09892e-70	5.24939e-67	Null_Model_OpenChrom	human
Roadmapepigenomics_Histone_narrow	H9_Cell_Line	H3K79me2	3588	64679	0.055474	2544.79	59.1906	17.6246	1.40994	7.97191e-70	1.99378e-66	Null_Model_OpenChrom	human
BroadChromHMM	NHEK	PoisedPromoter	1954	64679	0.0302107	1223.34	41.4928	17.6094	1.59727	1.04303e-69	2.60862e-66	Null_Model_OpenChrom	human
FANTOM5_enhancer_cell	fibroblast_of_gingiva	Enhancer	476	64679	0.00735942	185.736	16.5172	17.5735	2.56277	1.96674e-69	4.91882e-66	Null_Model_OpenChrom	human
Roadmapepigenomics_ActiveChromatin	Colonic_Mucosa	11_BivFlnk	1524	64679	0.0235625	886.52	36.4095	17.5086	1.71908	6.16042e-69	1.54072e-65	Null_Model_OpenChrom	human
BroadChromHMM	HepG2	WeakEnhancer	8128	64679	0.125667	6524.2	92.228	17.3895	1.24582	4.95083e-68	1.2382e-64	Null_Model_OpenChrom	human
FANTOM5_enhancer_organ	heart_expressed_enhancers	Enhancer	405	64679	0.00626169	148.449	14.7923	17.3435	2.72822	1.10391e-67	2.76087e-64	Null_Model_OpenChrom	human
BroadChromHMM	HSMM	PoisedPromoter	1354	64679	0.0209342	778.135	33.4542	17.2136	1.74006	1.05057e-66	2.62748e-63	Null_Model_OpenChrom	human
Roadmapepigenomics_ActiveChromatin	Aorta	10_TssBiv	343	64679	0.00530311	116.212	13.1856	17.1996	2.95151	1.33602e-66	3.34138e-63	Null_Model_OpenChrom	human
FANTOM5_enhancer_cell	fibroblast_of_periodontium	Enhancer	456	64679	0.0070502	178.811	16.1501	17.1632	2.55018	2.50231e-66	6.25829e-63	Null_Model_OpenChrom	human
SuperEnhancers_Hnisz2013	Colon_Crypt_3	SuperEnhancer	2065	64679	0.0319269	1339.78	42.2764	17.1543	1.5413	2.91944e-66	7.30153e-63	Null_Model_OpenChrom	human
Roadmapepigenomics_Histone_narrow	4star	H3K4me1	18675	64679	0.288734	16495.5	127.249	17.1277	1.13213	4.60924e-66	1.15277e-62	Null_Model_OpenChrom	human
Roadmapepigenomics_ActiveChromatin	CD19_Primary_Peripheral_UW	3_TxFlnk	402	64679	0.00621531	149.728	14.7456	17.1083	2.68486	6.43548e-66	1.60951e-62	Null_Model_OpenChrom	human
SuperEnhancers_Hnisz2013	UCSD_Lung	SuperEnhancer	5201	64679	0.0804125	3983.09	71.8604	16.9483	1.30577	9.91281e-65	2.47919e-61	Null_Model_OpenChrom	human
eQTLs_GTEx_Analysis_V6	Prostate	none	1109	64679	0.0171462	618.408	28.9606	16.94	1.79332	1.14021e-64	2.85166e-61	Null_Model_OpenChrom	human
Roadmapepigenomics_ActiveChromatin	CD4+_CD25-_Th_Primary	11_BivFlnk	1210	64679	0.0187078	684.563	31.0242	16.9363	1.76755	1.21395e-64	3.03608e-61	Null_Model_OpenChrom	human
eQTLs_GTEx_Analysis_V6	Ovary	none	1162	64679	0.0179656	647.048	30.4644	16.9034	1.79585	2.12271e-64	5.30889e-61	Null_Model_OpenChrom	human
eQTLs_GTEx_Analysis_V6	Brain_Hypothalamus	none	953	64679	0.0147343	516.492	25.8266	16.9015	1.84514	2.19315e-64	5.48507e-61	Null_Model_OpenChrom	human
Roadmapepigenomics_ActiveChromatin	Duodenum_Smooth_Muscle	3_TxFlnk	485	64679	0.00749857	204.621	16.614	16.876	2.37023	3.37683e-64	8.44544e-61	Null_Model_OpenChrom	human
eQTLs_GTEx_Analysis_V6	Brain_Hippocampus	none	913	64679	0.0141159	487.683	25.3796	16.7582	1.87212	2.46759e-63	6.17144e-60	Null_Model_OpenChrom	human
FANTOM5_enhancer_cell	skin_fibroblast	Enhancer	770	64679	0.0119049	377.497	23.4491	16.7385	2.03975	3.43478e-63	8.59038e-60	Null_Model_OpenChrom	human
Roadmapepigenomics_Histone_narrow	H9_Cell_Line	H4K20me1	8513	64679	0.131619	7019.71	89.6477	16.6573	1.21273	1.33881e-62	3.34837e-59	Null_Model_OpenChrom	human
Roadmapepigenomics_ActiveChromatin	Fetal_Brain_Male	11_BivFlnk	785	64679	0.0121369	396.581	23.3236	16.6535	1.97942	1.42781e-62	3.57096e-59	Null_Model_OpenChrom	human
Roadmapepigenomics_Histone_narrow	H1_Cell_Line	H3K79me1	4865	64679	0.0752176	3711.38	69.2761	16.6525	1.31083	1.45014e-62	3.62679e-59	Null_Model_OpenChrom	human
Roadmapepigenomics_ActiveChromatin	CD4+_CD25-_IL17+_PMA-Ionomcyin_stimulated_Th17_Primary	11_BivFlnk	742	64679	0.011472	372.613	22.2692	16.5873	1.99134	4.3031e-62	1.07621e-58	Null_Model_OpenChrom	human
Roadmapepigenomics_Histone_narrow	IMR90_Cell_Line	H3K79me1	10376	64679	0.160423	8660.52	103.451	16.5825	1.19808	4.66384e-62	1.16643e-58	Null_Model_OpenChrom	human
FANTOM5_enhancer_cell	osteoblast	Enhancer	393	64679	0.00607616	157.469	14.216	16.5681	2.49574	5.92438e-62	1.48169e-58	Null_Model_OpenChrom	human
SuperEnhancers_Hnisz2013	UCSD_Gastric	SuperEnhancer	4350	64679	0.0672552	3236.18	67.422	16.5202	1.34418	1.31299e-61	3.28379e-58	Null_Model_OpenChrom	human
SuperEnhancers_Hnisz2013	Fetal_muscle	SuperEnhancer	3803	64679	0.0587981	2786.39	61.7771	16.4562	1.36485	3.78688e-61	9.47099e-58	Null_Model_OpenChrom	human
Enhancers_Hnisz2013	Osteoblasts	Enhancer	14797	64679	0.228776	12871.1	117.76	16.3547	1.14963	2.01503e-60	5.0396e-57	Null_Model_OpenChrom	human
Roadmapepigenomics_Histone_narrow	H1_Derived_Neuronal_Progenitor_Cultured_Cells	H2BK12ac	6839	64679	0.105738	5450.9	85.0678	16.3175	1.25465	3.70398e-60	9.26366e-57	Null_Model_OpenChrom	human
eQTLs_GTEx_Analysis_V6	Liver	none	1201	64679	0.0185686	698.55	30.8226	16.3013	1.71927	4.82999e-60	1.20798e-56	Null_Model_OpenChrom	human
Roadmapepigenomics_ActiveChromatin	Chondrocytes_from_Bone_Marrow_Derived_Mesenchymal_Stem_Cell	11_BivFlnk	913	64679	0.0141159	494.377	25.837	16.2025	1.84677	2.4211e-59	6.05516e-56	Null_Model_OpenChrom	human
BroadChromHMM	HepG2	PoisedPromoter	1569	64679	0.0242583	965.684	37.3209	16.1656	1.62475	4.4064e-59	1.10204e-55	Null_Model_OpenChrom	human
Roadmapepigenomics_ActiveChromatin	CD8_Memory_Primary	11_BivFlnk	455	64679	0.00703474	193.802	16.1583	16.1649	2.34775	4.45729e-59	1.11477e-55	Null_Model_OpenChrom	human
BroadChromHMM	H1-hESC	PoisedPromoter	3761	64679	0.0581487	2759.91	61.9469	16.1604	1.36273	4.79482e-59	1.19919e-55	Null_Model_OpenChrom	human
eQTLs_GTEx_Analysis_V6	Brain_Anterior_cingulate_cortex_BA24	none	941	64679	0.0145488	523.149	25.9031	16.1313	1.79872	7.68856e-59	1.92291e-55	Null_Model_OpenChrom	human
Roadmapepigenomics_Histone_narrow	iPS-18_Cell_Line	H3K4me1	13985	64679	0.216222	12134.9	115.175	16.0638	1.15247	2.28696e-58	5.71969e-55	Null_Model_OpenChrom	human
Roadmapepigenomics_Histone_narrow	Breast_vHMEC	H3K4me1	18020	64679	0.278607	15993.7	126.397	16.0313	1.12669	3.86381e-58	9.6634e-55	Null_Model_OpenChrom	human
Roadmapepigenomics_ActiveChromatin	CD56_Primary	12_EnhBiv	2249	64679	0.0347717	1524.35	45.4334	15.9497	1.47538	1.43246e-57	3.58259e-54	Null_Model_OpenChrom	human
FANTOM5_enhancer_cell	keratinocyte	Enhancer	424	64679	0.00655545	177.007	15.5192	15.9153	2.39539	2.4799e-57	6.20222e-54	Null_Model_OpenChrom	human
Roadmapepigenomics_ActiveChromatin	ES-WA7	10_TssBiv	1624	64679	0.0251086	1024.57	37.6811	15.9079	1.58505	2.79389e-57	6.98751e-54	Null_Model_OpenChrom	human
Roadmapepigenomics_ActiveChromatin	4star	10_TssBiv	881	64679	0.0136211	467.904	25.9919	15.8933	1.88286	3.52692e-57	8.82082e-54	Null_Model_OpenChrom	human
Roadmapepigenomics_ActiveChromatin	Brain_Inferior_Temporal_Lobe	7_Enh	9002	64679	0.13918	7566.97	90.4791	15.8604	1.18964	5.95658e-57	1.48974e-53	Null_Model_OpenChrom	human
eQTLs_GTEx_Analysis_V6	Vagina	none	719	64679	0.0111164	371.167	22.0908	15.7456	1.93713	3.68236e-56	9.20958e-53	Null_Model_OpenChrom	human
Roadmapepigenomics_ActiveChromatin	CD4+_CD25int_CD127+_Tmem_Primary	11_BivFlnk	833	64679	0.012879	444.24	24.7821	15.6872	1.87511	9.25714e-56	2.31521e-52	Null_Model_OpenChrom	human
Roadmapepigenomics_ActiveChromatin	Colon_Smooth_Muscle	10_TssBiv	967	64679	0.0149508	551.105	26.6286	15.6184	1.75466	2.72841e-55	6.82376e-52	Null_Model_OpenChrom	human
Roadmapepigenomics_Histone_narrow	NHLF_Lung_Fibroblasts	H3K4me1	10505	64679	0.162417	8979.8	97.8739	15.5833	1.16985	4.72363e-55	1.18138e-51	Null_Model_OpenChrom	human
FANTOM5_enhancer_cell	urothelial_cell	Enhancer	329	64679	0.00508666	130.078	12.8295	15.5051	2.52925	1.60308e-54	4.00932e-51	Null_Model_OpenChrom	human
Roadmapepigenomics_ActiveChromatin	Duodenum_Mucosa	11_BivFlnk	1177	64679	0.0181976	710.316	30.2732	15.4157	1.65701	6.41422e-54	1.6042e-50	Null_Model_OpenChrom	human
SuperEnhancers_Hnisz2013	HeLa	SuperEnhancer	1944	64679	0.0300561	1327.37	40.2897	15.305	1.46455	3.53987e-53	8.85322e-50	Null_Model_OpenChrom	human
Roadmapepigenomics_Histone_narrow	HepG2_Hepatocellular_Carcinoma	H3K4me1	12060	64679	0.186459	10479.9	103.311	15.2949	1.15078	4.13219e-53	1.03346e-49	Null_Model_OpenChrom	human
Roadmapepigenomics_ActiveChromatin	CD4_Naive_Primary	11_BivFlnk	476	64679	0.00735942	216.346	16.9977	15.2758	2.20018	5.5399e-53	1.38553e-49	Null_Model_OpenChrom	human
Roadmapepigenomics_ActiveChromatin	Fetal_Lung	11_BivFlnk	875	64679	0.0135283	487.397	25.3823	15.2706	1.79525	5.99979e-53	1.50055e-49	Null_Model_OpenChrom	human
Roadmapepigenomics_Histone_narrow	Bone_Marrow_Derived_Mesenchymal_Stem_Cell_Cultured_Cells	H3K4me1	17625	64679	0.2725	15779.2	121.444	15.1992	1.11698	1.79072e-52	4.4786e-49	Null_Model_OpenChrom	human
FANTOM5_enhancer_cell	gingival_epithelial_cell	Enhancer	434	64679	0.00671006	195.712	15.7025	15.1752	2.21754	2.58152e-52	6.45639e-49	Null_Model_OpenChrom	human
Roadmapepigenomics_ActiveChromatin	Bone_Marrow_Derived_Mesenchymal_Stem_Cell	11_BivFlnk	432	64679	0.00667914	192.196	15.8567	15.1232	2.24771	5.68936e-52	1.42291e-48	Null_Model_OpenChrom	human
Roadmapepigenomics_ActiveChromatin	CD3_Primary_Cord_BI	10_TssBiv	1175	64679	0.0181666	725.777	29.7087	15.1209	1.61895	5.89332e-52	1.47392e-48	Null_Model_OpenChrom	human
Roadmapepigenomics_Histone_narrow	HUES6_Cell_Line	H3K4me1	17932	64679	0.277246	16069.5	123.563	15.073	1.1159	1.21854e-51	3.04756e-48	Null_Model_OpenChrom	human
Roadmapepigenomics_Histone_narrow	H1_Cell_Line	H3K4me1	12592	64679	0.194685	10952	109.381	14.9936	1.14975	4.04138e-51	1.01075e-47	Null_Model_OpenChrom	human
Roadmapepigenomics_ActiveChromatin	CD4+_CD25-_CD45RA+_Naive_Primary	11_BivFlnk	908	64679	0.0140386	526.897	25.4365	14.9825	1.7233	4.77524e-51	1.19429e-47	Null_Model_OpenChrom	human
Roadmapepigenomics_ActiveChromatin	ES-I3	2_TssAFlnk	2135	64679	0.0330092	1482.18	43.7774	14.9122	1.44044	1.37359e-50	3.43536e-47	Null_Model_OpenChrom	human
eQTLs_GTEx_Analysis_V6	Uterus	none	659	64679	0.0101888	343.446	21.2471	14.8516	1.91879	3.39566e-50	8.49254e-47	Null_Model_OpenChrom	human
Roadmapepigenomics_ActiveChromatin	Brain_Cingulate_Gyrus	7_Enh	9350	64679	0.14456	7955.53	94.1572	14.81	1.17528	6.31352e-50	1.57901e-46	Null_Model_OpenChrom	human
SuperEnhancers_Hnisz2013	CD34_adult	SuperEnhancer	462	64679	0.00714297	214.971	16.6866	14.804	2.14913	6.89662e-50	1.72484e-46	Null_Model_OpenChrom	human
Roadmapepigenomics_ActiveChromatin	CD4+_CD25int_CD127+_Tmem_Primary	10_TssBiv	508	64679	0.00785417	245.077	17.7645	14.8005	2.07282	7.27138e-50	1.81857e-46	Null_Model_OpenChrom	human
Roadmapepigenomics_Histone_narrow	Fetal_Kidney	H3K4me1	5762	64679	0.0890861	4687.93	72.8828	14.737	1.22911	1.86591e-49	4.66663e-46	Null_Model_OpenChrom	human
Roadmapepigenomics_ActiveChromatin	Fetal_Brain_Male	12_EnhBiv	2558	64679	0.0395492	1872.93	46.625	14.6932	1.36577	3.56474e-49	8.91542e-46	Null_Model_OpenChrom	human
FANTOM5_enhancer_cell	preadipocyte	Enhancer	592	64679	0.00915289	302.942	19.702	14.6715	1.95417	4.90988e-49	1.22796e-45	Null_Model_OpenChrom	human
SuperEnhancers_Hnisz2013	VACO_400	SuperEnhancer	1633	64679	0.0252478	1082.58	37.5394	14.6624	1.50843	5.60811e-49	1.40259e-45	Null_Model_OpenChrom	human
Roadmapepigenomics_ActiveChromatin	CD34	11_BivFlnk	1181	64679	0.0182594	725.345	31.0965	14.6529	1.62819	6.44976e-49	1.61309e-45	Null_Model_OpenChrom	human
Roadmapepigenomics_ActiveChromatin	Brain_Hippocampus_Middle	7_Enh	10337	64679	0.15982	8965.14	93.6659	14.6463	1.15302	7.11627e-49	1.77978e-45	Null_Model_OpenChrom	human
SuperEnhancers_Hnisz2013	UCSD_Esophagus	SuperEnhancer	4269	64679	0.0660029	3326.55	64.6751	14.5721	1.28331	2.1133e-48	5.28537e-45	Null_Model_OpenChrom	human
Roadmapepigenomics_Histone_narrow	Penis_Foreskin_Keratinocyte_Primary_Cells_skin02	H3K4me1	13946	64679	0.215619	12313.8	112.07	14.564	1.13255	2.37957e-48	5.95131e-45	Null_Model_OpenChrom	human
Enhancers_Hnisz2013	UCSD_Aorta	Enhancer	8168	64679	0.126285	6906.45	86.7546	14.5416	1.18266	3.29922e-48	8.25134e-45	Null_Model_OpenChrom	human
FANTOM5_enhancer_cell	hair_follicle_cell	Enhancer	330	64679	0.00510212	134.916	13.4825	14.4694	2.44596	9.45964e-48	2.36586e-44	Null_Model_OpenChrom	human
Roadmapepigenomics_ActiveChromatin	Brain_Substantia_Nigra	7_Enh	9888	64679	0.152878	8457.13	99.0744	14.4424	1.16919	1.40034e-47	3.50224e-44	Null_Model_OpenChrom	human
Roadmapepigenomics_ActiveChromatin	CD4+_CD25-_CD45RA+_Naive_Primary	10_TssBiv	432	64679	0.00667914	204.457	15.8	14.4015	2.11292	2.53257e-47	6.33396e-44	Null_Model_OpenChrom	human
SuperEnhancers_Hnisz2013	UCSD_Adrenal_Gland	SuperEnhancer	2564	64679	0.0396419	1882.23	47.359	14.3957	1.36221	2.75163e-47	6.88182e-44	Null_Model_OpenChrom	human
Roadmapepigenomics_ActiveChromatin	ES-WA7	2_TssAFlnk	354	64679	0.00547318	154.665	13.8683	14.3734	2.28881	3.79839e-47	9.49978e-44	Null_Model_OpenChrom	human
Roadmapepigenomics_Histone_narrow	Dnd41_TCell_Leukemia	H4K20me1	6989	64679	0.108057	5824.31	81.2167	14.3405	1.19997	6.10651e-47	1.52724e-43	Null_Model_OpenChrom	human
Roadmapepigenomics_ActiveChromatin	Brain_Angular_Gyrus	7_Enh	8491	64679	0.131279	7237.3	87.494	14.329	1.17323	7.21138e-47	1.80357e-43	Null_Model_OpenChrom	human
FANTOM5_enhancer_cell	mammary_epithelial_cell	Enhancer	364	64679	0.00562779	156.604	14.5233	14.2802	2.32433	1.45464e-46	3.63805e-43	Null_Model_OpenChrom	human
Roadmapepigenomics_ActiveChromatin	Chondrocytes_from_Bone_Marrow_Derived_Mesenchymal_Stem_Cell	10_TssBiv	742	64679	0.011472	418.616	22.7416	14.2199	1.77251	3.44705e-46	8.62108e-43	Null_Model_OpenChrom	human
Roadmapepigenomics_ActiveChromatin	CD4_Memory_Primary	11_BivFlnk	376	64679	0.00581332	175.055	14.1409	14.2102	2.1479	3.95764e-46	9.89806e-43	Null_Model_OpenChrom	human
Roadmapepigenomics_ActiveChromatin	CD19_Primary_Cord_BI	11_BivFlnk	763	64679	0.0117967	439.174	22.8334	14.1821	1.73735	5.91228e-46	1.47866e-42	Null_Model_OpenChrom	human
BroadChromHMM	NHEK	StrongEnhancer	7503	64679	0.116004	6276.08	86.7771	14.1387	1.19549	1.09642e-45	2.74215e-42	Null_Model_OpenChrom	human
SuperEnhancers_Hnisz2013	BI_Duodenum_Smooth_Muscle	SuperEnhancer	2745	64679	0.0424404	2023.97	51.1432	14.0983	1.35625	1.94526e-45	4.8651e-42	Null_Model_OpenChrom	human
Roadmapepigenomics_ActiveChromatin	Fetal_Intestine_Small	3_TxFlnk	926	64679	0.0143169	553.162	26.5278	14.0546	1.67401	3.60921e-45	9.02662e-42	Null_Model_OpenChrom	human
Roadmapepigenomics_Histone_narrow	H1_Cell_Line	H3K79me2	3888	64679	0.0601122	3029.34	61.1759	14.0359	1.28345	4.70009e-45	1.17549e-41	Null_Model_OpenChrom	human
Roadmapepigenomics_Histone_narrow	Left_Ventricle	H3K4me1	13085	64679	0.202307	11591.3	106.803	13.9854	1.12886	9.56506e-45	2.39222e-41	Null_Model_OpenChrom	human
Roadmapepigenomics_ActiveChromatin	CD4+_CD25-_IL17-_PMA-Ionomycin_stimulated_MACS_purified_Th_Primary	3_TxFlnk	813	64679	0.0125698	477.471	24.1273	13.9066	1.70272	2.88713e-44	7.22072e-41	Null_Model_OpenChrom	human
Roadmapepigenomics_ActiveChromatin	CD19_Primary_Peripheral_UW	12_EnhBiv	2274	64679	0.0351582	1662.02	44.0706	13.8863	1.36821	3.8356e-44	9.59285e-41	Null_Model_OpenChrom	human
Roadmapepigenomics_Histone_narrow	hESC_Derived_CD56+_Ectoderm_Cultured_Cells	H3K27me3	7158	64679	0.11067	6013	82.5634	13.8681	1.19042	4.94227e-44	1.23606e-40	Null_Model_OpenChrom	human
Roadmapepigenomics_ActiveChromatin	Fetal_Brain_Female	11_BivFlnk	1137	64679	0.0175791	731.412	29.3275	13.8296	1.55453	8.44664e-44	2.11251e-40	Null_Model_OpenChrom	human
Roadmapepigenomics_Histone_narrow	H9_Cell_Line	H3K9me3	4419	64679	0.068322	3544.95	63.3615	13.7946	1.24656	1.3726e-43	3.43288e-40	Null_Model_OpenChrom	human
Roadmapepigenomics_Histone_narrow	HepG2_Hepatocellular_Carcinoma	H3K27me3	7237	64679	0.111891	6127.67	80.5358	13.7743	1.18104	1.81849e-43	4.54805e-40	Null_Model_OpenChrom	human
Roadmapepigenomics_ActiveChromatin	CD3_Primary_Cord_BI	11_BivFlnk	858	64679	0.0132655	521.908	24.6502	13.6345	1.64397	1.24919e-42	3.12422e-39	Null_Model_OpenChrom	human
Roadmapepigenomics_ActiveChromatin	Duodenum_Smooth_Muscle	7_Enh	7418	64679	0.114689	6320.81	81.1406	13.5221	1.17358	5.79278e-42	1.44877e-38	Null_Model_OpenChrom	human
Roadmapepigenomics_ActiveChromatin	Adipose_Nuclei	11_BivFlnk	1420	64679	0.0219546	957.055	34.4384	13.4427	1.48372	1.69887e-41	4.24888e-38	Null_Model_OpenChrom	human
BroadChromHMM	HUVEC	WeakEnhancer	7606	64679	0.117596	6496.89	82.5673	13.4329	1.17071	1.94079e-41	4.85391e-38	Null_Model_OpenChrom	human
Roadmapepigenomics_ActiveChromatin	Adipose_Nuclei	7_Enh	11814	64679	0.182656	10444.9	102.339	13.3778	1.13107	4.07602e-41	1.01941e-37	Null_Model_OpenChrom	human
SuperEnhancers_Hnisz2013	HCT-116	SuperEnhancer	1428	64679	0.0220783	967.218	34.6303	13.3057	1.4764	1.07168e-40	2.68028e-37	Null_Model_OpenChrom	human
Roadmapepigenomics_ActiveChromatin	Duodenum_Smooth_Muscle	10_TssBiv	1488	64679	0.0230059	1020.42	35.1584	13.2993	1.45823	1.16824e-40	2.92177e-37	Null_Model_OpenChrom	human
Roadmapepigenomics_Histone_narrow	HSMM_Skeletal_Muscle_Myoblasts	H3K4me1	13234	64679	0.20461	11785.5	109.068	13.2809	1.12291	1.49426e-40	3.73714e-37	Null_Model_OpenChrom	human
Roadmapepigenomics_Histone_narrow	H1_Cell_Line	H3K23ac	1460	64679	0.022573	1003.91	34.3544	13.2759	1.45431	1.5963e-40	3.99235e-37	Null_Model_OpenChrom	human
SuperEnhancers_Hnisz2013	Fetal_Intestine_Large	SuperEnhancer	2969	64679	0.0459036	2278.78	52.0252	13.2671	1.30289	1.79521e-40	4.48982e-37	Null_Model_OpenChrom	human
Roadmapepigenomics_ActiveChromatin	Duodenum_Smooth_Muscle	11_BivFlnk	1148	64679	0.0177492	749.463	30.0424	13.2659	1.53176	1.82616e-40	4.56723e-37	Null_Model_OpenChrom	human
FANTOM5_enhancer_cell	myoblast	Enhancer	337	64679	0.00521035	154.007	13.9175	13.1484	2.18821	8.69e-40	2.17337e-36	Null_Model_OpenChrom	human
Roadmapepigenomics_ActiveChromatin	Esophagus	7_Enh	7796	64679	0.120534	6698.75	84.4553	12.9921	1.1638	6.78102e-39	1.69593e-35	Null_Model_OpenChrom	human
Roadmapepigenomics_ActiveChromatin	Colonic_Mucosa	3_TxFlnk	342	64679	0.00528765	159.653	14.1926	12.848	2.14214	4.41047e-38	1.10306e-34	Null_Model_OpenChrom	human
Enhancers_Hnisz2013	MCF-7	Enhancer	2074	64679	0.032066	1530.18	42.6318	12.7562	1.35539	1.44e-37	3.60143e-34	Null_Model_OpenChrom	human
Roadmapepigenomics_ActiveChromatin	CD19_Primary_Cord_BI	6_EnhG	1271	64679	0.0196509	856.792	32.6509	12.686	1.48344	3.53672e-37	8.84534e-34	Null_Model_OpenChrom	human
Roadmapepigenomics_ActiveChromatin	A549_EtOH_0.02pct_Lung_Carcinoma	10_TssBiv	789	64679	0.0121987	493.581	23.5098	12.5658	1.59852	1.6288e-36	4.07362e-33	Null_Model_OpenChrom	human
SuperEnhancers_Hnisz2013	Colon_Crypt_1	SuperEnhancer	2298	64679	0.0355293	1738.68	44.5536	12.5539	1.32169	1.89314e-36	4.73475e-33	Null_Model_OpenChrom	human
SuperEnhancers_Hnisz2013	Fetal_Intestine	SuperEnhancer	2775	64679	0.0429042	2132.84	51.1763	12.5481	1.30109	2.03595e-36	5.0919e-33	Null_Model_OpenChrom	human
SuperEnhancers_Hnisz2013	RPMI-8402	SuperEnhancer	878	64679	0.0135747	557.679	25.5349	12.5444	1.57438	2.13218e-36	5.33258e-33	Null_Model_OpenChrom	human
SuperEnhancers_Hnisz2013	BI_Skeletal_Muscle	SuperEnhancer	2405	64679	0.0371836	1833.19	45.7088	12.5098	1.31192	3.30085e-36	8.25543e-33	Null_Model_OpenChrom	human
SuperEnhancers_Hnisz2013	UCSD_Right_Ventricle	SuperEnhancer	1069	64679	0.0165278	711.01	28.7571	12.4488	1.5035	7.10183e-36	1.77617e-32	Null_Model_OpenChrom	human
Roadmapepigenomics_ActiveChromatin	Brain_Anterior_Caudate	7_Enh	9460	64679	0.146261	8300.51	93.3992	12.4143	1.13969	1.09247e-35	2.73226e-32	Null_Model_OpenChrom	human
Roadmapepigenomics_ActiveChromatin	ES-WA7	7_Enh	5830	64679	0.0901374	4953.26	71.0797	12.3345	1.177	2.95119e-35	7.38093e-32	Null_Model_OpenChrom	human
Roadmapepigenomics_ActiveChromatin	Colon_Smooth_Muscle	11_BivFlnk	522	64679	0.00807063	293.023	18.6763	12.2603	1.78143	7.39811e-35	1.85027e-31	Null_Model_OpenChrom	human
Enhancers_Hnisz2013	IMR90	Enhancer	3882	64679	0.0600195	3163.03	58.8797	12.2109	1.22731	1.3593e-34	3.39962e-31	Null_Model_OpenChrom	human
GeneSets_100000	HMEC_AllelicExpression	AllelicExpression	33032	64679	0.510707	31351.8	137.757	12.1972	1.05359	1.60849e-34	4.02284e-31	Null_Model_OpenChrom	human
Roadmapepigenomics_Histone_narrow	HSMMtube_Skeletal_Muscle_Myotubes_Derived_from_HSMM	H3K4me1	15870	64679	0.245366	14472.5	114.809	12.1721	1.09656	2.18828e-34	5.47288e-31	Null_Model_OpenChrom	human
SuperEnhancers_Hnisz2013	VACO_503	SuperEnhancer	845	64679	0.0130645	539.223	25.2104	12.129	1.56707	3.70655e-34	9.27009e-31	Null_Model_OpenChrom	human
Roadmapepigenomics_Histone_narrow	H1_Cell_Line	H2BK120ac	2561	64679	0.0395955	1979.44	48.2265	12.0589	1.2938	8.70971e-34	2.1783e-30	Null_Model_OpenChrom	human
Roadmapepigenomics_ActiveChromatin	CD56_Primary	6_EnhG	1920	64679	0.0296851	1434.33	40.6579	11.9452	1.3386	3.43825e-33	8.59906e-30	Null_Model_OpenChrom	human
Roadmapepigenomics_ActiveChromatin	Adult_Liver	11_BivFlnk	354	64679	0.00547318	178.387	14.7852	11.8776	1.98445	7.73611e-33	1.9348e-29	Null_Model_OpenChrom	human
Roadmapepigenomics_Histone_narrow	HepG2_Hepatocellular_Carcinoma	H4K20me1	2233	64679	0.0345243	1715.15	43.8339	11.814	1.30193	1.65257e-32	4.13308e-29	Null_Model_OpenChrom	human
SuperEnhancers_Hnisz2013	UCSD_Pancreas	SuperEnhancer	1703	64679	0.02633	1257.19	37.7375	11.8134	1.35461	1.66381e-32	4.16119e-29	Null_Model_OpenChrom	human
SuperEnhancers_Hnisz2013	BI_Brain_Hippocampus_Middle_150	SuperEnhancer	3270	64679	0.0505574	2645.78	53.3462	11.7013	1.23593	6.27243e-32	1.56874e-28	Null_Model_OpenChrom	human
Roadmapepigenomics_ActiveChromatin	Colonic_Mucosa	10_TssBiv	991	64679	0.0153218	673.805	27.2569	11.6372	1.47075	1.33296e-31	3.33373e-28	Null_Model_OpenChrom	human
GeneSets_100000	HUVEC_AllelicExpression	AllelicExpression	31968	64679	0.494256	30434.9	132.297	11.5883	1.05037	2.36185e-31	5.90699e-28	Null_Model_OpenChrom	human
Roadmapepigenomics_Histone_narrow	NH-A_Astrocytes	H4K20me1	8079	64679	0.124909	7098.29	86.0003	11.4036	1.13816	2.00623e-30	5.01758e-27	Null_Model_OpenChrom	human
SuperEnhancers_Hnisz2013	UCSD_Bladder	SuperEnhancer	858	64679	0.0132655	569.302	25.625	11.2663	1.50711	9.62745e-30	2.40783e-26	Null_Model_OpenChrom	human
Roadmapepigenomics_ActiveChromatin	Brain_Inferior_Temporal_Lobe	11_BivFlnk	591	64679	0.00913743	368.759	19.8417	11.2007	1.60267	2.02344e-29	5.06062e-26	Null_Model_OpenChrom	human
SuperEnhancers_Hnisz2013	BI_Brain_Anterior_Caudate	SuperEnhancer	3380	64679	0.0522581	2782.46	53.7725	11.1124	1.21475	5.46215e-29	1.36608e-25	Null_Model_OpenChrom	human
Roadmapepigenomics_ActiveChromatin	Fetal_Intestine_Small	7_Enh	8198	64679	0.126749	7268.86	84.3032	11.0214	1.12782	1.50666e-28	3.76816e-25	Null_Model_OpenChrom	human
Roadmapepigenomics_ActiveChromatin	Brain_Dorsolateral_Prefrontal_Cortex	7_Enh	7687	64679	0.118848	6781.1	82.6913	10.9552	1.13359	3.13746e-28	7.84678e-25	Null_Model_OpenChrom	human
GeneSets_100000	H1ESC_AllelicExpression	AllelicExpression	36598	64679	0.565841	35178.4	132.808	10.6892	1.04035	5.72061e-27	1.43072e-23	Null_Model_OpenChrom	human
SuperEnhancers_Hnisz2013	HepG2	SuperEnhancer	652	64679	0.0100806	423.061	21.5695	10.614	1.54115	1.28206e-26	3.20644e-23	Null_Model_OpenChrom	human
Roadmapepigenomics_ActiveChromatin	Fetal_Brain_Male	10_TssBiv	384	64679	0.00593701	215.304	15.9345	10.5869	1.78353	1.71429e-26	4.28745e-23	Null_Model_OpenChrom	human
BroadChromHMM	NHLF	StrongEnhancer	6035	64679	0.0933069	5249.65	74.9013	10.4851	1.1496	5.05493e-26	1.26424e-22	Null_Model_OpenChrom	human
SuperEnhancers_Hnisz2013	UCSD_Psoas_Muscle	SuperEnhancer	1959	64679	0.030288	1528.34	41.6719	10.3345	1.28178	2.46107e-25	6.15514e-22	Null_Model_OpenChrom	human
Roadmapepigenomics_ActiveChromatin	Fetal_Lung	3_TxFlnk	326	64679	0.00504028	182.152	13.9442	10.316	1.78972	2.9835e-25	7.46173e-22	Null_Model_OpenChrom	human
Enhancers_Hnisz2013	HSMMtube	Enhancer	12773	64679	0.197483	11680.2	106.755	10.2367	1.09356	6.78881e-25	1.69788e-21	Null_Model_OpenChrom	human
GeneSets_100000	HSMM_AllelicExpression	AllelicExpression	34488	64679	0.533218	33066	139.95	10.1609	1.04301	1.48181e-24	3.706e-21	Null_Model_OpenChrom	human
Roadmapepigenomics_ActiveChromatin	Fetal_Intestine_Large	7_Enh	8825	64679	0.136443	7964.51	84.784	10.1492	1.10804	1.66979e-24	4.17615e-21	Null_Model_OpenChrom	human
Roadmapepigenomics_Histone_narrow	H9_Cell_Line	H2AK5ac	1297	64679	0.0200529	965.143	32.7882	10.1212	1.34384	2.22406e-24	5.56238e-21	Null_Model_OpenChrom	human
Roadmapepigenomics_ActiveChromatin	CD4+_CD25+_CD127-_Treg_Primary	12_EnhBiv	1086	64679	0.0167906	799.116	28.5719	10.0408	1.359	5.04409e-24	1.26153e-20	Null_Model_OpenChrom	human
SuperEnhancers_Hnisz2013	H1	SuperEnhancer	706	64679	0.0109154	473.132	23.2868	9.99999	1.49218	7.62051e-24	1.90589e-20	Null_Model_OpenChrom	human
Roadmapepigenomics_ActiveChromatin	CD4+_CD25-_CD45RO+_Memory_Primary	12_EnhBiv	1331	64679	0.0205785	1001.54	33.0548	9.96713	1.32896	1.0614e-23	2.65457e-20	Null_Model_OpenChrom	human
SuperEnhancers_Hnisz2013	UCSD_Left_Ventricle	SuperEnhancer	3831	64679	0.059231	3268.46	57.4228	9.79641	1.17211	5.83299e-23	1.45883e-19	Null_Model_OpenChrom	human
Roadmapepigenomics_ActiveChromatin	CD34	3_TxFlnk	662	64679	0.0102352	447.376	22.0265	9.7439	1.47974	9.79485e-23	2.44969e-19	Null_Model_OpenChrom	human
SuperEnhancers_Hnisz2013	NHLF	SuperEnhancer	1928	64679	0.0298087	1528.8	41.0362	9.72794	1.26112	1.14594e-22	2.866e-19	Null_Model_OpenChrom	human
Enhancers_Hnisz2013	Astrocytes	Enhancer	6133	64679	0.0948221	5415.1	74.0042	9.70074	1.13257	1.49666e-22	3.74314e-19	Null_Model_OpenChrom	human
SuperEnhancers_Hnisz2013	BI_Adipose_Nuclei	SuperEnhancer	3160	64679	0.0488567	2655.82	52.8556	9.53886	1.18984	7.22059e-22	1.80587e-18	Null_Model_OpenChrom	human
SuperEnhancers_Hnisz2013	UCSD_Right_Atrium	SuperEnhancer	3150	64679	0.0487021	2653.75	52.6949	9.41739	1.187	2.31216e-21	5.78271e-18	Null_Model_OpenChrom	human
Roadmapepigenomics_ActiveChromatin	Adipose_Nuclei	10_TssBiv	430	64679	0.00664822	270.851	17.1221	9.29493	1.58759	7.36519e-21	1.84203e-17	Null_Model_OpenChrom	human
Roadmapepigenomics_ActiveChromatin	Breast_vHMEC	12_EnhBiv	850	64679	0.0131418	613.792	25.4806	9.2701	1.38483	9.29817e-21	2.32547e-17	Null_Model_OpenChrom	human
Roadmapepigenomics_Histone_narrow	Thymus	H3K9me3	873	64679	0.0134974	632.384	26.0838	9.22476	1.38049	1.42102e-20	3.55397e-17	Null_Model_OpenChrom	human
BroadChromHMM	HepG2	StrongEnhancer	3557	64679	0.0549947	3035.18	57.0557	9.14582	1.17192	2.95903e-20	7.40054e-17	Null_Model_OpenChrom	human
Roadmapepigenomics_Histone_narrow	IMR90_Cell_Line	H4K20me1	6273	64679	0.0969867	5607.38	75.3087	8.8386	1.1187	4.84649e-19	1.21211e-15	Null_Model_OpenChrom	human
Roadmapepigenomics_ActiveChromatin	CD4+_CD25-_IL17+_PMA-Ionomcyin_stimulated_Th17_Primary	12_EnhBiv	1076	64679	0.016636	814.361	29.8261	8.77215	1.32128	8.76444e-19	2.19199e-15	Null_Model_OpenChrom	human
Roadmapepigenomics_ActiveChromatin	Adipose_Derived_Mesenchymal_Stem_Cell	11_BivFlnk	492	64679	0.0076068	321.984	19.4869	8.72462	1.52803	1.33533e-18	3.33966e-15	Null_Model_OpenChrom	human
Roadmapepigenomics_ActiveChromatin	Fetal_Intestine_Small	12_EnhBiv	1303	64679	0.0201456	1017.67	33.0508	8.63322	1.28038	2.9823e-18	7.45873e-15	Null_Model_OpenChrom	human
Roadmapepigenomics_ActiveChromatin	Breast_Myoepithelial	11_BivFlnk	635	64679	0.00981772	449.915	21.7011	8.52884	1.41138	7.39086e-18	1.84845e-14	Null_Model_OpenChrom	human
Roadmapepigenomics_Histone_narrow	iPS_DF_6.9_Cell_Line	H3K4me1	8377	64679	0.129517	7679.7	83.2414	8.3768	1.0908	2.71924e-17	6.80083e-14	Null_Model_OpenChrom	human
Roadmapepigenomics_ActiveChromatin	Brain_Hippocampus_Middle	11_BivFlnk	955	64679	0.0147652	713.427	28.8525	8.37269	1.33861	2.81581e-17	7.04234e-14	Null_Model_OpenChrom	human
Roadmapepigenomics_Histone_narrow	Osteoblasts	H4K20me1	6638	64679	0.10263	5988.44	77.9526	8.3328	1.10847	3.94754e-17	9.87279e-14	Null_Model_OpenChrom	human
Roadmapepigenomics_ActiveChromatin	CD3_Primary_Peripheral_UW	3_TxFlnk	346	64679	0.0053495	217.909	15.4424	8.29474	1.58782	5.44131e-17	1.36087e-13	Null_Model_OpenChrom	human
Roadmapepigenomics_ActiveChromatin	Brain_Dorsolateral_Prefrontal_Cortex	11_BivFlnk	446	64679	0.00689559	298.886	17.8916	8.22249	1.49221	9.96604e-17	2.49251e-13	Null_Model_OpenChrom	human
SuperEnhancers_Hnisz2013	VACO_9M	SuperEnhancer	1515	64679	0.0234234	1221.56	36.3136	8.08074	1.24022	3.21883e-16	8.05028e-13	Null_Model_OpenChrom	human
Roadmapepigenomics_ActiveChromatin	Duodenum_Mucosa	10_TssBiv	890	64679	0.0137603	677.711	26.5301	8.00181	1.31324	6.13019e-16	1.53316e-12	Null_Model_OpenChrom	human
Roadmapepigenomics_Histone_narrow	Penis_Foreskin_Fibroblast_Primary_Cells_skin02	H3K36me3	11263	64679	0.174137	10501.2	95.365	7.98795	1.07254	6.86022e-16	1.71574e-12	Null_Model_OpenChrom	human
Roadmapepigenomics_ActiveChromatin	Brain_Cingulate_Gyrus	11_BivFlnk	581	64679	0.00898282	415.415	21.0816	7.85451	1.3986	2.00673e-15	5.01883e-12	Null_Model_OpenChrom	human
Roadmapepigenomics_ActiveChromatin	Fetal_Intestine_Large	12_EnhBiv	1232	64679	0.0190479	988.935	31.7979	7.64405	1.24578	1.05249e-14	2.63228e-11	Null_Model_OpenChrom	human
Roadmapepigenomics_Histone_narrow	Brain_Germinal_Matrix	H3K9me3	2358	64679	0.036457	2030.44	44.5859	7.34675	1.16133	1.01545e-13	2.53965e-10	Null_Model_OpenChrom	human
Roadmapepigenomics_Histone_narrow	Mesenchymal_Stem_Cell_Derived_Adipocyte_Cultured_Cells	H3K4me1	18935	64679	0.292753	18030.5	123.445	7.3268	1.05016	1.17857e-13	2.9476e-10	Null_Model_OpenChrom	human
Roadmapepigenomics_Histone_narrow	Dnd41_TCell_Leukemia	H3K36me3	9065	64679	0.140154	8411.98	89.9336	7.26116	1.07763	1.91896e-13	4.79932e-10	Null_Model_OpenChrom	human
Roadmapepigenomics_ActiveChromatin	Brain_Hippocampus_Middle	10_TssBiv	936	64679	0.0144715	732.777	28.146	7.22032	1.27733	2.59333e-13	6.48592e-10	Null_Model_OpenChrom	human
SuperEnhancers_Hnisz2013	BI_Brain_Hippocampus_Middle	SuperEnhancer	3541	64679	0.0547473	3127.46	57.4502	7.19821	1.13223	3.05049e-13	7.62928e-10	Null_Model_OpenChrom	human
SuperEnhancers_Hnisz2013	LnCAP	SuperEnhancer	1574	64679	0.0243356	1291.09	39.435	7.17401	1.21912	3.64156e-13	9.10753e-10	Null_Model_OpenChrom	human
Roadmapepigenomics_ActiveChromatin	Dnd41_TCell_Leukemia	6_EnhG	1283	64679	0.0198364	1052.74	32.2583	7.13794	1.21872	4.73702e-13	1.18473e-09	Null_Model_OpenChrom	human
Roadmapepigenomics_ActiveChromatin	CD8_Memory_Primary	12_EnhBiv	693	64679	0.0107145	523.341	23.837	7.11746	1.32419	5.49652e-13	1.37468e-09	Null_Model_OpenChrom	human
Roadmapepigenomics_Histone_narrow	K562_Leukemia	H3K9me1	1342	64679	0.0207486	1115.02	31.9674	7.1003	1.20356	6.22429e-13	1.5567e-09	Null_Model_OpenChrom	human
Roadmapepigenomics_Histone_narrow	IMR90_Cell_Line	H2BK20ac	7837	64679	0.121168	7281.57	81.0065	6.85658	1.07628	3.52637e-12	8.81945e-09	Null_Model_OpenChrom	human
Roadmapepigenomics_ActiveChromatin	Brain_Inferior_Temporal_Lobe	10_TssBiv	755	64679	0.011673	587.502	24.4372	6.8542	1.2851	3.58552e-12	8.96737e-09	Null_Model_OpenChrom	human
Roadmapepigenomics_ActiveChromatin	Esophagus	11_BivFlnk	431	64679	0.00666368	313.251	17.7196	6.64514	1.37589	1.51461e-11	3.78804e-08	Null_Model_OpenChrom	human
Roadmapepigenomics_ActiveChromatin	CD8_Naive_Primary	12_EnhBiv	970	64679	0.0149971	774.096	29.5601	6.62732	1.25307	1.70921e-11	4.27472e-08	Null_Model_OpenChrom	human
Roadmapepigenomics_Histone_narrow	Psoas_Muscle	H3K4me1	8330	64679	0.12879	7790.04	85.0598	6.34798	1.06931	1.09079e-10	2.72807e-07	Null_Model_OpenChrom	human
Enhancers_Hnisz2013	UCSD_Ovary	Enhancer	4843	64679	0.0748775	4419.31	66.9174	6.33152	1.09587	1.21377e-10	3.03563e-07	Null_Model_OpenChrom	human
SuperEnhancers_Hnisz2013	BI_Brain_Mid_Frontal_Lobe	SuperEnhancer	899	64679	0.0138994	725.204	27.9662	6.21451	1.23965	2.57427e-10	6.43826e-07	Null_Model_OpenChrom	human
Roadmapepigenomics_ActiveChromatin	Brain_Substantia_Nigra	10_TssBiv	432	64679	0.00667914	317.404	18.5437	6.1798	1.36104	3.20912e-10	8.026e-07	Null_Model_OpenChrom	human
Roadmapepigenomics_ActiveChromatin	Brain_Cingulate_Gyrus	10_TssBiv	840	64679	0.0129872	686.674	25.4647	6.02111	1.22329	8.66115e-10	2.16615e-06	Null_Model_OpenChrom	human
SuperEnhancers_Hnisz2013	BI_Brain_Cingulate_Gyrus	SuperEnhancer	3368	64679	0.0520725	3035.05	55.5482	5.9939	1.1097	1.02435e-09	2.56191e-06	Null_Model_OpenChrom	human
SuperEnhancers_Hnisz2013	HMEC	SuperEnhancer	2133	64679	0.0329782	1868.8	44.0882	5.99259	1.14138	1.03261e-09	2.58255e-06	Null_Model_OpenChrom	human
Roadmapepigenomics_Histone_narrow	Right_Atrium	H3K4me1	11500	64679	0.177801	10915.5	97.7819	5.97785	1.05355	1.1305e-09	2.82739e-06	Null_Model_OpenChrom	human
BroadChromHMM	HMEC	PoisedPromoter	917	64679	0.0141777	748.121	28.2536	5.97725	1.22574	1.13467e-09	2.83781e-06	Null_Model_OpenChrom	human
BroadChromHMM	HMEC	WeakEnhancer	10591	64679	0.163747	10040.8	92.9005	5.92294	1.0548	1.58121e-09	3.9546e-06	Null_Model_OpenChrom	human
SuperEnhancers_Hnisz2013	BI_Brain_Inferior_Temporal_Lobe	SuperEnhancer	3551	64679	0.0549019	3220.32	55.8905	5.9166	1.10269	1.64337e-09	4.11007e-06	Null_Model_OpenChrom	human
EnhancerFinder_Enhancers	Brain	none	1996	64679	0.0308601	1745.16	42.4481	5.90925	1.14373	1.71838e-09	4.29766e-06	Null_Model_OpenChrom	human
Enhancers_Hnisz2013	HCC1954	Enhancer	7525	64679	0.116344	7067.68	80.2191	5.70094	1.06471	5.95728e-09	1.48992e-05	Null_Model_OpenChrom	human
Roadmapepigenomics_ActiveChromatin	CD4_Naive_Primary	12_EnhBiv	645	64679	0.00997232	516.036	23.1197	5.57811	1.24991	1.21572e-08	3.04052e-05	Null_Model_OpenChrom	human
Roadmapepigenomics_ActiveChromatin	Brain_Dorsolateral_Prefrontal_Cortex	10_TssBiv	742	64679	0.011472	605.56	25.0838	5.43935	1.22531	2.67374e-08	6.68703e-05	Null_Model_OpenChrom	human
Roadmapepigenomics_ActiveChromatin	Brain_Angular_Gyrus	10_TssBiv	512	64679	0.00791602	402.162	20.1966	5.43844	1.27312	2.68745e-08	6.7213e-05	Null_Model_OpenChrom	human
SuperEnhancers_Hnisz2013	BI_Brain_Angular_Gyrus	SuperEnhancer	1886	64679	0.0291594	1668.83	40.163	5.40731	1.13014	3.19894e-08	8.00054e-05	Null_Model_OpenChrom	human
Roadmapepigenomics_ActiveChromatin	Fetal_Adrenal_Gland	7_Enh	10005	64679	0.154687	9520.1	90.7559	5.34291	1.05093	4.57339e-08	0.00011438	Null_Model_OpenChrom	human
Roadmapepigenomics_Histone_narrow	4star	H3K9me3	2992	64679	0.0462592	2730.72	48.9079	5.34236	1.09568	4.58712e-08	0.000114724	Null_Model_OpenChrom	human
Roadmapepigenomics_ActiveChromatin	CD3_Primary_Peripheral_UW	6_EnhG	1864	64679	0.0288192	1655.73	40.3108	5.16658	1.12579	1.19208e-07	0.000298139	Null_Model_OpenChrom	human
Roadmapepigenomics_ActiveChromatin	Brain_Anterior_Caudate	11_BivFlnk	348	64679	0.00538042	263.841	16.3484	5.14784	1.31898	1.31753e-07	0.000329515	Null_Model_OpenChrom	human
Roadmapepigenomics_ActiveChromatin	Esophagus	10_TssBiv	349	64679	0.00539588	264.141	16.4908	5.14584	1.32126	1.33162e-07	0.000333039	Null_Model_OpenChrom	human
Roadmapepigenomics_ActiveChromatin	Colon_Smooth_Muscle	12_EnhBiv	468	64679	0.00723573	371.269	18.8019	5.14475	1.26054	1.33938e-07	0.000334979	Null_Model_OpenChrom	human
Roadmapepigenomics_Histone_narrow	iPS-18_Cell_Line	H3K27me3	6586	64679	0.101826	6186.03	77.893	5.13492	1.06466	1.41133e-07	0.000352974	Null_Model_OpenChrom	human
Roadmapepigenomics_ActiveChromatin	CD34	6_EnhG	1837	64679	0.0284018	1636.64	39.2109	5.10987	1.12242	1.61193e-07	0.000403144	Null_Model_OpenChrom	human
Roadmapepigenomics_Histone_narrow	ES-WA7_Cell_Line	H3K4me1	6387	64679	0.0987492	6010.26	76.2055	4.94377	1.06268	3.8313e-07	0.000958209	Null_Model_OpenChrom	human
Roadmapepigenomics_ActiveChromatin	CD34_Primary	11_BivFlnk	644	64679	0.00995686	537.081	21.9281	4.8759	1.19907	5.41569e-07	0.00135447	Null_Model_OpenChrom	human
Roadmapepigenomics_ActiveChromatin	CD4+_CD25-_IL17-_PMA-Ionomycin_stimulated_MACS_purified_Th_Primary	12_EnhBiv	1401	64679	0.0216608	1223.34	36.5201	4.86473	1.14523	5.73077e-07	0.00143327	Null_Model_OpenChrom	human
Roadmapepigenomics_Histone_narrow	A549_EtOH_0.02pct_Lung_Carcinoma	H4K20me1	4608	64679	0.0712441	4285	66.9788	4.82239	1.07538	7.09236e-07	0.0017738	Null_Model_OpenChrom	human
Roadmapepigenomics_ActiveChromatin	CD19_Primary_Cord_BI	12_EnhBiv	798	64679	0.0123379	676.299	25.9342	4.6927	1.17995	1.34812e-06	0.00337165	Null_Model_OpenChrom	human
Roadmapepigenomics_Histone_narrow	H1_Cell_Line	H2BK15ac	2072	64679	0.0320351	1876.1	42.2545	4.63629	1.10442	1.77355e-06	0.00443565	Null_Model_OpenChrom	human
Roadmapepigenomics_ActiveChromatin	ES-I3	7_Enh	10575	64679	0.1635	10153.2	91.1361	4.62808	1.04154	1.84535e-06	0.00461521	Null_Model_OpenChrom	human
Roadmapepigenomics_Histone_narrow	iPS-20b_Cell_Line	H3K4me1	13036	64679	0.201549	12582	99.9879	4.54076	1.03609	2.80258e-06	0.00700925	Null_Model_OpenChrom	human
Roadmapepigenomics_ActiveChromatin	CD4+_CD25-_IL17+_PMA-Ionomcyin_stimulated_Th17_Primary	6_EnhG	993	64679	0.0153527	862.858	29.4048	4.42588	1.15083	4.80255e-06	0.0120112	Null_Model_OpenChrom	human
Roadmapepigenomics_ActiveChromatin	A549_EtOH_0.02pct_Lung_Carcinoma	7_Enh	7910	64679	0.122296	7573.39	80.7336	4.16938	1.04445	1.52713e-05	0.0381936	Null_Model_OpenChrom	human
Roadmapepigenomics_Histone_narrow	H1_Cell_Line	H2AK5ac	3123	64679	0.0482846	2906.83	52.6244	4.10779	1.07437	1.99733e-05	0.0499531	Null_Model_OpenChrom	human
Roadmapepigenomics_ActiveChromatin	CD4+_CD25+_CD127-_Treg_Primary	6_EnhG	1050	64679	0.016234	922.741	30.9884	4.10666	1.13791	2.00708e-05	0.050197	Null_Model_OpenChrom	human
Roadmapepigenomics_ActiveChromatin	Colon_Smooth_Muscle	7_Enh	9032	64679	0.139643	8689.99	86.0563	3.9743	1.03936	3.52928e-05	0.0882673	Null_Model_OpenChrom	human
Roadmapepigenomics_Histone_narrow	CD19_Primary_Cells_Peripheral_UW	H3K9me3	1354	64679	0.0209342	1219.85	34.6141	3.87559	1.10997	5.31838e-05	0.133013	Null_Model_OpenChrom	human
Roadmapepigenomics_ActiveChromatin	CD4+_CD25int_CD127+_Tmem_Primary	12_EnhBiv	680	64679	0.0105135	590.194	24.5518	3.65782	1.15216	0.000127184	0.318088	Null_Model_OpenChrom	human
Roadmapepigenomics_ActiveChromatin	CD4_Memory_Primary	12_EnhBiv	613	64679	0.00947757	530.648	22.7504	3.61978	1.15519	0.000147425	0.368709	Null_Model_OpenChrom	human
Roadmapepigenomics_Histone_narrow	H1_BMP4_Derived_Mesendoderm_Cultured_Cells	H2AK5ac	1553	64679	0.0240109	1418.53	37.4352	3.59211	1.0948	0.000164005	0.410177	Null_Model_OpenChrom	human
SuperEnhancers_Hnisz2013	HUVEC	SuperEnhancer	1955	64679	0.0302262	1803.81	42.3669	3.56849	1.08381	0.000179525	0.448993	Null_Model_OpenChrom	human
Roadmapepigenomics_ActiveChromatin	4star	11_BivFlnk	905	64679	0.0139922	806.825	27.6029	3.55669	1.12168	0.000187779	0.469635	Null_Model_OpenChrom	human
Roadmapepigenomics_ActiveChromatin	Brain_Anterior_Caudate	10_TssBiv	526	64679	0.00813247	451.609	21.1141	3.52327	1.16472	0.000213128	0.533033	Null_Model_OpenChrom	human
Roadmapepigenomics_ActiveChromatin	Fetal_Intestine_Small	6_EnhG	2725	64679	0.0421311	2560.23	50.6511	3.25308	1.06436	0.000570806	1	Null_Model_OpenChrom	human
Roadmapepigenomics_ActiveChromatin	Chondrocytes_from_Bone_Marrow_Derived_Mesenchymal_Stem_Cell	12_EnhBiv	566	64679	0.00875091	498.434	21.7867	3.10127	1.13556	0.000963458	1	Null_Model_OpenChrom	human
GeneSets_100000	HCC1954_AllelicExpression	AllelicExpression	30083	64679	0.465112	29718.6	125.467	2.90474	1.01226	0.0018378	1	Null_Model_OpenChrom	human
Roadmapepigenomics_Histone_narrow	H1_Derived_Neuronal_Progenitor_Cultured_Cells	H3K4me1	10324	64679	0.159619	10070.6	87.3689	2.90074	1.02517	0.00186141	1	Null_Model_OpenChrom	human
Roadmapepigenomics_Histone_narrow	Fetal_Muscle_Leg	H3K9me3	1557	64679	0.0240727	1445.11	38.5871	2.89965	1.07743	0.0018679	1	Null_Model_OpenChrom	human
Roadmapepigenomics_ActiveChromatin	Breast_vHMEC	7_Enh	12186	64679	0.188407	11911.1	95.2466	2.88652	1.02308	0.00194765	1	Null_Model_OpenChrom	human
Roadmapepigenomics_ActiveChromatin	Fetal_Adrenal_Gland	12_EnhBiv	3369	64679	0.052088	3213.02	56.9184	2.74038	1.04855	0.00306843	1	Null_Model_OpenChrom	human
Roadmapepigenomics_Histone_narrow	HUES64_Cell_Line	H3K27me3	6089	64679	0.0941418	5890.44	73.3009	2.70887	1.03371	0.00337565	1	Null_Model_OpenChrom	human
BroadChromHMM	HSMM	StrongEnhancer	6396	64679	0.0988884	6199.19	74.3325	2.64771	1.03175	0.00405192	1	Null_Model_OpenChrom	human
Roadmapepigenomics_ActiveChromatin	CD34_Primary	6_EnhG	536	64679	0.00828708	480.222	21.4445	2.60105	1.11615	0.00464695	1	Null_Model_OpenChrom	human
Roadmapepigenomics_ActiveChromatin	Fetal_Muscle_Leg	12_EnhBiv	1794	64679	0.027737	1691.74	41.4961	2.4643	1.06045	0.00686413	1	Null_Model_OpenChrom	human
Roadmapepigenomics_ActiveChromatin	CD4_Naive_Primary	6_EnhG	572	64679	0.00884367	518.936	23.5095	2.25712	1.10226	0.0120001	1	Null_Model_OpenChrom	human
Roadmapepigenomics_ActiveChromatin	Adipose_Nuclei	12_EnhBiv	1209	64679	0.0186923	1132.64	33.9743	2.2476	1.06742	0.0123008	1	Null_Model_OpenChrom	human
Roadmapepigenomics_Histone_narrow	GM12878_Lymphoblastoid	H4K20me1	742	64679	0.011472	683.299	26.2071	2.2399	1.08591	0.0125488	1	Null_Model_OpenChrom	human
Roadmapepigenomics_Histone_narrow	Fetal_Brain_Female	H3K27me3	5542	64679	0.0856847	5386.16	69.6459	2.23759	1.02893	0.0126238	1	Null_Model_OpenChrom	human
Roadmapepigenomics_Histone_narrow	Fetal_Stomach	H3K9me3	5483	64679	0.0847725	5335.22	70.616	2.09271	1.0277	0.0181873	1	Null_Model_OpenChrom	human
Roadmapepigenomics_Histone_narrow	NHEK-Epidermal_Keratinocytes	H4K20me1	2919	64679	0.0451306	2809.2	52.5896	2.08795	1.03909	0.0184014	1	Null_Model_OpenChrom	human
Roadmapepigenomics_ActiveChromatin	Duodenum_Mucosa	6_EnhG	1068	64679	0.0165123	1005.23	31.8048	1.97354	1.06244	0.0242168	1	Null_Model_OpenChrom	human
Roadmapepigenomics_ActiveChromatin	Brain_Inferior_Temporal_Lobe	12_EnhBiv	395	64679	0.00610708	360.485	18.3058	1.8855	1.09575	0.0296815	1	Null_Model_OpenChrom	human
Roadmapepigenomics_ActiveChromatin	CD14_Primary	6_EnhG	938	64679	0.0145024	883.371	29.9793	1.82224	1.06184	0.0342095	1	Null_Model_OpenChrom	human
Roadmapepigenomics_ActiveChromatin	CD4+_CD25int_CD127+_Tmem_Primary	6_EnhG	433	64679	0.0066946	397.412	19.6369	1.81233	1.08955	0.0349679	1	Null_Model_OpenChrom	human
Roadmapepigenomics_Histone_narrow	H1_BMP4_Derived_Trophoblast_Cultured_Cells	H3K23ac	482	64679	0.00745219	444.047	20.9944	1.80777	1.08547	0.0353215	1	Null_Model_OpenChrom	human
Roadmapepigenomics_ActiveChromatin	Duodenum_Smooth_Muscle	12_EnhBiv	684	64679	0.0105753	638.613	25.3293	1.79186	1.07107	0.0365775	1	Null_Model_OpenChrom	human
Roadmapepigenomics_ActiveChromatin	Duodenum_Mucosa	12_EnhBiv	670	64679	0.0103588	626.889	25.0922	1.7181	1.06877	0.042889	1	Null_Model_OpenChrom	human
Roadmapepigenomics_Histone_narrow	Fetal_Intestine_Small	H3K9me3	3678	64679	0.0568654	3581.82	56.2512	1.70977	1.02685	0.0436539	1	Null_Model_OpenChrom	human
Roadmapepigenomics_ActiveChromatin	Fetal_Muscle_Leg	7_Enh	6017	64679	0.0930286	5892.44	73.2427	1.70065	1.02114	0.0445041	1	Null_Model_OpenChrom	human
SuperEnhancers_Hnisz2013	NHDF-Ad	SuperEnhancer	1529	64679	0.0236398	1466.73	36.9155	1.68676	1.04245	0.0458245	1	Null_Model_OpenChrom	human
SuperEnhancers_Hnisz2013	Astrocytes	SuperEnhancer	1304	64679	0.0201611	1243.8	36.18	1.66403	1.0484	0.0480529	1	Null_Model_OpenChrom	human
Roadmapepigenomics_ActiveChromatin	CD4+_CD25-_IL17-_PMA-Ionomycin_stimulated_MACS_purified_Th_Primary	6_EnhG	1237	64679	0.0191252	1183.37	34.045	1.57525	1.04532	0.0575994	1	Null_Model_OpenChrom	human
Roadmapepigenomics_Histone_narrow	Stomach_Mucosa	H3K9me3	533	64679	0.0082407	499.956	21.1409	1.56303	1.06609	0.0590223	1	Null_Model_OpenChrom	human
Roadmapepigenomics_ActiveChromatin	CD8_Memory_Primary	6_EnhG	460	64679	0.00711205	428.127	20.9647	1.52032	1.07445	0.0642149	1	Null_Model_OpenChrom	human
SuperEnhancers_Hnisz2013	panc1	SuperEnhancer	1343	64679	0.0207641	1287.37	36.92	1.5067	1.04321	0.065944	1	Null_Model_OpenChrom	human
Roadmapepigenomics_ActiveChromatin	Colonic_Mucosa	12_EnhBiv	643	64679	0.0099414	606.462	24.5453	1.48861	1.06025	0.0682944	1	Null_Model_OpenChrom	human
Roadmapepigenomics_ActiveChromatin	Brain_Substantia_Nigra	12_EnhBiv	350	64679	0.00541134	323.86	17.5972	1.48545	1.08071	0.0687119	1	Null_Model_OpenChrom	human
SuperEnhancers_Hnisz2013	BI_Stomach_Smooth_Muscle	SuperEnhancer	1956	64679	0.0302417	1896.19	42.3791	1.41136	1.03154	0.079069	1	Null_Model_OpenChrom	human
SuperEnhancers_Hnisz2013	H2171	SuperEnhancer	995	64679	0.0153837	958.927	30.5933	1.17911	1.03762	0.119177	1	Null_Model_OpenChrom	human
Roadmapepigenomics_Histone_narrow	HSMM_Skeletal_Muscle_Myoblasts	H4K20me1	1780	64679	0.0275205	1731.98	41.3349	1.16163	1.02772	0.122692	1	Null_Model_OpenChrom	human
Roadmapepigenomics_Histone_narrow	H1_BMP4_Derived_Mesendoderm_Cultured_Cells	H3K79me1	3276	64679	0.0506501	3213.11	54.7059	1.14955	1.01957	0.125165	1	Null_Model_OpenChrom	human
Roadmapepigenomics_Histone_narrow	NHDF-Ad_Adult_Dermal_Fibroblasts	H4K20me1	4537	64679	0.0701464	4477.89	66.5217	0.88858	1.0132	0.187114	1	Null_Model_OpenChrom	human
Roadmapepigenomics_Histone_narrow	Fetal_Muscle_Trunk	H3K9me3	966	64679	0.0149353	938.993	31.4197	0.859557	1.02876	0.195017	1	Null_Model_OpenChrom	human
Enhancers_Hnisz2013	Skeletal_Muscle_Myoblast	Enhancer	5373	64679	0.0830718	5315.3	67.7106	0.852102	1.01085	0.197079	1	Null_Model_OpenChrom	human
Misc_Histone	NeutrophilCells	H3K36me3	9029	64679	0.139597	8957.82	88.5905	0.803437	1.00795	0.210861	1	Null_Model_OpenChrom	human
Roadmapepigenomics_Histone_narrow	iPS-20b_Cell_Line	H3K27me3	7119	64679	0.110067	7054.97	80.6499	0.793974	1.00908	0.213605	1	Null_Model_OpenChrom	human
Roadmapepigenomics_ActiveChromatin	Fetal_Heart	12_EnhBiv	858	64679	0.0132655	835.998	28.7647	0.764897	1.02632	0.222167	1	Null_Model_OpenChrom	human
Roadmapepigenomics_Histone_narrow	Breast_Myoepithelial_Cells	H3K9me3	3165	64679	0.048934	3122.32	56.1497	0.760099	1.01367	0.223598	1	Null_Model_OpenChrom	human
Roadmapepigenomics_Histone_narrow	Fetal_Brain_Female	H3K9me3	1293	64679	0.019991	1266.44	36.151	0.734763	1.02097	0.231242	1	Null_Model_OpenChrom	human
GeneSets_100000	K562_AllelicExpression	AllelicExpression	41198	64679	0.636961	41138.7	121.633	0.487934	1.00144	0.312798	1	Null_Model_OpenChrom	human
Roadmapepigenomics_Histone_narrow	HUES64_Cell_Line	H3K4me1	13007	64679	0.201101	12965.5	103.362	0.401622	1.0032	0.343981	1	Null_Model_OpenChrom	human
Roadmapepigenomics_ActiveChromatin	CD15_Primary	6_EnhG	712	64679	0.0110082	703.496	26.2207	0.324343	1.01209	0.372839	1	Null_Model_OpenChrom	human
Roadmapepigenomics_ActiveChromatin	4star	7_Enh	10532	64679	0.162835	10516.2	91.0646	0.173067	1.0015	0.4313	1	Null_Model_OpenChrom	human
Roadmapepigenomics_Histone_narrow	Aorta	H3K27me3	2106	64679	0.0325608	2099.52	43.565	0.148664	1.00308	0.44091	1	Null_Model_OpenChrom	human
Roadmapepigenomics_Histone_narrow	Neurosphere_Cultured_Cells_Cortex_Derived	H3K9me3	2158	64679	0.0333648	2157.4	45.9358	0.0130921	1.00028	0.494777	1	Null_Model_OpenChrom	human
Roadmapepigenomics_ActiveChromatin	Fetal_Lung	12_EnhBiv	1268	64679	0.0196045	1267.91	35.0096	0.00248255	1.00007	0.49901	1	Null_Model_OpenChrom	human
Roadmapepigenomics_Histone_narrow	H1_Derived_Mesenchymal_Stem_Cells	H2AK5ac	5767	64679	0.0891634	5766.88	70.5896	0.00172657	1.00002	0.499311	1	Null_Model_OpenChrom	human
eQTLs	Brain_Cortex	none	9	64679	0.000139149	8.52547	3.01191	0	1.05566	0.5	1	Null_Model_OpenChrom	human
eQTLs	Dendritic_cells	none	26	64679	0.000401985	9.98801	3.13909	0	2.60312	0.5	1	Null_Model_OpenChrom	human
eQTLs	Fibroblasts	none	14	64679	0.000216454	9.27173	3.2156	0	1.50997	0.5	1	Null_Model_OpenChrom	human
eQTLs	Liver	none	145	64679	0.00224184	83.5215	9.1939	0	1.73608	0.5	1	Null_Model_OpenChrom	human
eQTLs	T-cells	none	13	64679	0.000200993	10.2677	3.19128	0	1.2661	0.5	1	Null_Model_OpenChrom	human
FANTOM5_enhancer_cell	acinar_cell	Enhancer	278	64679	0.00429815	115.215	12.0894	0	2.41288	0.5	1	Null_Model_OpenChrom	human
FANTOM5_enhancer_cell	amniotic_epithelial_cell	Enhancer	309	64679	0.00477744	115.114	12.3254	0	2.6843	0.5	1	Null_Model_OpenChrom	human
FANTOM5_enhancer_cell	bronchial_smooth_muscle_cell	Enhancer	197	64679	0.00304581	62.3936	9.07011	0	3.15737	0.5	1	Null_Model_OpenChrom	human
FANTOM5_enhancer_cell	cardiac_myocyte	Enhancer	210	64679	0.0032468	79.9121	10.1062	0	2.62789	0.5	1	Null_Model_OpenChrom	human
FANTOM5_enhancer_cell	chondrocyte	Enhancer	284	64679	0.00439092	114.006	12.1737	0	2.4911	0.5	1	Null_Model_OpenChrom	human
FANTOM5_enhancer_cell	corneal_epithelial_cell	Enhancer	204	64679	0.00315404	68.1878	9.37874	0	2.99174	0.5	1	Null_Model_OpenChrom	human
FANTOM5_enhancer_cell	endothelial_cell_of_hepatic_sinusoid	Enhancer	284	64679	0.00439092	103.264	11.7239	0	2.75024	0.5	1	Null_Model_OpenChrom	human
FANTOM5_enhancer_cell	endothelial_cell_of_lymphatic_vessel	Enhancer	280	64679	0.00432907	103.463	11.4516	0	2.70629	0.5	1	Null_Model_OpenChrom	human
FANTOM5_enhancer_cell	epithelial_cell_of_esophagus	Enhancer	166	64679	0.00256652	59.7403	8.4539	0	2.7787	0.5	1	Null_Model_OpenChrom	human
FANTOM5_enhancer_cell	epithelial_cell_of_Malassez	Enhancer	260	64679	0.00401985	125.848	11.3755	0	2.06598	0.5	1	Null_Model_OpenChrom	human
FANTOM5_enhancer_cell	fibroblast_of_choroid_plexus	Enhancer	307	64679	0.00474652	105.777	12.1148	0	2.90233	0.5	1	Null_Model_OpenChrom	human
FANTOM5_enhancer_cell	fibroblast_of_lymphatic_vessel	Enhancer	279	64679	0.00431361	114.816	12.2212	0	2.42997	0.5	1	Null_Model_OpenChrom	human
FANTOM5_enhancer_cell	fibroblast_of_pulmonary_artery	Enhancer	140	64679	0.00216454	60.0549	8.09617	0	2.3312	0.5	1	Null_Model_OpenChrom	human
FANTOM5_enhancer_cell	fibroblast_of_the_conjuctiva	Enhancer	188	64679	0.00290666	50.2258	8.06281	0	3.7431	0.5	1	Null_Model_OpenChrom	human
FANTOM5_enhancer_cell	fibroblast_of_tunica_adventitia_of_artery	Enhancer	268	64679	0.00414354	117.673	11.7804	0	2.27749	0.5	1	Null_Model_OpenChrom	human
FANTOM5_enhancer_cell	hepatic_stellate_cell	Enhancer	269	64679	0.004159	92.0549	10.988	0	2.92217	0.5	1	Null_Model_OpenChrom	human
FANTOM5_enhancer_cell	hepatocyte	Enhancer	137	64679	0.00211815	55.1179	7.48011	0	2.48558	0.5	1	Null_Model_OpenChrom	human
FANTOM5_enhancer_cell	iris_pigment_epithelial_cell	Enhancer	111	64679	0.00171617	48.4755	7.21981	0	2.28982	0.5	1	Null_Model_OpenChrom	human
FANTOM5_enhancer_cell	keratocyte	Enhancer	155	64679	0.00239645	40.1708	7.30711	0	3.85852	0.5	1	Null_Model_OpenChrom	human
FANTOM5_enhancer_cell	lens_epithelial_cell	Enhancer	321	64679	0.00496297	120.402	12.6738	0	2.66608	0.5	1	Null_Model_OpenChrom	human
FANTOM5_enhancer_cell	mesothelial_cell	Enhancer	217	64679	0.00335503	112.365	11.392	0	1.93121	0.5	1	Null_Model_OpenChrom	human
FANTOM5_enhancer_cell	neuronal_stem_cell	Enhancer	83	64679	0.00128326	39.0519	6.25326	0	2.12537	0.5	1	Null_Model_OpenChrom	human
FANTOM5_enhancer_cell	neuron	Enhancer	285	64679	0.00440638	84.1269	11.1883	0	3.38774	0.5	1	Null_Model_OpenChrom	human
FANTOM5_enhancer_cell	reticulocyte	Enhancer	281	64679	0.00434453	71.5874	10.7768	0	3.92527	0.5	1	Null_Model_OpenChrom	human
FANTOM5_enhancer_cell	retinal_pigment_epithelial_cell	Enhancer	295	64679	0.00456099	108.519	11.8886	0	2.71841	0.5	1	Null_Model_OpenChrom	human
FANTOM5_enhancer_cell	smooth_muscle_cell_of_the_esophagus	Enhancer	146	64679	0.0022573	40.8901	7.15373	0	3.57055	0.5	1	Null_Model_OpenChrom	human
FANTOM5_enhancer_cell	smooth_muscle_cell_of_trachea	Enhancer	126	64679	0.00194808	36.1818	6.54927	0	3.48241	0.5	1	Null_Model_OpenChrom	human
FANTOM5_enhancer_cell	tendon_cell	Enhancer	261	64679	0.00403531	99.6184	11.1182	0	2.62	0.5	1	Null_Model_OpenChrom	human
FANTOM5_enhancer_cell	trabecular_meshwork_cell	Enhancer	291	64679	0.00449914	88.1369	11.3357	0	3.30168	0.5	1	Null_Model_OpenChrom	human
FANTOM5_enhancer_cell	uterine_smooth_muscle_cell	Enhancer	208	64679	0.00321588	78.5415	9.42712	0	2.64828	0.5	1	Null_Model_OpenChrom	human
FANTOM5_enhancer_organ	esophagus_expressed_enhancers	Enhancer	291	64679	0.00449914	83.7463	11.3142	0	3.47478	0.5	1	Null_Model_OpenChrom	human
FANTOM5_enhancer_organ	eye_expressed_enhancers	Enhancer	312	64679	0.00482382	100.825	11.7838	0	3.09447	0.5	1	Null_Model_OpenChrom	human
FANTOM5_enhancer_organ	female_gonad_expressed_enhancers	Enhancer	252	64679	0.00389616	75.7982	10.1459	0	3.32462	0.5	1	Null_Model_OpenChrom	human
FANTOM5_enhancer_organ	gallbladder_expressed_enhancers	Enhancer	223	64679	0.0034478	70.4865	9.88616	0	3.16373	0.5	1	Null_Model_OpenChrom	human
FANTOM5_enhancer_organ	internal_male_genitalia_expressed_enhancers	Enhancer	236	64679	0.00364879	78.0789	10.242	0	3.02258	0.5	1	Null_Model_OpenChrom	human
FANTOM5_enhancer_organ	liver_expressed_enhancers	Enhancer	199	64679	0.00307673	79.3566	9.51681	0	2.50767	0.5	1	Null_Model_OpenChrom	human
FANTOM5_enhancer_organ	lymph_node_expressed_enhancers	Enhancer	137	64679	0.00211815	28.8811	6.28131	0	4.74358	0.5	1	Null_Model_OpenChrom	human
FANTOM5_enhancer_organ	olfactory_region_expressed_enhancers	Enhancer	120	64679	0.00185532	30.8661	6.22672	0	3.88776	0.5	1	Null_Model_OpenChrom	human
FANTOM5_enhancer_organ	pancreas_expressed_enhancers	Enhancer	86	64679	0.00132964	22.4336	5.09194	0	3.83354	0.5	1	Null_Model_OpenChrom	human
FANTOM5_enhancer_organ	parotid_gland_expressed_enhancers	Enhancer	48	64679	0.000742127	16.1948	4.15728	0	2.96391	0.5	1	Null_Model_OpenChrom	human
FANTOM5_enhancer_organ	penis_expressed_enhancers	Enhancer	45	64679	0.000695744	14.1958	3.84859	0	3.16995	0.5	1	Null_Model_OpenChrom	human
FANTOM5_enhancer_organ	placenta_expressed_enhancers	Enhancer	166	64679	0.00256652	67.8561	8.57912	0	2.44635	0.5	1	Null_Model_OpenChrom	human
FANTOM5_enhancer_organ	prostate_gland_expressed_enhancers	Enhancer	246	64679	0.0038034	71.9261	10.2815	0	3.42018	0.5	1	Null_Model_OpenChrom	human
FANTOM5_enhancer_organ	salivary_gland_expressed_enhancers	Enhancer	122	64679	0.00188624	35.7233	6.60593	0	3.41514	0.5	1	Null_Model_OpenChrom	human
FANTOM5_enhancer_organ	skeletal_muscle_tissue_expressed_enhancers	Enhancer	217	64679	0.00335503	69.046	9.57444	0	3.14283	0.5	1	Null_Model_OpenChrom	human
FANTOM5_enhancer_organ	skin_of_body_expressed_enhancers	Enhancer	59	64679	0.000912197	16.4136	4.29311	0	3.59458	0.5	1	Null_Model_OpenChrom	human
FANTOM5_enhancer_organ	small_intestine_expressed_enhancers	Enhancer	258	64679	0.00398893	80.7972	10.5465	0	3.19318	0.5	1	Null_Model_OpenChrom	human
FANTOM5_enhancer_organ	smooth_muscle_tissue_expressed_enhancers	Enhancer	96	64679	0.00148425	26.6883	5.47273	0	3.59708	0.5	1	Null_Model_OpenChrom	human
FANTOM5_enhancer_organ	spinal_cord_expressed_enhancers	Enhancer	311	64679	0.00480836	99.8472	12.111	0	3.11476	0.5	1	Null_Model_OpenChrom	human
FANTOM5_enhancer_organ	stomach_expressed_enhancers	Enhancer	38	64679	0.000587517	9.46553	3.24639	0	4.01456	0.5	1	Null_Model_OpenChrom	human
FANTOM5_enhancer_organ	submandibular_gland_expressed_enhancers	Enhancer	65	64679	0.00100496	15.7223	4.17095	0	4.13426	0.5	1	Null_Model_OpenChrom	human
FANTOM5_enhancer_organ	throat_expressed_enhancers	Enhancer	244	64679	0.00377248	75.2747	10.2232	0	3.24146	0.5	1	Null_Model_OpenChrom	human
FANTOM5_enhancer_organ	thyroid_gland_expressed_enhancers	Enhancer	260	64679	0.00401985	75.5385	10.336	0	3.44196	0.5	1	Null_Model_OpenChrom	human
FANTOM5_enhancer_organ	tongue_expressed_enhancers	Enhancer	194	64679	0.00299943	70.1159	9.16464	0	2.76685	0.5	1	Null_Model_OpenChrom	human
FANTOM5_enhancer_organ	umbilical_cord_expressed_enhancers	Enhancer	39	64679	0.000602978	9.38761	3.17421	0	4.15441	0.5	1	Null_Model_OpenChrom	human
FANTOM5_enhancer_organ	urinary_bladder_expressed_enhancers	Enhancer	282	64679	0.00435999	65.2368	10.8478	0	4.32272	0.5	1	Null_Model_OpenChrom	human
FANTOM5_enhancer_organ	uterus_expressed_enhancers	Enhancer	291	64679	0.00449914	89.8721	11.6275	0	3.23793	0.5	1	Null_Model_OpenChrom	human
FANTOM5_enhancer_organ	vagina_expressed_enhancers	Enhancer	186	64679	0.00287574	54.4366	8.54577	0	3.41682	0.5	1	Null_Model_OpenChrom	human
Roadmapepigenomics_ActiveChromatin	4star	3_TxFlnk	75	64679	0.00115957	76.4955	9.04855	0	0.98045	0.5	1	Null_Model_OpenChrom	human
Roadmapepigenomics_ActiveChromatin	A549_EtOH_0.02pct_Lung_Carcinoma	11_BivFlnk	316	64679	0.00488567	202.084	14.5724	0	1.56371	0.5	1	Null_Model_OpenChrom	human
Roadmapepigenomics_ActiveChromatin	A549_EtOH_0.02pct_Lung_Carcinoma	12_EnhBiv	184	64679	0.00284482	178.196	13.7412	0	1.03257	0.5	1	Null_Model_OpenChrom	human
Roadmapepigenomics_ActiveChromatin	Adipose_Derived_Mesenchymal_Stem_Cell	3_TxFlnk	208	64679	0.00321588	325.127	18.0262	0	0.63975	0.5	1	Null_Model_OpenChrom	human
Roadmapepigenomics_ActiveChromatin	Adipose_Nuclei	3_TxFlnk	140	64679	0.00216454	154.928	12.2217	0	0.903645	0.5	1	Null_Model_OpenChrom	human
Roadmapepigenomics_ActiveChromatin	Adult_Liver	10_TssBiv	119	64679	0.00183986	45.7902	7.31163	0	2.59881	0.5	1	Null_Model_OpenChrom	human
Roadmapepigenomics_ActiveChromatin	Adult_Liver	3_TxFlnk	61	64679	0.000943119	95.0739	9.67474	0	0.641606	0.5	1	Null_Model_OpenChrom	human
Roadmapepigenomics_ActiveChromatin	Aorta	11_BivFlnk	74	64679	0.00114411	22.006	4.87791	0	3.36272	0.5	1	Null_Model_OpenChrom	human
Roadmapepigenomics_ActiveChromatin	Aorta	12_EnhBiv	51	64679	0.000788509	40.5325	6.2807	0	1.25825	0.5	1	Null_Model_OpenChrom	human
Roadmapepigenomics_ActiveChromatin	Aorta	3_TxFlnk	30	64679	0.000463829	39.0799	6.11683	0	0.767658	0.5	1	Null_Model_OpenChrom	human
Roadmapepigenomics_ActiveChromatin	Aorta	6_EnhG	168	64679	0.00259744	238.198	15.7764	0	0.705296	0.5	1	Null_Model_OpenChrom	human
Roadmapepigenomics_ActiveChromatin	Bone_Marrow_Derived_Mesenchymal_Stem_Cell	12_EnhBiv	311	64679	0.00480836	225.972	15.2996	0	1.37628	0.5	1	Null_Model_OpenChrom	human
Roadmapepigenomics_ActiveChromatin	Bone_Marrow_Derived_Mesenchymal_Stem_Cell	3_TxFlnk	284	64679	0.00439092	328.487	18.354	0	0.864571	0.5	1	Null_Model_OpenChrom	human
Roadmapepigenomics_ActiveChromatin	Brain_Angular_Gyrus	11_BivFlnk	224	64679	0.00346326	164.929	12.8552	0	1.35816	0.5	1	Null_Model_OpenChrom	human
Roadmapepigenomics_ActiveChromatin	Brain_Angular_Gyrus	12_EnhBiv	236	64679	0.00364879	220.971	15.5044	0	1.06801	0.5	1	Null_Model_OpenChrom	human
Roadmapepigenomics_ActiveChromatin	Brain_Angular_Gyrus	3_TxFlnk	37	64679	0.000572056	58.1109	7.57949	0	0.636714	0.5	1	Null_Model_OpenChrom	human
Roadmapepigenomics_ActiveChromatin	Brain_Anterior_Caudate	12_EnhBiv	214	64679	0.00330865	259.154	16.0234	0	0.825764	0.5	1	Null_Model_OpenChrom	human
Roadmapepigenomics_ActiveChromatin	Brain_Anterior_Caudate	3_TxFlnk	125	64679	0.00193262	117.825	10.9105	0	1.06089	0.5	1	Null_Model_OpenChrom	human
Roadmapepigenomics_ActiveChromatin	Brain_Cingulate_Gyrus	3_TxFlnk	90	64679	0.00139149	98.955	10.0422	0	0.909504	0.5	1	Null_Model_OpenChrom	human
Roadmapepigenomics_ActiveChromatin	Brain_Dorsolateral_Prefrontal_Cortex	3_TxFlnk	110	64679	0.00170071	109.178	10.0274	0	1.00753	0.5	1	Null_Model_OpenChrom	human
Roadmapepigenomics_ActiveChromatin	Brain_Germinal_Matrix	3_TxFlnk	137	64679	0.00211815	167.984	13.0356	0	0.815554	0.5	1	Null_Model_OpenChrom	human
Roadmapepigenomics_ActiveChromatin	Brain_Hippocampus_Middle	3_TxFlnk	120	64679	0.00185532	128.973	11.5325	0	0.930427	0.5	1	Null_Model_OpenChrom	human
Roadmapepigenomics_ActiveChromatin	Brain_Inferior_Temporal_Lobe	3_TxFlnk	103	64679	0.00159248	115.314	10.4573	0	0.893216	0.5	1	Null_Model_OpenChrom	human
Roadmapepigenomics_ActiveChromatin	Brain_Substantia_Nigra	11_BivFlnk	288	64679	0.00445276	208.743	14.7334	0	1.37969	0.5	1	Null_Model_OpenChrom	human
Roadmapepigenomics_ActiveChromatin	Brain_Substantia_Nigra	3_TxFlnk	59	64679	0.000912197	73.7403	8.48731	0	0.800106	0.5	1	Null_Model_OpenChrom	human
Roadmapepigenomics_ActiveChromatin	Breast_Myoepithelial	3_TxFlnk	198	64679	0.00306127	301.793	18.2299	0	0.656078	0.5	1	Null_Model_OpenChrom	human
Roadmapepigenomics_ActiveChromatin	Breast_vHMEC	11_BivFlnk	250	64679	0.00386524	98.5315	10.8565	0	2.53726	0.5	1	Null_Model_OpenChrom	human
Roadmapepigenomics_ActiveChromatin	Breast_vHMEC	3_TxFlnk	25	64679	0.000386524	80.2967	9.36904	0	0.311345	0.5	1	Null_Model_OpenChrom	human
Roadmapepigenomics_ActiveChromatin	CD14_Primary	3_TxFlnk	121	64679	0.00187078	86.3207	9.32663	0	1.40175	0.5	1	Null_Model_OpenChrom	human
Roadmapepigenomics_ActiveChromatin	CD15_Primary	3_TxFlnk	207	64679	0.00320042	179.308	13.491	0	1.15444	0.5	1	Null_Model_OpenChrom	human
Roadmapepigenomics_ActiveChromatin	CD19_Primary_Cord_BI	10_TssBiv	270	64679	0.00417446	189.538	14.1775	0	1.42451	0.5	1	Null_Model_OpenChrom	human
Roadmapepigenomics_ActiveChromatin	CD19_Primary_Cord_BI	3_TxFlnk	277	64679	0.00428269	165.321	13.3609	0	1.67553	0.5	1	Null_Model_OpenChrom	human
Roadmapepigenomics_ActiveChromatin	CD34	10_TssBiv	234	64679	0.00361787	119.226	11.0882	0	1.96266	0.5	1	Null_Model_OpenChrom	human
Roadmapepigenomics_ActiveChromatin	CD34_Primary	10_TssBiv	218	64679	0.00337049	181.844	13.1554	0	1.19883	0.5	1	Null_Model_OpenChrom	human
Roadmapepigenomics_ActiveChromatin	CD34_Primary	3_TxFlnk	50	64679	0.000773048	53.1449	6.923	0	0.940825	0.5	1	Null_Model_OpenChrom	human
Roadmapepigenomics_ActiveChromatin	CD3_Primary_Cord_BI	3_TxFlnk	237	64679	0.00366425	207.958	14.0052	0	1.13965	0.5	1	Null_Model_OpenChrom	human
Roadmapepigenomics_ActiveChromatin	CD4+_CD25-_CD45RO+_Memory_Primary	10_TssBiv	168	64679	0.00259744	51.961	8.14085	0	3.23319	0.5	1	Null_Model_OpenChrom	human
Roadmapepigenomics_ActiveChromatin	CD4+_CD25-_CD45RO+_Memory_Primary	3_TxFlnk	83	64679	0.00128326	72.5485	8.58696	0	1.14406	0.5	1	Null_Model_OpenChrom	human
Roadmapepigenomics_ActiveChromatin	CD4+_CD25-_IL17+_PMA-Ionomcyin_stimulated_Th17_Primary	10_TssBiv	290	64679	0.00448368	133.932	12.6505	0	2.16528	0.5	1	Null_Model_OpenChrom	human
Roadmapepigenomics_ActiveChromatin	CD4+_CD25int_CD127+_Tmem_Primary	3_TxFlnk	209	64679	0.00323134	104.626	10.7528	0	1.99758	0.5	1	Null_Model_OpenChrom	human
Roadmapepigenomics_ActiveChromatin	CD4+_CD25-_Th_Primary	10_TssBiv	298	64679	0.00460737	136.492	13.0053	0	2.18329	0.5	1	Null_Model_OpenChrom	human
Roadmapepigenomics_ActiveChromatin	CD4+_CD25-_Th_Primary	3_TxFlnk	173	64679	0.00267475	125.374	12.0242	0	1.37988	0.5	1	Null_Model_OpenChrom	human
Roadmapepigenomics_ActiveChromatin	CD4_Memory_Primary	10_TssBiv	159	64679	0.00245829	59.9271	8.65666	0	2.65322	0.5	1	Null_Model_OpenChrom	human
Roadmapepigenomics_ActiveChromatin	CD4_Memory_Primary	3_TxFlnk	71	64679	0.00109773	68.5664	8.60673	0	1.03549	0.5	1	Null_Model_OpenChrom	human
Roadmapepigenomics_ActiveChromatin	CD4_Naive_Primary	10_TssBiv	242	64679	0.00374155	98.4196	11.3342	0	2.45886	0.5	1	Null_Model_OpenChrom	human
Roadmapepigenomics_ActiveChromatin	CD4_Naive_Primary	3_TxFlnk	191	64679	0.00295305	124.689	11.644	0	1.53181	0.5	1	Null_Model_OpenChrom	human
Roadmapepigenomics_ActiveChromatin	CD56_Primary	10_TssBiv	276	64679	0.00426723	78.7792	10.546	0	3.50346	0.5	1	Null_Model_OpenChrom	human
Roadmapepigenomics_ActiveChromatin	CD56_Primary	3_TxFlnk	262	64679	0.00405077	137.419	12.3252	0	1.90658	0.5	1	Null_Model_OpenChrom	human
Roadmapepigenomics_ActiveChromatin	CD8_Memory_Primary	10_TssBiv	309	64679	0.00477744	114.818	12.1306	0	2.69121	0.5	1	Null_Model_OpenChrom	human
Roadmapepigenomics_ActiveChromatin	CD8_Memory_Primary	3_TxFlnk	138	64679	0.00213361	99.8931	9.91623	0	1.38148	0.5	1	Null_Model_OpenChrom	human
Roadmapepigenomics_ActiveChromatin	CD8_Naive_Primary	10_TssBiv	300	64679	0.00463829	123.103	12.8109	0	2.43699	0.5	1	Null_Model_OpenChrom	human
Roadmapepigenomics_ActiveChromatin	CD8_Naive_Primary	3_TxFlnk	70	64679	0.00108227	50.5345	7.01107	0	1.38519	0.5	1	Null_Model_OpenChrom	human
Roadmapepigenomics_ActiveChromatin	Chondrocytes_from_Bone_Marrow_Derived_Mesenchymal_Stem_Cell	3_TxFlnk	197	64679	0.00304581	265.491	16.6547	0	0.742023	0.5	1	Null_Model_OpenChrom	human
Roadmapepigenomics_ActiveChromatin	Colon_Smooth_Muscle	3_TxFlnk	116	64679	0.00179347	115.82	10.624	0	1.00155	0.5	1	Null_Model_OpenChrom	human
Roadmapepigenomics_ActiveChromatin	Duodenum_Mucosa	3_TxFlnk	298	64679	0.00460737	227.24	15.4659	0	1.31139	0.5	1	Null_Model_OpenChrom	human
Roadmapepigenomics_ActiveChromatin	ES-I3	3_TxFlnk	112	64679	0.00173163	110.018	10.5473	0	1.01802	0.5	1	Null_Model_OpenChrom	human
Roadmapepigenomics_ActiveChromatin	ES-I3	6_EnhG	246	64679	0.0038034	268.679	16.6514	0	0.91559	0.5	1	Null_Model_OpenChrom	human
Roadmapepigenomics_ActiveChromatin	Esophagus	3_TxFlnk	150	64679	0.00231915	127.874	11.4049	0	1.17303	0.5	1	Null_Model_OpenChrom	human
Roadmapepigenomics_ActiveChromatin	ES-WA7	11_BivFlnk	124	64679	0.00191716	100.064	10.0271	0	1.23921	0.5	1	Null_Model_OpenChrom	human
Roadmapepigenomics_ActiveChromatin	ES-WA7	3_TxFlnk	0	64679	0	0.263736	0.512224	0	0	0.5	1	Null_Model_OpenChrom	human
Roadmapepigenomics_ActiveChromatin	ES-WA7	6_EnhG	9	64679	0.000139149	4.95205	2.19766	0	1.81743	0.5	1	Null_Model_OpenChrom	human
Roadmapepigenomics_ActiveChromatin	Fetal_Adrenal_Gland	3_TxFlnk	181	64679	0.00279844	178.771	13.3961	0	1.01247	0.5	1	Null_Model_OpenChrom	human
Roadmapepigenomics_ActiveChromatin	Fetal_Brain_Female	12_EnhBiv	320	64679	0.00494751	485.446	22.6142	0	0.659188	0.5	1	Null_Model_OpenChrom	human
Roadmapepigenomics_ActiveChromatin	Fetal_Brain_Female	3_TxFlnk	131	64679	0.00202539	183.345	13.7395	0	0.714501	0.5	1	Null_Model_OpenChrom	human
Roadmapepigenomics_ActiveChromatin	Fetal_Brain_Male	3_TxFlnk	14	64679	0.000216454	28.4286	5.27723	0	0.492462	0.5	1	Null_Model_OpenChrom	human
[truncated: 452 more rows]

## Sheet: EBNA2- ATAC Non TF RELI
Track	Cell	Label	Overlap	Total	Ratio	Mean	STD	Z-score	Enrichment	P-val	Corrected P-val	Null_Model	Species
DNaseClusters	GM06990	Dnase	22908	35894	0.638213	3293.55	622.924	31.4877	6.95542	6.40231e-218	1.60122e-214	Null_Model_OpenChrom	human
DNaseClusters	CD20+	Dnase	23727	35894	0.66103	3721.24	635.693	31.4708	6.37609	1.09019e-217	2.72657e-214	Null_Model_OpenChrom	human
DNaseClusters	CLL	Dnase	22225	35894	0.619184	3506.38	594.802	31.4703	6.33844	1.10624e-217	2.7667e-214	Null_Model_OpenChrom	human
DNaseClusters	GM12864	Dnase	24403	35894	0.679863	4513.39	632.226	31.4596	5.4068	1.54909e-217	3.87428e-214	Null_Model_OpenChrom	human
DNaseClusters	GM18507	Dnase	23691	35894	0.660027	4165.45	620.727	31.4559	5.6875	1.74204e-217	4.35685e-214	Null_Model_OpenChrom	human
DNaseI_Duke	GC_B_cell	Dnase	26393	35894	0.735304	5340.79	669.601	31.4399	4.94178	2.88265e-217	7.2095e-214	Null_Model_OpenChrom	human
DNaseI_Duke	Naive_B_cell	Dnase	24887	35894	0.693347	4963.55	633.732	31.4383	5.01395	3.03322e-217	7.58608e-214	Null_Model_OpenChrom	human
DNaseClusters	GM12865	Dnase	24696	35894	0.688026	4706.5	635.866	31.4367	5.24721	3.19295e-217	7.98557e-214	Null_Model_OpenChrom	human
DNaseClusters	GM19239	Dnase	23736	35894	0.66128	4720.37	604.91	31.4355	5.02842	3.31471e-217	8.29009e-214	Null_Model_OpenChrom	human
DNaseClusters	Th2	Dnase	19383	35894	0.540007	3243.95	513.415	31.4347	5.97512	3.39825e-217	8.49903e-214	Null_Model_OpenChrom	human
Roadmapepigenomics_ActiveChromatin	CD3_Primary_Cord_BI	1_TssA	13111	35894	0.36527	1767.65	360.976	31.4241	7.41719	4.73436e-217	1.18406e-213	Null_Model_OpenChrom	human
DNaseClusters	GM12878	Dnase	25146	35894	0.700563	5840.19	614.441	31.4201	4.30568	5.37579e-217	1.34449e-213	Null_Model_OpenChrom	human
Roadmapepigenomics_ActiveChromatin	CD19_Primary_Peripheral_UW	1_TssA	11657	35894	0.324762	1283.17	330.173	31.4194	9.08455	5.4972e-217	1.37485e-213	Null_Model_OpenChrom	human
Roadmapepigenomics_ActiveChromatin	CD4+_CD25-_Th_Primary	1_TssA	11312	35894	0.31515	1261.36	319.891	31.4189	8.96809	5.57742e-217	1.39491e-213	Null_Model_OpenChrom	human
Roadmapepigenomics_ActiveChromatin	CD4_Memory_Primary	1_TssA	12891	35894	0.359141	1684.04	356.7	31.4184	7.65482	5.66662e-217	1.41722e-213	Null_Model_OpenChrom	human
Roadmapepigenomics_Histone_narrow	CD19_Primary_Cells_Peripheral_UW	H3K4me3	17418	35894	0.485262	2905.72	461.91	31.418	5.99439	5.75341e-217	1.43893e-213	Null_Model_OpenChrom	human
Roadmapepigenomics_ActiveChromatin	CD15_Primary	1_TssA	9888	35894	0.275478	1031.25	281.914	31.4165	9.58837	6.01389e-217	1.50407e-213	Null_Model_OpenChrom	human
Roadmapepigenomics_ActiveChromatin	CD14_Primary	1_TssA	10891	35894	0.303421	1253.75	306.788	31.4134	8.68674	6.63228e-217	1.65873e-213	Null_Model_OpenChrom	human
DNaseI_Duke	GM18507	Dnase	24082	35894	0.67092	5267.74	598.963	31.4114	4.5716	7.07334e-217	1.76904e-213	Null_Model_OpenChrom	human
DNaseClusters	GM19238	Dnase	24468	35894	0.681674	5405.81	606.94	31.407	4.52624	8.10943e-217	2.02817e-213	Null_Model_OpenChrom	human
Roadmapepigenomics_ActiveChromatin	CD56_Primary	1_TssA	10860	35894	0.302558	1273.21	305.252	31.4061	8.52959	8.34266e-217	2.0865e-213	Null_Model_OpenChrom	human
DNaseClusters	GM12891	Dnase	23560	35894	0.656377	5322.32	580.755	31.4034	4.42664	9.09697e-217	2.27515e-213	Null_Model_OpenChrom	human
Roadmapepigenomics_ActiveChromatin	CD8_Memory_Primary	1_TssA	12849	35894	0.357971	1743.49	353.644	31.4031	7.3697	9.19158e-217	2.29881e-213	Null_Model_OpenChrom	human
Roadmapepigenomics_ActiveChromatin	CD4_Naive_Primary	1_TssA	13170	35894	0.366914	1788.31	362.444	31.4026	7.36449	9.31098e-217	2.32868e-213	Null_Model_OpenChrom	human
Roadmapepigenomics_ActiveChromatin	CD8_Naive_Primary	1_TssA	12740	35894	0.354934	1629.98	353.8	31.4019	7.81605	9.51679e-217	2.38015e-213	Null_Model_OpenChrom	human
Roadmapepigenomics_ActiveChromatin	CD34	1_TssA	10698	35894	0.298044	1281.45	299.942	31.3946	8.34835	1.19985e-216	3.00082e-213	Null_Model_OpenChrom	human
GSE62742_Histone	GM18510	H3K4ME3	19690	35894	0.54856	4096.26	496.711	31.394	4.80683	1.22216e-216	3.05662e-213	Null_Model_OpenChrom	human
Roadmapepigenomics_Histone_narrow	GM12878_Lymphoblastoid	H2A.Z	19290	35894	0.537416	3857.58	491.575	31.3938	5.00055	1.22916e-216	3.07413e-213	Null_Model_OpenChrom	human
Roadmapepigenomics_ActiveChromatin	CD4+_CD25-_IL17-_PMA-Ionomycin_stimulated_MACS_purified_Th_Primary	1_TssA	12318	35894	0.343177	1595.29	341.557	31.3936	7.7215	1.23607e-216	3.09142e-213	Null_Model_OpenChrom	human
Roadmapepigenomics_ActiveChromatin	CD3_Primary_Peripheral_UW	1_TssA	10592	35894	0.295091	1261.13	297.224	31.3934	8.39883	1.24407e-216	3.11142e-213	Null_Model_OpenChrom	human
Roadmapepigenomics_ActiveChromatin	Dnd41_TCell_Leukemia	1_TssA	9985	35894	0.27818	1110.9	282.683	31.3924	8.98821	1.28424e-216	3.21188e-213	Null_Model_OpenChrom	human
Roadmapepigenomics_ActiveChromatin	CD4+_CD25int_CD127+_Tmem_Primary	1_TssA	13344	35894	0.371761	1951.93	362.896	31.3921	6.8363	1.29604e-216	3.2414e-213	Null_Model_OpenChrom	human
Roadmapepigenomics_ActiveChromatin	CD4+_CD25-_CD45RO+_Memory_Primary	1_TssA	11708	35894	0.326183	1422.35	327.654	31.3918	8.23146	1.30954e-216	3.27517e-213	Null_Model_OpenChrom	human
Roadmapepigenomics_Histone_narrow	CD19_Primary_Cells_Cord_BI	H3K4me3	15856	35894	0.441745	2658.74	420.425	31.3903	5.96372	1.37334e-216	3.43471e-213	Null_Model_OpenChrom	human
GSE62742_Histone	GM18504	H3K4ME3	19718	35894	0.54934	4170.24	495.307	31.3901	4.72826	1.37878e-216	3.44833e-213	Null_Model_OpenChrom	human
GSE62742_Histone	GM19140	H3K4ME3	19962	35894	0.556138	4026.91	507.678	31.3882	4.95715	1.46672e-216	3.66826e-213	Null_Model_OpenChrom	human
GSE62742_Histone	GM18505	H3K4ME3	20056	35894	0.558756	4140.25	507.078	31.3872	4.84415	1.51399e-216	3.78648e-213	Null_Model_OpenChrom	human
GSE62742_Histone	GM18519	H3K4ME3	19511	35894	0.543573	4028.55	493.282	31.3866	4.84318	1.53984e-216	3.85114e-213	Null_Model_OpenChrom	human
GSE62742_Histone	GM19223	H3K4ME3	20194	35894	0.562601	4252.36	507.912	31.3866	4.74889	1.54193e-216	3.85637e-213	Null_Model_OpenChrom	human
GSE62742_Histone	GM18859	H3K4ME3	19550	35894	0.544659	3976.98	496.179	31.3859	4.91579	1.57573e-216	3.9409e-213	Null_Model_OpenChrom	human
GSE62742_Histone	GM18855	H3K4ME3	19830	35894	0.55246	3984.67	504.856	31.3858	4.97658	1.57964e-216	3.95068e-213	Null_Model_OpenChrom	human
GSE62742_Histone	GM19119	H3K4ME3	18876	35894	0.525882	3746.79	482.05	31.3851	5.03792	1.61351e-216	4.03539e-213	Null_Model_OpenChrom	human
GSE62742_Histone	GM19101	H3K4ME3	18701	35894	0.521006	3696.69	478.078	31.3846	5.05885	1.64076e-216	4.10355e-213	Null_Model_OpenChrom	human
Roadmapepigenomics_ActiveChromatin	CD4+_CD25-_CD45RA+_Naive_Primary	1_TssA	11604	35894	0.323285	1513.75	321.51	31.384	7.66573	1.6734e-216	4.18517e-213	Null_Model_OpenChrom	human
GSE62742_Histone	GM18516	H3K4ME3	19930	35894	0.555246	4327.29	497.169	31.3831	4.60566	1.71928e-216	4.29991e-213	Null_Model_OpenChrom	human
Roadmapepigenomics_ActiveChromatin	CD4+_CD25+_CD127-_Treg_Primary	1_TssA	11398	35894	0.317546	1371.08	319.506	31.3826	8.31314	1.74713e-216	4.36958e-213	Null_Model_OpenChrom	human
GSE62742_Histone	GM18858	H3K4ME3	19781	35894	0.551095	4122.61	498.951	31.3826	4.79817	1.74774e-216	4.37109e-213	Null_Model_OpenChrom	human
Roadmapepigenomics_ActiveChromatin	Adipose_Nuclei	1_TssA	11579	35894	0.322589	1620.93	317.326	31.3812	7.14343	1.82823e-216	4.57241e-213	Null_Model_OpenChrom	human
Roadmapepigenomics_ActiveChromatin	CD19_Primary_Cord_BI	1_TssA	9579	35894	0.266869	1081.22	270.792	31.3811	8.85941	1.82967e-216	4.576e-213	Null_Model_OpenChrom	human
GSE62742_Histone	GM19203	H3K4ME3	19255	35894	0.536441	3726.97	494.82	31.3811	5.16639	1.82991e-216	4.5766e-213	Null_Model_OpenChrom	human
GSE62742_Histone	GM19206	H3K4ME3	19499	35894	0.543238	4086.89	491.132	31.3808	4.77111	1.84936e-216	4.62524e-213	Null_Model_OpenChrom	human
GSE62742_Histone	GM19152	H3K4ME3	19150	35894	0.533515	3841.21	487.84	31.3808	4.98541	1.85239e-216	4.63282e-213	Null_Model_OpenChrom	human
GSE62742_Histone	GM19143	H3K4ME3	19568	35894	0.545161	4122.08	492.217	31.3803	4.74712	1.87691e-216	4.69416e-213	Null_Model_OpenChrom	human
GSE62742_Histone	GM18913	H3K4ME3	19093	35894	0.531927	3942.37	482.813	31.3799	4.84303	1.90001e-216	4.75193e-213	Null_Model_OpenChrom	human
GSE62742_Histone	GM19114	H3K4ME3	19943	35894	0.555608	4207.44	501.455	31.3798	4.73994	1.90897e-216	4.77434e-213	Null_Model_OpenChrom	human
Roadmapepigenomics_Histone_narrow	CD56_Primary_Cells	H3K4me3	16136	35894	0.449546	2829.07	424.08	31.3784	5.70365	1.9963e-216	4.99276e-213	Null_Model_OpenChrom	human
GSE62742_Histone	GM18502	H3K4ME3	19438	35894	0.541539	4101.12	488.777	31.3781	4.73968	2.0146e-216	5.03851e-213	Null_Model_OpenChrom	human
GSE62742_Histone	GM18871	H3K4ME3	19414	35894	0.54087	4100.07	488.047	31.378	4.73504	2.02234e-216	5.05788e-213	Null_Model_OpenChrom	human
GSE62742_Histone	GM19144	H3K4ME3	20190	35894	0.56249	4278.67	507.098	31.3773	4.71875	2.06766e-216	5.17122e-213	Null_Model_OpenChrom	human
Roadmapepigenomics_Histone_narrow	GM12878_Lymphoblastoid	H3K9ac	18081	35894	0.503733	3574.62	462.331	31.3766	5.05816	2.11102e-216	5.27967e-213	Null_Model_OpenChrom	human
GSE62742_Histone	GM18486	H3K4ME3	20744	35894	0.577924	4532.97	516.664	31.3763	4.57625	2.12797e-216	5.32205e-213	Null_Model_OpenChrom	human
GSE62742_Histone	GM18507	H3K4ME3	19294	35894	0.537527	3984.09	487.946	31.3762	4.84277	2.1344e-216	5.33814e-213	Null_Model_OpenChrom	human
GSE62742_Histone	GM19147	H3K4ME3	18587	35894	0.51783	3742.09	473.131	31.3759	4.96701	2.15927e-216	5.40034e-213	Null_Model_OpenChrom	human
GSE62742_Histone	GM18511	H3K4ME3	19374	35894	0.539756	4065.75	487.901	31.3757	4.76517	2.16851e-216	5.42343e-213	Null_Model_OpenChrom	human
Roadmapepigenomics_ActiveChromatin	Fetal_Adrenal_Gland	1_TssA	11401	35894	0.31763	1515.16	315.091	31.3745	7.52461	2.25148e-216	5.63096e-213	Null_Model_OpenChrom	human
GSE62742_Histone	GM19127	H3K4ME3	19926	35894	0.555135	4147.4	502.911	31.3745	4.80446	2.2533e-216	5.63551e-213	Null_Model_OpenChrom	human
GSE62742_Histone	GM19130	H3K4ME3	19886	35894	0.55402	4282.68	497.332	31.374	4.64336	2.28749e-216	5.72102e-213	Null_Model_OpenChrom	human
GSE62742_Histone	GM19160	H3K4ME3	18543	35894	0.516604	3821.42	469.233	31.3737	4.85239	2.309e-216	5.77481e-213	Null_Model_OpenChrom	human
GSE62742_Histone	GM18508	H3K4ME3	20281	35894	0.565025	4255.74	510.796	31.3731	4.76557	2.35479e-216	5.88934e-213	Null_Model_OpenChrom	human
Roadmapepigenomics_Dnase_narrow	CD3_Primary_Cells_Cord_BI	Dnase	25573	35894	0.712459	6729.02	600.649	31.3727	3.8004	2.38552e-216	5.96618e-213	Null_Model_OpenChrom	human
DNaseClusters	Jurkat	Dnase	20856	35894	0.581044	4760.36	513.055	31.3721	4.38118	2.42732e-216	6.07072e-213	Null_Model_OpenChrom	human
GSE62742_Histone	GM19153	H3K4ME3	19882	35894	0.553909	4348.27	495.167	31.3707	4.57239	2.54052e-216	6.35384e-213	Null_Model_OpenChrom	human
GSE62742_Histone	GM19102	H3K4ME3	19804	35894	0.551736	4316.58	493.698	31.3702	4.58789	2.57759e-216	6.44656e-213	Null_Model_OpenChrom	human
GSE62742_Histone	GM19137	H3K4ME3	20071	35894	0.559174	4323.98	501.978	31.3699	4.64179	2.60362e-216	6.51165e-213	Null_Model_OpenChrom	human
GSE62742_Histone	GM18522	H3K4ME3	19022	35894	0.529949	3931.01	481.076	31.3693	4.83896	2.65688e-216	6.64485e-213	Null_Model_OpenChrom	human
GSE62742_Histone	GM18856	H3K4ME3	19593	35894	0.545857	4278.99	488.185	31.3692	4.57888	2.65874e-216	6.64951e-213	Null_Model_OpenChrom	human
GSE62742_Histone	GM19093	H3K4ME3	19662	35894	0.54778	4337.92	488.511	31.369	4.53258	2.6809e-216	6.70493e-213	Null_Model_OpenChrom	human
GSE62742_Histone	GM19225	H3K4ME3	18526	35894	0.516131	3848.8	467.892	31.3688	4.81345	2.6975e-216	6.74644e-213	Null_Model_OpenChrom	human
GSE62742_Histone	GM19128	H3K4ME3	19733	35894	0.549758	4144.27	496.955	31.3685	4.76152	2.72262e-216	6.80928e-213	Null_Model_OpenChrom	human
GSE62742_Histone	GM19207	H3K4ME3	19147	35894	0.533432	4112.11	479.299	31.3685	4.65624	2.72321e-216	6.81075e-213	Null_Model_OpenChrom	human
BroadChromHMM	H1-hESC	ActivePromoter	9484	35894	0.264222	1126.69	266.425	31.3683	8.41761	2.73634e-216	6.84359e-213	Null_Model_OpenChrom	human
GSE62742_Histone	GM19222	H3K4ME3	19602	35894	0.546108	4117.05	493.653	31.3681	4.76118	2.75605e-216	6.89289e-213	Null_Model_OpenChrom	human
GSE62742_Histone	GM19171	H3K4ME3	19930	35894	0.555246	4296.46	498.402	31.3674	4.63871	2.82061e-216	7.05434e-213	Null_Model_OpenChrom	human
GSE62742_Histone	GM18499	H3K4ME3	19667	35894	0.547919	4106.5	496.084	31.3667	4.78924	2.87997e-216	7.2028e-213	Null_Model_OpenChrom	human
GSE62742_Histone	GM18498	H3K4ME3	19628	35894	0.546832	4270.7	489.612	31.3663	4.59597	2.91731e-216	7.29619e-213	Null_Model_OpenChrom	human
GSE62742_Histone	GM18489	H3K4ME3	20005	35894	0.557335	4262.16	501.904	31.3662	4.69363	2.92292e-216	7.31022e-213	Null_Model_OpenChrom	human
GSE62742_Histone	GM19209	H3K4ME3	19758	35894	0.550454	4285.44	493.296	31.3657	4.6105	2.97351e-216	7.43675e-213	Null_Model_OpenChrom	human
GSE62742_Histone	GM19108	H3K4ME3	19736	35894	0.549841	4132.86	497.459	31.3657	4.77539	2.97505e-216	7.4406e-213	Null_Model_OpenChrom	human
GSE62742_Histone	GM19116	H3K4ME3	19731	35894	0.549702	4154.35	496.62	31.3653	4.74947	3.0067e-216	7.51977e-213	Null_Model_OpenChrom	human
Roadmapepigenomics_Histone_narrow	CD19_Primary_Cells_Peripheral_UW	H3K27ac	18513	35894	0.515769	3454.99	480.094	31.3647	5.35834	3.06475e-216	7.66494e-213	Null_Model_OpenChrom	human
GSE62742_Histone	GM18909	H3K4ME3	19481	35894	0.542737	4134.78	489.285	31.3646	4.71149	3.07756e-216	7.69698e-213	Null_Model_OpenChrom	human
BroadChromHMM	HUVEC	ActivePromoter	10648	35894	0.296651	1401.19	294.817	31.3646	7.59923	3.07899e-216	7.70056e-213	Null_Model_OpenChrom	human
GSE62742_Histone	GM19141	H3K4ME3	20178	35894	0.562155	4428	502.17	31.3639	4.55692	3.14501e-216	7.86567e-213	Null_Model_OpenChrom	human
DNaseClusters	CD34+_Mobilized	Dnase	22597	35894	0.629548	5592.43	542.2	31.3621	4.04064	3.32296e-216	8.31072e-213	Null_Model_OpenChrom	human
GSE62742_Histone	GM19257	H3K4ME3	19260	35894	0.53658	4005.49	486.4	31.362	4.80841	3.33281e-216	8.33537e-213	Null_Model_OpenChrom	human
Roadmapepigenomics_Histone_narrow	Fetal_Thymus	H3K4me3	16289	35894	0.453808	3192.77	417.593	31.3613	5.10185	3.41693e-216	8.54575e-213	Null_Model_OpenChrom	human
GSE62742_Histone	GM18912	H3K4ME3	20074	35894	0.559258	4370.35	500.737	31.3611	4.59322	3.43478e-216	8.59039e-213	Null_Model_OpenChrom	human
DNaseClusters	GM19240	Dnase	24170	35894	0.673372	6168.37	574.016	31.3608	3.91838	3.4625e-216	8.65971e-213	Null_Model_OpenChrom	human
GSE62742_Histone	GM19099	H3K4ME3	19937	35894	0.555441	4227.55	500.933	31.3604	4.71597	3.512e-216	8.78351e-213	Null_Model_OpenChrom	human
GSE62742_Histone	GM18517	H3K4ME3	19333	35894	0.538614	3900.69	492.098	31.3602	4.9563	3.52946e-216	8.82717e-213	Null_Model_OpenChrom	human
GSE62742_Histone	GM19240	H3K4ME3	21343	35894	0.594612	5031.1	520.149	31.3601	4.24222	3.54594e-216	8.8684e-213	Null_Model_OpenChrom	human
GSE62742_Histone	GM19098	H3K4ME3	19771	35894	0.550816	4292.78	493.585	31.3588	4.60564	3.6942e-216	9.23919e-213	Null_Model_OpenChrom	human
Roadmapepigenomics_Histone_narrow	Thymus	H3K4me3	16531	35894	0.460551	3183.95	425.625	31.3587	5.19198	3.70215e-216	9.25907e-213	Null_Model_OpenChrom	human
GSE62742_Histone	GM18861	H3K4ME3	19748	35894	0.550176	4195	495.973	31.3586	4.70751	3.71437e-216	9.28963e-213	Null_Model_OpenChrom	human
GSE62742_Histone	GM18907	H3K4ME3	20383	35894	0.567866	4451.72	508.057	31.3573	4.57868	3.8722e-216	9.68436e-213	Null_Model_OpenChrom	human
DNaseClusters	GM12892	Dnase	23466	35894	0.653758	5837.99	562.167	31.3572	4.01953	3.87784e-216	9.69849e-213	Null_Model_OpenChrom	human
Roadmapepigenomics_ActiveChromatin	CD34_Primary	1_TssA	9799	35894	0.272998	1194.23	274.42	31.3563	8.20532	3.99734e-216	9.99735e-213	Null_Model_OpenChrom	human
GSE62742_Histone	GM19204	H3K4ME3	18641	35894	0.519335	3670.68	477.43	31.356	5.07835	4.02594e-216	1.00689e-212	Null_Model_OpenChrom	human
GSE62742_Histone	GM19190	H3K4ME3	20343	35894	0.566752	4566.31	503.152	31.3557	4.45502	4.06758e-216	1.0173e-212	Null_Model_OpenChrom	human
Roadmapepigenomics_ActiveChromatin	Chondrocytes_from_Bone_Marrow_Derived_Mesenchymal_Stem_Cell	1_TssA	12974	35894	0.361453	2004.21	349.851	31.3556	6.47336	4.0832e-216	1.02121e-212	Null_Model_OpenChrom	human
Roadmapepigenomics_ActiveChromatin	CD19_Primary_Cord_BI	2_TssAFlnk	15248	35894	0.424806	2644.97	401.947	31.355	5.76491	4.16334e-216	1.04125e-212	Null_Model_OpenChrom	human
Roadmapepigenomics_Histone_narrow	CD3_Primary_Cells_Peripheral_UWUW	H3K4me3	16987	35894	0.473255	3303.87	436.406	31.3541	5.14154	4.27567e-216	1.06934e-212	Null_Model_OpenChrom	human
GSE62742_Histone	GM18862	H3K4ME3	19415	35894	0.540898	4115.91	487.948	31.354	4.71707	4.29499e-216	1.07418e-212	Null_Model_OpenChrom	human
DNaseI_Duke	GM10248	Dnase	25682	35894	0.715496	6963.98	596.994	31.3538	3.68784	4.32009e-216	1.08045e-212	Null_Model_OpenChrom	human
GSE62742_Histone	GM18852	H3K4ME3	18789	35894	0.523458	3803.05	477.964	31.3537	4.9405	4.32717e-216	1.08223e-212	Null_Model_OpenChrom	human
GSE62742_Histone	GM18501	H3K4ME3	19886	35894	0.55402	4309.09	496.814	31.3536	4.6149	4.34502e-216	1.08669e-212	Null_Model_OpenChrom	human
Roadmapepigenomics_ActiveChromatin	Colonic_Mucosa	1_TssA	13217	35894	0.368223	2250.64	349.766	31.3534	5.87255	4.36613e-216	1.09197e-212	Null_Model_OpenChrom	human
BroadChromHMM	GM12878	ActivePromoter	12509	35894	0.348498	1849.95	339.966	31.3532	6.76179	4.39371e-216	1.09887e-212	Null_Model_OpenChrom	human
GSE62742_Histone	GM19239	H3K4ME3	21112	35894	0.588176	4779.54	520.925	31.3528	4.41716	4.45966e-216	1.11536e-212	Null_Model_OpenChrom	human
Roadmapepigenomics_ActiveChromatin	Esophagus	1_TssA	13402	35894	0.373377	2206.8	357.073	31.3526	6.07304	4.47774e-216	1.11988e-212	Null_Model_OpenChrom	human
Roadmapepigenomics_Histone_narrow	CD3_Primary_Cells_Cord_BI	H3K4me3	16012	35894	0.446091	3130.49	410.859	31.3526	5.11486	4.47982e-216	1.1204e-212	Null_Model_OpenChrom	human
GSE62742_Histone	GM19201	H3K4ME3	19846	35894	0.552906	4401.58	492.618	31.3517	4.50884	4.60967e-216	1.15288e-212	Null_Model_OpenChrom	human
Roadmapepigenomics_ActiveChromatin	Duodenum_Mucosa	1_TssA	13905	35894	0.387391	2396.1	367.091	31.3517	5.80317	4.61848e-216	1.15508e-212	Null_Model_OpenChrom	human
GSE62742_Histone	GM19092	H3K4ME3	19699	35894	0.54881	4424.93	487.188	31.3515	4.45182	4.63935e-216	1.1603e-212	Null_Model_OpenChrom	human
DNaseI_Duke	GM12878	Dnase	24648	35894	0.686689	6694.55	572.655	31.3513	3.6818	4.67286e-216	1.16868e-212	Null_Model_OpenChrom	human
GSE62742_Histone	GM19159	H3K4ME3	19268	35894	0.536803	4304.67	477.299	31.35	4.47607	4.86263e-216	1.21614e-212	Null_Model_OpenChrom	human
GSE62742_Histone	GM18520	H3K4ME3	19709	35894	0.549089	4299.53	491.541	31.3493	4.58399	4.96825e-216	1.24256e-212	Null_Model_OpenChrom	human
Roadmapepigenomics_Histone_narrow	CD8_Memory_Primary_Cells	H3K4me3	16457	35894	0.458489	3374.43	417.317	31.3493	4.87697	4.97777e-216	1.24494e-212	Null_Model_OpenChrom	human
Roadmapepigenomics_ActiveChromatin	Adult_Liver	1_TssA	11542	35894	0.321558	1631.8	316.124	31.3491	7.07315	5.00416e-216	1.25154e-212	Null_Model_OpenChrom	human
Roadmapepigenomics_Histone_narrow	CD4_Naive_Primary_Cells	H3K4me3	16952	35894	0.472279	3510.94	428.758	31.3488	4.82834	5.05232e-216	1.26358e-212	Null_Model_OpenChrom	human
GSE62742_Histone	GM18853	H3K4ME3	18906	35894	0.526718	3950.41	477.071	31.3488	4.78583	5.05529e-216	1.26433e-212	Null_Model_OpenChrom	human
GSE62742_Histone	GM19138	H3K4ME3	19963	35894	0.556165	4394.94	496.61	31.3487	4.54227	5.07246e-216	1.26862e-212	Null_Model_OpenChrom	human
DNaseClusters	Monocytes-CD14+_RO01746	Dnase	20421	35894	0.568925	4505.06	507.749	31.3461	4.5329	5.50265e-216	1.37621e-212	Null_Model_OpenChrom	human
Roadmapepigenomics_Histone_narrow	CD4_Memory_Primary_Cells	H3K4me3	16457	35894	0.458489	3313.48	419.308	31.3457	4.96668	5.56303e-216	1.39131e-212	Null_Model_OpenChrom	human
DNaseClusters	SK-N-SH_RA	Dnase	16058	35894	0.447373	3220.09	409.568	31.345	4.98682	5.68608e-216	1.42209e-212	Null_Model_OpenChrom	human
BroadChromHMM	K562	ActivePromoter	11223	35894	0.312671	1590.97	307.293	31.3448	7.0542	5.72363e-216	1.43148e-212	Null_Model_OpenChrom	human
Roadmapepigenomics_ActiveChromatin	Fetal_Intestine_Large	1_TssA	12408	35894	0.345685	1989.54	332.389	31.3442	6.23662	5.83799e-216	1.46008e-212	Null_Model_OpenChrom	human
GSE62742_Histone	GM19172	H3K4ME3	19177	35894	0.534268	4144.28	479.613	31.3434	4.62735	5.97962e-216	1.4955e-212	Null_Model_OpenChrom	human
GSE62742_Histone	GM18523	H3K4ME3	18437	35894	0.513651	3994.33	460.789	31.3433	4.61579	5.99601e-216	1.4996e-212	Null_Model_OpenChrom	human
Roadmapepigenomics_Histone_narrow	GM12878_Lymphoblastoid	H3K4me3	18927	35894	0.527303	3993.06	476.47	31.3429	4.73997	6.08507e-216	1.52188e-212	Null_Model_OpenChrom	human
GSE62742_Histone	GM19131	H3K4ME3	19766	35894	0.550677	4274.89	494.249	31.3427	4.62374	6.10846e-216	1.52773e-212	Null_Model_OpenChrom	human
GSE62742_Histone	GM18916	H3K4ME3	18386	35894	0.51223	3810.57	465.038	31.3424	4.825	6.16797e-216	1.54261e-212	Null_Model_OpenChrom	human
Roadmapepigenomics_Histone_narrow	CD8_Naive_Primary_Cells	H3K4me3	16336	35894	0.455118	3099.79	422.315	31.3421	5.27004	6.24239e-216	1.56122e-212	Null_Model_OpenChrom	human
Roadmapepigenomics_ActiveChromatin	CD56_Primary	2_TssAFlnk	11273	35894	0.314064	1735.22	304.33	31.3402	6.49659	6.6105e-216	1.65328e-212	Null_Model_OpenChrom	human
Roadmapepigenomics_Dnase_narrow	CD19_Primary_Cells_Peripheral_UW	Dnase	26205	35894	0.730066	7686.86	590.88	31.3399	3.40906	6.67131e-216	1.6685e-212	Null_Model_OpenChrom	human
GSE62742_Histone	GM19210	H3K4ME3	19458	35894	0.542096	4261.84	484.883	31.3399	4.56563	6.68624e-216	1.67223e-212	Null_Model_OpenChrom	human
Roadmapepigenomics_Histone_narrow	CD4+_CD25int_CD127+_Tmem_Primary_Cellsls	H3K4me3	17404	35894	0.484872	3707.49	437.033	31.3397	4.69428	6.71015e-216	1.67821e-212	Null_Model_OpenChrom	human
BroadChromHMM	NHLF	ActivePromoter	11646	35894	0.324455	1815.4	313.678	31.3397	6.4151	6.71456e-216	1.67931e-212	Null_Model_OpenChrom	human
BroadChromHMM	NHEK	ActivePromoter	11573	35894	0.322422	1749.5	313.453	31.3397	6.61502	6.73035e-216	1.68326e-212	Null_Model_OpenChrom	human
Roadmapepigenomics_Histone_narrow	Peripheral_Blood_Mononuclear_Primary_Cells	H3K4me3	16365	35894	0.455926	3179.29	420.742	31.3392	5.14737	6.83204e-216	1.70869e-212	Null_Model_OpenChrom	human
Roadmapepigenomics_ActiveChromatin	Breast_vHMEC	1_TssA	12010	35894	0.334596	1894.16	322.79	31.3388	6.34053	6.91565e-216	1.7296e-212	Null_Model_OpenChrom	human
Roadmapepigenomics_ActiveChromatin	Fetal_Intestine_Small	1_TssA	12421	35894	0.346047	1935.41	334.595	31.3382	6.41775	7.0545e-216	1.76433e-212	Null_Model_OpenChrom	human
GSE62742_Histone	GM18870	H3K4ME3	19223	35894	0.535549	4050.97	484.161	31.3367	4.74529	7.37862e-216	1.84539e-212	Null_Model_OpenChrom	human
GSE62742_Histone	GM19203	H3K27AC	20519	35894	0.571655	4848.69	500.066	31.3365	4.23187	7.42713e-216	1.85753e-212	Null_Model_OpenChrom	human
DNaseClusters	CMK	Dnase	18727	35894	0.521731	4281.86	460.983	31.3355	4.37357	7.66395e-216	1.91675e-212	Null_Model_OpenChrom	human
Roadmapepigenomics_Histone_narrow	CD14_Primary_Cells	H3K4me3	15113	35894	0.421045	2750.65	394.519	31.3352	5.49433	7.72796e-216	1.93276e-212	Null_Model_OpenChrom	human
Roadmapepigenomics_ActiveChromatin	CD4+_CD25-_IL17+_PMA-Ionomcyin_stimulated_Th17_Primary	1_TssA	9089	35894	0.253218	1146.2	253.48	31.335	7.92971	7.7922e-216	1.94883e-212	Null_Model_OpenChrom	human
DNaseClusters	Urothelia	Dnase	20935	35894	0.583245	5149.84	503.759	31.3347	4.06518	7.85076e-216	1.96347e-212	Null_Model_OpenChrom	human
GSE62742_Histone	GM18519	H3K27AC	20156	35894	0.561542	4988.29	484.074	31.3334	4.04066	8.17953e-216	2.0457e-212	Null_Model_OpenChrom	human
Roadmapepigenomics_Histone_narrow	CD34_Primary_Cells	H3K4me3	16175	35894	0.450632	3446.14	406.254	31.3323	4.69365	8.47768e-216	2.12027e-212	Null_Model_OpenChrom	human
DNaseI_Duke	GM10266	Dnase	24813	35894	0.691285	7613.83	548.94	31.3316	3.25894	8.66044e-216	2.16598e-212	Null_Model_OpenChrom	human
DNaseClusters	HL-60	Dnase	20302	35894	0.56561	4975.66	489.185	31.3304	4.08027	9.00034e-216	2.25099e-212	Null_Model_OpenChrom	human
Roadmapepigenomics_Histone_narrow	CD4+_CD25-_CD45RA+_Naive_Primary_Cellsd_	H3K4me3	17915	35894	0.499108	4052.34	442.477	31.3296	4.42091	9.21243e-216	2.30403e-212	Null_Model_OpenChrom	human
GSE62742_Histone	GM19238	H3K4ME3	20590	35894	0.573633	4942.32	499.461	31.3291	4.16606	9.37073e-216	2.34362e-212	Null_Model_OpenChrom	human
Roadmapepigenomics_ActiveChromatin	Colon_Smooth_Muscle	1_TssA	13514	35894	0.376497	2397.93	354.822	31.3286	5.63569	9.52151e-216	2.38133e-212	Null_Model_OpenChrom	human
Roadmapepigenomics_Dnase_narrow	GM12878_Lymphoblastoid	Dnase	25706	35894	0.716164	7613.25	577.516	31.3285	3.37648	9.53458e-216	2.3846e-212	Null_Model_OpenChrom	human
Roadmapepigenomics_Histone_narrow	CD4+_CD25-_Th_Primary_Cells-I	H3K4me3	17674	35894	0.492394	3868.78	440.665	31.3282	4.56836	9.65059e-216	2.41361e-212	Null_Model_OpenChrom	human
BroadChromHMM	HSMM	ActivePromoter	10920	35894	0.304229	1629.34	296.56	31.3281	6.70209	9.67452e-216	2.4196e-212	Null_Model_OpenChrom	human
Roadmapepigenomics_ActiveChromatin	Brain_Germinal_Matrix	1_TssA	11375	35894	0.316905	1853.31	303.942	31.3274	6.13767	9.89417e-216	2.47453e-212	Null_Model_OpenChrom	human
Roadmapepigenomics_ActiveChromatin	CD19_Primary_Peripheral_UW	ActiveChromatin	25625	35894	0.713908	7853.33	567.293	31.3272	3.26295	9.96171e-216	2.49142e-212	Null_Model_OpenChrom	human
GSE62742_Histone	GM19119	H3K27AC	20564	35894	0.572909	5152.27	491.964	31.3269	3.99125	1.00304e-215	2.5086e-212	Null_Model_OpenChrom	human
GSE62742_Histone	GM19200	H3K4ME3	19797	35894	0.551541	4694.19	482.129	31.3253	4.21734	1.05691e-215	2.64333e-212	Null_Model_OpenChrom	human
GSE62742_Histone	GM18517	H3K27AC	20810	35894	0.579763	5389.45	492.28	31.3248	3.86125	1.07352e-215	2.68487e-212	Null_Model_OpenChrom	human
DNaseClusters	NB4	Dnase	20229	35894	0.563576	4836.55	491.384	31.3247	4.18253	1.07599e-215	2.69106e-212	Null_Model_OpenChrom	human
Roadmapepigenomics_ActiveChromatin	4star	1_TssA	12570	35894	0.350198	2062.4	335.443	31.3246	6.09484	1.08022e-215	2.70163e-212	Null_Model_OpenChrom	human
Roadmapepigenomics_Histone_narrow	CD4+_CD25+_CD127-_Treg_Primary_CellsTh	H3K4me3	18428	35894	0.513401	4175.02	455.012	31.3244	4.41387	1.08621e-215	2.71662e-212	Null_Model_OpenChrom	human
Roadmapepigenomics_Histone_narrow	GM12878_Lymphoblastoid	H3K4me2	23047	35894	0.642085	6204.91	537.686	31.3233	3.71432	1.12417e-215	2.81155e-212	Null_Model_OpenChrom	human
Roadmapepigenomics_Histone_narrow	CD8_Naive_Primary_Cells	H3K27ac	15086	35894	0.420293	2913.79	388.603	31.323	5.17746	1.13569e-215	2.84036e-212	Null_Model_OpenChrom	human
Roadmapepigenomics_Histone_narrow	CD4+_CD25-_CD45RO+_Memory_Primary_Cells	H3K4me3	16359	35894	0.455759	3344.02	415.514	31.3226	4.89202	1.14858e-215	2.87259e-212	Null_Model_OpenChrom	human
GSE62742_Histone	GM18859	H3K27AC	20673	35894	0.575946	5358.56	488.93	31.3224	3.85794	1.15769e-215	2.89538e-212	Null_Model_OpenChrom	human
Roadmapepigenomics_Histone_narrow	GM12878_Lymphoblastoid	H3K27ac	18998	35894	0.529281	4404.88	465.912	31.3216	4.31294	1.18505e-215	2.96381e-212	Null_Model_OpenChrom	human
Roadmapepigenomics_ActiveChromatin	Brain_Substantia_Nigra	1_TssA	13854	35894	0.38597	2500.91	362.473	31.3212	5.53958	1.20164e-215	3.00531e-212	Null_Model_OpenChrom	human
Roadmapepigenomics_ActiveChromatin	A549_EtOH_0.02pct_Lung_Carcinoma	1_TssA	13827	35894	0.385218	2569.76	359.418	31.3207	5.38066	1.2177e-215	3.04547e-212	Null_Model_OpenChrom	human
Roadmapepigenomics_ActiveChromatin	Fetal_Lung	1_TssA	11965	35894	0.333343	1825.95	323.717	31.3207	6.55275	1.22018e-215	3.05168e-212	Null_Model_OpenChrom	human
Roadmapepigenomics_ActiveChromatin	CD19_Primary_Cord_BI	ActiveChromatin	23588	35894	0.657157	6725.44	538.396	31.32	3.50728	1.24594e-215	3.1161e-212	Null_Model_OpenChrom	human
GSE62742_Histone	GM19152	H3K27AC	20507	35894	0.571321	5109.04	491.636	31.3198	4.01387	1.253e-215	3.13375e-212	Null_Model_OpenChrom	human
DNaseI_Duke	GM20000	Dnase	25466	35894	0.709478	7497.32	573.727	31.3192	3.39668	1.27657e-215	3.1927e-212	Null_Model_OpenChrom	human
DNaseI_Duke	GM19238	Dnase	24937	35894	0.69474	7415.58	559.451	31.319	3.36279	1.28801e-215	3.22131e-212	Null_Model_OpenChrom	human
GSE62742_Histone	GM18508	H3K27AC	20620	35894	0.574469	5237.43	491.172	31.3181	3.93705	1.32362e-215	3.31036e-212	Null_Model_OpenChrom	human
GSE62742_Histone	GM18861	H3K27AC	20327	35894	0.566306	5470.03	474.404	31.3171	3.71607	1.36488e-215	3.41356e-212	Null_Model_OpenChrom	human
GSE62742_Histone	GM19206	H3K27AC	20762	35894	0.578425	5454.38	488.801	31.3167	3.80648	1.3834e-215	3.45989e-212	Null_Model_OpenChrom	human
Roadmapepigenomics_ActiveChromatin	Bone_Marrow_Derived_Mesenchymal_Stem_Cell	1_TssA	13299	35894	0.370508	2356.27	349.425	31.3164	5.64409	1.39755e-215	3.49528e-212	Null_Model_OpenChrom	human
BroadChromHMM	HMEC	ActivePromoter	10477	35894	0.291887	1572.29	284.35	31.316	6.66351	1.41214e-215	3.53177e-212	Null_Model_OpenChrom	human
Roadmapepigenomics_Histone_narrow	CD4+_CD25-_IL17+_PMA-Ionomcyin_stimulated_Th17_Primary_Cells	H3K4me3	17656	35894	0.491893	3908.47	439.006	31.3151	4.51737	1.45252e-215	3.63276e-212	Null_Model_OpenChrom	human
GSE62742_Histone	GM19222	H3K27AC	20790	35894	0.579205	5629.94	484.121	31.3146	3.69276	1.47443e-215	3.68755e-212	Null_Model_OpenChrom	human
GSE62742_Histone	GM18870	H3K27AC	19961	35894	0.55611	5264.85	469.318	31.3138	3.79137	1.5124e-215	3.78251e-212	Null_Model_OpenChrom	human
GSE62742_Histone	GM18501	H3K27AC	20471	35894	0.570318	5468.24	479.117	31.3133	3.74362	1.53558e-215	3.84049e-212	Null_Model_OpenChrom	human
Roadmapepigenomics_Histone_narrow	Peripheral_Blood_Mononuclear_Primary_Cells	H3K27ac	13582	35894	0.378392	2558.83	352.03	31.3131	5.30789	1.54581e-215	3.86606e-212	Null_Model_OpenChrom	human
GSE62742_Histone	GM18516	H3K27AC	20404	35894	0.568452	5390.23	479.489	31.312	3.78537	1.60115e-215	4.00448e-212	Null_Model_OpenChrom	human
Roadmapepigenomics_Histone_narrow	CD4_Naive_Primary_Cells	H3K27ac	15352	35894	0.427704	2982.06	395.055	31.3119	5.14811	1.60568e-215	4.0158e-212	Null_Model_OpenChrom	human
Roadmapepigenomics_Histone_narrow	Left_Ventricle	H3K4me3	14898	35894	0.415055	3121.66	376.108	31.3111	4.77246	1.64909e-215	4.12438e-212	Null_Model_OpenChrom	human
Roadmapepigenomics_ActiveChromatin	Brain_Cingulate_Gyrus	1_TssA	13787	35894	0.384103	2501.47	360.441	31.3104	5.51156	1.68657e-215	4.21811e-212	Null_Model_OpenChrom	human
GSE62742_Histone	GM18862	H3K27AC	20134	35894	0.560929	5233.96	475.891	31.3098	3.8468	1.71648e-215	4.29292e-212	Null_Model_OpenChrom	human
GSE62742_Histone	GM18852	H3K27AC	20873	35894	0.581518	5538.04	489.783	31.3097	3.76902	1.72212e-215	4.30701e-212	Null_Model_OpenChrom	human
Roadmapepigenomics_ActiveChromatin	Brain_Hippocampus_Middle	1_TssA	13780	35894	0.383908	2481.52	360.863	31.3096	5.55305	1.72487e-215	4.31391e-212	Null_Model_OpenChrom	human
Roadmapepigenomics_Histone_narrow	ES-WA7_Cell_Line	H3K9ac	8546	35894	0.23809	1103.15	237.72	31.3093	7.74693	1.7413e-215	4.35499e-212	Null_Model_OpenChrom	human
GSE62742_Histone	GM19239	H3K27AC	20813	35894	0.579846	5447.37	490.771	31.3092	3.82074	1.74959e-215	4.37573e-212	Null_Model_OpenChrom	human
Roadmapepigenomics_Histone_narrow	Dnd41_TCell_Leukemia	H3K4me3	14982	35894	0.417396	3105.19	379.343	31.3089	4.82482	1.76451e-215	4.41304e-212	Null_Model_OpenChrom	human
Roadmapepigenomics_Dnase_narrow	CD56_Primary_Cells	Dnase	23550	35894	0.656099	6783.91	535.512	31.3085	3.47145	1.78545e-215	4.46541e-212	Null_Model_OpenChrom	human
Roadmapepigenomics_ActiveChromatin	Aorta	1_TssA	13643	35894	0.380091	2703.56	349.408	31.3085	5.04631	1.78679e-215	4.46877e-212	Null_Model_OpenChrom	human
Roadmapepigenomics_Histone_narrow	CD4+_CD25-_IL17-_PMA-Ionomycin_stimulated_MACS_purified_Th_Primary_Cells	H3K4me3	18090	35894	0.503984	4320.22	439.81	31.3085	4.18729	1.78961e-215	4.47581e-212	Null_Model_OpenChrom	human
GSE62742_Histone	GM19147	H3K27AC	20257	35894	0.564356	5209.45	480.623	31.3084	3.88851	1.79335e-215	4.48518e-212	Null_Model_OpenChrom	human
Roadmapepigenomics_ActiveChromatin	Breast_Myoepithelial	1_TssA	13413	35894	0.373684	2450.72	350.147	31.3077	5.47309	1.83464e-215	4.58843e-212	Null_Model_OpenChrom	human
GSE62742_Histone	GM19130	H3K27AC	20774	35894	0.57876	5558.76	485.992	31.3076	3.73717	1.83804e-215	4.59695e-212	Null_Model_OpenChrom	human
GSE62742_Histone	GM19143	H3K27AC	20862	35894	0.581211	5550.5	489.082	31.3066	3.75858	1.89641e-215	4.74292e-212	Null_Model_OpenChrom	human
Roadmapepigenomics_Histone_narrow	CD4_Naive_Primary_Cells	H3K9ac	14839	35894	0.413412	2935.97	380.21	31.3065	5.05421	1.90562e-215	4.76595e-212	Null_Model_OpenChrom	human
GSE62742_Histone	GM19101	H3K27AC	20087	35894	0.55962	4932.99	484.062	31.3059	4.07197	1.938e-215	4.84693e-212	Null_Model_OpenChrom	human
GSE62742_Histone	GM18913	H3K27AC	20631	35894	0.574776	5336.43	488.552	31.3059	3.86607	1.93831e-215	4.84772e-212	Null_Model_OpenChrom	human
DNaseClusters	HCT-116	Dnase	17189	35894	0.478882	3910.87	424.144	31.3057	4.39518	1.94893e-215	4.87428e-212	Null_Model_OpenChrom	human
Roadmapepigenomics_ActiveChromatin	CD3_Primary_Peripheral_UW	2_TssAFlnk	11119	35894	0.309773	1816.24	297.164	31.3052	6.122	1.98258e-215	4.95842e-212	Null_Model_OpenChrom	human
Roadmapepigenomics_Histone_narrow	Placenta_Amnion	H3K4me3	13946	35894	0.388533	2750.12	357.638	31.3051	5.07105	1.99045e-215	4.97813e-212	Null_Model_OpenChrom	human
Roadmapepigenomics_Histone_narrow	Dnd41_TCell_Leukemia	H2A.Z	14933	35894	0.416031	2978.64	381.869	31.3049	5.01337	2.00208e-215	5.00721e-212	Null_Model_OpenChrom	human
GSE62742_Histone	GM19204	H3K27AC	20888	35894	0.581936	5451.63	493.106	31.3044	3.83152	2.03516e-215	5.08993e-212	Null_Model_OpenChrom	human
Roadmapepigenomics_Histone_narrow	H1_BMP4_Derived_Mesendoderm_Cultured_Cells	H3K4me3	13375	35894	0.372625	2485.86	347.853	31.3038	5.38043	2.06915e-215	5.17493e-212	Null_Model_OpenChrom	human
Roadmapepigenomics_Histone_narrow	CD56_Primary_Cells	H3K27ac	17671	35894	0.492311	3909.56	439.611	31.3037	4.51995	2.07813e-215	5.19741e-212	Null_Model_OpenChrom	human
Roadmapepigenomics_ActiveChromatin	Brain_Inferior_Temporal_Lobe	1_TssA	13872	35894	0.386471	2696.64	357.007	31.3029	5.14418	2.12754e-215	5.32099e-212	Null_Model_OpenChrom	human
DNaseI_Duke	GM19240	Dnase	24244	35894	0.675433	7082.47	548.242	31.3028	3.4231	2.13431e-215	5.33791e-212	Null_Model_OpenChrom	human
GSE62742_Histone	GM18871	H3K27AC	20044	35894	0.558422	5187.9	474.612	31.3016	3.86361	2.21995e-215	5.55211e-212	Null_Model_OpenChrom	human
Roadmapepigenomics_Histone_narrow	CD34_Cultured_Cells	H3K4me3	17116	35894	0.476848	3868.93	423.209	31.3015	4.42396	2.22947e-215	5.5759e-212	Null_Model_OpenChrom	human
GSE62742_Histone	GM19127	H3K27AC	20847	35894	0.580793	5392.39	493.74	31.3011	3.86601	2.25211e-215	5.63252e-212	Null_Model_OpenChrom	human
GSE62742_Histone	GM18510	H3K27AC	20584	35894	0.573466	5439.36	483.852	31.3001	3.78427	2.32317e-215	5.81024e-212	Null_Model_OpenChrom	human
Roadmapepigenomics_Histone_narrow	Fetal_Placenta	H3K4me3	14461	35894	0.402881	2834.49	371.453	31.3001	5.1018	2.32735e-215	5.82071e-212	Null_Model_OpenChrom	human
GSE62742_Histone	GM19160	H3K27AC	19483	35894	0.542793	4930.7	464.931	31.2999	3.95137	2.3406e-215	5.85383e-212	Null_Model_OpenChrom	human
GSE62742_Histone	GM18502	H3K27AC	20296	35894	0.565443	5402.75	475.835	31.2992	3.7566	2.3941e-215	5.98764e-212	Null_Model_OpenChrom	human
Roadmapepigenomics_ActiveChromatin	Brain_Angular_Gyrus	1_TssA	14018	35894	0.390539	2712.07	361.225	31.2989	5.16875	2.4165e-215	6.04366e-212	Null_Model_OpenChrom	human
Roadmapepigenomics_Histone_narrow	Small_Intestine	H3K4me3	14345	35894	0.399649	2803.88	368.741	31.2987	5.11613	2.42909e-215	6.07516e-212	Null_Model_OpenChrom	human
GSE62742_Histone	GM18855	H3K27AC	21070	35894	0.587006	5403.44	500.554	31.2984	3.89937	2.45034e-215	6.1283e-212	Null_Model_OpenChrom	human
Roadmapepigenomics_ActiveChromatin	CD4+_CD25-_IL17+_PMA-Ionomcyin_stimulated_Th17_Primary	3_TxFlnk	8308	35894	0.231459	1088.02	230.686	31.2978	7.63592	2.49625e-215	6.24311e-212	Null_Model_OpenChrom	human
Roadmapepigenomics_ActiveChromatin	Duodenum_Smooth_Muscle	1_TssA	13688	35894	0.381345	2577.66	354.989	31.2977	5.31025	2.50623e-215	6.26809e-212	Null_Model_OpenChrom	human
Misc_Histone	NeutrophilCells	H3K4me3	16140	35894	0.449657	3552.08	402.2	31.2977	4.54381	2.50878e-215	6.27446e-212	Null_Model_OpenChrom	human
Roadmapepigenomics_Histone_narrow	Sigmoid_Colon	H3K4me3	14495	35894	0.403828	2929.71	369.527	31.2976	4.94759	2.51807e-215	6.2977e-212	Null_Model_OpenChrom	human
GSE62742_Histone	GM18909	H3K27AC	20564	35894	0.572909	5496.35	481.437	31.2972	3.74139	2.54538e-215	6.366e-212	Null_Model_OpenChrom	human
GSE62742_Histone	GM19140	H3K27AC	20818	35894	0.579986	5169.01	500.017	31.2969	4.02746	2.5686e-215	6.42406e-212	Null_Model_OpenChrom	human
GSE62742_Histone	GM18499	H3K27AC	20685	35894	0.57628	5519.95	484.562	31.2964	3.74732	2.61181e-215	6.53214e-212	Null_Model_OpenChrom	human
GSE62742_Histone	GM18489	H3K27AC	20517	35894	0.5716	5405.7	482.848	31.2962	3.79544	2.62758e-215	6.57158e-212	Null_Model_OpenChrom	human
GSE62742_Histone	GM18916	H3K27AC	19800	35894	0.551624	5130.97	468.724	31.2957	3.85892	2.67259e-215	6.68414e-212	Null_Model_OpenChrom	human
GSE62742_Histone	GM18505	H3K27AC	20294	35894	0.565387	5233.56	481.234	31.2955	3.87766	2.68818e-215	6.72314e-212	Null_Model_OpenChrom	human
Roadmapepigenomics_ActiveChromatin	CD19_Primary_Peripheral_UW	2_TssAFlnk	11271	35894	0.314008	1760.11	303.906	31.2955	6.40357	2.68837e-215	6.72361e-212	Null_Model_OpenChrom	human
Roadmapepigenomics_ActiveChromatin	Brain_Anterior_Caudate	1_TssA	14538	35894	0.405026	2969.01	369.677	31.2949	4.89658	2.73855e-215	6.84912e-212	Null_Model_OpenChrom	human
GSE62742_Histone	GM19114	H3K27AC	20653	35894	0.575389	5718.91	477.222	31.2938	3.61135	2.83289e-215	7.08505e-212	Null_Model_OpenChrom	human
Roadmapepigenomics_Histone_narrow	Aorta	H3K4me3	13573	35894	0.378141	2669.5	348.43	31.2932	5.08447	2.88611e-215	7.21815e-212	Null_Model_OpenChrom	human
Roadmapepigenomics_ActiveChromatin	Fetal_Brain_Female	1_TssA	12773	35894	0.355853	2291.49	334.948	31.2929	5.57411	2.91206e-215	7.28306e-212	Null_Model_OpenChrom	human
Roadmapepigenomics_Histone_narrow	CD15_Primary_Cellst_	H3K4me3	17169	35894	0.478325	3932.62	422.996	31.2919	4.36579	3.00435e-215	7.51388e-212	Null_Model_OpenChrom	human
Roadmapepigenomics_ActiveChromatin	ES-WA7	1_TssA	12595	35894	0.350894	2281.13	329.61	31.2912	5.52139	3.07667e-215	7.69475e-212	Null_Model_OpenChrom	human
DNaseI_Duke	CLL	Dnase	23796	35894	0.662952	6883.19	540.515	31.2902	3.45712	3.17602e-215	7.94322e-212	Null_Model_OpenChrom	human
GSE62742_Histone	GM19128	H3K27AC	20797	35894	0.5794	5492.31	489.123	31.2901	3.78656	3.18326e-215	7.96132e-212	Null_Model_OpenChrom	human
GSE62742_Histone	GM18486	H3K27AC	20442	35894	0.56951	5485.29	478.009	31.2896	3.7267	3.23117e-215	8.08115e-212	Null_Model_OpenChrom	human
GSE62742_Histone	GM19131	H3K27AC	20009	35894	0.557447	5323.55	469.34	31.2896	3.75858	3.23191e-215	8.08302e-212	Null_Model_OpenChrom	human
Roadmapepigenomics_Histone_narrow	Pancreas	H3K4me3	15338	35894	0.427314	3341.27	383.413	31.2893	4.59047	3.26148e-215	8.15697e-212	Null_Model_OpenChrom	human
Roadmapepigenomics_ActiveChromatin	Brain_Dorsolateral_Prefrontal_Cortex	1_TssA	14028	35894	0.390817	2742.25	360.691	31.2892	5.1155	3.26858e-215	8.17473e-212	Null_Model_OpenChrom	human
GSE62742_Histone	GM18511	H3K27AC	20241	35894	0.56391	5406.26	474.123	31.2888	3.74399	3.31617e-215	8.29375e-212	Null_Model_OpenChrom	human
GSE62742_Histone	GM19223	H3K27AC	20240	35894	0.563883	5214.07	480.238	31.2885	3.8818	3.34555e-215	8.36722e-212	Null_Model_OpenChrom	human
GSE62742_Histone	GM19240	H3K27AC	20869	35894	0.581406	5677.07	485.557	31.2876	3.67601	3.43558e-215	8.59238e-212	Null_Model_OpenChrom	human
GSE62742_Histone	GM19116	H3K27AC	20801	35894	0.579512	5505.82	488.862	31.2873	3.77801	3.46967e-215	8.67765e-212	Null_Model_OpenChrom	human
Roadmapepigenomics_Histone_narrow	Pancreatic_Islets	H3K4me3	14419	35894	0.401711	3056.2	363.183	31.2867	4.71796	3.53562e-215	8.84258e-212	Null_Model_OpenChrom	human
Roadmapepigenomics_Histone_narrow	CD19_Primary_Cells_Cord_BI	H3K4me1	21383	35894	0.595726	5947.4	493.37	31.2861	3.59535	3.60722e-215	9.02167e-212	Null_Model_OpenChrom	human
Roadmapepigenomics_Histone_narrow	CD4+_CD25-_CD45RO+_Memory_Primary_Cells	H3K27ac	15799	35894	0.440157	3546.24	391.636	31.2861	4.45514	3.60926e-215	9.02676e-212	Null_Model_OpenChrom	human
GSE62742_Histone	GM19108	H3K27AC	20839	35894	0.580571	5465.19	491.401	31.2856	3.81304	3.65779e-215	9.14813e-212	Null_Model_OpenChrom	human
Roadmapepigenomics_ActiveChromatin	Adipose_Derived_Mesenchymal_Stem_Cell	1_TssA	13740	35894	0.382794	2704.86	352.741	31.284	5.07974	3.85559e-215	9.64284e-212	Null_Model_OpenChrom	human
DNaseI_Duke	GM19239	Dnase	24770	35894	0.690087	7960.08	537.339	31.2836	3.11178	3.89526e-215	9.74205e-212	Null_Model_OpenChrom	human
GSE62742_Histone	GM19144	H3K27AC	20768	35894	0.578593	5487.4	488.46	31.2832	3.78467	3.94666e-215	9.87059e-212	Null_Model_OpenChrom	human
GSE62742_Histone	GM19225	H3K27AC	20108	35894	0.560205	5489.09	467.322	31.2823	3.66326	4.06031e-215	1.01548e-211	Null_Model_OpenChrom	human
Roadmapepigenomics_Histone_narrow	Esophagus	H3K4me3	15582	35894	0.434112	3461.83	387.455	31.2815	4.50109	4.16177e-215	1.04086e-211	Null_Model_OpenChrom	human
Roadmapepigenomics_ActiveChromatin	Fetal_Heart	1_TssA	9245	35894	0.257564	1343	252.615	31.2808	6.88383	4.25466e-215	1.06409e-211	Null_Model_OpenChrom	human
Roadmapepigenomics_Histone_narrow	HMEC_Mammary_Epithelial	H3K4me3	14893	35894	0.414916	3443.89	366.013	31.2806	4.32447	4.27741e-215	1.06978e-211	Null_Model_OpenChrom	human
GSE62742_Histone	GM18522	H3K27AC	20554	35894	0.572631	5532.27	480.225	31.2806	3.71529	4.2852e-215	1.07173e-211	Null_Model_OpenChrom	human
GSE62742_Histone	GM18907	H3K27AC	20789	35894	0.579178	5700.97	482.346	31.2805	3.64657	4.29352e-215	1.07381e-211	Null_Model_OpenChrom	human
BroadChromHMM	HepG2	ActivePromoter	11046	35894	0.307739	1816.79	295.05	31.2802	6.07997	4.33826e-215	1.085e-211	Null_Model_OpenChrom	human
GSE62742_Histone	GM18507	H3K27AC	20421	35894	0.568925	5342.02	482.073	31.2795	3.82271	4.44036e-215	1.11053e-211	Null_Model_OpenChrom	human
GSE62742_Histone	GM19138	H3K27AC	20381	35894	0.567811	5582.91	473.095	31.2793	3.65061	4.4559e-215	1.11442e-211	Null_Model_OpenChrom	human
GSE62742_Histone	GM19102	H3K27AC	20372	35894	0.56756	5592.7	472.502	31.2788	3.64261	4.53483e-215	1.13416e-211	Null_Model_OpenChrom	human
GSE62742_Histone	GM19257	H3K27AC	20212	35894	0.563102	5351.1	475.121	31.2781	3.77717	4.62822e-215	1.15752e-211	Null_Model_OpenChrom	human
GSE62742_Histone	GM19093	H3K27AC	19805	35894	0.551764	5410.54	460.214	31.2778	3.66045	4.68097e-215	1.17071e-211	Null_Model_OpenChrom	human
GSE62742_Histone	GM19137	H3K27AC	20079	35894	0.559397	5388.44	469.685	31.2775	3.72631	4.72072e-215	1.18065e-211	Null_Model_OpenChrom	human
Roadmapepigenomics_Histone_narrow	Psoas_Muscle	H3K4me3	14941	35894	0.416253	3364.78	370.119	31.277	4.44041	4.79563e-215	1.19939e-211	Null_Model_OpenChrom	human
Roadmapepigenomics_Histone_narrow	Fetal_Adrenal_Gland	H3K4me3	15280	35894	0.425698	3368.42	380.846	31.2766	4.53625	4.85766e-215	1.2149e-211	Null_Model_OpenChrom	human
GSE62742_Histone	GM18520	H3K27AC	19892	35894	0.554187	5372.67	464.234	31.2759	3.70244	4.96092e-215	1.24073e-211	Null_Model_OpenChrom	human
GSE62742_Histone	GM19141	H3K27AC	20374	35894	0.567616	5615.27	471.893	31.2756	3.62832	5.01575e-215	1.25444e-211	Null_Model_OpenChrom	human
GSE62742_Histone	GM18858	H3K27AC	21017	35894	0.58553	5748.27	488.202	31.2754	3.65623	5.03686e-215	1.25972e-211	Null_Model_OpenChrom	human
GSE62742_Histone	GM19092	H3K27AC	20436	35894	0.569343	5852.36	466.298	31.2754	3.49192	5.04389e-215	1.26148e-211	Null_Model_OpenChrom	human
GSE62742_Histone	GM19099	H3K27AC	20365	35894	0.567365	5441.05	477.18	31.2753	3.74284	5.05849e-215	1.26513e-211	Null_Model_OpenChrom	human
GSE62742_Histone	GM19209	H3K27AC	20683	35894	0.576224	5663.37	480.243	31.275	3.65207	5.09882e-215	1.27521e-211	Null_Model_OpenChrom	human
GSE62742_Histone	GM18504	H3K27AC	19881	35894	0.553881	5363.19	464.201	31.2748	3.70693	5.12917e-215	1.2828e-211	Null_Model_OpenChrom	human
GSE62742_Histone	GM19098	H3K27AC	20365	35894	0.567365	5565.61	473.205	31.2748	3.65907	5.13587e-215	1.28448e-211	Null_Model_OpenChrom	human
Roadmapepigenomics_Histone_narrow	iPS_DF_6.9_Cell_Line	H3K4me3	14509	35894	0.404218	3037.38	366.834	31.272	4.77682	5.60737e-215	1.4024e-211	Null_Model_OpenChrom	human
DNaseClusters	HMVEC-dAd	Dnase	17572	35894	0.489553	4412.49	420.809	31.2719	3.98233	5.61831e-215	1.40514e-211	Null_Model_OpenChrom	human
Roadmapepigenomics_Histone_narrow	Fetal_Kidney	H3K4me3	14077	35894	0.392183	2961.52	355.451	31.2715	4.7533	5.69918e-215	1.42537e-211	Null_Model_OpenChrom	human
GSE62742_Histone	GM19171	H3K27AC	20652	35894	0.575361	5468.99	485.538	31.2705	3.7762	5.88122e-215	1.47089e-211	Null_Model_OpenChrom	human
GSE62742_Histone	GM18853	H3K27AC	20489	35894	0.57082	5491.45	479.622	31.2695	3.73107	6.06324e-215	1.51642e-211	Null_Model_OpenChrom	human
Roadmapepigenomics_Histone_narrow	Mobilized_CD34_Primary_Cells_Female	H3K4me3	18189	35894	0.506742	4539.46	436.515	31.2693	4.00687	6.09878e-215	1.5253e-211	Null_Model_OpenChrom	human
GSE62742_Histone	GM18912	H3K27AC	20189	35894	0.562462	5339.85	474.888	31.2688	3.78082	6.20775e-215	1.55256e-211	Null_Model_OpenChrom	human
Roadmapepigenomics_Histone_narrow	Fetal_Intestine_Large	H3K4me3	15303	35894	0.426339	3532.06	376.452	31.2681	4.33259	6.33519e-215	1.58443e-211	Null_Model_OpenChrom	human
Roadmapepigenomics_ActiveChromatin	ES-I3	1_TssA	12579	35894	0.350449	2384.86	326.027	31.2678	5.27453	6.39703e-215	1.5999e-211	Null_Model_OpenChrom	human
Roadmapepigenomics_Dnase_narrow	Mobilized_CD34_Primary_Cells_Male	Dnase	24379	35894	0.679194	7640.38	535.36	31.2661	3.19081	6.74526e-215	1.68699e-211	Null_Model_OpenChrom	human
Roadmapepigenomics_Histone_narrow	Dnd41_TCell_Leukemia	H3K9ac	15359	35894	0.427899	3443.2	381.117	31.2655	4.46068	6.87135e-215	1.71853e-211	Null_Model_OpenChrom	human
GSE62742_Histone	GM19153	H3K27AC	20560	35894	0.572798	5703.3	475.179	31.2655	3.60493	6.87537e-215	1.71953e-211	Null_Model_OpenChrom	human
Roadmapepigenomics_Histone_narrow	CD4+_CD25int_CD127+_Tmem_Primary_Cellsls	H3K27ac	16226	35894	0.452053	3841.89	396.113	31.2641	4.22344	7.17636e-215	1.79481e-211	Null_Model_OpenChrom	human
Roadmapepigenomics_ActiveChromatin	GM12878_Lymphoblastoid	ActiveChromatin	24349	35894	0.678359	8276.34	514.1	31.2637	2.942	7.27825e-215	1.82029e-211	Null_Model_OpenChrom	human
GSE62742_Histone	GM19210	H3K27AC	19962	35894	0.556138	5492.36	462.828	31.2635	3.6345	7.31425e-215	1.82929e-211	Null_Model_OpenChrom	human
Roadmapepigenomics_Histone_narrow	Fetal_Muscle_Trunk	H3K4me3	14611	35894	0.40706	3107.8	367.96	31.2621	4.70139	7.63851e-215	1.91039e-211	Null_Model_OpenChrom	human
GSE62742_Histone	GM19207	H3K27AC	20663	35894	0.575667	5821.43	474.75	31.2619	3.54947	7.69778e-215	1.92521e-211	Null_Model_OpenChrom	human
Roadmapepigenomics_Histone_narrow	CD4+_CD25-_Th_Primary_Cells-I	H3K27ac	14670	35894	0.408703	3330.01	362.747	31.2614	4.40539	7.80995e-215	1.95327e-211	Null_Model_OpenChrom	human
DNaseClusters	Ishikawa+4OHTAM_100nM_30m	Dnase	18673	35894	0.520226	4857.08	441.952	31.2612	3.84449	7.87447e-215	1.9694e-211	Null_Model_OpenChrom	human
DNaseI_Duke	GM13976	Dnase	25114	35894	0.699671	8192.07	541.31	31.2611	3.06565	7.89732e-215	1.97512e-211	Null_Model_OpenChrom	human
DNaseClusters	Ishikawa+Estradiol_100nM_1hr	Dnase	18366	35894	0.511673	4719.4	436.549	31.2602	3.89159	8.11219e-215	2.02886e-211	Null_Model_OpenChrom	human
DNaseI_Duke	CD20+_RO01794	Dnase	23909	35894	0.6661	7707.63	518.278	31.26	3.10199	8.156e-215	2.03981e-211	Null_Model_OpenChrom	human
GSE62742_Histone	GM19201	H3K27AC	20251	35894	0.564189	5746.41	464.012	31.2591	3.52412	8.39037e-215	2.09843e-211	Null_Model_OpenChrom	human
Roadmapepigenomics_ActiveChromatin	CD4+_CD25int_CD127+_Tmem_Primary	ActiveChromatin	19459	35894	0.542124	5360.86	451.01	31.259	3.62983	8.41984e-215	2.1058e-211	Null_Model_OpenChrom	human
Roadmapepigenomics_Histone_narrow	Fetal_Muscle_Leg	H3K4me3	15133	35894	0.421602	3335.43	377.422	31.2583	4.53705	8.6078e-215	2.15281e-211	Null_Model_OpenChrom	human
Roadmapepigenomics_ActiveChromatin	CD34_Primary	2_TssAFlnk	13261	35894	0.369449	2638.42	339.837	31.2579	5.02611	8.73095e-215	2.18361e-211	Null_Model_OpenChrom	human
Roadmapepigenomics_Histone_narrow	Pancreatic_Islets	H3K9ac	13383	35894	0.372848	2891.88	335.64	31.2571	4.62779	8.95137e-215	2.23874e-211	Null_Model_OpenChrom	human
DNaseI_Duke	GM13977	Dnase	24368	35894	0.678888	7828.81	529.135	31.257	3.11261	8.95681e-215	2.2401e-211	Null_Model_OpenChrom	human
Roadmapepigenomics_Histone_narrow	CD4+_CD25-_IL17+_PMA-Ionomcyin_stimulated_Th17_Primary_Cells	H3K27ac	16644	35894	0.463699	4001.58	404.498	31.2546	4.15936	9.66408e-215	2.41699e-211	Null_Model_OpenChrom	human
Roadmapepigenomics_Histone_narrow	NHLF_Lung_Fibroblasts	H3K4me3	14358	35894	0.400011	3131.41	359.209	31.2536	4.58516	9.9719e-215	2.49397e-211	Null_Model_OpenChrom	human
Roadmapepigenomics_Histone_narrow	Dnd41_TCell_Leukemia	H3K4me2	16570	35894	0.461637	4078.66	399.681	31.2533	4.06261	1.00694e-214	2.51836e-211	Null_Model_OpenChrom	human
Roadmapepigenomics_Histone_narrow	Fetal_Intestine_Small	H3K4me3	15485	35894	0.431409	3674.09	377.921	31.2523	4.21464	1.03786e-214	2.59568e-211	Null_Model_OpenChrom	human
DNaseClusters	Adult_CD4_Th0	Dnase	21676	35894	0.603889	6822.65	475.272	31.2523	3.17706	1.03803e-214	2.59612e-211	Null_Model_OpenChrom	human
GSE62742_Histone	GM19172	H3K27AC	19230	35894	0.535744	5110.48	451.808	31.2512	3.76286	1.07568e-214	2.69028e-211	Null_Model_OpenChrom	human
GSE62742_Histone	GM18498	H3K27AC	20531	35894	0.57199	5725.03	473.773	31.2512	3.58618	1.07569e-214	2.69031e-211	Null_Model_OpenChrom	human
Roadmapepigenomics_Histone_narrow	Penis_Foreskin_Melanocyte_Primary_Cells_skin01	H3K4me3	15518	35894	0.432329	3795.2	375.119	31.2509	4.08884	1.08501e-214	2.71362e-211	Null_Model_OpenChrom	human
Roadmapepigenomics_Histone_narrow	H1_BMP4_Derived_Trophoblast_Cultured_Cells	H3K4me3	14778	35894	0.411712	3499.43	360.905	31.2508	4.22298	1.08974e-214	2.72544e-211	Null_Model_OpenChrom	human
Roadmapepigenomics_ActiveChromatin	CD4+_CD25+_CD127-_Treg_Primary	ActiveChromatin	20441	35894	0.569482	6059.65	460.193	31.2507	3.3733	1.09265e-214	2.73271e-211	Null_Model_OpenChrom	human
Roadmapepigenomics_ActiveChromatin	CD4+_CD25-_CD45RA+_Naive_Primary	3_TxFlnk	5756	35894	0.160361	632.771	163.941	31.2505	9.09649	1.10058e-214	2.75255e-211	Null_Model_OpenChrom	human
Roadmapepigenomics_Histone_narrow	CD4+_CD25+_CD127-_Treg_Primary_CellsTh	H3K27ac	16427	35894	0.457653	4164.51	392.398	31.2502	3.94452	1.11102e-214	2.77865e-211	Null_Model_OpenChrom	human
Roadmapepigenomics_Dnase_narrow	CD14_Primary_Cells	Dnase	21160	35894	0.589514	6017.62	484.563	31.2495	3.51634	1.13298e-214	2.83359e-211	Null_Model_OpenChrom	human
Roadmapepigenomics_Histone_narrow	Lung	H3K4me3	14605	35894	0.406893	3319.61	361.159	31.2477	4.39961	1.19988e-214	3.0009e-211	Null_Model_OpenChrom	human
GSE62742_Histone	GM19159	H3K27AC	19726	35894	0.549563	5532.8	454.224	31.2472	3.56528	1.22031e-214	3.05199e-211	Null_Model_OpenChrom	human
Roadmapepigenomics_ActiveChromatin	Peripheral_Blood_Mononuclear_Primary	ActiveChromatin	19063	35894	0.531092	5173.82	444.512	31.2459	3.68451	1.26947e-214	3.17495e-211	Null_Model_OpenChrom	human
GSE62742_Histone	GM18856	H3K27AC	20316	35894	0.566	5722	467.073	31.2456	3.55051	1.279e-214	3.19878e-211	Null_Model_OpenChrom	human
Roadmapepigenomics_Histone_narrow	Breast_vHMEC	H3K4me3	13776	35894	0.383797	2976.57	345.634	31.2453	4.62814	1.29265e-214	3.23291e-211	Null_Model_OpenChrom	human
Roadmapepigenomics_Histone_narrow	NHLF_Lung_Fibroblasts	H3K9ac	13907	35894	0.387446	3122.95	345.143	31.2451	4.45317	1.2993e-214	3.24954e-211	Null_Model_OpenChrom	human
Roadmapepigenomics_Histone_narrow	CD8_Naive_Primary_Cells	H3K9ac	13594	35894	0.378726	2886.31	342.708	31.2444	4.70982	1.33105e-214	3.32894e-211	Null_Model_OpenChrom	human
Roadmapepigenomics_ActiveChromatin	CD4+_CD25-_Th_Primary	2_TssAFlnk	12825	35894	0.357302	2473.6	331.309	31.2439	5.18474	1.35091e-214	3.37863e-211	Null_Model_OpenChrom	human
GSE62742_Histone	GM18523	H3K27AC	19233	35894	0.535828	5213.23	448.728	31.2434	3.68927	1.37348e-214	3.43507e-211	Null_Model_OpenChrom	human
Roadmapepigenomics_Histone_narrow	H9_Derived_Neuronal_Progenitor_Cultured_Cells	H3K4me3	14396	35894	0.40107	3267.69	356.188	31.2428	4.40556	1.39701e-214	3.49391e-211	Null_Model_OpenChrom	human
Roadmapepigenomics_Histone_narrow	CD3_Primary_Cells_Peripheral_UWUW	H3K27ac	16382	35894	0.456399	4074.65	393.931	31.2424	4.02047	1.41429e-214	3.53713e-211	Null_Model_OpenChrom	human
Roadmapepigenomics_Histone_narrow	Fetal_Kidney	H3K9ac	13006	35894	0.362345	2695.35	330.025	31.242	4.82535	1.43205e-214	3.58156e-211	Null_Model_OpenChrom	human
GSE62742_Histone	GM19190	H3K27AC	20355	35894	0.567086	5699.45	469.12	31.2405	3.57139	1.50248e-214	3.75771e-211	Null_Model_OpenChrom	human
Roadmapepigenomics_Histone_narrow	Stomach_Mucosa	H3K4me3	14397	35894	0.401098	3276.84	355.964	31.2396	4.39357	1.54718e-214	3.86949e-211	Null_Model_OpenChrom	human
Roadmapepigenomics_Histone_narrow	Rectal_Mucosa.Donor_31	H3K4me3	17378	35894	0.484148	4627.47	408.154	31.2395	3.7554	1.54834e-214	3.87239e-211	Null_Model_OpenChrom	human
Roadmapepigenomics_Histone_narrow	Penis_Foreskin_Melanocyte_Primary_Cells_skin03	H3K4me3	15490	35894	0.431548	3649.16	379.041	31.239	4.24481	1.57613e-214	3.9419e-211	Null_Model_OpenChrom	human
Roadmapepigenomics_Dnase_narrow	CD3_Primary_Cells_Peripheral_UWUW	Dnase	22864	35894	0.636987	7740.96	484.112	31.2387	2.95364	1.58854e-214	3.97293e-211	Null_Model_OpenChrom	human
DNaseI_Duke	K562+G1_phase	Dnase	18950	35894	0.527943	5536.52	429.391	31.2384	3.42273	1.60575e-214	4.01598e-211	Null_Model_OpenChrom	human
DNaseClusters	PANC-1	Dnase	16061	35894	0.447456	4011.28	385.741	31.2379	4.00396	1.63185e-214	4.08127e-211	Null_Model_OpenChrom	human
Roadmapepigenomics_ActiveChromatin	CD14_Primary	2_TssAFlnk	9397	35894	0.261799	1705.59	246.226	31.2372	5.50954	1.66826e-214	4.17232e-211	Null_Model_OpenChrom	human
DNaseClusters	HMVEC-LLy	Dnase	17833	35894	0.496824	4906.67	413.858	31.2337	3.63444	1.85562e-214	4.64091e-211	Null_Model_OpenChrom	human
DNaseClusters	HSMM_emb	Dnase	18156	35894	0.505823	4802.43	427.552	31.2326	3.78058	1.92212e-214	4.80722e-211	Null_Model_OpenChrom	human
Roadmapepigenomics_Histone_narrow	IMR90_Cell_Line	H3K4me3	15345	35894	0.427509	3578.02	376.762	31.2319	4.28868	1.96808e-214	4.92217e-211	Null_Model_OpenChrom	human
Roadmapepigenomics_Histone_narrow	Gastric	H3K4me3	15083	35894	0.42021	3486.54	371.304	31.2317	4.32606	1.97665e-214	4.94361e-211	Null_Model_OpenChrom	human
Roadmapepigenomics_ActiveChromatin	CD56_Primary	ActiveChromatin	22750	35894	0.633811	7532.54	487.25	31.2313	3.02023	2.00099e-214	5.00448e-211	Null_Model_OpenChrom	human
Roadmapepigenomics_Histone_narrow	H9_Cell_Line	H3K4me3	15525	35894	0.432524	3846.51	373.938	31.2311	4.03613	2.01405e-214	5.03715e-211	Null_Model_OpenChrom	human
DNaseClusters	HMVEC-dLy-Ad	Dnase	17169	35894	0.478325	4371.09	409.787	31.2306	3.92785	2.04742e-214	5.12059e-211	Null_Model_OpenChrom	human
GSE62742_Histone	GM19238	H3K27AC	20110	35894	0.560261	5732.6	460.37	31.2301	3.50801	2.08199e-214	5.20707e-211	Null_Model_OpenChrom	human
Roadmapepigenomics_Histone_narrow	Rectal_Mucosa.Donor_29	H3K4me3	19063	35894	0.531092	5372.42	438.397	31.2288	3.54831	2.16897e-214	5.42459e-211	Null_Model_OpenChrom	human
Roadmapepigenomics_Dnase_narrow	Mobilized_CD34_Primary_Cells_Female	Dnase	24554	35894	0.68407	8518.45	513.489	31.2286	2.88245	2.18041e-214	5.4532e-211	Null_Model_OpenChrom	human
Roadmapepigenomics_Histone_narrow	H1_Cell_Line	H3K4me3	15177	35894	0.422828	3702.73	367.43	31.2284	4.09887	2.19062e-214	5.47875e-211	Null_Model_OpenChrom	human
Roadmapepigenomics_ActiveChromatin	Fetal_Brain_Male	1_TssA	8185	35894	0.228033	1283.36	221.016	31.2268	6.37781	2.30262e-214	5.75884e-211	Null_Model_OpenChrom	human
Roadmapepigenomics_Histone_narrow	Neurosphere_Cultured_Cells_Cortex_Derived	H3K4me3	15150	35894	0.422076	3635.43	368.764	31.2248	4.16732	2.45718e-214	6.1454e-211	Null_Model_OpenChrom	human
Roadmapepigenomics_Histone_narrow	H1_Derived_Neuronal_Progenitor_Cultured_Cells	H3K4me3	14570	35894	0.405917	3451.2	356.089	31.2248	4.22172	2.45841e-214	6.14848e-211	Null_Model_OpenChrom	human
Roadmapepigenomics_ActiveChromatin	CD15_Primary	2_TssAFlnk	12323	35894	0.343316	2490.87	314.903	31.2228	4.94728	2.61532e-214	6.54092e-211	Null_Model_OpenChrom	human
Roadmapepigenomics_Histone_narrow	K562_Leukemia	H3K4me3	15045	35894	0.419151	3653.49	364.851	31.2224	4.11798	2.64973e-214	6.62699e-211	Null_Model_OpenChrom	human
DNaseClusters	HeLa-S3+IFNa4h	Dnase	16166	35894	0.450382	4005.37	389.49	31.222	4.03608	2.6823e-214	6.70843e-211	Null_Model_OpenChrom	human
Roadmapepigenomics_Histone_narrow	Monocytes-CD14+_RO01746	H3K9ac	17208	35894	0.479412	4567.7	404.855	31.2218	3.76732	2.69723e-214	6.74576e-211	Null_Model_OpenChrom	human
Roadmapepigenomics_Histone_narrow	Thymus	H3K27ac	17230	35894	0.480025	4475.29	408.536	31.2205	3.85003	2.80742e-214	7.02136e-211	Null_Model_OpenChrom	human
Roadmapepigenomics_Histone_narrow	Mobilized_CD34_Primary_Cells_Male	H3K4me3	19678	35894	0.548225	5654.7	449.171	31.2204	3.47994	2.814e-214	7.03783e-211	Null_Model_OpenChrom	human
Roadmapepigenomics_ActiveChromatin	Thymus	ActiveChromatin	20248	35894	0.564105	5796.89	462.876	31.2202	3.49291	2.83123e-214	7.08092e-211	Null_Model_OpenChrom	human
DNaseClusters	HTR8svn	Dnase	17433	35894	0.48568	4618.33	410.464	31.22	3.77474	2.85326e-214	7.13601e-211	Null_Model_OpenChrom	human
DNaseClusters	HMVEC-dNeo	Dnase	18150	35894	0.505656	4926.74	423.558	31.2195	3.68398	2.89836e-214	7.24879e-211	Null_Model_OpenChrom	human
DNaseI_Duke	Ishikawa+4OHTAM_100nM_30m	Dnase	19087	35894	0.53176	5567.81	433.048	31.2187	3.4281	2.97313e-214	7.4358e-211	Null_Model_OpenChrom	human
Roadmapepigenomics_Histone_narrow	Monocytes-CD14+_RO01746	H3K4me3	19256	35894	0.536468	5590.05	437.751	31.2185	3.44469	2.9854e-214	7.46648e-211	Null_Model_OpenChrom	human
DNaseI_Duke	K562+SAHA_1uM_72hr	Dnase	19708	35894	0.549061	5992.35	439.344	31.2185	3.28886	2.99188e-214	7.48269e-211	Null_Model_OpenChrom	human
Roadmapepigenomics_Histone_narrow	HUVEC_Umbilical_Vein_Endothelial_Cells	H3K4me3	14935	35894	0.416086	3661.83	361.114	31.2178	4.07856	3.05716e-214	7.64597e-211	Null_Model_OpenChrom	human
Roadmapepigenomics_Histone_narrow	hESC_Derived_CD56+_Mesoderm_Cultured_Cells	H3K4me3	14714	35894	0.409929	3449.39	360.842	31.2176	4.26568	3.076e-214	7.69308e-211	Null_Model_OpenChrom	human
Roadmapepigenomics_Histone_narrow	H1_BMP4_Derived_Mesendoderm_Cultured_Cells	H3K4me2	13069	35894	0.3641	2861.49	326.982	31.2173	4.5672	3.10247e-214	7.75927e-211	Null_Model_OpenChrom	human
Roadmapepigenomics_ActiveChromatin	CD34	2_TssAFlnk	11816	35894	0.329192	2474.93	299.228	31.2173	4.77428	3.10518e-214	7.76606e-211	Null_Model_OpenChrom	human
DNaseClusters	HPDE6-E6E7	Dnase	17663	35894	0.492088	4865.65	409.949	31.2169	3.63015	3.13717e-214	7.84605e-211	Null_Model_OpenChrom	human
Roadmapepigenomics_ActiveChromatin	CD4+_CD25+_CD127-_Treg_Primary	2_TssAFlnk	11066	35894	0.308297	2189.55	284.368	31.2147	5.05402	3.36937e-214	8.4268e-211	Null_Model_OpenChrom	human
Roadmapepigenomics_Histone_narrow	Ovary	H3K4me3	14602	35894	0.406809	3394.82	359.046	31.2138	4.30126	3.46691e-214	8.67075e-211	Null_Model_OpenChrom	human
Roadmapepigenomics_Histone_narrow	Colonic_Mucosa	H3K4me3	17761	35894	0.494818	4832.55	414.191	31.2137	3.67528	3.47055e-214	8.67986e-211	Null_Model_OpenChrom	human
Roadmapepigenomics_Histone_narrow	CD4+_CD25-_CD45RA+_Naive_Primary_Cellsd_	H3K27ac	16755	35894	0.466791	4228.27	401.326	31.2133	3.96261	3.51364e-214	8.7876e-211	Null_Model_OpenChrom	human
Roadmapepigenomics_Histone_narrow	4star	H3K4me3	14876	35894	0.414443	3565.69	362.359	31.213	4.17199	3.54905e-214	8.87618e-211	Null_Model_OpenChrom	human
Roadmapepigenomics_Histone_narrow	H1_BMP4_Derived_Trophoblast_Cultured_Cells	H3K4me2	14967	35894	0.416978	3580.23	364.81	31.2129	4.18046	3.5584e-214	8.89956e-211	Null_Model_OpenChrom	human
Roadmapepigenomics_Histone_narrow	Peripheral_Blood_Mononuclear_Primary_Cells	H3K9ac	18176	35894	0.50638	5172.25	416.621	31.2124	3.51413	3.61552e-214	9.04242e-211	Null_Model_OpenChrom	human
Roadmapepigenomics_Histone_narrow	Brain_Germinal_Matrix	H3K4me3	15278	35894	0.425642	3843.04	366.369	31.2116	3.9755	3.70761e-214	9.27273e-211	Null_Model_OpenChrom	human
Roadmapepigenomics_Histone_narrow	CD8_Memory_Primary_Cells	H3K27ac	15456	35894	0.430601	3704.43	376.53	31.2102	4.1723	3.87052e-214	9.68017e-211	Null_Model_OpenChrom	human
Roadmapepigenomics_Histone_narrow	Right_Ventricle	H3K4me3	15672	35894	0.436619	3924.64	376.395	31.2102	3.99324	3.87762e-214	9.69793e-211	Null_Model_OpenChrom	human
Roadmapepigenomics_Histone_narrow	Peripheral_Blood_Mononuclear_Primary_Cells	H3K4me1	16451	35894	0.458322	4375.17	386.924	31.2098	3.76008	3.91632e-214	9.79472e-211	Null_Model_OpenChrom	human
Roadmapepigenomics_Histone_narrow	Right_Atrium	H3K4me3	15369	35894	0.428177	3692.87	374.12	31.2096	4.1618	3.9472e-214	9.87196e-211	Null_Model_OpenChrom	human
Roadmapepigenomics_Histone_narrow	Monocytes-CD14+_RO01746	H3K4me2	20036	35894	0.558199	6054.87	448.009	31.2073	3.30907	4.24718e-214	1.06222e-210	Null_Model_OpenChrom	human
Roadmapepigenomics_ActiveChromatin	CD4+_CD25-_CD45RO+_Memory_Primary	ActiveChromatin	20157	35894	0.56157	6368.68	441.841	31.2065	3.16502	4.35048e-214	1.08806e-210	Null_Model_OpenChrom	human
GSE62742_Histone	GM19200	H3K27AC	19651	35894	0.547473	5920.05	440.018	31.2054	3.3194	4.49924e-214	1.12526e-210	Null_Model_OpenChrom	human
Roadmapepigenomics_Histone_narrow	CD4_Memory_Primary_Cells	H3K27ac	16967	35894	0.472697	4558.44	397.643	31.2052	3.72211	4.52186e-214	1.13092e-210	Null_Model_OpenChrom	human
Roadmapepigenomics_ActiveChromatin	CD4+_CD25-_CD45RA+_Naive_Primary	ActiveChromatin	21027	35894	0.585808	7008.96	449.242	31.2038	3.00002	4.73111e-214	1.18325e-210	Null_Model_OpenChrom	human
Roadmapepigenomics_Histone_narrow	Duodenum_Mucosa	H3K9ac	16929	35894	0.471639	4606.76	394.905	31.2031	3.67482	4.83971e-214	1.21041e-210	Null_Model_OpenChrom	human
Roadmapepigenomics_Histone_narrow	Fetal_Stomach	H3K4me3	15361	35894	0.427955	3549.25	378.546	31.203	4.32795	4.8552e-214	1.21429e-210	Null_Model_OpenChrom	human
Roadmapepigenomics_Histone_narrow	Fetal_Brain_Female	H3K4me3	15401	35894	0.429069	4054.23	363.65	31.2024	3.79875	4.94229e-214	1.23607e-210	Null_Model_OpenChrom	human
Roadmapepigenomics_Histone_narrow	NHDF-Ad_Adult_Dermal_Fibroblasts	H2A.Z	13916	35894	0.387697	3216.78	342.908	31.2014	4.32607	5.09374e-214	1.27394e-210	Null_Model_OpenChrom	human
DNaseI_Duke	ECC-1+DMSO_0.02pct	Dnase	19027	35894	0.530089	5705.26	426.964	31.201	3.33499	5.15645e-214	1.28963e-210	Null_Model_OpenChrom	human
Roadmapepigenomics_Histone_narrow	Adult_Liver	H3K4me3	15495	35894	0.431688	3876.8	372.367	31.2009	3.99685	5.17559e-214	1.29442e-210	Null_Model_OpenChrom	human
DNaseI_Duke	Adult_CD4_Th0	Dnase	21599	35894	0.601744	6859.96	472.393	31.2008	3.14856	5.19779e-214	1.29997e-210	Null_Model_OpenChrom	human
Roadmapepigenomics_Histone_narrow	NHDF-Ad_Adult_Dermal_Fibroblasts	H3K4me3	13897	35894	0.387168	3228.18	341.953	31.1996	4.3049	5.38957e-214	1.34793e-210	Null_Model_OpenChrom	human
DNaseClusters	HPAEC	Dnase	16682	35894	0.464757	4320.84	396.203	31.199	3.86082	5.4911e-214	1.37332e-210	Null_Model_OpenChrom	human
Roadmapepigenomics_Histone_narrow	Rectal_Mucosa.Donor_29	H3K9ac	16621	35894	0.463058	4345.96	393.452	31.1983	3.82447	5.6212e-214	1.40586e-210	Null_Model_OpenChrom	human
Roadmapepigenomics_Histone_narrow	hESC_Derived_CD56+_Ectoderm_Cultured_Cells	H3K4me3	15164	35894	0.422466	3771.57	365.167	31.1978	4.02061	5.69781e-214	1.42502e-210	Null_Model_OpenChrom	human
DNaseI_Duke	MCF7+Randomized_shRNA_control	Dnase	18836	35894	0.524767	5706.99	420.839	31.1972	3.30052	5.8111e-214	1.45336e-210	Null_Model_OpenChrom	human
DNaseClusters	LNCaP+androgen	Dnase	17697	35894	0.493035	5107.44	403.557	31.1965	3.46495	5.94606e-214	1.48711e-210	Null_Model_OpenChrom	human
Roadmapepigenomics_Histone_narrow	HSMM_Skeletal_Muscle_Myoblasts	H3K4me3	15326	35894	0.426979	3838.12	368.263	31.1947	3.9931	6.27911e-214	1.5704e-210	Null_Model_OpenChrom	human
DNaseI_Duke	K562+G2-M_phase	Dnase	18734	35894	0.521926	5450.09	425.842	31.1945	3.43737	6.32964e-214	1.58304e-210	Null_Model_OpenChrom	human
Roadmapepigenomics_ActiveChromatin	Fetal_Muscle_Leg	1_TssA	6093	35894	0.16975	825.501	168.862	31.1942	7.38097	6.39309e-214	1.59891e-210	Null_Model_OpenChrom	human
Roadmapepigenomics_Histone_narrow	H9_Derived_Neuron_Cultured_Cells	H3K4me3	14351	35894	0.399816	3347.11	352.759	31.1938	4.28757	6.46331e-214	1.61647e-210	Null_Model_OpenChrom	human
DNaseClusters	Caco-2	Dnase	16568	35894	0.461581	4425.8	389.258	31.1932	3.7435	6.58965e-214	1.64807e-210	Null_Model_OpenChrom	human
Roadmapepigenomics_Histone_narrow	HUES48_Cell_Line	H3K9ac	12989	35894	0.361871	3120.81	316.358	31.1931	4.16207	6.60722e-214	1.65247e-210	Null_Model_OpenChrom	human
Roadmapepigenomics_Histone_narrow	Duodenum_Mucosa	H3K4me3	18952	35894	0.527999	5474.09	432.092	31.1922	3.46213	6.78775e-214	1.69762e-210	Null_Model_OpenChrom	human
Roadmapepigenomics_Histone_narrow	Rectal_Smooth_Muscle	H3K4me3	17815	35894	0.496323	5196.25	404.549	31.1921	3.42844	6.8101e-214	1.70321e-210	Null_Model_OpenChrom	human
Roadmapepigenomics_Dnase_narrow	Fetal_Thymus	Dnase	25081	35894	0.698752	9075.36	513.135	31.1919	2.76364	6.87096e-214	1.71843e-210	Null_Model_OpenChrom	human
Roadmapepigenomics_ActiveChromatin	CD8_Naive_Primary	ActiveChromatin	20728	35894	0.577478	6694.14	449.921	31.1918	3.09644	6.87234e-214	1.71877e-210	Null_Model_OpenChrom	human
Roadmapepigenomics_ActiveChromatin	CD4+_CD25-_IL17+_PMA-Ionomcyin_stimulated_Th17_Primary	ActiveChromatin	20835	35894	0.580459	6808.98	449.672	31.1916	3.05993	6.91498e-214	1.72944e-210	Null_Model_OpenChrom	human
DNaseClusters	HEK293T	Dnase	18963	35894	0.528306	5801.97	421.961	31.1902	3.26838	7.24503e-214	1.81198e-210	Null_Model_OpenChrom	human
DNaseClusters	K562	Dnase	19590	35894	0.545774	6223.44	428.567	31.189	3.14778	7.51637e-214	1.87984e-210	Null_Model_OpenChrom	human
DNaseI_Duke	Ishikawa+Estradiol_10nM_30m	Dnase	18886	35894	0.52616	5433.13	431.341	31.1885	3.47608	7.63825e-214	1.91033e-210	Null_Model_OpenChrom	human
Roadmapepigenomics_Histone_narrow	CD14_Primary_Cells	H3K27ac	14272	35894	0.397615	3520.09	344.743	31.1882	4.05444	7.71039e-214	1.92837e-210	Null_Model_OpenChrom	human
Roadmapepigenomics_Histone_narrow	CD19_Primary_Cells_Peripheral_UW	H3K4me1	22704	35894	0.632529	7865.1	475.794	31.1876	2.88668	7.83654e-214	1.95992e-210	Null_Model_OpenChrom	human
Roadmapepigenomics_ActiveChromatin	CD4_Naive_Primary	ActiveChromatin	20157	35894	0.56157	6369	442.125	31.1858	3.16486	8.30813e-214	2.07786e-210	Null_Model_OpenChrom	human
Roadmapepigenomics_Histone_narrow	K562_Leukemia	H3K9ac	13832	35894	0.385357	3300.36	337.717	31.1848	4.19106	8.55033e-214	2.13844e-210	Null_Model_OpenChrom	human
DNaseI_Duke	K562+SAHA_ctrl	Dnase	20264	35894	0.564551	6504.2	441.242	31.1843	3.11553	8.70916e-214	2.17816e-210	Null_Model_OpenChrom	human
Roadmapepigenomics_ActiveChromatin	CD3_Primary_Cord_BI	ActiveChromatin	20176	35894	0.5621	6568.89	436.35	31.1839	3.07145	8.80444e-214	2.20199e-210	Null_Model_OpenChrom	human
Roadmapepigenomics_Histone_narrow	Fetal_Lung	H3K4me3	14820	35894	0.412882	3815.46	352.895	31.1836	3.88419	8.9024e-214	2.22649e-210	Null_Model_OpenChrom	human
Roadmapepigenomics_Histone_narrow	Fetal_Brain_Male	H3K4me3	9664	35894	0.269237	1786.61	252.635	31.1809	5.40914	9.66903e-214	2.41822e-210	Null_Model_OpenChrom	human
Roadmapepigenomics_Histone_narrow	HepG2_Hepatocellular_Carcinoma	H2A.Z	8020	35894	0.223436	1177.3	219.452	31.1808	6.81222	9.69053e-214	2.4236e-210	Null_Model_OpenChrom	human
DNaseI_Duke	HEK293T	Dnase	18963	35894	0.528306	5804.23	422.075	31.1764	3.2671	1.11394e-213	2.78597e-210	Null_Model_OpenChrom	human
DNaseClusters	H9ES	Dnase	18830	35894	0.5246	5622.08	423.671	31.1749	3.34929	1.16626e-213	2.91682e-210	Null_Model_OpenChrom	human
Roadmapepigenomics_Histone_narrow	H1_Cell_Line	H3K9ac	13751	35894	0.3831	3453.45	330.331	31.1735	3.98182	1.21965e-213	3.05034e-210	Null_Model_OpenChrom	human
DNaseI_Duke	ECC-1+Estradiol_10nM_30m	Dnase	19501	35894	0.543294	5956.85	434.487	31.1728	3.27371	1.24724e-213	3.11934e-210	Null_Model_OpenChrom	human
Roadmapepigenomics_ActiveChromatin	CD8_Memory_Primary	ActiveChromatin	19570	35894	0.545216	6100.72	432.094	31.1721	3.20782	1.27319e-213	3.18424e-210	Null_Model_OpenChrom	human
Roadmapepigenomics_Histone_narrow	hESC_Derived_CD184+_Endoderm_Cultured_Cells	H3K9ac	12970	35894	0.361342	3175.46	314.213	31.1717	4.08445	1.2892e-213	3.22429e-210	Null_Model_OpenChrom	human
DNaseClusters	BE2_C	Dnase	18042	35894	0.502647	5325.48	407.968	31.1704	3.38786	1.34323e-213	3.35942e-210	Null_Model_OpenChrom	human
Roadmapepigenomics_ActiveChromatin	CD4_Memory_Primary	ActiveChromatin	20249	35894	0.564133	6698.32	434.735	31.17	3.023	1.36077e-213	3.40329e-210	Null_Model_OpenChrom	human
Roadmapepigenomics_Histone_narrow	Brain_Cingulate_Gyrus	H3K4me3	16635	35894	0.463448	4787.87	380.083	31.1699	3.47441	1.3635e-213	3.4101e-210	Null_Model_OpenChrom	human
Roadmapepigenomics_Histone_narrow	iPS_DF_19.11_Cell_Line	H3K4me3	15432	35894	0.429933	4074.98	364.378	31.1682	3.78701	1.43743e-213	3.59502e-210	Null_Model_OpenChrom	human
DNaseClusters	RWPE1	Dnase	17806	35894	0.496072	5352.8	399.554	31.1678	3.32648	1.45671e-213	3.64324e-210	Null_Model_OpenChrom	human
DNaseClusters	HepG2	Dnase	19471	35894	0.542458	6402.49	419.331	31.1651	3.04116	1.58324e-213	3.95968e-210	Null_Model_OpenChrom	human
Roadmapepigenomics_Histone_narrow	Breast_Myoepithelial_Cells	H3K4me3	15823	35894	0.440826	4347.82	368.212	31.1646	3.6393	1.60767e-213	4.02078e-210	Null_Model_OpenChrom	human
DNaseI_Duke	GM12891	Dnase	24390	35894	0.679501	9141.86	489.28	31.1645	2.66795	1.61543e-213	4.04018e-210	Null_Model_OpenChrom	human
DNaseClusters	Huh-7	Dnase	18105	35894	0.504402	5234.93	412.977	31.1642	3.4585	1.63073e-213	4.07847e-210	Null_Model_OpenChrom	human
Roadmapepigenomics_Histone_narrow	Monocytes-CD14+_RO01746	H2A.Z	18428	35894	0.513401	5726.46	407.599	31.1618	3.21805	1.75307e-213	4.38443e-210	Null_Model_OpenChrom	human
DNaseI_Duke	K562	Dnase	19324	35894	0.538363	5964.89	428.705	31.1615	3.23963	1.77058e-213	4.42822e-210	Null_Model_OpenChrom	human
Roadmapepigenomics_Histone_narrow	K562_Leukemia	H3K4me2	16723	35894	0.4659	4793.62	382.828	31.1612	3.4886	1.78818e-213	4.47223e-210	Null_Model_OpenChrom	human
Roadmapepigenomics_Histone_narrow	Penis_Foreskin_Keratinocyte_Primary_Cells_skin02	H3K4me3	15933	35894	0.44389	4232.69	375.481	31.1609	3.76427	1.80666e-213	4.51845e-210	Null_Model_OpenChrom	human
Roadmapepigenomics_Histone_narrow	iPS-18_Cell_Line	H3K9ac	14318	35894	0.398897	3811.91	337.158	31.1608	3.75612	1.81357e-213	4.53574e-210	Null_Model_OpenChrom	human
Roadmapepigenomics_Histone_narrow	ES-I3_Cell_Line	H3K9ac	16402	35894	0.456957	4726.08	374.706	31.1603	3.47053	1.84202e-213	4.6069e-210	Null_Model_OpenChrom	human
DNaseI_Duke	Adult_CD4_Th1	Dnase	21321	35894	0.593999	7314.6	449.508	31.1594	2.91486	1.889e-213	4.7244e-210	Null_Model_OpenChrom	human
DNaseI_Duke	HepG2	Dnase	19297	35894	0.537611	6282.34	417.682	31.1592	3.07163	1.90129e-213	4.75512e-210	Null_Model_OpenChrom	human
DNaseClusters	NT2-D1	Dnase	18494	35894	0.515239	5879.79	404.847	31.158	3.14535	1.97872e-213	4.94878e-210	Null_Model_OpenChrom	human
DNaseI_Duke	MCF7+CTCF_shRNA_knockdown	Dnase	17357	35894	0.483563	5086.2	393.828	31.1578	3.41257	1.99084e-213	4.97908e-210	Null_Model_OpenChrom	human
Roadmapepigenomics_Histone_narrow	Brain_Angular_Gyrus	H3K4me3	16097	35894	0.448459	4383.66	375.941	31.1574	3.67205	2.01339e-213	5.03548e-210	Null_Model_OpenChrom	human
DNaseClusters	A549	Dnase	18352	35894	0.511283	5721.88	405.369	31.1571	3.20734	2.03388e-213	5.08674e-210	Null_Model_OpenChrom	human
Roadmapepigenomics_Histone_narrow	HepG2_Hepatocellular_Carcinoma	H3K4me3	15866	35894	0.442024	4484.81	365.306	31.1553	3.53772	2.15225e-213	5.38277e-210	Null_Model_OpenChrom	human
Roadmapepigenomics_Histone_narrow	Penis_Foreskin_Keratinocyte_Primary_Cells_skin03	H3K4me3	16286	35894	0.453725	4626.97	374.225	31.1552	3.5198	2.15879e-213	5.39913e-210	Null_Model_OpenChrom	human
DNaseI_Duke	Urothelia	Dnase	18047	35894	0.502786	5584.97	400.011	31.1542	3.23135	2.22374e-213	5.56157e-210	Null_Model_OpenChrom	human
Roadmapepigenomics_Histone_narrow	Neurosphere_Cultured_Cells_Ganglionic_Eminence_Derived	H3K4me3	15922	35894	0.443584	4532.09	365.604	31.1537	3.51317	2.25852e-213	5.64857e-210	Null_Model_OpenChrom	human
Roadmapepigenomics_Dnase_narrow	Fetal_Intestine_Small	Dnase	18720	35894	0.521536	5765.09	415.845	31.1533	3.24713	2.29137e-213	5.73071e-210	Null_Model_OpenChrom	human
Roadmapepigenomics_Histone_narrow	ES-WA7_Cell_Line	H3K4me3	13631	35894	0.379757	3430.74	327.424	31.1531	3.97319	2.30527e-213	5.76549e-210	Null_Model_OpenChrom	human
Roadmapepigenomics_Histone_narrow	Duodenum_Smooth_Muscle	H3K4me3	17162	35894	0.47813	5080.7	387.82	31.1518	3.37788	2.39696e-213	5.9948e-210	Null_Model_OpenChrom	human
Roadmapepigenomics_Histone_narrow	Rectal_Smooth_Muscle	H3K9ac	14163	35894	0.394578	3573.77	339.928	31.1514	3.96304	2.42592e-213	6.06723e-210	Null_Model_OpenChrom	human
Roadmapepigenomics_Histone_narrow	IMR90_Cell_Line	H2A.Z	16239	35894	0.452415	4647.03	372.119	31.1513	3.49449	2.43666e-213	6.09409e-210	Null_Model_OpenChrom	human
Roadmapepigenomics_ActiveChromatin	CD4+_CD25-_Th_Primary	ActiveChromatin	21366	35894	0.595253	7363.9	449.489	31.1512	2.90145	2.44421e-213	6.11296e-210	Null_Model_OpenChrom	human
Roadmapepigenomics_ActiveChromatin	CD3_Primary_Peripheral_UW	ActiveChromatin	22269	35894	0.62041	7762.97	465.675	31.1505	2.86862	2.49532e-213	6.24079e-210	Null_Model_OpenChrom	human
DNaseClusters	T-47D	Dnase	17362	35894	0.483702	5126.52	392.792	31.15	3.3867	2.53378e-213	6.33699e-210	Null_Model_OpenChrom	human
Roadmapepigenomics_Histone_narrow	H1_BMP4_Derived_Trophoblast_Cultured_Cells	H3K9ac	9586	35894	0.267064	1876.69	247.494	31.1495	5.10793	2.57799e-213	6.44755e-210	Null_Model_OpenChrom	human
Roadmapepigenomics_Histone_narrow	Adipose_Nuclei	H3K4me3	17345	35894	0.483228	5069.63	394.081	31.1494	3.42136	2.58687e-213	6.46977e-210	Null_Model_OpenChrom	human
DNaseClusters	HMVEC-dLy-Neo	Dnase	18151	35894	0.505683	5321.59	411.888	31.1478	3.41082	2.71588e-213	6.79242e-210	Null_Model_OpenChrom	human
Roadmapepigenomics_Histone_narrow	NHLF_Lung_Fibroblasts	H2A.Z	13892	35894	0.387028	3447.59	335.333	31.1463	4.02948	2.8435e-213	7.11159e-210	Null_Model_OpenChrom	human
DNaseClusters	HMVEC-dBl-Ad	Dnase	18004	35894	0.501588	5564.16	399.405	31.146	3.23571	2.87604e-213	7.19297e-210	Null_Model_OpenChrom	human
Roadmapepigenomics_Histone_narrow	Rectal_Mucosa.Donor_31	H3K9ac	17160	35894	0.478074	4918.6	393.038	31.1456	3.4888	2.90805e-213	7.27304e-210	Null_Model_OpenChrom	human
Roadmapepigenomics_Histone_narrow	Colonic_Mucosa	H3K9ac	16741	35894	0.466401	4697.64	386.681	31.1454	3.5637	2.92405e-213	7.31304e-210	Null_Model_OpenChrom	human
Roadmapepigenomics_Histone_narrow	Stomach_Smooth_Muscle	H3K9ac	14184	35894	0.395164	3808.02	333.152	31.1449	3.72477	2.97481e-213	7.44e-210	Null_Model_OpenChrom	human
DNaseI_Duke	MCF7	Dnase	18359	35894	0.511478	5796.61	403.356	31.1447	3.1672	2.99535e-213	7.49138e-210	Null_Model_OpenChrom	human
Roadmapepigenomics_Histone_narrow	Brain_Inferior_Temporal_Lobe	H3K4me3	16730	35894	0.466095	4919.58	379.216	31.1443	3.4007	3.02704e-213	7.57062e-210	Null_Model_OpenChrom	human
Roadmapepigenomics_Histone_narrow	Colon_Smooth_Muscle	H3K4me3	16095	35894	0.448404	4627.66	368.213	31.1432	3.478	3.13135e-213	7.8315e-210	Null_Model_OpenChrom	human
DNaseI_Duke	HPDE6-E6E7	Dnase	18434	35894	0.513568	6052.15	397.613	31.1405	3.04586	3.41483e-213	8.54048e-210	Null_Model_OpenChrom	human
Roadmapepigenomics_Histone_narrow	K562_Leukemia	H2A.Z	15853	35894	0.441662	4474.08	365.423	31.1391	3.5433	3.56503e-213	8.91614e-210	Null_Model_OpenChrom	human
Roadmapepigenomics_ActiveChromatin	CD4+_CD25-_IL17-_PMA-Ionomycin_stimulated_MACS_purified_Th_Primary	ActiveChromatin	21809	35894	0.607595	7814.68	449.434	31.1377	2.79077	3.72468e-213	9.31543e-210	Null_Model_OpenChrom	human
Roadmapepigenomics_Histone_narrow	HeLa-S3_Cervical_Carcinoma	H2A.Z	13988	35894	0.389703	3578.44	334.309	31.1375	3.90897	3.74199e-213	9.35872e-210	Null_Model_OpenChrom	human
DNaseClusters	MCF-7+Hypoxia_LacAcid	Dnase	17691	35894	0.492868	5260.69	399.209	31.1373	3.36287	3.7627e-213	9.41051e-210	Null_Model_OpenChrom	human
Roadmapepigenomics_ActiveChromatin	Dnd41_TCell_Leukemia	ActiveChromatin	17962	35894	0.500418	5369.73	404.415	31.137	3.34505	3.80419e-213	9.51427e-210	Null_Model_OpenChrom	human
Roadmapepigenomics_Histone_narrow	Brain_Substantia_Nigra	H3K4me3	16208	35894	0.451552	4465.98	377.111	31.1367	3.62921	3.83488e-213	9.59105e-210	Null_Model_OpenChrom	human
Roadmapepigenomics_Histone_narrow	K562_Leukemia	H3K27ac	13535	35894	0.377083	3552.74	320.605	31.1357	3.80974	3.96303e-213	9.91155e-210	Null_Model_OpenChrom	human
Roadmapepigenomics_Histone_narrow	iPS-15b_Cell_Line	H3K4me3	16307	35894	0.45431	4836.6	368.405	31.1353	3.37158	4.01192e-213	1.00338e-209	Null_Model_OpenChrom	human
Roadmapepigenomics_Histone_narrow	HUES64_Cell_Line	H3K4me3	15924	35894	0.44364	4446.51	368.636	31.135	3.58124	4.04746e-213	1.01227e-209	Null_Model_OpenChrom	human
[truncated: 1,936 more rows]

## Sheet: Uninfected ATAC Non TF RELI
Track	Cell	Label	Overlap	Total	Ratio	Mean	STD	Z-score	Enrichment	P-val	Corrected P-val	Null_Model	Species
[truncated: 2,451 more rows]
