# Supplementary material for: Epstein-Barr virus nuclear antigen 2 (EBNA2) extensively rewires the human chromatin landscape at autoimmune risk loci
Source: bioRxiv preprint, doi:10.1101/2020.04.15.043612, version 2 (2021-01-27)
Supplement: Supplemental Table S8 [file 043612_file20.xlsx]

## Sheet: README
Epstein-Barr virus nuclear antigen 2 (EBNA2) extensively rewires the human chromatin landscape at autoimmune risk loci
This document contains differential open chromatin regions in Uninfected, EBNA2+ and EBNA2- identified using the Manorm package(PMID: 22424423).
Comments, additions, or subtractions should be addressed to the corresponding authors:
Leah Kottyan (Leah.Kottyan@cchmc.org)
Matt Weirauch (Matthew.Weirauch@cchmc.org)
The first tab contains the results for uninfected vs EBNA2+ conditions, with fold change and p-value information.
The second tab contains the results for uninfected vs EBNA2- conditions, with fold change and p-value information.
The third tab contains the results for EBNA2+ vs EBNA2- conditions, with fold change and p-value information.
The columns in all tabs are the same:
chr	Chromosome
start	peak start postion
end	peak end postion
summit	summit of the peak
M_value	log2 ratio of read density between the two samples
A_value	average log2 read density
P_value	P-value (significance of the difference of the peak between conditions)
Peak_Group	Group to which the peak was assigned, based on comparisons across all three conditions
normalized_read_density	normalized read density in sample 1
normalized_read_density	normalized read density in sample 2

## Sheet: ATAC Uninfected vs EBNA2+
chr	start	end	summit	M_value	A_value	P_value	Peak_Group	normalized_read_density_in_Uninfected	normalized_read_density_in_EBNA2+
chrY	17542	17742	100	2.38243	5.5222	8.41176e-16	Uninfected_unique	104.94	20.1259
chrY	125706	126005	150	1.59084	6.15655	1.1509e-11	Uninfected_unique	123.809	41.1018
chrY	135505	135883	189	3.38728	8.13488	5.2147e-174	Uninfected_unique	909.242	86.8973
chrY	135962	136730	384	3.75138	7.70362	8.49225e-160	Uninfected_unique	764.997	56.8044
chrY	136799	137389	295	3.7695	7.22961	1.60068e-116	Uninfected_unique	554.237	40.6409
chrY	889995	890186	96	1.54356	4.79763	1.98623e-05	Uninfected_unique	47.4853	16.2893
chrY	1365777	1366208	216	1.36963	6.78632	6.25398e-13	Uninfected_unique	177.434	68.6651
chrY	1366578	1366862	142	1.57844	6.71248	9.09405e-16	Uninfected_unique	181.233	60.6847
chrY	1367141	1367338	99	1.66112	6.24818	5.00612e-13	Uninfected_unique	135.18	42.7431
chrY	1394952	1395128	88	2.05689	5.19077	3.67685e-10	Uninfected_unique	74.5024	17.9054
chrY	1603804	1604014	105	-0.05589	7.73975	0.017887	Uninfected_unique	209.645	217.926
chrY	2250566	2250781	108	1.34461	4.75489	0.000167931	Uninfected_unique	43.0277	16.9426
chrY	9944866	9945283	209	0.61515	7.72862	1.05855e-06	Uninfected_unique	262.504	171.379
chrY	9975146	9975329	92	0.29142	7.67454	0.00254845	Uninfected_unique	226.011	184.673
chrY	9984951	9985213	131	0.75919	8.57414	4.97804e-14	Uninfected_unique	495.841	292.957
chrY	9987965	9988219	127	0.50166	8.38409	6.18906e-07	Uninfected_unique	397.53	280.773
chrY	9989940	9990137	99	0.35112	7.59431	0.00118228	Uninfected_unique	218.255	171.106
chrY	10012632	10012825	97	0.81126	7.30411	8.46688e-08	Uninfected_unique	209.345	119.302
chrY	10019164	10019615	226	1.54502	8.38548	4.40819e-44	Uninfected_unique	571.255	195.764
chrY	10019836	10020037	101	1.35964	8.75055	4.20128e-44	Uninfected_unique	689.961	268.863
chrY	10021620	10021814	97	1.43747	8.92873	3.40846e-55	Uninfected_unique	802.004	296.111
chrY	10022375	10022603	114	1.8239	8.48679	9.00259e-65	Uninfected_unique	674.998	190.658
chrY	10023561	10023737	88	1.32212	8.1926	3.0302e-29	Uninfected_unique	462.612	185.02
chrY	10023859	10024158	150	1.32089	8.1463	2.25903e-28	Uninfected_unique	447.811	179.253
chrY	10031327	10031526	100	1.43662	8.5888	5.86006e-44	Uninfected_unique	633.46	234.02
chrY	13241937	13242173	118	0.60116	6.43318	0.000752398	Uninfected_unique	106.43	70.1611
chrY	13269599	13269839	120	0.8255	7.18755	1.86227e-07	Uninfected_unique	194.052	109.501
chrY	13285587	13285775	94	1.04648	7.79153	4.52955e-15	Uninfected_unique	318.416	154.161
chrY	13286128	13286333	103	0.95794	7.96131	2.54242e-14	Uninfected_unique	347.358	178.817
chrY	13291804	13291981	89	1.02636	7.82126	5.53193e-15	Uninfected_unique	322.787	158.472
chrY	13292181	13292383	101	1.01192	7.93476	1.58986e-15	Uninfected_unique	347.464	172.303
chrY	13307331	13307563	116	1.19447	7.22711	1.47112e-13	Uninfected_unique	226.654	99.0356
chrY	13314925	13315120	98	0.93717	7.12855	8.16505e-09	Uninfected_unique	193.627	101.123
chrY	13327928	13328103	88	1.0806	7.11651	6.79704e-11	Uninfected_unique	201.804	95.4193
chrY	13332011	13332203	96	0.96363	6.12825	1.2494e-05	Uninfected_unique	97.685	50.0894
chrY	13346646	13346920	137	1.00657	6.2431	3.07629e-06	Uninfected_unique	107.365	53.4388
chrY	13360095	13360273	89	1.19159	6.18664	1.2863e-07	Uninfected_unique	110.082	48.1961
chrY	13377760	13378087	164	0.69659	6.35828	0.000258324	Uninfected_unique	104.443	64.4445
chrY	13390002	13390233	116	1.05413	5.979	8.59355e-06	Uninfected_unique	90.891	43.772
chrY	13412534	13412732	99	0.72494	7.2165	2.24436e-06	Uninfected_unique	191.204	115.683
chrY	13413042	13413261	110	0.65442	7.18979	1.21874e-05	Uninfected_unique	183.165	116.37
chrY	13420706	13421020	157	0.45956	7.04926	0.000904966	Uninfected_unique	155.314	112.945
chrY	13428734	13429090	178	0.46454	6.78227	0.00171346	Uninfected_unique	129.297	93.7015
chrY	13437192	13437413	111	0.63822	7.01744	4.26823e-05	Uninfected_unique	161.63	103.848
chrY	13504361	13504536	88	0.32635	5.92029	0.0162209	Uninfected_unique	67.8118	54.0834
chrY	19758057	19758240	92	2.242	3.95119	5.1118e-06	Uninfected_unique	33.642	7.11168
chrX	67542	67725	92	2.59586	5.3487	3.59892e-16	Uninfected_unique	100.192	16.5731
chrX	68414	68756	171	0.67878	7.04428	1.53635e-05	Uninfected_unique	166.996	104.321
chrX	175713	175978	133	1.62721	6.21294	1.96221e-12	Uninfected_unique	130.377	42.2048
chrX	176104	176292	94	1.51766	6.236	3.34319e-11	Uninfected_unique	127.542	44.5443
chrX	185627	185910	142	3.26381	8.20917	3.59699e-170	Uninfected_unique	917.189	95.4892
chrX	185957	186762	403	3.43596	7.8676	2.93966e-149	Uninfected_unique	768.329	70.9937
chrX	186799	187394	298	3.52822	7.40904	2.8954e-115	Uninfected_unique	577.289	50.0372
chrX	939986	940186	100	1.46506	5.08684	7.21311e-06	Uninfected_unique	56.4683	20.454
chrX	1415924	1416099	88	1.58262	6.82811	4.26565e-17	Uninfected_unique	196.641	65.6535
chrX	1416574	1416874	150	1.44226	6.77357	3.42802e-14	Uninfected_unique	180.356	66.3691
chrX	1444933	1445112	90	1.17655	5.37462	6.25416e-05	Uninfected_unique	62.375	27.5952
chrX	1576268	1576470	101	0.00748	6.74074	0.0272393	Uninfected_unique	107.224	106.669
chrX	2547685	2547884	100	0.00744	8.54214	0.0145624	Uninfected_unique	373.732	371.81
chrX	2549605	2549790	93	-0.17417	8.42139	0.00448127	Uninfected_unique	322.757	364.172
chrX	3442476	3442916	220	1.40593	6.10792	2.4386e-09	Uninfected_unique	112.274	42.3695
chrX	5566118	5566312	97	-0.12071	6.27345	0.0273411	Uninfected_unique	74.187	80.6613
chrX	6450924	6451152	114	1.52576	5.76441	1.08188e-08	Uninfected_unique	92.238	32.0339
chrX	6654913	6655105	96	-0.16157	6.76146	0.0194237	Uninfected_unique	102.585	114.742
chrX	7027058	7027301	122	-0.15028	7.61128	0.0121026	Uninfected_unique	185.611	205.988
chrX	7526862	7527136	137	1.68773	6.65474	2.60931e-17	Uninfected_unique	180.844	56.1368
chrX	7527349	7527657	154	1.96403	6.50154	1.90153e-20	Uninfected_unique	178.968	45.8715
chrX	9983820	9983996	88	-0.12533	8.45687	0.00759913	Uninfected_unique	336.44	366.974
chrX	12993600	12993775	88	-0.12422	8.674	0.00659746	Uninfected_unique	391.235	426.414
chrX	16965339	16965514	88	0.0208	8.61701	0.0140097	Uninfected_unique	395.466	389.805
chrX	16982775	16983015	120	1.1213	6.58473	1.26756e-08	Uninfected_unique	141.571	65.0772
chrX	16983467	16983647	90	1.00809	6.64912	1.67063e-07	Uninfected_unique	142.337	70.7704
chrX	19771277	19771452	88	0.28535	6.72251	0.00972763	Uninfected_unique	116.581	95.6594
chrX	19774071	19774307	118	0.27614	7.1204	0.00647863	Uninfected_unique	153.115	126.442
chrX	19819393	19819586	97	0.22032	6.75686	0.0139322	Uninfected_unique	116.729	100.197
chrX	19906369	19906556	94	-0.06837	8.39539	0.0127074	Uninfected_unique	328.832	344.79
chrX	24171392	24171580	94	0.13813	6.32393	0.0258118	Uninfected_unique	84.0395	76.3663
chrX	24727250	24727541	146	1.73877	6.49612	1.24202e-16	Uninfected_unique	164.907	49.4101
chrX	24727635	24727840	103	1.7869	6.43492	1.49279e-16	Uninfected_unique	160.716	46.5746
chrX	24727898	24728139	121	1.82918	6.34683	2.08647e-16	Uninfected_unique	153.428	43.1785
chrX	30620565	30620972	204	1.67451	6.70436	1.38039e-17	Uninfected_unique	186.317	58.368
chrX	39942576	39942760	92	1.07864	6.19904	1.33306e-06	Uninfected_unique	106.77	50.5528
chrX	40005777	40005952	88	0.6226	6.91555	8.42404e-05	Uninfected_unique	149.795	97.2921
chrX	41070966	41071216	125	1.13942	5.81775	5.35729e-06	Uninfected_unique	83.7177	38.003
chrX	41471613	41471926	157	1.64741	6.29757	1.93229e-13	Uninfected_unique	139.225	44.4424
chrX	41591021	41591246	113	1.01662	5.71529	5.56827e-05	Uninfected_unique	74.7292	36.9366
chrX	44899665	44899856	96	1.72654	6.68735	4.28142e-18	Uninfected_unique	187.484	56.653
chrX	44900038	44900322	142	1.71904	6.79231	2.19626e-19	Uninfected_unique	201.108	61.0868
chrX	44900382	44900691	155	1.81719	6.64294	1.20373e-19	Uninfected_unique	187.602	53.2365
chrX	46134451	46134663	106	1.58243	6.19168	1.01287e-11	Uninfected_unique	126.491	42.2379
chrX	46135059	46135296	119	1.5776	6.35282	6.99856e-13	Uninfected_unique	141.202	47.3083
chrX	46255342	46255562	110	1.71497	6.32964	9.87471e-15	Uninfected_unique	145.727	44.3898
chrX	46570768	46570943	88	-0.13164	7.44849	0.0147957	Uninfected_unique	166.88	182.824
chrX	47428388	47428592	102	0.69446	6.16902	0.000529413	Uninfected_unique	91.5349	56.5631
chrX	48681499	48681732	117	0.73856	6.26019	0.000195949	Uninfected_unique	99.0078	59.3391
chrX	48803117	48803300	92	0.58372	6.05756	0.00191387	Uninfected_unique	81.5391	54.4062
chrX	49187927	49188104	89	0.93732	6.4599	3.11968e-06	Uninfected_unique	121.816	63.6126
chrX	49296816	49297003	94	0.61814	6.72124	0.000199347	Uninfected_unique	130.718	85.1639
chrX	49306265	49306504	120	0.94151	6.43629	2.56414e-06	Uninfected_unique	120.013	62.4892
chrX	49354387	49354698	156	0.94406	6.64118	7.59085e-07	Uninfected_unique	138.449	71.9613
chrX	49364051	49364226	88	1.23783	6.56394	1.11259e-09	Uninfected_unique	145.296	61.6071
chrX	53469080	53469269	95	0.1658	7.51537	0.0114266	Uninfected_unique	193.779	172.741
chrX	53605311	53605523	106	1.76128	6.9129	5.43702e-22	Uninfected_unique	221.865	65.4472
chrX	53605568	53605752	92	1.86348	6.93695	1.16458e-24	Uninfected_unique	233.729	64.2315
chrX	53605774	53606137	182	1.97735	6.77785	7.33856e-25	Uninfected_unique	217.749	55.2987
chrX	62408101	62408365	132	1.79221	6.42	1.63016e-16	Uninfected_unique	159.356	46.0106
chrX	62408453	62408871	209	1.90262	6.62192	9.2383e-21	Uninfected_unique	190.445	50.9359
chrX	62408957	62409258	151	1.84264	6.71392	4.53343e-21	Uninfected_unique	198.809	55.4302
chrX	67872771	67873002	116	0.86249	6.08025	8.27976e-05	Uninfected_unique	91.2337	50.1788
chrX	69591969	69592187	109	1.5434	6.05226	2.52349e-10	Uninfected_unique	113.297	38.8693
chrX	69899614	69899882	134	1.4051	6.1642	1.23038e-09	Uninfected_unique	116.707	44.0677
chrX	70323131	70323335	102	0.05088	6.45204	0.0293539	Uninfected_unique	89.1078	86.02
chrX	70917284	70917512	114	0.44063	7.15418	0.000813784	Uninfected_unique	165.937	122.265
chrX	71003741	71004019	139	0.14749	7.25612	0.0150155	Uninfected_unique	160.883	145.248
chrX	71526805	71527108	152	0.83868	6.3077	3.6477e-05	Uninfected_unique	105.935	59.2343
chrX	71900853	71901146	147	1.59077	6.42587	2.11828e-13	Uninfected_unique	149.216	49.5387
chrX	71901327	71901541	107	1.73767	6.52781	1.02344e-16	Uninfected_unique	168.505	50.5267
chrX	73386464	73386663	100	1.65413	6.60996	3.64181e-16	Uninfected_unique	173.288	55.0586
chrX	73511840	73512030	95	-0.3359	8.24648	0.000260048	Uninfected_unique	270.321	341.19
chrX	73788535	73788716	91	1.15723	5.91049	1.95967e-06	Uninfected_unique	89.8287	40.2767
chrX	75437462	75437740	139	1.35764	6.91325	5.68897e-14	Uninfected_unique	192.948	75.2923
chrX	75437786	75438511	363	1.37968	7.14678	1.95107e-16	Uninfected_unique	228.59	87.8482
chrX	77187240	77187499	130	1.33412	6.36778	7.22837e-10	Uninfected_unique	131.129	52.0101
chrX	99810472	99810763	146	1.46934	6.19468	1.83347e-10	Uninfected_unique	121.883	44.0176
chrX	99810894	99811080	93	1.34412	6.20734	2.72674e-09	Uninfected_unique	117.735	46.3751
chrX	100227310	100227600	145	1.25865	6.36274	5.08941e-09	Uninfected_unique	127.298	53.2022
chrX	106243264	106243577	157	0.74227	6.44137	0.000101133	Uninfected_unique	112.401	67.1928
chrX	114582013	114582289	138	1.51299	6.54299	1.62758e-13	Uninfected_unique	157.53	55.1961
chrX	118863986	118864161	88	0.50371	6.01959	0.0046427	Uninfected_unique	77.249	54.483
chrX	118892235	118892416	91	0.0558	7.29626	0.0212462	Uninfected_unique	160.248	154.168
chrX	119602064	119602239	88	0.06324	7.96227	0.0158157	Uninfected_unique	254.918	243.985
chrX	123095070	123095257	94	-0.18244	8.72261	0.00261259	Uninfected_unique	396.559	450.015
chrX	125775346	125775606	130	0.86012	6.04613	9.88552e-05	Uninfected_unique	89.0282	49.0462
chrX	131625299	131625492	97	-0.05722	6.23122	0.0314662	Uninfected_unique	73.6498	76.6296
chrX	133972942	133973141	100	1.34412	6.20734	2.72674e-09	Uninfected_unique	117.735	46.3751
chrX	133973720	133973919	100	1.61187	6.18623	6.73916e-12	Uninfected_unique	127.307	41.6515
chrX	135849853	135850125	136	0.45508	6.36385	0.00405168	Uninfected_unique	96.4287	70.3418
chrX	136082022	136082546	262	1.65117	6.50259	3.05411e-15	Uninfected_unique	160.694	51.1621
chrX	136082836	136083101	133	1.59588	6.56767	9.84118e-15	Uninfected_unique	164.919	54.5584
chrX	148502497	148502710	107	0.83036	6.09722	0.000115267	Uninfected_unique	91.2909	51.341
chrX	152973920	152974154	117	1.07002	6.00518	4.67844e-06	Uninfected_unique	93.0665	44.3287
chrX	153249993	153250253	130	0.76984	7.16113	9.87237e-07	Uninfected_unique	186.891	109.608
chrX	153613263	153613438	88	0.94972	6.84056	9.90294e-08	Uninfected_unique	159.28	82.4644
chrX	153714367	153714649	141	0.24758	8.16368	0.00206365	Uninfected_unique	312.447	263.177
chr13	19097240	19097586	173	0.53624	6.68238	0.000721764	Uninfected_unique	123.683	85.2874
chr13	19254722	19254897	88	0.57073	5.45803	0.006988	Uninfected_unique	53.5716	36.0684
chr13	19320456	19320659	102	1.31085	7.06862	2.40692e-14	Uninfected_unique	211.431	85.2244
chr13	19382982	19383157	88	1.30377	7.01819	5.55476e-14	Uninfected_unique	203.668	82.499
chr13	20531891	20532068	89	0.51039	10.1708	1.80388e-18	Uninfected_unique	1375.73	965.81
chr13	20533862	20534078	108	0.38463	9.87246	5.13384e-10	Uninfected_unique	1071.02	820.378
chr13	20617398	20617754	178	1.28621	6.56056	1.96058e-10	Uninfected_unique	147.407	60.441
chr13	21760682	21761017	168	1.30217	6.42829	9.02924e-10	Uninfected_unique	135.24	54.8418
chr13	21834531	21834791	130	0.47681	6.87859	0.00106899	Uninfected_unique	138.813	99.7459
chr13	22022140	22022327	94	1.56725	6.44694	2.78283e-13	Uninfected_unique	150.182	50.679
chr13	22022400	22022575	88	1.53156	6.46148	5.40512e-13	Uninfected_unique	149.838	51.8294
chr13	22249536	22249765	115	-0.07933	7.55181	0.0180062	Uninfected_unique	182.55	192.869
chr13	22299989	22300251	131	0.95047	5.79178	0.000100852	Uninfected_unique	77.0122	39.851
chr13	25592138	25592456	159	0.74847	6.99953	4.83688e-06	Uninfected_unique	165.853	98.7217
chr13	25592499	25592793	147	0.8024	7.04104	1.00904e-06	Uninfected_unique	173.915	99.722
chr13	30844079	30844378	150	1.50559	6.21189	5.69979e-11	Uninfected_unique	124.905	43.9897
chr13	30969044	30969276	116	0.17308	6.96136	0.0161	Uninfected_unique	132.321	117.362
chr13	31003488	31003684	98	0.71881	5.48109	0.00299916	Uninfected_unique	57.3013	34.8162
chr13	31040577	31040772	98	0.06231	8.89209	0.0104856	Uninfected_unique	485.472	464.951
chr13	31413359	31413819	230	1.84387	6.44451	1.13664e-17	Uninfected_unique	165.014	45.9685
chr13	35114461	35114723	131	1.44797	6.14702	6.72507e-10	Uninfected_unique	117.052	42.9038
chr13	36532267	36532444	89	0.37766	5.19347	0.0236838	Uninfected_unique	41.7094	32.1031
chr13	37394001	37394178	89	-0.33503	8.76549	3.52892e-05	Uninfected_unique	387.479	488.768
chr13	40782716	40782996	140	1.354	6.08328	1.07544e-08	Uninfected_unique	108.404	42.4085
chr13	41013171	41013346	88	0.14287	6.86359	0.0201576	Uninfected_unique	122.363	110.826
chr13	41475116	41475512	198	1.45495	7.31057	6.89665e-20	Uninfected_unique	262.841	95.8758
chr13	41529772	41530075	152	1.65049	7.49784	4.75625e-28	Uninfected_unique	320.257	102.012
chr13	41553530	41553729	100	0.33639	8.10124	0.0003711	Uninfected_unique	308.566	244.391
chr13	41554707	41554894	94	0.23863	8.24583	0.00191179	Uninfected_unique	329.731	279.463
chr13	41560729	41560904	88	0.46716	9.04238	1.12432e-08	Uninfected_unique	619.929	448.449
chr13	41568250	41568460	105	0.34058	9.50556	4.19658e-07	Uninfected_unique	817.939	645.946
chr13	42146055	42146290	118	1.92137	6.96442	1.92482e-26	Uninfected_unique	243.049	64.1659
chr13	42226177	42226356	90	0.7986	7.03924	1.28156e-06	Uninfected_unique	173.47	99.7289
chr13	42472642	42472817	88	0.88788	6.80154	6.58665e-07	Uninfected_unique	151.742	82.0027
chr13	42516797	42517081	142	0.88853	6.23199	2.62989e-05	Uninfected_unique	102.271	55.2432
chr13	42999563	42999844	141	0.47438	6.49408	0.00249756	Uninfected_unique	106.246	76.4736
chr13	43267552	43267845	147	0.70003	6.57994	0.000101683	Uninfected_unique	121.934	75.0575
chr13	43990116	43990568	226	0.78105	7.13013	8.07054e-07	Uninfected_unique	183.63	106.862
chr13	46002429	46002631	101	0.3444	7.43828	0.00192249	Uninfected_unique	195.426	153.925
chr13	46059207	46059482	138	1.42887	7.25682	1.04333e-18	Uninfected_unique	250.95	93.2082
chr13	47127769	47127958	95	0.15908	9.83959	0.000578005	Uninfected_unique	968.179	867.097
chr13	47140566	47140755	95	0.15783	6.34385	0.0243696	Uninfected_unique	85.7916	76.9012
chr13	49105065	49105250	93	0.2711	7.32553	0.00550452	Uninfected_unique	176.201	146.016
chr13	49952593	49953336	372	2.3246	6.26697	4.32019e-24	Uninfected_unique	172.359	34.4079
chr13	50336161	50336440	140	1.31567	6.32754	1.74133e-09	Uninfected_unique	126.709	50.9039
chr13	51101023	51101256	117	0.5269	7.50453	4.65581e-05	Uninfected_unique	217.969	151.28
chr13	51172495	51172728	117	-0.2055	7.40061	0.00926541	Uninfected_unique	157.353	181.441
chr13	51640256	51640431	88	0.12258	6.4286	0.0263083	Uninfected_unique	89.8776	82.5565
chr13	53234913	53235105	96	0.9131	6.16797	2.00752e-05	Uninfected_unique	98.6687	52.3973
chr13	67312067	67312246	90	1.11651	5.64559	2.08984e-05	Uninfected_unique	73.7129	33.997
chr13	72916347	72916531	92	-0.06915	7.06422	0.0227706	Uninfected_unique	130.657	137.072
chr13	73425587	73425781	97	0.61471	7.30574	1.70947e-05	Uninfected_unique	195.781	127.857
chr13	73426275	73426566	146	0.70566	7.24743	2.66053e-06	Uninfected_unique	194.047	118.982
chr13	73983961	73984202	121	0.21922	7.51809	0.00717603	Uninfected_unique	197.773	169.893
chr13	74149288	74149583	148	0.97804	7.57265	8.03975e-12	Uninfected_unique	267.18	135.639
chr13	74339760	74339991	116	0.55694	7.98026	1.48232e-06	Uninfected_unique	306.285	208.195
chr13	74488366	74488567	101	0.21709	7.19429	0.0102275	Uninfected_unique	157.896	135.838
chr13	74862861	74863065	102	0.59482	8.54366	1.9204e-09	Uninfected_unique	458.593	303.647
chr13	74919279	74919454	88	0.87949	6.91832	3.29337e-07	Uninfected_unique	164.058	89.1755
chr13	74987663	74987888	113	0.22962	7.6114	0.00593267	Uninfected_unique	211.749	180.592
chr13	75194930	75195150	110	0.09399	7.58084	0.0163471	Uninfected_unique	197.791	185.316
chr13	75282710	75282917	104	0.18477	7.39745	0.0106142	Uninfected_unique	179.748	158.141
chr13	75292470	75292689	110	0.16397	7.82633	0.00889916	Uninfected_unique	240.237	214.427
chr13	75959102	75959483	191	0.32178	7.67636	0.00150778	Uninfected_unique	228.69	182.971
chr13	75969285	75969489	102	0.64661	7.17933	1.82225e-05	Uninfected_unique	181.35	115.843
chr13	75991222	75991402	90	0.64927	9.25217	4.30075e-16	Uninfected_unique	763.67	486.918
chr13	76748122	76748308	93	0.5763	7.60282	8.95943e-06	Uninfected_unique	237.366	159.197
chr13	76764473	76764715	121	0.19441	7.90366	0.00627246	Uninfected_unique	256.154	223.86
chr13	77566949	77567134	93	-0.02542	11.098	0.00511024	Uninfected_unique	2172.7	2211.32
chr13	78743424	78743640	108	-0.14161	7.80433	0.0109865	Uninfected_unique	212.825	234.775
chr13	79450066	79450345	140	-0.15173	8.31158	0.00637903	Uninfected_unique	301.437	334.867
chr13	79693756	79694170	207	0.35638	7.7666	0.000682175	Uninfected_unique	246.388	192.459
chr13	79726479	79726718	120	0.09915	7.24392	0.0187664	Uninfected_unique	156.878	146.458
chr13	80174283	80174497	107	0.26244	7.45387	0.00497227	Uninfected_unique	192.017	160.08
chr13	81064875	81065155	140	-0.01842	7.52332	0.0206698	Uninfected_unique	182.798	185.147
chr13	81253968	81254184	108	-0.22528	7.08995	0.0107794	Uninfected_unique	126.003	147.298
chr13	81281713	81282000	144	0.42081	7.82092	0.000136375	Uninfected_unique	261.619	195.431
chr13	81498059	81498234	88	-0.09412	6.9004	0.0232764	Uninfected_unique	115.627	123.422
chr13	81684915	81685090	88	-0.42289	6.92481	0.00182631	Uninfected_unique	104.936	140.678
chr13	81711866	81712074	104	-0.01136	7.28951	0.0224957	Uninfected_unique	155.83	157.062
chr13	82231936	82232125	95	0.07493	6.96771	0.0234616	Uninfected_unique	128.46	121.958
chr13	82832407	82832667	130	0.35311	7.66572	0.00104738	Uninfected_unique	229.488	179.665
chr13	83166433	83166802	185	0.3971	7.34736	0.00101235	Uninfected_unique	186.872	141.908
chr13	83278444	83278672	114	0.04538	7.18044	0.0227718	Uninfected_unique	147.353	142.79
chr13	83314608	83314783	88	0.35011	7.12402	0.00343314	Uninfected_unique	157.485	123.551
chr13	83344340	83344586	123	0.40922	6.73889	0.00338599	Uninfected_unique	123.084	92.686
chr13	83402925	83403123	99	-0.02265	6.97236	0.0249084	Uninfected_unique	124.589	126.561
chr13	84027481	84027656	88	0.15904	7.82041	0.0094088	Uninfected_unique	238.845	213.914
chr13	84701532	84701789	129	0.05703	7.40411	0.0201462	Uninfected_unique	172.76	166.064
chr13	85501851	85502059	104	0.68573	7.25107	4.30119e-06	Uninfected_unique	193.198	120.109
chr13	85779408	85779613	103	0.55139	7.3928	5.31156e-05	Uninfected_unique	203.445	138.823
chr13	85779653	85779856	102	0.63763	7.40538	6.20627e-06	Uninfected_unique	211.453	135.915
chr13	86427570	86427767	99	0.45527	7.57896	0.000164296	Uninfected_unique	223.882	163.294
chr13	88628576	88628863	144	1.19836	6.22325	7.74936e-08	Uninfected_unique	113.176	49.3189
chr13	89112604	89112793	95	0.12868	6.99969	0.0188214	Uninfected_unique	133.809	122.391
chr13	89274873	89275095	111	0.00805	6.77062	0.0269888	Uninfected_unique	109.489	108.88
chr13	89579197	89579419	111	-0.20557	7.40914	0.00865024	Uninfected_unique	158.282	182.522
chr13	90144458	90144660	101	0.27286	7.45881	0.00454718	Uninfected_unique	193.373	160.05
chr13	90490975	90491206	116	0.22882	6.63595	0.0148935	Uninfected_unique	107.662	91.8712
chr13	90535995	90536205	105	0.33853	7.47533	0.00179571	Uninfected_unique	200.102	158.25
chr13	91519427	91519606	90	-0.35318	7.997	0.000371841	Uninfected_unique	226.036	288.733
chr13	91972217	91972394	89	0.41571	7.19902	0.00102831	Uninfected_unique	169.704	127.219
chr13	92018672	92018981	155	-0.24819	8.21542	0.00184975	Uninfected_unique	272.729	323.925
chr13	93821638	93821832	97	-0.13606	7.16402	0.0175438	Uninfected_unique	136.806	150.336
chr13	95179314	95179511	99	0.81105	7.02119	8.72586e-07	Uninfected_unique	172.054	98.0649
chr13	95188519	95188758	120	0.25946	7.12487	0.00783924	Uninfected_unique	152.705	127.57
chr13	95364291	95364578	144	1.02444	7.73551	3.52526e-14	Uninfected_unique	303.958	149.426
chr13	95555086	95555271	93	-0.35133	6.9303	0.00409095	Uninfected_unique	107.981	137.755
chr13	95620045	95620459	207	0.70767	7.42132	7.09968e-07	Uninfected_unique	219.056	134.13
chr13	95677392	95677728	168	0.90911	7.25561	7.99027e-09	Uninfected_unique	209.407	111.512
chr13	96205072	96205424	176	0.80454	7.63629	4.43064e-09	Uninfected_unique	262.935	150.542
chr13	96343082	96343483	201	1.21801	7.67507	2.81388e-18	Uninfected_unique	311.713	133.998
chr13	96580568	96580937	185	0.46924	7.44605	0.000211372	Uninfected_unique	205.169	148.203
chr13	96894335	96894527	96	0.44052	6.58924	0.00331265	Uninfected_unique	112.167	82.6521
chr13	96942750	96942925	88	0.16608	7.38858	0.0127244	Uninfected_unique	177.493	158.193
chr13	97706798	97707007	105	1.02241	6.48754	3.85272e-07	Uninfected_unique	127.889	62.9588
chr13	97943530	97943722	96	0.45526	7.39678	0.000349529	Uninfected_unique	197.322	143.923
chr13	98504891	98505118	114	0.90627	7.42565	1.21118e-09	Uninfected_unique	235.37	125.585
chr13	99134802	99135015	107	0.58677	7.78942	2.31412e-06	Uninfected_unique	271.123	180.523
chr13	99477889	99478236	174	0.15712	7.78685	0.00989635	Uninfected_unique	233.198	209.135
chr13	99704363	99704573	105	-0.10698	8.85695	0.00702671	Uninfected_unique	446.792	481.182
chr13	99894576	99894961	193	1.17289	7.33799	6.1918e-14	Uninfected_unique	242.936	107.75
chr13	100989115	100989352	119	0.11842	7.58826	0.0145765	Uninfected_unique	200.502	184.701
chr13	101932682	101932874	96	0.59997	6.94498	0.000115439	Uninfected_unique	151.688	100.079
chr13	102206760	102206979	110	0.0677	7.19103	0.0214245	Uninfected_unique	149.591	142.733
chr13	103686513	103686688	88	-0.22783	6.47059	0.0172615	Uninfected_unique	81.9502	95.9696
chr13	107025787	107025999	106	0.18389	6.05066	0.0255159	Uninfected_unique	70.6494	62.1945
chr13	107572034	107572259	113	-0.22263	7.33103	0.00844652	Uninfected_unique	149.056	173.928
chr13	108435242	108435596	177	1.24845	6.23042	2.80951e-08	Uninfected_unique	115.732	48.7116
chr13	111295698	111295924	113	0.61838	7.06027	6.14728e-05	Uninfected_unique	165.359	107.715
chr13	112048386	112048566	90	0.59193	6.47407	0.000670919	Uninfected_unique	109.14	72.4094
chr13	112220368	112220551	92	0.47343	6.75204	0.00138136	Uninfected_unique	127.006	91.4762
chr13	112220646	112220821	88	0.55299	6.69967	0.000625697	Uninfected_unique	125.903	85.816
chr13	112790658	112790833	88	0.31942	6.46204	0.0108413	Uninfected_unique	98.4794	78.9206
chr13	112863949	112864124	88	0.86459	6.58102	5.80024e-06	Uninfected_unique	129.187	70.9497
chr13	113142925	113143211	143	0.39009	6.78054	0.00353353	Uninfected_unique	125.852	96.0354
chr13	113369605	113369821	108	1.27298	6.55428	2.7846e-10	Uninfected_unique	146.096	60.455
chr13	113721998	113722266	134	1.04339	6.75354	1.89227e-08	Uninfected_unique	154.904	75.1575
chr13	114030150	114030341	96	0.80036	6.74044	7.55412e-06	Uninfected_unique	141.104	81.023
chr13	114090222	114090594	186	1.06836	7.71454	6.42397e-15	Uninfected_unique	304.167	145.045
chr13	114428762	114428977	108	1.86083	7.92136	2.20795e-46	Uninfected_unique	462.008	127.199
chr13	114579114	114579420	153	2.09607	6.8197	3.63247e-28	Uninfected_unique	233.574	54.6317
chr13	114816653	114816857	102	0.86836	6.85862	7.17637e-07	Uninfected_unique	156.802	85.8913
chr13	114898033	114898225	96	1.22964	6.96373	5.0251e-12	Uninfected_unique	191.148	81.5103
chr13	114930546	114930773	114	1.04868	6.30799	8.83306e-07	Uninfected_unique	113.956	55.0874
chr13	114965014	114965314	150	1.37999	6.47987	3.48227e-11	Uninfected_unique	143.994	55.3256
chr12	80081	80396	158	1.41622	7.43891	1.61315e-20	Uninfected_unique	283.464	106.212
chr12	176178	176416	119	1.52725	6.45943	8.0274e-13	Uninfected_unique	149.402	51.8332
chr12	272356	272586	115	1.34036	6.91554	1.4447e-13	Uninfected_unique	192.101	75.8649
chr12	529578	529753	88	0.22905	6.44947	0.0172517	Uninfected_unique	94.6149	80.7251
chr12	568990	569386	198	1.34448	7.14786	1.03751e-15	Uninfected_unique	225.988	88.993
chr12	569544	569729	93	1.43711	7.20937	2.35968e-18	Uninfected_unique	243.525	89.9353
chr12	1024426	1024615	95	0.15867	6.76685	0.0194237	Uninfected_unique	115.055	103.072
chr12	1107217	1107418	101	0.57039	7.5656	1.1098e-05	Uninfected_unique	230.847	155.461
chr12	1194367	1194543	88	1.13535	6.27345	1.70337e-07	Uninfected_unique	114.653	52.1927
chr12	1194644	1194835	96	1.27805	6.15832	3.30927e-08	Uninfected_unique	111.226	45.8642
chr12	1683448	1683705	129	1.73553	6.10064	8.70501e-13	Uninfected_unique	125.227	37.6056
chr12	2214731	2214998	134	1.32227	6.0091	5.37378e-08	Uninfected_unique	101.845	40.7285
chr12	3204753	3205046	147	1.59828	6.21836	3.94724e-12	Uninfected_unique	129.562	42.7905
chr12	3992445	3992620	88	-0.0393	6.28154	0.0314861	Uninfected_unique	76.7391	78.8583
chr12	4644277	4644575	149	0.28511	6.58182	0.0112941	Uninfected_unique	105.74	86.7785
chr12	6756511	6756711	100	1.02855	6.92536	4.39283e-09	Uninfected_unique	173.601	85.0999
chr12	8336978	8337218	120	1.26475	6.92084	1.77075e-12	Uninfected_unique	187.821	78.1658
chr12	8777824	8778870	523	1.59418	7.35197	4.5827e-24	Uninfected_unique	283.865	94.019
chr12	8801215	8801412	99	0.39501	6.43518	0.00579478	Uninfected_unique	99.2287	75.4618
chr12	9557109	9557445	168	2.79391	6.41696	1.43637e-37	Uninfected_unique	225.021	32.4468
chr12	9569089	9569264	88	0.35768	7.40355	0.00163688	Uninfected_unique	191.658	149.573
chr12	10105925	10106276	176	1.64335	6.7032	6.59895e-17	Uninfected_unique	184.168	58.9543
chr12	11911154	11911346	96	-0.36186	7.99552	0.000326353	Uninfected_unique	225.126	289.306
chr12	12567635	12567876	121	1.94664	6.51073	1.90153e-20	Uninfected_unique	179.029	46.4437
chr12	12714567	12714779	106	-0.21381	7.34862	0.0084944	Uninfected_unique	151.347	175.524
chr12	14433896	14434159	132	0.4043	6.84418	0.00288637	Uninfected_unique	132.177	99.8735
chr12	16140199	16140438	120	0.16781	6.64993	0.0208274	Uninfected_unique	106.435	94.7481
chr12	16757926	16758111	93	-0.60627	8.32133	1.0382e-08	Uninfected_unique	259.249	394.66
chr12	26267095	26267279	92	0.44666	6.26456	0.00505665	Uninfected_unique	89.7531	65.8554
chr12	26938368	26938876	254	1.5432	6.64205	1.30633e-14	Uninfected_unique	170.503	58.5035
chr12	31174233	31174420	94	-0.19531	7.3076	0.0104624	Uninfected_unique	148.05	169.513
chr12	31175935	31176150	108	-0.24773	8.05231	0.0025877	Uninfected_unique	243.613	289.25
chr12	31184359	31184551	96	-0.21441	9.04846	0.000697915	Uninfected_unique	491.571	570.335
chr12	31368895	31369070	88	0.62808	6.72596	0.000163857	Uninfected_unique	131.599	85.1491
chr12	31477942	31478148	103	0.04633	9.30551	0.00957304	Uninfected_unique	643	622.679
chr12	31557251	31557431	90	0.6276	7.83408	3.97943e-07	Uninfected_unique	283.633	183.582
chr12	31678765	31678991	113	0.79677	6.41832	4.4219e-05	Uninfected_unique	112.728	64.8905
chr12	33049603	33049901	149	1.35169	6.40689	2.07561e-10	Uninfected_unique	135.555	53.1149
chr12	38444735	38444924	95	1.00533	6.33089	2.0111e-06	Uninfected_unique	114.053	56.816
chr12	38447054	38447248	97	0.97734	6.51641	8.5797e-07	Uninfected_unique	128.452	65.2425
chr12	38448776	38448954	89	0.96549	6.66244	2.48274e-07	Uninfected_unique	141.552	72.4892
chr12	38536687	38536899	106	1.08751	6.36989	2.48058e-07	Uninfected_unique	120.563	56.7337
chr12	38578454	38578629	88	0.64639	5.91089	0.0018544	Uninfected_unique	75.2743	48.091
chr12	40620485	40620747	131	-0.18727	7.68444	0.00866036	Uninfected_unique	192.779	219.5
chr12	42621685	42622234	275	1.8855	6.9225	7.88231e-25	Uninfected_unique	233.172	63.108
chr12	42983472	42983651	90	1.1448	6.45298	3.6201e-08	Uninfected_unique	130.272	58.9157
chr12	46123620	46123805	93	-0.10588	9.9954	0.00222848	Uninfected_unique	983.963	1058.89
chr12	46380512	46380710	99	-0.13414	6.81556	0.021266	Uninfected_unique	107.522	117.999
chr12	47473467	47473642	88	0.35531	6.71331	0.00557637	Uninfected_unique	118.683	92.7744
chr12	47750148	47750390	121	0.30411	6.30367	0.0127812	Uninfected_unique	87.7742	71.092
chr12	48202407	48202582	88	-0.05492	9.43534	0.00823921	Uninfected_unique	679.288	705.646
chr12	48230590	48230802	106	0.14734	8.54483	0.00555899	Uninfected_unique	393.031	354.873
chr12	48726190	48726682	246	1.31228	7.2671	3.57243e-16	Uninfected_unique	242.735	97.7456
chr12	48726836	48727068	116	1.46689	7.18816	1.46705e-18	Uninfected_unique	242.46	87.7128
chr12	49118398	49118589	96	0.9449	6.38523	3.65907e-06	Uninfected_unique	115.976	60.2454
chr12	49235667	49235842	88	1.54218	6.80892	4.72925e-16	Uninfected_unique	191.342	65.7004
chr12	49235878	49236129	126	1.49842	6.91536	2.09021e-16	Uninfected_unique	202.892	71.8119
chr12	49309364	49309581	109	1.02241	6.12315	6.31013e-06	Uninfected_unique	99.3436	48.9062
chr12	49829944	49830475	266	1.77749	6.96823	7.28507e-23	Uninfected_unique	231.838	67.625
chr12	49830783	49831209	213	1.87355	6.95401	6.94664e-25	Uninfected_unique	237.336	64.7691
chr12	49931670	49931886	108	0.37296	8.03209	0.00021679	Uninfected_unique	297.876	230.019
chr12	49973246	49973426	90	0.78782	6.22766	0.000137235	Uninfected_unique	98.4671	57.034
chr12	51318630	51318812	91	-0.02802	9.25969	0.0107422	Uninfected_unique	607.054	618.959
chr12	52038619	52039099	240	1.50592	6.41783	2.99763e-12	Uninfected_unique	144.086	50.7336
chr12	52214453	52214808	178	1.23333	7.29224	8.48871e-15	Uninfected_unique	240.335	102.223
chr12	52481833	52482044	106	0.65331	8.86264	5.2314e-13	Uninfected_unique	583.786	371.183
chr12	52482898	52483120	111	0.61833	8.86773	6.05299e-12	Uninfected_unique	578.79	377.038
chr12	52698781	52699009	114	1.04076	7.00372	1.20063e-09	Uninfected_unique	184.069	89.4705
chr12	52831907	52832102	98	0.7337	6.5189	8.14907e-05	Uninfected_unique	118.254	71.1134
chr12	53835796	53835982	93	0.06944	9.10927	0.00862954	Uninfected_unique	565.738	539.153
chr12	54591418	54591638	110	0.84778	6.79219	2.00441e-06	Uninfected_unique	148.681	82.6132
chr12	54609851	54610188	169	0.59699	8.70022	2.26927e-10	Uninfected_unique	511.544	338.198
chr12	54881739	54881950	106	1.26398	6.53665	5.5837e-10	Uninfected_unique	143.872	59.9073
chr12	54881994	54882207	107	1.43992	6.52279	4.59384e-12	Uninfected_unique	151.455	55.8246
chr12	55872542	55872817	138	0.72197	6.54687	9.12536e-05	Uninfected_unique	120.08	72.8009
chr12	56050308	56050483	88	0.07477	6.81685	0.0244869	Uninfected_unique	115.699	109.856
chr12	56123716	56123891	88	0.01677	9.02044	0.012167	Uninfected_unique	522.333	516.296
chr12	57111259	57111643	192	1.31822	7.50482	6.83615e-19	Uninfected_unique	286.806	115.018
chr12	57177520	57177695	88	1.23723	6.67626	2.42654e-10	Uninfected_unique	157.028	66.609
chr12	58109609	58109808	100	0.05711	8.32486	0.0138085	Uninfected_unique	327.061	314.367
chr12	58149927	58150103	88	0.28975	9.32697	1.75321e-05	Uninfected_unique	710.084	580.879
chr12	58511464	58511663	100	0.79834	6.18918	0.000120022	Uninfected_unique	96.2257	55.3308
chr12	62829192	62829407	108	0.17647	7.31755	0.0119463	Uninfected_unique	169.576	150.052
chr12	65174731	65174989	129	0.94945	6.6983	4.47425e-07	Uninfected_unique	144.31	74.7279
chr12	65672791	65672991	100	0.62256	6.62618	0.000290831	Uninfected_unique	122.57	79.6112
chr12	69028025	69028214	95	0.1645	6.99061	0.0160788	Uninfected_unique	134.63	120.122
chr12	69225117	69225397	140	0.94546	6.31667	4.7249e-06	Uninfected_unique	110.615	57.4382
chr12	70246840	70247102	131	1.05728	6.36973	4.57285e-07	Uninfected_unique	119.293	57.3249
chr12	70247164	70247428	132	1.03921	6.53338	2.01056e-07	Uninfected_unique	132.788	64.614
chr12	70595532	70596200	334	1.58574	7.10328	1.92412e-20	Uninfected_unique	238.22	79.3638
chr12	70596225	70596663	219	1.57926	7.07011	1.10281e-19	Uninfected_unique	232.283	77.7343
chr12	72085385	72085560	88	-0.11354	7.54757	0.0152626	Uninfected_unique	179.869	194.596
chr12	76336208	76336389	91	1.97483	6.50666	1.19374e-20	Uninfected_unique	180.277	45.8626
chr12	80701475	80701861	193	1.22837	6.94356	5.01216e-12	Uninfected_unique	188.412	80.414
chr12	82958563	82958744	91	0.44714	6.12188	0.00705801	Uninfected_unique	81.315	59.6442
chr12	86303506	86303696	95	1.04757	5.70734	3.67904e-05	Uninfected_unique	75.12	36.3417
chr12	89746230	89746490	130	-0.00335	7.72167	0.0194087	Uninfected_unique	210.839	211.329
chr12	92825045	92825241	98	0.17096	6.38132	0.024219	Uninfected_unique	88.4506	78.5664
chr12	94954716	94954907	96	0.51975	6.58742	0.00123274	Uninfected_unique	115.144	80.3121
chr12	95209767	95209960	97	0.03667	7.8592	0.0178076	Uninfected_unique	235.166	229.264
chr12	95730326	95730530	102	0.07708	6.90904	0.0238733	Uninfected_unique	123.433	117.011
chr12	96234341	96234728	194	1.68717	7.14145	3.8321e-23	Uninfected_unique	253.358	78.6767
chr12	96234813	96235420	304	1.5665	7.2967	1.135e-22	Uninfected_unique	270.587	91.3574
chr12	96341641	96341915	137	1.75451	6.68643	8.41355e-19	Uninfected_unique	189.189	56.0707
chr12	99675943	99676118	88	0.02148	6.1809	0.0329602	Uninfected_unique	73.0919	72.0117
chr12	99785932	99786198	133	0.976	7.43373	5.79591e-11	Uninfected_unique	242.481	123.274
chr12	99786233	99786540	154	0.96988	7.52824	2.1323e-11	Uninfected_unique	258.349	131.9
chr12	99807609	99807838	115	0.09839	6.4557	0.0271246	Uninfected_unique	90.8173	84.8301
chr12	100378441	100378674	117	0.65949	6.65374	0.000130688	Uninfected_unique	126.543	80.1147
chr12	100687975	100688186	106	1.30236	6.67066	3.0032e-11	Uninfected_unique	159.99	64.87
chr12	100688454	100688789	168	1.29062	6.79447	5.57724e-12	Uninfected_unique	173.619	70.9711
chr12	101797227	101797414	94	0.06359	6.37094	0.0294711	Uninfected_unique	84.6088	80.9604
chr12	104717161	104717620	230	1.67035	6.41385	1.50743e-14	Uninfected_unique	152.116	47.7913
chr12	104879476	104879722	123	0.00646	6.67905	0.0277619	Uninfected_unique	102.699	102.24
chr12	105724854	105725097	122	0.08808	9.87937	0.00388206	Uninfected_unique	971.056	913.544
chr12	106780037	106780219	91	0.38056	6.03439	0.0102139	Uninfected_unique	74.7846	57.445
chr12	108963753	108963928	88	-0.21362	7.53932	0.00778277	Uninfected_unique	172.746	200.315
chr12	109124570	109124789	110	-0.06692	10.1395	0.00461335	Uninfected_unique	1102.13	1154.46
chr12	110072649	110072942	147	1.67918	7.22478	2.73751e-24	Uninfected_unique	267.681	83.586
chr12	110073060	110073475	208	1.65049	7.16345	1.08436e-22	Uninfected_unique	254.002	80.9077
chr12	110353414	110353665	126	0.9367	6.59242	1.08022e-06	Uninfected_unique	133.507	69.7475
chr12	110538655	110538924	135	0.72701	7.81716	1.09706e-08	Uninfected_unique	290.152	175.297
chr12	110610887	110611177	145	1.36921	6.36878	1.96973e-10	Uninfected_unique	132.825	51.4171
chr12	111116281	111116457	88	0.41624	7.61159	0.000326996	Uninfected_unique	225.927	169.304
chr12	111304828	111305328	250	1.76841	7.19986	3.65943e-26	Uninfected_unique	271.36	79.6529
chr12	111305456	111305680	112	1.62849	7.27378	9.30993e-24	Uninfected_unique	272.106	88.0063
chr12	112027348	112027548	100	1.14528	6.07741	8.08145e-07	Uninfected_unique	100.43	45.4047
chr12	112036028	112036251	112	0.38674	8.90072	2.27303e-06	Uninfected_unique	546.505	417.997
chr12	112163138	112163317	90	0.68417	6.59364	0.000132456	Uninfected_unique	122.423	76.1913
chr12	113524262	113524440	89	0.11463	8.97282	0.00568057	Uninfected_unique	522.807	482.875
chr12	113528569	113528863	147	0.60233	7.94956	3.82918e-07	Uninfected_unique	304.59	200.63
chr12	114237917	114238098	91	1.12967	6.66079	3.97084e-09	Uninfected_unique	149.668	68.4014
chr12	114310719	114310915	98	1.01504	7.1577	4.26348e-10	Uninfected_unique	202.984	100.439
chr12	114501653	114501875	111	0.88174	6.93706	2.76904e-07	Uninfected_unique	166.333	90.271
chr12	114501948	114502133	93	0.99259	6.91758	1.58311e-08	Uninfected_unique	170.529	85.7037
chr12	114679697	114679999	151	0.9106	6.44722	5.35341e-06	Uninfected_unique	119.637	63.6426
chr12	117135227	117135420	97	0.61193	6.52739	0.000514498	Uninfected_unique	114.037	74.6166
chr12	117256388	117256586	99	-0.07899	9.22015	0.0073185	Uninfected_unique	580.3	612.958
chr12	117536616	117536966	175	0.7696	7.9098	6.49034e-10	Uninfected_unique	313.995	184.184
chr12	118018579	118018799	110	0.78921	6.43941	4.73398e-05	Uninfected_unique	114.089	66.0188
chr12	118682323	118682502	90	0.80401	5.93335	0.000277542	Uninfected_unique	80.748	46.2488
chr12	120356452	120356725	137	2.11852	6.38698	7.81625e-22	Uninfected_unique	174.398	40.1609
chr12	120633598	120633836	119	0.35873	8.19906	0.000182456	Uninfected_unique	332.78	259.519
chr12	121079210	121079440	115	0.46979	8.02407	1.80075e-05	Uninfected_unique	306.335	221.195
chr12	121661311	121661490	90	0.40773	7.02467	0.00182293	Uninfected_unique	149.971	113.049
chr12	122185318	122185576	129	1.80921	7.41188	1.6275e-31	Uninfected_unique	318.795	90.9672
chr12	122185736	122186131	198	1.63458	7.59989	1.60796e-29	Uninfected_unique	341.841	110.095
chr12	122419290	122419467	89	0.13988	8.93207	0.00392994	Uninfected_unique	512.714	465.336
chr12	123568725	123568944	110	0.0818	8.61114	0.0104694	Uninfected_unique	402.275	380.101
chr12	124396046	124396244	99	2.11325	6.70605	1.09119e-26	Uninfected_unique	217.169	50.1934
chr12	124586469	124586677	104	1.6194	6.50316	1.42732e-14	Uninfected_unique	158.997	51.749
chr12	124923674	124923947	137	1.14599	6.90447	2.19984e-10	Uninfected_unique	178.214	80.5311
chr12	125052545	125052763	109	0.2346	9.11384	0.000313124	Uninfected_unique	600.966	510.774
chr12	125399115	125399309	97	-0.0236	9.53647	0.00985823	Uninfected_unique	736.565	748.714
chr12	125485626	125485807	91	0.1367	8.59946	0.00593355	Uninfected_unique	406.697	369.93
chr12	129123419	129123626	104	1.1565	5.88955	2.71339e-06	Uninfected_unique	88.5119	39.7064
chr12	130646431	130646652	111	2.10674	6.34051	5.46869e-21	Uninfected_unique	168.182	39.047
chr12	130822327	130822597	135	1.85069	6.27987	3.79658e-16	Uninfected_unique	147.566	40.9141
chr12	130823113	130823288	88	1.54308	6.57175	6.43529e-14	Uninfected_unique	162.387	55.7234
chr12	130871272	130871810	269	1.46773	6.55033	6.76956e-13	Uninfected_unique	155.87	56.3547
chr12	130877512	130877729	109	1.3094	6.35605	1.4784e-09	Uninfected_unique	128.957	52.0328
chr12	131266294	131266676	191	1.13488	7.07464	2.06872e-11	Uninfected_unique	199.754	90.9625
chr12	131790671	131790846	88	1.24357	6.37071	8.52948e-09	Uninfected_unique	127.336	53.7773
chr12	131939357	131939533	88	0.50418	6.58999	0.00149146	Uninfected_unique	114.728	80.8906
chr12	131962084	131962259	88	1.10964	6.16455	1.02846e-06	Uninfected_unique	105.374	48.8312
chr12	132401565	132401765	100	1.39305	7.3908	2.95413e-19	Uninfected_unique	271.974	103.557
chr12	132811713	132812004	146	1.83477	7.62281	3.81695e-37	Uninfected_unique	372.267	104.36
chr12	132812370	132812551	91	2.20462	7.82036	5.21018e-60	Uninfected_unique	485.279	105.277
chr12	132816062	132816253	96	2.33932	7.85484	7.76338e-69	Uninfected_unique	520.769	102.906
chr12	132938934	132939134	100	1.32524	6.74184	6.37166e-12	Uninfected_unique	169.42	67.6126
chr12	133343911	133344108	99	0.48861	8.13251	5.87361e-06	Uninfected_unique	332.409	236.912
chr12	133410819	133411016	99	0.31364	7.6598	0.00182576	Uninfected_unique	225.443	181.394
chr11	135018	135263	123	1.14024	7.06849	1.78461e-11	Uninfected_unique	199.274	90.4075
chr11	360990	361187	99	1.17319	7.0577	8.03072e-12	Uninfected_unique	200.061	88.7149
chr11	411532	411718	93	2.11547	7.17466	2.23441e-36	Uninfected_unique	300.745	69.403
chr11	664461	665057	298	1.21233	6.80149	6.28619e-11	Uninfected_unique	169.796	73.2789
chr11	1017689	1018052	182	1.28944	8.78968	5.18285e-41	Uninfected_unique	691.891	283.059
chr11	1162607	1162791	92	1.23731	6.20833	3.33087e-08	Uninfected_unique	113.534	48.157
chr11	1357662	1357941	140	0.97795	7.23821	7.89967e-10	Uninfected_unique	211.892	107.578
chr11	1404582	1404774	96	1.13488	7.07464	2.06872e-11	Uninfected_unique	199.754	90.9625
chr11	1533286	1533586	150	0.26967	8.26056	0.00104777	Uninfected_unique	336.718	279.31
chr11	1627217	1627451	117	0.64881	6.63864	0.00019617	Uninfected_unique	124.763	79.5745
chr11	1961068	1961243	88	0.75143	6.79384	1.672e-05	Uninfected_unique	143.963	85.5161
chr11	3118137	3118418	141	1.21694	6.31217	2.36214e-08	Uninfected_unique	121.149	52.1176
chr11	4158557	4158857	150	1.22586	6.18589	9.21271e-08	Uninfected_unique	111.339	47.6023
chr11	4355824	4356032	104	0.73007	6.6671	4.24279e-05	Uninfected_unique	130.883	78.9061
chr11	6591779	6592036	129	0.96016	6.69264	3.06455e-07	Uninfected_unique	144.279	74.1595
chr11	8709154	8709334	90	0.06586	8.11153	0.0145581	Uninfected_unique	282.961	270.334
chr11	8753420	8753645	113	0.4949	7.30283	0.000232275	Uninfected_unique	187.439	133.009
chr11	8999137	8999498	181	1.73808	6.82718	3.56533e-20	Uninfected_unique	207.393	62.1697
chr11	9686328	9686618	145	0.01557	9.16401	0.0115889	Uninfected_unique	576.747	570.556
chr11	9778087	9778349	131	0.81553	8.13196	2.84317e-12	Uninfected_unique	372.146	211.453
chr11	10901473	10901670	99	1.03533	5.81114	2.87277e-05	Uninfected_unique	80.3822	39.2188
chr11	11521189	11521377	94	0.45526	6.23112	0.00487983	Uninfected_unique	87.9584	64.155
chr11	11643075	11643278	102	0.05766	9.85792	0.0064038	Uninfected_unique	946.691	909.601
chr11	12030686	12030891	103	0.99178	6.63002	1.99406e-07	Uninfected_unique	139.673	70.2356
chr11	12662526	12662724	99	1.09791	6.41696	1.11611e-07	Uninfected_unique	125.011	58.4044
chr11	14928882	14929115	117	-0.20623	8.59979	0.00190705	Uninfected_unique	361.205	416.711
chr11	16928939	16929351	206	1.40642	6.64395	1.0203e-12	Uninfected_unique	162.823	61.4244
chr11	17035479	17035779	150	1.14896	7.06388	1.78461e-11	Uninfected_unique	199.24	89.8471
chr11	17071643	17072142	250	1.35614	6.84783	2.71456e-13	Uninfected_unique	184.298	71.9918
chr11	18087190	18087369	90	0.89299	6.20433	3.14018e-05	Uninfected_unique	100.484	54.1104
chr11	19480272	19480505	117	0.429	6.19307	0.00641367	Uninfected_unique	84.8928	63.0564
chr11	19994281	19994456	88	0.24382	7.11127	0.00923853	Uninfected_unique	150.454	127.059
chr11	33264913	33265119	103	1.27851	6.38729	3.0439e-09	Uninfected_unique	130.377	53.7441
chr11	33478823	33479035	106	0.92517	6.66521	9.20205e-07	Uninfected_unique	139.856	73.6506
chr11	33483017	33483387	185	0.70399	6.97039	1.38151e-05	Uninfected_unique	160.051	98.2506
chr11	33651739	33651922	92	0.80941	6.28005	7.65811e-05	Uninfected_unique	102.875	58.7023
chr11	34074541	34074718	89	-0.07816	9.26954	0.00730541	Uninfected_unique	600.683	634.123
chr11	35270186	35270396	105	0.62935	5.95321	0.00200502	Uninfected_unique	77.0587	49.8159
chr11	36166321	36166651	165	1.29031	6.74868	1.5606e-11	Uninfected_unique	168.177	68.7613
chr11	41325649	41326094	223	1.20024	7.17329	2.88614e-13	Uninfected_unique	218.791	95.2185
chr11	41326212	41326521	155	1.48568	6.99492	5.4996e-17	Uninfected_unique	213.451	76.2191
chr11	45320290	45320482	96	0.65895	6.28922	0.000543703	Uninfected_unique	98.2711	62.2389
chr11	45759607	45759820	107	1.51274	6.57169	9.56437e-14	Uninfected_unique	160.681	56.31
chr11	45944109	45944325	108	1.23637	8.41512	7.55192e-30	Uninfected_unique	523.957	222.388
chr11	47024854	47025106	126	-0.09087	7.01895	0.0218651	Uninfected_unique	125.672	133.842
chr11	47059718	47060076	179	1.28756	6.436	9.02924e-10	Uninfected_unique	135.278	55.4156
chr11	47118623	47119331	354	1.71544	6.46864	1.06783e-15	Uninfected_unique	160.492	48.8715
chr11	47399110	47399310	100	0.25024	9.22988	0.000129379	Uninfected_unique	654.841	550.562
chr11	47972018	47972222	102	0.49753	6.6546	0.00140262	Uninfected_unique	119.707	84.7908
chr11	58683250	58683490	120	0.62311	6.63648	0.000290831	Uninfected_unique	123.472	80.1664
chr11	58862797	58863010	107	0.37788	6.43771	0.00667163	Uninfected_unique	98.8144	76.0444
chr11	59039390	59039579	95	-0.01581	7.80048	0.0187956	Uninfected_unique	221.717	224.16
chr11	59968293	59968566	137	0.96272	6.59321	5.60115e-07	Uninfected_unique	134.79	69.1592
chr11	59968595	59968898	152	1.06382	6.68684	2.09206e-08	Uninfected_unique	148.957	71.2555
chr11	60390241	60390455	107	1.33773	6.48864	8.95442e-11	Uninfected_unique	142.766	56.4842
chr11	60691820	60692187	184	0.73698	7.79538	9.12181e-09	Uninfected_unique	286.794	172.075
chr11	60859678	60859913	118	1.14886	6.64629	3.42473e-09	Uninfected_unique	149.16	67.2685
chr11	61159866	61160075	105	0.86214	6.6023	4.87363e-06	Uninfected_unique	130.995	72.0652
chr11	62045999	62046297	149	1.79923	6.86894	6.45357e-22	Uninfected_unique	218.056	62.6536
chr11	62046398	62046855	229	1.89519	6.88888	8.85411e-25	Uninfected_unique	228.567	61.4476
chr11	62046986	62047208	111	1.757	6.71585	3.2176e-19	Uninfected_unique	193.253	57.1765
chr11	63828279	63828522	122	0.80364	7.36449	6.38001e-08	Uninfected_unique	217.717	124.73
chr11	63853591	63853821	115	1.28093	6.87684	2.04359e-12	Uninfected_unique	183.204	75.3939
chr11	63939336	63939980	322	1.55142	7.42781	6.40808e-24	Uninfected_unique	294.785	100.573
chr11	64012985	64013256	136	0.45472	8.9505	6.45996e-08	Uninfected_unique	579.177	422.597
chr11	64084413	64084597	92	0.37364	9.22901	4.82541e-07	Uninfected_unique	683.042	527.194
chr11	64215790	64215980	95	0.26679	7.81669	0.00293432	Uninfected_unique	247.294	205.543
chr11	64880634	64880848	107	0.36494	8.91483	5.30645e-06	Uninfected_unique	547.722	425.307
chr11	65274654	65275250	298	0.58706	8.6509	7.98924e-10	Uninfected_unique	492.654	327.959
chr11	65738659	65738974	158	1.35764	6.91325	5.68897e-14	Uninfected_unique	192.948	75.2923
chr11	65838121	65838449	164	0.19262	8.7269	0.00202159	Uninfected_unique	452.951	396.339
chr11	66631445	66631643	99	0.82094	8.48105	4.29933e-15	Uninfected_unique	474.913	268.836
chr11	66897650	66897848	99	0.97717	6.34576	2.98197e-06	Uninfected_unique	114.115	57.9676
chr11	67140349	67140581	116	0.81293	7.9591	4.99435e-11	Uninfected_unique	329.827	187.746
chr11	67351852	67352088	118	0.25536	9.62492	2.06708e-05	Uninfected_unique	862.631	722.693
chr11	67413045	67413255	105	0.61322	9.02049	8.82334e-13	Uninfected_unique	642.298	419.894
chr11	69063569	69063754	93	0.509	7.82297	1.73524e-05	Uninfected_unique	270.123	189.818
chr11	69444940	69445115	88	1.15064	6.06182	8.08145e-07	Uninfected_unique	99.5356	44.8333
chr11	70217395	70217682	144	1.33235	5.72335	4.15121e-07	Uninfected_unique	83.8376	33.2936
chr11	70865745	70866485	370	1.25446	6.9948	1.09325e-12	Uninfected_unique	196.997	82.5714
chr11	71091489	71091828	170	1.65172	6.26261	3.29447e-13	Uninfected_unique	136.095	43.3137
chr11	72213105	72213508	202	1.25577	6.58543	3.99707e-10	Uninfected_unique	148.397	62.1441
chr11	72524485	72524700	108	0.14824	9.7091	0.00107303	Uninfected_unique	881.135	795.093
chr11	73283132	73283362	115	1.02453	6.52641	3.61968e-07	Uninfected_unique	131.478	64.6306
chr11	73647423	73647661	119	1.63848	6.58789	1.26738e-15	Uninfected_unique	169.734	54.5176
chr11	73682350	73682640	145	0.75444	7.77665	6.0101e-09	Uninfected_unique	284.813	168.83
chr11	73840097	73840310	107	1.24835	6.26337	2.36939e-08	Uninfected_unique	118.402	49.8387
chr11	74022487	74022724	119	1.60019	6.36353	3.09414e-13	Uninfected_unique	143.373	47.2891
chr11	74108921	74109160	120	-0.00421	9.08243	0.0120919	Uninfected_unique	541.315	542.897
chr11	76204259	76204494	118	0.8405	6.45147	1.64861e-05	Uninfected_unique	117.11	65.4001
chr11	76532537	76532850	157	1.40024	6.10522	2.4386e-09	Uninfected_unique	111.844	42.3738
chr11	77184945	77185191	123	1.52584	6.51963	1.86446e-13	Uninfected_unique	155.692	54.0683
chr11	77201414	77201692	139	0.88015	6.45789	9.88322e-06	Uninfected_unique	119.26	64.7952
chr11	77849815	77850015	100	-0.17931	8.7421	0.00249124	Uninfected_unique	402.388	455.641
chr11	78590320	78590524	102	0.88176	6.44615	9.08133e-06	Uninfected_unique	118.359	64.2342
chr11	79969068	79969243	88	0.58613	6.26764	0.00148912	Uninfected_unique	94.3993	62.882
chr11	82429346	82429543	99	0.0605	6.53851	0.0279891	Uninfected_unique	94.9279	91.0294
chr11	83027556	83028037	241	1.60483	7.3487	2.27923e-24	Uninfected_unique	284.269	93.4605
chr11	83309898	83310092	97	0.12106	6.83156	0.0212135	Uninfected_unique	118.775	109.215
chr11	83396171	83396365	97	0.97662	6.13442	9.40209e-06	Uninfected_unique	98.5463	50.0782
chr11	85821498	85821777	140	1.48652	6.78251	7.36534e-15	Uninfected_unique	184.282	65.7651
chr11	85822226	85822650	212	1.5988	6.70891	3.04801e-16	Uninfected_unique	182.065	60.109
chr11	86590458	86590896	219	1.54251	6.40297	1.56799e-12	Uninfected_unique	144.43	49.581
chr11	89597631	89597850	110	0.38473	6.92724	0.00317858	Uninfected_unique	139.064	106.512
chr11	92438420	92438789	185	0.8888	6.55813	3.77515e-06	Uninfected_unique	128.225	69.2494
chr11	92438954	92439140	93	1.07209	6.51112	1.16403e-07	Uninfected_unique	132.254	62.9038
chr11	92616204	92616379	88	0.8555	6.07693	8.27976e-05	Uninfected_unique	90.8037	50.1848
chr11	93680150	93680556	203	1.77072	6.49487	5.20158e-17	Uninfected_unique	166.598	48.8237
chr11	94840397	94840572	88	0.48334	6.4771	0.00244312	Uninfected_unique	105.33	75.3445
chr11	95946167	95946375	104	-0.01266	6.87994	0.0259414	Uninfected_unique	117.263	118.297
chr11	101981595	101981824	115	-0.33371	8.5482	9.4991e-05	Uninfected_unique	333.454	420.236
chr11	102189277	102189506	115	-0.16349	9.12924	0.00192031	Uninfected_unique	529.136	592.629
chr11	103778396	103778590	97	-0.44195	7.00836	0.00113915	Uninfected_unique	110.46	150.054
chr11	104065290	104065523	117	1.03312	6.82103	1.26093e-08	Uninfected_unique	161.746	79.0378
chr11	104065578	104065867	145	1.01977	6.71011	7.35611e-08	Uninfected_unique	149.085	73.5282
chr11	111170488	111170790	151	1.15778	7.26401	3.84348e-13	Uninfected_unique	229.587	102.901
chr11	111217635	111217810	88	0.28691	7.54564	0.00332431	Uninfected_unique	206.371	169.153
chr11	111270459	111270730	136	0.35993	8.30069	0.000115611	Uninfected_unique	357.217	278.344
chr11	111586203	111586449	123	0.0885	7.07424	0.0215544	Uninfected_unique	138.957	130.689
chr11	112455506	112455699	97	0.4251	6.25433	0.00670038	Uninfected_unique	88.4555	65.8805
chr11	116967322	116967497	88	0.24722	7.27623	0.00701737	Uninfected_unique	168.878	142.283
chr11	118016601	118016861	130	0.60643	7.89719	4.83923e-07	Uninfected_unique	294.149	193.203
chr11	118201865	118202174	155	1.9027	6.82628	1.53529e-23	Uninfected_unique	219.432	58.6854
chr11	118800283	118800514	116	0.51842	9.32505	1.09469e-11	Uninfected_unique	767.626	535.907
chr11	119518800	119519182	191	1.19873	6.64593	7.88217e-10	Uninfected_unique	151.723	66.0994
chr11	119596878	119597095	109	0.56888	7.36701	4.03142e-05	Uninfected_unique	201.055	135.54
chr11	120199311	120199499	94	0.26712	6.28611	0.0155804	Uninfected_unique	85.6078	71.1381
chr11	120492992	120493174	91	0.64674	6.34712	0.000506807	Uninfected_unique	101.863	65.0623
chr11	121446036	121446231	98	1.15723	5.91049	1.95967e-06	Uninfected_unique	89.8287	40.2767
chr11	122860348	122860523	88	1.60731	5.5168	2.44757e-08	Uninfected_unique	79.9184	26.23
chr11	123174733	123174933	100	0.40775	7.74221	0.000259703	Uninfected_unique	246.61	185.894
chr11	123946923	123947150	114	0.61925	6.56283	0.000364547	Uninfected_unique	117.17	76.2785
chr11	125733332	125733627	148	1.43536	6.64458	4.79328e-13	Uninfected_unique	164.536	60.838
chr11	126337504	126337690	93	0.57113	8.51758	8.79471e-09	Uninfected_unique	446.695	300.665
chr11	126355042	126355269	114	0.37378	7.33078	0.00145678	Uninfected_unique	183.25	141.425
chr11	127901535	127901711	88	0.41903	6.55947	0.00429153	Uninfected_unique	109.061	81.5693
chr11	128666284	128666510	113	0.88853	6.23199	2.62989e-05	Uninfected_unique	102.271	55.2432
chr11	128775125	128775341	108	-0.25898	7.56717	0.00447719	Uninfected_unique	173.366	207.456
chr11	128800642	128800822	90	0.82784	6.93756	1.16072e-06	Uninfected_unique	163.311	92.005
chr11	129455226	129455448	111	0.50415	6.30413	0.00272507	Uninfected_unique	94.1054	66.3514
chr11	129842668	129842920	126	-0.10051	8.57085	0.0089596	Uninfected_unique	367.244	393.742
chr11	129960689	129961378	345	1.67397	7.35623	2.64241e-26	Uninfected_unique	292.687	91.7251
chr11	129961412	129961780	184	1.64101	7.42311	1.52906e-26	Uninfected_unique	303.093	97.1812
chr11	130185270	130185481	106	-0.07822	9.38799	0.00672034	Uninfected_unique	652.069	688.398
chr11	133854031	133854215	92	0.67788	6.45803	0.000280896	Uninfected_unique	111.197	69.5072
chr11	133938769	133939021	126	0.75876	6.46115	6.80857e-05	Uninfected_unique	114.605	67.7322
chr11	134178029	134178524	248	0.88661	6.20131	3.14018e-05	Uninfected_unique	100.053	54.1168
chr11	134321406	134321584	89	0.62793	6.51324	0.000321452	Uninfected_unique	113.552	73.4798
chr11	134709290	134709510	110	1.1496	6.96405	6.90914e-11	Uninfected_unique	185.96	83.8216
chr11	134709595	134709855	130	1.11122	7.01937	8.99102e-11	Uninfected_unique	190.676	88.2644
chr11	134946371	134946573	101	0.07588	7.47718	0.0188424	Uninfected_unique	182.926	173.554
chr10	74031	74342	156	0.80428	6.60784	1.53643e-05	Uninfected_unique	128.889	73.8077
chr10	103474	103752	139	1.071	5.94897	7.60831e-06	Uninfected_unique	89.5406	42.6203
chr10	110168	110504	168	1.26108	6.13237	3.91688e-08	Uninfected_unique	108.602	45.3123
chr10	151080	151304	112	1.05188	6.36717	4.57285e-07	Uninfected_unique	118.859	57.3305
chr10	310925	311118	97	1.23989	6.4564	2.59336e-09	Uninfected_unique	134.956	57.141
chr10	367516	367831	158	1.64904	6.40373	3.47724e-14	Uninfected_unique	149.941	47.809
chr10	368783	368994	106	1.9206	6.35217	5.95677e-18	Uninfected_unique	158.954	41.987
chr10	369103	369281	89	1.58747	6.60716	3.84742e-15	Uninfected_unique	169.002	56.2361
chr10	783654	784258	302	1.92223	6.51637	7.24199e-20	Uninfected_unique	178.216	47.0217
chr10	849366	849550	92	1.25673	6.63661	1.43513e-10	Uninfected_unique	153.807	64.3668
chr10	1004229	1004578	175	0.89208	7.1455	3.18624e-08	Uninfected_unique	192.877	103.929
chr10	1455141	1455394	127	0.74878	7.20042	9.5298e-07	Uninfected_unique	190.654	113.459
chr10	1480730	1480905	88	0.33578	6.8196	0.00601278	Uninfected_unique	126.895	100.546
chr10	1600510	1600803	147	1.16196	6.69932	1.26664e-09	Uninfected_unique	155.449	69.4711
chr10	1617700	1617906	103	0.55443	7.14907	0.00012338	Uninfected_unique	172.002	117.121
chr10	1719550	1719755	103	0.29141	6.80643	0.00822584	Uninfected_unique	123.823	101.176
chr10	2274078	2274331	127	0.94889	6.49052	1.98634e-06	Uninfected_unique	124.929	64.7171
chr10	2563270	2563690	210	1.61952	6.65061	4.37546e-16	Uninfected_unique	176.115	57.3154
chr10	2564177	2564431	127	1.71888	7.07411	4.17138e-23	Uninfected_unique	244.476	74.2681
chr10	2564627	2564852	113	1.9011	6.99132	2.72946e-26	Uninfected_unique	245.89	65.8344
chr10	2565198	2565373	88	1.83668	6.8218	3.37012e-22	Uninfected_unique	213.803	59.8575
chr10	3127286	3127722	218	1.55286	6.42409	4.74212e-13	Uninfected_unique	147.086	50.132
chr10	3357206	3357410	102	1.14738	7.22831	1.42184e-12	Uninfected_unique	223.17	100.749
chr10	5423195	5423407	106	0.80552	6.66172	1.17245e-05	Uninfected_unique	133.851	76.5834
chr10	5687995	5688270	138	0.15997	7.47621	0.0120629	Uninfected_unique	188.209	168.456
chr10	5814419	5814601	91	0.70504	6.2714	0.000340501	Uninfected_unique	98.6276	60.5007
chr10	6389385	6389575	95	-0.06213	9.46028	0.0075573	Uninfected_unique	689.408	719.746
chr10	6489482	6489658	88	0.60435	6.49105	0.000576609	Uninfected_unique	110.908	72.952
chr10	7562797	7563023	113	0.90697	6.50747	2.87418e-06	Uninfected_unique	124.582	66.4402
chr10	8103790	8103978	94	0.68394	6.38945	0.000285728	Uninfected_unique	106.257	66.1413
chr10	11326229	11326549	160	1.57839	7.68769	2.87295e-29	Uninfected_unique	356.284	119.304
chr10	11491034	11491258	112	0.36736	8.54664	3.19344e-05	Uninfected_unique	424.706	329.232
chr10	11575485	11575660	88	0.09277	6.20337	0.0301874	Uninfected_unique	76.0963	71.3571
chr10	11654110	11654314	102	0.07645	9.18905	0.00773744	Uninfected_unique	599.358	568.425
chr10	11668184	11668405	111	0.69568	6.41926	0.000196187	Uninfected_unique	108.918	67.248
chr10	11715423	11715611	94	-0.15412	8.18083	0.00724289	Uninfected_unique	275.092	306.107
chr10	11927389	11927615	113	1.45013	6.43831	8.30113e-12	Uninfected_unique	143.348	52.4636
chr10	12561039	12561289	125	1.60295	6.76305	6.99308e-17	Uninfected_unique	189.299	62.3179
chr10	12817722	12817916	97	0.25519	7.22388	0.00747656	Uninfected_unique	163.311	136.834
chr10	14131238	14131447	105	0.99403	6.32553	2.68146e-06	Uninfected_unique	113.185	56.8274
chr10	14610294	14610626	166	0.75267	6.59418	3.94034e-05	Uninfected_unique	125.411	74.4317
chr10	15271601	15271831	115	0.98481	5.86894	5.30166e-05	Uninfected_unique	82.2159	41.543
chr10	17659110	17659343	117	0.82182	6.40508	3.22948e-05	Uninfected_unique	112.672	63.7419
chr10	17670928	17671261	167	1.44942	6.55583	1.85272e-12	Uninfected_unique	155.475	56.9301
chr10	18421897	18422074	89	0.09104	5.2534	0.044442	Uninfected_unique	39.3671	36.9597
chr10	21719253	21719485	116	1.50575	6.30149	1.70406e-11	Uninfected_unique	132.915	46.8058
chr10	22839762	22839937	88	0.23663	6.22522	0.0201764	Uninfected_unique	81.2072	68.9226
chr10	24945218	24945472	127	1.82045	7.18457	1.38426e-27	Uninfected_unique	273.386	77.4045
chr10	24945496	24945862	183	1.77338	7.19232	2.5832e-26	Uninfected_unique	270.411	79.1013
chr10	24945892	24946068	88	1.74829	7.06667	8.16904e-24	Uninfected_unique	245.71	73.1368
chr10	26190402	26190639	119	-0.49644	8.23087	2.21474e-06	Uninfected_unique	252.94	356.829
chr10	27090304	27090490	93	-0.04276	7.28453	0.0219981	Uninfected_unique	153.612	158.233
chr10	27585557	27585764	104	1.29531	6.53803	1.6221e-10	Uninfected_unique	145.582	59.3171
chr10	29985638	29985983	173	1.5647	6.29436	4.00675e-12	Uninfected_unique	134.99	45.6331
chr10	30024624	30024799	88	0.94393	6.99265	2.9851e-08	Uninfected_unique	176.633	91.8167
chr10	32258994	32259380	193	1.69758	7.14639	1.6451e-23	Uninfected_unique	255.146	78.6623
chr10	32259417	32259922	253	1.58941	7.06474	5.54963e-20	Uninfected_unique	232.236	77.1736
chr10	33261462	33261721	130	0.46579	7.55522	0.000153423	Uninfected_unique	221.033	160.044
chr10	33403517	33403749	116	0.42494	6.47062	0.00455894	Uninfected_unique	102.757	76.5404
chr10	33440264	33440648	192	1.55526	6.68825	2.31442e-15	Uninfected_unique	176.788	60.1553
chr10	35956005	35956431	213	0.96383	6.55848	6.01689e-07	Uninfected_unique	131.635	67.4883
chr10	38699589	38699808	110	0.94107	6.62858	6.87379e-07	Uninfected_unique	137.103	71.4095
chr10	38981451	38981707	128	0.91056	6.18224	2.20221e-05	Uninfected_unique	99.5618	52.9647
chr10	42644464	42644659	98	1.21087	7.77152	5.33627e-19	Uninfected_unique	332.441	143.617
chr10	42651842	42652038	98	0.26952	7.06653	0.00762529	Uninfected_unique	147.165	122.087
chr10	42653346	42653640	147	0.35953	7.22084	0.00236831	Uninfected_unique	168.968	131.697
chr10	42698664	42698876	106	0.49503	6.67217	0.00143692	Uninfected_unique	121.069	85.9041
chr10	42698997	42699172	88	0.59354	6.6521	0.000380261	Uninfected_unique	123.543	81.8738
chr10	42758927	42759244	159	0.42601	7.08813	0.00113082	Uninfected_unique	157.711	117.387
chr10	44197811	44197986	88	1.02978	6.50378	3.2257e-07	Uninfected_unique	129.667	63.509
chr10	45158115	45158584	235	1.38597	7.0476	1.47607e-15	Uninfected_unique	213.869	81.8332
chr10	45745869	45746054	93	0.71332	6.42763	0.000157841	Uninfected_unique	110.224	67.2271
chr10	45843011	45843212	101	1.26534	6.65308	1.21532e-10	Uninfected_unique	156.038	64.9119
chr10	45914806	45915082	138	0.50751	7.43236	0.000104919	Uninfected_unique	205.945	144.869
chr10	50720341	50720516	88	0.17111	6.25191	0.0247501	Uninfected_unique	80.8662	71.8221
chr10	51503390	51503644	127	0.04489	8.756	0.0122998	Uninfected_unique	439.112	425.659
chr10	60730031	60730209	89	0.3033	6.32592	0.012845	Uninfected_unique	89.1134	72.2172
chr10	61456322	61456570	124	1.01073	6.68391	7.8199e-08	Uninfected_unique	145.944	72.4315
chr10	62493199	62493463	132	0.22475	6.83635	0.0130226	Uninfected_unique	123.531	105.711
chr10	63718019	63718238	110	0.15293	8.50041	0.00519326	Uninfected_unique	381.853	343.447
chr10	63758779	63759002	112	0.00921	7.98274	0.0176566	Uninfected_unique	253.764	252.149
chr10	63807688	63807979	146	0.09765	7.6358	0.0156317	Uninfected_unique	205.732	192.268
chr10	64707725	64707918	97	1.70559	6.66321	1.11408e-17	Uninfected_unique	183.039	56.1189
chr10	69451495	69451670	88	1.39348	6.65078	1.85136e-12	Uninfected_unique	162.864	61.9933
chr10	70092173	70092356	92	-0.16457	9.63245	0.000783477	Uninfected_unique	749.698	840.285
chr10	71752310	71752538	114	1.39429	6.52967	1.21696e-11	Uninfected_unique	149.792	56.9856
chr10	71752706	71753141	218	1.43666	6.63196	5.55701e-13	Uninfected_unique	163.177	60.2809
chr10	71753305	71753510	103	1.30247	6.65832	2.47883e-11	Uninfected_unique	158.634	64.3151
chr10	71948634	71948815	91	0.38143	6.27012	0.00889021	Uninfected_unique	88.0856	67.6213
chr10	71992152	71992344	96	0.09034	8.79486	0.00861092	Uninfected_unique	458.262	430.446
chr10	72303783	72303987	102	0.61758	7.51118	4.61066e-06	Uninfected_unique	225.967	147.277
chr10	72446672	72446925	127	1.62852	6.9771	1.0108e-19	Uninfected_unique	221.53	71.6473
chr10	73448300	73448966	333	2.52492	7.02322	6.29885e-46	Uninfected_unique	312.06	54.2203
chr10	73596947	73597165	109	0.19225	9.26816	0.000747469	Uninfected_unique	659.069	576.843
chr10	73836045	73836265	110	0.89832	7.33886	4.04707e-09	Uninfected_unique	221.018	118.579
chr10	77092969	77093431	231	2.11993	6.32586	3.36108e-21	Uninfected_unique	167.246	38.4762
chr10	79279796	79280035	120	0.43026	6.74888	0.00258351	Uninfected_unique	124.846	92.652
chr10	80194062	80194263	101	0.56217	6.74079	0.00046907	Uninfected_unique	129.956	88.0167
chr10	80782983	80783256	137	0.56049	7.21748	8.90123e-05	Uninfected_unique	180.734	122.551
chr10	81021176	81021386	105	0.489	7.69102	4.68498e-05	Uninfected_unique	244.81	174.432
chr10	81026314	81026692	189	0.93194	7.88791	3.03597e-13	Uninfected_unique	327.166	171.485
chr10	81045098	81045346	124	0.3835	8.74843	7.49349e-06	Uninfected_unique	491.205	376.545
chr10	82294462	82294702	120	1.25726	7.51577	1.41091e-17	Uninfected_unique	282.949	118.368
chr10	85963971	85964148	89	0.50014	6.83277	0.000830148	Uninfected_unique	135.565	95.8496
chr10	86373253	86373448	98	0.23612	6.67386	0.0137886	Uninfected_unique	110.808	94.079
chr10	88730918	88731115	99	1.31009	7.18355	1.8948e-15	Uninfected_unique	228.903	92.3158
chr10	88840669	88841109	220	1.61237	6.59015	2.88984e-15	Uninfected_unique	168.468	55.0994
chr10	93083016	93083277	131	1.33533	6.5434	7.94832e-11	Uninfected_unique	148.165	58.7182
chr10	93504534	93504736	101	0.73369	5.98613	0.000538113	Uninfected_unique	81.7403	49.1556
chr10	94135826	94136121	148	1.77513	7.33445	4.42992e-29	Uninfected_unique	298.589	87.238
chr10	94136151	94136350	100	1.76118	7.25429	4.92154e-27	Uninfected_unique	281.088	82.923
chr10	94434284	94434605	161	1.82991	7.09458	1.85355e-26	Uninfected_unique	257.698	72.4857
chr10	94434629	94435099	235	1.73926	7.21526	5.15961e-26	Uninfected_unique	271.515	81.3252
chr10	94734864	94735039	88	1.16146	6.77735	4.59088e-10	Uninfected_unique	164.06	73.3447
chr10	94833638	94833840	101	1.63992	7.29687	1.58245e-24	Uninfected_unique	277.594	89.0726
chr10	94833877	94834172	148	1.65454	7.18466	4.21154e-23	Uninfected_unique	258.126	81.9908
chr10	94883437	94883831	197	1.68336	6.57942	1.95666e-16	Uninfected_unique	171.385	53.362
chr10	96997774	96997966	96	-0.09149	8.08375	0.0131199	Uninfected_unique	262.833	280.041
chr10	98478199	98478395	98	0.26679	7.97839	0.00200721	Uninfected_unique	276.624	229.921
chr10	98700570	98700916	173	1.28842	6.90131	8.59524e-13	Uninfected_unique	186.822	76.4847
chr10	98701118	98701461	172	1.14922	7.09008	7.89162e-12	Uninfected_unique	202.909	91.4854
chr10	98945182	98945414	116	1.00901	7.13116	9.1029e-10	Uninfected_unique	198.868	98.8148
chr10	99035465	99036016	276	1.51124	7.17294	9.87336e-20	Uninfected_unique	243.632	85.4685
chr10	99292302	99292484	91	1.0777	6.55164	8.17199e-08	Uninfected_unique	136.286	64.5699
chr10	99928631	99928840	105	-0.21894	8.64292	0.00149372	Uninfected_unique	370.531	431.253
chr10	100993855	100994035	90	0.90376	6.09984	3.76284e-05	Uninfected_unique	93.8133	50.1424
chr10	101598055	101598274	110	1.4339	7.36428	3.87792e-20	Uninfected_unique	270.827	100.241
chr10	101852990	101853234	122	1.86313	6.6496	3.14775e-20	Uninfected_unique	191.495	52.6381
chr10	101853451	101853641	95	1.69157	6.6848	1.00463e-17	Uninfected_unique	184.898	57.2425
chr10	102037018	102037279	131	1.26305	7.16122	2.22067e-14	Uninfected_unique	221.743	92.3919
chr10	102037429	102037817	194	1.35039	7.1418	5.86275e-16	Uninfected_unique	225.502	88.4386
chr10	103795834	103796053	110	0.96734	6.65223	3.29486e-07	Uninfected_unique	140.644	71.9319
chr10	103990742	103990918	88	0.41273	8.31488	2.48337e-05	Uninfected_unique	367.409	275.998
chr10	104061446	104061665	110	0.81149	6.38744	3.83862e-05	Uninfected_unique	110.905	63.1931
chr10	104888974	104889207	117	1.20323	7.23127	1.05495e-13	Uninfected_unique	227.999	99.0205
chr10	104889410	104889706	148	1.32623	7.01925	3.88833e-14	Uninfected_unique	205.41	81.9195
chr10	112526601	112526849	124	1.34474	6.73924	2.54866e-12	Uninfected_unique	170.262	67.0363
chr10	112602144	112602380	118	-0.24237	10.0502	5.0291e-06	Uninfected_unique	974.808	1153.13
chr10	116694953	116695170	109	1.13574	6.64006	4.72486e-09	Uninfected_unique	147.844	67.2839
chr10	119134271	119134464	97	-0.20757	9.29793	0.000453401	Uninfected_unique	585.752	676.392
chr10	119941099	119941315	108	1.09823	6.57378	3.25163e-08	Uninfected_unique	139.381	65.1036
chr10	120826536	120826732	98	0.96331	6.35309	4.37188e-06	Uninfected_unique	114.147	58.5434
chr10	121120065	121120256	96	0.6105	7.1348	4.42716e-05	Uninfected_unique	173.651	113.736
chr10	121464671	121464850	90	-0.06768	7.94019	0.0159125	Uninfected_unique	239.91	251.433
chr10	121554297	121554949	326	1.19222	6.91652	2.68102e-11	Uninfected_unique	182.611	79.9159
chr10	121955219	121955417	99	0.52605	6.54984	0.0013794	Uninfected_unique	112.429	78.0764
chr10	123344293	123344509	108	1.416	6.16937	8.44584e-10	Uninfected_unique	117.57	44.0592
chr10	125013859	125014235	188	1.51432	6.74635	6.60568e-15	Uninfected_unique	181.46	63.5222
chr10	125014422	125014706	142	1.54713	6.82334	1.42868e-16	Uninfected_unique	193.596	66.2466
chr10	125824292	125824477	93	0.67755	7.32944	3.2966e-06	Uninfected_unique	203.406	127.174
chr10	125834166	125834430	132	0.55056	7.78072	6.95653e-06	Uninfected_unique	266.132	181.703
chr10	126195802	126195989	94	1.79276	6.63134	4.55517e-19	Uninfected_unique	184.531	53.2592
chr10	126196219	126196471	126	1.49359	6.78586	4.99649e-15	Uninfected_unique	185.163	65.7566
chr10	126235991	126236166	88	0.29997	7.97073	0.00121538	Uninfected_unique	278.342	226.089
chr10	126298865	126299525	330	1.51582	8.06318	1.50629e-34	Uninfected_unique	452.286	158.163
chr10	126423543	126423742	100	0.56988	7.54529	1.23533e-05	Uninfected_unique	227.58	153.314
chr10	126432151	126432389	119	-0.03669	9.49028	0.00939857	Uninfected_unique	710.128	728.419
chr10	127409238	127409458	110	-0.01055	9.00321	0.0123551	Uninfected_unique	511.268	515.02
chr10	127584417	127584809	196	1.0988	8.8709	4.74378e-32	Uninfected_unique	685.161	319.905
chr10	127584841	127585414	287	1.14062	8.76277	5.61726e-32	Uninfected_unique	644.966	292.534
chr10	127606297	127606523	113	0.98431	6.94113	1.32806e-08	Uninfected_unique	172.839	87.3645
chr10	127606616	127606817	101	1.042	6.95941	2.29785e-09	Uninfected_unique	178.578	86.727
chr10	130017580	130017901	161	1.14952	6.50893	1.34131e-08	Uninfected_unique	135.645	61.1453
chr10	130066312	130066505	97	0.79951	6.45647	3.99123e-05	Uninfected_unique	115.859	66.5661
chr10	132294582	132294824	121	0.83678	6.87112	1.79541e-06	Uninfected_unique	156.445	87.5922
chr10	132588627	132588991	182	1.29232	7.16658	7.79319e-15	Uninfected_unique	224.838	91.7999
chr10	132947108	132947336	114	0.24262	6.45591	0.0172517	Uninfected_unique	95.4862	80.7058
chr10	133110111	133110290	90	0.86629	6.70097	2.64108e-06	Uninfected_unique	140.47	77.0554
chr10	133142585	133142833	124	0.88853	6.23199	2.62989e-05	Uninfected_unique	102.271	55.2432
chr10	134045542	134045770	114	1.2058	7.48478	5.89549e-16	Uninfected_unique	272.041	117.938
chr10	134120571	134120803	116	0.05272	8.91888	0.0108455	Uninfected_unique	492.93	475.242
chr10	134319145	134319336	96	1.58688	6.68989	1.03296e-15	Uninfected_unique	178.94	59.5674
chr10	134328317	134328519	101	0.8921	6.99365	1.38404e-07	Uninfected_unique	173.609	93.5457
chr10	134361999	134362206	104	1.03446	7.96743	2.18462e-16	Uninfected_unique	358.21	174.877
chr10	134362997	134363275	139	0.96815	8.36009	1.25262e-18	Uninfected_unique	459.578	234.918
chr10	134363858	134364085	114	0.51737	9.09531	2.8796e-10	Uninfected_unique	654.385	457.182
chr10	134375539	134375837	149	0.51126	7.55239	5.56106e-05	Uninfected_unique	224.103	157.233
chr10	134823678	134823889	106	0.94198	7.09136	1.04617e-08	Uninfected_unique	189.014	98.3852
chr10	134854949	134855318	185	1.64024	7.3487	2.14097e-25	Uninfected_unique	287.779	92.3206
chr10	134855492	134855693	101	1.6487	7.29223	1.58245e-24	Uninfected_unique	277.545	88.5168
chr10	134951290	134951541	126	1.96551	7.22264	2.6608e-32	Uninfected_unique	295.169	75.5775
chr10	135237326	135237539	107	1.43025	7.57807	5.90308e-23	Uninfected_unique	313.69	116.4
chr10	135246420	135246676	128	0.7008	7.74663	5.20675e-08	Uninfected_unique	273.81	168.456
chr10	135254794	135255024	115	1.22093	7.6822	2.38363e-18	Uninfected_unique	313.575	134.525
chr10	135302641	135302874	117	0.42318	7.17138	0.000974013	Uninfected_unique	166.915	124.482
chr10	135390658	135390892	117	1.10516	7.20827	9.47014e-12	Uninfected_unique	216.895	100.824
chr10	135478713	135478961	124	1.48668	9.61786	2.06023e-93	Uninfected_unique	1315.32	469.35
chr10	135479918	135480187	135	1.89358	9.27547	1.01398e-118	Uninfected_unique	1194.56	321.501
chr17	104437	104654	109	2.1375	5.18097	8.70832e-11	Uninfected_unique	76.0945	17.2942
chr17	106137	106330	97	1.0951	6.67905	9.90244e-09	Uninfected_unique	149.769	70.1077
chr17	122767	123141	187	1.49298	6.34647	1.28196e-11	Uninfected_unique	136.519	48.5023
chr17	165075	165542	234	1.96665	8.10318	3.45545e-58	Uninfected_unique	543.639	139.088
chr17	744609	744796	94	0.84594	5.76276	0.000294546	Uninfected_unique	72.7931	40.4983
chr17	855358	855557	100	1.74229	6.76365	1.12279e-19	Uninfected_unique	198.748	59.4047
chr17	855703	856137	217	1.71905	6.77921	5.16451e-19	Uninfected_unique	199.291	60.5345
chr17	965825	966105	140	0.30519	7.35236	0.00342286	Uninfected_unique	181.642	147.009
chr17	975588	975764	88	0.8804	5.96961	0.000100377	Uninfected_unique	85.0247	46.1868
chr17	1027044	1027485	221	0.45037	7.45274	0.000297127	Uninfected_unique	204.779	149.869
chr17	1076260	1076702	221	1.89693	6.13306	2.07136e-15	Uninfected_unique	135.441	36.3679
chr17	1118709	1119019	155	0.10706	8.00477	0.0119266	Uninfected_unique	266.557	247.492
chr17	1390468	1390707	120	0.27433	8.1206	0.00136821	Uninfected_unique	306.08	253.077
chr17	2240129	2240335	103	-0.37356	8.13002	0.000149454	Uninfected_unique	246.124	318.865
chr17	2350543	2351069	263	1.89897	6.4881	3.03197e-19	Uninfected_unique	173.355	46.4825
chr17	2351160	2351363	102	2.11113	6.38347	7.81625e-22	Uninfected_unique	173.529	40.1661
chr17	2755455	2755810	178	0.56788	7.14196	9.98998e-05	Uninfected_unique	171.957	116.003
chr17	3274786	3275053	134	1.74291	6.3966	1.44332e-15	Uninfected_unique	154.135	46.0505
chr17	3474448	3474629	91	1.1142	5.7616	1.21277e-05	Uninfected_unique	79.8212	36.8732
chr17	3548676	3548980	152	0.11414	7.6596	0.0144596	Uninfected_unique	210.353	194.352
chr17	5095073	5095400	164	2.52983	5.7113	1.34349e-19	Uninfected_unique	125.907	21.802
chr17	5126832	5127063	116	0.04181	7.07006	0.0236331	Uninfected_unique	136.331	132.436
chr17	5404368	5404590	111	1.63019	6.02874	2.85265e-11	Uninfected_unique	114.868	37.1077
chr17	6915833	6916067	117	0.31641	7.45992	0.00276147	Uninfected_unique	196.465	157.774
chr17	7343637	7343919	141	0.58482	7.43645	1.63475e-05	Uninfected_unique	212.138	141.439
chr17	7492698	7492873	88	0.448	6.47098	0.00337537	Uninfected_unique	103.607	75.9501
chr17	7738234	7738422	94	0.06116	9.21848	0.00889197	Uninfected_unique	608.477	583.221
chr17	8023953	8024185	116	-0.07987	8.59759	0.010782	Uninfected_unique	376.8	398.248
chr17	8025262	8025440	89	0.29271	8.28493	0.000672061	Uninfected_unique	345.199	281.809
chr17	12692939	12693119	90	0.44055	6.31014	0.00522882	Uninfected_unique	92.4381	68.1133
chr17	15540424	15540821	199	1.55958	6.21888	8.8984e-12	Uninfected_unique	127.882	43.384
chr17	15540871	15541086	108	1.51726	6.32418	5.21937e-12	Uninfected_unique	135.562	47.3584
chr17	15771004	15771184	90	1.66703	5.88218	1.05713e-10	Uninfected_unique	105.106	33.0978
chr17	15882799	15883015	108	1.7762	5.6592	1.28576e-10	Uninfected_unique	93.5263	27.3051
chr17	17259468	17259654	93	0.39343	6.18905	0.00851816	Uninfected_unique	83.6193	63.6609
chr17	17345521	17345788	134	1.48173	6.25498	6.323e-11	Uninfected_unique	127.632	45.6998
chr17	17346260	17346496	118	1.31501	6.34306	1.21757e-09	Uninfected_unique	128.05	51.4663
chr17	17585879	17586095	108	0.6045	7.35484	1.7345e-05	Uninfected_unique	201.843	132.752
chr17	17662345	17662548	102	-0.20303	8.0117	0.00502181	Uninfected_unique	240.549	276.899
chr17	18228878	18229109	116	0.88887	6.18725	4.07816e-05	Uninfected_unique	99.1599	53.55
chr17	18791664	18791881	109	1.15653	6.26785	1.70337e-07	Uninfected_unique	115.05	51.6102
chr17	18791983	18792195	106	1.09056	6.2047	9.81281e-07	Uninfected_unique	107.633	50.5423
chr17	18943729	18943948	110	0.48579	8.20285	3.71697e-06	Uninfected_unique	348.676	248.992
chr17	19118560	19118735	88	0.09289	7.10024	0.0207544	Uninfected_unique	141.699	132.863
chr17	19531030	19531680	325	1.54442	6.46758	3.63324e-13	Uninfected_unique	151.145	51.8176
chr17	20059118	20059293	88	1.71011	5.68738	4.31649e-10	Uninfected_unique	93.2114	28.4888
chr17	20687523	20687698	88	0.71247	6.2478	0.000306554	Uninfected_unique	97.2776	59.366
chr17	20756068	20756243	88	0.65931	6.35309	0.000413318	Uninfected_unique	102.732	65.0481
chr17	20887702	20887880	89	1.87126	6.82485	3.80738e-23	Uninfected_unique	216.839	59.2696
chr17	21414985	21415179	97	0.82876	6.68316	5.63042e-06	Uninfected_unique	136.953	77.1065
chr17	21566280	21566466	93	0.453	6.11091	0.00600682	Uninfected_unique	80.8631	59.0723
chr17	21904035	21904249	107	1.06488	9.30629	4.15961e-40	Uninfected_unique	915.699	437.716
chr17	22207815	22208091	138	0.07115	6.95941	0.0228986	Uninfected_unique	127.556	121.418
chr17	25290598	25290851	127	0.97912	7.67219	1.27259e-12	Uninfected_unique	286.373	145.274
chr17	25335219	25335394	88	0.41607	6.8577	0.00220753	Uninfected_unique	133.967	100.403
chr17	25360942	25361374	216	1.44862	6.37462	2.39726e-11	Uninfected_unique	137.085	50.2242
chr17	25538609	25539178	285	1.42194	7.07428	1.07798e-16	Uninfected_unique	220.594	82.3279
chr17	25539466	25539764	149	1.43564	7.01205	2.82809e-16	Uninfected_unique	212.287	78.4787
chr17	25621907	25622156	125	-0.1195	8.8918	0.00581668	Uninfected_unique	455.735	495.091
chr17	27039306	27039519	107	0.3345	8.6566	6.03493e-05	Uninfected_unique	453.152	359.376
chr17	27054240	27054462	111	0.21741	9.82984	5.44651e-05	Uninfected_unique	981.296	844.021
chr17	27893161	27893380	110	0.73688	8.84134	1.28577e-15	Uninfected_unique	592.134	355.302
chr17	28706653	28706869	108	0.1075	9.03914	0.00597258	Uninfected_unique	546.05	506.841
chr17	28994168	28994363	98	0.40264	7.28235	0.00103071	Uninfected_unique	178.982	135.395
chr17	29306370	29306716	173	1.81844	7.17343	3.36601e-27	Uninfected_unique	271.094	76.8626
chr17	29306789	29307218	215	1.91506	7.26945	3.68398e-32	Uninfected_unique	299.618	79.447
chr17	29307332	29307555	112	1.94593	7.07137	9.48943e-29	Uninfected_unique	263.989	68.5177
chr17	29672349	29672550	101	0.75692	6.3869	8.41766e-05	Uninfected_unique	108.787	64.3755
chr17	29821309	29821601	146	0.46736	8.08677	1.26042e-05	Uninfected_unique	319.672	231.215
chr17	29853142	29853323	91	0.46754	8.14158	1.00124e-05	Uninfected_unique	332.071	240.153
chr17	30411686	30411878	96	0.34044	7.59375	0.00149847	Uninfected_unique	217.364	171.674
chr17	30625574	30625829	128	1.08561	6.63988	1.91876e-08	Uninfected_unique	145.279	68.4546
chr17	30789488	30789686	99	-0.16624	6.6583	0.0196595	Uninfected_unique	95.3512	106.997
chr17	30810557	30810751	97	0.38044	7.16989	0.00194415	Uninfected_unique	164.291	126.209
chr17	31250325	31250500	88	1.53751	6.47977	2.4381e-13	Uninfected_unique	152.063	52.3826
chr17	33787500	33787848	174	1.09359	5.79599	1.38318e-05	Uninfected_unique	81.165	38.0334
chr17	34054467	34054707	120	1.09809	7.05718	9.99215e-11	Uninfected_unique	194.851	91.0215
chr17	34122215	34122487	136	0.86124	6.65644	3.73703e-06	Uninfected_unique	135.962	74.8443
chr17	35925801	35926059	129	1.39962	6.1616	1.78826e-09	Uninfected_unique	116.276	44.072
chr17	36184195	36184500	153	0.48005	6.87214	0.0010449	Uninfected_unique	138.349	99.1895
chr17	36254396	36254592	98	0.6219	5.73584	0.00338224	Uninfected_unique	66.1097	42.959
chr17	36294014	36294224	105	0.90046	7.69711	3.06307e-11	Uninfected_unique	283.527	151.89
chr17	36339741	36339986	123	0.73974	7.87472	4.43442e-09	Uninfected_unique	303.298	181.629
chr17	38082801	38083052	126	0.09987	8.66973	0.00834355	Uninfected_unique	421.581	393.384
chr17	38444694	38444917	112	0.1337	9.40738	0.00251348	Uninfected_unique	711.258	648.306
chr17	38532012	38532236	112	1.02158	6.85524	1.19224e-08	Uninfected_unique	164.967	81.2587
chr17	39957519	39957694	88	0.13325	9.01769	0.00408327	Uninfected_unique	542.814	494.925
chr17	40287828	40288035	104	0.15971	7.12004	0.015964	Uninfected_unique	147.023	131.615
chr17	40755823	40756023	100	-0.06247	7.53551	0.0189708	Uninfected_unique	181.557	189.591
chr17	41529636	41529884	124	1.40799	6.82754	5.86016e-14	Uninfected_unique	185.02	69.7221
chr17	41977888	41978164	138	0.84617	7.07756	2.49508e-07	Uninfected_unique	181.1	100.739
chr17	41995169	41995350	91	1.15794	6.49969	1.85196e-08	Uninfected_unique	135.173	60.5779
chr17	42646150	42646426	138	1.6437	6.34952	1.00989e-13	Uninfected_unique	144.144	46.1312
chr17	43309140	43309315	88	0.67079	7.60325	5.82192e-07	Uninfected_unique	245.341	154.114
chr17	43677701	43678040	170	0.73694	6.85953	1.35616e-05	Uninfected_unique	149.915	89.9505
chr17	44231691	44231947	128	0.16138	6.53233	0.022356	Uninfected_unique	97.8853	87.526
chr17	44344791	44344988	99	-0.02711	8.62449	0.0137646	Uninfected_unique	390.976	398.392
chr17	44450858	44451056	99	0.21841	7.845	0.00492611	Uninfected_unique	248.001	213.16
chr17	45126058	45126262	102	0.38689	6.65761	0.00465983	Uninfected_unique	115.444	88.2892
chr17	45216079	45216285	103	0.9654	6.31194	4.7249e-06	Uninfected_unique	111.017	56.856
chr17	45258884	45259078	97	0.71146	5.81638	0.00125456	Uninfected_unique	72.1091	44.0372
chr17	45475354	45475630	138	1.38315	6.6198	4.53106e-12	Uninfected_unique	158.834	60.8939
chr17	45498051	45498398	174	1.01139	6.30494	2.40464e-06	Uninfected_unique	112.255	55.6861
chr17	47075799	47075974	88	0.42789	7.92996	8.0021e-05	Uninfected_unique	282.852	210.258
chr17	47227403	47227624	111	1.36397	6.10716	6.35169e-09	Uninfected_unique	110.595	42.9675
chr17	47957972	47958186	107	0.94509	7.17821	3.67226e-09	Uninfected_unique	200.959	104.377
chr17	48504379	48504554	88	-0.04899	8.44322	0.0136328	Uninfected_unique	342.207	354.027
chr17	55209360	55209742	191	1.33147	7.40599	4.93689e-18	Uninfected_unique	269.049	106.91
chr17	55813174	55813353	90	0.23399	6.34802	0.0186273	Uninfected_unique	88.3412	75.1148
chr17	56151186	56151412	113	1.15755	6.65041	2.47722e-09	Uninfected_unique	150.038	67.258
chr17	56405498	56405700	101	0.53343	10.0969	4.15275e-19	Uninfected_unique	1317.55	910.311
chr17	56405730	56405921	96	0.60562	10.2695	1.97997e-26	Uninfected_unique	1522.58	1000.62
chr17	57190717	57190931	107	0.7413	6.46472	8.55721e-05	Uninfected_unique	114.196	68.3121
chr17	58629046	58629317	136	2.02377	6.92382	2.09062e-28	Uninfected_unique	244.842	60.2102
chr17	60729939	60730122	92	0.89	7.40548	2.43445e-09	Uninfected_unique	230.797	124.541
chr17	61600380	61600584	102	1.33857	6.57205	4.72564e-11	Uninfected_unique	151.307	59.8287
chr17	62005612	62005832	110	0.13713	9.52649	0.00197529	Uninfected_unique	773.391	703.265
chr17	62650747	62650922	88	0.57147	5.56978	0.00633062	Uninfected_unique	57.901	38.9633
chr17	62980944	62981127	92	0.08946	8.23837	0.0120358	Uninfected_unique	311.503	292.773
chr17	64265086	64265474	194	1.32346	5.90508	1.26401e-07	Uninfected_unique	94.7997	37.8796
chr17	64445738	64445925	94	0.23356	7.17291	0.00940945	Uninfected_unique	156.464	133.078
chr17	66098456	66098818	181	0.22031	8.94792	0.000741796	Uninfected_unique	533.031	457.543
chr17	66193469	66193739	135	0.76135	7.87227	1.57548e-09	Uninfected_unique	305.059	179.968
chr17	70767992	70768167	88	0.17962	7.76032	0.00828152	Uninfected_unique	230.741	203.729
chr17	72209092	72209267	88	0.11187	8.56535	0.00800532	Uninfected_unique	393.791	364.409
chr17	73401106	73401290	92	0.04148	9.41182	0.00933283	Uninfected_unique	691.009	671.424
chr17	74428844	74429097	127	0.42715	6.45043	0.00441781	Uninfected_unique	101.406	75.4189
chr17	75082324	75082584	130	0.10009	8.02888	0.0128032	Uninfected_unique	270.395	252.272
chr17	75456161	75456458	149	0.41015	8.24083	3.25833e-05	Uninfected_unique	348.715	262.424
chr17	75720939	75721234	148	0.85181	6.99966	3.27278e-07	Uninfected_unique	171.917	95.2571
chr17	76127464	76127673	105	0.10023	9.6899	0.00367346	Uninfected_unique	855.139	797.746
chr17	76162591	76162820	115	1.18168	6.95065	2.65293e-11	Uninfected_unique	186.301	82.1284
chr17	78193956	78194131	88	0.22008	7.88476	0.00467471	Uninfected_unique	255.079	218.99
chr17	78248362	78248573	106	1.66224	6.4434	8.85219e-15	Uninfected_unique	154.828	48.9175
chr17	78289526	78289713	94	1.38549	6.01882	1.02253e-08	Uninfected_unique	104.805	40.1151
chr17	78461099	78461370	136	0.93595	7.39566	4.82363e-10	Uninfected_unique	232.911	121.742
chr17	78674369	78674594	113	1.1554	6.52482	1.55552e-08	Uninfected_unique	137.427	61.6966
chr17	78711795	78712025	115	0.38331	8.79096	5.45743e-06	Uninfected_unique	505.867	387.837
chr17	78785445	78785681	118	0.79232	5.96292	0.000297274	Uninfected_unique	82.0869	47.3982
chr17	78937173	78937594	211	1.3541	7.45267	5.09127e-19	Uninfected_unique	280.085	109.563
chr17	79223141	79223323	91	1.14739	7.00026	3.54995e-11	Uninfected_unique	190.541	86.0179
chr17	79398777	79399010	117	1.81466	7.76713	4.92566e-40	Uninfected_unique	408.576	116.146
chr17	79399039	79399277	119	1.88629	7.75402	1.19074e-42	Uninfected_unique	415.057	112.274
chr17	79399302	79399567	133	1.8069	7.80899	1.50109e-40	Uninfected_unique	419.475	119.888
chr17	79650277	79650482	103	0.04049	9.48777	0.00915821	Uninfected_unique	728.111	707.96
chr17	79708224	79708513	145	1.36648	6.47345	5.03967e-11	Uninfected_unique	142.685	55.3384
chr17	79831360	79831551	96	-0.02026	8.41167	0.0150043	Uninfected_unique	338.155	342.937
chr17	80164100	80164284	92	0.22112	7.60308	0.00637942	Uninfected_unique	209.912	180.083
chr17	80417020	80417202	91	0.0902	9.85922	0.00374387	Uninfected_unique	958.291	900.211
chr17	80537587	80537892	153	0.87924	6.79744	8.55702e-07	Uninfected_unique	150.859	82.0152
chr17	80669728	80669933	103	0.96493	7.06162	8.50997e-09	Uninfected_unique	186.636	95.6143
chr17	80722729	80722910	91	0.65895	6.28922	0.000543703	Uninfected_unique	98.2711	62.2389
chr17	80743142	80743383	121	1.66987	6.86952	3.03305e-19	Uninfected_unique	208.58	65.5528
chr17	80961333	80961508	88	2.03452	6.24254	1.11691e-18	Uninfected_unique	153.256	37.4081
chr17	80980319	80980540	111	0.88938	7.25325	1.04048e-08	Uninfected_unique	207.64	112.094
chr17	80989877	80990061	92	0.78494	6.86453	5.06773e-06	Uninfected_unique	152.959	88.7737
chr17	81081918	81082350	216	1.47576	7.09021	1.09082e-17	Uninfected_unique	227.243	81.7037
chr17	81120526	81120781	128	1.50884	7.44575	3.57169e-23	Uninfected_unique	294.101	103.345
chr17	81140904	81141105	101	1.3226	7.64779	1.20972e-20	Uninfected_unique	317.165	126.807
chr17	81178976	81179193	109	1.28293	6.77955	9.33133e-12	Uninfected_unique	171.375	70.4284
chr16	66531	66743	106	1.29298	7.63981	7.11648e-20	Uninfected_unique	312.194	127.409
chr16	68873	69051	89	1.06891	7.34542	3.55402e-12	Uninfected_unique	235.548	112.281
chr16	441844	442066	111	0.57591	6.05385	0.00230791	Uninfected_unique	81.1098	54.4136
chr16	896579	896776	99	1.24044	6.4846	1.55534e-09	Uninfected_unique	137.646	58.2578
chr16	896863	897168	153	1.46603	6.46115	4.88538e-12	Uninfected_unique	146.44	53.0079
chr16	908481	909268	394	1.88944	7.18653	2.59749e-29	Uninfected_unique	280.382	75.6784
chr16	964498	964748	125	1.40908	6.32325	1.85141e-10	Uninfected_unique	130.49	49.136
chr16	1142628	1143177	275	3.08876	6.99974	1.022e-66	Uninfected_unique	373.281	43.876
chr16	1304918	1305105	94	1.20501	7.71417	2.02377e-18	Uninfected_unique	318.837	138.301
chr16	1970064	1970308	122	0.88456	7.14948	3.18624e-08	Uninfected_unique	192.907	104.488
chr16	2537151	2537471	160	0.82917	6.98059	8.90541e-07	Uninfected_unique	168.333	94.7468
chr16	3232592	3232767	88	0.95253	6.24755	8.92177e-06	Uninfected_unique	105.699	54.6173
chr16	3630280	3630499	110	0.51397	8.02074	4.61486e-06	Uninfected_unique	310.344	217.332
chr16	4394349	4394606	129	1.58637	7.01123	1.80935e-19	Uninfected_unique	223.544	74.442
chr16	4410716	4410918	101	1.07317	7.41524	1.25633e-12	Uninfected_unique	247.593	117.674
chr16	10952927	10953131	102	1.19422	6.3917	2.30587e-08	Uninfected_unique	127.011	55.5067
chr16	11429537	11429868	166	1.53824	6.52552	1.25287e-13	Uninfected_unique	157.002	54.0566
chr16	11440366	11440627	131	0.69237	7.80944	4.28136e-08	Uninfected_unique	285.159	176.467
chr16	11480893	11481090	99	0.84728	7.11666	1.37689e-07	Uninfected_unique	186.147	103.467
chr16	11679438	11679664	113	0.78499	7.40477	8.48317e-08	Uninfected_unique	222.439	129.094
chr16	12057042	12057229	94	0.54452	7.40628	4.61627e-05	Uninfected_unique	204.866	140.46
chr16	12120958	12121178	110	0.61744	6.2027	0.00106749	Uninfected_unique	91.229	59.4655
chr16	12128991	12129166	88	0.15344	7.08684	0.0168756	Uninfected_unique	143.366	128.901
chr16	12416850	12417166	158	0.62016	7.32655	1.21253e-05	Uninfected_unique	199.001	129.47
chr16	12434378	12434556	89	0.6682	6.58606	0.000163229	Uninfected_unique	121.109	76.2127
chr16	12474340	12474662	161	1.9526	6.36735	1.49258e-18	Uninfected_unique	162.427	41.9631
chr16	12642573	12642770	99	0.60144	7.27477	2.78331e-05	Uninfected_unique	190.743	125.718
chr16	13833921	13834096	88	0.56842	6.19307	0.00194283	Uninfected_unique	89.0955	60.082
chr16	14500043	14500223	90	0.93703	7.35723	5.58171e-10	Uninfected_unique	226.874	118.498
chr16	14701963	14702164	101	0.17016	7.13691	0.0150962	Uninfected_unique	149.292	132.682
chr16	15021950	15022245	148	2.04834	7.25153	9.18346e-36	Uninfected_unique	309.909	74.9242
chr16	15083636	15084070	217	0.23638	8.35623	0.00169708	Uninfected_unique	355.676	301.924
chr16	15121459	15121634	88	0.63993	6.31877	0.000593552	Uninfected_unique	99.6457	63.947
chr16	16042664	16042864	100	0.03281	8.36501	0.0149686	Uninfected_unique	333.47	325.972
chr16	17554720	17554907	94	0.10415	9.1271	0.00562873	Uninfected_unique	579.705	539.33
chr16	17562488	17562698	105	0.07661	8.34603	0.0125225	Uninfected_unique	334.146	316.865
chr16	18697613	18697878	133	1.17559	6.21244	1.50412e-07	Uninfected_unique	111.449	49.3386
chr16	18745334	18745549	108	1.09564	7.09868	8.08744e-11	Uninfected_unique	200.367	93.7574
chr16	18957623	18957798	88	0.35333	6.50845	0.00791527	Uninfected_unique	102.901	80.5485
chr16	20885918	20886099	91	0.6424	6.72335	0.000163857	Uninfected_unique	132.014	84.5744
chr16	21501472	21501660	94	0.28502	7.31057	0.00496058	Uninfected_unique	175.227	143.814
chr16	21847842	21848515	337	0.93225	9.07229	4.93726e-27	Uninfected_unique	743.617	389.685
chr16	21866824	21867026	101	0.7559	7.23795	7.30765e-07	Uninfected_unique	196.162	116.162
chr16	21939767	21939950	92	0.04152	7.60515	0.0192799	Uninfected_unique	197.528	191.924
chr16	24120280	24120614	167	1.31152	6.61189	4.89277e-11	Uninfected_unique	154.092	62.0832
chr16	24585734	24585959	113	0.94294	6.76812	2.91303e-07	Uninfected_unique	151.124	78.6105
chr16	25325214	25325414	100	1.02747	5.80741	2.87277e-05	Uninfected_unique	79.9566	39.2243
chr16	25771354	25771553	100	1.19089	6.31528	5.39281e-08	Uninfected_unique	120.319	52.7038
chr16	26385407	26386147	370	1.71393	6.54803	2.17481e-16	Uninfected_unique	169.483	51.6632
chr16	27150015	27150262	124	1.58689	6.5486	1.67595e-14	Uninfected_unique	162.247	54.01
chr16	27439831	27440051	110	0.46077	7.03579	0.000886046	Uninfected_unique	153.935	111.849
chr16	27984887	27985062	88	0.71915	6.4304	0.000126557	Uninfected_unique	110.659	67.2203
chr16	29049533	29049708	88	1.56019	5.95062	5.66894e-10	Uninfected_unique	106.206	36.015
chr16	29623486	29623661	88	0.53726	8.54793	3.54789e-08	Uninfected_unique	450.868	310.683
chr16	30180916	30181335	210	1.65211	7.11478	3.48809e-22	Uninfected_unique	245.714	78.1799
chr16	30181371	30181624	127	1.68008	6.89839	7.70719e-20	Uninfected_unique	213.55	66.6415
chr16	30354031	30354217	93	0.17127	8.5812	0.00385023	Uninfected_unique	406.422	360.927
chr16	30760403	30760578	88	0.22848	9.46126	0.000125481	Uninfected_unique	762.979	651.228
chr16	30887812	30888033	111	0.34303	7.3543	0.00218168	Uninfected_unique	184.288	145.289
chr16	31115868	31116236	184	1.10547	7.67249	2.09293e-15	Uninfected_unique	299.254	139.078
chr16	32007695	32007901	103	0.29033	7.02373	0.00679661	Uninfected_unique	143.897	117.667
chr16	32094881	32095117	118	0.69185	8.41421	3.8459e-11	Uninfected_unique	433.574	268.408
chr16	32102941	32103248	154	0.31823	7.63622	0.0017747	Uninfected_unique	222.141	178.169
chr16	32114755	32114946	96	0.67502	6.67107	0.000111504	Uninfected_unique	128.764	80.6476
chr16	32127904	32128218	157	1.47866	6.93871	1.81897e-16	Uninfected_unique	204.795	73.4851
chr16	32153240	32153463	112	0.41308	6.55665	0.00429153	Uninfected_unique	108.623	81.5781
chr16	32212340	32212586	123	1.15457	7.08398	1.0898e-11	Uninfected_unique	202.428	90.9307
chr16	32359573	32359810	119	1.02527	6.83729	1.4216e-08	Uninfected_unique	163.135	80.1513
chr16	32473077	32473312	118	0.45949	6.77987	0.00171346	Uninfected_unique	128.856	93.7096
chr16	32660964	32661151	94	0.96893	6.35575	3.30742e-06	Uninfected_unique	114.58	58.5373
chr16	32823126	32823319	97	1.0947	7.05557	1.36257e-10	Uninfected_unique	194.405	91.0268
chr16	32831922	32832103	91	0.71484	6.69986	4.75272e-05	Uninfected_unique	133.184	81.1456
chr16	32838320	32838495	88	0.56273	7.70374	8.34919e-06	Uninfected_unique	253.371	171.537
chr16	32838980	32839181	101	0.53273	7.81797	9.99716e-06	Uninfected_unique	271.411	187.612
chr16	32839220	32839414	97	0.43368	7.75037	0.000147679	Uninfected_unique	250.247	185.276
chr16	32851238	32851444	103	0.57131	7.3624	3.25384e-05	Uninfected_unique	200.583	134.993
chr16	32856663	32856891	114	1.26398	6.53665	5.5837e-10	Uninfected_unique	143.872	59.9073
chr16	33038959	33039233	137	1.27131	7.87817	1.85197e-22	Uninfected_unique	365.525	151.431
chr16	33152591	33152856	133	0.80271	6.94275	2.03438e-06	Uninfected_unique	162.478	93.1443
chr16	33524745	33525029	142	0.42691	6.51305	0.00409878	Uninfected_unique	105.896	78.7711
chr16	33585386	33585596	105	0.17761	6.663	0.0184763	Uninfected_unique	107.769	95.2862
chr16	33847035	33847256	111	0.60021	6.28718	0.00102549	Uninfected_unique	96.1547	63.4292
chr16	34173899	34174100	101	0.80697	5.63806	0.000891767	Uninfected_unique	65.8698	37.6499
chr16	34175550	34175726	88	1.14908	5.61125	1.82002e-05	Uninfected_unique	72.7961	32.8247
chr16	46482659	46482847	94	0.32965	6.45663	0.00967752	Uninfected_unique	98.4593	78.3469
chr16	46823401	46823582	91	-0.0056	9.02817	0.0123204	Uninfected_unique	521.083	523.11
chr16	46966733	46967081	174	0.75196	7.11632	2.0392e-06	Uninfected_unique	180.056	106.916
chr16	47215113	47215455	171	1.37578	6.60307	5.28872e-12	Uninfected_unique	156.602	60.3457
chr16	47527353	47527539	93	-0.28673	8.89054	0.0001255	Uninfected_unique	429.697	524.175
chr16	47527727	47528120	197	-0.22797	8.29327	0.0023605	Uninfected_unique	289.875	339.497
chr16	48227576	48227788	106	0.45773	6.42147	0.00369667	Uninfected_unique	100.45	73.1408
chr16	48936571	48936765	97	1.28748	7.11194	3.62438e-14	Uninfected_unique	216.119	88.5365
chr16	50280338	50280592	127	0.49026	8.38135	9.94021e-07	Uninfected_unique	395.211	281.35
chr16	51048741	51048920	90	0.40953	6.80626	0.00275777	Uninfected_unique	128.982	97.1064
chr16	53731962	53732217	128	1.29025	6.61465	1.19601e-10	Uninfected_unique	153.253	62.6623
chr16	54950314	54950495	91	1.30834	5.63515	2.05308e-06	Uninfected_unique	78.2121	31.5809
chr16	56773225	56773623	199	1.71578	6.76443	5.71576e-19	Uninfected_unique	197.037	59.9854
chr16	57015328	57015503	88	0.27416	7.20977	0.00621196	Uninfected_unique	162.788	134.614
chr16	57044856	57045102	123	0.5929	6.27085	0.00123832	Uninfected_unique	94.8319	62.8744
chr16	57060512	57060730	109	0.89043	7.00967	1.51162e-07	Uninfected_unique	175.446	94.645
chr16	57075127	57075316	95	0.16447	9.07913	0.00205852	Uninfected_unique	572.593	510.899
chr16	57234568	57234786	109	1.70581	6.7597	8.76268e-19	Uninfected_unique	195.714	59.996
chr16	57235054	57235398	172	1.58443	6.7414	3.5686e-16	Uninfected_unique	185.287	61.785
chr16	58018762	58019034	136	1.12869	6.98217	8.01017e-11	Uninfected_unique	186.951	85.4984
chr16	67278729	67278937	104	0.71185	8.68957	2.08541e-13	Uninfected_unique	528.403	322.609
chr16	68001379	68001574	98	0.10309	8.38911	0.0100292	Uninfected_unique	347.448	323.487
chr16	68197238	68197729	246	1.3621	6.54234	3.14732e-11	Uninfected_unique	149.437	58.1332
chr16	68221743	68221963	110	1.13732	6.42176	5.93555e-08	Uninfected_unique	127.153	57.8041
chr16	70085321	70086035	357	1.54023	7.27564	1.87695e-21	Uninfected_unique	264.249	90.8569
chr16	70258560	70258837	139	1.24845	6.34259	1.01106e-08	Uninfected_unique	125.089	52.6501
chr16	70465270	70465450	90	0.06497	9.38366	0.00779365	Uninfected_unique	683.191	653.107
chr16	70507690	70507905	108	0.92	7.1204	1.84787e-08	Uninfected_unique	191.394	101.153
chr16	70557010	70557221	106	-0.036	8.34839	0.0148709	Uninfected_unique	321.882	330.016
chr16	70958650	70958901	126	0.73589	6.31263	0.000186069	Uninfected_unique	102.578	61.5926
chr16	72172500	72172726	113	1.02498	6.14097	3.49087e-06	Uninfected_unique	100.668	49.4699
chr16	75285474	75285690	108	1.06493	7.7903	1.61609e-15	Uninfected_unique	320.186	153.047
chr16	75529334	75529509	88	0.81515	6.86989	2.29576e-06	Uninfected_unique	155.144	88.1761
chr16	78783637	78783843	103	0.88853	6.23199	2.62989e-05	Uninfected_unique	102.271	55.2432
chr16	80276798	80277222	212	1.46662	6.65941	1.52477e-13	Uninfected_unique	168.047	60.8042
chr16	80277496	80277812	158	1.35057	6.92039	1.0068e-13	Uninfected_unique	193.431	75.8515
chr16	81437665	81437901	118	0.09489	7.96157	0.0133693	Uninfected_unique	257.605	241.207
chr16	81553462	81553763	151	0.64525	7.5607	1.69932e-06	Uninfected_unique	236.112	150.965
chr16	81829739	81829914	88	0.09175	7.68424	0.0160191	Uninfected_unique	212.323	199.24
chr16	81844498	81844841	172	0.10259	7.76829	0.0142456	Uninfected_unique	225.907	210.401
chr16	81871071	81871268	99	0.00647	8.72904	0.0136635	Uninfected_unique	425.282	423.379
chr16	84029554	84029733	90	0.97627	6.71103	1.93981e-07	Uninfected_unique	146.948	74.6927
chr16	84084851	84085026	88	0.68665	6.93778	2.48678e-05	Uninfected_unique	155.536	96.6337
chr16	84760315	84760506	96	0.04617	7.39425	0.0209272	Uninfected_unique	170.939	165.555
chr16	84963951	84964160	105	1.22745	7.02904	1.10211e-12	Uninfected_unique	199.849	85.3498
chr16	84997676	84997932	128	1.38583	6.40779	1.43929e-10	Uninfected_unique	137.254	52.5229
chr16	85135961	85136153	96	0.24364	7.67258	0.00481722	Uninfected_unique	221.998	187.502
chr16	85342639	85342817	89	-0.30532	8.66758	0.000151296	Uninfected_unique	365.802	452.019
chr16	85445301	85445596	148	1.45844	7.62429	2.66644e-24	Uninfected_unique	327.082	119.021
chr16	85590486	85590665	90	0.20039	8.32161	0.00324955	Uninfected_unique	342.938	298.464
chr16	85605388	85605597	105	0.58399	7.51096	1.27695e-05	Uninfected_unique	223.318	148.979
chr16	85902183	85902405	111	0.50958	6.45708	0.00203594	Uninfected_unique	104.827	73.6335
chr16	86029177	86029414	119	0.60478	8.3418	1.01784e-08	Uninfected_unique	400.093	263.09
chr16	86044492	86044726	117	0.65595	7.40833	3.25239e-06	Uninfected_unique	213.236	135.332
chr16	86452945	86453331	193	1.19905	5.95062	8.49072e-07	Uninfected_unique	93.7109	40.8169
chr16	86497887	86498129	121	1.09491	6.54731	3.87722e-08	Uninfected_unique	136.69	63.9936
chr16	87009077	87009252	88	0.70679	6.21744	0.000361839	Uninfected_unique	95.0645	58.2443
chr16	87251546	87251745	100	2.11278	6.95283	4.10114e-31	Uninfected_unique	257.641	59.5669
chr16	87251902	87252272	185	2.09187	6.86072	5.2347e-29	Uninfected_unique	239.961	56.2891
chr16	87255666	87256103	219	1.36745	6.45927	1.04943e-10	Uninfected_unique	141.337	54.7788
chr16	87840095	87840331	118	0.13448	9.61533	0.00184659	Uninfected_unique	821.758	748.62
chr16	87890124	87890300	88	0.33882	7.70536	0.00112266	Uninfected_unique	234.716	185.587
chr16	88110636	88110831	98	1.02272	6.46185	4.60217e-07	Uninfected_unique	125.645	61.8409
chr16	88226519	88226751	116	1.27798	6.68354	5.14185e-11	Uninfected_unique	160.067	66.0071
chr16	88302902	88303084	91	0.39633	6.7668	0.0034847	Uninfected_unique	124.929	94.9197
chr16	88381651	88381875	112	1.41942	7.01438	7.5893e-16	Uninfected_unique	211.438	79.0487
chr16	88613743	88614008	133	1.94228	6.9988	1.15083e-27	Uninfected_unique	250.721	65.2389
chr16	88779320	88779701	191	1.29381	7.78387	1.30785e-21	Uninfected_unique	345.077	140.747
chr16	89049781	89049979	99	0.48269	9.03991	4.86841e-09	Uninfected_unique	622.209	445.279
chr16	89487530	89488079	275	1.2902	6.62737	5.92569e-11	Uninfected_unique	154.608	63.2183
chr16	89591616	89591930	157	0.43361	7.30281	0.000698632	Uninfected_unique	183.497	135.863
chr16	89654296	89654613	159	1.91707	6.9989	6.92506e-27	Uninfected_unique	248.557	65.8159
chr16	89714507	89714821	157	1.50101	7.0022	1.70455e-17	Uninfected_unique	215.673	76.1987
chr16	90067559	90067773	107	0.92565	7.37791	9.8676e-10	Uninfected_unique	229.243	120.684
chr16	90074980	90075226	123	0.71309	8.79426	2.67175e-14	Uninfected_unique	568.417	346.741
chr16	90158787	90158978	96	0.59337	7.28949	2.89477e-05	Uninfected_unique	192.161	127.363
chr16	90184098	90184308	105	0.62364	8.48671	8.37822e-10	Uninfected_unique	445.268	288.993
chr16	90197267	90197444	89	0.69253	7.73355	7.56311e-08	Uninfected_unique	270.562	167.415
chr15	20305752	20306526	387	1.25892	8.53905	2.39688e-33	Uninfected_unique	575.435	240.449
chr15	20309992	20310303	156	0.9604	8.63352	1.25707e-21	Uninfected_unique	553.991	284.704
chr15	20353309	20353514	103	0.91253	7.15521	1.43583e-08	Uninfected_unique	195.561	103.892
chr15	20747021	20747280	130	0.94336	6.58402	9.78701e-07	Uninfected_unique	133.038	69.1827
chr15	21315337	21315555	109	0.94802	8.74287	9.79014e-23	Uninfected_unique	595.055	308.443
chr15	21316530	21316757	114	0.92985	8.92039	1.68811e-24	Uninfected_unique	668.746	351.034
chr15	21318032	21318228	98	1.0564	7.71416	1.33759e-14	Uninfected_unique	302.829	145.609
chr15	21359971	21360148	89	0.81567	7.00718	8.1004e-07	Uninfected_unique	170.664	96.9618
chr15	21904376	21904592	108	0.55583	7.20885	0.000102582	Uninfected_unique	179.366	122.017
chr15	21904766	21905225	230	0.78267	7.25739	3.08432e-07	Uninfected_unique	200.676	116.651
chr15	21905320	21905609	145	0.9033	6.92962	1.4923e-07	Uninfected_unique	166.718	89.1381
chr15	22692529	22692729	100	0.85201	7.04867	2.73273e-07	Uninfected_unique	177.869	98.5419
chr15	22707290	22707479	95	0.31064	7.44232	0.00271319	Uninfected_unique	193.695	156.173
chr15	22823427	22823711	142	1.51795	7.66545	6.81572e-27	Uninfected_unique	343.562	119.965
chr15	23264251	23264508	129	0.58007	6.98985	0.000161211	Uninfected_unique	155.405	103.955
chr15	23377361	23377583	111	-0.14948	9.37503	0.00182556	Uninfected_unique	630.473	699.301
chr15	23434855	23435104	125	1.0031	6.99465	4.40389e-09	Uninfected_unique	180.543	90.0778
chr15	26179168	26179343	88	0.4965	6.17243	0.00393649	Uninfected_unique	85.6677	60.7234
chr15	26961890	26962111	111	0.64525	6.53237	0.000274797	Uninfected_unique	115.76	74.015
chr15	28315281	28315790	255	1.14154	6.56944	1.09747e-08	Uninfected_unique	141.064	63.941
chr15	28663807	28664217	205	1.12301	6.9887	1.27138e-10	Uninfected_unique	187.43	86.0555
chr15	28702377	28702632	128	1.09568	7.51554	8.06494e-14	Uninfected_unique	267.497	125.166
chr15	30241329	30242371	521	1.7553	7.35163	1.37659e-28	Uninfected_unique	300.096	88.8919
chr15	30396176	30396351	88	0.77575	6.87795	5.41984e-06	Uninfected_unique	153.897	89.8891
chr15	30427141	30427316	88	0.86091	6.79842	1.55676e-06	Uninfected_unique	150.006	82.594
chr15	30696760	30696935	88	0.86834	6.63824	3.441e-06	Uninfected_unique	134.588	73.7244
chr15	30864769	30864961	96	0.72825	7.32872	8.12691e-07	Uninfected_unique	206.908	124.897
chr15	31492959	31493134	88	0.36925	6.82754	0.00421117	Uninfected_unique	129.084	99.9348
chr15	31633734	31633917	92	0.48418	7.93839	1.71626e-05	Uninfected_unique	290.115	207.404
chr15	32322399	32322574	88	1.04681	6.43359	3.62577e-07	Uninfected_unique	124.241	60.1372
chr15	32781568	32781751	92	0.12159	6.48559	0.0259867	Uninfected_unique	93.467	85.9124
chr15	33486896	33487123	114	0.8555	6.07693	8.27976e-05	Uninfected_unique	90.8037	50.1848
chr15	34728866	34729098	116	0.01223	7.98114	0.0176566	Uninfected_unique	253.748	251.606
chr15	34846451	34846832	191	0.4043	6.84418	0.00288637	Uninfected_unique	132.177	99.8735
chr15	35948221	35948732	256	1.60297	6.67041	3.88426e-16	Uninfected_unique	177.527	58.4417
chr15	35948752	35949128	188	1.6284	6.61225	1.12506e-15	Uninfected_unique	172.022	55.64
chr15	38544334	38544557	112	-0.30094	7.70896	0.00216484	Uninfected_unique	188.509	232.233
chr15	38544579	38544868	145	-0.19812	7.62193	0.00798507	Uninfected_unique	183.912	210.984
chr15	40388214	40388445	116	0.32626	7.99328	0.000741693	Uninfected_unique	285.315	227.567
chr15	40803409	40803730	161	0.51839	7.19108	0.000202477	Uninfected_unique	174.886	122.097
chr15	40803755	40804068	157	0.54043	7.22069	0.000129929	Uninfected_unique	179.882	123.681
chr15	40975092	40975278	93	1.77227	7.07805	1.43046e-24	Uninfected_unique	249.723	73.1059
chr15	40975338	40975865	264	1.84626	7.04689	8.17934e-26	Uninfected_unique	250.735	69.7325
chr15	41025258	41025447	95	1.27851	6.38729	3.0439e-09	Uninfected_unique	130.377	53.7441
chr15	41220245	41220427	91	1.08914	7.71908	1.64946e-15	Uninfected_unique	307.331	144.458
chr15	41222807	41222987	90	0.8373	7.45352	8.69657e-09	Uninfected_unique	234.293	131.131
chr15	41674671	41674864	97	1.37546	7.47692	7.05387e-20	Uninfected_unique	286.949	110.599
chr15	41675167	41675719	276	1.55338	7.31591	1.97087e-22	Uninfected_unique	272.97	93.0039
chr15	41787645	41787842	99	0.79943	7.47066	2.28414e-08	Uninfected_unique	234.002	134.452
chr15	43368926	43369351	213	1.28696	6.47873	6.48992e-10	Uninfected_unique	139.315	57.0933
chr15	43397716	43397923	104	-0.05743	8.28005	0.0142445	Uninfected_unique	304.719	317.094
chr15	43459354	43459535	91	0.70561	6.55011	9.12536e-05	Uninfected_unique	119.67	73.3795
chr15	44039197	44039391	97	0.02318	9.32221	0.0107218	Uninfected_unique	645.288	635.003
chr15	45016906	45017084	89	-0.46621	8.19566	6.84984e-06	Uninfected_unique	249.441	344.597
chr15	45585143	45585331	94	1.15852	6.44573	2.26017e-08	Uninfected_unique	130.237	58.3423
chr15	46026580	46026765	93	0.74662	6.23635	0.000184558	Uninfected_unique	97.6576	58.2037
chr15	47425301	47425476	88	1.47503	6.68949	6.11227e-14	Uninfected_unique	172.088	61.9046
chr15	47425516	47425740	112	1.49231	6.53317	5.28829e-13	Uninfected_unique	155.344	55.216
chr15	48938074	48938249	88	0.39995	6.95661	0.00219609	Uninfected_unique	142.675	108.131
chr15	49842395	49842648	127	1.1597	6.6274	2.9448e-09	Uninfected_unique	147.774	66.1445
chr15	50450208	50450383	88	1.32312	6.08777	1.88828e-08	Uninfected_unique	107.585	42.9984
chr15	50710724	50710956	116	0.40657	6.63018	0.00398214	Uninfected_unique	114.045	86.0376
chr15	52455799	52455999	100	0.7337	6.5189	8.14907e-05	Uninfected_unique	118.254	71.1134
chr15	52515650	52515839	95	0.14517	7.53665	0.0133861	Uninfected_unique	195.258	176.566
chr15	52546573	52546813	120	0.8111	6.52126	1.74308e-05	Uninfected_unique	121.668	69.3445
chr15	55223939	55224135	98	1.13445	5.99824	1.59057e-06	Uninfected_unique	94.7113	43.1418
chr15	56403022	56403204	91	1.36543	6.28594	1.17158e-09	Uninfected_unique	125.249	48.6115
chr15	57795553	57795770	109	0.10568	6.43033	0.0273728	Uninfected_unique	89.46	83.1411
chr15	59978629	59978842	107	0.03903	6.77798	0.0263821	Uninfected_unique	111.237	108.268
chr15	60642052	60642234	91	0.50676	6.26818	0.0031293	Uninfected_unique	91.8724	64.6599
chr15	60659030	60659259	115	1.61457	7.01395	7.97931e-20	Uninfected_unique	226.165	73.8571
chr15	60659712	60660044	166	1.63631	6.76603	2.03163e-17	Uninfected_unique	191.897	61.7289
chr15	66238070	66238256	93	1.04448	6.64357	6.16345e-08	Uninfected_unique	143.59	69.6152
chr15	66248686	66248922	118	0.35393	6.90516	0.00449787	Uninfected_unique	135.498	106.02
chr15	66256432	66256660	114	0.72816	6.91585	1.3725e-05	Uninfected_unique	155.409	93.8165
chr15	68145903	68146144	121	0.59618	7.16888	4.9873e-05	Uninfected_unique	176.922	117.034
chr15	68155189	68155483	147	-0.00096	8.43606	0.01516	Uninfected_unique	346.228	346.459
chr15	68427301	68427514	107	2.08119	5.89232	1.73075e-15	Uninfected_unique	122.184	28.8745
chr15	68950597	68950772	88	0.86439	6.39969	1.81304e-05	Uninfected_unique	113.921	62.5742
chr15	69151898	69152677	390	1.8706	6.76976	2.64688e-22	Uninfected_unique	208.667	57.0621
chr15	69256535	69256803	134	1.07552	6.73657	7.97579e-09	Uninfected_unique	154.807	73.4561
chr15	69257062	69257312	125	0.8609	6.8916	6.56476e-07	Uninfected_unique	160.014	88.1049
chr15	70550100	70550463	182	0.73182	7.61708	6.07089e-08	Uninfected_unique	252.999	152.342
chr15	70611003	70611225	111	1.11955	8.42553	4.3097e-25	Uninfected_unique	506.811	233.254
chr15	72061359	72061629	135	2.03165	5.65296	5.93663e-13	Uninfected_unique	101.743	24.8838
chr15	72393839	72394025	93	1.45069	6.72866	6.7236e-14	Uninfected_unique	175.339	64.1472
chr15	72689191	72689433	121	1.21268	6.59058	9.38993e-10	Uninfected_unique	146.72	63.3047
chr15	73099214	73099419	103	1.26882	6.59162	1.99996e-10	Uninfected_unique	149.71	62.1296
chr15	74696334	74696907	287	0.96538	8.60149	1.80643e-21	Uninfected_unique	542.764	277.973
chr15	75075900	75076098	99	0.21932	9.01487	0.000611012	Uninfected_unique	558.158	479.441
chr15	75081808	75081987	90	0.43379	9.45277	1.52049e-09	Uninfected_unique	814.44	602.942
chr15	75773334	75773613	140	1.10121	6.44592	1.07071e-07	Uninfected_unique	127.692	59.5205
chr15	75795690	75795915	113	1.71918	6.86847	1.91152e-20	Uninfected_unique	212.021	64.3951
chr15	75796120	75796445	163	1.90661	7.04116	2.48753e-27	Uninfected_unique	255.02	68.0185
chr15	78219138	78219336	99	0.91469	6.70304	8.47752e-07	Uninfected_unique	143.051	75.8825
chr15	78463784	78463966	91	0.58974	6.43922	0.000937848	Uninfected_unique	106.454	70.7349
chr15	79731683	79731888	103	1.12171	6.17027	7.51939e-07	Uninfected_unique	106.236	48.8205
chr15	81294240	81294445	103	0.28754	9.11878	4.78358e-05	Uninfected_unique	614.194	503.208
chr15	83154820	83155083	132	1.32716	5.69576	8.52998e-07	Uninfected_unique	82.1017	32.7218
chr15	83316547	83316731	92	1.66399	6.69937	2.10453e-17	Uninfected_unique	184.998	58.3789
chr15	83457110	83457754	322	1.18929	6.68908	5.60245e-10	Uninfected_unique	155.819	68.3294
chr15	83655262	83655437	88	-0.10899	8.43157	0.00895774	Uninfected_unique	332.469	358.559
chr15	83666579	83666785	103	1.46662	6.65941	1.52477e-13	Uninfected_unique	168.047	60.8042
chr15	84490501	84491018	259	1.43756	6.78329	4.32892e-14	Uninfected_unique	181.279	66.9267
chr15	85060003	85060255	126	0.97641	6.5763	5.03958e-07	Uninfected_unique	133.853	68.0298
chr15	85304874	85305049	88	0.99538	6.17554	5.89136e-06	Uninfected_unique	102.057	51.1921
chr15	85783438	85783712	137	0.78621	6.4008	5.24811e-05	Uninfected_unique	110.961	64.3423
chr15	85999799	85999986	94	-0.03699	7.75225	0.0186575	Uninfected_unique	212.859	218.387
chr15	86250763	86250995	116	-0.25525	7.98416	0.00242111	Uninfected_unique	231.768	276.624
chr15	86337427	86337653	113	0.03374	9.52963	0.00940696	Uninfected_unique	747.796	730.51
chr15	90397495	90397758	132	1.5707	6.8933	1.30074e-17	Uninfected_unique	204.882	68.9725
chr15	90397852	90398121	135	1.50282	6.96092	4.90874e-17	Uninfected_unique	209.721	74.0029
chr15	90411282	90412157	438	2.07548	7.04984	5.77337e-32	Uninfected_unique	272.022	64.539
chr15	90577800	90577975	88	0.60186	7.00777	7.65716e-05	Uninfected_unique	158.54	104.462
chr15	90605691	90605941	125	0.70804	8.25571	1.48428e-10	Uninfected_unique	390.649	239.136
chr15	91073708	91073946	119	0.16248	7.63406	0.0108932	Uninfected_unique	210.154	187.77
chr15	92292586	92292883	149	1.46025	6.7821	1.08418e-14	Uninfected_unique	182.56	66.3477
chr15	92292978	92293221	122	1.49255	6.87903	6.01973e-16	Uninfected_unique	197.445	70.1687
chr15	92640875	92641082	104	0.49261	6.54423	0.00195561	Uninfected_unique	110.702	78.68
chr15	93311481	93311679	99	1.67173	6.73016	8.1249e-18	Uninfected_unique	189.496	59.4784
chr15	93579258	93579433	88	1.01233	7.13273	9.1029e-10	Uninfected_unique	199.313	98.8086
chr15	99192028	99192203	88	-0.13939	9.59665	0.00165276	Uninfected_unique	737.733	812.568
chr15	99192292	99192467	88	-0.14669	9.403	0.00187117	Uninfected_unique	643.437	712.302
chr15	99394248	99394442	97	0.0685	7.25586	0.0205315	Uninfected_unique	156.51	149.252
chr15	100106613	100106824	106	-0.18618	9.22399	0.000972264	Uninfected_unique	560.628	637.853
chr15	101250492	101250726	117	1.49988	6.7395	9.76023e-15	Uninfected_unique	179.699	63.5385
chr15	101554018	101554233	108	0.9543	6.78362	1.67823e-07	Uninfected_unique	153.359	79.1474
chr15	101791503	101791678	88	-0.12019	8.9426	0.00541711	Uninfected_unique	471.955	512.957
chr15	101816738	101816924	93	0.1026	9.25552	0.00535813	Uninfected_unique	633.333	589.856
chr15	102082961	102083143	91	1.10954	6.9638	2.83434e-10	Uninfected_unique	183.364	84.9787
chr15	102433459	102433701	121	0.7226	7.42259	5.71201e-07	Uninfected_unique	220.386	133.555
chr15	102433810	102433987	89	0.66421	7.43507	1.94205e-06	Uninfected_unique	217.848	137.469
chr15	102452573	102452782	105	0.64945	6.77312	9.82449e-05	Uninfected_unique	136.982	87.3294
chr15	102506150	102506356	103	1.09025	8.3592	7.10362e-23	Uninfected_unique	479.147	225.046
chr14	19506924	19507162	119	0.96433	7.59995	8.38151e-12	Uninfected_unique	270.994	138.889
chr14	19626106	19626491	193	0.97129	7.28511	4.6819e-10	Uninfected_unique	218.389	111.389
chr14	19687182	19687431	125	1.24441	6.99003	1.53835e-12	Uninfected_unique	195.664	82.586
chr14	19855816	19856079	132	0.84308	6.74087	3.35985e-06	Uninfected_unique	143.252	79.8561
chr14	19888876	19889062	93	1.4568	7.71148	1.85654e-25	Uninfected_unique	347.262	126.508
chr14	19925715	19925893	89	0.31088	7.04018	0.00502308	Uninfected_unique	146.588	118.172
chr14	20066347	20066604	129	1.1376	7.34281	1.90342e-13	Uninfected_unique	240.786	109.441
chr14	20778121	20778526	203	1.58562	6.75483	1.58392e-16	Uninfected_unique	187.097	62.3371
chr14	20778634	20778829	98	1.65458	6.62467	3.24808e-16	Uninfected_unique	175.091	55.6142
chr14	20974361	20974813	226	1.27907	7.43118	4.40578e-17	Uninfected_unique	268.861	110.787
chr14	20974923	20975327	202	1.35052	7.34785	7.52332e-18	Uninfected_unique	260.134	102.012
chr14	22938614	22938827	107	0.27625	8.0221	0.00159328	Uninfected_unique	286.07	236.218
chr14	22944123	22944322	100	0.19084	7.78065	0.00732789	Uninfected_unique	234.927	205.819
chr14	22961085	22961320	118	0.2277	7.35224	0.00787051	Uninfected_unique	176.814	150.998
chr14	22991409	22991599	95	0.28219	6.53338	0.0122675	Uninfected_unique	102.145	83.9981
chr14	23031268	23031473	103	0.12252	8.33419	0.00855887	Uninfected_unique	336.73	309.314
chr14	23034573	23034758	93	0.46622	7.1918	0.00047093	Uninfected_unique	171.839	124.387
chr14	23106668	23106931	132	1.53991	6.91278	4.96612e-17	Uninfected_unique	205.463	70.6602
chr14	23236457	23236632	88	-0.08872	8.33472	0.0115174	Uninfected_unique	313.074	332.931
chr14	23291812	23292043	116	0.60871	7.81253	7.87606e-07	Uninfected_unique	277.604	182.048
chr14	23701418	23701600	91	1.21771	6.3433	1.42003e-08	Uninfected_unique	123.825	53.2402
chr14	23791212	23791415	102	0.02684	10.1514	0.00759095	Uninfected_unique	1147.89	1126.73
chr14	24470824	24471130	153	0.19782	6.55878	0.0185699	Uninfected_unique	100.963	88.0267
chr14	25166310	25166574	132	0.95221	6.44137	1.939e-06	Uninfected_unique	120.884	62.4775
chr14	31707556	31707750	97	1.57208	5.76031	3.7226e-09	Uninfected_unique	93.4647	31.4343
chr14	34547917	34548145	114	0.8058	6.25039	9.09998e-05	Uninfected_unique	100.656	57.5798
chr14	35508589	35508837	124	1.20518	6.68487	5.60245e-10	Uninfected_unique	156.223	67.7562
chr14	35836688	35836887	100	0.45641	7.89544	4.48298e-05	Uninfected_unique	278.908	203.267
chr14	36417303	36417701	199	0.30233	6.67953	0.00860533	Uninfected_unique	113.827	92.3068
chr14	36446025	36446587	281	1.4633	7.02518	6.11193e-17	Uninfected_unique	216.291	78.4407
chr14	36446766	36447081	158	1.43683	7.08134	5.0474e-17	Uninfected_unique	222.823	82.306
chr14	38024660	38024915	128	1.25864	6.37786	4.30116e-09	Uninfected_unique	128.639	53.7629
chr14	38548620	38548797	89	-0.40894	7.14974	0.00125844	Uninfected_unique	123.235	163.621
chr14	42142842	42143027	93	1.4921	6.79722	2.28966e-15	Uninfected_unique	186.531	66.3107
chr14	45858400	45858987	294	1.55607	6.89782	3.80932e-17	Uninfected_unique	204.486	69.5407
chr14	46104710	46105029	160	1.23364	6.77861	7.44213e-11	Uninfected_unique	168.363	71.5952
chr14	50807782	50807957	88	0.99943	6.12884	6.31013e-06	Uninfected_unique	98.945	49.492
chr14	51027268	51027604	168	0.89637	6.69435	1.44229e-06	Uninfected_unique	141.292	75.9072
chr14	51560642	51560820	89	0.65533	7.60591	9.2024e-07	Uninfected_unique	244.48	155.228
chr14	53575294	53575490	98	-0.45946	7.98814	2.96684e-05	Uninfected_unique	216.528	297.732
chr14	54670164	54670536	186	1.38845	6.9173	1.88772e-14	Uninfected_unique	195.568	74.702
chr14	54670810	54671089	140	1.52356	6.68643	9.97426e-15	Uninfected_unique	174.636	60.7432
chr14	57800448	57800738	145	1.41842	6.51259	9.76037e-12	Uninfected_unique	149.272	55.8459
chr14	60559319	60559536	109	-0.09035	10.174	0.00270465	Uninfected_unique	1119.62	1191.98
chr14	60981533	60982061	264	0.57582	7.11834	9.3085e-05	Uninfected_unique	169.63	113.806
chr14	62865423	62865624	101	0.582	6.69468	0.0004237	Uninfected_unique	126.736	84.6642
chr14	63512100	63512275	88	0.50276	6.57936	0.001454	Uninfected_unique	113.83	80.3363
chr14	63632176	63632381	103	0.89942	6.85473	3.90613e-07	Uninfected_unique	158.072	84.7429
chr14	63632496	63632797	151	1.02458	6.77609	3.23535e-08	Uninfected_unique	156.322	76.8408
chr14	64130178	64130511	167	0.40493	7.07812	0.00170185	Uninfected_unique	155.48	117.43
chr14	64405592	64405769	89	0.12362	7.20097	0.0174426	Uninfected_unique	153.573	140.962
chr14	65362027	65362490	232	1.60245	7.27028	6.4435e-23	Uninfected_unique	269.008	88.589
chr14	65362511	65362686	88	1.67985	7.14794	2.51198e-23	Uninfected_unique	253.856	79.2322
chr14	65674904	65675100	98	0.00435	7.635	0.0199846	Uninfected_unique	199.076	198.477
chr14	65784864	65785159	148	-0.00259	8.70712	0.0137936	Uninfected_unique	417.556	418.306
chr14	65800975	65801358	192	0.16965	7.5306	0.0107911	Uninfected_unique	196.097	174.342
chr14	66100200	66100423	112	1.01785	6.4332	7.37042e-07	Uninfected_unique	122.967	60.7274
chr14	66159369	66159629	130	1.12551	6.49753	3.50622e-08	Uninfected_unique	133.462	61.171
chr14	67012114	67012321	104	1.27615	6.82087	8.07934e-12	Uninfected_unique	175.941	72.6452
chr14	67012542	67012808	133	1.20917	6.86369	4.46297e-11	Uninfected_unique	177.082	76.5911
chr14	67511337	67511512	88	0.40312	6.35065	0.00627038	Uninfected_unique	93.8451	70.9677
chr14	67807876	67808299	212	1.3094	6.35605	1.4784e-09	Uninfected_unique	128.957	52.0328
chr14	69365608	69365980	186	0.84405	7.05287	2.73273e-07	Uninfected_unique	177.897	99.1022
chr14	70826665	70826863	99	0.3872	7.29794	0.00139665	Uninfected_unique	179.961	137.6
chr14	71134376	71134551	88	0.78694	6.72419	8.95237e-06	Uninfected_unique	138.877	80.489
chr14	73650847	73651509	331	1.44297	7.12203	1.20364e-17	Uninfected_unique	229.685	84.4804
chr14	73740618	73740826	104	0.81017	6.53237	1.87548e-05	Uninfected_unique	122.569	69.9031
chr14	73777865	73778068	102	0.15484	6.35292	0.0243696	Uninfected_unique	86.2433	77.4665
chr14	73931808	73931983	88	0.56611	6.35777	0.00118072	Uninfected_unique	99.7901	67.4018
chr14	74231729	74231914	93	0.13422	7.74254	0.0120891	Uninfected_unique	224.357	204.425
chr14	75322408	75322665	129	0.16828	6.5808	0.0210331	Uninfected_unique	101.472	90.3004
chr14	75936626	75936859	117	0.0172	9.75242	0.0092732	Uninfected_unique	867.68	857.397
chr14	75981681	75981880	100	0.47785	7.37463	0.000242497	Uninfected_unique	195.843	140.625
chr14	75982031	75982249	109	0.47209	7.28611	0.000368341	Uninfected_unique	183.821	132.52
chr14	76426694	76426876	91	0.32587	6.31399	0.0114887	Uninfected_unique	89.0735	71.0644
chr14	77288050	77288261	106	1.45064	6.35937	3.51256e-11	Uninfected_unique	135.739	49.6613
chr14	78009426	78009701	138	-0.23494	7.01963	0.0106238	Uninfected_unique	119.607	140.761
chr14	81423568	81423773	103	-0.10315	7.56439	0.016395	Uninfected_unique	182.634	196.171
chr14	81769091	81769266	88	-0.95856	7.47735	7.46052e-11	Uninfected_unique	127.829	248.419
chr14	85819407	85819584	89	0.8843	6.25911	2.20274e-05	Uninfected_unique	104.059	56.3741
chr14	87007224	87007521	149	0.23504	6.41173	0.0172138	Uninfected_unique	92.3634	78.4776
chr14	89134823	89135068	123	0.21355	7.57785	0.0068077	Uninfected_unique	205.732	177.426
chr14	89742958	89743135	89	0.28733	6.23742	0.0154436	Uninfected_unique	83.3485	68.2972
chr14	89827505	89827758	127	2.02126	7.44228	1.43301e-39	Uninfected_unique	350.412	86.3216
chr14	89827854	89828257	202	1.94687	7.57624	2.46569e-40	Uninfected_unique	374.722	97.1946
chr14	89895957	89896132	88	0.39521	7.44203	0.00091443	Uninfected_unique	199.416	151.631
chr14	89912025	89912247	111	0.79172	6.81297	4.87305e-06	Uninfected_unique	147.936	85.456
chr14	90035659	90035834	88	0.76929	6.47801	5.3999e-05	Uninfected_unique	116.376	68.2788
chr14	90168028	90168241	107	1.04734	6.60996	8.77769e-08	Uninfected_unique	140.422	67.9447
chr14	90348302	90348503	101	0.61488	6.332	0.000753354	Uninfected_unique	99.6944	65.0988
chr14	91759682	91759936	127	1.52	6.83428	4.13677e-16	Uninfected_unique	193.244	67.3815
chr14	92044734	92044909	88	0.7819	6.46018	5.05992e-05	Uninfected_unique	115.45	67.146
chr14	93185532	93185707	88	0.93666	6.08245	2.61308e-05	Uninfected_unique	93.7522	48.98
chr14	93377840	93378192	176	1.609	6.84063	1.25915e-17	Uninfected_unique	200.177	65.623
chr14	95785643	95785948	153	0.34522	7.96151	0.000492609	Uninfected_unique	280.94	221.153
chr14	95961560	95961757	99	-0.03734	8.06816	0.0164416	Uninfected_unique	264.934	271.881
chr14	97602491	97602666	88	1.39927	6.21585	9.02296e-10	Uninfected_unique	120.717	45.7663
chr14	97602713	97602914	101	1.32392	6.26624	3.45124e-09	Uninfected_unique	121.786	48.647
chr14	100539136	100539343	104	0.43393	7.26209	0.00074475	Uninfected_unique	178.41	132.067
chr14	100993088	100993318	115	0.93426	6.73323	4.13951e-07	Uninfected_unique	147.07	76.9634
chr14	101486123	101486298	88	1.17278	7.13528	2.4693e-12	Uninfected_unique	211.083	93.6294
chr14	101486342	101486898	278	1.0183	7.15924	4.26348e-10	Uninfected_unique	203.43	100.433
chr14	101504507	101504742	118	0.82923	6.61969	9.4324e-06	Uninfected_unique	131.08	73.7758
chr14	102258625	102258817	96	-0.0936	6.49163	0.0268827	Uninfected_unique	87.1138	92.953
chr14	103060992	103061186	97	0.16498	7.48777	0.0120706	Uninfected_unique	190.053	169.516
chr14	103143054	103143411	179	1.49868	7.02168	1.48644e-17	Uninfected_unique	218.429	77.297
chr14	103143821	103144147	163	1.4043	6.99718	2.32944e-15	Uninfected_unique	207.84	78.5223
chr14	104717750	104717986	118	1.93085	7.06422	3.77382e-28	Uninfected_unique	261.315	68.5362
chr14	104910533	104910725	96	0.98674	7.1126	1.93095e-09	Uninfected_unique	194.816	98.3075
chr14	105434903	105435089	93	1.1242	7.619	2.28146e-15	Uninfected_unique	290.239	133.149
chr14	105560130	105560360	115	1.37965	7.27483	9.11605e-18	Uninfected_unique	249.804	96.0028
chr14	105577932	105578194	131	1.70943	6.81358	1.98683e-19	Uninfected_unique	203.417	62.201
chr14	105696258	105696465	104	1.22982	7.85848	1.35399e-20	Uninfected_unique	355.422	151.542
chr14	105696655	105697090	218	1.31549	8.37995	1.03067e-32	Uninfected_unique	525.554	211.162
chr14	105721921	105722132	106	0.64771	7.19334	1.56249e-05	Uninfected_unique	183.19	116.929
chr14	105742778	105742961	92	0.73577	7.3693	4.99343e-07	Uninfected_unique	213.366	128.126
chr14	106045327	106045503	88	0.55696	10.0243	1.38352e-19	Uninfected_unique	1263.13	858.593
chr14	106049053	106049357	152	0.3514	9.81625	1.48887e-08	Uninfected_unique	1018.3	798.169
chr14	106083523	106084027	252	1.14934	7.82028	5.08614e-18	Uninfected_unique	336.614	151.756
chr14	106162345	106162557	106	0.22598	10.472	1.2042e-06	Uninfected_unique	1536.04	1313.34
chr14	106318747	106319104	179	0.45755	9.34403	8.95635e-10	Uninfected_unique	761.555	554.581
chr14	106610165	106610340	88	0.18945	5.79307	0.0303535	Uninfected_unique	59.2111	51.9246
chr14	106811006	106811224	109	0.40429	7.13693	0.00141504	Uninfected_unique	161.913	122.343
chr14	106994292	106994525	117	0.25777	8.00038	0.00224816	Uninfected_unique	279.997	234.183
chr14	107121961	107122145	92	0.10709	6.86087	0.0219574	Uninfected_unique	120.627	111.998
chr14	107163601	107163859	129	0.10864	6.92402	0.021655	Uninfected_unique	126.093	116.946
chr19	60362	60570	104	1.0012	7.07055	2.44866e-09	Uninfected_unique	190.171	95.0062
chr19	61384	61579	98	1.16488	7.39096	3.13844e-14	Uninfected_unique	251.323	112.09
chr19	411020	411278	129	1.18819	7.08249	2.53289e-12	Uninfected_unique	204.589	89.7845
chr19	459302	459480	89	1.87694	6.59391	3.84775e-20	Uninfected_unique	185.128	50.4031
chr19	518860	519150	145	1.72025	7.13702	7.78222e-24	Uninfected_unique	255.494	77.5414
chr19	524727	525212	243	1.54915	7.42673	9.5474e-24	Uninfected_unique	294.333	100.577
chr19	835359	835570	106	1.4921	6.79722	2.28966e-15	Uninfected_unique	186.531	66.3107
chr19	877773	877973	100	1.38338	7.9007	2.63351e-26	Uninfected_unique	385.982	147.955
chr19	878384	878592	104	1.50453	8.31148	6.48012e-40	Uninfected_unique	535.13	188.604
chr19	879641	879909	134	1.36068	8.14817	5.79165e-30	Uninfected_unique	454.618	177.028
chr19	919498	919705	104	0.45582	8.63979	7.38461e-07	Uninfected_unique	467.136	340.587
chr19	1049536	1049953	209	2.49508	7.00906	1.53592e-44	Uninfected_unique	305.833	54.2488
chr19	1141999	1142314	158	1.64258	6.92741	2.16453e-19	Uninfected_unique	215.076	68.8851
chr19	1223187	1223373	93	0.79919	7.57614	9.48889e-09	Uninfected_unique	251.73	144.662
chr19	1668435	1668624	95	0.19417	9.89427	0.000124594	Uninfected_unique	1017.88	889.706
chr19	1768815	1769041	113	0.98642	7.15968	1.69703e-09	Uninfected_unique	201.256	101.58
chr19	1940301	1940536	118	0.20049	9.11754	0.000833544	Uninfected_unique	595.429	518.175
chr19	1942315	1942544	115	0.50681	8.77511	2.07539e-08	Uninfected_unique	522.22	367.527
chr19	2083230	2083438	104	0.20675	8.49735	0.00229251	Uninfected_unique	388.218	336.386
chr19	2128433	2128917	242	2.3518	7.18097	1.57454e-44	Uninfected_unique	327.845	64.2253
chr19	2375466	2375714	124	1.1225	6.63378	6.50492e-09	Uninfected_unique	146.528	67.2998
chr19	2624561	2624770	105	0.40635	8.59208	6.86366e-06	Uninfected_unique	444.258	335.206
chr19	2713686	2714015	165	1.78807	7.41038	1.35695e-30	Uninfected_unique	316.139	91.5409
chr19	2910760	2910951	96	1.34952	5.78041	1.69583e-07	Uninfected_unique	87.7404	34.4313
chr19	3359559	3359735	88	0.83348	7.77259	2.40486e-10	Uninfected_unique	291.9	163.807
chr19	4084035	4084300	133	0.99824	6.86359	1.79563e-08	Uninfected_unique	164.587	82.3941
chr19	4807404	4807634	115	0.76569	6.93366	5.57764e-06	Uninfected_unique	159.4	93.7544
chr19	4916731	4916920	95	1.00463	6.46625	6.16886e-07	Uninfected_unique	125.241	62.4199
chr19	7515516	7516019	252	1.26504	7.0834	1.00798e-13	Uninfected_unique	210.244	87.4799
chr19	7655125	7655353	114	0.88495	6.6677	2.23143e-06	Uninfected_unique	138.158	74.8134
chr19	7990451	7990679	114	0.21123	8.79433	0.00124856	Uninfected_unique	477.695	412.633
chr19	8201220	8201434	107	1.11263	6.72118	5.10731e-09	Uninfected_unique	155.147	71.7479
chr19	9422843	9423018	88	0.52696	6.33919	0.00200349	Uninfected_unique	97.1856	67.4483
chr19	10384410	10384595	93	1.7701	6.65036	6.50349e-19	Uninfected_unique	185.517	54.3915
chr19	10561599	10561898	150	1.06912	7.11929	1.43021e-10	Uninfected_unique	201.39	95.9845
chr19	10655053	10655247	97	0.35983	8.71138	1.99618e-05	Uninfected_unique	474.839	370.021
chr19	10947215	10947392	89	0.09487	9.90649	0.00324036	Uninfected_unique	991.813	928.691
chr19	11320175	11320351	88	2.31088	6.68359	4.48222e-31	Uninfected_unique	228.972	46.1465
chr19	11529193	11529387	97	1.35006	7.22779	1.60227e-16	Uninfected_unique	239.324	93.8809
chr19	11662838	11663024	93	0.47	7.67314	8.46766e-05	Uninfected_unique	240.208	173.422
chr19	12903362	12903604	121	0.17747	9.36073	0.000910742	Uninfected_unique	699.153	618.228
chr19	12991318	12991510	96	-0.08246	8.83128	0.00911995	Uninfected_unique	442.658	468.696
chr19	13388873	13389048	88	-0.02096	7.94094	0.0176872	Uninfected_unique	243.953	247.523
chr19	13512296	13512510	107	1.00586	6.13189	6.31013e-06	Uninfected_unique	99.3756	49.4864
chr19	13814315	13814566	126	1.39291	6.89802	3.18413e-14	Uninfected_unique	193.27	73.5965
chr19	13906610	13906868	129	0.06249	9.51541	0.00734975	Uninfected_unique	747.876	716.173
chr19	14094039	14094423	192	1.46137	7.79631	3.22953e-27	Uninfected_unique	368.877	133.957
chr19	14183348	14183591	122	0.09894	9.11375	0.00624806	Uninfected_unique	573.329	535.328
chr19	15295310	15295556	123	1.09079	7.08795	7.06015e-11	Uninfected_unique	198.548	93.2192
chr19	15888942	15889118	88	1.53769	7.31684	5.7239e-22	Uninfected_unique	271.665	93.5713
chr19	16044666	16044892	113	1.17107	6.87639	1.01275e-10	Uninfected_unique	176.304	78.2954
chr19	16555079	16555259	90	0.31699	8.42648	0.000232907	Uninfected_unique	384.003	308.256
chr19	16561091	16561280	95	0.0537	8.16346	0.0149922	Uninfected_unique	292.098	281.426
chr19	16999552	16999834	141	0.94514	7.47473	9.84154e-11	Uninfected_unique	246.817	128.192
chr19	17295354	17295537	92	0.70164	7.36522	1.27243e-06	Uninfected_unique	210.261	129.284
chr19	17830810	17831043	117	0.14229	8.51696	0.00609359	Uninfected_unique	384.837	348.693
chr19	18058323	18058517	97	0.08496	9.44425	0.00584743	Uninfected_unique	717.448	676.417
chr19	18313829	18314042	107	0.10903	9.3434	0.00439699	Uninfected_unique	674.612	625.508
chr19	18631790	18631990	100	0.24063	9.10232	0.000281108	Uninfected_unique	597.434	505.653
chr19	18776458	18776693	118	0.64605	7.0734	3.43124e-05	Uninfected_unique	168.479	107.663
chr19	19772788	19773011	112	0.45972	7.71201	9.74394e-05	Uninfected_unique	245.89	178.793
chr19	19880670	19880845	88	1.13612	6.21011	3.33914e-07	Uninfected_unique	109.757	49.9374
chr19	20260423	20260692	135	1.49455	7.0299	1.91249e-17	Uninfected_unique	219.363	77.85
chr19	20585720	20586084	182	1.45468	7.05097	4.59597e-17	Uninfected_unique	219.535	80.0944
chr19	20586220	20586908	344	1.52961	7.09634	5.51077e-19	Uninfected_unique	232.509	80.5345
chr19	20712713	20713017	152	1.26894	6.60454	2.39573e-10	Uninfected_unique	151.063	62.6859
chr19	20713333	20713547	107	1.39459	6.47215	3.48227e-11	Uninfected_unique	143.952	54.7526
chr19	21903968	21904165	99	1.60471	6.82642	1.42188e-17	Uninfected_unique	197.92	65.0765
chr19	22048247	22048754	254	1.66305	6.85411	5.15121e-19	Uninfected_unique	205.876	65.0098
chr19	22289902	22290096	97	1.68676	6.80283	7.12015e-19	Uninfected_unique	200.327	62.2262
chr19	22290146	22290517	186	1.79214	6.76019	1.37336e-20	Uninfected_unique	201.727	58.2473
chr19	23110453	23110767	157	1.82131	6.81451	8.21459e-22	Uninfected_unique	211.595	59.8739
chr19	23254113	23254288	88	0.92992	6.63447	9.97655e-07	Uninfected_unique	137.133	71.9793
chr19	30391312	30391531	110	2.11106	7.17256	3.63545e-36	Uninfected_unique	299.849	69.408
chr19	30457188	30457388	100	0.1352	6.33311	0.026985	Uninfected_unique	84.4901	76.9319
chr19	31118752	31118953	101	0.85865	6.63365	4.44532e-06	Uninfected_unique	133.711	73.7374
chr19	33211729	33211928	100	1.39927	6.21585	9.02296e-10	Uninfected_unique	120.717	45.7663
chr19	34286576	34286838	131	0.55651	7.69629	8.06489e-06	Uninfected_unique	251.523	171.022
chr19	34405164	34405358	97	1.43589	5.93653	7.65131e-09	Uninfected_unique	100.739	37.2349
chr19	34570329	34570562	117	1.43692	6.70962	2.10185e-13	Uninfected_unique	172.217	63.609
chr19	34570803	34570978	88	1.41022	6.69695	6.47843e-13	Uninfected_unique	169.138	63.639
chr19	34882836	34883022	93	1.00033	7.34719	7.44381e-11	Uninfected_unique	230.298	115.122
chr19	35576617	35576821	102	0.17123	8.20843	0.00583606	Uninfected_unique	313.875	278.747
chr19	35615441	35615639	99	1.38365	6.80453	1.43582e-13	Uninfected_unique	180.563	69.2002
chr19	35815080	35815269	95	0.01412	8.66077	0.0138755	Uninfected_unique	406.702	402.741
chr19	35815413	35815588	88	0.00132	8.29599	0.0159132	Uninfected_unique	314.442	314.154
chr19	35862102	35862366	132	0.94214	6.56004	1.16798e-06	Uninfected_unique	130.79	68.0711
chr19	35911399	35911574	88	0.691	6.31741	0.000376112	Uninfected_unique	101.329	62.7659
chr19	37701374	37701636	131	0.65263	6.31206	0.00046326	Uninfected_unique	99.6208	63.3707
chr19	39226722	39226938	108	0.65957	7.89442	6.87154e-08	Uninfected_unique	299.042	189.314
chr19	39440413	39440597	92	1.15205	6.63584	4.72486e-09	Uninfected_unique	148.248	66.7092
chr19	40614114	40614637	262	1.60121	7.10066	1.28007e-20	Uninfected_unique	239.066	78.7963
chr19	40623850	40624667	409	1.71395	6.94973	2.32004e-21	Uninfected_unique	223.899	68.2499
chr19	41153798	41154007	105	1.29415	6.69121	2.55082e-11	Uninfected_unique	161.824	65.9882
chr19	41381395	41381629	117	1.35516	6.28106	1.6833e-09	Uninfected_unique	124.383	48.6201
chr19	41470993	41471358	183	1.5659	6.98011	1.55969e-18	Uninfected_unique	217.227	73.3721
chr19	41609162	41609425	132	1.38929	6.04091	8.73058e-09	Uninfected_unique	106.562	40.6805
chr19	41686473	41686924	226	1.83578	6.87355	4.87295e-23	Uninfected_unique	221.543	62.0629
chr19	41803908	41804163	128	0.0979	8.27549	0.0112254	Uninfected_unique	320.558	299.527
chr19	42022897	42023123	113	1.04911	6.86831	4.88077e-09	Uninfected_unique	168.064	81.2195
chr19	42680918	42681093	88	0.02917	8.55846	0.0139211	Uninfected_unique	380.841	373.218
chr19	43071127	43071334	104	0.70597	6.51701	0.000133554	Uninfected_unique	116.97	71.7061
chr19	43114405	43114618	107	1.35829	6.45492	1.5099e-10	Uninfected_unique	140.465	54.7875
chr19	44143895	44144070	88	1.07552	6.73657	7.97579e-09	Uninfected_unique	154.807	73.4561
chr19	44259694	44259931	119	0.03634	9.29843	0.010152	Uninfected_unique	637.641	621.78
chr19	44913928	44914167	120	1.59475	6.98298	4.62136e-19	Uninfected_unique	219.847	72.7868
chr19	44920060	44920334	137	1.02871	7.08361	7.61472e-10	Uninfected_unique	193.738	94.9605
chr19	44960537	44960712	88	1.23607	6.49629	1.8494e-09	Uninfected_unique	138.556	58.8208
chr19	45414501	45414696	98	1.06092	6.71873	1.99223e-08	Uninfected_unique	152.133	72.9214
chr19	45606930	45607108	89	0.72476	7.20962	2.11731e-06	Uninfected_unique	190.283	115.14
chr19	46018457	46018706	125	0.47079	7.39873	0.000218436	Uninfected_unique	198.656	143.344
chr19	46853960	46854145	93	0.10007	8.3064	0.0108181	Uninfected_unique	327.746	305.783
chr19	46910287	46910466	90	0.3974	7.15282	0.00166439	Uninfected_unique	163.316	123.993
chr19	47950759	47950956	99	1.34466	6.87512	2.84404e-13	Uninfected_unique	187.072	73.659
chr19	48252597	48252782	93	0.82257	6.7608	5.00158e-06	Uninfected_unique	144.216	81.5445
chr19	48273350	48273528	89	0.94719	6.27447	9.82929e-06	Uninfected_unique	107.49	55.749
chr19	48415666	48415900	117	0.86827	7.318	1.05059e-08	Uninfected_unique	215.588	118.1
chr19	49172517	49173178	331	1.68075	7.28966	1.5865e-25	Uninfected_unique	280.146	87.3833
chr19	49436701	49437021	160	1.12933	6.72911	2.72194e-09	Uninfected_unique	156.908	71.727
chr19	49718016	49718256	120	0.70572	6.53916	0.000113476	Uninfected_unique	118.769	72.8219
chr19	50003529	50003835	153	0.44078	8.89788	1.70657e-07	Uninfected_unique	555.741	409.435
chr19	50312316	50312615	150	0.43644	8.15801	2.72701e-05	Uninfected_unique	332.274	245.536
chr19	50595141	50595499	179	0.65042	7.81963	1.82553e-07	Uninfected_unique	283.036	180.321
chr19	50602228	50602417	95	0.93447	8.30517	7.35222e-17	Uninfected_unique	437.277	228.799
chr19	50637414	50637773	180	0.60361	8.82707	2.74098e-11	Uninfected_unique	559.842	368.435
chr19	50921453	50921644	96	0.39424	9.29689	9.52859e-08	Uninfected_unique	721.077	548.661
chr19	51814112	51814475	182	1.47466	6.88181	1.13612e-15	Uninfected_unique	196.603	70.7413
chr19	53096931	53097119	94	1.40309	6.18162	1.52964e-09	Uninfected_unique	118.043	44.6341
chr19	53315018	53315400	191	1.7658	6.37189	1.02759e-15	Uninfected_unique	152.725	44.9108
chr19	53689936	53690190	127	1.48009	6.89557	5.23554e-16	Uninfected_unique	198.861	71.2849
chr19	53790690	53790865	88	0.96102	5.54712	0.000302349	Uninfected_unique	65.2375	33.5121
chr19	53863867	53864056	95	0.2735	5.91034	0.0220275	Uninfected_unique	66.1235	54.7046
chr19	54024028	54024368	170	1.40173	6.54725	1.0432e-11	Uninfected_unique	152.02	57.5357
chr19	54345430	54345619	95	0.5075	6.38873	0.00216892	Uninfected_unique	99.9047	70.277
chr19	54373463	54373731	134	1.84886	6.82758	1.377e-22	Uninfected_unique	215.57	59.8446
chr19	54493748	54494095	174	1.34547	7.0187	1.07672e-14	Uninfected_unique	206.706	81.344
chr19	54637166	54637351	93	1.84671	7.2854	2.90459e-30	Uninfected_unique	295.857	82.2558
chr19	54637379	54637555	88	1.89414	7.26934	3.43689e-31	Uninfected_unique	297.431	80.019
chr19	54983271	54983541	135	1.80667	7.08355	2.469e-25	Uninfected_unique	253.683	72.5154
chr19	55719294	55719604	155	2.18641	6.74077	4.93363e-29	Uninfected_unique	228.172	50.1287
chr19	55767050	55767244	97	0.13651	7.93958	0.0105096	Uninfected_unique	257.394	234.156
chr19	56061193	56061550	179	0.87782	6.51766	7.57027e-06	Uninfected_unique	124.204	67.5906
chr19	56091601	56091778	89	0.49943	8.09541	4.85826e-06	Uninfected_unique	325.187	230.033
chr19	56404602	56404781	90	0.27502	6.26685	0.0155371	Uninfected_unique	84.7041	70.0028
chr19	57454210	57454425	108	2.0466	5.84707	7.45384e-15	Uninfected_unique	117	28.3204
chr19	58514114	58514310	98	0.80916	6.3474	5.81645e-05	Uninfected_unique	107.783	61.513
chr19	58658734	58659004	135	1.48111	6.39004	7.53314e-12	Uninfected_unique	140.127	50.1955
chr19	59074272	59074604	166	0.82758	8.10136	2.45663e-12	Uninfected_unique	365.861	206.153
chr19	59097883	59098118	118	1.2063	6.54897	3.04018e-09	Uninfected_unique	142.234	61.6411
chr18	10915	11110	98	1.78291	10.0193	2.79993e-175	Uninfected_unique	1925.1	559.427
chr18	12333	12540	104	1.48383	7.79546	5.39246e-28	Uninfected_unique	371.54	132.84
chr18	28252	28711	230	0.92679	6.62181	9.0549e-07	Uninfected_unique	135.787	71.4279
chr18	1929817	1930054	119	0.25643	6.50187	0.0146597	Uninfected_unique	99.05	82.9204
chr18	2883492	2883680	94	0.24832	6.69656	0.0127149	Uninfected_unique	113.042	95.1677
chr18	3741006	3741190	92	0.86446	6.30618	2.82952e-05	Uninfected_unique	106.774	58.6456
chr18	8610122	8610334	106	-0.08337	8.39695	0.0114214	Uninfected_unique	327.48	346.962
chr18	10850331	10850523	96	0.339	6.16321	0.0122652	Uninfected_unique	80.6001	63.7216
chr18	10898721	10898901	90	0.43565	6.31967	0.00531316	Uninfected_unique	92.8928	68.6813
chr18	11521513	11521691	89	0.47322	6.26478	0.00366746	Uninfected_unique	90.5969	65.2619
chr18	12657539	12658275	368	1.0399	7.2821	4.91599e-11	Uninfected_unique	223.178	108.545
chr18	12979678	12980007	165	1.68238	6.87546	1.99315e-19	Uninfected_unique	210.35	65.5385
chr18	12980159	12980522	182	1.83591	6.99595	1.3779e-24	Uninfected_unique	241.17	67.5552
chr18	13262224	13262421	99	0.77827	7.08391	1.33173e-06	Uninfected_unique	177.669	103.592
chr18	13482195	13482523	164	0.64337	7.03502	3.65878e-05	Uninfected_unique	163.904	104.934
chr18	13587136	13587311	88	0.45113	6.52454	0.00308419	Uninfected_unique	107.643	78.7373
chr18	14223872	14224111	120	1.32308	6.92809	1.76517e-13	Uninfected_unique	192.622	76.9874
chr18	14251584	14251823	120	0.81837	7.19131	1.86227e-07	Uninfected_unique	194.078	110.058
chr18	14474656	14474869	107	0.53754	7.02921	0.000261583	Uninfected_unique	157.366	108.416
chr18	14702568	14702776	104	0.4627	6.28445	0.00374568	Uninfected_unique	91.5063	66.3995
chr18	14866532	14866707	88	0.91642	7.055	3.70551e-08	Uninfected_unique	182.684	96.7903
chr18	15223093	15223282	95	0.73257	6.0022	0.000569103	Uninfected_unique	82.6238	49.7255
chr18	19172345	19172566	111	1.22841	6.66001	2.87257e-10	Uninfected_unique	154.795	66.0646
chr18	19172698	19172898	100	1.1348	6.74279	1.43914e-09	Uninfected_unique	158.703	72.2733
chr18	19812608	19812806	99	0.94426	7.01841	1.90053e-08	Uninfected_unique	179.836	93.4602
chr18	20798397	20798646	125	1.21369	6.51279	3.06692e-09	Uninfected_unique	139.067	59.9607
chr18	20819427	20819603	88	0.14798	8.27897	0.00702696	Uninfected_unique	326.958	295.084
chr18	21199174	21199349	88	0.97278	6.6769	2.76125e-07	Uninfected_unique	143.339	73.0347
chr18	21269714	21269910	98	1.22896	6.39354	7.19467e-09	Uninfected_unique	128.714	54.9124
chr18	21547537	21547730	97	0.17927	7.10519	0.0133626	Uninfected_unique	146.507	129.388
chr18	21977750	21977927	89	0.89986	6.36385	1.08514e-05	Uninfected_unique	112.5	60.2931
chr18	27970942	27971178	118	0.16685	6.56222	0.0210737	Uninfected_unique	100.124	89.1891
chr18	29119623	29119898	138	0.62476	6.56545	0.00029967	Uninfected_unique	117.607	76.2714
chr18	30643085	30643260	88	0.20331	6.95532	0.0141631	Uninfected_unique	133.156	115.653
chr18	31739314	31739539	113	0.05297	6.91109	0.0243791	Uninfected_unique	122.58	118.161
chr18	32721619	32721810	96	0.05971	9.20147	0.00910229	Uninfected_unique	601.043	576.675
chr18	33301429	33301604	88	0.64076	6.8659	7.05787e-05	Uninfected_unique	145.642	93.411
chr18	33484520	33484695	88	0.53024	6.91977	0.000418018	Uninfected_unique	145.501	100.751
chr18	33611771	33611960	95	0.576	7.23122	6.23575e-05	Uninfected_unique	183.447	123.06
chr18	33665374	33665593	110	0.89051	6.70206	1.10711e-06	Uninfected_unique	141.761	76.4691
chr18	34308700	34308875	88	0.40234	8.28795	3.90693e-05	Uninfected_unique	359.319	271.871
chr18	34317928	34318113	93	0.29181	7.25267	0.00476775	Uninfected_unique	168.73	137.832
chr18	35114343	35114596	127	0.86532	8.31129	5.24299e-15	Uninfected_unique	428.737	235.344
chr18	38556101	38556355	127	0.40357	6.77861	0.00305603	Uninfected_unique	126.272	95.46
chr18	41169505	41169715	105	-0.11831	7.43338	0.0161574	Uninfected_unique	165.906	180.085
chr18	41880218	41880393	88	0.35031	6.56571	0.00724612	Uninfected_unique	106.955	83.8975
chr18	42125484	42125708	112	0.56156	6.37942	0.00150321	Uninfected_unique	101.139	68.5289
chr18	42338332	42338526	97	-0.22551	9.12786	0.000377463	Uninfected_unique	517.389	604.926
chr18	43405647	43405884	119	0.57062	7.60012	1.07242e-05	Uninfected_unique	236.456	159.213
chr18	44336722	44336914	96	0.96442	7.23906	1.04671e-09	Uninfected_unique	211.025	108.147
chr18	44555890	44556125	118	1.26797	9.56947	2.39816e-66	Uninfected_unique	1179.09	489.609
chr18	45170346	45170662	158	0.63377	6.32846	0.000753354	Uninfected_unique	100.103	64.5156
chr18	45354306	45354652	173	1.8837	6.21375	6.86584e-16	Uninfected_unique	142.577	38.6367
chr18	45458181	45458373	96	0.05691	10.6644	0.00372614	Uninfected_unique	1655.22	1591.2
chr18	45936654	45936914	130	1.18011	6.96905	1.60961e-11	Uninfected_unique	188.589	83.2279
chr18	46454089	46454297	104	0.85729	8.06675	8.36011e-13	Uninfected_unique	360.885	199.204
chr18	46463957	46464187	115	0.78057	7.70944	5.22502e-09	Uninfected_unique	274.322	159.693
chr18	46551167	46551383	108	0.36492	8.92	5.46789e-06	Uninfected_unique	549.684	426.837
chr18	46582300	46582496	98	0.78816	7.00225	2.27e-06	Uninfected_unique	168.468	97.5568
chr18	46886138	46886323	93	0.30693	6.56414	0.0101245	Uninfected_unique	105.245	85.0757
chr18	47326301	47326502	101	1.17632	6.77349	4.59088e-10	Uninfected_unique	164.467	72.7729
chr18	48677911	48678158	124	0.24119	9.52584	6.21651e-05	Uninfected_unique	801.431	678.049
chr18	51497917	51498104	94	-0.1041	6.88275	0.0226644	Uninfected_unique	113.827	122.344
chr18	51767900	51768168	134	0.57787	7.57907	9.97116e-06	Uninfected_unique	233.618	156.513
chr18	51869697	51870025	164	1.48448	7.03523	1.91249e-17	Uninfected_unique	219.408	78.4113
chr18	51870121	51870337	108	1.55752	6.90987	1.71162e-17	Uninfected_unique	206.304	70.0887
chr18	52577887	52578070	92	0.4235	7.20272	0.000896012	Uninfected_unique	170.6	127.201
chr18	53122229	53122418	95	0.06094	7.33868	0.0205651	Uninfected_unique	165.324	158.486
chr18	53255612	53255908	148	-0.26986	8.93188	0.000186715	Uninfected_unique	444.781	536.268
chr18	54230958	54231133	88	0.62237	7.06216	5.07336e-05	Uninfected_unique	165.805	107.708
chr18	55020568	55020919	176	1.23527	7.05113	6.63901e-13	Uninfected_unique	203.483	86.4321
chr18	55247947	55248122	88	0.24626	7.23673	0.00750744	Uninfected_unique	164.263	138.486
chr18	55470262	55470556	147	1.09973	7.34607	1.23142e-12	Uninfected_unique	238.184	111.138
chr18	57906598	57906773	88	0.56	5.86989	0.00397229	Uninfected_unique	71.007	48.1642
chr18	74113666	74113869	102	1.24664	5.70734	2.89801e-06	Uninfected_unique	80.4857	33.919
chr18	74740349	74740578	115	1.70712	5.92587	2.6539e-11	Uninfected_unique	109.853	33.6448
chr18	74766697	74766908	106	-0.17902	7.94094	0.00721186	Uninfected_unique	230.949	261.461
chr18	74832183	74832366	92	0.39641	6.12493	0.00937211	Uninfected_unique	80.067	60.8306
chr18	74863732	74864276	272	1.35655	6.48323	8.95442e-11	Uninfected_unique	143.162	55.9069
chr18	74964772	74965049	139	2.05623	5.72984	8.56501e-14	Uninfected_unique	108.23	26.0232
chr18	74970535	74970859	162	1.65237	5.40448	4.78285e-08	Uninfected_unique	75.096	23.8893
chr18	76724909	76725105	98	1.50931	5.43807	4.08382e-07	Uninfected_unique	73.1469	25.695
chr18	76776526	76776819	147	1.11049	7.45916	1.02357e-13	Uninfected_unique	258.569	119.753
chr18	76776888	76777115	114	1.2416	7.22553	1.94326e-14	Uninfected_unique	230.134	97.3244
chr18	77264809	77265098	145	0.50201	7.02684	0.000534336	Uninfected_unique	155.185	109.58
chr18	77282964	77283201	119	0.27468	8.36692	0.000776351	Uninfected_unique	363.109	300.158
chr18	77292158	77292413	128	2.18373	5.65665	1.24952e-14	Uninfected_unique	107.524	23.6667
chr18	77383504	77383756	126	0.44993	6.24121	0.00574318	Uninfected_unique	88.4123	64.7247
chr18	77393633	77394046	207	2.06813	5.67027	2.28775e-13	Uninfected_unique	104.281	24.8678
chr18	77681603	77681783	90	1.17713	5.34413	5.42183e-05	Uninfected_unique	61.0828	27.0127
chr18	77709939	77710114	88	0.24681	6.80868	0.0119418	Uninfected_unique	122.114	102.913
chr18	77831576	77831897	161	1.54149	6.17225	3.3979e-11	Uninfected_unique	123.041	42.2683
chr22	16122753	16122962	105	0.90233	6.75896	6.54925e-07	Uninfected_unique	148.069	79.2201
chr22	16123096	16123368	136	1.00017	6.96667	6.25548e-09	Uninfected_unique	176.896	88.4374
chr22	16123454	16123740	143	1.0516	7.02642	8.46026e-10	Uninfected_unique	187.692	90.5486
chr22	16166522	16166713	96	0.28854	6.78126	0.00901951	Uninfected_unique	121.56	99.5252
chr22	16212755	16213014	130	0.53936	6.98566	0.000283001	Uninfected_unique	152.783	105.126
chr22	16216671	16216849	89	0.91425	7.43562	5.43999e-10	Uninfected_unique	237.658	126.106
chr22	16228128	16228443	158	0.60081	7.03721	8.62338e-05	Uninfected_unique	161.749	106.655
chr22	16264113	16264303	95	0.23685	6.87186	0.0120891	Uninfected_unique	127.141	107.891
chr22	16955677	16955919	121	0.5453	6.75973	0.00059498	Uninfected_unique	130.905	89.7027
chr22	17001084	17001480	198	0.85612	7.62439	7.40018e-10	Uninfected_unique	265.478	146.66
chr22	17026428	17026736	154	0.95788	6.73403	2.15366e-07	Uninfected_unique	148.361	76.3782
chr22	17039388	17039563	88	0.9665	6.81929	8.92908e-08	Uninfected_unique	157.864	80.7864
chr22	17042094	17042277	92	1.30973	6.97229	1.55858e-13	Uninfected_unique	197.698	79.7507
chr22	17045243	17045445	101	0.68168	7.29405	3.48062e-06	Uninfected_unique	198.761	123.915
chr22	17046296	17046569	137	0.89122	7.55408	3.39004e-10	Uninfected_unique	255.945	137.995
chr22	17046704	17046905	101	0.94187	7.64386	1.0699e-11	Uninfected_unique	277.202	144.3
chr22	17047804	17048028	112	1.20192	7.81458	1.96398e-19	Uninfected_unique	341.452	148.428
chr22	17048086	17048305	110	1.24502	7.83503	4.77464e-21	Uninfected_unique	351.539	148.315
chr22	18463413	18463748	168	0.71799	7.2132	2.79266e-06	Uninfected_unique	190.308	115.697
chr22	18686023	18686305	141	1.60532	5.72238	2.81465e-09	Uninfected_unique	92.0943	30.268
chr22	18778566	18778762	98	0.60558	7.33761	1.59917e-05	Uninfected_unique	199.521	131.127
chr22	18860449	18860698	125	1.00992	6.59221	2.12614e-07	Uninfected_unique	136.918	67.99
chr22	19171337	19171531	97	0.56062	7.63369	1.27801e-05	Uninfected_unique	241.186	163.526
chr22	19189847	19190053	103	1.00179	6.67967	1.04744e-07	Uninfected_unique	145.066	72.443
chr22	19418653	19418900	124	0.00684	9.28327	0.0112544	Uninfected_unique	624.557	621.603
chr22	19537475	19537650	88	1.03874	6.34674	8.33922e-07	Uninfected_unique	116.655	56.7823
chr22	19860460	19860709	125	1.30488	7.35646	4.72947e-17	Uninfected_unique	257.584	104.258
chr22	20232182	20232386	102	1.38239	7.49419	2.90527e-20	Uninfected_unique	291.103	111.662
chr22	20326507	20326683	88	0.95241	7.53747	4.58454e-11	Uninfected_unique	258.438	133.553
chr22	20610658	20610872	107	0.52874	6.99558	0.000345742	Uninfected_unique	153.272	106.242
chr22	20656286	20656484	99	1.72656	6.07448	9.64819e-13	Uninfected_unique	122.595	37.0448
chr22	20656823	20657018	98	1.63958	6.51274	6.25505e-15	Uninfected_unique	161.18	51.7307
chr22	21158320	21158495	88	0.19407	6.54784	0.0185803	Uninfected_unique	100.071	87.4754
chr22	21375175	21375356	91	0.60654	6.87493	0.00013847	Uninfected_unique	144.828	95.1189
chr22	21399974	21400289	158	1.17861	6.98723	1.35772e-11	Uninfected_unique	190.882	84.3271
chr22	21496619	21496798	90	0.72221	6.5359	8.6289e-05	Uninfected_unique	119.181	72.2435
chr22	21538140	21538342	101	1.683	6.41985	9.90174e-15	Uninfected_unique	153.421	47.7805
chr22	21663335	21663522	94	1.27322	6.60657	1.69435e-10	Uninfected_unique	151.501	62.6812
chr22	21678764	21678947	92	0.98629	7.04678	5.17741e-09	Uninfected_unique	186.099	93.9379
chr22	22237789	22238041	126	1.05402	6.74793	1.89227e-08	Uninfected_unique	154.873	74.5905
chr22	22457476	22457658	91	0.29138	6.56617	0.0112429	Uninfected_unique	104.827	85.6559
chr22	22478058	22478274	108	2.00973	6.20886	1.19462e-17	Uninfected_unique	148.439	36.8603
chr22	22609954	22610225	136	0.30657	6.58273	0.00918304	Uninfected_unique	106.596	86.1898
chr22	22643471	22643662	96	0.71103	7.42871	7.51024e-07	Uninfected_unique	220.437	134.662
chr22	22644504	22644722	109	0.77892	7.359	1.30379e-07	Uninfected_unique	215.04	125.326
chr22	23040831	23041017	93	-0.11474	9.24644	0.0044376	Uninfected_unique	583.695	632.013
chr22	23243125	23243362	119	0.40236	9.15279	1.91284e-07	Uninfected_unique	654.373	495.112
chr22	23243382	23243591	105	0.31919	9.36323	3.50255e-06	Uninfected_unique	735.624	589.617
chr22	23248252	23248465	107	0.23761	9.67096	4.06847e-05	Uninfected_unique	885.142	750.732
chr22	23450222	23450443	111	0.5803	7.31365	3.24668e-05	Uninfected_unique	194.523	130.102
chr22	23520724	23520899	88	0.2932	7.59367	0.0025792	Uninfected_unique	213.823	174.498
chr22	23542307	23542603	148	0.33369	7.6522	0.00129655	Uninfected_unique	225.822	179.191
chr22	23790646	23791266	310	1.17392	7.2409	3.90562e-13	Uninfected_unique	227.206	100.701
chr22	23827806	23827992	93	0.43867	6.00369	0.00754174	Uninfected_unique	74.6994	55.1143
chr22	24148884	24149110	113	0.14658	8.18584	0.00803627	Uninfected_unique	306.37	276.771
chr22	24552625	24552840	108	0.20752	9.91015	6.05996e-05	Uninfected_unique	1033.92	895.401
chr22	24712934	24713310	188	1.48577	6.81803	1.99343e-15	Uninfected_unique	188.826	67.4219
chr22	24713405	24713650	123	1.49778	6.94779	8.33088e-17	Uninfected_unique	207.459	73.4607
chr22	25574507	25574735	114	0.67633	7.07305	1.78644e-05	Uninfected_unique	170.215	106.513
chr22	27168718	27169060	171	1.5486	6.58871	1.94188e-14	Uninfected_unique	164.622	56.2745
chr22	27169134	27169360	113	1.37988	6.66993	2.29816e-12	Uninfected_unique	164.264	63.1185
chr22	29516036	29516396	180	2.20315	6.13661	6.06576e-20	Uninfected_unique	150.977	32.7866
chr22	30253719	30253899	90	1.76886	6.39124	4.28341e-16	Uninfected_unique	154.951	45.469
chr22	30254011	30254269	129	1.70333	6.46289	1.63496e-15	Uninfected_unique	159.184	48.8818
chr22	30662655	30662893	119	0.12464	9.29404	0.00352723	Uninfected_unique	655.458	601.208
chr22	31423185	31423480	148	1.49054	6.72244	1.65759e-14	Uninfected_unique	177.013	62.9952
chr22	31742608	31742900	146	0.30152	9.71741	9.18833e-07	Uninfected_unique	934.577	758.313
chr22	31988688	31988944	128	1.81354	7.17111	5.24246e-27	Uninfected_unique	270.199	76.8695
chr22	32323067	32323269	101	0.81511	6.35022	5.81645e-05	Uninfected_unique	108.216	61.5064
chr22	33327837	33328123	143	1.00888	5.93864	1.86551e-05	Uninfected_unique	87.0082	43.2372
chr22	33453534	33453725	96	-0.00407	8.19398	0.0164731	Uninfected_unique	292.429	293.256
chr22	34315888	34316080	96	0.08053	8.90706	0.00880766	Uninfected_unique	493.643	466.843
chr22	35021796	35022065	135	1.79127	6.16989	3.79362e-14	Uninfected_unique	133.948	38.6998
chr22	35859564	35859780	108	0.79604	7.11497	5.52473e-07	Uninfected_unique	182.657	105.197
chr22	36257598	36257808	105	0.07757	7.16794	0.0210253	Uninfected_unique	147.72	139.988
chr22	37297925	37298184	130	0.39144	6.3221	0.00705891	Uninfected_unique	91.6346	69.8593
chr22	37631511	37631721	105	1.19662	7.00512	8.23472e-12	Uninfected_unique	194.474	84.8481
chr22	37662803	37663071	134	0.41952	7.28457	0.00090187	Uninfected_unique	180.309	134.812
chr22	37881233	37881445	106	0.27737	9.69459	4.89756e-06	Uninfected_unique	912.243	752.686
chr22	38127915	38128091	88	0.81902	6.312	5.04598e-05	Uninfected_unique	105.53	59.8173
chr22	38173334	38173576	121	1.17197	7.07479	6.76938e-12	Uninfected_unique	202.359	89.8101
chr22	38558887	38559118	116	0.27077	7.45296	0.00497227	Uninfected_unique	192.451	159.518
chr22	38585049	38585230	91	1.02592	6.42368	4.88691e-07	Uninfected_unique	122.5	60.1595
chr22	38850462	38850672	105	0.69954	7.60176	1.82064e-07	Uninfected_unique	247.542	152.429
chr22	39157312	39157507	98	0.70206	7.04774	1.00454e-05	Uninfected_unique	168.753	103.731
chr22	39202601	39202778	89	1.59482	6.85793	1.11369e-17	Uninfected_unique	201.598	66.7419
chr22	39202963	39203211	124	1.58397	6.93369	3.00574e-18	Uninfected_unique	211.67	70.6053
chr22	39203265	39203630	183	1.53207	6.94232	1.96553e-17	Uninfected_unique	209.144	72.3181
chr22	39540469	39540667	99	0.21368	7.90939	0.00474204	Uninfected_unique	258.896	223.255
chr22	39784711	39784996	143	0.71716	7.36653	8.24497e-07	Uninfected_unique	211.587	128.707
chr22	39814679	39814916	119	0.69813	6.89312	2.49304e-05	Uninfected_unique	151.396	93.3162
chr22	39922875	39923095	110	0.48941	8.49363	4.56496e-07	Uninfected_unique	427.072	304.21
chr22	40058695	40058912	109	1.23529	7.13952	1.73973e-13	Uninfected_unique	216.341	91.8925
chr22	40897425	40897601	88	1.45499	7.01113	1.318e-16	Uninfected_unique	213.579	77.9045
chr22	40897641	40897872	116	1.3418	7.07402	5.74829e-15	Uninfected_unique	214.513	84.6313
chr22	40933155	40933581	213	2.0284	7.01522	4.29014e-30	Uninfected_unique	261.274	64.0453
chr22	40933769	40933960	96	1.99904	6.81667	6.77362e-26	Uninfected_unique	225.376	56.3815
chr22	41140997	41141504	254	1.4118	6.98045	1.48839e-15	Uninfected_unique	205.979	77.4155
chr22	41214534	41214726	96	-0.03238	8.66972	0.0132936	Uninfected_unique	402.691	411.831
chr22	41751959	41752184	113	0.92814	6.86836	1.75309e-07	Uninfected_unique	161.169	84.7
chr22	41843520	41843717	99	0.06456	9.80942	0.00589599	Uninfected_unique	917.586	877.43
chr22	41843856	41844047	96	0.08532	9.76209	0.00452824	Uninfected_unique	894.384	843.024
chr22	42310858	42311048	95	0.86387	7.76812	7.46289e-11	Uninfected_unique	294.078	161.589
chr22	43044544	43044739	98	0.04867	8.8107	0.0117387	Uninfected_unique	456.678	441.529
chr22	43169382	43169568	93	0.72824	6.83762	1.99654e-05	Uninfected_unique	147.211	88.8623
chr22	43377649	43378259	305	1.75422	6.99185	6.66713e-23	Uninfected_unique	233.772	69.2979
chr22	43474835	43475014	90	1.06241	7.09961	2.30491e-10	Uninfected_unique	198.2	94.9045
chr22	43892577	43892870	147	1.69434	7.3659	4.88362e-27	Uninfected_unique	296.743	91.6924
chr22	43895630	43895932	151	2.39585	7.08717	2.24141e-43	Uninfected_unique	311.934	59.2706
chr22	43896099	43896318	110	2.21228	7.06496	1.18963e-36	Uninfected_unique	288.235	62.199
chr22	44698511	44698776	133	0.79295	6.98	1.97917e-06	Uninfected_unique	166.165	95.9044
chr22	44819516	44819715	100	1.18898	6.09815	3.02393e-07	Uninfected_unique	103.439	45.3698
chr22	46171048	46171276	114	-0.03854	8.85213	0.0121381	Uninfected_unique	455.991	468.336
chr22	46710212	46710439	114	0.63965	6.52971	0.000335542	Uninfected_unique	115.323	74.0221
chr22	46795372	46795571	100	0.7477	6.7543	1.74496e-05	Uninfected_unique	139.89	83.3119
chr22	47008295	47008493	99	0.43956	7.68074	0.000162878	Uninfected_unique	238.943	176.187
chr22	47030943	47031158	108	1.69417	7.18419	3.74994e-24	Uninfected_unique	261.61	80.846
chr22	47031271	47031508	119	1.73717	7.23342	3.05343e-26	Uninfected_unique	274.756	82.415
chr22	47254978	47255286	154	1.73043	6.50836	1.73733e-16	Uninfected_unique	165.832	49.9754
chr22	47985887	47986165	139	0.76674	6.89123	5.78968e-06	Uninfected_unique	154.836	91.0041
chr22	48479170	48479411	121	0.59433	7.48426	1.13897e-05	Uninfected_unique	220.01	145.724
chr22	48487172	48487365	97	0.47856	6.75447	0.00138136	Uninfected_unique	127.447	91.4677
chr22	49016649	49016884	118	1.63127	6.67008	2.57142e-16	Uninfected_unique	179.236	57.858
chr22	49152955	49153219	132	1.37428	6.84535	1.05648e-13	Uninfected_unique	185.142	71.4177
chr22	49258230	49258492	131	1.47311	5.9542	3.54308e-09	Uninfected_unique	103.304	37.2107
chr22	50819659	50819867	104	1.14649	6.27873	1.23348e-07	Uninfected_unique	115.518	52.1822
chr22	50836181	50836369	94	0.87823	6.59876	3.45716e-06	Uninfected_unique	131.405	71.4888
chr20	279095	279440	173	0.24836	8.31636	0.00148035	Uninfected_unique	347.421	292.477
chr20	1857616	1857942	163	1.59297	7.35967	6.09419e-24	Uninfected_unique	285.264	94.5618
chr20	1878756	1878931	88	0.45643	6.70863	0.00179339	Uninfected_unique	122.518	89.2893
chr20	1918527	1918702	88	0.71131	6.53073	0.000107522	Uninfected_unique	118.306	72.2575
chr20	2804799	2805404	303	1.39193	7.32082	1.90903e-18	Uninfected_unique	258.996	98.6916
chr20	3154523	3154716	97	-0.09465	9.08066	0.00688748	Uninfected_unique	523.968	559.496
chr20	3421560	3421773	107	1.36415	6.30193	5.63752e-10	Uninfected_unique	126.589	49.1751
chr20	3826912	3827108	98	0.10285	9.03113	0.0064138	Uninfected_unique	542.153	504.848
chr20	3878254	3878429	88	0.28403	7.7081	0.00264338	Uninfected_unique	230.739	189.504
chr20	4013493	4013727	117	1.59775	6.69505	6.88642e-16	Uninfected_unique	180.259	59.556
chr20	4954929	4955104	88	0.15983	7.26198	0.0142276	Uninfected_unique	162.23	145.217
chr20	5263870	5264078	104	0.9986	5.91461	3.32921e-05	Uninfected_unique	85.2667	42.6747
chr20	5652139	5652314	88	0.2827	8.35309	0.000624295	Uninfected_unique	360.646	296.47
chr20	5743162	5743371	105	0.80838	6.55434	2.0147e-05	Uninfected_unique	124.373	71.0198
chr20	5784373	5784558	93	0.48284	7.67478	6.23619e-05	Uninfected_unique	241.554	172.848
chr20	15823625	15823805	90	0.87469	5.60229	0.000468195	Uninfected_unique	65.7826	35.876
chr20	15837838	15838077	120	1.29102	6.28362	5.93613e-09	Uninfected_unique	121.864	49.8013
chr20	15838102	15838353	126	1.23784	6.30643	1.68448e-08	Uninfected_unique	121.545	51.5361
chr20	15917884	15918168	142	1.39009	5.9795	1.73604e-08	Uninfected_unique	102.15	38.9744
chr20	15966668	15966898	115	1.49206	6.0279	1.21629e-09	Uninfected_unique	109.435	38.9046
chr20	16006058	16006305	124	1.20159	6.12203	1.82081e-07	Uninfected_unique	105.626	45.9259
chr20	16009656	16009871	108	1.06431	5.80367	2.12798e-05	Uninfected_unique	80.7743	38.6264
chr20	16023279	16023877	299	2.37857	6.69827	7.38011e-33	Uninfected_unique	236.805	45.5376
chr20	16082419	16082619	100	1.50185	6.38368	5.10223e-12	Uninfected_unique	140.517	49.6167
chr20	16207744	16208085	171	1.40833	6.67069	1.09521e-12	Uninfected_unique	165.979	62.5321
chr20	16238451	16238626	88	1.75952	6.40448	6.05892e-16	Uninfected_unique	155.874	46.0369
chr20	16239659	16239881	111	1.88	6.65761	8.14796e-21	Uninfected_unique	193.691	52.6226
chr20	16240624	16240853	115	1.58972	6.63646	1.5023e-15	Uninfected_unique	172.604	57.3452
chr20	17598251	17598432	91	0.7062	7.17328	4.52198e-06	Uninfected_unique	184.36	113
chr20	17632540	17632743	102	0.58528	7.03722	0.000103865	Uninfected_unique	160.882	107.231
chr20	19658938	19659274	168	1.35361	6.37703	3.50384e-10	Uninfected_unique	132.867	51.9923
chr20	20317936	20318217	141	1.00141	6.65722	1.25005e-07	Uninfected_unique	142.807	71.3338
chr20	20336960	20337178	109	1.7457	7.48077	1.2333e-30	Uninfected_unique	327.107	97.5399
chr20	20337365	20337632	134	1.87759	7.64313	2.70121e-39	Uninfected_unique	383.192	104.281
chr20	20337710	20338080	185	1.84329	7.73361	2.6798e-40	Uninfected_unique	403.173	112.358
chr20	20338103	20338407	152	1.69983	7.60248	1.29502e-31	Uninfected_unique	350.287	107.826
chr20	20338491	20338767	138	1.51637	7.44178	3.57169e-23	Uninfected_unique	294.06	102.793
chr20	21083558	21083736	89	0.6336	6.64145	0.000239232	Uninfected_unique	124.349	80.1511
chr20	24606637	24606876	120	0.89734	6.57374	3.16783e-06	Uninfected_unique	130.004	69.7959
chr20	25529174	25529366	96	0.96172	7.10871	5.03657e-09	Uninfected_unique	192.614	98.8967
chr20	25542622	25542841	110	1.75764	6.43826	3.57249e-16	Uninfected_unique	159.463	47.1583
chr20	25840480	25840665	93	0.87431	7.23205	2.08517e-08	Uninfected_unique	203.545	111.037
chr20	25846747	25846989	121	0.71544	7.60423	1.46602e-07	Uninfected_unique	249.336	151.851
chr20	26053455	26053643	94	0.65387	7.07711	2.812e-05	Uninfected_unique	169.371	107.648
chr20	26054878	26055055	89	0.53339	7.15244	0.000179843	Uninfected_unique	171.152	118.254
chr20	26201974	26202165	96	0.4396	7.32848	0.000548613	Uninfected_unique	187.18	138.015
chr20	26213309	26213551	121	-0.0872	7.12847	0.0212559	Uninfected_unique	135.756	144.214
chr20	29446901	29447114	107	0.60736	6.77127	0.000185724	Uninfected_unique	134.826	88.499
chr20	29447264	29447555	146	0.559	6.8772	0.000310487	Uninfected_unique	142.686	96.8513
chr20	29584055	29584264	105	0.32867	7.92578	0.000733935	Uninfected_unique	272.5	216.984
chr20	29595630	29595859	115	0.52119	7.67953	2.25199e-05	Uninfected_unique	245.593	171.128
chr20	29634670	29634869	100	0.70202	8.36489	5.13685e-11	Uninfected_unique	420.482	258.475
chr20	29648253	29648428	88	0.22917	8.88628	0.000668473	Uninfected_unique	512.307	437.062
chr20	29653104	29653369	133	0.63125	8.75329	1.58705e-11	Uninfected_unique	537.051	346.729
chr20	29653414	29653618	102	0.69355	8.43719	3.32315e-11	Uninfected_unique	440.795	272.557
chr20	30014890	30015142	126	1.27921	6.94785	7.49135e-13	Uninfected_unique	192.332	79.2448
chr20	30015312	30015633	161	1.48316	6.71894	2.44494e-14	Uninfected_unique	176.133	63.0035
chr20	30058028	30058239	106	1.61026	7.25621	3.60389e-23	Uninfected_unique	267.119	87.4921
chr20	30710334	30710556	111	1.17149	6.66888	1.50501e-09	Uninfected_unique	152.707	67.7963
chr20	30763538	30763718	90	1.67451	6.70436	1.38039e-17	Uninfected_unique	186.317	58.368
chr20	30764420	30764666	123	1.91452	6.97345	2.88759e-26	Uninfected_unique	243.995	64.7223
chr20	30764771	30765065	147	1.94387	6.80453	2.72902e-24	Uninfected_unique	219.255	56.9883
chr20	31071654	31072252	299	0.39341	8.59259	1.19227e-05	Uninfected_unique	442.427	336.832
chr20	31208969	31209177	104	1.51171	7.21836	4.45044e-20	Uninfected_unique	251.465	88.1877
chr20	32297895	32298117	111	1.36132	6.55573	2.68757e-11	Uninfected_unique	150.789	58.6911
chr20	32811706	32811992	143	1.09782	6.4578	7.84355e-08	Uninfected_unique	128.597	60.0832
chr20	32816959	32817136	89	1.64848	6.54774	1.60067e-15	Uninfected_unique	165.648	52.8379
chr20	32817169	32817610	221	1.73278	6.73202	4.52186e-19	Uninfected_unique	193.798	58.3083
chr20	33146350	33146540	95	0.94649	7.08547	1.04617e-08	Uninfected_unique	188.538	97.8314
chr20	33246414	33246611	99	1.44447	6.7132	1.43971e-13	Uninfected_unique	173.097	63.6005
chr20	33246664	33247305	321	1.45601	6.68046	1.31891e-13	Uninfected_unique	169.891	61.9252
chr20	33588445	33588656	106	0.66915	7.30067	4.51089e-06	Uninfected_unique	198.81	125.027
chr20	33734585	33734761	88	0.05061	8.57263	0.0129394	Uninfected_unique	387.468	374.112
chr20	33741462	33741731	135	1.88318	6.68922	3.0885e-21	Uninfected_unique	198.2	53.729
chr20	33741895	33742074	90	1.76086	6.70363	4.96798e-19	Uninfected_unique	191.88	56.6184
chr20	34029360	34029563	102	0.88639	6.24561	2.86356e-05	Uninfected_unique	103.165	55.8086
chr20	34589352	34589663	156	1.19928	6.3941	2.30587e-08	Uninfected_unique	127.446	55.5017
chr20	34680312	34680494	91	0.59274	7.38407	1.95189e-05	Uninfected_unique	205.136	136.022
chr20	34681034	34681227	97	0.6101	7.65717	2.37648e-06	Uninfected_unique	249.383	163.384
chr20	35099224	35099422	99	-0.01857	7.27609	0.022495	Uninfected_unique	154.002	155.997
chr20	35202264	35202456	96	0.00308	9.30809	0.0111836	Uninfected_unique	634.568	633.214
chr20	35470376	35470562	93	0.40116	7.91727	0.000157203	Uninfected_unique	277.79	210.356
chr20	36346634	36346937	152	1.58841	6.09453	3.35963e-11	Uninfected_unique	118.499	39.4055
chr20	36888944	36889134	95	1.30998	6.34067	1.21757e-09	Uninfected_unique	127.616	51.4707
chr20	37007850	37008057	104	1.33115	6.42724	2.54541e-10	Uninfected_unique	136.505	54.2543
chr20	37419194	37419369	88	0.56218	6.58742	0.000712104	Uninfected_unique	116.85	79.1397
chr20	39658073	39658272	100	-0.10217	9.60723	0.00383284	Uninfected_unique	752.812	808.058
chr20	40183706	40184106	200	1.49244	6.56206	3.10984e-13	Uninfected_unique	158.494	56.3303
chr20	42543221	42543396	88	1.39746	6.65267	1.85136e-12	Uninfected_unique	163.302	61.989
chr20	43214272	43214548	138	0.28607	9.08427	6.33251e-05	Uninfected_unique	599.371	491.564
chr20	43300316	43300513	99	0.89822	6.49114	4.91042e-06	Uninfected_unique	122.807	65.8919
chr20	43672809	43673004	98	0.23244	6.11264	0.0219156	Uninfected_unique	75.0022	63.8414
chr20	43941921	43942115	97	0.95362	6.89908	6.47664e-08	Uninfected_unique	166.098	85.7622
chr20	44274413	44274610	99	1.40765	6.43345	3.26198e-11	Uninfected_unique	140.778	53.0627
chr20	44642501	44642694	97	0.30844	8.16642	0.000596135	Uninfected_unique	319.714	258.174
chr20	45417435	45418144	355	1.53965	7.11085	1.67488e-19	Uninfected_unique	235.678	81.066
chr20	46912030	46912228	99	1.24025	5.90839	6.13275e-07	Uninfected_unique	92.3164	39.0775
chr20	47463082	47463287	103	-0.1464	7.41138	0.0141463	Uninfected_unique	161.813	179.095
chr20	47552449	47552743	147	1.11373	6.55624	2.83768e-08	Uninfected_unique	138.439	63.9723
chr20	47894152	47894407	128	0.11472	10.088	0.00150519	Uninfected_unique	1132.57	1045.99
chr20	48251344	48251565	111	0.67249	7.30225	4.51089e-06	Uninfected_unique	199.258	125.019
chr20	48310231	48310448	109	0.22739	6.88202	0.012116	Uninfected_unique	127.62	109.011
chr20	48538806	48539015	105	1.09674	6.69119	1.1329e-08	Uninfected_unique	151.121	70.6599
chr20	49158274	49158451	89	0.17855	6.1496	0.0251339	Uninfected_unique	75.5246	66.7328
chr20	49437897	49438094	99	0.20016	8.0551	0.00478854	Uninfected_unique	285.072	248.142
chr20	50152745	50152926	91	0.10275	7.20766	0.0195781	Uninfected_unique	153.175	142.645
chr20	52558624	52558856	116	0.13574	6.86735	0.0201576	Uninfected_unique	122.38	111.39
chr20	52867067	52867292	113	0.95889	6.61441	4.69269e-07	Uninfected_unique	136.604	70.2762
chr20	55866135	55866349	107	0.55421	7.46522	3.34479e-05	Uninfected_unique	214.127	145.827
chr20	55867825	55868035	105	0.60362	7.13843	4.42716e-05	Uninfected_unique	173.674	114.295
chr20	55965341	55965527	93	0.19284	9.88483	0.000129845	Uninfected_unique	1010.78	884.311
chr20	56057419	56057596	89	0.11599	8.87245	0.00603492	Uninfected_unique	487.901	450.21
chr20	56058373	56058574	101	0.33556	7.69549	0.0012399	Uninfected_unique	232.852	184.53
chr20	56268478	56268658	90	0.98288	6.94949	1.48275e-08	Uninfected_unique	173.757	87.9158
chr20	56274571	56274750	90	0.54039	6.90078	0.000393703	Uninfected_unique	144.105	99.0843
chr20	57225844	57226030	93	-0.13728	8.65556	0.00574562	Uninfected_unique	384.521	422.908
chr20	57244856	57245032	88	0.28545	6.30618	0.0156214	Uninfected_unique	87.3602	71.6778
chr20	59906562	59906798	118	1.50004	6.84821	1.02167e-15	Uninfected_unique	193.774	68.5075
chr20	60228751	60228949	99	1.57071	6.24279	5.21311e-12	Uninfected_unique	130.522	43.9391
chr20	60518137	60518344	104	1.46275	6.65757	1.52477e-13	Uninfected_unique	167.608	60.8082
chr20	60557601	60557805	102	1.67301	6.87101	3.03305e-19	Uninfected_unique	209.023	65.5491
chr20	60973082	60973269	94	1.49845	6.9695	6.32088e-17	Uninfected_unique	210.653	74.5572
chr20	61084344	61084520	88	1.98079	7.05295	1.61093e-29	Uninfected_unique	263.808	66.8361
chr20	61550315	61550500	93	-0.16692	7.08518	0.0151177	Uninfected_unique	128.153	143.872
chr20	61592452	61592679	114	0.64268	7.07911	2.812e-05	Uninfected_unique	168.95	108.216
chr20	61798756	61798955	100	1.61979	7.23361	6.11536e-23	Uninfected_unique	263.837	85.8481
chr20	62074574	62074885	156	1.87626	7.10567	1.24621e-27	Uninfected_unique	263.891	71.8811
chr20	62177223	62177494	136	1.14375	7.63406	7.41497e-16	Uninfected_unique	295.279	133.638
chr20	62272641	62272816	88	0.23225	9.69018	4.69867e-05	Uninfected_unique	895.348	762.215
chr20	62327625	62327830	103	1.48884	7.7388	5.05815e-27	Uninfected_unique	357.852	127.502
chr20	62427547	62427763	108	0.9008	6.58684	2.43028e-06	Uninfected_unique	131.347	70.3481
chr20	62728270	62728446	88	1.46263	6.59005	5.07698e-13	Uninfected_unique	159.938	58.0303
chr20	62918060	62918308	124	1.52711	8.91547	1.47446e-61	Uninfected_unique	819.741	284.427
chr21	9431969	9432150	91	0.15251	7.60024	0.0114814	Uninfected_unique	204.576	184.054
chr21	9439189	9439435	123	1.55555	6.94247	8.85022e-18	Uninfected_unique	210.875	71.7395
chr21	9450225	9450409	92	0.5938	6.71904	0.000365513	Uninfected_unique	129.422	85.7545
chr21	9646293	9646468	88	1.01009	6.77955	3.23535e-08	Uninfected_unique	155.913	77.4131
chr21	9684139	9684489	175	0.77502	8.09106	4.03669e-11	Uninfected_unique	356.701	208.449
chr21	9730322	9730498	88	1.02338	8.28334	2.00361e-19	Uninfected_unique	444.189	218.524
chr21	9773303	9773571	134	0.70993	6.71709	4.03601e-05	Uninfected_unique	134.555	82.2603
chr21	9926328	9926517	95	0.90223	8.48296	1.11899e-17	Uninfected_unique	489.13	261.714
chr21	9929973	9930169	98	0.8171	7.74593	7.03755e-10	Uninfected_unique	284.933	161.723
chr21	9975224	9975501	139	0.72649	7.61455	7.58487e-08	Uninfected_unique	252.09	152.356
chr21	9976129	9976313	92	0.76875	7.52373	4.72835e-08	Uninfected_unique	240.202	140.981
chr21	9993930	9994105	88	1.03804	7.30975	3.46954e-11	Uninfected_unique	227.35	110.717
chr21	10029676	10029940	132	1.07646	7.27766	1.14823e-11	Uninfected_unique	225.329	106.849
chr21	10030663	10030894	116	0.90962	7.42103	8.45477e-10	Uninfected_unique	234.89	125.038
chr21	10113543	10113789	123	0.58882	7.54414	8.25351e-06	Uninfected_unique	228.896	152.19
chr21	10114724	10114916	96	0.60895	7.68466	2.32109e-06	Uninfected_unique	254.079	166.593
chr21	10119960	10120135	88	0.49363	7.99346	1.13742e-05	Uninfected_unique	302.392	214.769
chr21	10135080	10135298	109	0.44879	8.16387	1.51159e-05	Uninfected_unique	335.058	245.482
chr21	10157138	10157318	90	0.56186	8.46513	2.51753e-08	Uninfected_unique	429.365	290.864
chr21	10168524	10168751	114	0.8091	8.10359	7.62218e-12	Uninfected_unique	364.087	207.798
chr21	10381815	10382024	105	0.50356	7.12493	0.000338541	Uninfected_unique	166.192	117.226
chr21	10412205	10412404	100	0.28835	6.55532	0.0111902	Uninfected_unique	103.932	85.1034
chr21	11046666	11046903	119	0.55146	8.24911	2.40782e-07	Uninfected_unique	368.326	251.32
chr21	11055783	11055971	94	0.43463	8.18161	2.24044e-05	Uninfected_unique	337.542	249.742
chr21	11064646	11064826	90	0.69566	7.99385	6.61956e-09	Uninfected_unique	324.411	200.3
chr21	11127280	11127526	123	1.25364	9.04866	4.41012e-46	Uninfected_unique	817.73	342.947
chr21	11128072	11128399	164	1.09494	9.00918	9.38128e-35	Uninfected_unique	753.075	352.556
chr21	11156611	11156871	130	0.79088	7.43149	4.79528e-08	Uninfected_unique	227.06	131.239
chr21	15308141	15308320	90	0.94576	6.77957	2.21352e-07	Uninfected_unique	152.477	79.1595
chr21	18664710	18664885	88	1.15416	6.6126	5.62213e-09	Uninfected_unique	145.985	65.5953
chr21	19091706	19091959	127	1.79234	6.47174	5.68775e-17	Uninfected_unique	165.182	47.6885
chr21	19093123	19093300	89	1.70775	6.27031	6.07291e-14	Uninfected_unique	139.506	42.708
chr21	30384311	30384506	98	1.42312	6.59869	1.37681e-12	Uninfected_unique	158.71	59.1838
chr21	33402472	33403056	292	1.20082	6.61008	1.10861e-09	Uninfected_unique	148.106	64.4304
chr21	36415960	36416140	90	0.34118	6.63591	0.00670035	Uninfected_unique	111.934	88.3599
chr21	37270153	37270426	137	1.28644	6.08925	6.56861e-08	Uninfected_unique	106.335	43.5932
chr21	37792311	37792489	89	0.77414	6.9292	4.14465e-06	Uninfected_unique	159.374	93.1917
chr21	39128884	39129144	130	0.90307	6.78919	6.02297e-07	Uninfected_unique	151.243	80.8769
chr21	40690307	40690493	93	-0.04442	7.04099	0.0238005	Uninfected_unique	129.677	133.732
chr21	40827280	40827502	111	0.45247	6.30384	0.00522882	Uninfected_unique	92.4163	67.5369
chr21	42542420	42542606	93	0.4329	6.34177	0.00539633	Uninfected_unique	94.2369	69.808
chr21	43342091	43342355	132	-0.00216	7.51841	0.0208388	Uninfected_unique	183.207	183.481
chr21	43373934	43374120	93	1.52391	7.09364	8.1784e-19	Uninfected_unique	231.617	80.5429
chr21	43374207	43374387	90	1.5237	7.18801	5.82067e-20	Uninfected_unique	247.256	85.9938
chr21	43498065	43498343	139	1.1877	6.90442	3.17764e-11	Uninfected_unique	180.802	79.3726
chr21	44585635	44585843	104	0.05724	8.74787	0.0112672	Uninfected_unique	438.517	421.459
chr21	44733190	44733445	128	0.40906	7.77957	0.00024837	Uninfected_unique	253.194	190.684
chr21	44756159	44756346	94	1.66992	7.49176	1.51133e-28	Uninfected_unique	321.065	100.901
chr21	44756696	44756961	133	1.59025	7.6738	3.24571e-29	Uninfected_unique	354.324	117.676
chr21	44985185	44985509	162	0.98276	5.94513	2.77706e-05	Uninfected_unique	86.6129	43.8271
chr21	45121129	45121334	103	0.73317	6.78518	2.61476e-05	Uninfected_unique	142.199	85.544
chr21	45513158	45513350	96	0.494	6.9791	0.00056559	Uninfected_unique	149.718	106.308
chr21	45533929	45534161	116	0.74442	7.04483	3.70161e-06	Uninfected_unique	170.904	102.014
chr21	45594700	45594875	88	0.51355	8.23112	1.09867e-06	Uninfected_unique	359.014	251.488
chr21	46245089	46245268	90	1.6063	6.40025	1.20358e-13	Uninfected_unique	147.38	48.4055
chr21	46545161	46545393	116	-0.06595	7.44956	0.0194522	Uninfected_unique	170.85	178.841
chr21	46575893	46576349	228	2.16326	6.63075	1.73916e-26	Uninfected_unique	209.729	46.8222
chr21	46644348	46644546	99	1.26949	6.65506	1.21532e-10	Uninfected_unique	156.477	64.9076
chr21	46688400	46688710	155	1.94881	6.47664	5.03835e-20	Uninfected_unique	174.98	45.325
chr21	46760316	46760509	97	1.46423	6.15474	4.58786e-10	Uninfected_unique	118.345	42.8916
chr21	46920471	46920963	246	1.70975	7.48739	6.24943e-30	Uninfected_unique	324.543	99.217
chr21	47053577	47053800	112	0.93818	7.26236	1.88398e-09	Uninfected_unique	212.519	110.912
chr21	47217418	47217666	124	1.7111	6.48298	4.53528e-16	Uninfected_unique	161.852	49.4339
chr21	47452982	47453223	121	1.6679	6.55695	6.93477e-16	Uninfected_unique	167.835	52.8195
chr21	47510783	47511246	232	1.72125	6.56697	6.02926e-17	Uninfected_unique	172.159	52.2133
chr21	47621242	47621459	109	1.21408	6.16307	1.09517e-07	Uninfected_unique	109.146	47.047
chr21	47684870	47685110	120	0.98194	6.93091	2.34736e-08	Uninfected_unique	171.478	86.8191
chr21	47970492	47970814	161	0.51551	6.81493	0.000668269	Uninfected_unique	134.614	94.1686
chr7	129052	129402	175	1.27405	6.69374	6.16764e-11	Uninfected_unique	160.983	66.5661
chr7	205215	205431	108	1.82534	6.63167	1.87801e-19	Uninfected_unique	186.669	52.6733
chr7	230994	231451	229	0.99944	6.94831	7.45613e-09	Uninfected_unique	174.615	87.3412
chr7	231553	231744	96	1.09405	6.92821	5.48343e-10	Uninfected_unique	177.939	83.3543
chr7	283184	283382	99	1.5928	6.45906	8.28634e-14	Uninfected_unique	152.796	50.656
chr7	297926	298255	165	1.50861	7.42288	1.32593e-22	Uninfected_unique	289.453	101.728
chr7	401307	401488	91	1.24892	6.65757	1.21532e-10	Uninfected_unique	155.636	65.4858
chr7	591369	591965	298	2.12431	7.55284	1.12065e-46	Uninfected_unique	392.077	89.9272
chr7	628072	628512	220	1.59225	7.06609	3.69182e-20	Uninfected_unique	232.682	77.1698
chr7	887253	887457	102	1.00748	6.40143	1.17753e-06	Uninfected_unique	119.857	59.6186
chr7	1078105	1078690	293	1.80815	7.48632	4.9992e-33	Uninfected_unique	335.553	95.8193
chr7	1078738	1079033	148	1.82054	7.38259	2.95234e-31	Uninfected_unique	313.617	88.7897
chr7	1167734	1168106	186	1.91723	6.59701	9.79132e-21	Uninfected_unique	188.135	49.8111
chr7	1235794	1236351	279	2.44483	6.8474	1.29323e-38	Uninfected_unique	268.693	49.3502
chr7	1311709	1312544	418	2.18934	7.59228	6.05304e-51	Uninfected_unique	412.128	90.3598
chr7	1617312	1617547	118	2.04289	6.35109	3.70603e-20	Uninfected_unique	165.712	40.2145
chr7	1765071	1765265	97	1.25808	7.12441	6.16145e-14	Uninfected_unique	215.785	90.2197
chr7	1792505	1792704	100	0.52503	8.25743	6.42333e-07	Uninfected_unique	367.079	255.099
chr7	1866957	1867263	153	1.31319	6.78255	3.23252e-12	Uninfected_unique	173.542	69.8387
chr7	2139298	2139511	107	0.37246	9.11181	1.22271e-06	Uninfected_unique	629.49	486.259
chr7	2446486	2446699	107	0.48274	8.26082	2.60741e-06	Uninfected_unique	362.589	259.475
chr7	2500924	2501188	132	0.88498	6.86651	4.2692e-07	Uninfected_unique	158.573	85.8663
chr7	2569482	2569776	147	0.37145	8.79862	9.47525e-06	Uninfected_unique	506.474	391.507
chr7	2607342	2607532	95	0.56821	7.6928	6.52055e-06	Uninfected_unique	251.935	169.918
chr7	3019062	3019237	88	-0.00542	8.97101	0.0125623	Uninfected_unique	500.873	502.758
chr7	3621712	3622075	182	0.22691	6.66096	0.0161032	Uninfected_unique	109.472	93.5396
chr7	5244297	5244484	94	0.5238	6.23806	0.00252384	Uninfected_unique	90.5072	62.9511
chr7	5373000	5373175	88	1.29418	6.75051	1.09888e-11	Uninfected_unique	168.616	68.7563
chr7	5937220	5937404	92	0.04613	7.7305	0.0182592	Uninfected_unique	215.802	209.011
chr7	6710674	6711136	231	1.83486	6.88585	7.06802e-23	Uninfected_unique	223.368	62.6143
chr7	8192152	8192493	171	0.86446	6.30618	2.82952e-05	Uninfected_unique	106.774	58.6456
chr7	10504939	10505299	180	1.68572	6.20157	4.12255e-13	Uninfected_unique	132.003	41.0329
chr7	10505476	10505740	132	1.68531	6.22108	3.68952e-13	Uninfected_unique	133.782	41.5975
chr7	18573831	18574006	88	-0.0959	6.71395	0.0244374	Uninfected_unique	101.547	108.526
chr7	20708456	20708886	215	1.18331	6.76581	2.82814e-10	Uninfected_unique	163.99	72.2114
chr7	22484387	22484697	155	-0.0594	9.59427	0.007286	Uninfected_unique	757.221	789.048
chr7	22840540	22840715	88	1.56151	6.56601	2.2109e-14	Uninfected_unique	162.778	55.1487
chr7	23233097	23233274	89	0.46128	6.7636	0.00194465	Uninfected_unique	127.49	92.6013
chr7	23402842	23403070	114	0.52732	6.64971	0.000985312	Uninfected_unique	120.54	83.6359
chr7	23676889	23677266	189	1.22919	7.30549	7.19041e-15	Uninfected_unique	242.205	103.314
chr7	25058283	25059023	370	1.71563	7.15496	4.59541e-24	Uninfected_unique	258.277	78.6375
chr7	25891922	25892143	111	0.35381	7.01298	0.0034587	Uninfected_unique	146.006	114.252
chr7	26239913	26240124	106	0.08375	9.78484	0.00454583	Uninfected_unique	908.105	856.889
chr7	26682088	26682320	116	0.56154	6.29418	0.0018932	Uninfected_unique	95.3361	64.5977
chr7	26898482	26898712	115	0.17287	6.80419	0.0172195	Uninfected_unique	118.655	105.256
chr7	27084495	27084680	93	0.81088	6.72559	7.03401e-06	Uninfected_unique	140.17	79.9015
chr7	27084776	27084983	104	0.9428	6.61814	9.0549e-07	Uninfected_unique	136.196	70.8522
[truncated: 65,932 more rows]

## Sheet: ATAC Uninfected vs EBNA2-
chr	start	end	summit	M_value	A_value	P_value	Peak_Group	normalized_read_density_in_Uninfected	normalized_read_density_in_EBNA2-
chrY	284421	284615	97	0.34668	7.63244	0.00111935	Uninfected_unique	223.756	175.96
chrY	297409	297821	206	0.31762	7.98597	0.000815838	Uninfected_unique	283.024	227.096
chrY	1284108	1284290	91	0.58857	7.59141	6.92444e-06	Uninfected_unique	236.5	157.273
chrY	1367141	1367338	99	-0.1903	7.56205	0.00899284	Uninfected_unique	176.913	201.858
chrY	1392196	1392424	114	0.45527	6.34829	0.00468629	Uninfected_unique	95.4005	69.5826
chrY	1394952	1395128	88	0.1571	6.67506	0.0207442	Uninfected_unique	107.904	96.7715
chrY	1526266	1526451	93	0.45192	6.92169	0.00135044	Uninfected_unique	141.794	103.661
chrY	1556336	1556687	176	0.44378	7.13648	0.00092026	Uninfected_unique	164.093	120.642
chrY	1560934	1561223	145	0.12084	7.14458	0.0183705	Uninfected_unique	147.544	135.689
chrY	1570221	1570450	115	0.58489	7.06785	0.000115896	Uninfected_unique	164.312	109.547
chrY	1603804	1604014	105	0.06571	7.9482	0.0155114	Uninfected_unique	252.66	241.411
chrY	1650099	1650287	94	0.61611	5.95999	0.00200502	Uninfected_unique	77.0672	50.2808
chrY	2317612	2317804	96	0.52051	6.23355	0.00298273	Uninfected_unique	90.1218	62.8262
chrY	2368340	2368564	112	0.4002	6.97154	0.00223008	Uninfected_unique	144.171	109.246
chrY	2384724	2384971	124	0.32711	6.72662	0.00711596	Uninfected_unique	118.618	94.5539
chrY	2497749	2497924	88	0.18226	8.63451	0.0029426	Uninfected_unique	423.33	373.09
chrY	9989940	9990137	99	-0.51707	8.27268	8.55828e-07	Uninfected_unique	258.522	369.957
chrY	13241937	13242173	118	-0.316	7.2968	0.00360855	Uninfected_unique	140.927	175.436
chrY	13286128	13286333	103	-0.43639	8.82709	4.00376e-07	Uninfected_unique	390.423	528.326
chrY	13307331	13307563	116	-0.43188	8.30134	1.53012e-05	Uninfected_unique	271.611	366.401
chrY	13346646	13346920	137	-0.50305	7.40246	0.000133259	Uninfected_unique	142.117	201.409
chrY	13360095	13360273	89	-0.42126	7.4008	0.000556192	Uninfected_unique	146.035	195.555
chrY	13631169	13631344	88	0.07716	6.0491	0.0326343	Uninfected_unique	68.0102	64.4684
chrX	69088	69382	147	0.15835	7.68216	0.0103459	Uninfected_unique	216.967	194.414
chrX	334951	335143	96	0.32141	7.75767	0.00136063	Uninfected_unique	241.918	193.604
chrX	1333266	1333441	88	0.57192	7.00845	0.000172833	Uninfected_unique	156.977	105.602
chrX	1397802	1398015	107	0.41397	7.66153	0.000278444	Uninfected_unique	233.7	175.405
chrX	1398045	1398235	95	0.53709	7.59946	2.30886e-05	Uninfected_unique	233.618	161
chrX	1442207	1442442	118	0.49703	6.36188	0.00249128	Uninfected_unique	97.7073	69.2319
chrX	1444933	1445112	90	-0.29166	6.6371	0.0103993	Uninfected_unique	89.9636	110.12
chrX	1511539	1511866	164	0.32722	8.43554	0.00017116	Uninfected_unique	387.795	309.1
chrX	1572262	1572445	92	0.37128	8.61049	2.19078e-05	Uninfected_unique	444.528	343.663
chrX	1576268	1576470	101	0.59721	6.87684	0.000173809	Uninfected_unique	144.552	95.5534
chrX	1586100	1586458	179	0.5458	7.57687	2.09395e-05	Uninfected_unique	230.683	158.021
chrX	1606330	1606631	151	0.40509	7.1032	0.0015392	Uninfected_unique	158.215	119.482
chrX	1613174	1613365	96	0.26202	7.19153	0.0067284	Uninfected_unique	160.068	133.484
chrX	1620161	1620453	146	0.76418	7.12858	1.28807e-06	Uninfected_unique	182.363	107.373
chrX	1653464	1653703	120	0.33432	7.7838	0.00100596	Uninfected_unique	247.444	196.262
chrX	1700090	1700271	91	0.35184	5.86396	0.0160536	Uninfected_unique	65.7938	51.555
chrX	1780191	1780443	126	0.07893	6.96832	0.0228251	Uninfected_unique	128.693	121.841
chrX	2243217	2243439	111	0.05961	6.5923	0.0274556	Uninfected_unique	98.5036	94.5165
chrX	2367627	2367877	125	0.30129	6.41822	0.0118878	Uninfected_unique	94.9348	77.0421
chrX	2418334	2418687	177	0.44113	6.96853	0.00124008	Uninfected_unique	145.926	107.483
chrX	2433043	2433245	101	0.42277	7.15955	0.000956031	Uninfected_unique	165.528	123.483
chrX	2434724	2434984	130	0.20067	6.94767	0.014154	Uninfected_unique	132.331	115.147
chrX	2547685	2547884	100	0.49652	8.47106	4.65335e-07	Uninfected_unique	421.48	298.751
chrX	2548580	2548848	134	0.47009	8.58361	5.13248e-07	Uninfected_unique	451.523	325.963
chrX	2549149	2549514	183	0.48923	8.44346	7.58009e-07	Uninfected_unique	412.45	293.831
chrX	2549605	2549790	93	0.49154	8.28705	1.81922e-06	Uninfected_unique	370.369	263.431
chrX	3734105	3734602	249	0.14649	8.42508	0.00625119	Uninfected_unique	361.619	326.703
chrX	4673316	4673510	97	-0.05983	8.05703	0.0154218	Uninfected_unique	260.857	271.902
chrX	5566118	5566312	97	0.83346	6.30965	3.6477e-05	Uninfected_unique	105.887	59.4218
chrX	6141687	6141862	88	0.38207	6.51464	0.00616478	Uninfected_unique	104.378	80.093
chrX	6144837	6145033	98	0.1139	8.22149	0.0104858	Uninfected_unique	310.498	286.927
chrX	6656688	6656872	92	0.25907	8.39262	0.000975433	Uninfected_unique	367.641	307.211
chrX	7001156	7001331	88	0.2971	8.31271	0.000578103	Uninfected_unique	352.446	286.851
chrX	7027058	7027301	122	0.36074	7.66092	0.000921902	Uninfected_unique	229.331	178.595
chrX	9309910	9310222	156	-0.05247	7.32506	0.0210689	Uninfected_unique	157.458	163.29
chrX	9498927	9499118	96	0.16185	6.5141	0.0211938	Uninfected_unique	96.6719	86.4129
chrX	9677061	9677254	97	-0.08243	6.9126	0.0231994	Uninfected_unique	117.083	123.967
chrX	9853310	9853493	92	0.24327	6.34174	0.0186273	Uninfected_unique	88.2409	74.5484
chrX	9963891	9964076	93	0.20489	6.7227	0.0161287	Uninfected_unique	113.39	98.3774
chrX	9983820	9983996	88	0.37978	8.39047	4.37737e-05	Uninfected_unique	382.777	294.185
chrX	10053373	10053553	90	0.65017	6.37791	0.000432497	Uninfected_unique	104.184	66.3868
chrX	10087554	10087736	91	0.45238	7.53869	0.000201627	Uninfected_unique	217.501	158.958
chrX	10157669	10157932	132	0.38927	6.87336	0.00297102	Uninfected_unique	134.177	102.446
chrX	11162507	11162682	88	0.37343	6.27369	0.00889021	Uninfected_unique	88.0594	67.977
chrX	11811341	11811555	107	0.39543	7.81779	0.000274815	Uninfected_unique	258.766	196.73
chrX	12516045	12516229	92	-0.00918	6.46528	0.02986	Uninfected_unique	88.0768	88.639
chrX	12533627	12533825	99	0.25089	6.41615	0.0158256	Uninfected_unique	93.1572	78.2872
chrX	12832695	12832872	89	0.24335	6.27777	0.0186008	Uninfected_unique	84.416	71.3131
chrX	12907450	12907693	122	0.67424	7.08513	1.17775e-05	Uninfected_unique	171.522	107.486
chrX	12964963	12965178	108	0.32406	6.94193	0.00522508	Uninfected_unique	137.564	109.889
chrX	12992686	12992863	89	0.12297	8.48375	0.00762553	Uninfected_unique	373.57	343.048
chrX	12994131	12994366	118	0.27222	7.99664	0.0016973	Uninfected_unique	280.674	232.41
chrX	13023901	13024084	92	0.12538	6.57026	0.0244444	Uninfected_unique	99.2469	90.9858
chrX	13031973	13032159	93	0.64766	6.32525	0.000593552	Uninfected_unique	100.363	64.063
chrX	13099879	13100149	135	0.98062	6.7338	1.22499e-07	Uninfected_unique	149.511	75.7666
chrX	13103752	13103948	98	0.96838	6.29231	4.26211e-06	Uninfected_unique	109.63	56.0297
chrX	13505142	13505317	88	0.36902	6.807	0.00469349	Uninfected_unique	127.249	98.5299
chrX	13709917	13710103	93	0.49712	6.83563	0.000830148	Uninfected_unique	135.692	96.1403
chrX	13740412	13740607	98	0.48348	6.59618	0.00209169	Uninfected_unique	114.398	81.8233
chrX	13768426	13768609	92	0.12593	5.91615	0.0326671	Uninfected_unique	63.0802	57.8075
chrX	15800567	15800750	92	0.62107	6.5064	0.000391931	Uninfected_unique	112.746	73.3063
chrX	16901389	16901659	135	0.31817	7.92228	0.000909797	Uninfected_unique	270.853	217.247
chrX	16965339	16965514	88	0.2995	8.63096	0.000187092	Uninfected_unique	439.802	357.354
chrX	19352421	19352719	149	0.22008	7.25608	0.00963127	Uninfected_unique	164.977	141.636
chrX	19390410	19390605	98	-0.01637	7.22689	0.0228613	Uninfected_unique	148.952	150.652
chrX	19400972	19401165	97	0.07973	6.46843	0.0279131	Uninfected_unique	91.0316	86.1372
chrX	19761634	19761891	129	0.62882	6.95848	6.47463e-05	Uninfected_unique	154.653	100.015
chrX	19771277	19771452	88	0.56899	7.00018	0.000166969	Uninfected_unique	155.921	105.105
chrX	19776743	19776986	122	0.60079	6.82718	0.000179895	Uninfected_unique	139.834	92.2058
chrX	19819393	19819586	97	0.40032	7.07678	0.00196866	Uninfected_unique	155.088	117.508
chrX	19859146	19859330	92	0.54741	6.76721	0.000500324	Uninfected_unique	131.682	90.1031
chrX	19882975	19883150	88	0.39275	7.44021	0.00091443	Uninfected_unique	198.995	151.569
chrX	19893376	19893605	115	0.23583	7.27987	0.00765531	Uninfected_unique	168.638	143.207
chrX	19902038	19902285	124	0.67023	6.82786	6.12816e-05	Uninfected_unique	143.308	90.0557
chrX	19906369	19906556	94	0.44112	8.33564	8.44356e-06	Uninfected_unique	376.42	277.257
chrX	19923027	19923202	88	0.16415	6.69305	0.0195732	Uninfected_unique	109.526	97.7466
chrX	20085373	20085548	88	0.31552	6.63824	0.0084319	Uninfected_unique	111.122	89.2933
chrX	21457023	21457242	110	0.73393	6.2543	0.000245556	Uninfected_unique	98.4463	59.1922
chrX	21498098	21498281	92	0.87707	5.91288	0.000110334	Uninfected_unique	81.6519	44.4572
chrX	23791788	23791963	88	0.18481	6.47112	0.0199651	Uninfected_unique	94.5841	83.2117
chrX	24171392	24171580	94	0.62724	6.56424	0.00029967	Uninfected_unique	117.609	76.142
chrX	24665413	24665647	117	0.37994	6.64321	0.00527961	Uninfected_unique	114.023	87.6231
chrX	25039052	25039306	127	0.34727	7.23362	0.00239623	Uninfected_unique	169.749	133.434
chrX	26801720	26801908	94	0.25011	6.44968	0.0158794	Uninfected_unique	95.3218	80.1497
chrX	29496590	29496789	100	0.1522	7.28243	0.0149901	Uninfected_unique	164.111	147.68
chrX	29573952	29574209	129	-0.04498	7.79089	0.0179266	Uninfected_unique	218.033	224.937
chrX	30595657	30595871	107	0.03957	7.14053	0.023074	Uninfected_unique	143.044	139.174
chrX	37604727	37604905	89	0.44871	6.69696	0.00240647	Uninfected_unique	121.206	88.8072
chrX	37635892	37636161	135	0.88278	6.53728	4.49915e-06	Uninfected_unique	126.121	68.3984
chrX	37645944	37646193	125	0.46945	7.25834	0.000399696	Uninfected_unique	180.151	130.112
chrX	38664107	38664425	159	-0.01332	8.99788	0.0123187	Uninfected_unique	508.894	513.614
chrX	38664857	38665263	203	0.29416	8.40962	0.000423832	Uninfected_unique	376.551	307.095
chrX	39004285	39004521	118	0.19565	7.54428	0.00836424	Uninfected_unique	199.757	174.424
chrX	39714480	39714733	127	0.60831	7.52641	5.01957e-06	Uninfected_unique	227.633	149.319
chrX	39714966	39715273	154	0.72849	7.32384	7.6542e-07	Uninfected_unique	206.226	124.465
chrX	39872604	39872965	181	0.33846	7.60695	0.00135562	Uninfected_unique	219.212	173.371
chrX	39942576	39942760	92	-0.29655	7.30354	0.00447852	Uninfected_unique	142.544	175.073
chrX	39956966	39957256	145	0.09415	8.97072	0.00756215	Uninfected_unique	518.354	485.607
chrX	39958922	39959196	137	0.12588	8.57344	0.00707765	Uninfected_unique	397.933	364.683
chrX	39964035	39964219	92	0.11042	8.65442	0.0077448	Uninfected_unique	418.658	387.811
chrX	39965574	39965803	115	0.09201	8.60729	0.00956896	Uninfected_unique	402.626	377.749
chrX	40017493	40017760	134	0.31176	7.15965	0.00442191	Uninfected_unique	159.292	128.335
chrX	40609211	40609432	111	0.2573	6.75185	0.011807	Uninfected_unique	117.825	98.5784
chrX	41112844	41113214	185	-0.21125	7.41109	0.00865024	Uninfected_unique	158.185	183.129
chrX	41135087	41135307	110	-0.16205	7.37015	0.0127182	Uninfected_unique	156.403	174.996
chrX	41591021	41591246	113	0.74179	6.38799	0.000141158	Uninfected_unique	108.3	64.7629
chrX	41593837	41594058	111	0.05399	8.43858	0.0133977	Uninfected_unique	353.502	340.517
chrX	41596367	41596612	123	0.36756	6.4287	0.00754847	Uninfected_unique	97.8487	75.8417
chrX	42474483	42474668	93	0.46645	6.52743	0.00260589	Uninfected_unique	108.433	78.4774
chrX	42793626	42793944	159	0.83088	7.03558	4.16664e-07	Uninfected_unique	174.977	98.3696
chrX	42802242	42802633	196	0.45831	8.41569	2.7367e-06	Uninfected_unique	400.274	291.335
chrX	44756892	44757220	164	0.52335	7.04003	0.000328527	Uninfected_unique	157.773	109.771
chrX	44758044	44758303	130	0.18288	7.25042	0.0126492	Uninfected_unique	162.226	142.912
chrX	44765397	44765598	101	0.38124	6.58037	0.00570235	Uninfected_unique	109.212	83.8507
chrX	46405239	46405425	93	-0.04727	8.12919	0.0154139	Uninfected_unique	275.433	284.607
chrX	46570768	46570943	88	0.60961	7.41642	9.96725e-06	Uninfected_unique	211.018	138.296
chrX	46838099	46838314	108	0.47051	6.24743	0.00496882	Uninfected_unique	89.4299	64.5424
chrX	47052429	47052637	104	0.21593	8.91289	0.000877253	Uninfected_unique	519.455	447.246
chrX	47428388	47428592	102	0.18605	6.88409	0.0161308	Uninfected_unique	125.986	110.742
chrX	47665306	47665481	88	0.2717	6.88078	0.00933041	Uninfected_unique	129.484	107.257
chrX	47862796	47863049	127	0.20055	7.96	0.00523838	Uninfected_unique	266.922	232.281
chrX	47935746	47936040	147	0.4905	6.66527	0.00167988	Uninfected_unique	120.302	85.6286
chrX	47942666	47942858	96	0.53967	6.23361	0.00206496	Uninfected_unique	90.7261	62.413
chrX	48326685	48326951	133	-0.00973	7.67326	0.0196422	Uninfected_unique	203.431	204.808
chrX	48530196	48530536	170	0.30832	7.3837	0.00316768	Uninfected_unique	185.833	150.075
chrX	48681499	48681732	117	-0.23139	7.17206	0.00940945	Uninfected_unique	133.1	156.255
chrX	48768217	48768392	88	0.27962	8.44129	0.000549653	Uninfected_unique	382.973	315.496
chrX	48803117	48803300	92	0.19781	6.73266	0.016133	Uninfected_unique	113.895	99.3023
chrX	48957190	48957392	101	0.22748	8.65756	0.00111861	Uninfected_unique	436.943	373.204
chrX	49011694	49011880	93	0.14576	8.45515	0.00629903	Uninfected_unique	369.141	333.668
chrX	49020474	49020677	102	0.17923	8.36818	0.0043642	Uninfected_unique	351.601	310.525
chrX	49033939	49034170	116	-0.05919	7.66001	0.0183288	Uninfected_unique	198.145	206.444
chrX	49114549	49114802	127	0.06287	7.5753	0.0187632	Uninfected_unique	194.92	186.608
chrX	49187927	49188104	89	-0.45908	7.5374	0.000170073	Uninfected_unique	158.447	217.812
chrX	49354387	49354698	156	-0.64497	7.78072	3.36249e-07	Uninfected_unique	175.854	274.984
chrX	53019272	53019493	111	0.01491	6.8684	0.0260518	Uninfected_unique	117.446	116.239
chrX	53101567	53101794	114	0.17671	8.24308	0.00524683	Uninfected_unique	322.116	284.982
chrX	53313895	53314097	101	0.07568	6.71914	0.025861	Uninfected_unique	108.157	102.629
chrX	53346756	53346997	121	0.51409	6.79389	0.000767029	Uninfected_unique	132.6	92.851
chrX	53463028	53463231	102	0.68917	6.6252	0.000118584	Uninfected_unique	125.347	77.7416
chrX	53741866	53742041	88	0.40525	6.66506	0.00358963	Uninfected_unique	116.783	88.1834
chrX	54522382	54522752	185	-0.01958	7.01889	0.0245289	Uninfected_unique	128.81	130.57
chrX	54722327	54722525	99	0.36084	6.18643	0.00966926	Uninfected_unique	82.5302	64.2672
chrX	55196287	55196494	104	0.2051	6.86942	0.0140855	Uninfected_unique	125.537	108.901
chrX	55516157	55516448	146	0.11334	8.02049	0.0119109	Uninfected_unique	270.064	249.66
chrX	55945835	55946061	113	0.19819	6.71897	0.0161287	Uninfected_unique	112.835	98.3515
chrX	56790308	56790522	107	0.33822	8.11517	0.000384605	Uninfected_unique	311.757	246.605
chrX	57936224	57936423	100	0.36054	7.64844	0.000898695	Uninfected_unique	227.34	177.069
chrX	62408101	62408365	132	-0.47306	7.89769	2.79329e-05	Uninfected_unique	202.413	280.96
chrX	64888500	64888703	102	0.27937	7.9909	0.0016851	Uninfected_unique	280.253	230.915
chrX	67872771	67873002	116	-0.15843	7.04053	0.016944	Uninfected_unique	124.613	139.077
chrX	68759368	68759632	132	0.44262	6.76155	0.00224519	Uninfected_unique	126.488	93.0697
chrX	69253338	69253557	110	-0.03752	7.00354	0.0244313	Uninfected_unique	126.657	129.994
chrX	69591969	69592187	109	-0.51019	7.48545	7.42363e-05	Uninfected_unique	150.16	213.863
chrX	69618830	69619069	120	0.37184	6.5341	0.00623545	Uninfected_unique	105.421	81.469
chrX	69672005	69672193	94	0.13281	7.69045	0.012684	Uninfected_unique	216.295	197.272
chrX	69674274	69674489	108	0.37737	8.82302	5.57995e-06	Uninfected_unique	516.171	397.369
chrX	70272678	70272886	104	0.11881	7.83189	0.0130978	Uninfected_unique	237.42	218.651
chrX	70318253	70318450	99	0.18866	6.81506	0.0161433	Uninfected_unique	120.208	105.473
chrX	70323131	70323335	102	0.19441	6.83131	0.0150841	Uninfected_unique	121.812	106.455
chrX	70349060	70349299	120	0.16998	6.9842	0.0160863	Uninfected_unique	134.288	119.363
chrX	70417983	70418158	88	0.17755	6.51499	0.0211938	Uninfected_unique	97.2593	85.997
chrX	70842182	70842357	88	0.17949	8.56422	0.00338133	Uninfected_unique	402.813	355.69
chrX	70917284	70917512	114	0.11625	7.64737	0.0144728	Uninfected_unique	208.73	192.571
chrX	70998279	70998512	117	0.27063	6.75227	0.0107732	Uninfected_unique	118.405	98.1526
chrX	71002630	71003059	215	0.15485	7.40938	0.0134411	Uninfected_unique	179.371	161.116
chrX	71003741	71004019	139	0.07122	7.62233	0.0176973	Uninfected_unique	201.962	192.234
chrX	71346526	71346726	100	-0.20758	6.74466	0.0161365	Uninfected_unique	99.7932	115.236
chrX	71526805	71527108	152	0.33815	6.99972	0.00434932	Uninfected_unique	143.887	113.823
chrX	73770174	73770485	156	0.27335	6.71836	0.0106867	Uninfected_unique	115.763	95.7822
chrX	75363114	75363298	92	0.14366	6.86677	0.0191743	Uninfected_unique	122.667	111.04
chrX	75647891	75648335	222	-0.04781	7.41304	0.0208133	Uninfected_unique	167.63	173.278
chrX	84258086	84258293	104	0.26263	7.73638	0.0032755	Uninfected_unique	233.567	194.694
chrX	88735780	88735959	90	0.57109	6.17492	0.00188186	Uninfected_unique	88.0631	59.276
chrX	91025903	91026118	108	0.60338	6.24765	0.00119509	Uninfected_unique	93.6586	61.6471
chrX	95940213	95940435	111	-0.04387	9.18239	0.0101793	Uninfected_unique	572.231	589.899
chrX	96423720	96423899	90	0.78693	6.23825	0.000108125	Uninfected_unique	99.162	57.4719
chrX	99940748	99940932	92	0.2614	6.31556	0.0171194	Uninfected_unique	87.2002	72.7492
chrX	100194367	100194572	103	0.34433	6.40689	0.00842629	Uninfected_unique	95.6077	75.3077
chrX	100623877	100624153	138	0.57339	6.44256	0.000937848	Uninfected_unique	106.098	71.3017
chrX	100625927	100626358	216	0.8597	6.78871	1.43419e-06	Uninfected_unique	148.937	82.0744
chrX	100851118	100851307	95	0.56956	6.31277	0.00132567	Uninfected_unique	96.8413	65.2538
chrX	102023555	102023736	91	0.04682	7.59731	0.0193249	Uninfected_unique	196.818	190.533
chrX	102118779	102119013	117	0.63123	6.04423	0.00151984	Uninfected_unique	82.1304	53.0255
chrX	102206602	102206787	93	0.34062	6.82586	0.00537862	Uninfected_unique	127.661	100.814
chrX	102509268	102509489	111	0.18777	7.34043	0.0112379	Uninfected_unique	172.962	151.854
chrX	102510017	102510253	118	0.18203	7.30866	0.0119369	Uninfected_unique	168.859	148.843
chrX	102719772	102719975	102	0.2882	6.70498	0.00962828	Uninfected_unique	115.287	94.4108
chrX	103181709	103181937	114	0.52592	6.63633	0.00113248	Uninfected_unique	119.369	82.904
chrX	103342976	103343151	88	0.37296	5.96115	0.012912	Uninfected_unique	70.8959	54.7456
chrX	103358097	103358272	88	0.0667	8.17921	0.0139877	Uninfected_unique	296.638	283.236
chrX	106243264	106243577	157	0.39642	7.04438	0.00214206	Uninfected_unique	151.439	115.054
chrX	106449090	106449388	149	0.36197	8.04978	0.000291341	Uninfected_unique	300.405	233.746
chrX	106709281	106709456	88	0.03216	7.069	0.0238997	Uninfected_unique	135.776	132.782
chrX	106713554	106713810	128	0.04425	6.96046	0.024806	Uninfected_unique	126.464	122.644
chrX	106944840	106945018	89	-0.13178	6.41975	0.0252438	Uninfected_unique	81.7904	89.6132
chrX	106985278	106985494	108	-0.00629	7.38545	0.0217479	Uninfected_unique	166.838	167.567
chrX	107020251	107020441	95	0.20751	7.36082	0.00918582	Uninfected_unique	176.629	152.966
chrX	107315317	107315520	102	0.12433	6.54712	0.0245302	Uninfected_unique	97.6322	89.5707
chrX	108776330	108776510	90	0.62901	6.00553	0.00177899	Uninfected_unique	79.8951	51.6618
chrX	109415410	109415800	195	0.71307	6.99132	9.44682e-06	Uninfected_unique	162.901	99.3732
chrX	109564990	109565196	103	0.56787	6.83121	0.000335631	Uninfected_unique	138.635	93.5247
chrX	109584533	109584883	175	0.20393	7.18034	0.0109738	Uninfected_unique	155.665	135.146
chrX	109693403	109693578	88	0.14961	6.64236	0.0219672	Uninfected_unique	105.213	94.8486
chrX	115014950	115015265	158	0.15347	7.19369	0.01588	Uninfected_unique	154.389	138.809
chrX	117662259	117662492	117	0.11884	6.99052	0.0197037	Uninfected_unique	132.508	122.031
chrX	117670757	117670960	102	0.11816	7.04091	0.0195418	Uninfected_unique	137.186	126.398
chrX	117973333	117973529	98	0.23399	6.42382	0.0172279	Uninfected_unique	93.1068	79.1669
chrX	118252852	118253041	95	0.70824	6.4599	0.00014138	Uninfected_unique	112.519	68.8689
chrX	118650253	118650506	127	0.33884	6.83853	0.00542951	Uninfected_unique	128.707	101.766
chrX	118798898	118799218	160	0.14076	7.51375	0.0133996	Uninfected_unique	191.889	174.051
chrX	118863986	118864161	88	0.26525	6.63305	0.0125706	Uninfected_unique	108.811	90.5363
chrX	118889274	118889498	112	0.23273	7.97144	0.00363721	Uninfected_unique	272.065	231.533
chrX	118890216	118890405	95	0.16328	8.00556	0.00777487	Uninfected_unique	271.95	242.85
chrX	118892235	118892416	91	-0.01299	7.65343	0.0197866	Uninfected_unique	200.427	202.24
chrX	119379002	119379177	88	0.26859	7.27803	0.00586157	Uninfected_unique	170.346	141.409
chrX	119553424	119553599	88	-0.08359	6.45403	0.0280493	Uninfected_unique	85.1677	90.2481
chrX	119602064	119602239	88	-0.10956	8.27318	0.010461	Uninfected_unique	297.841	321.341
chrX	119694365	119694553	94	0.33997	8.48464	9.85756e-05	Uninfected_unique	402.997	318.391
chrX	119886350	119886548	99	0.41694	7.86698	0.000135997	Uninfected_unique	269.745	202.042
chrX	120477400	120477610	105	0.31398	6.88476	0.0062627	Uninfected_unique	131.758	105.989
chrX	120589857	120590041	92	0.55637	7.41265	4.00986e-05	Uninfected_unique	206.62	140.504
chrX	120591095	120591347	126	0.63237	7.39218	7.22331e-06	Uninfected_unique	209.146	134.923
chrX	122967289	122967491	101	-0.06183	6.61569	0.0273269	Uninfected_unique	95.9875	100.191
chrX	123012101	123012329	114	-0.01363	6.76676	0.0269888	Uninfected_unique	108.379	109.408
chrX	123095070	123095257	94	0.17671	8.6852	0.00287303	Uninfected_unique	437.626	387.176
chrX	128890409	128890612	102	0.16738	7.26653	0.0134421	Uninfected_unique	163.169	145.295
chrX	128902669	128902956	144	0.62683	8.53311	3.9314e-10	Uninfected_unique	460.33	298.109
chrX	129087169	129087357	94	-0.10293	8.04685	0.0123322	Uninfected_unique	255.182	274.054
chrX	131121349	131121555	103	-0.09844	6.57479	0.0253744	Uninfected_unique	92.1281	98.6338
chrX	131625299	131625492	97	0.59876	6.40877	0.000725038	Uninfected_unique	104.557	69.0414
chrX	133941497	133941714	109	0.28864	7.81028	0.00199127	Uninfected_unique	248.069	203.088
chrX	134476804	134477016	106	-0.04404	7.17329	0.0224577	Uninfected_unique	142.15	146.556
chrX	135056490	135056707	109	0.16763	8.13571	0.00639654	Uninfected_unique	298.074	265.376
chrX	135849853	135850125	136	0.00826	7.0236	0.0247176	Uninfected_unique	130.484	129.739
chrX	135862976	135863173	99	0.21709	7.03365	0.0123974	Uninfected_unique	141.259	121.525
chrX	147462218	147462437	110	0.48096	7.56825	0.000116169	Uninfected_unique	224.214	160.649
chrX	147581988	147582198	105	0.18053	8.32618	0.00426034	Uninfected_unique	341.666	301.479
chrX	147619447	147619666	110	0.03237	7.58544	0.0199268	Uninfected_unique	194.23	189.921
chrX	148502497	148502710	107	-0.56592	7.22559	7.45845e-05	Uninfected_unique	123.01	182.095
chrX	148552506	148552702	98	0.11103	6.45422	0.0261999	Uninfected_unique	91.1225	84.3727
chrX	148607504	148607845	171	0.09072	8.48381	0.010634	Uninfected_unique	369.433	346.918
chrX	148609381	148609563	91	0.25529	6.53445	0.014721	Uninfected_unique	101.272	84.8478
chrX	149107188	149107401	107	0.19592	9.72151	0.000194963	Uninfected_unique	903.556	788.819
chrX	149107600	149107777	89	0.16006	9.80346	0.00057724	Uninfected_unique	944.554	845.365
chrX	149107824	149108016	96	0.27185	9.67321	7.08847e-06	Uninfected_unique	897.106	743.034
chrX	149533661	149533904	122	0.01574	7.18219	0.0232462	Uninfected_unique	146.024	144.439
chrX	149862665	149862853	94	0.25236	9.07353	0.00020408	Uninfected_unique	588.015	493.652
chrX	150068002	150068223	111	0.3229	8.54669	0.000132934	Uninfected_unique	418.226	334.356
chrX	152200965	152201207	121	0.27595	7.00161	0.00739031	Uninfected_unique	141.003	116.456
chrX	152558467	152558768	151	0.49126	8.03223	9.7675e-06	Uninfected_unique	310.373	220.801
chrX	152665609	152665849	120	-0.06602	7.09696	0.0225533	Uninfected_unique	133.801	140.067
chrX	152805010	152805197	94	0.19062	7.31344	0.0111996	Uninfected_unique	169.924	148.893
chrX	152820292	152820518	113	0.21569	7.05011	0.0115463	Uninfected_unique	142.81	122.979
chrX	152901792	152902045	127	-0.06908	7.48227	0.0192731	Uninfected_unique	174.578	183.141
chrX	152915212	152915392	90	-0.25031	7.12949	0.00783924	Uninfected_unique	128.385	152.709
chrX	152934552	152934990	219	-0.01532	7.77416	0.0189647	Uninfected_unique	217.746	220.07
chrX	152973920	152974154	117	-0.02584	7.01003	0.0246221	Uninfected_unique	127.744	130.052
chrX	153166329	153166549	110	0.61652	6.99297	7.35023e-05	Uninfected_unique	157.721	102.872
chrX	153191635	153191869	117	0.18416	9.48698	0.000554439	Uninfected_unique	764.864	673.204
chrX	153234299	153234508	105	0.27345	7.93477	0.00209573	Uninfected_unique	269.006	222.559
chrX	153249993	153250253	130	0.20019	7.76473	0.00681322	Uninfected_unique	233.103	202.901
chrX	153279151	153279346	98	-0.06581	7.26415	0.0210106	Uninfected_unique	150.252	157.265
chrX	153284597	153285092	248	0.06342	8.80645	0.0106609	Uninfected_unique	457.669	437.986
chrX	153402185	153402404	110	-0.23976	6.67215	0.0137886	Uninfected_unique	93.849	110.817
chrX	153526732	153527007	138	0.22836	6.8887	0.012116	Uninfected_unique	128.256	109.48
chrX	153536830	153537024	97	0.01128	6.82407	0.0263916	Uninfected_unique	113.749	112.863
chrX	153613263	153613438	88	-0.00961	7.66614	0.01969	Uninfected_unique	202.438	203.791
chrX	153627080	153627342	131	0.16472	8.79047	0.00309343	Uninfected_unique	468.8	418.218
chrX	153639533	153639935	201	0.14457	8.16237	0.00800485	Uninfected_unique	301.216	272.495
chrX	153639989	153640249	130	0.2393	8.34864	0.00167934	Uninfected_unique	354.168	300.036
chrX	153640925	153641138	107	0.21561	8.07134	0.00390586	Uninfected_unique	289.846	249.611
chrX	153672302	153672834	266	0.24492	7.96848	0.00283338	Uninfected_unique	272.656	230.084
chrX	153687502	153687699	99	0.18865	8.1215	0.00529189	Uninfected_unique	297.31	260.868
chrX	153714367	153714649	141	0.26965	8.35782	0.000923219	Uninfected_unique	360.198	298.791
chrX	153714910	153715202	146	0.27977	8.40162	0.000621351	Uninfected_unique	372.605	306.923
chrX	154055920	154056189	135	0.42264	6.60339	0.00336884	Uninfected_unique	112.572	83.9856
chrX	155258216	155258444	114	-0.50571	9.02079	1.47194e-09	Uninfected_unique	435.925	618.935
chr13	19097240	19097586	173	-0.3757	7.50864	0.00102623	Uninfected_unique	159.874	207.431
chr13	19218014	19218200	93	-0.23288	7.09225	0.0099782	Uninfected_unique	125.872	147.922
chr13	19254722	19254897	88	-0.20464	6.39416	0.0200646	Uninfected_unique	78.3488	90.2891
chr13	19320456	19320659	102	-0.48305	8.24118	3.28191e-06	Uninfected_unique	255.939	357.724
chr13	20531891	20532068	89	0.09946	10.2798	0.00180953	Uninfected_unique	1286.75	1201.03
chr13	20617398	20617754	178	-0.09303	7.61614	0.0162285	Uninfected_unique	189.97	202.623
chr13	20737596	20737828	116	0.13085	7.32754	0.0163997	Uninfected_unique	168.075	153.502
chr13	20756446	20756656	105	0.06403	7.06002	0.0232804	Uninfected_unique	136.432	130.509
chr13	21277646	21277897	126	0.28083	9.3167	2.75698e-05	Uninfected_unique	702.87	578.545
chr13	21286832	21287029	99	-0.28247	7.26581	0.00531499	Uninfected_unique	139.544	169.724
chr13	21685000	21685185	93	-0.19518	7.21023	0.0118093	Uninfected_unique	138.394	158.443
chr13	21834531	21834791	130	-0.4214	7.67107	0.000247558	Uninfected_unique	176.115	235.857
chr13	22032613	22032814	101	0.3959	8.80303	2.95056e-06	Uninfected_unique	512.348	389.392
chr13	22051242	22051483	121	0.03472	7.00004	0.0241461	Uninfected_unique	129.553	126.473
chr13	22244461	22244689	114	0.01786	8.81698	0.0130176	Uninfected_unique	453.799	448.216
chr13	22247899	22248137	119	-0.04186	7.94019	0.0171207	Uninfected_unique	242.067	249.193
chr13	22249536	22249765	115	0.1473	7.73895	0.0109608	Uninfected_unique	224.816	202.995
chr13	23952551	23952726	88	0.10507	7.16677	0.0197553	Uninfected_unique	149.014	138.547
chr13	23981119	23981301	91	0.24089	6.49419	0.0159484	Uninfected_unique	97.9949	82.9256
chr13	24152917	24153110	97	-0.19252	7.66888	0.0075639	Uninfected_unique	190.364	217.54
chr13	24381715	24382006	146	0.24909	7.47958	0.00552944	Uninfected_unique	194.567	163.714
chr13	24419996	24420207	106	0.19872	6.6982	0.0172808	Uninfected_unique	111.242	96.9279
chr13	24627664	24627860	98	-0.05615	6.7431	0.0262443	Uninfected_unique	105.057	109.226
chr13	25129288	25129467	90	-0.10383	6.47236	0.0270029	Uninfected_unique	85.6538	92.0455
chr13	25154583	25154762	90	-0.08456	6.60983	0.0259741	Uninfected_unique	94.8483	100.574
chr13	25258082	25258346	132	0.17758	7.05159	0.0151264	Uninfected_unique	141.081	124.742
chr13	25542599	25542807	104	0.23919	6.82339	0.0119731	Uninfected_unique	123.04	104.242
chr13	25592138	25592456	159	0.00344	7.70546	0.0195012	Uninfected_unique	208.974	208.476
chr13	25592499	25592793	147	0.01826	7.75891	0.0189632	Uninfected_unique	217.978	215.237
chr13	25611453	25611639	93	0.29373	6.53978	0.011136	Uninfected_unique	103.01	84.0348
chr13	26148631	26148861	115	0.29394	6.3966	0.0130786	Uninfected_unique	93.2848	76.0897
chr13	27745366	27745614	124	0.35305	9.01224	5.27852e-06	Uninfected_unique	583.571	456.894
chr13	27825328	27825831	252	0.43204	7.60328	0.000238619	Uninfected_unique	225.862	167.412
chr13	28021173	28021348	88	0.77462	6.45719	5.05992e-05	Uninfected_unique	114.921	67.1763
chr13	28404120	28404400	140	0.76201	6.4898	5.75407e-05	Uninfected_unique	117.036	69.0129
chr13	28630680	28630884	102	0.30331	6.81877	0.00827455	Uninfected_unique	125.403	101.625
chr13	29004126	29004347	111	0.70912	6.87236	2.36186e-05	Uninfected_unique	149.803	91.6333
chr13	29210954	29211157	102	0.4775	6.55074	0.00195561	Uninfected_unique	110.622	79.4508
chr13	29393989	29394202	107	0.2966	6.7597	0.00892219	Uninfected_unique	120.092	97.7754
chr13	30929539	30929777	119	0.6774	6.90685	3.41777e-05	Uninfected_unique	151.75	94.8877
chr13	30969044	30969276	116	0.63207	7.12587	2.7599e-05	Uninfected_unique	173.875	112.193
chr13	30969647	30969936	145	0.68987	7.03376	1.4587e-05	Uninfected_unique	166.421	103.166
chr13	30989899	30990082	92	0.31532	6.96224	0.00590555	Uninfected_unique	139.092	111.785
chr13	31003488	31003684	98	0.36818	6.22108	0.00985448	Uninfected_unique	84.7517	65.6621
chr13	31038329	31038504	88	0.65005	7.94426	6.78392e-08	Uninfected_unique	308.534	196.616
chr13	31040577	31040772	98	0.20954	8.92712	0.0010377	Uninfected_unique	523.443	452.681
chr13	31201884	31202071	94	0.68542	6.123	0.000733922	Uninfected_unique	88.3838	54.9592
chr13	31222110	31222317	104	0.20068	7.58823	0.00846728	Uninfected_unique	206.296	179.506
chr13	31253982	31254165	92	0.60706	6.27109	0.00123832	Uninfected_unique	95.3143	62.577
chr13	31311625	31311827	101	0.20725	7.14505	0.0117179	Uninfected_unique	152.079	131.729
chr13	31377102	31377307	103	0.01522	6.95565	0.0251049	Uninfected_unique	124.781	123.472
chr13	31618544	31618796	126	0.31648	6.99381	0.0054029	Uninfected_unique	142.227	114.212
chr13	31894812	31895039	114	0.47491	7.8354	4.20594e-05	Uninfected_unique	269.26	193.736
chr13	31895144	31895471	164	0.44876	8.10448	2.20259e-05	Uninfected_unique	321.541	235.584
chr13	32605366	32605545	90	0.17666	7.36232	0.0119881	Uninfected_unique	174.932	154.771
chr13	32890170	32890386	108	0.34429	8.60909	5.80548e-05	Uninfected_unique	439.962	346.556
chr13	33001213	33001649	218	0.37268	7.92836	0.000315202	Uninfected_unique	277.184	214.082
chr13	33001685	33001976	146	0.47885	7.99437	1.59029e-05	Uninfected_unique	301.037	216.009
chr13	33002439	33002663	112	0.37358	7.61379	0.000744917	Uninfected_unique	222.951	172.088
chr13	33161122	33161547	213	0.3395	8.6444	5.81589e-05	Uninfected_unique	450.115	355.733
chr13	33685092	33685379	144	0.63515	6.80065	0.000107566	Uninfected_unique	138.931	89.4541
chr13	34298002	34298273	136	0.51332	6.59607	0.00126646	Uninfected_unique	115.579	80.9753
chr13	34440185	34440421	118	0.35904	6.87004	0.00435655	Uninfected_unique	132.474	103.287
chr13	34566921	34567181	130	0.42941	6.60716	0.00336884	Uninfected_unique	113.132	84.008
chr13	36050410	36050649	120	0.55669	7.42305	4.14583e-05	Uninfected_unique	208.138	141.505
chr13	37394001	37394178	89	0.23575	8.62595	0.000987116	Uninfected_unique	428.7	364.071
chr13	40177190	40177454	132	0.33723	7.00535	0.00434932	Uninfected_unique	144.404	114.304
chr13	40517025	40517207	91	0.07942	6.55955	0.027135	Uninfected_unique	96.9561	91.763
chr13	40643401	40643605	102	0.49728	6.19937	0.00402333	Uninfected_unique	87.3061	61.8512
chr13	40780778	40781223	223	0.5166	7.57441	4.24643e-05	Uninfected_unique	227.972	159.356
chr13	40782716	40782996	140	0.84189	6.81207	2.16834e-06	Uninfected_unique	150.437	83.9306
chr13	40963313	40963538	113	0.11092	8.2514	0.0100764	Uninfected_unique	316.675	293.24
chr13	41013171	41013346	88	0.27187	7.19168	0.00614332	Uninfected_unique	160.632	133.043
chr13	41030653	41030894	121	0.04569	7.34419	0.0212805	Uninfected_unique	165.082	159.935
chr13	41038608	41038794	93	0.121	7.13945	0.0184025	Uninfected_unique	147.028	135.2
chr13	41099441	41099680	120	0.28757	6.90249	0.00777147	Uninfected_unique	132.172	108.286
chr13	41147187	41147466	140	0.18995	6.92955	0.0151256	Uninfected_unique	130.195	114.133
chr13	41170762	41170963	101	0.3143	7.35314	0.00342286	Uninfected_unique	182.315	146.625
chr13	41204284	41204496	106	-0.0718	7.43261	0.0195436	Uninfected_unique	168.512	177.111
chr13	41239743	41240225	241	0.13982	9.89558	0.00094614	Uninfected_unique	999.796	907.447
chr13	41535434	41535661	114	-0.33278	8.00983	0.000611435	Uninfected_unique	229.673	289.259
chr13	41553530	41553729	100	0.35913	8.30384	0.000117232	Uninfected_unique	357.898	279.03
chr13	41554707	41554894	94	0.38209	8.3733	4.10425e-05	Uninfected_unique	378.551	290.472
chr13	41560729	41560904	88	0.06288	9.30678	0.0084059	Uninfected_unique	647.268	619.663
chr13	41568250	41568460	105	0.19919	9.58555	0.000264562	Uninfected_unique	823.226	717.062
chr13	41580500	41580717	109	0.28799	9.12097	4.8268e-05	Uninfected_unique	615.223	503.893
chr13	41582007	41582193	93	0.20525	9.08939	0.00074466	Uninfected_unique	584.887	507.324
chr13	41586711	41586899	94	0.43889	8.16193	2.37078e-05	Uninfected_unique	333.461	245.995
chr13	41628454	41628676	111	0.25016	8.48274	0.00102404	Uninfected_unique	390.132	328.025
chr13	41796418	41796689	136	0.26305	7.92898	0.00227706	Uninfected_unique	266.965	222.468
chr13	41806029	41806229	100	0.10423	8.00637	0.0123835	Uninfected_unique	266.591	248.01
chr13	41985757	41985989	116	-0.19948	7.83139	0.00652735	Uninfected_unique	212.549	244.066
chr13	42033097	42033287	95	0.04998	9.48018	0.0084802	Uninfected_unique	726.677	701.933
chr13	42226177	42226356	90	0.12389	7.70767	0.0132464	Uninfected_unique	218.216	200.259
chr13	42479815	42480064	125	-0.08202	7.291	0.0198047	Uninfected_unique	152.217	161.122
chr13	42493466	42493650	92	0.26784	8.69468	0.000393127	Uninfected_unique	454.646	377.612
chr13	42516797	42517081	142	0.0383	7.09345	0.02373	Uninfected_unique	138.39	134.765
chr13	42684782	42685033	126	-0.1119	7.82129	0.0136258	Uninfected_unique	217.571	235.118
chr13	42790364	42790539	88	0.26853	7.24743	0.00576381	Uninfected_unique	166.768	138.445
chr13	42849311	42849538	114	0.00932	8.32974	0.0156658	Uninfected_unique	322.778	320.7
chr13	43267552	43267845	147	-0.11822	7.37803	0.0169614	Uninfected_unique	159.667	173.301
chr13	43543754	43543988	117	-0.22917	7.42842	0.00747664	Uninfected_unique	159.105	186.497
chr13	43544998	43545180	91	-0.27664	7.08214	0.00699383	Uninfected_unique	123.111	149.133
chr13	43619730	43619926	98	-0.47668	7.19106	0.00047093	Uninfected_unique	123.873	172.374
chr13	43629365	43629710	173	-0.19256	7.28185	0.0119067	Uninfected_unique	145.57	166.356
chr13	44817477	44817719	121	-0.20493	7.90839	0.00548299	Uninfected_unique	223.778	257.933
chr13	44833204	44833468	132	0.20197	8.31243	0.00322758	Uninfected_unique	340.95	296.409
chr13	45548662	45548890	114	0.17223	7.13627	0.0150962	Uninfected_unique	149.333	132.528
chr13	45621530	45621761	116	0.07127	7.56033	0.0184466	Uninfected_unique	193.47	184.145
chr13	45883615	45883839	112	0.01112	7.47465	0.021011	Uninfected_unique	178.553	177.182
chr13	45885265	45885488	112	-0.09878	7.84115	0.0145725	Uninfected_unique	221.592	237.295
chr13	45945129	45945364	118	-0.20946	7.28953	0.00969691	Uninfected_unique	145.492	168.226
chr13	46002429	46002631	101	-0.50718	8.13101	2.95376e-06	Uninfected_unique	235.147	334.207
chr13	46085751	46086000	125	-0.29669	8.35122	0.000510474	Uninfected_unique	294.653	361.93
chr13	46302998	46303186	94	0.00707	6.92261	0.0255135	Uninfected_unique	121.612	121.018
chr13	46739667	46739880	107	0.04131	7.33727	0.0213411	Uninfected_unique	164.042	159.412
chr13	46742569	46742744	88	-0.11854	7.61632	0.0145379	Uninfected_unique	188.321	204.448
chr13	46747910	46748105	98	0.37836	6.93362	0.00317858	Uninfected_unique	139.372	107.221
chr13	46869668	46869873	103	0.05913	7.33364	0.0205651	Uninfected_unique	164.644	158.032
chr13	46895846	46896051	103	-0.21139	7.17409	0.0109543	Uninfected_unique	134.214	155.394
chr13	46952666	46952876	105	0.24206	9.02292	0.000302255	Uninfected_unique	565.722	478.339
chr13	47011772	47011966	97	0.37938	7.83872	0.000376008	Uninfected_unique	261.091	200.719
chr13	47128771	47128982	106	0.08836	9.14136	0.00711696	Uninfected_unique	582.268	547.676
chr13	47140566	47140755	95	-0.03736	6.89214	0.0254019	Uninfected_unique	117.251	120.327
chr13	47160382	47160771	195	0.30865	7.91354	0.00124032	Uninfected_unique	268.33	216.649
chr13	47174273	47174602	165	0.25155	7.87488	0.00308914	Uninfected_unique	256.116	215.136
chr13	47183879	47184109	115	0.66683	6.97962	2.8914e-05	Uninfected_unique	159.017	100.163
chr13	47557099	47557301	101	-0.25709	8.13047	0.00182111	Uninfected_unique	256.342	306.345
chr13	48348353	48348533	90	0.22704	6.90689	0.0121673	Uninfected_unique	129.824	110.92
chr13	48701088	48701292	102	0.00138	6.92519	0.0255135	Uninfected_unique	121.59	121.474
chr13	48839488	48839680	96	0.18866	6.81506	0.0161433	Uninfected_unique	120.208	105.473
chr13	48861104	48861421	159	0.27483	7.42617	0.00443812	Uninfected_unique	189.176	156.363
chr13	49105065	49105250	93	0.03171	7.75607	0.0186169	Uninfected_unique	218.566	213.814
chr13	49148292	49148497	103	-0.18561	7.38553	0.0112947	Uninfected_unique	156.794	178.321
chr13	49306239	49306424	93	-0.16644	7.05614	0.0160268	Uninfected_unique	125.62	140.981
chr13	49814218	49814448	115	-0.00199	7.12249	0.0239055	Uninfected_unique	139.246	139.438
chr13	50019127	50019374	124	-0.08548	10.1951	0.0028992	Uninfected_unique	1138.1	1207.57
chr13	50104670	50104870	100	-0.24459	7.10938	0.00923853	Uninfected_unique	126.859	150.297
chr13	50336161	50336440	140	-0.45997	7.59586	0.0001483	Uninfected_unique	164.949	226.889
chr13	50550874	50551069	98	0.06986	7.10052	0.0219935	Uninfected_unique	140.6	133.954
chr13	50655252	50655517	133	-0.07507	9.21002	0.00772659	Uninfected_unique	577.023	607.843
chr13	51172495	51172728	117	0.06589	7.58865	0.0182948	Uninfected_unique	196.938	188.145
chr13	51186898	51187108	105	0.18888	6.80862	0.0161433	Uninfected_unique	119.682	104.995
chr13	51375528	51375775	124	0.12341	7.20734	0.0181797	Uninfected_unique	154.241	141.596
chr13	51489812	51490042	115	0.15457	7.24956	0.0142304	Uninfected_unique	160.546	144.235
chr13	51640256	51640431	88	-0.31483	7.07499	0.00514458	Uninfected_unique	120.892	150.373
chr13	51699980	51700226	123	0.02043	7.0465	0.0243455	Uninfected_unique	133.132	131.26
chr13	51837089	51837307	109	-0.03475	6.91652	0.0251985	Uninfected_unique	119.357	122.267
chr13	51860626	51860811	93	-0.05421	7.29757	0.0212462	Uninfected_unique	154.393	160.305
chr13	52187096	52187321	113	-0.20952	6.86973	0.0140855	Uninfected_unique	108.757	125.757
chr13	52219479	52219682	102	0.04115	7.23989	0.0223399	Uninfected_unique	153.327	149.015
chr13	52367776	52367976	100	0.34145	8.62102	6.03012e-05	Uninfected_unique	443.179	349.778
chr13	52403479	52403697	109	0.07578	8.59619	0.0110742	Uninfected_unique	397.299	376.968
chr13	52470522	52470757	118	-0.23084	7.24764	0.00821091	Uninfected_unique	140.285	164.627
chr13	52575361	52575562	101	-0.41603	7.05113	0.00164771	Uninfected_unique	114.811	153.186
chr13	52815018	52815207	95	-0.19309	6.88986	0.0151147	Uninfected_unique	110.915	126.799
chr13	53144127	53144374	124	0.09377	6.83902	0.0236728	Uninfected_unique	118.267	110.825
chr13	59965866	59966078	106	0.09611	7.08859	0.0208078	Uninfected_unique	140.716	131.647
chr13	62455037	62455212	88	-0.0673	6.62618	0.0272	Uninfected_unique	96.5049	101.113
chr13	64403816	64404032	108	-0.3038	7.05756	0.0056548	Uninfected_unique	119.898	148.001
chr13	66797151	66797373	111	0.38511	6.78767	0.00406174	Uninfected_unique	126.257	96.6779
chr13	67066675	67066899	112	0.2526	6.59559	0.0136381	Uninfected_unique	105.558	88.6034
chr13	67312067	67312246	90	-0.63738	6.99976	4.97715e-05	Uninfected_unique	102.613	159.615
chr13	70139655	70139880	113	0.10375	6.46606	0.0260927	Uninfected_unique	91.6419	85.2829
chr13	70431466	70431641	88	-0.09224	6.52929	0.026647	Uninfected_unique	89.46	95.3665
chr13	71865306	71865536	115	0.21282	7.19052	0.0109928	Uninfected_unique	157.251	135.684
chr13	72916347	72916531	92	-0.11627	7.44413	0.0161371	Uninfected_unique	167.265	181.304
chr13	73140090	73140311	111	-0.12998	7.47194	0.014761	Uninfected_unique	169.713	185.713
chr13	73426275	73426566	146	-0.68125	8.21006	1.16628e-09	Uninfected_unique	233.849	374.984
chr13	73983961	73984202	121	-0.43612	8.11049	3.51436e-05	Uninfected_unique	237.606	321.472
chr13	74339760	74339991	116	-0.02072	8.4725	0.014696	Uninfected_unique	352.661	357.763
chr13	74409381	74409764	192	-0.393	8.02493	0.000142297	Uninfected_unique	227.296	298.467
chr13	74488366	74488567	101	-0.31803	7.77756	0.00140079	Uninfected_unique	196.522	244.989
chr13	74541559	74541763	102	-0.43796	10.1883	1.6353e-14	Uninfected_unique	1002.45	1358
chr13	74547381	74547577	98	-0.0261	8.03366	0.0171561	Uninfected_unique	259.683	264.424
chr13	74644318	74644555	119	-0.07371	8.07133	0.0143333	Uninfected_unique	262.191	275.935
chr13	74862861	74863065	102	-0.04337	8.9843	0.0112154	Uninfected_unique	498.903	514.128
chr13	74919279	74919454	88	-0.43287	7.8933	9.5564e-05	Uninfected_unique	204.629	276.232
chr13	74987663	74987888	113	-0.61345	8.27596	1.57632e-08	Uninfected_unique	250.599	383.394
chr13	75194930	75195150	110	-0.27992	8.03663	0.00147378	Uninfected_unique	238.306	289.334
chr13	75282710	75282917	104	-0.45328	7.99894	3.59006e-05	Uninfected_unique	218.623	299.327
chr13	75292470	75292689	110	-0.53532	8.39543	1.61888e-07	Uninfected_unique	279.707	405.368
chr13	75946615	75946845	115	0.05285	8.13075	0.0154139	Uninfected_unique	285.466	275.198
chr13	75969285	75969489	102	0.13173	7.75551	0.012085	Uninfected_unique	226.187	206.449
chr13	75998216	75998394	89	-0.1096	8.1775	0.0109162	Uninfected_unique	278.725	300.725
chr13	76006919	76007154	118	0.09779	8.15574	0.0121711	Uninfected_unique	295.013	275.679
chr13	76270064	76270253	95	-0.28004	8.46538	0.000576431	Uninfected_unique	320.762	389.479
chr13	76334376	76334599	112	-0.23128	8.5872	0.00119114	Uninfected_unique	354.972	416.693
chr13	76450584	76450807	112	-0.45405	8.31392	6.54725e-06	Uninfected_unique	271.893	372.461
chr13	76764147	76764363	108	-0.30718	8.35598	0.00041881	Uninfected_unique	294.554	364.448
chr13	76888751	76888985	117	-0.1718	7.91521	0.00760625	Uninfected_unique	227.435	256.197
chr13	77472210	77472449	120	-0.58726	8.0075	4.55498e-07	Uninfected_unique	209.945	315.42
chr13	77566949	77567134	93	-0.30966	11.0193	2.40317e-13	Uninfected_unique	1864.34	2310.69
chr13	77874812	77875139	164	-0.21308	7.98559	0.0042772	Uninfected_unique	235.413	272.881
chr13	78003534	78003741	104	-0.17677	8.03303	0.006565	Uninfected_unique	246.364	278.477
chr13	78077667	78077952	143	-0.4163	8.10733	5.40408e-05	Uninfected_unique	238.721	318.573
chr13	78325876	78326284	204	-0.28624	8.24023	0.000837659	Uninfected_unique	273.825	333.918
chr13	78353671	78353871	100	-0.21859	8.32959	0.00244406	Uninfected_unique	298.233	347.022
chr13	78815541	78815716	88	-0.5121	7.49114	7.63686e-05	Uninfected_unique	150.653	214.851
chr13	79232410	79232620	105	-0.16692	9.75029	0.000529976	Uninfected_unique	812.841	912.544
chr13	79234307	79234483	88	-0.08831	8.31332	0.0119065	Uninfected_unique	308.508	327.982
chr13	79450066	79450345	140	-0.5795	8.68924	8.22096e-10	Uninfected_unique	337.675	504.598
chr13	79644780	79645003	112	-0.01623	7.95444	0.0178321	Uninfected_unique	246.651	249.441
chr13	79881878	79882096	109	-0.41982	8.0645	5.30623e-05	Uninfected_unique	231.455	309.632
chr13	79956800	79957020	110	0.09342	7.70171	0.0159505	Uninfected_unique	215.034	201.551
chr13	79975887	79976113	113	0.11435	8.25851	0.00968064	Uninfected_unique	318.618	294.339
chr13	79998105	79998503	199	-0.28335	7.85608	0.00190978	Uninfected_unique	210.023	255.602
chr13	80115659	80115854	98	-0.26349	7.42089	0.00486263	Uninfected_unique	156.405	187.746
chr13	80253487	80253687	100	-0.5025	7.94884	1.10083e-05	Uninfected_unique	207.59	294.085
chr13	80917021	80917250	115	-0.49204	8.24257	2.34031e-06	Uninfected_unique	255.389	359.187
chr13	81253968	81254184	108	-0.56023	7.59696	1.28147e-05	Uninfected_unique	159.437	235.091
chr13	81281713	81282000	144	-0.92602	8.68484	7.00015e-21	Uninfected_unique	298.55	567.254
chr13	81498059	81498234	88	-0.61579	7.51882	4.81192e-06	Uninfected_unique	148.151	227.026
chr13	81591771	81591982	106	-0.15359	7.71728	0.0109502	Uninfected_unique	199.533	221.948
chr13	81684915	81685090	88	-0.49319	7.33482	0.000183108	Uninfected_unique	136.072	191.528
chr13	81711866	81712074	104	-0.47144	7.82533	4.77219e-05	Uninfected_unique	192.62	267.066
chr13	81738442	81738686	122	-0.47903	8.04853	1.0566e-05	Uninfected_unique	224.258	312.572
chr13	81745274	81745489	108	-0.25853	7.2707	0.00640815	Uninfected_unique	141.184	168.893
chr13	82832407	82832667	130	-0.49584	8.32532	1.17603e-06	Uninfected_unique	270.109	380.892
chr13	82904753	82904948	98	-0.29038	7.91208	0.00167885	Uninfected_unique	217.805	266.367
chr13	83278444	83278672	114	-0.09818	7.58783	0.0163233	Uninfected_unique	185.946	199.041
chr13	83314608	83314783	88	-0.63379	7.92096	1.66409e-07	Uninfected_unique	194.559	301.885
chr13	83344340	83344586	123	-0.33907	7.4829	0.00181543	Uninfected_unique	159.053	201.193
chr13	83402925	83403123	99	-0.82935	7.71011	6.10671e-10	Uninfected_unique	157.089	279.128
chr13	84027481	84027656	88	-0.48502	8.36525	1.50081e-06	Uninfected_unique	278.733	390.116
chr13	84354444	84354619	88	-0.39784	7.84952	0.000226938	Uninfected_unique	200.937	264.741
chr13	85444420	85444595	88	-0.5498	7.7734	6.72698e-06	Uninfected_unique	180.831	264.716
chr13	85501851	85502059	104	-0.38215	8.06832	0.000161684	Uninfected_unique	235.119	306.426
chr13	85779653	85779856	102	-0.79154	8.36504	2.83672e-13	Uninfected_unique	250.605	433.777
chr13	86380801	86380997	98	-0.25369	7.61109	0.00461805	Uninfected_unique	179.053	213.477
chr13	89274873	89275095	111	-0.63861	7.46402	4.50058e-06	Uninfected_unique	141.506	220.3
chr13	89548739	89549009	135	-0.5101	8.12938	2.95376e-06	Uninfected_unique	234.644	334.168
chr13	90144458	90144660	101	-0.49243	8.10947	5.27634e-06	Uninfected_unique	232.85	327.576
chr13	90535995	90536205	105	-0.57195	8.18961	1.56125e-07	Uninfected_unique	239.459	355.963
chr13	91519427	91519606	90	-0.47663	8.28063	3.46176e-06	Uninfected_unique	263.62	366.824
chr13	91620867	91621042	88	-0.30204	7.52849	0.0026696	Uninfected_unique	166.28	205.004
chr13	91964609	91964889	140	-0.30411	8.01797	0.000958458	Uninfected_unique	233.279	288.02
chr13	91972217	91972394	89	-0.41049	7.91381	0.000135297	Uninfected_unique	209.175	278.022
chr13	92018672	92018981	155	-0.53527	8.54268	4.06496e-08	Uninfected_unique	309.768	448.92
chr13	92665116	92665347	116	-0.43937	7.40903	0.000420616	Uninfected_unique	145.951	197.912
chr13	92839686	92839935	125	-0.18296	7.88257	0.00708363	Uninfected_unique	221.489	251.436
chr13	93821638	93821832	97	-0.47239	7.66126	9.61213e-05	Uninfected_unique	171.857	238.435
chr13	94844908	94845133	113	-0.47794	7.8574	3.34396e-05	Uninfected_unique	196.506	273.685
chr13	95004382	95004570	94	-0.53014	8.19351	8.85329e-07	Uninfected_unique	243.612	351.792
chr13	95068851	95069026	88	-0.25215	7.71465	0.0038297	Uninfected_unique	192.481	229.242
chr13	95087927	95088165	119	-0.19473	7.52679	0.00891294	Uninfected_unique	172.377	197.287
chr13	95179314	95179511	99	-0.63198	8.04107	6.1854e-08	Uninfected_unique	211.583	327.888
chr13	95188519	95188758	120	-0.6981	7.90973	1.59787e-08	Uninfected_unique	188.795	306.295
chr13	95327260	95327473	107	-0.40118	7.7523	0.00030648	Uninfected_unique	187.625	247.776
chr13	95555086	95555271	93	-0.43399	7.34515	0.000570452	Uninfected_unique	139.891	188.987
chr13	95841418	95841867	225	-0.20592	8.64574	0.00186286	Uninfected_unique	372.935	430.151
chr13	95860381	95860561	90	-0.2638	8.03516	0.0019478	Uninfected_unique	239.397	287.429
chr13	95934141	95934350	105	-0.50144	8.55105	1.75925e-07	Uninfected_unique	315.245	446.269
chr13	95948888	95949082	97	-0.38749	8.4313	3.02291e-05	Uninfected_unique	301.822	394.818
chr13	96056611	96056811	100	-0.34615	8.73079	3.10539e-05	Uninfected_unique	376.816	478.994
chr13	96672337	96672656	160	-0.54537	8.23403	3.17773e-07	Uninfected_unique	249.232	363.728
chr13	96942750	96942925	88	-0.26844	7.89888	0.00220333	Uninfected_unique	217.468	261.941
chr13	97670378	97670578	100	-0.21753	7.72102	0.00579802	Uninfected_unique	195.667	227.51
chr13	97875970	97876222	126	-0.18895	8.82972	0.00183635	Uninfected_unique	426.158	485.792
chr13	97943530	97943722	96	-0.60523	8.19021	4.78255e-08	Uninfected_unique	236.811	360.243
chr13	99098103	99098335	116	-0.48846	9.80066	8.04819e-14	Uninfected_unique	752.96	1056.36
chr13	99134802	99135015	107	-0.60121	8.58563	8.73457e-10	Uninfected_unique	311.918	473.177
chr13	99215486	99215685	100	-0.38462	8.19917	8.43179e-05	Uninfected_unique	257.22	335.805
chr13	99218630	99218812	91	-0.44928	8.99516	5.80024e-08	Uninfected_unique	436.706	596.261
chr13	99220181	99220406	113	-0.31716	9.04004	2.13157e-05	Uninfected_unique	471.613	587.571
chr13	99325437	99325634	99	-0.47797	8.50354	8.04655e-07	Uninfected_unique	307.524	428.314
chr13	99425480	99425708	114	-0.74105	8.67263	2.90824e-14	Uninfected_unique	315.633	527.547
chr13	99477889	99478236	174	-0.19048	8.20177	0.00453547	Uninfected_unique	275.619	314.52
chr13	99532318	99532575	129	-0.26212	8.21665	0.0014251	Uninfected_unique	271.647	325.77
chr13	99582496	99582718	111	-0.3142	8.2224	0.000483415	Uninfected_unique	267.853	333.028
chr13	99628333	99628566	117	-0.34181	8.33883	0.000185576	Uninfected_unique	287.601	364.49
chr13	99698577	99699002	213	-0.3316	8.7812	3.75332e-05	Uninfected_unique	392.188	493.532
chr13	99704363	99704573	105	-0.13805	8.97789	0.00401414	Uninfected_unique	480.657	528.923
chr13	99890668	99890882	107	-0.06285	8.0664	0.0150623	Uninfected_unique	262.282	273.961
chr13	99908919	99909178	130	-0.04678	8.35733	0.0144291	Uninfected_unique	322.675	333.31
chr13	99916407	99916582	88	-0.24721	8.29587	0.00157163	Uninfected_unique	288.467	342.385
chr13	99921963	99922157	97	-0.15357	8.07803	0.00788881	Uninfected_unique	256.221	284.999
chr13	99978371	99978636	133	-0.06361	8.42901	0.0129071	Uninfected_unique	337.14	352.338
chr13	99987880	99988152	136	-0.17002	7.68476	0.00977639	Uninfected_unique	193.978	218.24
chr13	100077975	100078197	111	-0.35166	9.14252	2.71096e-06	Uninfected_unique	500.314	638.415
chr13	100084248	100084431	92	-0.50856	9.03991	8.97617e-10	Uninfected_unique	441.304	627.813
chr13	100252622	100252825	102	-0.41193	8.29983	2.6825e-05	Uninfected_unique	273.21	363.496
chr13	100308433	100308638	103	-0.42795	8.52407	4.21921e-06	Uninfected_unique	317.386	426.986
chr13	100552697	100553004	154	-0.3807	8.48333	3.23701e-05	Uninfected_unique	313.643	408.355
chr13	100568815	100569028	107	-0.78178	8.63047	2.83993e-15	Uninfected_unique	302.246	519.637
chr13	100989115	100989352	119	-0.42405	8.11955	4.19932e-05	Uninfected_unique	240.106	322.147
chr13	101167150	101167406	128	-0.11112	8.0285	0.0119055	Uninfected_unique	251.243	271.359
chr13	101225343	101225598	128	-0.40584	8.05514	9.07722e-05	Uninfected_unique	231.075	306.143
chr13	101310683	101310944	131	-0.30363	8.12425	0.000756407	Uninfected_unique	251.155	309.987
chr13	101374214	101374446	116	-0.24614	8.23951	0.00190151	Uninfected_unique	277.518	329.145
chr13	101932682	101932874	96	-0.43669	7.79102	0.000107183	Uninfected_unique	190.372	257.667
chr13	102206760	102206979	110	-0.41461	7.75077	0.000231398	Uninfected_unique	186.556	248.668
chr13	103109768	103110012	122	0.14023	6.56351	0.0234152	Uninfected_unique	99.2933	90.0962
chr13	103452626	103452812	93	0.08492	6.77041	0.024859	Uninfected_unique	112.429	106.002
chr13	103623008	103623222	107	0.46076	6.51561	0.0030262	Uninfected_unique	107.336	77.9907
chr13	103686513	103686688	88	0.44419	6.60725	0.00292557	Uninfected_unique	113.72	83.584
chr13	107025787	107025999	106	0.5061	6.40514	0.00222397	Uninfected_unique	100.999	71.1154
chr13	107188823	107189054	116	0.09273	9.01237	0.00732856	Uninfected_unique	533.275	500.077
chr13	107572034	107572259	113	0.1061	7.50279	0.0165889	Uninfected_unique	188.163	174.822
chr13	110437058	110437286	114	-0.05121	7.53511	0.0193788	Uninfected_unique	182.216	188.8
chr13	111064662	111064867	103	-0.12921	7.35524	0.0163395	Uninfected_unique	156.567	171.236
chr13	111245886	111246072	93	-0.38229	6.8543	0.00332932	Uninfected_unique	101.347	132.096
chr13	111268691	111268866	88	0.1114	8.86189	0.00652197	Uninfected_unique	483.573	447.638
chr13	111295698	111295924	113	-0.38066	7.87304	0.000311817	Uninfected_unique	205.459	267.495
chr13	111333235	111333423	94	0.22679	7.34791	0.0084944	Uninfected_unique	176.229	150.593
chr13	111471884	111472136	126	-0.01459	7.2652	0.0225669	Uninfected_unique	153.055	154.611
chr13	111577638	111577864	113	-0.24237	7.07263	0.00992157	Uninfected_unique	123.764	146.404
chr13	111814360	111814540	90	-0.11954	7.32246	0.0171128	Uninfected_unique	153.563	166.829
chr13	111819330	111819592	131	0.04936	7.53624	0.0193788	Uninfected_unique	188.827	182.476
chr13	111838384	111838571	94	-0.02478	8.86944	0.0125987	Uninfected_unique	463.701	471.734
chr13	111854438	111854677	120	0.11288	7.74503	0.0137546	Uninfected_unique	223.088	206.299
chr13	111875841	111876017	88	0.02344	6.9027	0.0255122	Uninfected_unique	120.628	118.684
chr13	112048386	112048566	90	-0.47155	7.39839	0.000218436	Uninfected_unique	143.272	198.661
chr13	112790658	112790833	88	-0.33109	7.20051	0.00329498	Uninfected_unique	131.14	164.969
chr13	112863949	112864124	88	-0.44069	7.60014	0.000238619	Uninfected_unique	166.548	226.048
chr13	113098391	113098571	90	-0.1308	7.82334	0.0115244	Uninfected_unique	216.458	236.999
chr13	113142925	113143211	143	-0.30867	7.49621	0.00257959	Uninfected_unique	162.228	200.929
chr13	113295172	113295347	88	-0.38292	6.98965	0.00261073	Uninfected_unique	111.291	145.121
chr13	113369605	113369821	108	-0.44081	7.76268	0.000113605	Uninfected_unique	186.402	253.016
chr13	113808204	113808398	97	-0.01339	8.47875	0.0148414	Uninfected_unique	355.093	358.405
chr13	113808659	113808858	100	-0.10559	8.34755	0.010047	Uninfected_unique	314.029	337.875
chr13	114030150	114030341	96	-0.25865	7.62534	0.00428572	Uninfected_unique	180.52	215.967
chr13	114086411	114086758	174	0.0415	8.52437	0.013534	Uninfected_unique	373.54	362.948
chr13	114105298	114105517	110	-0.13438	8.35189	0.00784297	Uninfected_unique	311.848	342.291
chr13	114216844	114217019	88	-0.68224	7.83355	5.31618e-08	Uninfected_unique	180.072	288.949
chr13	114518449	114518657	104	-0.32794	8.69575	6.17537e-05	Uninfected_unique	370.102	464.56
chr13	114816653	114816857	102	-0.06952	7.67192	0.0174669	Uninfected_unique	199.074	208.902
chr13	114894554	114894741	94	-0.16426	7.71134	0.00981232	Uninfected_unique	197.98	221.855
chr13	114898033	114898225	96	-0.7789	8.24849	4.03319e-12	Uninfected_unique	232.17	398.363
chr13	114930546	114930773	114	-0.0558	7.27425	0.0213669	Uninfected_unique	151.834	157.822
chr13	114992308	114992569	131	-0.19208	7.8446	0.00655843	Uninfected_unique	215.055	245.681
chr13	115029089	115029401	156	0.27303	7.52354	0.00395453	Uninfected_unique	202.258	167.385
chr13	115080591	115080771	90	0.16269	9.02037	0.00245591	Uninfected_unique	549.401	490.811
chr13	115099503	115099722	110	0.40732	8.3085	2.78345e-05	Uninfected_unique	365.103	275.296
chr13	115105319	115105553	117	-0.17552	7.55941	0.0101947	Uninfected_unique	177.497	200.46
chr12	176178	176416	119	-0.53747	7.84051	6.42342e-06	Uninfected_unique	190.253	276.138
chr12	529578	529753	88	0.30479	6.85988	0.00763257	Uninfected_unique	129.094	104.509
chr12	568990	569386	198	-0.31592	8.24867	0.000458466	Uninfected_unique	272.613	339.35
chr12	569544	569729	93	-0.21525	8.2979	0.00276082	Uninfected_unique	292.091	339.09
chr12	656178	656372	97	-0.12089	7.93476	0.011985	Uninfected_unique	234.642	255.151
chr12	783491	783921	215	0.05229	8.32708	0.0140715	Uninfected_unique	327.018	315.377
chr12	863111	863298	94	0.28567	8.90999	0.000120305	Uninfected_unique	531.095	435.689
chr12	1024426	1024615	95	-0.05196	7.26276	0.0218454	Uninfected_unique	150.83	156.361
chr12	1194367	1194543	88	-0.15013	7.32676	0.0142016	Uninfected_unique	152.397	169.111
chr12	1217522	1217744	111	0.14364	6.7163	0.0206187	Uninfected_unique	110.517	100.043
chr12	1626393	1626575	91	0.07494	7.07682	0.022126	Uninfected_unique	138.553	131.539
chr12	1654854	1655045	96	0.15735	7.50622	0.0120774	Uninfected_unique	191.991	172.153
chr12	1656275	1656817	271	0.33493	7.82872	0.000862826	Uninfected_unique	255.324	202.427
chr12	1692723	1692929	103	0.25587	6.97837	0.00883192	Uninfected_unique	137.788	115.395
chr12	1714461	1714866	203	0.23244	7.87803	0.00398177	Uninfected_unique	254.982	217.039
chr12	1739277	1739538	131	-0.45874	8.11196	1.64713e-05	Uninfected_unique	235.991	324.333
chr12	1762093	1762308	108	0.12674	7.23901	0.0173411	Uninfected_unique	157.847	144.572
chr12	1900369	1900553	92	0.24221	7.60725	0.0050186	Uninfected_unique	212.064	179.289
chr12	1913732	1913952	110	-0.28583	7.94513	0.0015868	Uninfected_unique	223.203	272.11
chr12	2016756	2017035	140	-0.42835	7.65785	0.000238277	Uninfected_unique	174.088	234.269
chr12	2049274	2049449	88	0.00138	6.92519	0.0255135	Uninfected_unique	121.59	121.474
chr12	2166456	2166654	99	0.0056	7.32637	0.0222149	Uninfected_unique	160.805	160.182
chr12	2406941	2407118	89	-0.02644	7.42492	0.0212454	Uninfected_unique	170.272	173.422
chr12	2800921	2801112	96	-0.11094	7.50957	0.0159745	Uninfected_unique	175.351	189.367
chr12	2841273	2841448	88	0.03846	7.09876	0.0233886	Uninfected_unique	138.908	135.254
chr12	2893241	2893440	100	0.14283	7.20809	0.0166549	Uninfected_unique	155.364	140.719
chr12	2922830	2923027	99	0.10729	8.87732	0.00678502	Uninfected_unique	488.077	453.097
chr12	2985692	2985919	114	0.21796	8.88513	0.00084152	Uninfected_unique	509.914	438.414
chr12	3143421	3143628	104	-0.05364	7.58302	0.0191125	Uninfected_unique	188.21	195.34
chr12	3150793	3150988	98	-0.09068	8.20562	0.0120919	Uninfected_unique	286.081	304.64
chr12	3151666	3151928	131	0.16541	8.17117	0.00646827	Uninfected_unique	305.256	272.189
chr12	3204753	3205046	147	-0.41946	7.61194	0.000326996	Uninfected_unique	169.156	226.234
chr12	3244666	3244907	121	-0.09325	7.69346	0.0154729	Uninfected_unique	200.413	213.795
chr12	3317110	3317285	88	-0.13321	7.66435	0.013288	Uninfected_unique	193.709	212.446
chr12	3409136	3409400	132	-0.07801	8.39667	0.012083	Uninfected_unique	328.026	346.251
chr12	3409701	3409928	114	0.00013	8.35076	0.0156178	Uninfected_unique	326.474	326.445
chr12	3992445	3992620	88	0.31262	6.59011	0.00918304	Uninfected_unique	107.368	86.4504
chr12	4216660	4216847	94	-0.2826	7.12075	0.00647863	Uninfected_unique	126.19	153.495
chr12	4262695	4262902	104	-0.06441	7.16679	0.0220691	Uninfected_unique	140.515	146.931
chr12	4381048	4381384	168	0.02914	8.39493	0.0148236	Uninfected_unique	340.026	333.227
chr12	4386163	4386413	125	-0.10892	7.53728	0.0158934	Uninfected_unique	178.876	192.904
chr12	4964638	4964902	132	-0.05327	7.59809	0.0190261	Uninfected_unique	190.211	197.365
chr12	4966970	4967190	110	-0.0359	7.52816	0.0200646	Uninfected_unique	182.305	186.898
chr12	5309787	5310003	108	-0.01867	7.10305	0.0239918	Uninfected_unique	136.591	138.37
chr12	5587324	5587749	213	0.19923	7.54627	0.00836424	Uninfected_unique	200.281	174.448
chr12	5620766	5621053	144	-0.05352	7.47104	0.0197515	Uninfected_unique	174.161	180.744
chr12	6075129	6075336	104	-0.37081	7.49731	0.00114249	Uninfected_unique	158.892	205.46
chr12	6149103	6149424	161	-0.20179	7.61929	0.00743926	Uninfected_unique	183.342	210.866
chr12	6319600	6319781	91	-0.03537	7.55543	0.0201285	Uninfected_unique	185.818	190.43
chr12	6394262	6394449	94	0.17641	7.31989	0.0119463	Uninfected_unique	169.847	150.298
chr12	6439452	6439678	113	-0.28829	7.88499	0.00179046	Uninfected_unique	213.908	261.222
chr12	6472452	6472693	121	0.11507	8.11218	0.0109532	Uninfected_unique	287.958	265.882
chr12	6532785	6533036	126	0.11895	8.08852	0.0105212	Uninfected_unique	283.655	261.206
chr12	6542280	6542473	97	-0.02453	8.47039	0.0145926	Uninfected_unique	351.681	357.712
chr12	6552042	6552265	112	0.14629	8.67437	0.00474782	Uninfected_unique	429.798	388.353
chr12	6553970	6554180	105	0.11406	8.7849	0.00671146	Uninfected_unique	458.866	423.985
chr12	6641782	6642007	113	0.19013	9.00076	0.00139998	Uninfected_unique	547.162	479.602
chr12	6644136	6644445	155	-0.10095	10.1793	0.00201527	Uninfected_unique	1119.64	1200.79
chr12	6649466	6649703	119	-0.02899	8.33221	0.0151179	Uninfected_unique	319.067	325.543
chr12	6672718	6672898	90	-0.1035	7.62468	0.0150983	Uninfected_unique	190.405	204.567
chr12	6679539	6679721	91	-0.04806	7.73908	0.0182213	Uninfected_unique	210.117	217.235
chr12	6716299	6716836	269	0.11943	9.28011	0.00397943	Uninfected_unique	647.989	596.507
chr12	6726969	6727169	100	0.00632	7.36651	0.0219444	Uninfected_unique	165.383	164.66
chr12	6736838	6737045	104	0.10765	7.91797	0.0129768	Uninfected_unique	251.044	232.993
chr12	6744623	6744820	99	0.28138	8.5329	0.000448356	Uninfected_unique	408.329	335.975
chr12	6745107	6745305	99	0.28963	8.52585	0.000328759	Uninfected_unique	407.502	333.383
chr12	6753448	6753651	102	0.25211	7.89922	0.00290197	Uninfected_unique	260.524	218.754
chr12	6756511	6756711	100	-0.2805	7.89785	0.00181796	Uninfected_unique	216.406	262.851
chr12	6833695	6833888	97	0.11792	9.73196	0.00229297	Uninfected_unique	885.851	816.325
chr12	6934871	6935070	100	-0.13701	8.13935	0.00880857	Uninfected_unique	268.885	295.672
chr12	6938533	6938722	95	-0.24881	8.16932	0.00190983	Uninfected_unique	264.095	313.805
chr12	6944913	6945130	109	0.02918	7.84849	0.0180748	Uninfected_unique	232.821	228.16
chr12	7023871	7024100	115	-0.38344	8.23569	8.32081e-05	Uninfected_unique	263.922	344.273
chr12	7052622	7052846	112	-0.06504	9.17614	0.00875584	Uninfected_unique	565.593	591.675
chr12	7060369	7060572	102	0.07358	8.46755	0.0119261	Uninfected_unique	363.129	345.074
chr12	7074281	7074551	135	-0.11294	8.30662	0.00968092	Uninfected_unique	304.469	329.262
chr12	7261839	7262014	88	-0.10803	8.56303	0.00832215	Uninfected_unique	364.308	392.635
chr12	7283783	7283986	102	0.11956	8.81944	0.00597212	Uninfected_unique	470.881	433.431
chr12	7294769	7294959	95	-0.01788	7.74223	0.0191827	Uninfected_unique	212.791	215.444
chr12	7341190	7341403	107	0.05936	8.84537	0.0108052	Uninfected_unique	469.522	450.596
chr12	7372404	7372579	88	-0.05325	6.86004	0.0252805	Uninfected_unique	114.041	118.329
chr12	7791325	7791598	137	-0.06716	7.62692	0.0181099	Uninfected_unique	193.118	202.321
chr12	7984792	7985045	127	-0.09879	7.25935	0.0186922	Uninfected_unique	148.051	158.545
chr12	8394815	8395033	109	0.07062	9.70565	0.00590227	Uninfected_unique	855.699	814.821
chr12	8542989	8543409	210	-0.11758	8.213	0.0100824	Uninfected_unique	284.88	309.07
chr12	8696921	8697171	125	0.16156	7.2185	0.0142369	Uninfected_unique	157.508	140.821
chr12	8732136	8732311	88	0.23737	7.0507	0.00986248	Uninfected_unique	143.946	122.108
chr12	8743791	8743996	103	0.3862	6.78112	0.00353353	Uninfected_unique	125.733	96.2037
chr12	8761754	8762062	154	0.20375	7.95855	0.00523838	Uninfected_unique	266.95	231.79
chr12	8801215	8801412	99	0.12427	7.00496	0.019663	Uninfected_unique	134.093	123.026
chr12	8840517	8840706	95	0.41698	7.07402	0.00148911	Uninfected_unique	155.688	116.609
chr12	9569089	9569264	88	-0.56626	8.13402	3.39668e-07	Uninfected_unique	230.862	341.834
chr12	9600091	9600285	97	0.09304	9.4038	0.00530697	Uninfected_unique	699.568	655.876
chr12	9621677	9621940	132	-0.12836	7.58201	0.0139813	Uninfected_unique	183.27	200.324
chr12	9663301	9663524	112	0.37392	7.2431	0.0018885	Uninfected_unique	172.453	133.079
chr12	9769795	9769998	102	0.16014	7.16644	0.0150795	Uninfected_unique	151.851	135.897
chr12	9786896	9787259	182	0.0057	6.98391	0.0250072	Uninfected_unique	126.831	126.331
chr12	9802224	9802473	125	0.06895	8.41243	0.0126608	Uninfected_unique	348.957	332.672
chr12	9827796	9828044	124	0.56366	7.70244	6.75793e-06	Uninfected_unique	253.224	171.327
chr12	9854371	9854642	136	0.25388	7.31464	0.00656099	Uninfected_unique	173.836	145.785
chr12	9860844	9861065	111	0.03431	7.51989	0.0201154	Uninfected_unique	185.728	181.363
chr12	9865627	9865802	88	0.19814	7.32721	0.0104956	Uninfected_unique	172.002	149.929
chr12	9865938	9866196	129	0.23269	7.26812	0.00826625	Uninfected_unique	167.088	142.2
chr12	9883280	9883493	107	0.51227	7.54433	5.40327e-05	Uninfected_unique	222.933	156.302
chr12	9884457	9884717	130	0.51648	7.61497	4.16994e-05	Uninfected_unique	234.462	163.907
chr12	9893048	9893254	103	-0.02324	7.27873	0.0222801	Uninfected_unique	154.035	156.536
chr12	9895335	9895549	107	0.19799	7.79593	0.00643014	Uninfected_unique	238.018	207.495
chr12	9903375	9903652	139	0.71067	6.99701	1.24226e-05	Uninfected_unique	163.409	99.8489
chr12	10022388	10022577	95	0.59453	7.00771	0.000115951	Uninfected_unique	158.131	104.724
chr12	10366329	10366524	98	0.01757	8.69338	0.0136606	Uninfected_unique	416.498	411.456
chr12	10388471	10388646	88	0.19214	7.51288	0.00950214	Uninfected_unique	195.219	170.876
chr12	10399617	10399867	125	0.58583	7.56182	8.91293e-06	Uninfected_unique	231.479	154.226
chr12	10494594	10494773	90	0.02172	6.72222	0.0273672	Uninfected_unique	106.38	104.79
chr12	10517855	10518082	114	0.31182	8.67471	0.000124793	Uninfected_unique	455.283	366.787
chr12	10547171	10547363	96	0.23574	8.47708	0.00130827	Uninfected_unique	386.668	328.377
chr12	10547577	10547822	123	0.22986	8.79024	0.00084814	Uninfected_unique	479.428	408.817
chr12	10550011	10550189	89	0.46606	7.41785	0.000229084	Uninfected_unique	200.976	145.494
chr12	10693352	10693596	122	0.24625	6.56886	0.0147767	Uninfected_unique	103.392	87.1685
chr12	11706964	11707172	104	-0.15335	6.81604	0.0193002	Uninfected_unique	106.844	118.827
chr12	11802768	11803016	124	0.12508	8.97796	0.00481601	Uninfected_unique	526.577	482.846
chr12	11911154	11911346	96	0.23731	7.95118	0.00330144	Uninfected_unique	268.697	227.942
chr12	11911566	11911786	110	0.15364	8.16742	0.00761471	Uninfected_unique	303.224	272.592
chr12	11912091	11912342	126	0.08551	8.11834	0.0134388	Uninfected_unique	286.243	269.77
chr12	11975066	11975369	152	0.34173	8.04495	0.000465729	Uninfected_unique	297.308	234.604
chr12	11975968	11976157	95	0.41582	7.88829	0.000125664	Uninfected_unique	273.652	205.128
chr12	11978338	11978556	109	0.12218	7.32272	0.0164197	Uninfected_unique	167.012	153.451
chr12	12048445	12048634	95	0.18556	8.09933	0.00558411	Uninfected_unique	292.463	257.165
chr12	12054723	12054926	102	0.02286	7.27678	0.022495	Uninfected_unique	156.304	153.847
chr12	12161969	12162154	93	-0.3062	7.79017	0.00158116	Uninfected_unique	199.061	246.129
chr12	12163331	12163796	233	0.19214	8.12923	0.00497616	Uninfected_unique	299.269	261.952
chr12	12177074	12177289	108	0.29326	8.14447	0.000962396	Uninfected_unique	313.235	255.617
chr12	12185831	12186006	88	0.04028	7.778	0.017999	Uninfected_unique	222.574	216.446
chr12	12419717	12420112	198	0.07685	7.69249	0.0169511	Uninfected_unique	212.44	201.42
chr12	12503299	12503598	150	0.0367	7.37466	0.021359	Uninfected_unique	168.081	163.859
chr12	12529675	12529896	111	-0.04504	7.09854	0.0233886	Uninfected_unique	134.926	139.204
chr12	12714567	12714779	106	0.26661	7.44903	0.00452025	Uninfected_unique	191.651	159.314
chr12	12715594	12715900	153	0.32424	7.61996	0.00174051	Uninfected_unique	220.11	175.806
chr12	12717008	12717236	114	0.13014	7.16531	0.0175438	Uninfected_unique	150.162	137.21
chr12	12808929	12809148	110	-0.28915	7.1758	0.00552264	Uninfected_unique	130.801	159.828
chr12	12849810	12850019	105	0.28871	8.24254	0.000761394	Uninfected_unique	334.74	274.029
chr12	12868425	12868617	96	0.25104	7.94232	0.00275724	Uninfected_unique	268.325	225.471
chr12	12961225	12961421	98	0.05064	7.26887	0.0217805	Uninfected_unique	156.953	151.539
chr12	13431137	13431466	165	0.18717	7.42288	0.010653	Uninfected_unique	183.097	160.819
chr12	13515252	13515513	131	0.24985	6.84909	0.0110779	Uninfected_unique	125.715	105.724
chr12	13687851	13688037	93	0.00261	6.86751	0.0260518	Uninfected_unique	116.874	116.663
chr12	14291462	14291669	104	-0.22529	6.90448	0.0121673	Uninfected_unique	110.802	129.528
chr12	14324170	14324347	89	-0.4599	7.11591	0.000645936	Uninfected_unique	118.272	162.676
chr12	14392516	14392745	115	-0.06469	7.58804	0.0182948	Uninfected_unique	188.144	196.773
chr12	14409560	14409752	96	0.33679	7.83341	0.00087258	Uninfected_unique	256.32	202.955
chr12	14426519	14426709	95	0.09326	7.24481	0.0194047	Uninfected_unique	156.654	146.848
chr12	14437157	14437406	125	0.2979	7.81178	0.00180734	Uninfected_unique	249.126	202.648
chr12	14729919	14730151	116	0.11333	6.93503	0.0215958	Uninfected_unique	127.265	117.651
chr12	14876738	14876923	93	0.18894	7.11868	0.0133706	Uninfected_unique	148.38	130.166
chr12	14998311	14998504	97	-0.1423	6.90712	0.0190788	Uninfected_unique	114.244	126.087
chr12	15033987	15034217	115	0.51343	6.56216	0.00141664	Uninfected_unique	112.898	79.0912
chr12	15421969	15422171	101	0.22946	6.62066	0.0148725	Uninfected_unique	106.55	90.8825
chr12	15685429	15685618	95	-0.03296	6.46719	0.0296913	Uninfected_unique	87.4696	89.491
chr12	15743230	15743487	129	-0.00286	7.10674	0.0239918	Uninfected_unique	137.693	137.966
chr12	16140199	16140438	120	0.12253	7.08716	0.0185631	Uninfected_unique	141.87	130.318
chr12	16757926	16758111	93	0.07973	8.19182	0.0128837	Uninfected_unique	300.597	284.435
chr12	17795056	17795233	89	0.0655	6.57384	0.0277185	Uninfected_unique	97.45	93.1246
chr12	18583475	18583650	88	0.39519	6.58813	0.00502843	Uninfected_unique	110.333	83.8963
chr12	21103282	21103460	89	0.11996	7.16993	0.0183066	Uninfected_unique	150.114	138.136
chr12	21322901	21323116	108	0.17348	6.36449	0.0229138	Uninfected_unique	87.5011	77.5874
chr12	24716125	24716360	118	0.16428	8.21187	0.0061904	Uninfected_unique	313.867	280.087
chr12	24967337	24967558	111	0.60729	7.03474	6.86024e-05	Uninfected_unique	161.836	106.234
chr12	25150324	25150532	104	0.02423	9.34393	0.0105636	Uninfected_unique	655.315	644.401
chr12	25310731	25310906	88	-0.16556	6.96958	0.0160933	Uninfected_unique	118.34	132.731
chr12	25402881	25403108	114	0.39159	9.27094	1.16973e-07	Uninfected_unique	707.573	539.375
chr12	25540448	25540670	111	0.02297	7.73037	0.0191369	Uninfected_unique	214.058	210.676
chr12	26480940	26481261	161	0.06008	7.25042	0.0215518	Uninfected_unique	155.467	149.125
chr12	26587345	26587539	97	-0.0983	6.46071	0.0271246	Uninfected_unique	85.1279	91.1304
chr12	26804589	26804818	115	0.23373	6.89802	0.012142	Uninfected_unique	129.327	109.984
chr12	26951079	26951290	106	0.25963	6.40375	0.0144374	Uninfected_unique	92.6401	77.3825
chr12	26986770	26987068	149	0.28571	9.92684	6.5665e-07	Uninfected_unique	1074.68	881.603
chr12	27295141	27295322	91	0.29214	6.56291	0.0101245	Uninfected_unique	104.617	85.44
chr12	27537007	27537198	96	0.1971	7.14476	0.0117179	Uninfected_unique	151.514	132.166
chr12	27687456	27687717	131	-0.09822	7.08909	0.0208078	Uninfected_unique	131.597	140.868
chr12	27856682	27856891	105	-0.06243	7.1338	0.0217989	Uninfected_unique	137.433	143.511
chr12	27977463	27977671	104	0.04494	8.60171	0.0128348	Uninfected_unique	394.582	382.48
chr12	28067253	28067499	123	0.28903	7.23812	0.00521578	Uninfected_unique	166.876	136.58
chr12	31106300	31106555	128	0.33876	7.71699	0.00101549	Uninfected_unique	236.61	187.093
chr12	31138876	31139051	88	-0.18588	7.69932	0.00815849	Uninfected_unique	194.872	221.669
chr12	31165293	31165481	94	-0.19747	7.71918	0.00718519	Uninfected_unique	196.781	225.646
chr12	31174233	31174420	94	0.20892	7.44837	0.00812782	Uninfected_unique	187.771	162.457
chr12	31175935	31176150	108	0.08237	8.1222	0.0134258	Uninfected_unique	286.697	270.787
chr12	31179089	31179517	214	0.41799	7.86388	0.00015559	Uninfected_unique	269.264	201.535
chr12	31184359	31184551	96	0.18698	8.94611	0.00159759	Uninfected_unique	526.248	462.279
chr12	31270081	31270315	117	-0.07816	8.36735	0.0121485	Uninfected_unique	321.41	339.303
chr12	31368895	31369070	88	-0.11414	7.46903	0.0160761	Uninfected_unique	170.303	184.324
chr12	31391830	31392005	88	-0.41718	7.22826	0.00108307	Uninfected_unique	129.757	173.267
chr12	31424924	31425110	93	-0.31835	7.11916	0.00427476	Uninfected_unique	124.499	155.238
chr12	31477942	31478148	103	-0.00787	9.37398	0.0109124	Uninfected_unique	661.705	665.325
chr12	31484259	31484540	141	0.06902	7.03564	0.0229942	Uninfected_unique	134.378	128.1
chr12	31557251	31557431	90	0.07322	8.33628	0.0125439	Uninfected_unique	331.506	315.101
chr12	31558079	31558326	124	0.0858	8.46759	0.0109784	Uninfected_unique	364.681	343.625
chr12	31678765	31678991	113	-0.18325	7.31257	0.0119369	Uninfected_unique	149.184	169.389
chr12	31753291	31753496	103	-0.0869	7.59044	0.016847	Uninfected_unique	187.012	198.623
chr12	31899797	31899978	91	0.43454	6.89175	0.0017308	Uninfected_unique	138.047	102.145
chr12	31921057	31921277	110	-0.29107	6.89978	0.00777147	Uninfected_unique	107.952	132.084
chr12	32267354	32267570	108	-0.15856	7.16658	0.0150795	Uninfected_unique	135.985	151.782
chr12	32414648	32414873	113	0.18456	7.47867	0.0100736	Uninfected_unique	190.144	167.311
chr12	32418503	32418683	90	0.22366	9.04275	0.000511013	Uninfected_unique	569.906	488.062
chr12	32635228	32635522	147	0.48089	7.47488	0.000167658	Uninfected_unique	210.157	150.585
chr12	32636526	32636778	126	0.37183	6.82944	0.00421117	Uninfected_unique	129.37	99.9771
chr12	32646410	32646613	102	0.27935	6.97316	0.00802902	Uninfected_unique	138.413	114.047
chr12	32669103	32669389	143	0.56384	6.86553	0.000300333	Uninfected_unique	141.774	95.91
chr12	32675647	32675886	120	0.32147	8.29384	0.00032811	Uninfected_unique	350.817	280.743
chr12	32686023	32686265	121	0.28089	7.43874	0.00406824	Uninfected_unique	191.233	157.4
chr12	32697861	32698177	158	0.61183	8.02609	1.55019e-07	Uninfected_unique	322.243	210.865
chr12	32824984	32825161	89	0.01464	7.15185	0.0234866	Uninfected_unique	142.93	141.487
chr12	32827780	32828011	116	0.07055	7.72861	0.0172137	Uninfected_unique	217.351	206.978
chr12	34276067	34276276	105	-0.05833	7.17978	0.0220025	Uninfected_unique	142.085	147.948
chr12	38578454	38578629	88	-0.04273	6.74427	0.0266157	Uninfected_unique	105.632	108.808
chr12	39497463	39497642	90	0.59132	6.49905	0.000720762	Uninfected_unique	111.023	73.6897
chr12	39837008	39837209	101	-0.13083	7.50615	0.0147134	Uninfected_unique	173.734	190.225
chr12	40405047	40405296	125	0.1604	6.93132	0.0170985	Uninfected_unique	129.026	115.45
chr12	40501419	40501609	95	0.04113	7.36391	0.0211607	Uninfected_unique	167.089	162.393
chr12	40620485	40620747	131	-0.03426	7.88639	0.0178565	Uninfected_unique	233.821	239.44
chr12	40626572	40626785	107	-0.04336	6.94551	0.0246	Uninfected_unique	121.417	125.122
chr12	40719250	40719429	90	-0.13575	6.84318	0.0211613	Uninfected_unique	109.539	120.347
chr12	40768999	40769204	103	-0.16135	6.65282	0.0208274	Uninfected_unique	95.1509	106.41
chr12	42418101	42418294	97	-0.21272	6.7238	0.0149969	Uninfected_unique	98.1856	113.784
chr12	42690457	42690667	105	-0.11149	6.69334	0.0237053	Uninfected_unique	99.567	107.567
chr12	42790693	42790928	118	0.33227	6.6167	0.00744154	Uninfected_unique	110.113	87.4608
chr12	42877411	42877675	132	0.09084	8.67761	0.00922667	Uninfected_unique	422.565	396.778
chr12	42983472	42983651	90	-0.08276	7.45478	0.0179181	Uninfected_unique	170.473	180.538
chr12	44070033	44070329	148	0.19439	7.04396	0.0133046	Uninfected_unique	141.157	123.363
chr12	45524674	45524852	89	0.01084	6.74858	0.0271132	Uninfected_unique	107.934	107.126
chr12	45937697	45937893	98	-0.1218	6.49859	0.0258818	Uninfected_unique	86.6838	94.3199
chr12	46123620	46123805	93	-0.05264	9.91823	0.00660856	Uninfected_unique	950.083	985.389
chr12	46378407	46378625	109	-0.04013	6.7138	0.0272375	Uninfected_unique	103.518	106.438
chr12	46380512	46380710	99	0.38871	6.97153	0.00257473	Uninfected_unique	143.597	109.681
chr12	46504302	46504481	90	0.071	8.00295	0.014936	Uninfected_unique	262.915	250.289
chr12	46663730	46663927	99	0.13888	9.07782	0.00347793	Uninfected_unique	567.022	514.983
chr12	46780771	46780952	91	0.21384	7.18059	0.0109738	Uninfected_unique	156.228	134.706
chr12	47473467	47473642	88	-0.36356	7.44755	0.00135926	Uninfected_unique	153.892	197.996
chr12	47609915	47610103	94	-0.00874	8.09649	0.0169723	Uninfected_unique	272.879	274.538
chr12	47706646	47706861	108	0.05871	7.06243	0.0232804	Uninfected_unique	136.408	130.968
chr12	47750148	47750390	121	0.09443	6.86417	0.0235119	Uninfected_unique	120.374	112.748
chr12	47802120	47802369	125	-0.00021	7.2778	0.0226401	Uninfected_unique	155.169	155.191
chr12	48111745	48111948	102	0.04341	8.16626	0.0155006	Uninfected_unique	291.624	282.98
chr12	48202407	48202582	88	0.22554	9.33361	0.000215656	Uninfected_unique	697.66	596.691
chr12	48229337	48229522	93	-0.08614	9.93151	0.00381671	Uninfected_unique	947.801	1006.12
chr12	48230590	48230802	106	-0.11793	8.81595	0.00647815	Uninfected_unique	432.629	469.478
chr12	48294232	48294508	138	-0.08658	7.81953	0.0151054	Uninfected_unique	219.221	232.779
chr12	48343334	48343523	95	-0.55462	7.5624	1.95841e-05	Uninfected_unique	155.966	229.08
chr12	48384133	48384382	125	-0.11652	7.71115	0.0138066	Uninfected_unique	201.256	218.185
chr12	49012307	49012515	104	-0.03289	6.93453	0.025	Uninfected_unique	120.935	123.723
chr12	49235667	49235842	88	-0.7003	8.22166	3.27249e-10	Uninfected_unique	234.186	380.515
chr12	49235878	49236129	126	-0.64519	8.26826	3.37653e-09	Uninfected_unique	246.538	385.572
chr12	49247048	49247307	130	0.25605	8.15025	0.00186566	Uninfected_unique	310.462	259.974
chr12	49330278	49330464	93	-0.09535	7.64345	0.0156117	Uninfected_unique	193.444	206.661
chr12	49381950	49382149	100	0.02903	7.57203	0.0200269	Uninfected_unique	192.211	188.382
chr12	49393124	49393325	101	-0.05646	8.59569	0.0121525	Uninfected_unique	379.37	394.511
chr12	49437684	49437869	93	-0.20231	7.90405	0.00546705	Uninfected_unique	223.309	256.925
chr12	49491911	49492089	89	-0.20197	7.55916	0.00839964	Uninfected_unique	175.847	202.271
chr12	49554379	49554796	209	0.26168	8.384	0.000962372	Uninfected_unique	365.782	305.105
chr12	49629037	49629260	112	0.30971	8.78539	8.23508e-05	Uninfected_unique	491.227	396.324
chr12	49691250	49691509	130	0.10856	8.76113	0.00723439	Uninfected_unique	450.508	417.853
chr12	49752507	49752765	129	-0.18741	7.34369	0.0112379	Uninfected_unique	152.217	173.332
chr12	49763746	49763921	88	-0.17101	7.46463	0.0113774	Uninfected_unique	166.471	187.421
chr12	49782961	49783136	88	-0.28062	6.89503	0.00854861	Uninfected_unique	107.987	131.174
chr12	49931670	49931886	108	-0.22625	8.52684	0.00151123	Uninfected_unique	341.021	398.923
chr12	49947415	49947611	98	-0.15998	7.76592	0.00987546	Uninfected_unique	205.919	230.067
chr12	49973246	49973426	90	-0.55321	7.31263	5.76966e-05	Uninfected_unique	131.236	192.569
chr12	50030711	50031009	149	0.15997	7.90817	0.00853132	Uninfected_unique	253.907	227.258
chr12	50038400	50038662	131	0.0477	8.03729	0.0161132	Uninfected_unique	267.082	258.396
chr12	50055071	50055259	94	-0.09921	7.63775	0.0156317	Uninfected_unique	192.424	206.122
chr12	50095919	50096117	99	0.37254	7.10852	0.00232809	Uninfected_unique	157.018	121.284
chr12	50156865	50157067	101	0.14943	7.3191	0.0149537	Uninfected_unique	168.174	151.627
chr12	50172033	50172208	88	-0.3387	7.24291	0.00307046	Uninfected_unique	134.696	170.338
chr12	50235848	50236068	110	0.14433	8.30605	0.00706927	Uninfected_unique	332.732	301.055
chr12	50400665	50400865	100	0.26936	7.00991	0.00814829	Uninfected_unique	141.493	117.395
chr12	50433081	50433316	118	0.00334	7.70893	0.0195012	Uninfected_unique	209.47	208.986
chr12	50464400	50464591	96	-0.13578	7.85155	0.010997	Uninfected_unique	220.351	242.097
chr12	50793996	50794195	100	0.23413	9.19398	0.000249761	Uninfected_unique	635.19	540.037
chr12	51720578	51720872	147	-0.06136	7.75526	0.0174536	Uninfected_unique	211.51	220.7
chr12	51735286	51735475	95	-0.00611	7.3941	0.0216836	Uninfected_unique	167.852	168.564
chr12	51745803	51746009	103	-0.20214	7.30628	0.0104624	Uninfected_unique	147.565	169.76
chr12	51896242	51896489	124	-0.13341	7.28005	0.0157588	Uninfected_unique	148.4	162.777
chr12	52208074	52208306	116	-0.2984	7.81837	0.00182206	Uninfected_unique	203.54	250.31
chr12	52214453	52214808	178	-0.3234	8.3257	0.00028324	Uninfected_unique	286.82	358.891
chr12	52269104	52269299	98	-0.38357	7.43277	0.00102188	Uninfected_unique	151.27	197.342
chr12	52414607	52414859	126	0.11403	8.40939	0.00895374	Uninfected_unique	353.706	326.825
chr12	52418698	52418888	95	0.08386	8.95503	0.00829043	Uninfected_unique	510.922	482.07
chr12	52419088	52419428	170	0.11372	8.93118	0.00586208	Uninfected_unique	507.773	469.285
chr12	52430619	52431015	198	0.33253	8.95975	1.71212e-05	Uninfected_unique	558.733	443.714
chr12	52431053	52431269	108	0.35345	8.93848	7.65232e-06	Uninfected_unique	554.562	434.061
chr12	52444481	52444660	90	0.07227	9.42227	0.00706818	Uninfected_unique	703.499	669.126
chr12	52462797	52462975	89	-0.12745	9.75353	0.00180479	Uninfected_unique	825.89	902.17
chr12	52481833	52482044	106	0.16844	9.18887	0.00161726	Uninfected_unique	618.697	550.52
chr12	52482898	52483120	111	0.14973	9.18585	0.00249637	Uninfected_unique	613.413	552.942
chr12	52533334	52533541	104	-0.12515	7.8076	0.0125978	Uninfected_unique	214.528	233.969
chr12	52545939	52546125	93	-0.39674	8.42419	2.22664e-05	Uninfected_unique	299.377	394.139
chr12	52550604	52550844	120	-0.25502	7.96227	0.00257639	Uninfected_unique	228.296	272.437
chr12	52557771	52557986	108	-0.37314	7.70102	0.000603722	Uninfected_unique	182.842	236.811
chr12	52607290	52607563	137	-0.1842	8.0477	0.00582786	Uninfected_unique	248.241	282.049
chr12	52698781	52699009	114	-0.26079	7.96181	0.00236405	Uninfected_unique	227.767	272.896
chr12	52709607	52709792	93	-0.21594	7.62178	0.00693044	Uninfected_unique	182.76	212.269
chr12	52831907	52832102	98	-0.39105	7.46476	0.000830252	Uninfected_unique	154.262	202.291
chr12	53278650	53278863	107	-0.20138	7.31091	0.0104624	Uninfected_unique	148.079	170.261
chr12	53374686	53374944	129	-0.23289	7.62948	0.00553105	Uninfected_unique	182.662	214.662
chr12	53459769	53459981	106	-0.05136	8.10817	0.0155051	Uninfected_unique	271.064	280.888
chr12	53493191	53493454	132	-0.05145	7.73039	0.0182592	Uninfected_unique	208.61	216.184
chr12	53497750	53497931	91	0.09118	8.16576	0.012557	Uninfected_unique	296.389	278.237
chr12	53599546	53599823	139	0.00864	8.13616	0.0167612	Uninfected_unique	282.182	280.497
chr12	53605660	53605843	92	-0.00357	7.81063	0.0187959	Uninfected_unique	224.231	224.787
chr12	53626572	53626821	125	-0.17382	8.65076	0.00316677	Uninfected_unique	378.421	426.875
chr12	53645411	53645586	88	0.03877	8.99839	0.0114823	Uninfected_unique	518.347	504.603
chr12	53681601	53681779	89	-0.44191	7.77079	0.000100555	Uninfected_unique	187.382	254.539
chr12	53815377	53815621	122	0.01663	7.79193	0.0187526	Uninfected_unique	222.899	220.344
chr12	53835796	53835982	93	0.13799	9.14955	0.00312964	Uninfected_unique	595.742	541.401
chr12	53863863	53864139	138	-0.22203	7.32029	0.00842199	Uninfected_unique	147.982	172.602
chr12	54012567	54012873	153	0.38628	7.46493	0.000956128	Uninfected_unique	201.98	154.535
chr12	54012972	54013289	159	0.25324	7.64565	0.00397445	Uninfected_unique	218.618	183.423
chr12	54095604	54095864	130	0.39155	7.62803	0.000519695	Uninfected_unique	226.569	172.716
chr12	54132316	54132595	140	-0.30249	7.94955	0.00118373	Uninfected_unique	222.599	274.525
chr12	54140481	54140662	91	-0.123	7.97121	0.0109984	Uninfected_unique	240.469	261.871
chr12	54144333	54144556	112	0.18432	9.15109	0.0011397	Uninfected_unique	606.032	533.347
chr12	54149423	54149646	112	0.37208	8.25512	0.000101549	Uninfected_unique	347.57	268.556
chr12	54151034	54151215	91	0.10963	7.92547	0.0124809	Uninfected_unique	252.525	234.047
chr12	54585360	54585670	155	-0.00268	8.14866	0.0167319	Uninfected_unique	283.523	284.05
chr12	54591418	54591638	110	-0.21659	7.67226	0.00609995	Uninfected_unique	189.226	219.877
chr12	54595195	54595472	139	-0.09593	7.82701	0.014605	Uninfected_unique	219.647	234.749
chr12	54601598	54601855	129	-0.25893	8.05609	0.00199767	Uninfected_unique	243.305	291.137
chr12	54688080	54688262	91	-0.26639	7.70994	0.00319697	Uninfected_unique	190.909	229.625
chr12	54752031	54752209	89	0.11842	9.05698	0.00492968	Uninfected_unique	554.941	511.209
chr12	54762533	54762713	90	-0.08155	8.35178	0.0121767	Uninfected_unique	317.586	336.055
chr12	54793159	54793396	119	0.13339	7.58696	0.0139722	Uninfected_unique	201.363	183.58
chr12	54833515	54833696	91	-0.25597	7.21626	0.00744522	Uninfected_unique	136.077	162.494
chr12	54892172	54892383	106	-0.12962	9.3803	0.00283458	Uninfected_unique	637.15	697.046
chr12	54973582	54973826	122	-0.20302	7.96905	0.00526863	Uninfected_unique	233.542	268.832
chr12	55052506	55052719	107	0.01026	7.33788	0.0221464	Uninfected_unique	162.355	161.205
chr12	55074269	55074472	102	0.19013	7.16741	0.0125771	Uninfected_unique	153.54	134.582
chr12	55385235	55385446	106	0.12842	7.9581	0.0109999	Uninfected_unique	259.99	237.847
chr12	55385873	55386080	104	0.10724	7.84903	0.0135819	Uninfected_unique	239.296	222.153
chr12	55387073	55387313	120	0.19773	7.3694	0.00987177	Uninfected_unique	177.081	154.401
chr12	55395061	55395504	222	0.24986	7.39839	0.00627651	Uninfected_unique	183.969	154.714
chr12	55462329	55462508	90	0.30217	6.92976	0.00713244	Uninfected_unique	135.378	109.795
chr12	55466935	55467114	90	-0.09481	7.25255	0.019362	Uninfected_unique	147.559	157.582
chr12	55872542	55872817	138	-0.28899	7.43713	0.00369744	Uninfected_unique	156.784	191.556
chr12	56050308	56050483	88	-0.05613	7.26953	0.021428	Uninfected_unique	151.321	157.324
chr12	56101600	56101858	129	-0.23454	8.05927	0.00306654	Uninfected_unique	245.912	289.324
chr12	56123429	56123655	113	0.06966	9.22746	0.00811355	Uninfected_unique	614.083	585.137
chr12	56123716	56123891	88	0.13531	9.05049	0.00377453	Uninfected_unique	555.693	505.944
chr12	56131098	56131282	92	0.05501	8.60731	0.0123584	Uninfected_unique	397.501	382.63
chr12	56132667	56132842	88	-0.06837	9.14649	0.00859194	Uninfected_unique	553.448	580.308
chr12	56136749	56136938	95	0.0158	8.81937	0.01309	Uninfected_unique	454.227	449.28
chr12	56224319	56224669	175	0.18788	9.25788	0.000895449	Uninfected_unique	653.399	573.615
chr12	56440933	56441164	116	-0.16876	7.69887	0.00979474	Uninfected_unique	195.97	220.288
chr12	56600378	56600594	108	-0.14041	7.88538	0.0104909	Uninfected_unique	225.217	248.239
chr12	56604067	56604373	153	0.3716	7.98599	0.00028168	Uninfected_unique	288.373	222.89
chr12	56696472	56696702	115	0.27514	7.98529	0.00167288	Uninfected_unique	278.756	230.356
chr12	56858202	56858377	88	0.17438	7.66826	0.00918329	Uninfected_unique	216.084	191.483
chr12	56890542	56890769	114	0.39545	7.36365	0.00104428	Uninfected_unique	188.886	143.601
chr12	56959593	56959811	109	0.02204	7.23403	0.0226357	Uninfected_unique	151.697	149.397
chr12	56967263	56967444	91	-0.14944	7.09522	0.016858	Uninfected_unique	129.832	144.001
chr12	56984132	56984317	93	0.25598	7.2353	0.0068932	Uninfected_unique	164.654	137.884
chr12	57022869	57023044	88	0.13789	8.25857	0.00811828	Uninfected_unique	321.242	291.96
chr12	57026167	57026378	106	0.01466	8.60521	0.0141521	Uninfected_unique	391.411	387.454
chr12	57145089	57145289	100	0.07197	8.91477	0.00952688	Uninfected_unique	494.818	470.739
chr12	57381394	57381641	124	0.36266	7.55594	0.00111111	Uninfected_unique	213.378	165.951
chr12	57452315	57452490	88	0.1086	6.68994	0.0237846	Uninfected_unique	107.206	99.4321
chr12	57456507	57456730	112	0.3287	6.86653	0.00552946	Uninfected_unique	130.769	104.126
chr12	57480954	57481151	99	0.25608	9.29295	8.40749e-05	Uninfected_unique	685.489	574.001
chr12	57481265	57481906	321	0.18045	9.82584	0.000279552	Uninfected_unique	966.124	852.535
chr12	57512750	57513090	170	0.12487	7.66731	0.0138672	Uninfected_unique	212.268	194.668
chr12	57518140	57518349	105	-0.15001	7.47245	0.0134191	Uninfected_unique	168.598	187.073
chr12	57609538	57609786	124	0.33449	9.6301	2.43007e-07	Uninfected_unique	889.805	705.673
chr12	57618750	57618960	105	0.03242	9.24542	0.0105604	Uninfected_unique	613.802	600.163
chr12	57623750	57624017	134	0.22301	8.81528	0.000882707	Uninfected_unique	486.665	416.963
chr12	57633854	57634203	175	-0.04465	10.0475	0.00670416	Uninfected_unique	1042.02	1074.77
chr12	57634344	57634556	106	-0.04639	9.78254	0.00760811	Uninfected_unique	866.674	894.995
chr12	57636215	57636416	101	-0.16077	10.2524	0.000183352	Uninfected_unique	1153.64	1289.63
chr12	57848735	57849041	153	0.16507	9.12198	0.00190666	Uninfected_unique	589.977	526.192
chr12	57849104	57849281	89	0.14696	9.50057	0.00158596	Uninfected_unique	762.213	688.394
chr12	57855341	57855617	138	-0.13118	9.01629	0.00427209	Uninfected_unique	494.799	541.899
chr12	57871820	57872113	147	0.20303	8.5552	0.00226098	Uninfected_unique	403.581	350.601
chr12	57873943	57874123	90	0.12932	8.7517	0.00562833	Uninfected_unique	450.805	412.154
chr12	58008341	58008735	197	0.17152	8.3639	0.00462415	Uninfected_unique	349.624	310.433
chr12	58108849	58109064	108	0.06241	8.36166	0.0133981	Uninfected_unique	336.128	321.897
chr12	58109609	58109808	100	0.15204	8.46328	0.00570133	Uninfected_unique	372.036	334.824
chr12	58149927	58150103	88	-0.02688	9.51161	0.00976175	Uninfected_unique	723.159	736.76
chr12	58225269	58225472	102	-0.04025	7.88306	0.0176678	Uninfected_unique	232.798	239.384
chr12	58231922	58232097	88	0.12181	8.55827	0.00737017	Uninfected_unique	393.215	361.378
chr12	58232149	58232330	91	0.10525	8.50083	0.00896389	Uninfected_unique	375.705	349.271
chr12	58286103	58286296	97	-0.15261	8.01922	0.0082372	Uninfected_unique	246.068	273.524
chr12	58511464	58511663	100	-0.24688	7.14521	0.00859972	Uninfected_unique	129.946	154.199
chr12	58570147	58570339	96	0.00851	6.86484	0.0260518	Uninfected_unique	116.897	116.21
chr12	62586294	62586471	89	0.02803	7.34776	0.0218092	Uninfected_unique	164.481	161.316
chr12	62586510	62586688	89	0.06473	7.25777	0.0210106	Uninfected_unique	156.513	149.645
chr12	62829192	62829407	108	0.09564	7.67721	0.0155124	Uninfected_unique	211.576	198.005
chr12	63192991	63193192	101	-0.11349	6.97736	0.0206029	Uninfected_unique	121.147	131.062
chr12	63276563	63276783	110	-0.20223	7.09014	0.0124769	Uninfected_unique	127.03	146.145
chr12	65012982	65013249	134	0.05786	7.39517	0.0201972	Uninfected_unique	171.742	164.991
chr12	65019205	65019380	88	-0.08765	7.27897	0.0198517	Uninfected_unique	150.659	160.096
chr12	65072140	65072343	102	-0.2711	7.21221	0.00621196	Uninfected_unique	134.985	162.891
chr12	65131425	65131609	92	0.1447	7.06121	0.0177935	Uninfected_unique	140.416	127.015
chr12	65174731	65174989	129	-0.11647	7.59225	0.0145765	Uninfected_unique	185.338	200.921
chr12	65190122	65190329	104	0.0353	6.57157	0.0286032	Uninfected_unique	96.2837	93.9564
chr12	65603518	65603736	109	0.22211	6.78715	0.0139722	Uninfected_unique	119.28	102.26
chr12	65950550	65950766	108	-0.2652	6.9761	0.00883192	Uninfected_unique	114.841	138.017
chr12	65996387	65996573	93	-0.14124	6.87989	0.0191426	Uninfected_unique	112.149	123.684
chr12	66797602	66797823	111	-0.30556	6.84907	0.00758469	Uninfected_unique	103.701	128.164
chr12	67091233	67091512	140	0.05436	6.92574	0.024289	Uninfected_unique	123.89	119.309
chr12	67419341	67419566	113	0.2288	6.78411	0.0139722	Uninfected_unique	119.305	101.808
chr12	68337188	68337373	93	-0.01309	6.65634	0.0280348	Uninfected_unique	100.412	101.328
chr12	68383387	68383616	115	0.2624	8.86365	0.000273473	Uninfected_unique	510.176	425.333
chr12	68434326	68434506	90	0.04415	7.11748	0.0232297	Uninfected_unique	141	136.751
chr12	68450193	68450368	88	-0.14306	6.80423	0.020367	Uninfected_unique	106.352	117.438
chr12	68634849	68635091	121	0.04348	7.0911	0.0234693	Uninfected_unique	138.413	134.304
chr12	68985899	68986125	113	0.40444	7.68111	0.000335873	Uninfected_unique	236.112	178.39
chr12	69022772	69022974	101	0.14112	7.14541	0.0167677	Uninfected_unique	148.67	134.816
chr12	69028025	69028214	95	0.38439	7.25959	0.00149495	Uninfected_unique	175.07	134.121
chr12	69032062	69032261	100	0.54934	7.74515	6.9876e-06	Uninfected_unique	259.541	177.353
chr12	69167767	69168015	124	0.45932	7.9939	2.56001e-05	Uninfected_unique	298.908	217.405
chr12	69170172	69170347	88	0.18351	7.37998	0.0105866	Uninfected_unique	177.507	156.306
chr12	69181325	69181519	97	0.25024	7.24239	0.00753789	Uninfected_unique	165.136	138.839
chr12	69224027	69224281	127	0.22979	7.49949	0.00658296	Uninfected_unique	195.956	167.103
chr12	69225117	69225397	140	0.15154	7.14068	0.0159411	Uninfected_unique	148.72	133.891
chr12	69464211	69464398	94	-0.24801	7.13999	0.00787298	Uninfected_unique	129.426	153.702
chr12	69751333	69751526	97	-0.04168	7.36147	0.0211607	Uninfected_unique	162.088	166.839
chr12	70033303	70033479	88	-0.26386	7.07026	0.00836922	Uninfected_unique	122.644	147.257
chr12	70246840	70247102	131	-0.53704	7.54978	3.27944e-05	Uninfected_unique	155.553	225.706
chr12	70247164	70247428	132	-0.5138	7.6717	3.12966e-05	Uninfected_unique	170.639	243.639
chr12	70273262	70273442	90	-0.09262	7.32451	0.0184376	Uninfected_unique	155.223	165.515
chr12	70393254	70393439	93	-0.07322	6.98368	0.0227523	Uninfected_unique	123.389	129.813
chr12	70878338	70878528	95	0.01383	6.64411	0.0281742	Uninfected_unique	100.498	99.5393
chr12	70983802	70983989	94	0.32917	6.64584	0.00756613	Uninfected_unique	112.239	89.3413
chr12	71123862	71124071	105	-0.17899	6.81337	0.0172094	Uninfected_unique	105.703	119.666
chr12	71127300	71127475	88	-0.10304	6.55144	0.0264171	Uninfected_unique	90.5046	97.2051
chr12	72085385	72085560	88	0.15003	7.71853	0.0109502	Uninfected_unique	221.866	199.953
chr12	72140865	72141087	111	0.05017	7.17162	0.0224577	Uninfected_unique	146.698	141.684
chr12	72410914	72411130	108	0.20515	6.96823	0.0141717	Uninfected_unique	134.439	116.619
chr12	72740206	72740404	99	-0.02512	7.15947	0.0234057	Uninfected_unique	141.721	144.21
chr12	74415698	74415899	101	0.02436	6.29016	0.031688	Uninfected_unique	78.9211	77.5997
chr12	74505606	74505781	88	-0.1434	6.90098	0.0190788	Uninfected_unique	113.715	125.599
chr12	75874410	75874716	153	0.49653	7.41486	0.000140545	Uninfected_unique	202.689	143.668
chr12	76486258	76486599	171	0.06144	6.95859	0.0240247	Uninfected_unique	127.055	121.758
chr12	77404819	77405020	101	0.23377	6.68916	0.0138152	Uninfected_unique	111.898	95.1595
chr12	77454315	77454542	114	-0.08591	7.40839	0.0186708	Uninfected_unique	164.899	175.016
chr12	78140037	78140266	115	0.3866	6.64692	0.00465983	Uninfected_unique	114.581	87.6462
chr12	78393906	78394094	94	-0.25709	7.14411	0.00721267	Uninfected_unique	129.388	154.628
chr12	78623379	78623570	96	0.13094	6.77639	0.0214247	Uninfected_unique	114.711	104.758
chr12	79738789	79738968	90	-0.03104	6.67972	0.027228	Uninfected_unique	101.42	103.626
chr12	80075936	80076139	102	0.22666	6.69239	0.0149664	Uninfected_unique	111.873	95.608
chr12	81104329	81104504	88	-0.20914	6.92416	0.0131628	Uninfected_unique	112.954	130.575
chr12	82958563	82958744	91	-0.15782	6.88742	0.0181472	Uninfected_unique	112.09	125.047
chr12	84219965	84220166	101	-0.43207	7.10956	0.00117318	Uninfected_unique	118.893	160.407
chr12	85219050	85219243	97	-0.43574	6.65899	0.00267701	Uninfected_unique	86.8901	117.528
chr12	85268446	85268622	88	0.39045	6.51084	0.00616478	Uninfected_unique	104.406	79.6507
chr12	85817845	85818040	98	0.3422	8.26671	0.000218515	Uninfected_unique	346.764	273.54
chr12	88389443	88389704	131	-0.0082	6.6387	0.0281742	Uninfected_unique	99.3605	99.9268
chr12	89936809	89936995	93	-0.29415	7.15518	0.00545026	Uninfected_unique	128.721	157.833
chr12	90257367	90257569	101	0.13708	7.76561	0.0120806	Uninfected_unique	228.199	207.515
chr12	90343693	90343967	137	0.5478	6.87815	0.000369997	Uninfected_unique	142.227	97.2921
chr12	90496921	90497110	95	0.20823	6.80618	0.0150671	Uninfected_unique	120.284	104.117
chr12	91247907	91248082	88	0.04324	6.50202	0.028889	Uninfected_unique	92.005	89.2883
chr12	91502915	91503132	109	0.12984	6.70863	0.0227267	Uninfected_unique	109.406	99.9899
chr12	91749266	91749468	101	-0.12584	6.89964	0.0200328	Uninfected_unique	114.303	124.721
chr12	92552776	92552954	89	0.13195	7.66747	0.0126953	Uninfected_unique	212.813	194.213
chr12	92553023	92553230	104	0.24345	7.6402	0.00470833	Uninfected_unique	217.056	183.352
chr12	92756589	92756879	145	0.01079	8.78622	0.0133535	Uninfected_unique	443.139	439.837
chr12	92825045	92825241	98	0.0705	6.88132	0.024044	Uninfected_unique	120.808	115.046
chr12	92838595	92838866	136	0.13996	9.33632	0.00239561	Uninfected_unique	678.545	615.809
chr12	92864538	92864815	139	0.23834	8.30393	0.00187926	Uninfected_unique	343.246	290.977
chr12	92964241	92964425	92	-0.13698	7.36344	0.0149044	Uninfected_unique	157.036	172.677
chr12	93560728	93561070	171	0.1072	7.04588	0.0203112	Uninfected_unique	137.138	127.317
chr12	93784398	93784697	150	-0.13822	7.24191	0.0158142	Uninfected_unique	144.287	158.795
chr12	94528127	94528311	92	-0.11319	7.05557	0.0202635	Uninfected_unique	127.909	138.349
chr12	94601612	94601900	144	0.40621	7.46663	0.000640582	Uninfected_unique	203.62	153.652
chr12	94656208	94656484	138	0.15729	7.33289	0.0141969	Uninfected_unique	170.253	152.667
chr12	94926666	94926873	104	-0.30046	7.47899	0.00313213	Uninfected_unique	160.759	197.981
chr12	94954716	94954907	96	-0.18052	7.33089	0.0119553	Uninfected_unique	151.233	171.391
chr12	95209767	95209960	97	0.02392	8.1119	0.0165788	Uninfected_unique	278.949	274.363
chr12	95612652	95612853	101	-0.06895	8.29338	0.0133136	Uninfected_unique	306.322	321.317
chr12	95730326	95730530	102	-0.24061	7.43362	0.0063834	Uninfected_unique	159.048	187.914
chr12	95784075	95784302	114	0.00102	7.18378	0.0234065	Uninfected_unique	145.441	145.338
chr12	95822311	95822541	115	-0.06908	7.48227	0.0192731	Uninfected_unique	174.578	183.141
chr12	95965203	95965414	106	0.09714	7.27103	0.0186554	Uninfected_unique	159.742	149.34
chr12	96017423	96017600	89	-0.27799	7.38963	0.00432548	Uninfected_unique	152.286	184.647
chr12	96312345	96312592	124	0.11978	7.17495	0.0182748	Uninfected_unique	150.627	138.627
chr12	96368765	96369065	150	0.13732	7.22009	0.0166357	Uninfected_unique	156.362	142.166
chr12	96438487	96438729	121	0.04119	7.24468	0.0222702	Uninfected_unique	153.839	149.509
chr12	96592887	96593081	97	0.21061	7.43592	0.00871176	Uninfected_unique	186.267	160.966
chr12	96853180	96853409	115	-0.20489	7.10305	0.0116472	Uninfected_unique	128.054	147.594
chr12	96972398	96972578	90	0.01789	6.48792	0.0296941	Uninfected_unique	90.3132	89.2002
chr12	97301434	97301877	222	0.20056	9.29747	0.000522145	Uninfected_unique	674.535	586.989
chr12	97542807	97543040	117	0.2057	7.03883	0.0123974	Uninfected_unique	141.208	122.444
chr12	98791164	98791345	91	-0.17265	7.81252	0.00837821	Uninfected_unique	211.747	238.665
chr12	98960701	98960886	93	-0.08538	7.35853	0.0189073	Uninfected_unique	159.326	169.04
chr12	99029865	99030045	90	0.17591	6.81451	0.0172094	Uninfected_unique	119.632	105.9
chr12	99092740	99092926	93	0.12833	6.47181	0.0249704	Uninfected_unique	92.795	84.8972
chr12	99119728	99119921	97	-0.13054	6.59774	0.0242751	Uninfected_unique	92.5698	101.336
chr12	99349195	99349400	103	0.06684	6.68725	0.0267094	Uninfected_unique	105.469	100.694
chr12	99675943	99676118	88	0.15619	6.60225	0.0209513	Uninfected_unique	102.561	92.0378
chr12	99807609	99807838	115	0.1997	6.85363	0.0150983	Uninfected_unique	123.938	107.917
chr12	100378441	100378674	117	-0.15368	7.43917	0.0134316	Uninfected_unique	164.544	183.039
chr12	100548626	100548847	111	-0.45798	7.84112	5.93585e-05	Uninfected_unique	195.65	268.748
chr12	101062753	101062995	121	-0.00892	7.01405	0.0247176	Uninfected_unique	128.854	129.653
chr12	101717593	101717796	102	0.29944	6.56697	0.0101245	Uninfected_unique	105.178	85.4643
chr12	101797227	101797414	94	0.2375	6.7478	0.0128407	Uninfected_unique	116.691	98.979
chr12	102222736	102222930	97	0.21883	7.77146	0.00551426	Uninfected_unique	235.711	202.537
chr12	102232821	102233055	117	0.28973	7.73623	0.00223426	Uninfected_unique	235.747	192.854
chr12	102233622	102233832	105	0.23032	7.69169	0.00527937	Uninfected_unique	223.922	190.881
chr12	102250492	102250690	99	0.33017	6.75711	0.00643069	Uninfected_unique	121.28	96.4711
chr12	102333680	102333857	89	-0.24592	6.69929	0.0127149	Uninfected_unique	95.4273	113.162
chr12	102335483	102335658	88	-0.26851	7.029	0.00822447	Uninfected_unique	118.994	143.336
chr12	102404422	102404754	166	0.26266	8.00098	0.00206015	Uninfected_unique	280.588	233.884
chr12	103311045	103311369	162	-0.05163	7.26749	0.021428	Uninfected_unique	151.343	156.857
chr12	103969106	103969343	119	-0.07428	7.11733	0.0219281	Uninfected_unique	135.316	142.466
chr12	104271771	104272031	130	-0.12507	7.39482	0.0155659	Uninfected_unique	161.153	175.747
chr12	104503037	104503220	92	0.12411	6.75939	0.0224633	Uninfected_unique	113.099	103.776
chr12	104775628	104775855	114	-0.09735	7.47836	0.0172693	Uninfected_unique	172.408	184.443
chr12	104851655	104851883	114	0.11611	8.8787	0.00604179	Uninfected_unique	490.04	452.146
chr12	104852226	104852419	97	0.10814	8.32865	0.0100539	Uninfected_unique	333.772	309.668
chr12	104875964	104876207	122	0.17529	7.41627	0.0113343	Uninfected_unique	181.511	160.744
chr12	104879476	104879722	123	0.06413	7.06545	0.0227706	Uninfected_unique	136.951	130.997
chr12	104965306	104965504	99	-0.01355	7.44451	0.0212481	Uninfected_unique	173.373	175.009
chr12	104969314	104969548	117	0.1847	7.44377	0.0100172	Uninfected_unique	185.609	163.304
chr12	104976125	104976322	99	-0.04415	9.26441	0.00997043	Uninfected_unique	605.648	624.468
chr12	105446858	105447093	118	0.25497	6.54224	0.0134943	Uninfected_unique	101.809	85.3166
chr12	105466682	105466879	99	0.11776	7.06275	0.0194617	Uninfected_unique	139.259	128.344
chr12	105503398	105503622	112	0.23322	7.52722	0.00615417	Uninfected_unique	199.996	170.144
chr12	105750912	105751162	125	0.35451	7.33085	0.0018774	Uninfected_unique	182.039	142.379
chr12	106617963	106618140	89	0.19415	7.39964	0.00993979	Uninfected_unique	180.608	157.867
chr12	106697026	106697313	144	0.32297	8.82447	4.37665e-05	Uninfected_unique	507.04	405.339
chr12	106780037	106780219	91	0.16392	6.63586	0.0208689	Uninfected_unique	105.26	93.9551
chr12	107301315	107301503	94	-0.21398	7.18627	0.0102049	Uninfected_unique	135.231	156.852
chr12	107368390	107368600	105	0.30008	6.78954	0.00817622	Uninfected_unique	122.75	99.6985
chr12	107883864	107884120	128	-0.03063	7.31514	0.0220073	Uninfected_unique	157.567	160.948
chr12	107886644	107886862	109	0.06479	7.8683	0.0162133	Uninfected_unique	238.972	228.477
chr12	108001384	108001585	101	-0.06349	7.43316	0.0195436	Uninfected_unique	169.063	176.669
chr12	108963753	108963928	88	0.006	7.73139	0.0193175	Uninfected_unique	212.953	212.069
chr12	109006004	109006193	95	-0.1039	7.61729	0.0151148	Uninfected_unique	189.406	203.55
chr12	109011100	109011370	135	-0.05621	8.48284	0.0129999	Uninfected_unique	350.856	364.796
chr12	109011969	109012163	97	0.03228	8.32566	0.0151613	Uninfected_unique	324.438	317.26
chr12	109034909	109035156	124	0.12736	8.50866	0.00700408	Uninfected_unique	380.655	348.492
chr12	109035832	109036047	108	0.14224	8.62065	0.00541985	Uninfected_unique	413.508	374.684
chr12	109047077	109047327	125	0.11758	7.55415	0.0146396	Uninfected_unique	195.76	180.438
chr12	109061125	109061300	88	-0.12034	7.27411	0.0172649	Uninfected_unique	148.461	161.376
chr12	109086005	109086392	194	0.18785	8.04985	0.00546748	Uninfected_unique	282.827	248.297
chr12	109124570	109124789	110	0.15624	9.96497	0.000484177	Uninfected_unique	1055.05	946.757
chr12	109197375	109197561	93	0.24608	7.1176	0.0092684	Uninfected_unique	151.234	127.518
chr12	109215863	109216043	90	-0.37069	7.01084	0.00268226	Uninfected_unique	113.417	146.645
chr12	109232212	109232420	104	0.14937	7.25651	0.0150155	Uninfected_unique	161.031	145.193
chr12	109255768	109255979	106	0.15733	7.71522	0.0103794	Uninfected_unique	221.918	198.99
chr12	109278295	109278480	93	-0.07803	7.40038	0.0187097	Uninfected_unique	164.434	173.573
chr12	109344946	109345184	119	-0.16402	7.42154	0.0127336	Uninfected_unique	161.964	181.465
chr12	109491663	109491930	134	0.16959	8.36282	0.0049044	Uninfected_unique	349.129	310.409
chr12	109560764	109561000	118	0.2856	7.28749	0.00537947	Uninfected_unique	172.481	141.503
chr12	109702071	109702267	98	-0.11145	7.6131	0.0151313	Uninfected_unique	188.363	203.492
chr12	109865926	109866116	95	0.15698	7.47196	0.0127406	Uninfected_unique	187.461	168.134
chr12	110035595	110035838	122	-0.19043	7.82728	0.00697012	Uninfected_unique	212.61	242.61
chr12	110213182	110213377	98	-0.26048	7.77296	0.00337138	Uninfected_unique	199.843	239.387
chr12	110327108	110327337	115	0.16859	7.75442	0.00932246	Uninfected_unique	228.922	203.675
chr12	110331056	110331379	162	0.30997	8.47282	0.000235498	Uninfected_unique	395.574	319.093
chr12	110353414	110353665	126	0.11808	7.38893	0.0162588	Uninfected_unique	174.607	160.885
chr12	110517401	110517589	94	-0.01743	7.71836	0.0192256	Uninfected_unique	209.331	211.876
chr12	110517627	110517835	104	-0.07508	7.73082	0.0167794	Uninfected_unique	206.97	218.027
chr12	110540107	110540419	156	-0.0204	7.34728	0.0219438	Uninfected_unique	161.689	163.992
chr12	110683366	110683650	142	0.19841	7.43361	0.00933941	Uninfected_unique	185.184	161.39
chr12	110792959	110793141	91	-0.17424	7.57098	0.0102158	Uninfected_unique	179.005	201.984
chr12	110950313	110950510	99	-0.09438	7.03527	0.0210806	Uninfected_unique	126.947	135.529
chr12	110968994	110969238	122	-0.04736	8.69699	0.0123033	Uninfected_unique	408.25	421.874
chr12	111057507	111057721	107	0.29237	8.40863	0.000467206	Uninfected_unique	376.059	307.075
chr12	111058614	111058796	91	0.10127	8.19576	0.0113113	Uninfected_unique	303.677	283.092
chr12	111065681	111065902	111	0.18158	7.85317	0.00748255	Uninfected_unique	246.247	217.125
chr12	111108003	111108178	88	0.06478	8.64115	0.0115268	Uninfected_unique	408.315	390.387
chr12	111115485	111115681	98	0.10519	8.4625	0.00930425	Uninfected_unique	365.847	340.121
chr12	111116281	111116457	88	0.03375	8.06695	0.0166559	Uninfected_unique	271.315	265.042
chr12	111129411	111129587	88	-0.03956	7.53774	0.0200141	Uninfected_unique	183.287	188.382
chr12	111325859	111326118	130	-0.19114	7.64929	0.00805127	Uninfected_unique	187.887	214.504
chr12	111332256	111332466	105	-0.1105	7.56996	0.0158125	Uninfected_unique	182.874	197.432
chr12	111343970	111344233	132	-0.11911	8.12346	0.0105154	Uninfected_unique	267.595	290.625
chr12	111374975	111375192	109	-0.05888	7.36476	0.020405	Uninfected_unique	161.492	168.219
chr12	111471112	111471329	109	-0.08057	7.79395	0.0160953	Uninfected_unique	215.817	228.213
chr12	111540006	111540216	105	-0.12939	8.12813	0.00965309	Uninfected_unique	267.507	292.608
chr12	111736742	111736939	99	-0.45798	7.84112	5.93585e-05	Uninfected_unique	195.65	268.748
chr12	111842718	111842943	113	0.17612	10.2366	9.27779e-05	Uninfected_unique	1282.43	1135.05
chr12	111967314	111967532	109	0.1554	6.5644	0.0222444	Uninfected_unique	99.8783	89.6791
chr12	112027348	112027548	100	-0.26136	7.21326	0.00744522	Uninfected_unique	135.54	162.46
chr12	112036390	112036683	147	0.0357	9.53277	0.00928902	Uninfected_unique	749.934	731.604
chr12	112134598	112134887	145	0.16619	7.06206	0.0151239	Uninfected_unique	141.549	126.147
chr12	112163138	112163317	90	-0.00322	7.33038	0.0222149	Uninfected_unique	160.761	161.12
chr12	112191056	112191260	102	0.01528	7.44396	0.0212481	Uninfected_unique	175.047	173.203
chr12	112195594	112195854	130	-0.00943	8.2483	0.0161196	Uninfected_unique	303.086	305.074
chr12	112213405	112213604	100	-0.14942	7.55567	0.0127345	Uninfected_unique	178.646	198.141
chr12	112636046	112636262	108	-0.18145	7.23569	0.0134343	Uninfected_unique	141.53	160.498
chr12	112740991	112741166	88	0.1411	7.0029	0.0179152	Uninfected_unique	134.685	122.136
chr12	113376328	113376515	94	0.10743	7.98374	0.0124121	Uninfected_unique	262.733	243.88
chr12	113377590	113377808	109	-0.06588	8.24175	0.0137839	Uninfected_unique	295.868	309.692
chr12	113417163	113417375	106	0.16712	8.23238	0.00588733	Uninfected_unique	318.675	283.818
chr12	113468636	113469032	198	0.38397	7.42577	0.00115696	Uninfected_unique	196.414	150.517
chr12	113486590	113486786	98	0.07956	8.15931	0.013335	Uninfected_unique	293.881	278.114
chr12	113494376	113494593	109	0.0198	8.82336	0.0129899	Uninfected_unique	456.117	449.9
chr12	113502883	113503098	108	0.06776	8.72703	0.010821	Uninfected_unique	433.807	413.903
chr12	113524262	113524440	89	0.09206	9.07364	0.00710916	Uninfected_unique	556.281	521.893
chr12	113528569	113528863	147	0.3469	8.29978	0.00016587	Uninfected_unique	355.383	279.427
chr12	113541952	113542162	105	0.17351	8.40904	0.00445275	Uninfected_unique	360.985	320.079
chr12	113568605	113568818	107	0.24622	9.10257	0.000219197	Uninfected_unique	598.696	504.762
chr12	113655314	113655513	100	0.26805	7.58871	0.00379397	Uninfected_unique	211.239	175.422
chr12	113667603	113667825	111	0.28722	7.76136	0.00207625	Uninfected_unique	239.681	196.413
chr12	113900267	113900442	88	-0.20785	7.98024	0.00493263	Uninfected_unique	234.967	271.379
chr12	114355104	114355288	92	-0.01169	7.22477	0.0230138	Uninfected_unique	148.975	150.187
chr12	117037546	117037726	90	-0.13603	7.15087	0.0175691	Uninfected_unique	135.566	148.971
chr12	117135227	117135420	97	-0.18187	7.32176	0.0119463	Uninfected_unique	150.209	170.39
chr12	117146338	117146537	100	0.49253	9.00471	4.09139e-09	Uninfected_unique	609.286	433.067
chr12	117146765	117146992	114	0.40239	8.37127	2.37586e-05	Uninfected_unique	380.688	288.03
chr12	117159042	117159272	115	0.52861	6.90275	0.000480318	Uninfected_unique	143.714	99.6256
chr12	117256388	117256586	99	0.37177	9.07129	1.61889e-06	Uninfected_unique	611.91	472.904
chr12	117317569	117317785	108	-0.02438	8.19942	0.0161129	Uninfected_unique	291.475	296.443
chr12	117463349	117463560	106	-0.44576	7.91288	6.53763e-05	Uninfected_unique	206.5	281.26
chr12	117650497	117650695	99	0.12928	7.18534	0.0174933	Uninfected_unique	152.216	139.17
chr12	117804918	117805097	90	0.06023	7.45641	0.019848	Uninfected_unique	179.336	172.004
chr12	118312656	118312965	155	-0.08496	7.16017	0.0210823	Uninfected_unique	138.88	147.304
chr12	118558775	118558974	100	-0.30636	6.96832	0.00658495	Uninfected_unique	112.606	139.247
chr12	118797442	118797619	89	-0.07686	6.73787	0.0250514	Uninfected_unique	103.928	109.615
chr12	118814464	118814732	134	0.01525	8.6767	0.0138089	Uninfected_unique	411.379	407.054
chr12	120339919	120340169	125	-0.43785	7.17939	0.000862912	Uninfected_unique	124.54	168.7
chr12	120427583	120427859	138	0.18222	9.97668	0.000163418	Uninfected_unique	1073.26	945.917
chr12	120633598	120633836	119	0.05503	8.53617	0.0128315	Uninfected_unique	378.378	364.217
chr12	120663601	120664180	290	0.22244	8.36974	0.00218047	Uninfected_unique	357.292	306.24
chr12	120868266	120868569	152	0.10199	7.68444	0.0154926	Uninfected_unique	213.107	198.562
chr12	120891823	120892032	105	0.38217	7.13697	0.00186371	Uninfected_unique	160.681	123.288
chr12	121079210	121079440	115	0.08161	8.42411	0.0117036	Uninfected_unique	353.34	333.908
chr12	121151787	121151980	97	0.16506	7.29442	0.0134471	Uninfected_unique	166.22	148.25
chr12	121294890	121295065	88	0.21918	6.93355	0.0122154	Uninfected_unique	131.885	113.297
chr12	121498275	121498519	122	-0.3265	7.48629	0.00204803	Uninfected_unique	160.123	200.79
chr12	121533744	121534044	150	-0.08707	7.51517	0.017126	Uninfected_unique	177.495	188.537
chr12	121661311	121661490	90	-0.30021	7.71024	0.00216484	Uninfected_unique	188.724	232.38
chr12	121772604	121772853	125	0.00071	7.07776	0.0242564	Uninfected_unique	135.122	135.055
chr12	121861125	121861341	108	-0.02696	7.40792	0.0213669	Uninfected_unique	168.247	171.421
chr12	121881117	121881339	111	-0.23162	8.24527	0.00225318	Uninfected_unique	280.034	328.803
chr12	121904253	121904484	116	0.25567	9.75152	1.10407e-05	Uninfected_unique	941.851	788.893
chr12	121937778	121937976	99	-0.34324	7.71454	0.000895735	Uninfected_unique	186.486	236.576
chr12	122017155	122017383	114	-0.14233	8.11835	0.00878992	Uninfected_unique	264.511	291.937
chr12	122018178	122018516	169	0.30162	8.39352	0.000408595	Uninfected_unique	373.336	302.903
chr12	122075460	122075763	152	0.29672	7.8293	0.00166547	Uninfected_unique	252.066	205.208
chr12	122156844	122157049	103	-0.25184	7.23596	0.00750744	Uninfected_unique	138.145	164.493
chr12	122214146	122214321	88	-0.30526	8.23877	0.000556668	Uninfected_unique	271.751	335.786
chr12	122232908	122233092	92	0.11099	9.83161	0.00243876	Uninfected_unique	946.924	876.807
chr12	122256653	122256945	146	-0.17537	7.95349	0.00723581	Uninfected_unique	233.262	263.412
chr12	122365440	122365629	95	0.04544	7.18886	0.0226981	Uninfected_unique	148.218	143.623
chr12	122377141	122377377	118	0.09363	6.66778	0.0248004	Uninfected_unique	105.025	98.4258
chr12	122419290	122419467	89	0.17503	9.01239	0.00182353	Uninfected_unique	548.712	486.021
chr12	122429228	122429403	88	-0.07411	8.42974	0.0120088	Uninfected_unique	336.086	353.801
chr12	122429938	122430339	201	-0.11952	8.2983	0.00929755	Uninfected_unique	302.028	328.116
chr12	122434962	122435161	100	0.05754	7.40802	0.0201462	Uninfected_unique	173.259	166.485
chr12	122457054	122457239	93	0.10011	8.15703	0.0117599	Uninfected_unique	295.514	275.704
chr12	122459649	122459959	155	0.31481	9.30399	6.21842e-06	Uninfected_unique	704.959	566.756
chr12	122460147	122460428	141	0.26908	9.31017	4.31194e-05	Uninfected_unique	696.853	578.282
chr12	122492292	122492549	129	-0.16765	7.67256	0.0103386	Uninfected_unique	192.503	216.224
chr12	122615661	122615869	104	-0.20756	7.48994	0.00823154	Uninfected_unique	167.285	193.169
chr12	122675498	122675737	120	-0.24075	7.77465	0.00400875	Uninfected_unique	201.45	238.034
chr12	123012205	123012394	95	0.18777	9.50499	0.00050286	Uninfected_unique	775.442	680.808
chr12	123278351	123278536	93	-0.1847	6.81596	0.0172094	Uninfected_unique	105.684	120.118
chr12	123356557	123356930	187	0.11833	7.44615	0.0154721	Uninfected_unique	181.687	167.38
chr12	123365366	123365590	112	0.52745	7.08022	0.000303238	Uninfected_unique	162.46	112.712
chr12	123419275	123419487	106	-0.17979	7.7645	0.00828152	Uninfected_unique	204.308	231.424
chr12	123436920	123437146	113	-0.06785	7.76828	0.0170303	Uninfected_unique	212.948	223.202
chr12	123542118	123542358	120	0.05224	8.42391	0.0134565	Uninfected_unique	349.714	337.277
chr12	123546445	123546682	119	0.17883	8.30472	0.00477266	Uninfected_unique	336.424	297.203
chr12	123548149	123548375	113	0.24644	8.77994	0.00055515	Uninfected_unique	478.76	403.583
chr12	123565317	123565499	91	0.27135	8.09325	0.0015942	Uninfected_unique	300.022	248.581
chr12	123570326	123570524	99	0.11281	8.37286	0.00930823	Uninfected_unique	344.716	318.788
chr12	123611747	123611983	118	0.58674	8.31065	3.17687e-08	Uninfected_unique	389.106	259.085
chr12	123755982	123756157	88	0.26856	8.83871	0.000235818	Uninfected_unique	502.504	417.152
chr12	124016786	124016961	88	-0.37558	7.89796	0.000292686	Uninfected_unique	209.408	271.677
chr12	124103094	124103348	127	-0.16336	7.46115	0.01274	Uninfected_unique	166.511	186.474
chr12	124396046	124396244	99	-0.46222	8.28446	5.69539e-06	Uninfected_unique	265.644	365.967
chr12	124491223	124491440	109	0.28841	7.44292	0.00369744	Uninfected_unique	192.288	157.446
chr12	124725132	124725310	89	-0.21288	7.37438	0.00856336	Uninfected_unique	154.123	178.629
chr12	124758320	124758525	103	-0.18629	7.26374	0.0118847	Uninfected_unique	144.067	163.924
chr12	124875944	124876157	107	-0.01089	8.52077	0.0146205	Uninfected_unique	365.905	368.677
chr12	124941767	124942022	128	-0.15849	8.75397	0.00378533	Uninfected_unique	408.651	456.103
chr12	124969143	124969401	129	-0.29229	8.02454	0.0011896	Uninfected_unique	235.306	288.152
chr12	125052545	125052763	109	0.23557	9.18417	0.000244093	Uninfected_unique	631.201	536.11
chr12	125094181	125094393	106	0.0608	9.7593	0.00659338	Uninfected_unique	885.102	848.576
chr12	125229321	125229506	93	-0.2421	7.42509	0.00635714	Uninfected_unique	158.028	186.902
chr12	125256409	125256657	124	-0.07373	7.89218	0.0157151	Uninfected_unique	231.572	243.714
chr12	125399115	125399309	97	0.27322	9.41311	2.46089e-05	Uninfected_unique	749.466	620.161
chr12	125425205	125425494	145	0.07099	9.33239	0.00746923	Uninfected_unique	660.715	628.991
chr12	125477444	125477641	99	0.46064	9.04361	1.84404e-08	Uninfected_unique	619.058	449.847
chr12	125479254	125479434	90	0.16359	9.41373	0.0011645	Uninfected_unique	721.835	644.455
chr12	125485626	125485807	91	-0.12409	8.86087	0.00553671	Uninfected_unique	445.359	485.361
chr12	126018104	126018290	93	-0.15241	7.14176	0.0159411	Uninfected_unique	133.95	148.876
chr12	127232188	127232363	88	-0.21138	6.67554	0.0161109	Uninfected_unique	94.9996	109.99
chr12	127359027	127359235	104	-0.10652	6.98656	0.0205536	Uninfected_unique	122.217	131.582
chr12	127865599	127865862	132	0.11883	6.84043	0.0220813	Uninfected_unique	119.415	109.974
chr12	129267691	129268081	195	0.05902	7.74692	0.0175195	Uninfected_unique	219.25	210.461
chr12	129325420	129325734	157	0.31785	7.6615	0.00164399	Uninfected_unique	226.039	181.343
chr12	130516190	130516415	113	0.2347	6.79415	0.0129243	Uninfected_unique	120.384	102.31
chr12	130646431	130646652	111	-0.56141	8.01232	1.0436e-06	Uninfected_unique	212.544	313.653
chr12	130823113	130823288	88	-0.59173	7.96889	4.32402e-07	Uninfected_unique	204.085	307.567
chr12	130991498	130991682	92	-0.3186	7.1371	0.00434897	Uninfected_unique	126.045	157.194
chr12	131232764	131232992	114	-0.06686	7.53025	0.0190131	Uninfected_unique	180.621	189.188
chr12	131358413	131358603	95	0.41074	7.45022	0.000619161	Uninfected_unique	201.633	151.676
chr12	131365043	131365406	182	0.02779	8.25391	0.0156774	Uninfected_unique	308.218	302.337
chr12	131465352	131465618	133	0.04501	9.84191	0.00752032	Uninfected_unique	932.148	903.515
chr12	131476993	131477348	178	0.35508	8.0873	0.000249849	Uninfected_unique	307.585	240.478
chr12	131486957	131487187	115	0.02542	8.01027	0.0172844	Uninfected_unique	260.11	255.567
chr12	131617044	131617232	94	-0.28784	8.06058	0.00125926	Uninfected_unique	241.631	294.985
chr12	131727562	131727755	97	-0.35705	7.31021	0.00183158	Uninfected_unique	140.233	179.611
chr12	131790671	131790846	88	-0.58108	7.65522	5.42321e-06	Uninfected_unique	164.812	246.554
chr12	131939357	131939533	88	-0.40157	7.42641	0.000779315	Uninfected_unique	149.668	197.704
chr12	132239908	132240115	104	-0.0109	6.85404	0.0261636	Uninfected_unique	115.247	116.121
chr12	132312808	132312983	88	-0.42275	8.28959	1.93439e-05	Uninfected_unique	270.262	362.281
chr12	132380651	132381070	210	0.04386	8.55543	0.0134128	Uninfected_unique	381.982	370.544
chr12	132407967	132408166	100	-0.41368	7.86023	0.000152766	Uninfected_unique	201.326	268.182
chr12	132409114	132409318	102	-0.15959	7.922	0.00854923	Uninfected_unique	229.477	256.319
chr12	132486188	132486375	94	-0.17708	6.96843	0.0160933	Uninfected_unique	117.775	133.156
chr12	132638431	132638712	141	-0.26785	8.46617	0.000696372	Uninfected_unique	322.297	388.049
chr12	132812370	132812551	91	-0.59155	9.34256	1.60404e-14	Uninfected_unique	528.876	796.944
chr12	132938934	132939134	100	-0.51328	7.98055	5.35425e-06	Uninfected_unique	211.411	301.746
chr12	133022225	133022481	128	-0.24197	8.87228	0.000471684	Uninfected_unique	430.926	509.615
chr12	133022557	133022883	163	-0.25338	8.75578	0.000485695	Uninfected_unique	395.927	471.943
chr12	133066629	133066885	128	0.05744	9.17961	0.00913793	Uninfected_unique	591.539	568.45
chr12	133100510	133100688	89	-0.09775	8.32204	0.0108058	Uninfected_unique	309.365	331.052
chr12	133135598	133135795	99	0.25378	9.01759	0.000231294	Uninfected_unique	565.93	474.643
chr12	133136500	133136837	169	0.17352	9.63547	0.000554818	Uninfected_unique	844.662	748.942
chr12	133136921	133137292	186	0.04952	9.9255	0.00683708	Uninfected_unique	989.297	955.916
chr12	133177102	133177284	91	0.14408	8.28539	0.0074013	Uninfected_unique	327.972	296.801
chr12	133276857	133277032	88	-0.26431	7.41659	0.00531497	Uninfected_unique	155.895	187.24
chr12	133344622	133344916	147	-0.25999	8.76046	0.000375403	Uninfected_unique	396.304	474.563
chr12	133346692	133346974	141	-0.00784	8.20605	0.0163895	Uninfected_unique	294.501	296.106
chr12	133410819	133411016	99	0.00628	8.07428	0.0171598	Uninfected_unique	270.113	268.94
chr12	133411149	133411337	94	-0.01017	8.14716	0.0167024	Uninfected_unique	282.494	284.492
chr12	133481441	133481629	94	-0.21932	7.51679	0.00717603	Uninfected_unique	169.734	197.601
chr11	135018	135263	123	-0.37171	8.11303	0.000161449	Uninfected_unique	243.398	314.929
chr11	180226	180410	92	0.00473	7.28972	0.0224957	Uninfected_unique	156.724	156.211
chr11	268174	268357	92	0.03307	9.13273	0.0110401	Uninfected_unique	567.81	554.943
chr11	288992	289189	99	-0.28773	8.50432	0.000423319	Uninfected_unique	328.661	401.202
chr11	311116	311322	103	-0.45905	8.27784	6.44439e-06	Uninfected_unique	264.718	363.892
chr11	318452	318668	108	-0.59914	8.62918	6.26488e-10	Uninfected_unique	321.708	487.328
chr11	327042	327423	191	-0.22441	8.12373	0.00323095	Uninfected_unique	258.053	301.483
chr11	397250	397461	106	-0.39668	8.79716	3.2954e-06	Uninfected_unique	387.706	510.405
chr11	411532	411718	93	-0.68781	8.79073	1.65296e-13	Uninfected_unique	348.938	562.081
chr11	575739	575965	113	0.21521	9.92423	4.09726e-05	Uninfected_unique	1046.85	901.776
chr11	597218	597426	104	-0.11833	7.91852	0.0119984	Uninfected_unique	232.221	252.071
chr11	613605	613821	108	-0.46061	8.73968	2.54783e-07	Uninfected_unique	364.399	501.458
chr11	662782	662971	95	-0.21457	7.57714	0.0068077	Uninfected_unique	177.276	205.704
chr11	725852	726042	95	-0.08227	9.03304	0.00802226	Uninfected_unique	509.135	539.013
chr11	783667	783849	91	-0.32575	7.71804	0.00128016	Uninfected_unique	188.075	235.717
chr11	789578	789781	102	-0.01647	8.98512	0.012305	Uninfected_unique	503.862	509.647
chr11	789967	790334	184	0.02353	9.03397	0.0119503	Uninfected_unique	528.491	519.941
chr11	796123	796481	179	0.12518	9.35333	0.00318881	Uninfected_unique	683.084	626.313
chr11	827066	827423	179	-0.28028	8.8712	0.00015926	Uninfected_unique	424.924	516.04
chr11	842696	842984	144	-0.03083	9.252	0.0106595	Uninfected_unique	603.239	616.268
chr11	848407	848582	88	-0.09897	8.99506	0.00685426	Uninfected_unique	493.045	528.055
chr11	849193	849423	115	0.08867	9.45477	0.00534423	Uninfected_unique	723.628	680.492
chr11	849457	849862	203	0.043	9.37091	0.00942601	Uninfected_unique	672.043	652.308
chr11	849964	850172	104	-0.06726	9.26854	0.00826616	Uninfected_unique	602.539	631.295
chr11	1224277	1224476	100	-0.35096	8.46333	8.25166e-05	Uninfected_unique	312.53	398.603
chr11	1281421	1281616	98	-0.5364	8.43431	8.74363e-08	Uninfected_unique	287.239	416.597
chr11	1283897	1284102	103	-0.45241	8.19733	1.29552e-05	Uninfected_unique	250.927	343.35
chr11	1357662	1357941	140	-0.41932	8.20685	3.326e-05	Uninfected_unique	255.502	341.682
chr11	1404582	1404774	96	-0.19306	8.03475	0.00542671	Uninfected_unique	245.269	280.388
chr11	1533286	1533586	150	0.30689	8.43422	0.000295262	Uninfected_unique	384.72	311.001
chr11	1533845	1534237	196	0.20982	8.43886	0.0025114	Uninfected_unique	373.191	322.678
chr11	1536794	1537001	104	-0.05718	8.0585	0.0154218	Uninfected_unique	261.363	271.93
chr11	1543113	1543341	114	0.2831	7.44911	0.00372393	Uninfected_unique	192.76	158.414
chr11	1593467	1593854	194	-0.22301	8.73019	0.0010606	Uninfected_unique	393.082	458.792
chr11	1595976	1596161	93	-0.00065	8.35738	0.0155701	Uninfected_unique	327.887	328.035
chr11	1627217	1627451	117	-0.11168	7.40227	0.0168861	Uninfected_unique	162.741	175.839
chr11	1650129	1650311	91	-0.20429	7.71865	0.00669259	Uninfected_unique	196.244	226.097
chr11	1661424	1661600	88	-0.04649	7.56823	0.0195081	Uninfected_unique	186.753	192.869
chr11	1674004	1674263	130	0.11228	7.71948	0.01434	Uninfected_unique	219.126	202.719
chr11	1692139	1692399	130	-0.51925	8.57401	6.19302e-08	Uninfected_unique	318.331	456.236
chr11	1714526	1714704	89	-0.11749	8.37025	0.00894375	Uninfected_unique	317.696	344.652
chr11	1715240	1715498	129	-0.10147	8.30366	0.0108221	Uninfected_unique	305.055	327.283
chr11	1785087	1785546	230	-0.1993	8.72954	0.00176976	Uninfected_unique	396.146	454.832
chr11	1861191	1861395	102	-0.00171	8.69411	0.01386	Uninfected_unique	413.933	414.424
chr11	1875806	1876066	130	0.10767	9.26252	0.00481418	Uninfected_unique	637.532	591.685
chr11	1968355	1968683	164	-0.14662	8.96398	0.00361618	Uninfected_unique	474.633	525.406
chr11	1974793	1975029	118	-0.22975	7.67823	0.00523777	Uninfected_unique	189.146	221.798
chr11	2023380	2023563	92	0.08407	8.32515	0.0122332	Uninfected_unique	330.197	311.506
chr11	2024110	2024334	112	0.08768	8.27708	0.0119713	Uninfected_unique	319.776	300.921
chr11	2110811	2111022	106	-0.26928	8.03472	0.00178211	Uninfected_unique	238.87	287.887
chr11	2326632	2326840	104	-0.04247	8.48622	0.01369	Uninfected_unique	353.358	363.914
chr11	2399144	2399366	111	0.13712	8.79022	0.00495522	Uninfected_unique	464.257	422.164
chr11	2412090	2412346	128	0.07021	8.90357	0.00954281	Uninfected_unique	490.692	467.384
chr11	2415840	2416042	101	-0.02629	9.1699	0.0112527	Uninfected_unique	570.766	581.262
chr11	2449522	2449710	94	-0.00274	8.20374	0.0164172	Uninfected_unique	294.55	295.11
chr11	2709733	2710058	163	0.10727	8.53717	0.00863792	Uninfected_unique	385.558	357.93
chr11	2909711	2909887	88	-0.02984	7.8383	0.0183093	Uninfected_unique	226.502	231.236
chr11	2913364	2913566	101	-0.13107	8.44546	0.00725447	Uninfected_unique	333.126	364.808
chr11	2935772	2936030	129	0.2195	9.36171	0.000248404	Uninfected_unique	709.894	609.702
chr11	2996905	2997104	100	-0.12254	7.2551	0.0173157	Uninfected_unique	146.406	159.385
chr11	3058555	3058818	132	0.04388	7.4557	0.0205364	Uninfected_unique	178.235	172.896
chr11	3112969	3113286	159	-0.32942	8.31162	0.000243198	Uninfected_unique	283.442	356.147
chr11	3131436	3131612	88	-0.48449	7.59822	9.20911e-05	Uninfected_unique	163.821	229.2
chr11	3178255	3178556	151	-0.26944	8.05799	0.00167391	Uninfected_unique	242.74	292.585
chr11	3300220	3300450	115	0.05108	6.3557	0.0303552	Uninfected_unique	83.3575	80.4578
chr11	3430053	3430233	90	-0.41946	7.71814	0.000210956	Uninfected_unique	182.078	243.516
chr11	3438316	3438504	94	-0.28135	7.8917	0.00180422	Uninfected_unique	215.422	261.81
chr11	3476141	3476380	120	0.1738	7.02109	0.0151316	Uninfected_unique	137.949	122.292
chr11	3611568	3611758	95	-0.32721	7.10511	0.00423717	Uninfected_unique	122.914	154.206
chr11	3830420	3830634	107	0.04797	8.46228	0.0135558	Uninfected_unique	358.608	346.881
chr11	3880852	3881102	125	0.1853	7.77455	0.00779586	Uninfected_unique	233.487	205.344
chr11	3887044	3887262	109	0.07851	7.62258	0.0172178	Uninfected_unique	202.508	191.782
chr11	3888515	3888711	98	-0.03635	7.50836	0.0204429	Uninfected_unique	179.792	184.38
chr11	3924777	3925037	130	0.25591	7.30097	0.00650098	Uninfected_unique	172.317	144.309
chr11	3970449	3970668	110	0.25499	6.92869	0.0103785	Uninfected_unique	133.083	111.523
chr11	4203419	4203610	96	-0.26443	7.61194	0.00386276	Uninfected_unique	178.493	214.399
chr11	5145370	5145545	88	0.68147	6.41538	0.000243004	Uninfected_unique	108.092	67.3985
chr11	5621555	5621826	136	-0.1213	7.11087	0.0192637	Uninfected_unique	132.534	144.159
chr11	5653536	5653722	93	-0.00716	7.7171	0.0194087	Uninfected_unique	209.894	210.939
chr11	5829758	5829949	96	0.02778	7.42994	0.0211854	Uninfected_unique	174.107	170.786
chr11	6319908	6320116	104	0.01329	7.01556	0.0247176	Uninfected_unique	129.985	128.793
chr11	6337152	6337364	106	0.07494	7.07682	0.022126	Uninfected_unique	138.553	131.539
chr11	6374760	6374977	109	-0.21116	7.43844	0.00810613	Uninfected_unique	161.217	186.628
chr11	6384427	6384603	88	-0.30276	7.60081	0.00235318	Uninfected_unique	174.784	215.597
chr11	6455599	6455911	156	-0.0125	7.54892	0.0205054	Uninfected_unique	186.453	188.076
chr11	6464709	6464932	112	-0.04119	7.4779	0.0203755	Uninfected_unique	175.741	180.831
chr11	6591779	6592036	129	-0.17295	7.6179	0.00968371	Uninfected_unique	185.006	208.568
chr11	6732885	6733075	95	-0.05856	6.91461	0.0243791	Uninfected_unique	118.22	123.117
chr11	6759147	6759378	116	0.28361	7.07065	0.0069555	Uninfected_unique	148.308	121.84
chr11	6767577	6767805	114	0.53361	6.86311	0.000520944	Uninfected_unique	140.061	96.7577
chr11	6778698	6778918	110	-0.05247	6.86632	0.0251798	Uninfected_unique	114.57	118.814
chr11	7457946	7458172	113	-0.02244	6.98477	0.0248119	Uninfected_unique	125.675	127.645
chr11	7463867	7464118	126	0.28406	7.2967	0.0048975	Uninfected_unique	173.493	142.485
chr11	7912506	7912755	125	0.4889	7.30169	0.000232275	Uninfected_unique	186.902	133.181
chr11	8028022	8028200	89	0.19363	7.05487	0.0133155	Uninfected_unique	142.191	124.332
chr11	8054812	8054992	90	0.08115	7.7238	0.0168077	Uninfected_unique	217.425	205.533
chr11	8114245	8114473	114	-0.46469	7.62822	0.000118048	Uninfected_unique	168.415	232.416
chr11	8285421	8285611	95	-0.05364	7.58302	0.0191125	Uninfected_unique	188.21	195.34
chr11	8350365	8350574	105	-0.41863	7.62847	0.000296178	Uninfected_unique	171.154	228.775
chr11	8625635	8625851	108	0.16468	7.29901	0.0134481	Uninfected_unique	166.728	148.742
chr11	8709154	8709334	90	-0.07073	8.38504	0.0124268	Uninfected_unique	326.214	342.606
chr11	8753420	8753645	113	0.04283	7.83314	0.0179508	Uninfected_unique	231.45	224.68
chr11	8753864	8754073	105	0.15741	7.88693	0.00898676	Uninfected_unique	249.974	224.135
chr11	8936027	8936224	99	0.19683	7.44608	0.00937442	Uninfected_unique	186.689	162.88
chr11	9037173	9037400	114	0.10158	7.0701	0.0209158	Uninfected_unique	139.188	129.725
chr11	9159373	9159583	105	0.01881	7.31121	0.0222143	Uninfected_unique	159.854	157.784
chr11	9282408	9282634	113	0.18264	7.34699	0.0119724	Uninfected_unique	173.442	152.818
chr11	9556681	9556927	123	0.23404	7.38959	0.00737787	Uninfected_unique	181.851	154.619
chr11	9630672	9630855	92	0.0962	8.21164	0.0120839	Uninfected_unique	306.499	286.728
chr11	9641023	9641198	88	0.37785	7.75827	0.000462476	Uninfected_unique	246.799	189.933
chr11	9686328	9686618	145	0.07917	9.19885	0.00752785	Uninfected_unique	604.013	571.76
chr11	9759676	9759912	118	0.23516	7.51544	0.00613028	Uninfected_unique	198.503	168.647
chr11	9778087	9778349	131	0.20539	8.61766	0.00194401	Uninfected_unique	421.782	365.814
chr11	10098514	10098727	107	0.16171	7.14105	0.0150962	Uninfected_unique	149.283	133.454
chr11	10427769	10428011	121	0.11324	6.98166	0.0213628	Uninfected_unique	131.442	121.519
chr11	10846521	10846736	108	0.28523	6.86877	0.00846063	Uninfected_unique	129.014	105.87
chr11	11177628	11177848	110	-0.12651	7.3399	0.0163797	Uninfected_unique	155.056	169.267
chr11	11273041	11273274	117	0.062	7.83054	0.0167367	Uninfected_unique	232.573	222.79
chr11	11287674	11287870	98	0.12296	7.53686	0.0146645	Uninfected_unique	193.789	177.956
chr11	11521189	11521377	94	-0.03908	6.93109	0.0246938	Uninfected_unique	120.388	123.694
chr11	12030686	12030891	103	-0.55112	7.75018	7.23013e-06	Uninfected_unique	177.863	260.608
chr11	12303436	12303652	108	-0.06535	7.1566	0.021672	Uninfected_unique	139.481	145.944
chr11	12985646	12985881	118	-0.04485	7.38531	0.0209849	Uninfected_unique	164.607	169.805
chr11	14522018	14522195	89	0.09643	8.53332	0.00961419	Uninfected_unique	383.089	358.32
chr11	14654949	14655193	122	-0.05406	7.11365	0.0228955	Uninfected_unique	135.921	141.11
chr11	14996355	14996573	109	-0.29937	7.13425	0.00537629	Uninfected_unique	126.638	155.841
chr11	16627837	16628073	118	-0.05805	7.83221	0.0167367	Uninfected_unique	223.353	232.524
chr11	16967539	16967896	179	-0.04706	7.43	0.0207012	Uninfected_unique	169.656	175.282
chr11	17035479	17035779	150	-0.19322	8.03197	0.00542671	Uninfected_unique	244.783	279.864
chr11	17085058	17085383	163	0.09434	7.34413	0.0183663	Uninfected_unique	167.882	157.255
chr11	17252496	17252717	111	0.12492	7.46698	0.0147726	Uninfected_unique	184.751	169.427
chr11	17376090	17376292	101	0.15121	7.80518	0.00991583	Uninfected_unique	235.696	212.243
chr11	17405541	17405765	112	0.03685	8.06297	0.0164694	Uninfected_unique	270.858	264.028
chr11	17421955	17422194	120	0.08922	8.05455	0.0135969	Uninfected_unique	274.214	257.77
chr11	17526188	17526395	104	0.01374	7.94083	0.0179038	Uninfected_unique	246.886	244.546
chr11	17549764	17549962	99	-0.39043	7.78485	0.000377304	Uninfected_unique	192.623	252.487
chr11	17620592	17620796	102	-0.3692	7.55026	0.000973322	Uninfected_unique	164.924	213.022
chr11	18000345	18000541	98	-0.35785	7.207	0.00262991	Uninfected_unique	130.515	167.257
chr11	18087190	18087369	90	-0.19598	7.1781	0.0117657	Uninfected_unique	135.309	154.996
chr11	18265355	18265580	113	0.27057	7.04599	0.00754939	Uninfected_unique	145.137	120.318
chr11	18405909	18406085	88	0.07113	8.16549	0.0140359	Uninfected_unique	294.282	280.125
chr11	18432023	18432246	112	-0.01829	7.41693	0.0214312	Uninfected_unique	169.811	171.977
chr11	18743626	18743864	119	-0.21021	8.10376	0.00398953	Uninfected_unique	255.761	295.879
chr11	18797291	18797513	111	-0.00542	7.43661	0.0213702	Uninfected_unique	172.913	173.564
chr11	18866367	18866561	97	0.27335	6.71836	0.0106867	Uninfected_unique	115.763	95.7822
chr11	19098594	19098806	106	-0.38006	7.09842	0.00229731	Uninfected_unique	120.125	156.33
chr11	19262062	19262293	116	0.1088	9.79298	0.00267461	Uninfected_unique	921.206	854.289
chr11	19455466	19455655	95	0.05316	8.29061	0.0142094	Uninfected_unique	318.951	307.412
chr11	19480272	19480505	117	-0.11089	6.91906	0.020853	Uninfected_unique	116.454	125.758
chr11	19575311	19575596	143	-0.2306	7.41987	0.00745244	Uninfected_unique	158.086	185.486
chr11	19959869	19960054	93	-0.33242	7.44284	0.00217055	Uninfected_unique	155.054	195.233
chr11	19973146	19973586	220	0.00587	7.33988	0.0221464	Uninfected_unique	162.333	161.674
chr11	19994281	19994456	88	0.03709	7.55705	0.019865	Uninfected_unique	190.757	185.916
chr11	20005981	20006212	116	-0.29797	6.93749	0.00717709	Uninfected_unique	110.546	135.907
chr11	20149861	20150084	112	0.1385	7.34573	0.0149246	Uninfected_unique	170.66	155.038
chr11	20376890	20377065	88	-0.28411	6.81718	0.00911294	Uninfected_unique	102.191	124.434
chr11	20631732	20631958	113	-0.0796	7.02265	0.0218651	Uninfected_unique	126.487	133.662
chr11	20776617	20776798	91	-0.28915	7.1758	0.00552264	Uninfected_unique	130.801	159.828
chr11	22266667	22266867	100	-0.12434	6.41637	0.0264179	Uninfected_unique	81.8097	89.1733
chr11	23561572	23561932	180	0.48356	7.1586	0.000438725	Uninfected_unique	168.942	120.829
chr11	23591117	23591345	114	0.20324	6.7699	0.0161413	Uninfected_unique	117.094	101.707
chr11	26127640	26127903	132	0.58244	7.68256	5.06135e-06	Uninfected_unique	251.389	167.886
chr11	26128107	26128470	182	0.5166	7.67197	3.12966e-05	Uninfected_unique	243.921	170.505
chr11	26298413	26298646	117	0.40195	6.93369	0.00212783	Uninfected_unique	140.523	106.353
chr11	26318804	26319040	118	-0.01075	6.79333	0.0267451	Uninfected_unique	110.504	111.33
chr11	29181171	29181346	88	-0.21081	6.65078	0.0160946	Uninfected_unique	93.4016	108.097
chr11	29365374	29365571	99	0.22258	6.9659	0.0122822	Uninfected_unique	135.035	115.729
chr11	30218243	30218445	101	0.01161	7.08383	0.0241672	Uninfected_unique	136.205	135.113
chr11	30345275	30345473	99	0.02959	9.54641	0.00956879	Uninfected_unique	755.457	740.12
chr11	30365740	30365920	90	-0.02501	8.10387	0.0166074	Uninfected_unique	272.737	277.506
chr11	30939466	30939653	94	0.06852	6.61159	0.0267692	Uninfected_unique	100.138	95.4935
chr11	32112890	32113225	168	-0.02457	7.86986	0.0181195	Uninfected_unique	231.935	235.919
chr11	33061871	33062086	108	0.10416	9.13972	0.00564112	Uninfected_unique	584.8	544.067
chr11	33081965	33082202	119	-0.13631	7.2204	0.0166357	Uninfected_unique	142.246	156.341
chr11	33264913	33265119	103	-0.40984	7.60758	0.000374183	Uninfected_unique	169.209	224.8
chr11	33351384	33351559	88	0.20906	6.46011	0.0186192	Uninfected_unique	94.6572	81.888
chr11	33401552	33401796	122	0.11799	7.78671	0.0131551	Uninfected_unique	230.034	211.97
chr11	33405496	33405683	94	-0.05524	8.18226	0.0149103	Uninfected_unique	284.965	296.088
chr11	33409620	33409847	114	0.09411	8.63926	0.00924743	Uninfected_unique	411.947	385.933
chr11	33411250	33411483	117	0.071	8.45936	0.0119444	Uninfected_unique	360.751	343.427
chr11	33478823	33479035	106	0.03921	7.48209	0.0203755	Uninfected_unique	181.232	176.373
chr11	33483017	33483387	185	0.39825	7.48092	0.000753666	Uninfected_unique	205.08	155.61
chr11	33536986	33537193	104	0.39039	7.04712	0.00246521	Uninfected_unique	151.41	115.514
chr11	33651739	33651922	92	-0.27418	7.24074	0.00631184	Uninfected_unique	137.535	166.321
chr11	33829872	33830123	126	-0.08533	7.54663	0.0175273	Uninfected_unique	181.518	192.577
chr11	34009626	34009810	92	0.08187	7.31885	0.0196654	Uninfected_unique	164.254	155.192
chr11	34074541	34074718	89	0.24563	9.1714	0.000185111	Uninfected_unique	627.823	529.536
chr11	34087520	34087723	102	-0.12868	7.40098	0.0155505	Uninfected_unique	161.64	176.72
chr11	35507360	35507557	99	0.11611	6.70784	0.0227267	Uninfected_unique	108.827	100.412
chr11	35843428	35843676	124	-0.10579	7.23738	0.0180851	Uninfected_unique	145.461	156.528
chr11	36287640	36287851	106	0.02361	7.43183	0.0211854	Uninfected_unique	174.083	171.258
chr11	42546285	42546464	90	0.28581	6.80222	0.0090667	Uninfected_unique	123.223	101.077
chr11	43043090	43043265	88	0.21662	6.88218	0.0130873	Uninfected_unique	127.159	109.43
chr11	43594924	43595100	88	0.17766	6.94092	0.0161062	Uninfected_unique	130.667	115.527
chr11	43810064	43810239	88	0.27384	6.47126	0.0133266	Uninfected_unique	97.5574	80.6912
chr11	44115890	44116098	104	0.08365	6.91852	0.0231231	Uninfected_unique	124.53	117.514
chr11	44581152	44581387	118	-0.04527	7.37659	0.021043	Uninfected_unique	163.592	168.806
chr11	44618181	44618369	94	0.14868	7.97564	0.00909232	Uninfected_unique	265.024	239.072
chr11	44625824	44626043	110	0.04526	8.15111	0.0155706	Uninfected_unique	288.763	279.844
chr11	44631022	44631274	126	0.12333	7.89106	0.0115104	Uninfected_unique	247.747	227.448
chr11	44638511	44638731	110	-0.00797	7.74775	0.0191385	Uninfected_unique	214.341	215.529
chr11	44642762	44642940	89	-0.41738	7.67331	0.000288818	Uninfected_unique	176.634	235.895
chr11	44749421	44749704	142	-0.29422	7.96771	0.00134078	Uninfected_unique	226.066	277.207
chr11	44921629	44921804	88	-0.41104	7.52014	0.000468432	Uninfected_unique	159.192	211.668
chr11	44932995	44933199	102	-0.19261	7.99698	0.00570667	Uninfected_unique	238.968	273.1
chr11	44948723	44948912	95	-0.23198	7.96405	0.00333292	Uninfected_unique	230.41	270.604
chr11	44958095	44958291	98	-0.29338	8.14695	0.000873513	Uninfected_unique	256.046	313.787
chr11	45168107	45168314	104	-0.06017	9.10845	0.0094463	Uninfected_unique	540.58	563.603
chr11	45231743	45231950	104	-0.05928	7.93349	0.015937	Uninfected_unique	239.495	249.54
chr11	45255103	45255318	108	-0.22415	7.77766	0.00511872	Uninfected_unique	203.035	237.163
chr11	45320290	45320482	96	0.00988	7.0513	0.0244377	Uninfected_unique	133.088	132.18
chr11	45392847	45393070	112	0.05797	7.39087	0.0202486	Uninfected_unique	171.238	164.493
chr11	45792867	45793053	93	0.00575	8.78702	0.0133838	Uninfected_unique	442.611	440.85
chr11	45894364	45894548	92	-0.2583	7.40447	0.0057676	Uninfected_unique	154.914	185.287
chr11	45940302	45940515	107	-0.29095	9.75134	1.51897e-06	Uninfected_unique	779.208	953.319
chr11	45943652	45943949	149	0.06512	8.92451	0.00997563	Uninfected_unique	496.989	475.055
chr11	45944109	45944325	108	0.04537	9.12486	0.010487	Uninfected_unique	567.134	549.576
chr11	45986503	45986718	108	0.0001	7.16364	0.0235693	Uninfected_unique	143.379	143.369
chr11	46028067	46028263	98	0.17445	6.39071	0.0228584	Uninfected_unique	89.1359	78.9838
chr11	46148780	46149060	140	0.01571	7.05985	0.0243466	Uninfected_unique	134.15	132.697
chr11	46330197	46330389	96	-0.00186	7.76478	0.0190949	Uninfected_unique	217.346	217.626
chr11	46391090	46391291	101	-0.27841	8.00329	0.00155847	Uninfected_unique	232.984	282.576
chr11	46511603	46511818	108	0.08953	6.91585	0.022457	Uninfected_unique	124.553	117.058
chr11	46559479	46559699	110	0.18447	6.92039	0.0161175	Uninfected_unique	129.125	113.626
chr11	46911261	46911491	115	-0.10573	7.52772	0.0165158	Uninfected_unique	177.892	191.418
chr11	46941501	46941696	98	0.24944	7.45302	0.00592967	Uninfected_unique	191.041	160.708
chr11	47024854	47025106	126	0.22677	7.23956	0.0095853	Uninfected_unique	163.477	139.699
chr11	47131515	47131722	104	0.14196	8.50558	0.00607434	Uninfected_unique	381.77	345.993
chr11	47148275	47148457	91	-0.1508	6.82905	0.0192689	Uninfected_unique	107.907	119.797
chr11	47174674	47174898	112	0.05906	8.14243	0.0150754	Uninfected_unique	288.407	276.838
chr11	47183137	47183364	114	-0.00271	8.35624	0.0155701	Uninfected_unique	327.394	328.01
chr11	47201151	47201348	99	-0.33224	8.04861	0.000525919	Uninfected_unique	235.975	297.085
chr11	47207973	47208160	94	-0.22939	8.28778	0.00234991	Uninfected_unique	288.632	338.374
chr11	47235888	47236067	90	0.14145	8.80386	0.00474894	Uninfected_unique	469.371	425.535
chr11	47236766	47236985	110	0.11499	8.93189	0.00586208	Uninfected_unique	508.247	469.309
chr11	47237820	47238019	100	0.08401	8.09206	0.0135044	Uninfected_unique	280.93	265.038
chr11	47395546	47395721	88	-0.03991	7.96804	0.016966	Uninfected_unique	246.952	253.879
chr11	47398664	47398859	98	-0.02855	8.9336	0.0121185	Uninfected_unique	484.155	493.831
chr11	47399110	47399310	100	-0.11035	9.44811	0.00376146	Uninfected_unique	672.288	725.728
chr11	47433802	47433993	96	-0.212	8.26313	0.00288766	Uninfected_unique	285.457	330.643
chr11	47475856	47476094	119	-0.09637	7.702	0.0154532	Uninfected_unique	201.385	215.297
chr11	47535001	47535207	103	-0.09296	7.04638	0.0210253	Uninfected_unique	127.991	136.51
chr11	47972018	47972222	102	-0.24515	7.40789	0.0063037	Uninfected_unique	155.991	184.883
chr11	48194512	48194691	90	-0.20475	7.42646	0.00869159	Uninfected_unique	160.239	184.674
chr11	48329415	48329606	96	0.18392	6.93229	0.0161121	Uninfected_unique	130.17	114.589
chr11	49547885	49548082	99	0.11253	6.61452	0.0241916	Uninfected_unique	101.884	94.2392
chr11	50017211	50017401	95	0.08986	6.93377	0.0230476	Uninfected_unique	126.124	118.508
chr11	57016617	57016841	112	-0.06466	7.41196	0.0200956	Uninfected_unique	166.529	174.162
chr11	57117391	57117576	93	-0.08466	7.7523	0.0157928	Uninfected_unique	209.379	222.033
chr11	57224903	57225092	95	-0.22572	8.03526	0.00352995	Uninfected_unique	242.594	283.68
chr11	57227895	57228261	183	-0.2256	8.62747	0.00125847	Uninfected_unique	365.739	427.645
chr11	57244095	57244309	107	0.0193	8.41928	0.0149621	Uninfected_unique	344.636	340.056
chr11	57244446	57244655	105	-0.04526	8.45451	0.0138187	Uninfected_unique	345.342	356.347
chr11	57247873	57248071	99	-0.22121	8.09508	0.00341131	Uninfected_unique	253.26	295.228
chr11	57250544	57250812	134	-0.32952	8.19545	0.000367133	Uninfected_unique	261.504	328.605
chr11	57259215	57259449	117	-0.05528	7.529	0.0194242	Uninfected_unique	181.19	188.267
chr11	57282913	57283312	200	0.18185	8.88856	0.00194706	Uninfected_unique	504.771	444.992
chr11	57412362	57412609	124	-0.23594	8.04278	0.00302404	Uninfected_unique	243	286.174
chr11	57568193	57568433	120	0.27791	7.07324	0.0069555	Uninfected_unique	148.282	122.3
chr11	58341368	58341572	102	0.35973	7.42184	0.00147321	Uninfected_unique	194.241	151.374
chr11	58397457	58397672	108	0.14197	6.96862	0.0179866	Uninfected_unique	131.563	119.233
chr11	58443123	58443335	106	0.16233	7.13076	0.0151011	Uninfected_unique	148.254	132.477
chr11	58689608	58689827	110	0.3506	7.36843	0.00175273	Uninfected_unique	186.59	146.335
chr11	58818973	58819195	111	0.17778	6.71459	0.0184096	Uninfected_unique	111.7	98.7494
chr11	58820872	58821077	103	0.40078	6.93958	0.00246589	Uninfected_unique	141.041	106.831
chr11	58862797	58863010	107	0.40831	6.87035	0.00260789	Uninfected_unique	134.784	101.56
chr11	58864717	58864943	113	0.35464	7.97656	0.000401585	Uninfected_unique	284.815	222.744
chr11	58865387	58865701	157	0.44719	8.06791	2.96946e-05	Uninfected_unique	313.323	229.813
chr11	58926038	58926276	119	0.1364	6.95965	0.0198263	Uninfected_unique	130.495	118.723
chr11	58949972	58950184	106	0.05873	7.49704	0.0196093	Uninfected_unique	184.363	177.009
chr11	58953820	58954027	104	-0.06113	7.58259	0.0187224	Uninfected_unique	187.666	195.789
chr11	59039390	59039579	95	-0.02765	8.061	0.0168423	Uninfected_unique	264.509	269.628
chr11	59304779	59304961	91	-0.15811	7.47181	0.0120629	Uninfected_unique	168.051	187.515
chr11	59318673	59318883	105	-0.04521	9.93278	0.00705652	Uninfected_unique	962.188	992.818
chr11	59448091	59448314	112	-0.10074	7.33292	0.0184019	Uninfected_unique	155.692	166.952
chr11	59590504	59590728	112	0.31915	7.01356	0.00548881	Uninfected_unique	144.321	115.679
chr11	59961210	59961429	110	-0.09618	6.85943	0.0228056	Uninfected_unique	112.31	120.052
chr11	60033241	60033426	93	-0.04991	6.99125	0.0242349	Uninfected_unique	125.044	129.446
chr11	60113125	60113300	88	-0.12352	7.09489	0.0185309	Uninfected_unique	130.973	142.681
chr11	60145228	60145466	119	0.06359	7.84798	0.016291	Uninfected_unique	235.531	225.375
chr11	60214116	60214315	100	0.46001	7.27485	0.000418219	Uninfected_unique	181.63	132.041
chr11	60386133	60386473	170	0.20967	7.34314	0.00914381	Uninfected_unique	174.608	150.99
chr11	60691820	60692187	184	-0.02238	8.3961	0.0149568	Uninfected_unique	334.279	339.505
chr11	60699444	60699752	154	0.16858	8.6248	0.00351297	Uninfected_unique	418.502	372.349
chr11	60700130	60700518	194	0.16626	8.7684	0.00323051	Uninfected_unique	461.93	411.649
chr11	60719966	60720221	128	-0.09792	8.73295	0.00834512	Uninfected_unique	411.284	440.168
chr11	60737934	60738112	89	-0.0965	7.55171	0.0164431	Uninfected_unique	181.454	194.006
chr11	60789117	60789487	185	-0.10044	7.92847	0.0134369	Uninfected_unique	235.282	252.246
chr11	60838263	60838438	88	-0.29578	7.85497	0.00156052	Uninfected_unique	208.96	256.508
chr11	60859678	60859913	118	-0.32617	7.73334	0.00130699	Uninfected_unique	190.053	238.265
chr11	60955124	60955300	88	-0.15533	7.02705	0.0169606	Uninfected_unique	123.587	137.636
chr11	61021946	61022152	103	-0.12524	7.6791	0.0132745	Uninfected_unique	196.241	214.038
chr11	61049053	61049255	101	-0.43243	7.65558	0.000238277	Uninfected_unique	173.569	234.232
chr11	61153124	61153362	119	-0.02373	7.66188	0.019593	Uninfected_unique	200.856	204.187
chr11	61159866	61160075	105	-0.21932	7.51679	0.00717603	Uninfected_unique	169.734	197.601
chr11	61355848	61356039	96	-0.49687	8.27146	1.67471e-06	Uninfected_unique	260.118	367.066
chr11	61500957	61501192	118	0.08916	8.12877	0.0126238	Uninfected_unique	288.685	271.384
chr11	61515186	61515413	114	0.00518	8.26641	0.0160673	Uninfected_unique	308.473	307.367
chr11	61519867	61520088	111	-0.38571	8.04901	0.00015427	Uninfected_unique	231.707	302.725
chr11	61540172	61540353	91	-0.27332	8.19868	0.00115168	Uninfected_unique	267.245	322.989
chr11	61544047	61544283	118	-0.09935	8.69585	0.00863646	Uninfected_unique	400.643	429.206
chr11	61649036	61649237	101	0.10214	8.37176	0.0103982	Uninfected_unique	343.182	319.726
chr11	61665172	61665400	114	-0.0895	8.29146	0.011947	Uninfected_unique	303.744	323.184
chr11	61715190	61715382	96	0.0324	7.36788	0.0214204	Uninfected_unique	167.043	163.334
chr11	61735586	61735879	147	0.13545	9.42739	0.00232266	Uninfected_unique	721.63	656.961
chr11	61834401	61834621	110	-0.05176	6.97393	0.0239385	Uninfected_unique	123.473	127.983
chr11	61938768	61939025	129	-0.27713	7.16465	0.00603721	Uninfected_unique	130.335	157.938
chr11	62078709	62078949	120	-0.17522	7.43112	0.0113435	Uninfected_unique	162.411	183.385
chr11	62148323	62148545	111	-0.01749	6.97653	0.0249084	Uninfected_unique	125.173	126.7
chr11	62232144	62232436	146	-0.2353	7.73999	0.00462517	Uninfected_unique	197.039	231.945
chr11	62308913	62309094	91	-0.00291	8.5607	0.0145046	Uninfected_unique	377.215	377.977
chr11	62310294	62310536	121	-0.23576	8.4558	0.0015006	Uninfected_unique	323.567	381.009
chr11	62361062	62361300	119	-0.22565	7.84993	0.00457	Uninfected_unique	213.354	249.476
chr11	62462258	62462495	119	0.06626	7.39984	0.0197302	Uninfected_unique	172.801	165.044
chr11	62537277	62537516	120	0.04243	7.94759	0.0168171	Uninfected_unique	250.524	243.263
chr11	63339915	63340151	118	0.3815	6.88253	0.003013	Uninfected_unique	134.67	103.378
chr11	63340309	63340484	88	0.45387	7.03304	0.00102595	Uninfected_unique	153.275	111.903
chr11	63535678	63536022	172	0.28091	9.01561	0.000100721	Uninfected_unique	570.493	469.557
chr11	63767969	63768218	125	-0.14107	8.82493	0.00456125	Uninfected_unique	431.853	476.214
chr11	63828279	63828522	122	-0.40122	8.22802	4.75527e-05	Uninfected_unique	260.91	344.564
chr11	63853591	63853821	115	-0.2957	7.97766	0.00136304	Uninfected_unique	227.514	279.269
chr11	63913630	63913847	109	-0.19381	7.93754	0.00594499	Uninfected_unique	229.227	262.186
chr11	63916208	63916389	91	-0.38798	7.92365	0.000210517	Uninfected_unique	212.256	277.749
chr11	63972094	63972291	99	-0.08876	7.98453	0.0141906	Uninfected_unique	245.597	261.182
chr11	63982597	63982783	93	0.05724	7.61075	0.0189408	Uninfected_unique	199.379	191.623
chr11	64001760	64002068	154	0.19199	9.26872	0.000747469	Uninfected_unique	659.265	577.119
chr11	64007638	64007813	88	0.08225	9.95445	0.00395079	Uninfected_unique	1020.86	964.291
chr11	64007891	64008126	118	0.13983	10.39	0.000331151	Uninfected_unique	1408.44	1278.34
chr11	64012985	64013256	136	0.09349	9.20824	0.00630216	Uninfected_unique	610.982	572.644
chr11	64014313	64014566	127	0.19789	9.50202	0.000335703	Uninfected_unique	776.566	677.03
chr11	64018776	64019233	229	-0.16137	9.16872	0.00188133	Uninfected_unique	544.216	608.623
chr11	64084413	64084597	92	-0.11782	9.5068	0.00303787	Uninfected_unique	698.39	757.819
chr11	64126921	64127110	95	-0.09176	9.04119	0.00710248	Uninfected_unique	510.338	543.852
chr11	64215790	64215980	95	-0.11099	8.24112	0.0104774	Uninfected_unique	291.151	314.434
chr11	64257335	64257555	110	-0.33024	7.46973	0.00200638	Uninfected_unique	158.091	198.755
chr11	64420655	64420831	88	-0.28776	8.15249	0.00107569	Uninfected_unique	257.532	314.381
chr11	64530478	64530758	140	0.28905	8.29481	0.000683532	Uninfected_unique	347.131	284.106
chr11	64535240	64535470	115	-0.125	8.01801	0.010523	Uninfected_unique	248.226	270.692
chr11	64545277	64545615	169	0.00383	10.0969	0.00850448	Uninfected_unique	1096.57	1093.66
chr11	64546874	64547049	88	-0.0185	10.1552	0.00795041	Uninfected_unique	1133.01	1147.64
chr11	64555112	64555318	103	-0.10415	7.76455	0.0147684	Uninfected_unique	209.742	225.444
chr11	64567147	64567322	88	0.11472	8.65884	0.00715778	Uninfected_unique	420.569	388.422
chr11	64596456	64596703	124	-0.20518	7.90535	0.00546705	Uninfected_unique	223.288	257.413
chr11	64614672	64614848	88	-0.04215	8.56957	0.0131604	Uninfected_unique	374.415	385.515
chr11	64626351	64626585	117	-0.06387	8.62882	0.0115527	Uninfected_unique	387.187	404.713
chr11	64741281	64741554	137	0.68988	7.99281	8.64494e-09	Uninfected_unique	323.529	200.557
chr11	64741700	64741920	110	0.71278	7.98674	3.09405e-09	Uninfected_unique	324.737	198.136
chr11	64752503	64752779	138	-0.16426	7.71134	0.00981232	Uninfected_unique	197.98	221.855
chr11	64845733	64845968	118	0.10724	7.84903	0.0135819	Uninfected_unique	239.296	222.153
chr11	64879896	64880242	173	0.14922	9.84702	0.000804938	Uninfected_unique	969.858	874.558
chr11	64880634	64880848	107	0.143	9.11432	0.00306428	Uninfected_unique	582.381	527.424
chr11	64972311	64972532	111	-0.35972	7.85663	0.000505859	Uninfected_unique	204.615	262.558
chr11	64993143	64993389	123	-0.0391	7.82993	0.0177146	Uninfected_unique	224.47	230.637
chr11	65017827	65018125	149	0.15127	7.44712	0.0134287	Uninfected_unique	183.897	165.592
chr11	65133758	65134001	122	0.14937	7.25651	0.0150155	Uninfected_unique	161.031	145.193
chr11	65171051	65171363	156	0.11261	8.22872	0.0100805	Uninfected_unique	311.918	288.498
chr11	65175198	65175521	162	0.20293	8.043	0.00476021	Uninfected_unique	282.962	245.833
chr11	65183872	65184148	138	0.25922	8.54131	0.000727934	Uninfected_unique	407.575	340.545
chr11	65192738	65192928	95	0.17613	8.13185	0.00602161	Uninfected_unique	298.154	263.889
chr11	65209335	65209530	98	0.45234	8.27105	8.4297e-06	Uninfected_unique	361.342	264.089
chr11	65210958	65211263	153	0.22632	7.96139	0.00360567	Uninfected_unique	269.576	230.437
chr11	65224545	65224751	103	0.02484	7.9099	0.0177153	Uninfected_unique	242.581	238.44
chr11	65238903	65239105	101	0.08229	8.08539	0.0139151	Uninfected_unique	279.467	263.973
chr11	65275818	65275993	88	0.12177	8.17731	0.0100848	Uninfected_unique	301.956	277.516
chr11	65278263	65278575	156	0.20374	7.89935	0.00545097	Uninfected_unique	256.217	222.472
chr11	65320845	65321057	106	-0.22801	8.53947	0.00142072	Uninfected_unique	343.809	402.676
chr11	65343125	65343615	245	0.00967	8.92704	0.0127273	Uninfected_unique	488.385	485.122
chr11	65355651	65356059	204	-0.08385	9.06036	0.00778513	Uninfected_unique	518.584	549.618
chr11	65406005	65406251	123	0.05176	9.37072	0.00882026	Uninfected_unique	673.998	650.245
chr11	65407716	65407907	96	0.26703	9.63377	1.13562e-05	Uninfected_unique	871.457	724.205
chr11	65408137	65408321	92	0.22363	9.41859	0.000179206	Uninfected_unique	739.499	633.313
chr11	65695452	65695857	203	-0.14096	7.87303	0.0104855	Uninfected_unique	223.255	246.17
chr11	65724300	65724483	92	-0.09883	7.57644	0.0157923	Uninfected_unique	184.442	197.52
chr11	65729440	65729624	92	0.03782	8.82097	0.0122505	Uninfected_unique	458.215	446.359
chr11	65789939	65790174	118	-0.02711	7.8526	0.0182327	Uninfected_unique	228.975	233.318
chr11	66045432	66045753	161	-0.05299	8.54725	0.0127934	Uninfected_unique	367.285	381.026
chr11	66092873	66093204	166	-0.3019	8.29428	0.000505079	Uninfected_unique	282.74	348.552
chr11	66095837	66096111	137	0.1315	8.32418	0.00818011	Uninfected_unique	335.444	306.221
chr11	66131455	66131634	90	-0.33023	7.92044	0.000725831	Uninfected_unique	216.066	271.641
chr11	66156395	66156744	175	-0.19558	7.3474	0.0105274	Uninfected_unique	152.177	174.271
chr11	66225369	66225581	106	-0.0058	7.65017	0.0198851	Uninfected_unique	200.474	201.281
chr11	66226683	66226910	114	0.05889	7.49303	0.0196093	Uninfected_unique	183.861	176.507
chr11	66278013	66278188	88	0.1603	7.29658	0.0142142	Uninfected_unique	166.195	148.717
chr11	66335944	66336168	112	-0.17523	7.77974	0.0083191	Uninfected_unique	206.805	233.512
chr11	66346511	66346753	121	-0.04369	7.41117	0.0208133	Uninfected_unique	167.652	172.807
chr11	66462226	66462462	118	-0.09502	7.73987	0.0153358	Uninfected_unique	206.838	220.92
chr11	66565821	66566080	130	0.38029	7.19224	0.00176429	Uninfected_unique	166.847	128.186
chr11	66631445	66631643	99	0.11393	8.96174	0.00566709	Uninfected_unique	518.681	479.297
chr11	66632430	66632646	108	0.17648	9.03296	0.00175151	Uninfected_unique	556.871	492.753
chr11	66650685	66650911	113	0.06378	7.7284	0.0172137	Uninfected_unique	216.81	207.434
chr11	66839271	66839475	102	0.02823	7.69078	0.019221	Uninfected_unique	208.643	204.6
chr11	66888399	66888631	116	0.41504	7.59818	0.000367557	Uninfected_unique	223.743	167.807
chr11	66897650	66897848	99	0.02686	7.23671	0.0226357	Uninfected_unique	152.233	149.425
chr11	67008285	67008648	182	0.16779	8.9092	0.00252749	Uninfected_unique	509.555	453.609
chr11	67030216	67030424	104	-0.25931	8.25292	0.00136693	Uninfected_unique	278.834	333.739
chr11	67033671	67034229	279	0.1668	9.31469	0.00130681	Uninfected_unique	674.694	601.029
chr11	67044469	67044733	132	0.27003	9.67334	7.81732e-06	Uninfected_unique	896.621	743.57
chr11	67132287	67132532	123	0.13874	8.11105	0.00921241	Uninfected_unique	290.103	263.504
chr11	67140349	67140581	116	0.02773	8.54857	0.0141038	Uninfected_unique	378.05	370.853
chr11	67157002	67157184	91	-0.27939	7.73443	0.00245821	Uninfected_unique	193.305	234.611
chr11	67232526	67232746	110	0.29348	9.27316	1.90391e-05	Uninfected_unique	684.971	558.89
chr11	67340238	67340426	94	0.09087	7.08032	0.0208616	Uninfected_unique	139.658	131.133
chr11	67355747	67355936	95	0.01009	8.80732	0.0132057	Uninfected_unique	449.558	446.425
chr11	67382911	67383141	115	-0.23685	8.58973	0.00110138	Uninfected_unique	354.909	418.231
chr11	67407538	67407764	113	-0.1217	8.12982	0.0105143	Uninfected_unique	268.536	292.171
chr11	67412591	67412766	88	0.39349	9.04001	6.89909e-07	Uninfected_unique	603.31	459.291
chr11	67413045	67413255	105	0.40345	9.19962	1.17809e-07	Uninfected_unique	676.218	511.253
chr11	67499696	67499871	88	-0.0024	7.65932	0.0198358	Uninfected_unique	201.987	202.323
chr11	67559822	67560033	106	0.01428	7.55218	0.0204514	Uninfected_unique	188.618	186.76
chr11	67567373	67567569	98	-0.08067	7.7874	0.0161198	Uninfected_unique	214.832	227.187
chr11	67732323	67732538	108	0.14957	6.8825	0.0191426	Uninfected_unique	124.266	112.028
chr11	67764285	67764465	90	-0.60951	8.36932	7.1368e-09	Uninfected_unique	267.717	408.467
chr11	67792614	67792813	100	0.06018	7.62378	0.0185225	Uninfected_unique	201.393	193.165
chr11	67866975	67867242	134	-0.0058	7.25154	0.0227874	Uninfected_unique	152.075	152.688
chr11	67960575	67960769	97	0.48184	7.11009	0.000542494	Uninfected_unique	163.258	116.903
chr11	67973711	67973893	91	0.14877	6.92485	0.0180796	Uninfected_unique	127.932	115.397
chr11	67981024	67981648	312	-0.00012	8.74552	0.0136157	Uninfected_unique	429.186	429.222
chr11	68138986	68139172	93	-0.09837	8.90286	0.0075545	Uninfected_unique	462.617	495.261
chr11	68148035	68148350	158	0.12829	7.87737	0.0115138	Uninfected_unique	245.83	224.913
chr11	68351558	68351782	112	0.36293	6.761	0.00511485	Uninfected_unique	122.996	95.6395
chr11	68593144	68593444	150	-0.09393	7.77677	0.0147356	Uninfected_unique	212.277	226.558
chr11	68654601	68654822	111	-0.127	7.33538	0.0163797	Uninfected_unique	154.545	168.766
chr11	68723714	68723915	101	-0.18373	8.18358	0.00511113	Uninfected_unique	272.803	309.854
chr11	68856197	68856432	118	-0.00463	7.83619	0.0186312	Uninfected_unique	228.156	228.889
chr11	68868918	68869150	116	-0.31082	8.29591	0.000408392	Uninfected_unique	282.185	350.026
chr11	69063569	69063754	93	0.18372	8.22268	0.0048815	Uninfected_unique	318.365	280.298
chr11	69444940	69445115	88	-0.24604	7.19534	0.0080646	Uninfected_unique	134.58	159.605
chr11	69532980	69533235	128	-0.11371	7.77228	0.0137122	Uninfected_unique	210.172	227.407
chr11	70023498	70023691	97	-0.11988	7.86345	0.0120347	Uninfected_unique	223.404	242.761
chr11	70111542	70111730	94	-0.11023	7.19812	0.0182113	Uninfected_unique	141.338	152.56
chr11	70211349	70211530	91	0.62307	6.77843	0.000152949	Uninfected_unique	136.236	88.4564
chr11	70245499	70245730	116	0.12223	8.64265	0.00685093	Uninfected_unique	416.96	383.089
chr11	70601716	70601952	118	-0.23075	7.54315	0.00620118	Uninfected_unique	172.18	202.044
chr11	70661074	70661249	88	-0.40059	7.93269	0.000165554	Uninfected_unique	212.659	280.719
chr11	71084203	71084397	97	-0.12728	8.21498	0.00886694	Uninfected_unique	284.314	310.537
chr11	71350191	71350585	197	-0.05476	8.06538	0.0156923	Uninfected_unique	262.833	273.001
chr11	71532614	71532828	107	0.19027	6.76268	0.0172469	Uninfected_unique	115.987	101.656
chr11	71575095	71575339	122	0.09596	6.71699	0.0244374	Uninfected_unique	108.757	101.759
chr11	71736219	71736462	122	0.13947	7.33233	0.0156719	Uninfected_unique	169.139	153.553
chr11	71855133	71855350	109	0.01103	7.4079	0.0216198	Uninfected_unique	170.475	169.176
chr11	71894561	71894757	98	-0.13813	7.06689	0.0177689	Uninfected_unique	127.807	140.649
chr11	72193388	72193631	122	-0.18537	7.29867	0.0119272	Uninfected_unique	147.645	167.888
chr11	72296818	72297045	114	0.06446	8.15907	0.0147044	Uninfected_unique	292.299	279.526
chr11	72394893	72395121	114	-0.07128	8.53707	0.0114788	Uninfected_unique	362.398	380.753
chr11	72432827	72433014	94	0.08513	9.41823	0.00583644	Uninfected_unique	704.666	664.288
chr11	72436285	72436555	135	-0.02535	8.10912	0.0165788	Uninfected_unique	273.699	278.55
chr11	72449278	72449463	93	0.0469	8.98204	0.0110493	Uninfected_unique	513.952	497.513
chr11	72492893	72493076	92	-0.07928	8.31365	0.0125978	Uninfected_unique	309.546	327.032
chr11	73000533	73000754	111	-0.08866	7.96145	0.0142532	Uninfected_unique	241.708	257.028
chr11	73006552	73006755	102	-0.25356	7.68145	0.00408247	Uninfected_unique	188.011	224.136
chr11	73485497	73485743	123	-0.43119	7.85049	0.000111916	Uninfected_unique	198.762	267.999
chr11	73661906	73662122	108	-0.22816	7.09011	0.0107794	Uninfected_unique	125.891	147.461
chr11	73682350	73682640	145	-0.08357	8.41571	0.0113869	Uninfected_unique	331.744	351.528
chr11	73702582	73702800	109	0.14249	7.82113	0.0104591	Uninfected_unique	237.597	215.252
chr11	73704455	73704691	118	0.14995	7.87612	0.00997607	Uninfected_unique	247.467	223.038
chr11	74108921	74109160	120	0.15665	9.08456	0.0024412	Uninfected_unique	573.196	514.218
chr11	74160479	74160684	103	0.07515	7.12437	0.0218632	Uninfected_unique	143.206	135.937
chr11	74640873	74641063	95	-0.35631	7.07515	0.00289297	Uninfected_unique	119.18	152.568
chr11	74664598	74664837	120	-0.11607	7.54456	0.0152789	Uninfected_unique	179.336	194.361
chr11	74747336	74747551	108	-0.13468	7.69429	0.0126801	Uninfected_unique	197.67	217.012
chr11	74986701	74986917	108	-0.08124	7.4151	0.0186321	Uninfected_unique	165.936	175.548
chr11	75095617	75095798	91	-0.12868	7.40098	0.0155505	Uninfected_unique	161.64	176.72
chr11	75099805	75100026	111	-0.08756	7.44409	0.0179516	Uninfected_unique	168.933	179.504
chr11	75203293	75203519	113	-0.176	7.69484	0.00922966	Uninfected_unique	194.934	220.226
chr11	75417411	75417598	94	-0.22615	7.57424	0.00629223	Uninfected_unique	176.212	206.116
chr11	75434304	75434514	105	-0.0656	7.69157	0.0177903	Uninfected_unique	202.078	211.479
chr11	75514354	75514593	120	-0.05115	7.34757	0.0208959	Uninfected_unique	160.007	165.782
chr11	75534593	75534816	112	0.23023	8.25669	0.0022749	Uninfected_unique	331.257	282.396
chr11	75584540	75584759	110	0.34092	6.98271	0.00426471	Uninfected_unique	142.337	112.381
chr11	75602739	75602957	109	-0.01262	7.11658	0.0239055	Uninfected_unique	138.167	139.381
chr11	75918647	75918887	120	-0.05633	8.41762	0.0132156	Uninfected_unique	335.334	348.686
chr11	75919837	75920100	132	-0.18501	8.66465	0.00265782	Uninfected_unique	380.603	432.68
chr11	75945519	75945747	114	-0.10789	9.34422	0.00439699	Uninfected_unique	626.111	674.729
chr11	75988934	75989160	113	-0.18649	8.00587	0.00611226	Uninfected_unique	240.956	274.206
chr11	76029910	76030107	99	-0.16003	8.04234	0.00740887	Uninfected_unique	249.401	278.659
chr11	76204259	76204494	118	-0.22873	7.38158	0.00735232	Uninfected_unique	154.046	180.511
chr11	76309636	76309855	110	-0.04242	8.03027	0.0166397	Uninfected_unique	257.613	265.3
chr11	76353441	76353656	108	0.21192	7.48521	0.00763704	Uninfected_unique	192.828	166.485
chr11	76375907	76376116	105	0.0496	7.96383	0.0164612	Uninfected_unique	253.99	245.407
chr11	76381606	76381990	192	0.018	8.90839	0.0126209	Uninfected_unique	483.506	477.511
chr11	76391945	76392203	129	0.01912	8.13386	0.0165836	Uninfected_unique	282.757	279.035
chr11	76432894	76433140	123	-0.23768	7.77325	0.00400875	Uninfected_unique	201.468	237.55
chr11	76518543	76518780	119	0.15682	7.43267	0.0134343	Uninfected_unique	182.415	163.626
chr11	76757106	76757373	134	0.12915	7.46506	0.0147726	Uninfected_unique	184.776	168.954
chr11	77184945	77185191	123	-0.38242	7.8212	0.00035948	Uninfected_unique	198.087	258.212
chr11	77711264	77711478	107	0.19881	7.27909	0.0111435	Uninfected_unique	166.398	144.977
chr11	77751090	77751287	99	0.00707	7.45598	0.0212486	Uninfected_unique	176.01	175.15
chr11	77849815	77850015	100	0.23755	8.67575	0.000904553	Uninfected_unique	444.034	376.622
chr11	77934683	77934906	112	-0.09275	8.19444	0.0121078	Uninfected_unique	283.669	302.505
chr11	77939482	77939695	107	0.10514	7.61048	0.0151313	Uninfected_unique	202.679	188.433
chr11	78244412	78244646	117	0.40037	7.14709	0.00143822	Uninfected_unique	162.836	123.375
chr11	78356356	78356578	111	0.10135	7.09151	0.0208078	Uninfected_unique	141.258	131.675
chr11	78509724	78509951	114	-0.10652	6.98656	0.0205536	Uninfected_unique	122.217	131.582
chr11	79969068	79969243	88	0.03971	6.98613	0.0242349	Uninfected_unique	128.532	125.043
chr11	82393329	82393561	116	0.00671	7.54407	0.020615	Uninfected_unique	187.069	186.201
chr11	82406796	82407067	136	-0.15428	7.47007	0.0127406	Uninfected_unique	168.071	187.041
chr11	82412856	82413149	147	0.14421	7.18342	0.0158926	Uninfected_unique	152.803	138.267
chr11	82429346	82429543	99	-0.32164	7.14437	0.0043856	Uninfected_unique	126.549	158.154
chr11	82638364	82638605	121	0.34092	6.98271	0.00426471	Uninfected_unique	142.337	112.381
chr11	82671517	82671771	127	0.22725	8.12252	0.00299559	Uninfected_unique	301.527	257.583
chr11	82718955	82719267	156	0.36084	7.50144	0.00130315	Uninfected_unique	205.338	159.899
chr11	82828363	82828660	149	0.19056	7.52469	0.00891294	Uninfected_unique	196.716	172.375
chr11	82852196	82852388	96	0.10749	7.00697	0.0204559	Uninfected_unique	133.502	123.917
chr11	82862476	82862676	100	0.2959	6.9326	0.00713244	Uninfected_unique	135.35	110.251
chr11	82952476	82952662	93	0.29731	6.68073	0.00957689	Uninfected_unique	113.723	92.5445
chr11	82961172	82961347	88	0.08674	6.81627	0.0238368	Uninfected_unique	116.133	109.357
chr11	82998781	82998957	88	0.27453	7.37922	0.00472001	Uninfected_unique	183.1	151.372
chr11	83004072	83004302	115	0.08524	7.15062	0.0211397	Uninfected_unique	146.346	137.95
chr11	83396171	83396365	97	0.12418	7.01059	0.0196225	Uninfected_unique	134.614	123.511
chr11	83435051	83435247	98	0.0209	7.18996	0.0231677	Uninfected_unique	147.075	144.96
chr11	83539111	83539286	88	-0.15379	6.75053	0.0194541	Uninfected_unique	102.086	113.569
chr11	84269237	84269424	94	0.33514	6.7165	0.00705944	Uninfected_unique	118.117	93.632
chr11	84425421	84425695	137	0.45236	6.56216	0.00276683	Uninfected_unique	110.534	80.783
chr11	84893885	84894085	100	-0.36415	6.59058	0.00650738	Uninfected_unique	84.9478	109.338
chr11	85451901	85452377	238	0.33574	7.64701	0.00128226	Uninfected_unique	225.171	178.421
chr11	85913178	85913402	112	-0.03641	8.44852	0.014236	Uninfected_unique	344.967	353.784
chr11	86167183	86167421	119	-0.14109	7.36531	0.0149044	Uninfected_unique	157.016	173.147
chr11	86689891	86690120	115	-0.00911	6.87284	0.0259414	Uninfected_unique	116.831	117.572
chr11	87174660	87174835	88	-0.19046	6.90224	0.0151189	Uninfected_unique	111.973	127.776
chr11	87589511	87589696	93	0.0894	6.90983	0.0231994	Uninfected_unique	124.029	116.576
chr11	87749686	87749864	89	-0.0096	6.74362	0.0271132	Uninfected_unique	106.804	107.517
chr11	88285694	88285881	94	-0.43626	6.90108	0.00176266	Uninfected_unique	102.747	139.026
chr11	89597631	89597850	110	-0.43976	7.67941	0.000162878	Uninfected_unique	176.012	238.739
chr11	92616204	92616379	88	-0.31669	7.10638	0.00423717	Uninfected_unique	123.472	153.78
chr11	92619546	92619723	89	0.12332	7.05484	0.0186599	Uninfected_unique	138.765	127.396
chr11	92798604	92798805	101	-0.27043	6.91126	0.00945053	Uninfected_unique	109.596	132.191
chr11	93451432	93451679	124	0.1455	7.03937	0.0178425	Uninfected_unique	138.344	125.072
chr11	93473234	93473465	116	0.32757	8.17243	0.000435485	Uninfected_unique	323.185	257.539
chr11	93654964	93655144	90	-0.13844	6.7285	0.0216394	Uninfected_unique	101.075	111.255
chr11	94356405	94356601	98	0.21177	6.86034	0.0140717	Uninfected_unique	125.038	107.968
chr11	94802930	94803113	92	0.22024	7.32991	0.00844652	Uninfected_unique	173.649	149.064
chr11	94829464	94829698	117	0.49533	7.0994	0.000376996	Uninfected_unique	162.812	115.499
chr11	94840397	94840572	88	-0.2058	7.231	0.0110642	Uninfected_unique	139.885	161.333
chr11	94965399	94965694	148	-0.09237	9.6387	0.00442096	Uninfected_unique	772.031	823.078
chr11	95569242	95569474	116	0.21315	6.83522	0.0140417	Uninfected_unique	122.939	106.053
chr11	95946167	95946375	104	0.4793	7.04091	0.000763143	Uninfected_unique	155.477	111.528
chr11	95976428	95976603	88	-0.36745	7.23942	0.0018885	Uninfected_unique	133.038	171.628
chr11	95991291	95991471	90	0.43891	8.08934	3.23461e-05	Uninfected_unique	317.1	233.922
chr11	96197100	96197327	114	0.12581	7.14735	0.0183705	Uninfected_unique	148.082	135.716
chr11	96197949	96198177	114	0.21333	7.18557	0.0102049	Uninfected_unique	156.741	135.196
chr11	101731518	101731770	126	-0.04583	7.21522	0.0221793	Uninfected_unique	146.251	150.972
chr11	101981595	101981824	115	-0.14295	8.61174	0.00540058	Uninfected_unique	372.285	411.063
chr11	102176698	102176974	138	0.35175	7.73206	0.000818239	Uninfected_unique	240.174	188.208
chr11	102178009	102178226	109	0.33405	7.83189	0.00087258	Uninfected_unique	255.808	202.934
chr11	102189697	102189912	108	0.03731	8.76818	0.0124368	Uninfected_unique	441.673	430.397
chr11	102232311	102232491	90	0.00797	7.24043	0.0228621	Uninfected_unique	151.63	150.795
chr11	102300492	102300770	139	-0.19914	10.031	5.78354e-05	Uninfected_unique	976.455	1120.98
chr11	102365981	102366460	240	0.00299	7.45783	0.0212486	Uninfected_unique	175.987	175.623
chr11	102409954	102410335	191	0.29966	7.25959	0.00431902	Uninfected_unique	170.003	138.118
chr11	102417236	102417449	107	0.41826	7.72541	0.000214975	Uninfected_unique	244.644	183.074
chr11	102417887	102418090	102	0.20012	7.59197	0.00791506	Uninfected_unique	206.791	180.007
chr11	102463801	102463977	88	-0.06646	6.89888	0.0244701	Uninfected_unique	116.618	122.116
chr11	102604046	102604239	97	0.04111	7.23508	0.0223399	Uninfected_unique	152.814	148.521
chr11	102665202	102665450	124	0.018	7.26478	0.0225669	Uninfected_unique	154.748	152.83
chr11	102940935	102941157	111	0.34703	6.73042	0.00563346	Uninfected_unique	119.754	94.151
chr11	103472075	103472266	96	-0.09089	6.77336	0.0240891	Uninfected_unique	106	112.892
chr11	103733284	103733489	103	-0.42419	7.29266	0.000685615	Uninfected_unique	135.351	181.617
chr11	103767943	103768178	118	-0.38869	8.76065	5.32506e-06	Uninfected_unique	379.066	496.275
chr11	103769691	103769947	128	-0.20974	8.79341	0.00133964	Uninfected_unique	412.583	477.144
chr11	103778396	103778590	97	0.20782	7.07963	0.0124621	Uninfected_unique	145.365	125.864
chr11	103830092	103830375	142	-0.00522	6.98886	0.0250072	Uninfected_unique	126.786	127.245
chr11	104085314	104085489	88	0.19965	6.65573	0.0172931	Uninfected_unique	108.05	94.0858
chr11	104202968	104203184	108	-0.03804	6.88598	0.0254019	Uninfected_unique	116.724	119.843
chr11	104817773	104817948	88	-0.00104	6.58001	0.0287537	Uninfected_unique	95.6365	95.7055
chr11	104871620	104871821	101	0.05033	7.18664	0.0223871	Uninfected_unique	148.241	143.159
chr11	105699898	105700073	88	-0.08192	6.58398	0.0261929	Uninfected_unique	93.2492	98.6974
chr11	107787397	107787599	101	-0.14178	7.55624	0.0127345	Uninfected_unique	179.19	197.695
chr11	108033839	108034066	114	0.12165	7.24599	0.0180538	Uninfected_unique	158.333	145.529
chr11	108519094	108519306	106	-0.38541	6.91429	0.00313755	Uninfected_unique	105.536	137.854
chr11	108568700	108568884	92	0.18238	6.81157	0.0161433	Uninfected_unique	119.657	105.447
chr11	108725246	108725425	90	0.093	6.81342	0.0238368	Uninfected_unique	116.156	108.905
chr11	109568060	109568245	93	-0.11474	7.04452	0.0203112	Uninfected_unique	126.865	137.367
chr11	110044966	110045207	121	0.09628	6.99507	0.0213056	Uninfected_unique	131.892	123.377
chr11	110072163	110072347	92	-0.2768	6.8433	0.00920262	Uninfected_unique	104.322	126.387
chr11	110306085	110306288	102	-0.28116	7.18908	0.00555824	Uninfected_unique	132.376	160.86
chr11	111170488	111170790	151	-0.79485	8.48123	2.13718e-14	Uninfected_unique	271.311	470.697
chr11	111217635	111217810	88	-0.22572	8.06937	0.00334144	Uninfected_unique	248.398	290.467
chr11	111223768	111223949	91	-0.29575	8.06129	0.00102953	Uninfected_unique	241.088	295.941
chr11	111270145	111270374	115	-0.12695	8.92998	0.00495658	Uninfected_unique	466.75	509.683
chr11	111270459	111270730	136	-0.12981	8.70802	0.00608919	Uninfected_unique	399.795	437.435
chr11	111586203	111586449	123	-0.13988	7.53506	0.0133861	Uninfected_unique	176.695	194.685
chr11	111648061	111648307	123	-0.28106	8.38522	0.00060161	Uninfected_unique	303.319	368.559
chr11	111712269	111712463	97	0.0193	6.92942	0.0253061	Uninfected_unique	122.707	121.076
chr11	111802596	111802783	94	-0.49934	7.79307	2.57793e-05	Uninfected_unique	186.548	263.697
chr11	111852859	111853054	98	0.00781	7.23562	0.0229376	Uninfected_unique	151.117	150.301
chr11	112046096	112046278	91	-0.23888	7.13584	0.00856847	Uninfected_unique	129.463	152.777
chr11	112050480	112050655	88	0.1132	6.89902	0.0217747	Uninfected_unique	124.122	114.756
chr11	112150715	112150987	136	-0.03668	8.16409	0.0157433	Uninfected_unique	283.214	290.507
chr11	112426530	112426705	88	-0.31373	7.36194	0.00345111	Uninfected_unique	147.552	183.394
chr11	112455506	112455699	97	-0.11965	6.97393	0.0206029	Uninfected_unique	120.602	131.03
chr11	113561686	113561972	143	-0.17923	7.59325	0.00963679	Uninfected_unique	181.476	205.482
chr11	113677223	113677418	98	-0.00746	6.9599	0.0252061	Uninfected_unique	124.17	124.813
chr11	113847673	113847955	141	0.23166	8.26019	0.00228571	Uninfected_unique	332.226	282.942
chr11	114037666	114037913	124	-0.06546	7.69857	0.0177558	Uninfected_unique	203.071	212.497
chr11	114645460	114645637	89	-0.03414	7.1046	0.0236466	Uninfected_unique	136.006	139.263
chr11	115093846	115094142	148	0.3212	8.16888	0.000430776	Uninfected_unique	321.679	257.473
chr11	115094162	115094380	109	0.37946	7.95292	0.000227877	Uninfected_unique	282.606	217.247
chr11	115801076	115801337	131	0.01287	8.21757	0.0162252	Uninfected_unique	299.001	296.345
chr11	116147141	116147326	93	-0.15747	7.96628	0.00861556	Uninfected_unique	236.803	264.114
chr11	116370232	116370416	92	-0.09977	7.44532	0.0173858	Uninfected_unique	168.363	180.419
chr11	116512328	116512529	101	0.00253	7.40317	0.0216836	Uninfected_unique	169.417	169.12
chr11	116562507	116562697	95	0.00175	7.75657	0.019183	Uninfected_unique	216.383	216.121
chr11	116603496	116603699	102	-0.12244	7.72796	0.0132245	Uninfected_unique	203.198	221.196
chr11	116661994	116662301	154	-0.08591	7.98324	0.0141906	Uninfected_unique	245.62	260.691
chr11	116800901	116801145	122	0.59264	7.45825	1.2198e-05	Uninfected_unique	215.952	143.204
chr11	116857638	116857823	93	0.315	6.71261	0.00785862	Uninfected_unique	116.979	94.034
chr11	116967322	116967497	88	0.20633	7.62355	0.00745776	Uninfected_unique	211.823	183.595
chr11	117009450	117009644	97	0.05939	7.56946	0.0188042	Uninfected_unique	193.898	186.078
chr11	117097239	117097421	91	0.08115	7.7238	0.0168077	Uninfected_unique	217.425	205.533
chr11	117350217	117350404	94	-0.37672	7.81862	0.00040678	Uninfected_unique	198.124	257.242
chr11	117714746	117714973	114	-0.08324	7.27696	0.0198517	Uninfected_unique	150.68	159.629
chr11	117817725	117817902	89	-0.20555	7.58923	0.00736285	Uninfected_unique	179.328	206.787
chr11	117821706	117821946	120	0.4494	7.59539	0.000202796	Uninfected_unique	225.986	165.5
chr11	117877974	117878212	119	0.12878	8.60055	0.00650932	Uninfected_unique	405.889	371.228
chr11	117924207	117924409	101	0.36235	7.25263	0.00191323	Uninfected_unique	172.901	134.499
chr11	118016601	118016861	130	0.00555	8.41164	0.0152707	Uninfected_unique	341.186	339.876
chr11	118042431	118042628	99	0.16166	7.65734	0.0103236	Uninfected_unique	213.512	190.878
chr11	118051202	118051416	107	-0.00749	7.33688	0.0221464	Uninfected_unique	161.248	162.087
chr11	118069076	118069275	100	-0.18581	7.12318	0.0133782	Uninfected_unique	130.714	148.682
chr11	118086078	118086298	110	0.04573	7.33973	0.0209531	Uninfected_unique	164.574	159.439
chr11	118281116	118281349	117	0.26549	7.40708	0.00528697	Uninfected_unique	186.086	154.808
chr11	118722734	118723295	281	0.2912	7.87605	0.00160013	Uninfected_unique	259.871	212.372
chr11	118739404	118739625	111	0.50464	8.18299	2.36278e-06	Uninfected_unique	346.164	243.989
chr11	118757544	118757726	91	0.45604	7.91066	4.05153e-05	Uninfected_unique	281.83	205.45
chr11	118785652	118785996	172	0.25536	9.14103	0.000143825	Uninfected_unique	616.822	516.76
chr11	118796937	118797251	157	0.21965	9.32619	0.000266931	Uninfected_unique	692.665	594.843
chr11	118800283	118800514	116	0.26839	9.47972	2.20647e-05	Uninfected_unique	783.568	650.554
chr11	118800979	118801197	109	0.32541	9.05573	1.29976e-05	Uninfected_unique	595.697	475.409
chr11	118936218	118936399	91	-0.10739	7.09892	0.0200752	Uninfected_unique	132.076	142.283
chr11	118965313	118965498	93	0.28015	9.78438	2.22653e-06	Uninfected_unique	971.759	800.249
chr11	118978952	118979190	119	0.04654	8.80249	0.0117682	Uninfected_unique	453.752	439.348
chr11	119015671	119015875	102	-0.08219	7.5332	0.0175909	Uninfected_unique	180.031	190.586
chr11	119026856	119027031	88	-0.07502	7.73423	0.0163197	Uninfected_unique	207.464	218.538
[truncated: 47,746 more rows]

## Sheet: ATAC EBNA2+ vs EBNA2-
chr	start	end	summit	M_value	A_value	P_value	Peak_Group	normalized_read_density_EBNA2+	normalized_read_density_in_EBNA2-
chrY	14301	14495	97	-1.06668	6.33748	5.46363e-07	EBNA2+_unique	55.8753	117.037
chrY	98666	98856	95	-0.21841	6.71189	0.0149821	EBNA2+_unique	97.1866	113.072
chrY	99015	99219	102	0.14117	6.56303	0.0234152	EBNA2+_unique	99.2926	90.0369
chrY	147870	148046	88	0.76363	6.21195	0.000173536	EBNA2+_unique	96.5875	56.8912
chrY	282095	282312	109	0.31538	7.86553	0.00115086	EBNA2+_unique	260.154	209.07
chrY	284424	284611	94	0.5702	7.61273	1.15163e-05	EBNA2+_unique	238.497	160.634
chrY	284971	285150	90	0.49774	7.57917	7.29146e-05	EBNA2+_unique	227.235	160.931
chrY	297241	297815	287	0.34837	7.88476	0.000532934	EBNA2+_unique	266.676	209.466
chrY	901320	901540	110	0.42608	7.71031	0.000206974	EBNA2+_unique	242.754	180.677
chrY	937721	937948	114	1.26071	5.9485	2.59563e-07	EBNA2+_unique	95.5944	39.8952
chrY	1170458	1170759	151	0.62068	5.79809	0.00299139	EBNA2+_unique	68.9955	44.8722
chrY	1274634	1274881	124	0.81295	6.50771	2.22677e-05	EBNA2+_unique	120.608	68.6522
chrY	1284052	1284320	134	0.79038	7.55705	1.32459e-08	EBNA2+_unique	247.664	143.197
chrY	1347798	1347971	87	0.362	7.38332	0.00157696	EBNA2+_unique	189.272	147.27
chrY	1392204	1392411	104	0.01511	5.87937	0.0366479	EBNA2+_unique	59.1754	58.5588
chrY	1526298	1526471	87	0.42267	6.7131	0.00328591	EBNA2+_unique	121.468	90.6205
chrY	1556330	1556695	183	0.26824	6.86004	0.010162	EBNA2+_unique	127.483	105.853
chrY	1560943	1561183	120	-0.4633	6.63573	0.00222721	EBNA2+_unique	84.6877	116.758
chrY	1570200	1570460	130	0.2865	6.70972	0.00967852	EBNA2+_unique	115.598	94.7773
chrY	1650026	1650318	146	0.53652	5.69602	0.00701072	EBNA2+_unique	62.4349	43.0446
chrY	2193249	2193453	102	0.37772	6.32553	0.00801753	EBNA2+_unique	91.417	70.3593
chrY	2193654	2193827	87	0.30422	6.3764	0.0130233	EBNA2+_unique	92.3161	74.7649
chrY	2317566	2317927	181	0.81698	6.18861	9.40376e-05	EBNA2+_unique	96.8111	54.9528
chrY	2359863	2360039	88	0.01269	6.07725	0.0341462	EBNA2+_unique	67.8179	67.224
chrY	2368338	2368521	92	0.34176	6.76209	0.00574545	EBNA2+_unique	122.189	96.4166
chrY	2368889	2369094	103	0.18317	6.86481	0.0161372	EBNA2+_unique	124.189	109.382
chrY	2383040	2383279	120	0.62828	7.26679	1.75047e-05	EBNA2+_unique	191.464	123.867
chrY	2384670	2384985	158	0.97058	6.9079	3.70867e-08	EBNA2+_unique	168.102	85.7824
chrY	2389515	2389740	113	0.79067	6.04687	0.000224416	EBNA2+_unique	86.9555	50.2668
chrY	2461403	2461576	87	-0.03557	5.61215	0.0393927	EBNA2+_unique	48.3139	49.5198
chrY	2497723	2497959	118	0.16214	8.51464	0.00468428	EBNA2+_unique	386.871	345.746
chrY	2569658	2570014	178	0.97215	5.93653	3.68861e-05	EBNA2+_unique	85.7821	43.7271
chrY	4859875	4860077	101	1.76338	5.33688	1.68323e-08	EBNA2+_unique	74.4691	21.9354
chrY	13311864	13312042	89	-1.08445	7.90943	3.2837e-17	EBNA2+_unique	165.101	350.108
chrY	13323944	13324175	116	-1.43764	7.63196	1.34212e-23	EBNA2+_unique	120.521	326.464
chrY	13631163	13631376	107	0.10642	5.83941	0.0347767	EBNA2+_unique	59.4094	55.1848
chrY	13636528	13636818	145	-0.60525	6.2945	0.00106381	EBNA2+_unique	63.6406	96.8127
chrX	69085	69546	231	-0.36259	7.24651	0.00215627	EBNA2+_unique	133.919	172.184
chrX	148723	148951	114	-0.24597	6.62643	0.013702	EBNA2+_unique	90.7261	107.591
chrX	331446	331643	99	0.38937	8.26894	6.29586e-05	EBNA2+_unique	353.025	269.521
chrX	987775	987948	87	1.24812	6.0701	1.30843e-07	EBNA2+_unique	103.548	43.5935
chrX	987967	988140	87	1.17938	6.03001	5.97798e-07	EBNA2+_unique	98.3396	43.421
chrX	1257867	1258040	87	-0.34878	5.91064	0.0143594	EBNA2+_unique	53.3069	67.8854
chrX	1324720	1324911	96	0.49965	6.43132	0.00233379	EBNA2+_unique	102.618	72.5797
chrX	1324953	1325191	119	0.4021	6.49052	0.00528954	EBNA2+_unique	103.363	78.2202
chrX	1326575	1326755	90	0.26797	6.64396	0.011485	EBNA2+_unique	109.74	91.1376
chrX	1333248	1333474	113	0.71389	6.9248	1.45285e-05	EBNA2+_unique	155.605	94.8684
chrX	1358660	1358886	113	-0.12417	6.17561	0.0293122	EBNA2+_unique	69.2396	75.4629
chrX	1368488	1368756	134	0.82178	5.99185	0.000195281	EBNA2+_unique	84.609	47.867
chrX	1442194	1442462	134	0.36212	6.07161	0.0118114	EBNA2+_unique	76.2502	59.3242
chrX	1449390	1449623	117	-0.15477	6.08371	0.02703	EBNA2+_unique	64.2812	71.5607
chrX	1511441	1511762	161	0.35336	8.39641	9.53737e-05	EBNA2+_unique	380.853	298.116
chrX	1586135	1586431	148	0.2548	7.25927	0.00695611	EBNA2+_unique	167.344	140.251
chrX	1606345	1606633	144	0.06246	6.7339	0.0257538	EBNA2+_unique	108.769	104.161
chrX	1612896	1613381	243	0.5394	7.17628	0.000161354	EBNA2+_unique	174.367	119.974
chrX	1620181	1620461	140	0.41965	6.78736	0.00271449	EBNA2+_unique	127.75	95.507
chrX	1653463	1653678	108	0.25213	7.5892	0.00454845	EBNA2+_unique	210.148	176.452
chrX	1656369	1656542	87	0.25593	7.35369	0.00613582	EBNA2+_unique	178.732	149.679
chrX	1700015	1700339	162	0.72057	5.84325	0.00105987	EBNA2+_unique	73.6971	44.7236
chrX	1780212	1780433	111	-0.53415	6.4286	0.00163814	EBNA2+_unique	71.582	103.657
chrX	2243264	2243452	94	0.11629	6.43994	0.0263083	EBNA2+_unique	90.3896	83.3896
chrX	2243614	2243802	94	0.23601	6.48716	0.0172701	EBNA2+_unique	97.3538	82.6621
chrX	2367615	2367870	128	0.29057	6.2031	0.0169428	EBNA2+_unique	81.4806	66.6168
chrX	2409825	2410016	96	1.00736	5.80077	3.86254e-05	EBNA2+_unique	79.0367	39.3172
chrX	2418259	2418570	156	0.51503	6.74561	0.00098206	EBNA2+_unique	128.278	89.7659
chrX	2418744	2419118	187	0.21899	6.94412	0.0122384	EBNA2+_unique	132.846	114.137
chrX	2427293	2427513	110	1.53056	5.84897	3.68991e-09	EBNA2+_unique	97.9688	33.9112
chrX	2433023	2433262	120	0.88192	7.25433	1.35262e-08	EBNA2+_unique	207.259	112.468
chrX	2434720	2434987	134	0.58798	6.99029	0.000134343	EBNA2+_unique	155.879	103.702
chrX	2439495	2439732	119	0.8966	6.22393	2.62989e-05	EBNA2+_unique	101.986	54.782
chrX	2619598	2619892	147	1.17543	5.98582	9.91222e-07	EBNA2+_unique	95.2426	42.1688
chrX	2730559	2730747	94	-0.1623	6.00185	0.0290327	EBNA2+_unique	60.5771	67.79
chrX	2953880	2954063	92	0.49743	5.71313	0.00844473	EBNA2+_unique	62.3296	44.1523
chrX	3734143	3734681	269	0.32168	8.31854	0.000311477	EBNA2+_unique	356.901	285.57
chrX	3760971	3761144	87	0.3657	7.50651	0.00115765	EBNA2+_unique	206.409	160.192
chrX	3761306	3761560	127	0.44313	7.88416	7.97913e-05	EBNA2+_unique	275.465	202.615
chrX	4158706	4158990	142	0.66255	8.19682	3.10932e-09	EBNA2+_unique	369.158	233.22
chrX	4171217	4171451	117	0.9006	5.66237	0.000299942	EBNA2+_unique	69.1985	37.0672
chrX	4465373	4465546	87	0.26464	5.69172	0.0242234	EBNA2+_unique	56.6514	47.157
chrX	5599306	5599519	107	0.78764	5.80158	0.000560613	EBNA2+_unique	73.2827	42.452
chrX	6047911	6048140	115	0.68101	6.53707	0.000140663	EBNA2+_unique	117.586	73.3419
chrX	6108831	6109005	87	0.47845	5.91188	0.00703949	EBNA2+_unique	71.0669	51.0081
chrX	6141672	6141845	87	0.34884	6.2999	0.0101962	EBNA2+_unique	88.9129	69.8157
chrX	6144851	6145051	100	0.24814	8.16987	0.00190983	EBNA2+_unique	313.852	264.257
chrX	6562560	6562740	90	0.04863	5.6496	0.0390143	EBNA2+_unique	51.0527	49.3605
chrX	6636947	6637120	87	0.59157	5.48217	0.00578098	EBNA2+_unique	54.8704	36.4131
chrX	6650191	6650386	98	0.8632	5.95251	0.00013026	EBNA2+_unique	83.5235	45.9155
chrX	6657543	6657736	97	0.67024	8.44101	1.05234e-10	EBNA2+_unique	438.408	275.496
chrX	6770954	6771221	134	0.79572	6.33455	6.9072e-05	EBNA2+_unique	106.33	61.2522
chrX	6966125	6966314	95	0.95015	5.12203	0.00122898	EBNA2+_unique	48.4057	25.0538
chrX	6973897	6974095	99	0.37597	6.09984	0.0105345	EBNA2+_unique	78.1311	60.2068
chrX	6987072	6987334	131	0.69414	6.29535	0.000358103	EBNA2+_unique	99.9005	61.7463
chrX	6989619	6989792	87	0.64554	5.64831	0.00301829	EBNA2+_unique	62.7298	40.1003
chrX	7001138	7001357	110	0.40344	8.26881	3.63864e-05	EBNA2+_unique	354.718	268.186
chrX	7050582	7050755	87	-0.01308	6.06222	0.0343991	EBNA2+_unique	66.5183	67.1242
chrX	7065129	7065328	100	0.30681	8.40939	0.000344223	EBNA2+_unique	378.145	305.703
chrX	7108301	7108539	119	0.65201	6.2608	0.000637775	EBNA2+_unique	96.1227	61.1718
chrX	7109642	7109925	142	0.50365	6.52552	0.00158505	EBNA2+_unique	109.694	77.3696
chrX	7109973	7110172	100	0.51915	6.52641	0.00158505	EBNA2+_unique	110.353	77.0026
chrX	7141383	7141590	104	1.56187	6.29392	4.00675e-12	EBNA2+_unique	134.817	45.664
chrX	7144796	7144969	87	1.29108	5.74367	7.20357e-07	EBNA2+_unique	83.8193	34.2523
chrX	7149704	7150106	201	0.74814	7.2061	1.27482e-06	EBNA2+_unique	191.363	113.932
chrX	7150196	7150412	108	0.6318	7.18484	2.32064e-05	EBNA2+_unique	181.112	116.885
chrX	7179664	7179994	165	0.27294	6.33311	0.0142527	EBNA2+_unique	88.6212	73.3457
chrX	7181053	7181281	114	0.16496	6.07408	0.02862	EBNA2+_unique	71.3361	63.6285
chrX	7894009	7894182	87	0.32487	6.51609	0.00994236	EBNA2+_unique	102.432	81.7788
chrX	7964565	7964747	91	0.2608	5.62692	0.0266609	EBNA2+_unique	54.0911	45.1458
chrX	8706775	8706948	87	0.57909	5.36215	0.00954102	EBNA2+_unique	50.2724	33.6516
chrX	8711254	8711456	101	0.42641	5.86989	0.00934466	EBNA2+_unique	67.7944	50.4466
chrX	8723245	8723447	101	1.0172	5.65061	8.03869e-05	EBNA2+_unique	71.4672	35.3101
chrX	8847905	8848079	87	0.67339	5.57598	0.00341746	EBNA2+_unique	60.2411	37.773
chrX	8955776	8956010	117	-0.20505	6.76439	0.0150357	EBNA2+_unique	101.256	116.721
chrX	9281281	9281573	146	-0.036	6.38811	0.0303717	EBNA2+_unique	82.7169	84.8069
chrX	9309624	9310271	324	0.26986	7.33886	0.00505301	EBNA2+_unique	177.76	147.434
chrX	9319859	9320032	87	-0.78855	6.20027	0.000128462	EBNA2+_unique	55.9472	96.6398
chrX	9432151	9432325	87	0.28769	8.44708	0.000458704	EBNA2+_unique	385.59	315.88
chrX	9450939	9451206	134	0.15087	6.25349	0.026206	EBNA2+_unique	80.3889	72.4069
chrX	9493949	9494324	188	0.84898	6.26172	4.01903e-05	EBNA2+_unique	102.979	57.1717
chrX	9498901	9499149	124	0.30612	6.394	0.0118264	EBNA2+_unique	93.5107	75.6328
chrX	9677036	9677299	132	-0.15565	6.66724	0.0207858	EBNA2+_unique	96.2967	107.267
chrX	9842081	9842303	111	0.52156	6.15442	0.00318522	EBNA2+_unique	85.343	59.4515
chrX	9853255	9853530	138	0.61536	6.35551	0.000783247	EBNA2+_unique	101.349	66.1574
chrX	9963879	9964147	134	0.18745	6.52571	0.0198963	EBNA2+_unique	98.3215	86.3417
chrX	10010174	10010413	120	0.27867	6.31103	0.0156214	EBNA2+_unique	87.4487	72.0884
chrX	10050992	10051207	108	0.27793	6.79675	0.00995718	EBNA2+_unique	122.422	100.97
chrX	10051374	10051549	88	0.4404	6.76533	0.00194465	EBNA2+_unique	126.723	93.3857
chrX	10053375	10053588	107	0.38083	5.96717	0.012912	EBNA2+_unique	71.3868	54.8247
chrX	10087513	10087729	108	0.29937	7.29488	0.00444715	EBNA2+_unique	174.196	141.553
chrX	10157537	10157923	193	0.02599	6.48884	0.0293678	EBNA2+_unique	90.6249	89.0069
chrX	10167288	10167587	150	0.00032	6.26423	0.0320955	EBNA2+_unique	76.8722	76.8551
chrX	10566000	10566186	93	0.52971	5.62337	0.00793454	EBNA2+_unique	59.2287	41.0274
chrX	10584062	10584244	91	0.6069	5.47546	0.00578098	EBNA2+_unique	54.9067	36.0521
chrX	10690876	10691107	116	0.10543	5.94209	0.0324552	EBNA2+_unique	63.77	59.276
chrX	10693220	10693408	94	0.47154	5.61726	0.0111461	EBNA2+_unique	57.8013	41.686
chrX	10737318	10737513	98	1.00777	5.62869	0.000107688	EBNA2+_unique	70.1599	34.8915
chrX	11162475	11162678	102	0.38461	6.08473	0.0091604	EBNA2+_unique	77.5489	59.4014
chrX	11369173	11369349	88	0.85902	5.91079	0.000201054	EBNA2+_unique	81.0253	44.6714
chrX	11399654	11399862	104	0.67773	6.0963	0.000699731	EBNA2+_unique	86.5322	54.0954
chrX	11441511	11441754	122	1.06643	5.93634	6.70863e-06	EBNA2+_unique	88.6197	42.3158
chrX	11561439	11561614	88	0.54353	5.23837	0.0106166	EBNA2+_unique	45.5739	31.2678
chrX	11577169	11577400	116	0.45397	6.20436	0.00555603	EBNA2+_unique	86.3034	63.0042
chrX	11788463	11788715	126	0.03011	6.53296	0.0289018	EBNA2+_unique	93.5726	91.64
chrX	11805670	11805901	116	0.75243	5.9008	0.000568246	EBNA2+_unique	77.5479	46.0326
chrX	11842941	11843369	214	1.23282	6.20642	4.68788e-08	EBNA2+_unique	113.208	48.1682
chrX	11926587	11926801	107	1.21592	5.57646	6.90726e-06	EBNA2+_unique	72.727	31.3089
chrX	12515854	12516288	217	0.43358	6.54846	0.00368488	EBNA2+_unique	108.779	80.542
chrX	12533586	12533860	137	0.68613	6.46097	0.00017556	EBNA2+_unique	111.743	69.4501
chrX	12788661	12788867	103	0.4789	7.04319	0.00065552	EBNA2+_unique	155.702	111.72
chrX	12832627	12832888	131	0.35082	6.14422	0.0121806	EBNA2+_unique	79.8727	62.6312
chrX	12862097	12862313	108	1.00127	6.22831	4.11454e-06	EBNA2+_unique	106.075	52.991
chrX	12883698	12883990	146	0.20229	7.1847	0.0117807	EBNA2+_unique	156.048	135.632
chrX	12906669	12906842	87	0.62058	6.99656	7.35023e-05	EBNA2+_unique	158.336	102.984
chrX	12907455	12907688	117	0.6496	6.89419	6.32334e-05	EBNA2+_unique	148.982	94.9694
chrX	12919699	12919898	100	-0.48328	6.2943	0.00320195	EBNA2+_unique	66.3792	92.7927
chrX	12964970	12965174	102	-0.02286	6.55614	0.0287513	EBNA2+_unique	93.3585	94.8496
chrX	12988787	12989008	111	0.84007	6.29885	4.68674e-05	EBNA2+_unique	105.338	58.8437
chrX	12992635	12992915	140	0.27135	8.46146	0.000691328	EBNA2+_unique	387.254	320.857
chrX	12994135	12994363	114	0.28641	7.8725	0.00176286	EBNA2+_unique	258.802	212.202
chrX	13017658	13017835	89	0.80918	7.19986	2.00746e-07	EBNA2+_unique	194.611	111.066
chrX	13023794	13024137	172	0.72751	6.72766	3.23474e-05	EBNA2+_unique	136.373	82.3619
chrX	13031957	13032164	104	0.54128	6.04984	0.00339892	EBNA2+_unique	79.9197	54.9177
chrX	13099815	13100109	147	1.1133	6.58883	1.26756e-08	EBNA2+_unique	141.581	65.4436
chrX	13103727	13103986	130	1.2129	6.20741	7.74936e-08	EBNA2+_unique	112.506	48.5352
chrX	13212519	13212703	92	1.18238	5.74693	5.53983e-06	EBNA2+_unique	80.9029	35.6478
chrX	13272646	13272844	99	1.23563	6.29436	1.99793e-08	EBNA2+_unique	120.44	51.1458
chrX	13363062	13363552	245	1.58144	6.64541	2.99165e-15	EBNA2+_unique	173.18	57.8678
chrX	13481817	13482101	142	0.32296	5.83278	0.0178895	EBNA2+_unique	63.7459	50.9602
chrX	13491785	13492023	119	1.44751	6.35672	5.13664e-11	EBNA2+_unique	135.343	49.624
chrX	13505101	13505427	163	1.38963	7.21208	3.50527e-17	EBNA2+_unique	240.001	91.5993
chrX	13505458	13505727	135	1.50671	7.43469	7.82821e-23	EBNA2+_unique	291.64	102.632
chrX	13506340	13506580	120	1.2988	6.89731	8.59524e-13	EBNA2+_unique	186.976	75.9991
chrX	13676804	13677016	106	0.33662	5.28611	0.0269405	EBNA2+_unique	43.8474	34.7225
chrX	13709894	13710208	157	0.90952	6.81814	2.96319e-07	EBNA2+_unique	154.654	82.3319
chrX	13739899	13740103	102	0.97749	6.27109	5.09667e-06	EBNA2+_unique	108.371	55.0376
chrX	13740378	13740630	126	0.6266	6.47939	0.000457527	EBNA2+_unique	110.867	71.8089
chrX	13768425	13768598	87	0.2253	5.7409	0.0264337	EBNA2+_unique	57.8221	49.462
chrX	13770917	13771117	100	0.68819	5.55402	0.00265028	EBNA2+_unique	59.6361	37.0121
chrX	14057544	14057728	92	0.39449	5.98595	0.00998369	EBNA2+_unique	72.6653	55.2807
chrX	14113865	14114107	121	0.52049	6.30019	0.00272507	EBNA2+_unique	94.3817	65.7968
chrX	14515574	14515795	111	1.05827	5.65814	4.41853e-05	EBNA2+_unique	72.8711	34.9933
chrX	14715665	14715908	122	0.31484	6.1709	0.0152843	EBNA2+_unique	80.3552	64.6008
chrX	15068608	15068821	107	0.1413	6.21375	0.0277095	EBNA2+_unique	77.9458	70.6736
chrX	15483531	15483794	132	0.59095	6.17436	0.00156469	EBNA2+_unique	88.6369	58.8465
chrX	15484463	15484636	87	0.1648	6.52701	0.0211541	EBNA2+_unique	97.6406	87.1005
chrX	15486195	15486368	87	0.30358	5.5736	0.024232	EBNA2+_unique	52.9071	42.8674
chrX	15489174	15489422	124	0.42637	6.22651	0.00660654	EBNA2+_unique	86.8043	64.5939
chrX	15516113	15516294	91	0.19661	6.12066	0.0252873	EBNA2+_unique	74.4895	64.9994
chrX	15583440	15583685	123	0.77059	5.94949	0.000377929	EBNA2+_unique	80.7161	47.314
chrX	15665755	15665961	103	0.0237	6.48045	0.0296941	EBNA2+_unique	90.0279	88.561
chrX	15705272	15705488	108	0.28055	5.80804	0.0220078	EBNA2+_unique	61.7478	50.8355
chrX	15722067	15722261	97	0.08285	6.3361	0.0297965	EBNA2+_unique	83.1431	78.5029
chrX	15800566	15800830	132	1.0345	6.58112	1.41051e-07	EBNA2+_unique	137.032	66.897
chrX	15834249	15834492	122	-0.19283	6.08657	0.0253637	EBNA2+_unique	63.5647	72.6547
chrX	15991524	15991780	128	0.41986	6.27849	0.00592459	EBNA2+_unique	89.7861	67.1148
chrX	16125443	16125671	114	0.54168	6.09321	0.00358107	EBNA2+_unique	82.3702	56.5859
chrX	16156246	16156444	99	0.98154	5.80054	7.62852e-05	EBNA2+_unique	78.3201	39.6643
chrX	16454780	16455015	118	-0.20093	6.09011	0.0253637	EBNA2+_unique	63.5423	73.038
chrX	16713295	16713504	105	-0.15289	6.31995	0.0258118	EBNA2+_unique	75.7674	84.2378
chrX	16854668	16854845	89	0.0721	5.94256	0.0346189	EBNA2+_unique	63.0581	59.9842
chrX	16891369	16891578	105	0.83304	7.10114	2.91957e-07	EBNA2+_unique	183.249	102.866
chrX	16901391	16901654	132	0.7023	8.01386	4.12418e-09	EBNA2+_unique	329.7	202.631
chrX	17025322	17025501	90	0.39242	5.88476	0.0125793	EBNA2+_unique	67.6946	51.5732
chrX	17036510	17036875	183	0.89192	6.03275	7.02015e-05	EBNA2+_unique	89.1838	48.0608
chrX	17043063	17043351	144	0.9466	6.18487	1.15561e-05	EBNA2+_unique	100.997	52.4027
chrX	17064729	17064967	119	0.71463	6.21523	0.000361839	EBNA2+_unique	95.1773	57.9973
chrX	17260714	17260887	87	-0.18217	6.02514	0.0273497	EBNA2+_unique	61.1404	69.3693
chrX	17708328	17708514	93	0.43851	5.67878	0.0114782	EBNA2+_unique	59.6328	44.0029
chrX	17806638	17806821	92	-0.13331	6.24121	0.0275853	EBNA2+_unique	72.2314	79.224
chrX	17941811	17942014	102	0.69969	5.7503	0.0014122	EBNA2+_unique	68.6004	42.2376
chrX	17963317	17963493	88	0.52466	5.71581	0.00717132	EBNA2+_unique	63.0376	43.8189
chrX	18395982	18396216	117	-0.29643	6.41645	0.0118878	EBNA2+_unique	77.0773	94.6588
chrX	18442731	18442937	103	0.39199	8.90677	1.79539e-06	EBNA2+_unique	549.801	418.991
chrX	18874434	18874609	88	1.36587	5.51084	1.36397e-06	EBNA2+_unique	73.2002	28.4017
chrX	18903807	18904066	130	0.89169	7.46885	1.03063e-09	EBNA2+_unique	241.302	130.057
chrX	18904484	18904868	192	0.62457	7.60474	2.22778e-06	EBNA2+_unique	241.692	156.764
chrX	19352315	19352684	185	0.38213	7.15571	0.00191738	EBNA2+_unique	162.779	124.901
chrX	19353175	19353498	162	0.3227	7.13706	0.00434897	EBNA2+_unique	157.413	125.863
chrX	19390384	19390976	296	0.03126	7.08001	0.0238144	EBNA2+_unique	136.773	133.841
chrX	19400935	19401205	135	0.40927	6.45415	0.00514442	EBNA2+_unique	101.04	76.0837
chrX	19544347	19544692	173	0.93935	6.30367	8.22513e-06	EBNA2+_unique	109.391	57.0437
chrX	19697107	19697332	113	0.3772	5.57598	0.0192959	EBNA2+_unique	54.364	41.8565
chrX	19754610	19754809	100	0.27662	6.06182	0.0183948	EBNA2+_unique	73.5233	60.6952
chrX	19757893	19758076	92	0.2774	5.63661	0.0242371	EBNA2+_unique	54.7698	45.1893
chrX	19761615	19761894	140	0.68358	6.80038	5.55295e-05	EBNA2+_unique	141.256	87.9487
chrX	19768677	19768883	103	0.68777	7.21172	5.60216e-06	EBNA2+_unique	188.132	116.795
chrX	19776710	19776984	137	0.09981	6.36942	0.0277576	EBNA2+_unique	85.5873	79.8663
chrX	19795433	19795714	141	0.74297	7.59615	6.71284e-08	EBNA2+_unique	250.321	149.569
chrX	19810643	19810854	106	0.89181	5.98208	7.70332e-05	EBNA2+_unique	86.1026	46.4039
chrX	19819863	19820076	107	-0.14713	6.8631	0.0191743	EBNA2+_unique	110.625	122.502
chrX	19830042	19830275	117	0.68495	6.00893	0.000926188	EBNA2+_unique	81.6514	50.7894
chrX	19859013	19859450	219	0.4021	6.49052	0.00528954	EBNA2+_unique	103.363	78.2202
chrX	19867637	19867902	133	0.72319	7.0306	7.22956e-06	EBNA2+_unique	167.986	101.758
chrX	19867998	19868238	120	0.67788	7.09276	1.23991e-05	EBNA2+_unique	172.649	107.92
chrX	19875166	19875478	156	0.23269	6.3012	0.0201395	EBNA2+_unique	85.4818	72.749
chrX	19882940	19883154	107	0.32031	7.25846	0.00348553	EBNA2+_unique	171.09	137.026
chrX	19887385	19887594	105	0.22327	6.20004	0.0218182	EBNA2+_unique	79.4335	68.0444
chrX	19893195	19893549	177	-0.07558	6.93115	0.0237061	EBNA2+_unique	118.88	125.274
chrX	19902028	19902351	162	1.26693	6.96245	9.00709e-13	EBNA2+_unique	193.463	80.3923
chrX	19922988	19923233	123	-0.44013	6.15246	0.0062138	EBNA2+_unique	61.0701	82.8555
chrX	20085356	20085589	117	0.43384	6.50099	0.00403327	EBNA2+_unique	105.267	77.928
chrX	20145670	20145850	90	0.3915	5.9625	0.0112724	EBNA2+_unique	71.4197	54.4458
chrX	20271126	20271391	133	0.51181	6.17905	0.00334828	EBNA2+_unique	86.5196	60.6798
chrX	20283427	20283606	90	0.49797	7.28636	0.000187928	EBNA2+_unique	185.509	131.359
chrX	20333293	20333594	151	0.39702	6.35422	0.00627038	EBNA2+_unique	93.879	71.2941
chrX	20460803	20461013	105	0.52138	6.1338	0.00376033	EBNA2+_unique	84.1266	58.6114
chrX	21456986	21457279	147	1.12084	6.2631	3.22216e-07	EBNA2+_unique	113.262	52.0808
chrX	21498042	21498292	125	0.94612	5.71979	0.000145225	EBNA2+_unique	73.1532	37.9685
chrX	22099690	22099892	101	0.68911	5.95147	0.00104123	EBNA2+_unique	78.5764	48.736
chrX	22210874	22211091	109	0.42641	5.86989	0.00934466	EBNA2+_unique	67.7944	50.4466
chrX	22684617	22684888	136	0.54048	6.00509	0.00382757	EBNA2+_unique	77.4573	53.2552
chrX	22704234	22704676	221	1.44965	6.21496	2.32338e-10	EBNA2+_unique	122.768	44.9464
chrX	22766630	22766873	122	0.85603	6.30816	2.82952e-05	EBNA2+_unique	106.608	58.8979
chrX	23336295	23336672	189	0.26916	6.65856	0.0115294	EBNA2+_unique	110.902	92.0267
chrX	23712755	23712942	94	0.09833	5.78058	0.0353118	EBNA2+_unique	56.8759	53.1285
chrX	23774300	23774516	108	0.25959	5.87462	0.0240636	EBNA2+_unique	64.1962	53.6247
chrX	23785417	23785756	170	0.38033	6.96185	0.0028811	EBNA2+_unique	142.223	109.265
chrX	23791721	23791976	128	0.5071	6.45274	0.00198597	EBNA2+_unique	104.423	73.4754
chrX	23799691	23799866	88	0.92462	6.37922	4.82332e-06	EBNA2+_unique	114.685	60.4181
chrX	23920029	23920273	122	0.78945	6.65103	1.3899e-05	EBNA2+_unique	132.125	76.4426
chrX	23920680	23920853	87	0.81816	6.65103	1.09207e-05	EBNA2+_unique	133.446	75.6858
chrX	23926830	23927026	98	0.17789	8.90987	0.0019868	EBNA2+_unique	511.58	452.234
chrX	24071662	24071837	88	0.29561	8.49683	0.000340278	EBNA2+_unique	400.216	326.067
chrX	24187434	24187607	87	0.58503	5.98559	0.00260079	EBNA2+_unique	77.6065	51.7352
chrX	24389553	24389776	112	0.12803	6.05255	0.0302695	EBNA2+_unique	69.3856	63.4934
chrX	24497311	24497496	93	0.56631	7.45532	2.19156e-05	EBNA2+_unique	213.557	144.224
chrX	24665410	24665716	153	0.47333	6.49969	0.00255182	EBNA2+_unique	106.622	76.7995
chrX	25039061	25039291	115	-0.19936	6.7455	0.0161365	EBNA2+_unique	100.136	114.975
chrX	25446056	25446229	87	0.08453	5.87906	0.0342648	EBNA2+_unique	60.6033	57.1545
chrX	25541787	25542001	107	0.75561	5.97801	0.000538113	EBNA2+_unique	81.9013	48.5098
chrX	25987226	25987416	95	0.14349	6.03296	0.0288936	EBNA2+_unique	68.8176	62.3024
chrX	26669986	26670183	99	0.71697	5.35712	0.00323688	EBNA2+_unique	52.5495	31.9697
chrX	26671804	26671988	92	0.3132	6.09302	0.0150321	EBNA2+_unique	76.0892	61.2407
chrX	26801704	26801954	125	0.51881	6.3634	0.00211381	EBNA2+_unique	98.5514	68.7837
chrX	26936813	26937017	102	0.52156	6.15442	0.00318522	EBNA2+_unique	85.343	59.4515
chrX	27354730	27354924	97	0.84259	5.28398	0.00168099	EBNA2+_unique	52.1746	29.0947
chrX	27417106	27417285	90	0.05446	5.49381	0.0410239	EBNA2+_unique	45.9197	44.2186
chrX	27573736	27573942	103	0.35912	5.89934	0.0143594	EBNA2+_unique	67.5976	52.7018
chrX	27702023	27702214	96	1.14371	6.03657	9.64629e-07	EBNA2+_unique	97.574	44.1614
chrX	28568681	28568869	94	0.35202	5.40368	0.0213097	EBNA2+_unique	47.8249	37.4701
chrX	30160135	30160351	108	0.19593	5.81536	0.0302008	EBNA2+_unique	60.2682	52.6147
chrX	30612004	30612256	126	0.26038	5.92918	0.0220245	EBNA2+_unique	66.6887	55.6762
chrX	30615754	30616180	213	0.80811	6.49572	2.64367e-05	EBNA2+_unique	119.41	68.1984
chrX	30731206	30731384	89	0.32951	5.74178	0.0197581	EBNA2+_unique	59.9852	47.7366
chrX	30753999	30754227	114	0.06665	5.95906	0.0343617	EBNA2+_unique	63.6631	60.7889
chrX	30830196	30830403	104	0.78158	6.87942	5.41984e-06	EBNA2+_unique	154.366	89.7992
chrX	30840269	30840484	108	0.94629	6.21914	1.40431e-05	EBNA2+_unique	103.414	53.6682
chrX	30840526	30840746	110	1.03323	6.03866	8.07114e-06	EBNA2+_unique	94.0447	45.9517
chrX	30883243	30883452	105	0.56867	5.78076	0.00435821	EBNA2+_unique	66.9538	45.1428
chrX	30989945	30990144	100	0.80962	5.99718	0.000195281	EBNA2+_unique	84.5651	48.2471
chrX	31154350	31154591	121	0.17262	6.39629	0.0228584	EBNA2+_unique	89.4246	79.3402
chrX	32264867	32265122	128	-0.12147	6.06914	0.0301039	EBNA2+_unique	64.3739	70.0287
chrX	32462057	32462257	100	1.86136	6.04186	5.29717e-14	EBNA2+_unique	125.587	34.5636
chrX	33154188	33154421	117	0.46487	5.89232	0.0081935	EBNA2+_unique	69.7806	50.5586
chrX	33452516	33452949	217	0.76991	6.32955	0.000118091	EBNA2+_unique	105.019	61.5887
chrX	35399001	35399200	100	0.55954	5.479	0.00859335	EBNA2+_unique	54.1455	36.7387
chrX	35908913	35909113	100	0.50439	5.95006	0.00522562	EBNA2+_unique	73.6317	51.9073
chrX	36926949	36927156	104	1.53311	5.37221	3.69331e-07	EBNA2+_unique	70.4616	24.3467
chrX	37079197	37079385	94	0.10198	6.13824	0.0307109	EBNA2+_unique	72.9699	67.99
chrX	37368632	37368844	106	0.44707	5.95062	0.00845427	EBNA2+_unique	72.2114	52.9693
chrX	37604717	37604925	104	0.4496	6.50211	0.00350058	EBNA2+_unique	105.926	77.5637
chrX	37635854	37636157	152	1.44358	6.67154	2.82821e-13	EBNA2+_unique	168.118	61.8092
chrX	37645824	37646204	190	0.84372	7.30841	2.91127e-08	EBNA2+_unique	212.346	118.32
chrX	37646337	37646539	101	0.75781	7.34232	3.30118e-07	EBNA2+_unique	211.018	124.795
chrX	37672325	37672498	87	0.8239	6.10167	0.000158492	EBNA2+_unique	91.3682	51.615
chrX	37684514	37684767	127	0.4574	6.50666	0.0030262	EBNA2+_unique	106.548	77.5987
chrX	38051335	38051542	104	0.3831	5.90207	0.0125793	EBNA2+_unique	68.2908	52.3646
chrX	38064364	38064609	123	0.24808	6.02526	0.021987	EBNA2+_unique	70.978	59.7646
chrX	38119582	38119755	87	0.05798	5.57121	0.0397822	EBNA2+_unique	48.5097	46.5988
chrX	38486981	38487253	136	0.76728	6.24593	0.000146341	EBNA2+_unique	99.0146	58.1735
chrX	38664352	38664530	89	0.24712	8.85985	0.000421419	EBNA2+_unique	506.146	426.467
chrX	38664836	38665278	221	0.46806	8.40914	1.93754e-06	EBNA2+_unique	399.81	289.037
chrX	38676379	38676598	110	0.81004	5.82838	0.00047026	EBNA2+_unique	75.2385	42.9135
chrX	38750973	38751191	109	0.70309	6.2294	0.000381228	EBNA2+_unique	95.733	58.8045
chrX	38844691	38844935	122	0.71134	5.78445	0.00119174	EBNA2+_unique	70.5278	43.075
chrX	39004247	39004562	158	0.3791	7.49693	0.000881823	EBNA2+_unique	205.997	158.395
chrX	39011465	39011672	104	0.41332	5.86226	0.0107701	EBNA2+_unique	67.1316	50.4087
chrX	39055924	39056157	117	0.56551	6.30764	0.00158753	EBNA2+_unique	96.3622	65.1135
chrX	39099943	39100186	122	0.65964	5.76782	0.00226609	EBNA2+_unique	68.4814	43.3512
chrX	39101570	39101749	90	0.26027	6.03237	0.0201548	EBNA2+_unique	71.6306	59.8067
chrX	39120789	39120994	103	0.98543	5.72734	8.27914e-05	EBNA2+_unique	74.5458	37.6512
chrX	39155816	39156169	177	1.95859	6.80942	1.08058e-24	EBNA2+_unique	221.124	56.8909
chrX	39158975	39159260	143	1.28873	6.72936	1.83877e-11	EBNA2+_unique	165.849	67.8838
chrX	39168463	39168772	155	0.64673	6.08933	0.00106087	EBNA2+_unique	85.1949	54.4162
chrX	39170390	39170579	95	0.26957	6.13507	0.0184815	EBNA2+_unique	77.1639	64.0126
chrX	39196117	39196290	87	0.65914	6.06303	0.00101541	EBNA2+_unique	84.0165	53.2039
chrX	39275940	39276170	115	0.71767	6.0162	0.000569103	EBNA2+_unique	82.9998	50.4704
chrX	39299563	39299811	124	1.43944	6.64835	4.79328e-13	EBNA2+_unique	165.2	60.911
chrX	39301343	39301989	323	1.47953	6.95039	1.58174e-16	EBNA2+_unique	206.522	74.0601
chrX	39350876	39351080	102	0.20599	6.1629	0.0235018	EBNA2+_unique	76.9524	66.7134
chrX	39437558	39437809	126	0.3268	6.18725	0.0123469	EBNA2+_unique	81.6086	65.0668
chrX	39590099	39590278	90	-0.89795	6.1677	3.74989e-05	EBNA2+_unique	52.6633	98.1336
chrX	39673721	39673927	103	-0.32666	5.96657	0.0163705	EBNA2+_unique	55.8405	70.0299
chrX	39714448	39714748	150	0.59491	7.3685	1.80502e-05	EBNA2+_unique	203.087	134.461
chrX	39715036	39715244	104	0.7346	7.14422	3.06395e-06	EBNA2+_unique	182.471	109.662
chrX	39814955	39815158	102	-0.2061	6.19877	0.0218182	EBNA2+_unique	68.3903	78.8927
chrX	39872626	39872932	153	-0.43437	6.99616	0.00151233	EBNA2+_unique	109.818	148.4
chrX	39958405	39958611	103	-0.09879	8.79025	0.00806676	EBNA2+_unique	427.818	458.14
chrX	39958870	39959224	177	-0.00147	8.39696	0.015361	EBNA2+_unique	336.911	337.255
chrX	39964029	39964223	97	-0.09534	8.43177	0.0103511	EBNA2+_unique	334.092	356.916
chrX	39965456	39965953	249	0.11505	8.51354	0.00830339	EBNA2+_unique	380.319	351.167
chrX	39980579	39980851	136	0.7092	6.37242	0.000219279	EBNA2+_unique	105.934	64.7954
chrX	39992012	39992338	163	0.06666	6.96101	0.0240247	EBNA2+_unique	127.499	121.742
chrX	40017528	40017762	117	-0.16369	6.73812	0.0194842	EBNA2+_unique	100.865	112.983
chrX	40025995	40026168	87	0.24217	6.94612	0.0104118	EBNA2+_unique	134.104	113.381
chrX	40433141	40433334	97	-0.16539	6.0606	0.027136	EBNA2+_unique	63.0273	70.6832
chrX	40506134	40506307	87	0.00922	8.39645	0.0153155	EBNA2+_unique	338.042	335.889
chrX	40609156	40609457	151	0.55048	6.7301	0.000665142	EBNA2+_unique	128.475	87.7216
chrX	40869405	40869669	132	0.20299	6.52747	0.0185899	EBNA2+_unique	98.9731	85.9827
chrX	40974240	40974623	192	0.46672	6.06012	0.00672969	EBNA2+_unique	78.438	56.7583
chrX	40976215	40976443	114	0.34382	5.87916	0.0160536	EBNA2+_unique	66.3061	52.246
chrX	41112826	41113233	204	-0.4565	7.11143	0.000749377	EBNA2+_unique	118.044	161.981
chrX	41135032	41135210	89	-0.25529	7.08273	0.00840388	EBNA2+_unique	124.076	148.095
chrX	41136239	41136434	98	-0.04131	7.2605	0.0218454	EBNA2+_unique	151.151	155.541
chrX	41304502	41304723	111	0.21083	6.69904	0.0161236	EBNA2+_unique	111.775	96.5782
chrX	41340640	41340818	89	-0.13476	6.12869	0.0296219	EBNA2+_unique	66.7784	73.3167
chrX	41371727	41372033	153	0.46125	6.74967	0.00190688	EBNA2+_unique	126.264	91.7124
chrX	41579428	41579708	140	0.89579	6.18969	3.14018e-05	EBNA2+_unique	99.5663	53.5122
chrX	41593854	41594064	105	-0.07691	8.25838	0.0130816	EBNA2+_unique	298.156	314.482
chrX	41596381	41596636	128	0.37902	6.22702	0.00985448	EBNA2+_unique	85.4217	65.6858
chrX	42474429	42474720	146	0.64167	6.42602	0.000492223	EBNA2+_unique	107.4	68.8405
chrX	42555929	42556114	93	0.85207	6.1642	6.29518e-05	EBNA2+_unique	96.3515	53.3777
chrX	42574489	42574960	236	1.08272	6.31002	6.52878e-07	EBNA2+_unique	115.47	54.518
chrX	42635617	42635863	123	0.79524	6.08496	0.000255698	EBNA2+_unique	89.4234	51.53
chrX	42728855	42729389	267	1.29338	6.5736	1.66321e-10	EBNA2+_unique	149.116	60.8384
chrX	42793646	42794092	223	0.97254	6.86274	4.74024e-08	EBNA2+_unique	163.032	83.0823
chrX	42815502	42815692	95	0.76846	7.32653	2.89766e-07	EBNA2+_unique	209.493	122.982
chrX	42848036	42848421	193	0.44358	6.70395	0.00208101	EBNA2+_unique	121.578	89.3973
chrX	42859423	42859596	87	0.57637	5.48882	0.00718717	EBNA2+_unique	54.8342	36.7745
chrX	42861819	42861992	87	0.40335	6.5923	0.00441687	EBNA2+_unique	110.966	83.9015
chrX	42862195	42862380	93	0.49517	6.811	0.00111138	EBNA2+_unique	133.305	94.5768
chrX	43208715	43208961	123	0.71312	6.06028	0.000633137	EBNA2+_unique	85.44	52.1184
chrX	43417176	43417349	87	0.29321	5.2608	0.0330876	EBNA2+_unique	42.4415	34.6359
chrX	43609727	43609949	111	0.44691	6.08001	0.00684131	EBNA2+_unique	78.9827	57.9427
chrX	43817773	43817946	87	0.11297	5.60328	0.0370754	EBNA2+_unique	50.5544	46.7468
chrX	44112455	44113052	299	1.01294	6.59667	2.12614e-07	EBNA2+_unique	137.486	68.1291
chrX	44756793	44757223	215	1.14766	7.10733	1.06531e-11	EBNA2+_unique	205.239	92.6359
chrX	44757869	44758321	226	0.64134	7.35961	7.69229e-06	EBNA2+_unique	205.114	131.502
chrX	44765345	44765766	211	0.87931	6.61801	2.90236e-06	EBNA2+_unique	133.22	72.4219
chrX	45046244	45046427	92	0.97636	5.70655	9.94335e-05	EBNA2+_unique	73.2486	37.2294
chrX	46421350	46421523	87	0.42485	7.36805	0.000692005	EBNA2+_unique	191.404	142.58
chrX	46508947	46509182	118	1.25331	5.70456	2.05723e-06	EBNA2+_unique	80.5166	33.7755
chrX	46545574	46545768	97	0.56275	6.07324	0.00238364	EBNA2+_unique	81.8332	55.402
chrX	46552689	46552870	91	0.40533	5.64623	0.0151728	EBNA2+_unique	57.6359	43.5187
chrX	46564448	46564626	89	0.09765	5.98689	0.0320429	EBNA2+_unique	65.6041	61.3106
chrX	46573170	46573380	105	0.19147	6.70751	0.0172753	EBNA2+_unique	111.681	97.8008
chrX	46575816	46576001	93	0.51013	6.08543	0.00422514	EBNA2+_unique	81.0362	56.9003
chrX	46656114	46656332	109	0.06084	6.13196	0.0324913	EBNA2+_unique	71.6244	68.6668
chrX	46819889	46820110	111	0.60901	6.65856	0.000314856	EBNA2+_unique	124.765	81.8015
chrX	46820228	46820445	109	0.63005	6.70171	0.000232288	EBNA2+_unique	129.493	83.6727
chrX	46820686	46820921	118	0.64127	6.71588	0.000156894	EBNA2+_unique	131.281	84.1706
chrX	46838026	46838302	138	0.57294	6.10076	0.00204941	EBNA2+_unique	83.7043	56.2698
chrX	47050860	47051089	115	0.15583	8.79917	0.00367351	EBNA2+_unique	470.185	422.046
chrX	47052412	47052591	90	0.13536	8.7835	0.00494409	EBNA2+_unique	461.818	420.459
chrX	47078402	47078589	94	0.2934	8.92539	8.43307e-05	EBNA2+_unique	538.234	439.187
chrX	47243977	47244193	108	-0.06945	5.86989	0.0354263	EBNA2+_unique	57.09	59.9054
chrX	47351575	47351858	142	0.22128	6.44025	0.0172405	EBNA2+_unique	93.7593	80.4271
chrX	47662678	47662862	92	-0.05865	5.56351	0.0401835	EBNA2+_unique	46.34	48.2626
chrX	47665340	47665523	92	0.01005	6.54174	0.0292126	EBNA2+_unique	93.4916	92.8426
chrX	47695702	47695915	107	0.3974	7.83247	0.000249753	EBNA2+_unique	261.591	198.607
chrX	47818454	47818649	98	-0.25377	6.44132	0.0158794	EBNA2+_unique	79.5856	94.8914
chrX	47880421	47880598	89	0.74114	7.06044	3.13965e-06	EBNA2+_unique	172.567	103.241
chrX	47880644	47881234	295	0.6173	7.12389	4.24976e-05	EBNA2+_unique	172.75	112.614
chrX	47935682	47936144	231	1.05114	6.76146	1.40101e-08	EBNA2+_unique	156.176	75.3685
chrX	47942648	47942891	122	0.73618	6.13039	0.000362838	EBNA2+_unique	90.4144	54.2782
chrX	48326643	48326913	135	-0.24647	7.36064	0.00670471	EBNA2+_unique	150.895	179.007
chrX	48530206	48530560	177	0.67149	7.44837	1.66122e-06	EBNA2+_unique	220.421	138.393
chrX	48817647	48817820	87	-0.07468	6.86778	0.0241307	EBNA2+_unique	113.807	119.853
chrX	48828813	48829037	112	-0.33512	6.8614	0.00552946	EBNA2+_unique	103.525	130.595
chrX	48897498	48897784	143	0.5487	6.95464	0.000315869	EBNA2+_unique	150.018	102.558
chrX	48938108	48938352	122	-0.06554	7.32701	0.0206192	EBNA2+_unique	156.959	164.253
chrX	48957171	48957402	116	0.20869	8.54179	0.00207819	EBNA2+_unique	400.632	346.676
chrX	48963970	48964151	91	0.22645	6.07169	0.021955	EBNA2+_unique	72.752	62.1837
chrX	48998480	48998849	185	-0.26882	6.54072	0.0134943	EBNA2+_unique	84.8187	102.191
chrX	49011694	49011898	102	0.23443	8.42802	0.00157392	EBNA2+_unique	373.57	317.542
chrX	49020442	49020687	123	0.14659	8.23474	0.00732699	EBNA2+_unique	316.933	286.312
chrX	49033931	49034175	122	-0.68927	7.14389	6.2281e-06	EBNA2+_unique	111.373	179.585
chrX	49114511	49114791	140	-0.22331	7.2597	0.00893504	EBNA2+_unique	141.833	165.577
chrX	49148401	49148659	129	-0.41381	6.71818	0.00286844	EBNA2+_unique	91.2198	121.523
chrX	49603116	49603296	90	-0.22699	5.67664	0.0288727	EBNA2+_unique	47.2796	55.3356
chrX	49648924	49649137	107	0.0912	6.20171	0.0301874	EBNA2+_unique	75.9675	71.3138
chrX	49840661	49840875	107	0.33782	6.37094	0.0105027	EBNA2+_unique	93.0446	73.6202
chrX	50434844	50435084	120	0.63342	5.76593	0.00288411	EBNA2+_unique	67.7731	43.6897
chrX	50887750	50887930	90	0.34451	5.62396	0.0194763	EBNA2+_unique	55.5693	43.765
chrX	51568698	51568906	104	1.15165	5.92899	2.27061e-06	EBNA2+_unique	90.8123	40.8755
chrX	51603859	51604056	99	0.26538	5.89984	0.0220275	EBNA2+_unique	65.4595	54.4609
chrX	51634951	51635193	121	0.57781	6.38878	0.00126005	EBNA2+_unique	102.373	68.5876
chrX	52088623	52088834	106	0.14224	6.40959	0.0253365	EBNA2+_unique	89.3075	80.9226
chrX	53019222	53019509	144	0.03964	6.68949	0.0271022	EBNA2+_unique	104.641	101.805
chrX	53101562	53102007	223	0.33623	8.2324	0.000283577	EBNA2+_unique	337.915	267.665
chrX	53117824	53118028	102	-0.09466	6.73227	0.024349	EBNA2+_unique	102.889	109.866
chrX	53268770	53268964	97	0.11952	6.13057	0.0296219	EBNA2+_unique	73.0256	67.2196
chrX	53313895	53314110	108	-0.01122	6.46714	0.02986	EBNA2+_unique	88.1281	88.8161
chrX	53342229	53342403	87	-0.04352	6.16532	0.0327329	EBNA2+_unique	70.6962	72.8613
chrX	53346757	53346996	120	0.35567	6.51084	0.00791527	EBNA2+_unique	103.155	80.6166
chrX	53463034	53463252	109	0.09706	6.05328	0.0314519	EBNA2+_unique	68.6796	64.2111
chrX	53473083	53473256	87	-0.60202	6.08707	0.00163952	EBNA2+_unique	55.1795	83.7536
chrX	53508130	53508303	87	-0.18541	6.26401	0.023241	EBNA2+_unique	72.0689	81.9524
chrX	53710222	53710396	87	0.18912	8.92694	0.00156693	EBNA2+_unique	519.687	455.839
chrX	53731321	53731544	112	-0.02391	5.89645	0.0363425	EBNA2+_unique	59.0758	60.063
chrX	53741521	53742097	288	1.35169	6.97054	4.37028e-14	EBNA2+_unique	200.351	78.504
chrX	53743563	53743790	114	0.61759	6.84084	0.000154731	EBNA2+_unique	141.989	92.5426
chrX	54069277	54069488	106	0.0694	6.97871	0.0233818	EBNA2+_unique	129.195	123.128
chrX	54479428	54479637	105	0.55191	6.13083	0.00261011	EBNA2+_unique	84.8466	57.8753
chrX	54522336	54522514	89	-0.36664	6.69753	0.00483528	EBNA2+_unique	91.4056	117.853
chrX	54522544	54522780	118	-0.26656	6.62618	0.0125315	EBNA2+_unique	90.0653	108.343
chrX	54722350	54722536	93	0.51013	6.08543	0.00422514	EBNA2+_unique	81.0362	56.9003
chrX	54813489	54813669	90	-0.00627	6.24436	0.0323053	EBNA2+_unique	75.6477	75.9772
chrX	54947106	54947434	164	0.61712	7.0818	4.35988e-05	EBNA2+_unique	167.772	109.383
chrX	54947963	54948482	260	0.40075	7.354	0.0008885	EBNA2+_unique	187.972	142.382
chrX	55196250	55196566	158	0.40014	6.78944	0.00310227	EBNA2+_unique	127.073	96.2937
chrX	55369594	55369815	111	-0.18752	6.05618	0.0255159	EBNA2+_unique	62.3544	71.0095
chrX	55453619	55453799	90	-0.08138	5.84314	0.0357082	EBNA2+_unique	55.8099	59.0486
chrX	55516110	55516320	105	0.44397	8.13792	2.1768e-05	EBNA2+_unique	328.535	241.509
chrX	55945782	55946673	446	1.43389	7.16277	7.80058e-18	EBNA2+_unique	235.522	87.1739
chrX	56094495	56095176	341	1.23649	6.72702	8.78217e-11	EBNA2+_unique	162.609	69.012
chrX	56133704	56133877	87	0.83906	5.88585	0.000240153	EBNA2+_unique	79.0876	44.2106
chrX	56275017	56275227	105	0.69293	5.8916	0.00144734	EBNA2+_unique	75.4822	46.693
chrX	56754908	56755084	88	0.7411	7.40737	3.06362e-07	EBNA2+_unique	219.476	131.309
chrX	56790274	56790518	122	0.38961	8.00556	0.000177457	EBNA2+_unique	294.141	224.529
chrX	56791163	56791436	137	0.356	8.00529	0.00033529	EBNA2+_unique	290.68	227.117
chrX	57004667	57004884	109	0.55182	6.02288	0.00330685	EBNA2+_unique	78.7272	53.7045
chrX	57480473	57480706	117	0.63082	5.96555	0.00164515	EBNA2+_unique	77.7602	50.2183
chrX	57936201	57936449	124	0.77312	7.73975	5.43486e-09	EBNA2+_unique	279.424	163.505
chrX	57945199	57945497	149	0.67952	6.33588	0.00039452	EBNA2+_unique	102.228	63.8281
chrX	57945572	57945767	98	0.54459	6.36942	0.00145853	EBNA2+_unique	99.8517	68.4569
chrX	57955915	57956097	91	0.52697	5.94017	0.00431321	EBNA2+_unique	73.7032	51.1508
chrX	58052533	58052719	93	0.4483	5.56182	0.0125862	EBNA2+_unique	55.176	40.4389
chrX	62388945	62389215	135	-0.26467	6.17232	0.0185265	EBNA2+_unique	65.7986	79.0479
chrX	62429101	62429295	97	-0.18535	6.16392	0.0251339	EBNA2+_unique	67.2399	76.458
chrX	62470172	62470447	138	1.16138	6.04687	6.96676e-07	EBNA2+_unique	98.8768	44.2063
chrX	62495096	62495295	100	-0.00451	5.88796	0.0366479	EBNA2+_unique	59.1253	59.3105
chrX	62686639	62686824	93	0.5443	5.80494	0.00448709	EBNA2+_unique	67.5128	46.2952
chrX	63424693	63424889	98	0.47161	8.63195	3.71007e-07	EBNA2+_unique	467.154	336.893
chrX	63790202	63790389	94	0.91118	5.68405	0.000174353	EBNA2+_unique	70.5043	37.4907
chrX	63799930	63800362	216	1.58208	7.37496	5.38882e-24	EBNA2+_unique	287.218	95.9306
chrX	63800420	63800806	193	1.41713	7.44173	1.10762e-20	EBNA2+_unique	284.108	106.386
chrX	64105743	64106011	134	0.04257	6.43393	0.0295139	EBNA2+_unique	87.7432	85.1919
chrX	64195342	64195808	233	0.63858	8.05055	3.4256e-08	EBNA2+_unique	330.806	212.491
chrX	64888464	64888706	121	0.495	8.05726	6.61696e-06	EBNA2+_unique	316.215	224.374
chrX	64915165	64915372	104	0.76291	7.46646	1.07663e-07	EBNA2+_unique	230.387	135.768
chrX	64970631	64970849	109	0.28128	5.86513	0.0220243	EBNA2+_unique	64.2565	52.8741
chrX	65037803	65038123	160	1.19381	6.1192	2.53955e-07	EBNA2+_unique	105.135	45.9596
chrX	65206144	65206336	96	0.50568	5.97354	0.00534262	EBNA2+_unique	74.8733	52.7354
chrX	65231998	65232209	106	0.48311	6.21166	0.00410933	EBNA2+_unique	87.6216	62.6875
chrX	65250843	65251035	96	0.42756	6.09961	0.00695074	EBNA2+_unique	79.528	59.1305
chrX	65330024	65330301	139	0.95977	5.48109	0.000331481	EBNA2+_unique	62.292	32.0267
chrX	65948951	65949126	88	0.66985	5.86545	0.00138243	EBNA2+_unique	73.5358	46.2225
chrX	66775494	66775737	122	0.82259	5.58543	0.00077987	EBNA2+_unique	63.8549	36.1052
chrX	67238529	67238706	89	0.43001	6.00666	0.00754174	EBNA2+_unique	74.629	55.3939
[truncated: 70,229 more rows]

## Sheet: EBNA2-dependent ATAC-seq gains
chr	start	end	Peak
chr1	11466865	11467221	Peak_1
[truncated: 1,546 more rows]

## Sheet: EBNA2-dependent ATAC-seq losses
chr	start	end	Peak
[truncated: 690 more rows]
