# Supplementary material for: Epstein-Barr virus nuclear antigen 2 (EBNA2) extensively rewires the human chromatin landscape at autoimmune risk loci
Source: bioRxiv preprint, doi:10.1101/2020.04.15.043612, version 2 (2021-01-27)
Supplement: Supplemental Table S9 [file 043612_file21.xlsx]

## Sheet: README
Epstein-Barr virus nuclear antigen 2 (EBNA2) extensively rewires the human chromatin landscape at autoimmune risk loci
This file contains differential chromatin looping statistics in Uninfected, EBNA2+ and EBNA2- conditions, as measured by DiffLoop.
Comments, additions, or subtractions should be addressed to the corresponding authors:
Leah Kottyan (Leah.Kottyan@cchmc.org)
Matt Weirauch (Matthew.Weirauch@cchmc.org)
The first tab contains the results for EBNA2- vs uninfected conditions, with fold change and p-value information.
The second tab contains the results for EBNA2+ vs uninfected conditions, with fold change and p-value information.
The third tab contains the results for EBNA2+ vs EBNA2- conditions, with fold change and p-value information.
The fourth tab contains the final EBNA2-dependent chromatin loop gain events (those with p<0.05 and FC >= 1.5) - see Methods.
The fifth tab contains the final EBNA2-dependent chromatin loop loss events (those with p<0.05 and FC >= 1.5) - see Methods.
The columns in all tabs are the same as follows:
chromosome (left)	Chromosome for left anchor of the loop.
start (left)	Starting position for left anchor of the loop.
end (left)	End position for left anchor of the loop.
anchor_length (left)	Length of the left anchor of the loop.
strand (left)	DNA strand of the left anchor of the loop.
chromosome (right)	Chromosome for right anchor of the loop.
start (right)	Starting position for right anchor of the loop.
end (right)	End position for right anchor of the loop.
anchor_length (right)	Length of the right anchor of the loop.
strand (right)	DNA strand of the right anchor of the loop.
loopWidth	Width of the loop.
logFC	Log2 fold change between the groups.
logCPM	The average log2-counts-per-million.
LR	Likelihood ratio statistics.
PValue	The two-sided p-value.

## Sheet: EBNA2- vs Uninfected
chromosome (left)	start (left)	end (left)	anchor_length (left)	chromosome (right)	start (right)	end (right)	anchor_length (right)	loopWidth	logFC	logCPM	LR	PValue
chr1	712255	716177	3923	chr1	761744	764405	2662	48858	2.57893	3.88376	1.80247	0.179414
chr1	712255	716177	3923	chr1	1078194	1081930	3737	365846	-2.10967	3.88438	1.00111	0.317041
chr1	712255	716177	3923	chr1	1165102	1167882	2781	452276	-2.11484	3.88709	1.00394	0.31636
chr1	712255	716177	3923	chr1	1405386	1409111	3726	693032	2.57893	3.88376	1.80247	0.179414
chr1	712255	716177	3923	chr1	1492415	1494050	1636	779016	-2.10967	3.88438	1.00111	0.317041
chr1	712255	716177	3923	chr1	1508932	1511325	2394	795912	-2.10967	3.88438	1.00111	0.317041
chr1	712255	716177	3923	chr1	1608442	1611221	2780	895615	2.57893	3.88376	1.80247	0.179414
chr1	712255	716177	3923	chr1	1708427	1715416	6990	997705	-2.93008	4.03414	1.97452	0.159969
chr1	712255	716177	3923	chr1	1762950	1767893	4944	1051205	-0.361142	4.17406	0.0551936	0.814261
chr1	761744	764405	2662	chr1	893040	896870	3831	131880	2.57893	3.88376	1.80247	0.179414
chr1	761744	764405	2662	chr1	1207484	1210739	3256	446037	-2.10967	3.88438	1.00111	0.317041
chr1	761744	764405	2662	chr1	1508932	1511325	2394	747054	-2.11484	3.88709	1.00394	0.31636
chr1	761744	764405	2662	chr1	1793456	1798169	4714	1032738	-2.10967	3.88438	1.00111	0.317041
chr1	761744	764405	2662	chr1	1837198	1841609	4412	1076329	-2.11484	3.88709	1.00394	0.31636
chr1	761744	764405	2662	chr1	1980380	1983027	2648	1218629	-2.10967	3.88438	1.00111	0.317041
chr1	893040	896870	3831	chr1	947693	951090	3398	54436	-2.11484	3.88709	1.00394	0.31636
chr1	893040	896870	3831	chr1	1017648	1019543	1896	123640	-2.11484	3.88709	1.00394	0.31636
chr1	893040	896870	3831	chr1	1070688	1076581	5894	178679	2.57893	3.88376	1.80247	0.179414
chr1	893040	896870	3831	chr1	1078194	1081930	3737	185107	-2.10967	3.88438	1.00111	0.317041
chr1	893040	896870	3831	chr1	1091969	1094657	2689	198358	0.469252	4.03353	0.0789089	0.778781
chr1	893040	896870	3831	chr1	1165102	1167882	2781	271537	0.464089	4.03619	0.0775205	0.780686
chr1	893040	896870	3831	chr1	1240233	1245867	5635	348095	2.57893	3.88376	1.80247	0.179414
chr1	893040	896870	3831	chr1	1341072	1344217	3146	447689	2.57893	3.88376	1.80247	0.179414
chr1	893040	896870	3831	chr1	2476096	2481428	5333	1583807	-2.11484	3.88709	1.00394	0.31636
chr1	947693	951090	3398	chr1	1061928	1065340	3413	114242	-2.10967	3.88438	1.00111	0.317041
chr1	947693	951090	3398	chr1	1070688	1076581	5894	124243	-0.694248	4.61225	0.360433	0.548266
chr1	947693	951090	3398	chr1	1078194	1081930	3737	130670	0.469252	4.03353	0.0789089	0.778781
chr1	947693	951090	3398	chr1	1091969	1094657	2689	143921	2.57893	3.88376	1.80247	0.179414
chr1	947693	951090	3398	chr1	1112754	1114681	1928	164326	2.57893	3.88376	1.80247	0.179414
chr1	947693	951090	3398	chr1	1165102	1167882	2781	217100	-2.94007	4.03946	1.98523	0.15884
chr1	947693	951090	3398	chr1	1207484	1210739	3256	259720	0.469252	4.03353	0.0789089	0.778781
chr1	947693	951090	3398	chr1	1235008	1236742	1735	286483	-2.11484	3.88709	1.00394	0.31636
chr1	947693	951090	3398	chr1	1240233	1245867	5635	293658	-0.879339	4.29735	0.373495	0.541106
chr1	947693	951090	3398	chr1	1259028	1262182	3155	311213	-3.4486	4.16944	2.92196	0.0873815
chr1	947693	951090	3398	chr1	1341072	1344217	3146	393253	-2.93008	4.03414	1.97452	0.159969
chr1	947693	951090	3398	chr1	1540602	1543788	3187	592803	-2.10967	3.88438	1.00111	0.317041
chr1	947693	951090	3398	chr1	1549906	1552004	2099	601563	2.57893	3.88376	1.80247	0.179414
chr1	947693	951090	3398	chr1	1708427	1715416	6990	762530	2.57893	3.88376	1.80247	0.179414
chr1	947693	951090	3398	chr1	1762950	1767893	4944	816030	2.57893	3.88376	1.80247	0.179414
chr1	947693	951090	3398	chr1	1771243	1776487	5245	824473	-2.10967	3.88438	1.00111	0.317041
chr1	947693	951090	3398	chr1	2515688	2518612	2925	1567758	-2.11484	3.88709	1.00394	0.31636
chr1	993840	996417	2578	chr1	1070688	1076581	5894	78506	2.57893	3.88376	1.80247	0.179414
chr1	993840	996417	2578	chr1	1078194	1081930	3737	84933	-2.11484	3.88709	1.00394	0.31636
chr1	993840	996417	2578	chr1	1091969	1094657	2689	98184	-2.10967	3.88438	1.00111	0.317041
chr1	993840	996417	2578	chr1	1165102	1167882	2781	171363	-2.10967	3.88438	1.00111	0.317041
chr1	993840	996417	2578	chr1	1309279	1312529	3251	315775	2.57893	3.88376	1.80247	0.179414
chr1	993840	996417	2578	chr1	1341072	1344217	3146	347516	-2.10967	3.88438	1.00111	0.317041
chr1	993840	996417	2578	chr1	1445583	1448736	3154	452031	-2.10967	3.88438	1.00111	0.317041
chr1	993840	996417	2578	chr1	1456629	1460460	3832	463416	-2.10967	3.88438	1.00111	0.317041
chr1	993840	996417	2578	chr1	1793456	1798169	4714	800684	2.57893	3.88376	1.80247	0.179414
chr1	1017648	1019543	1896	chr1	1070688	1076581	5894	55039	-2.10967	3.88438	1.00111	0.317041
chr1	1017648	1019543	1896	chr1	1078194	1081930	3737	61466	-2.11484	3.88709	1.00394	0.31636
chr1	1017648	1019543	1896	chr1	1284938	1289967	5030	268857	-2.11484	3.88709	1.00394	0.31636
chr1	1017648	1019543	1896	chr1	1309279	1312529	3251	292308	2.57893	3.88376	1.80247	0.179414
chr1	1017648	1019543	1896	chr1	1549906	1552004	2099	532359	2.57893	3.88376	1.80247	0.179414
chr1	1017648	1019543	1896	chr1	1708427	1715416	6990	693326	-2.11484	3.88709	1.00394	0.31636
chr1	1017648	1019543	1896	chr1	2515688	2518612	2925	1498554	-2.11484	3.88709	1.00394	0.31636
chr1	1061928	1065340	3413	chr1	1070688	1076581	5894	10000	3.44292	4.03292	3.53119	0.0602246
chr1	1061928	1065340	3413	chr1	1078194	1081930	3737	16428	-3.45343	4.17205	2.92956	0.0869714
chr1	1061928	1065340	3413	chr1	1091969	1094657	2689	29679	-2.94007	4.03946	1.98523	0.15884
chr1	1061928	1065340	3413	chr1	1207484	1210739	3256	145477	-2.11484	3.88709	1.00394	0.31636
chr1	1061928	1065340	3413	chr1	1309279	1312529	3251	247270	-2.10967	3.88438	1.00111	0.317041
chr1	1061928	1065340	3413	chr1	1341072	1344217	3146	279010	-2.11484	3.88709	1.00394	0.31636
chr1	1061928	1065340	3413	chr1	1445583	1448736	3154	383525	-2.11484	3.88709	1.00394	0.31636
chr1	1061928	1065340	3413	chr1	1837198	1841609	4412	775769	2.57893	3.88376	1.80247	0.179414
chr1	1061928	1065340	3413	chr1	1868118	1870808	2691	805829	-2.11484	3.88709	1.00394	0.31636
chr1	1070688	1076581	5894	chr1	1078194	1081930	3737	6427	-0.869387	6.60001	2.12211	0.145186
chr1	1070688	1076581	5894	chr1	1091969	1094657	2689	19678	-2.0204	4.70622	2.6018	0.106743
chr1	1070688	1076581	5894	chr1	1112754	1114681	1928	40083	-3.4486	4.16944	2.92196	0.0873815
chr1	1070688	1076581	5894	chr1	1165102	1167882	2781	92857	3.50433	4.05674	3.62885	0.0567861
chr1	1070688	1076581	5894	chr1	1207484	1210739	3256	135477	-3.84243	4.3005	3.87397	0.0490403
chr1	1070688	1076581	5894	chr1	1235008	1236742	1735	162240	0.469252	4.03353	0.0789089	0.778781
chr1	1070688	1076581	5894	chr1	1240233	1245867	5635	169415	-0.292941	4.19512	0.0385064	0.84443
chr1	1070688	1076581	5894	chr1	1259028	1262182	3155	186970	2.57893	3.88376	1.80247	0.179414
chr1	1070688	1076581	5894	chr1	1263249	1268476	5228	192228	-2.10967	3.88438	1.00111	0.317041
chr1	1070688	1076581	5894	chr1	1296637	1298764	2128	224066	-2.93008	4.03414	1.97452	0.159969
chr1	1070688	1076581	5894	chr1	1309279	1312529	3251	237269	0.464089	4.03619	0.0775205	0.780686
chr1	1070688	1076581	5894	chr1	1332499	1337197	4699	261213	0.469252	4.03353	0.0789089	0.778781
chr1	1070688	1076581	5894	chr1	1623327	1625328	2002	550693	-2.11484	3.88709	1.00394	0.31636
chr1	1070688	1076581	5894	chr1	1762950	1767893	4944	691787	-2.11484	3.88709	1.00394	0.31636
chr1	1070688	1076581	5894	chr1	1771243	1776487	5245	700230	1.03813	4.40697	0.707525	0.400267
chr1	1070688	1076581	5894	chr1	1837198	1841609	4412	765769	2.57893	3.88376	1.80247	0.179414
chr1	1070688	1076581	5894	chr1	2485419	2491852	6434	1415001	-2.10967	3.88438	1.00111	0.317041
chr1	1078194	1081930	3737	chr1	1091969	1094657	2689	13251	-1.15455	5.41338	1.83782	0.175206
chr1	1078194	1081930	3737	chr1	1112754	1114681	1928	33655	0.960397	4.63165	0.771003	0.379907
chr1	1078194	1081930	3737	chr1	1165102	1167882	2781	86430	-0.703364	4.61711	0.36957	0.543239
chr1	1078194	1081930	3737	chr1	1207484	1210739	3256	129049	-0.632831	4.63521	0.301763	0.582779
chr1	1078194	1081930	3737	chr1	1235008	1236742	1735	155813	3.44292	4.03292	3.53119	0.0602246
chr1	1078194	1081930	3737	chr1	1240233	1245867	5635	162988	0.469252	4.03353	0.0789089	0.778781
chr1	1078194	1081930	3737	chr1	1259028	1262182	3155	180543	-2.11484	3.88709	1.00394	0.31636
chr1	1078194	1081930	3737	chr1	1309279	1312529	3251	230842	2.57893	3.88376	1.80247	0.179414
chr1	1078194	1081930	3737	chr1	1332499	1337197	4699	254786	0.527287	4.06005	0.0951824	0.757689
chr1	1078194	1081930	3737	chr1	1589400	1591756	2357	510516	2.57893	3.88376	1.80247	0.179414
chr1	1078194	1081930	3737	chr1	1771243	1776487	5245	693803	-0.361142	4.17406	0.0551936	0.814261
chr1	1078194	1081930	3737	chr1	1793456	1798169	4714	715750	-2.94007	4.03946	1.98523	0.15884
chr1	1078194	1081930	3737	chr1	1830551	1833838	3288	752132	-2.93507	4.03679	1.97986	0.159405
chr1	1078194	1081930	3737	chr1	2042114	2045694	3581	963842	2.57893	3.88376	1.80247	0.179414
chr1	1078194	1081930	3737	chr1	2515688	2518612	2925	1437088	-2.93008	4.03414	1.97452	0.159969
chr1	1091969	1094657	2689	chr1	1112754	1114681	1928	20404	-2.10967	3.88438	1.00111	0.317041
chr1	1091969	1094657	2689	chr1	1165102	1167882	2781	73179	1.39466	4.19188	0.872537	0.350254
chr1	1091969	1094657	2689	chr1	1207484	1210739	3256	115798	-2.10967	3.88438	1.00111	0.317041
chr1	1091969	1094657	2689	chr1	1240233	1245867	5635	149737	-0.356139	4.17145	0.0538612	0.816476
chr1	1091969	1094657	2689	chr1	1284938	1289967	5030	194139	-2.11484	3.88709	1.00394	0.31636
chr1	1091969	1094657	2689	chr1	1332499	1337197	4699	241535	2.57893	3.88376	1.80247	0.179414
chr1	1091969	1094657	2689	chr1	1341072	1344217	3146	249331	3.50433	4.05674	3.62885	0.0567861
chr1	1091969	1094657	2689	chr1	1405386	1409111	3726	313935	-2.10967	3.88438	1.00111	0.317041
chr1	1091969	1094657	2689	chr1	1708427	1715416	6990	618608	-2.10967	3.88438	1.00111	0.317041
chr1	1091969	1094657	2689	chr1	2042114	2045694	3581	950591	-2.10967	3.88438	1.00111	0.317041
chr1	1091969	1094657	2689	chr1	2342909	2346095	3187	1251189	-2.11484	3.88709	1.00394	0.31636
chr1	1091969	1094657	2689	chr1	2507996	2510952	2957	1416161	-2.11484	3.88709	1.00394	0.31636
chr1	1112754	1114681	1928	chr1	1165102	1167882	2781	52774	-3.45343	4.17205	2.92956	0.0869714
chr1	1112754	1114681	1928	chr1	1240233	1245867	5635	129332	-2.10967	3.88438	1.00111	0.317041
chr1	1112754	1114681	1928	chr1	1445583	1448736	3154	333442	-2.11484	3.88709	1.00394	0.31636
chr1	1165102	1167882	2781	chr1	1207484	1210739	3256	42619	-0.8745	4.29479	0.369729	0.543152
chr1	1165102	1167882	2781	chr1	1240233	1245867	5635	76558	-0.8745	4.29479	0.369729	0.543152
chr1	1165102	1167882	2781	chr1	1263249	1268476	5228	99370	2.57893	3.88376	1.80247	0.179414
chr1	1165102	1167882	2781	chr1	1309279	1312529	3251	144412	-2.11484	3.88709	1.00394	0.31636
chr1	1165102	1167882	2781	chr1	1332499	1337197	4699	168356	2.57893	3.88376	1.80247	0.179414
chr1	1165102	1167882	2781	chr1	1445583	1448736	3154	280667	2.57893	3.88376	1.80247	0.179414
chr1	1165102	1167882	2781	chr1	1492415	1494050	1636	326740	2.57893	3.88376	1.80247	0.179414
chr1	1165102	1167882	2781	chr1	1508932	1511325	2394	343636	-2.10967	3.88438	1.00111	0.317041
chr1	1165102	1167882	2781	chr1	1563763	1567186	3424	398982	-2.11484	3.88709	1.00394	0.31636
chr1	1165102	1167882	2781	chr1	1623327	1625328	2002	457835	-2.11484	3.88709	1.00394	0.31636
chr1	1165102	1167882	2781	chr1	1708427	1715416	6990	545429	0.469252	4.03353	0.0789089	0.778781
chr1	1165102	1167882	2781	chr1	1762950	1767893	4944	598929	-2.11484	3.88709	1.00394	0.31636
chr1	1165102	1167882	2781	chr1	1771243	1776487	5245	607373	-2.94007	4.03946	1.98523	0.15884
chr1	1165102	1167882	2781	chr1	2342909	2346095	3187	1178010	-2.10967	3.88438	1.00111	0.317041
chr1	1165102	1167882	2781	chr1	2515688	2518612	2925	1350658	2.57893	3.88376	1.80247	0.179414
chr1	1207484	1210739	3256	chr1	1235008	1236742	1735	26763	-2.93507	4.03679	1.97986	0.159405
chr1	1207484	1210739	3256	chr1	1240233	1245867	5635	33938	-0.385459	4.50989	0.102996	0.748263
chr1	1207484	1210739	3256	chr1	1259028	1262182	3155	51493	-0.35115	4.16885	0.0525494	0.818685
chr1	1207484	1210739	3256	chr1	1309279	1312529	3251	101792	-2.11484	3.88709	1.00394	0.31636
chr1	1207484	1210739	3256	chr1	1332499	1337197	4699	125736	0.53245	4.05736	0.0967166	0.755806
chr1	1207484	1210739	3256	chr1	1508932	1511325	2394	301017	2.57893	3.88376	1.80247	0.179414
chr1	1207484	1210739	3256	chr1	1608442	1611221	2780	400720	-2.11484	3.88709	1.00394	0.31636
chr1	1207484	1210739	3256	chr1	1664867	1666259	1393	456451	2.57893	3.88376	1.80247	0.179414
chr1	1207484	1210739	3256	chr1	1762950	1767893	4944	556310	2.57893	3.88376	1.80247	0.179414
chr1	1207484	1210739	3256	chr1	1771243	1776487	5245	564753	2.57893	3.88376	1.80247	0.179414
chr1	1207484	1210739	3256	chr1	1793456	1798169	4714	586701	-2.94007	4.03946	1.98523	0.15884
chr1	1207484	1210739	3256	chr1	2342909	2346095	3187	1135390	-2.11484	3.88709	1.00394	0.31636
chr1	1235008	1236742	1735	chr1	1240233	1245867	5635	7175	0.261913	4.65542	0.0536496	0.81683
chr1	1235008	1236742	1735	chr1	1259028	1262182	3155	24730	-0.869674	4.29223	0.365995	0.545196
chr1	1235008	1236742	1735	chr1	1332499	1337197	4699	98973	0.464089	4.03619	0.0775205	0.780686
chr1	1235008	1236742	1735	chr1	1445583	1448736	3154	211284	0.507851	4.29421	0.144875	0.703482
chr1	1235008	1236742	1735	chr1	1508932	1511325	2394	274253	-2.93008	4.03414	1.97452	0.159969
chr1	1235008	1236742	1735	chr1	1589400	1591756	2357	354703	2.57893	3.88376	1.80247	0.179414
chr1	1235008	1236742	1735	chr1	1708427	1715416	6990	476046	-2.10967	3.88438	1.00111	0.317041
chr1	1235008	1236742	1735	chr1	1793456	1798169	4714	559937	-2.10967	3.88438	1.00111	0.317041
chr1	1240233	1245867	5635	chr1	1259028	1262182	3155	17555	0.887042	5.15461	1.1068	0.292779
chr1	1240233	1245867	5635	chr1	1263249	1268476	5228	22812	-2.11484	3.88709	1.00394	0.31636
chr1	1240233	1245867	5635	chr1	1309279	1312529	3251	67854	3.44292	4.03292	3.53119	0.0602246
chr1	1240233	1245867	5635	chr1	1332499	1337197	4699	91798	0.464089	4.03619	0.0775205	0.780686
chr1	1240233	1245867	5635	chr1	1341072	1344217	3146	99594	-3.84243	4.3005	3.87397	0.0490403
chr1	1240233	1245867	5635	chr1	1405386	1409111	3726	164198	0.464089	4.03619	0.0775205	0.780686
chr1	1240233	1245867	5635	chr1	1445583	1448736	3154	204109	-2.10967	3.88438	1.00111	0.317041
chr1	1240233	1245867	5635	chr1	1549906	1552004	2099	307905	-2.11484	3.88709	1.00394	0.31636
chr1	1240233	1245867	5635	chr1	1608442	1611221	2780	366781	0.464089	4.03619	0.0775205	0.780686
chr1	1240233	1245867	5635	chr1	1708427	1715416	6990	468871	-2.11484	3.88709	1.00394	0.31636
chr1	1240233	1245867	5635	chr1	1754631	1756089	1459	512310	2.64212	3.90778	1.85425	0.17329
chr1	1240233	1245867	5635	chr1	1762950	1767893	4944	522371	-2.11484	3.88709	1.00394	0.31636
chr1	1240233	1245867	5635	chr1	1771243	1776487	5245	530815	-2.93008	4.03414	1.97452	0.159969
chr1	1240233	1245867	5635	chr1	1793456	1798169	4714	552762	-2.11484	3.88709	1.00394	0.31636
chr1	1240233	1245867	5635	chr1	1926881	1928637	1757	684709	-2.11484	3.88709	1.00394	0.31636
chr1	1240233	1245867	5635	chr1	2185818	2188841	3024	944279	2.57893	3.88376	1.80247	0.179414
chr1	1240233	1245867	5635	chr1	2485419	2491852	6434	1245585	-2.93507	4.03679	1.97986	0.159405
chr1	1240233	1245867	5635	chr1	2515688	2518612	2925	1274100	-2.11484	3.88709	1.00394	0.31636
chr1	1259028	1262182	3155	chr1	1263249	1268476	5228	5257	3.27747	4.8286	8.23989	0.00409797
chr1	1259028	1262182	3155	chr1	1284938	1289967	5030	26847	-2.10967	3.88438	1.00111	0.317041
chr1	1259028	1262182	3155	chr1	1332499	1337197	4699	74243	-0.8745	4.29479	0.369729	0.543152
chr1	1259028	1262182	3155	chr1	1341072	1344217	3146	82039	3.44292	4.03292	3.53119	0.0602246
chr1	1259028	1262182	3155	chr1	1445583	1448736	3154	186554	-2.11484	3.88709	1.00394	0.31636
chr1	1259028	1262182	3155	chr1	1492415	1494050	1636	232627	-2.11484	3.88709	1.00394	0.31636
chr1	1259028	1262182	3155	chr1	1549906	1552004	2099	290350	2.64212	3.90778	1.85425	0.17329
chr1	1259028	1262182	3155	chr1	1563763	1567186	3424	304869	2.57893	3.88376	1.80247	0.179414
chr1	1259028	1262182	3155	chr1	1623327	1625328	2002	363722	2.57893	3.88376	1.80247	0.179414
chr1	1259028	1262182	3155	chr1	1730421	1734323	3903	471767	-2.10967	3.88438	1.00111	0.317041
chr1	1259028	1262182	3155	chr1	1762950	1767893	4944	504816	-2.10967	3.88438	1.00111	0.317041
chr1	1259028	1262182	3155	chr1	1771243	1776487	5245	513260	2.57893	3.88376	1.80247	0.179414
chr1	1259028	1262182	3155	chr1	1837198	1841609	4412	578798	1.32808	4.17086	0.802402	0.370376
chr1	1259028	1262182	3155	chr1	1980380	1983027	2648	721098	-2.93008	4.03414	1.97452	0.159969
chr1	1259028	1262182	3155	chr1	2515688	2518612	2925	1256545	-2.11484	3.88709	1.00394	0.31636
chr1	1263249	1268476	5228	chr1	1309279	1312529	3251	45041	-1.55824	4.51538	1.38488	0.239272
chr1	1263249	1268476	5228	chr1	1341072	1344217	3146	76782	-2.11484	3.88709	1.00394	0.31636
chr1	1263249	1268476	5228	chr1	1508932	1511325	2394	244266	2.64212	3.90778	1.85425	0.17329
chr1	1263249	1268476	5228	chr1	1563763	1567186	3424	299612	2.57893	3.88376	1.80247	0.179414
chr1	1263249	1268476	5228	chr1	1771243	1776487	5245	508002	2.57893	3.88376	1.80247	0.179414
chr1	1263249	1268476	5228	chr1	1793456	1798169	4714	529950	-2.11484	3.88709	1.00394	0.31636
chr1	1284938	1289967	5030	chr1	1296637	1298764	2128	10248	-3.82838	4.29281	3.84501	0.0498944
chr1	1284938	1289967	5030	chr1	1332499	1337197	4699	47395	2.57893	3.88376	1.80247	0.179414
chr1	1284938	1289967	5030	chr1	1341072	1344217	3146	55192	-2.10967	3.88438	1.00111	0.317041
chr1	1284938	1289967	5030	chr1	1445583	1448736	3154	159707	2.64212	3.90778	1.85425	0.17329
chr1	1284938	1289967	5030	chr1	1623327	1625328	2002	336875	-2.11484	3.88709	1.00394	0.31636
chr1	1284938	1289967	5030	chr1	1708427	1715416	6990	424469	-2.10967	3.88438	1.00111	0.317041
chr1	1284938	1289967	5030	chr1	1730421	1734323	3903	444919	2.57893	3.88376	1.80247	0.179414
chr1	1284938	1289967	5030	chr1	1771243	1776487	5245	486412	-2.10967	3.88438	1.00111	0.317041
chr1	1284938	1289967	5030	chr1	1830551	1833838	3288	544742	-2.10967	3.88438	1.00111	0.317041
chr1	1296637	1298764	2128	chr1	1309279	1312529	3251	13203	-1.4905	4.53603	1.26819	0.260106
chr1	1296637	1298764	2128	chr1	1332499	1337197	4699	37147	-3.45343	4.17205	2.92956	0.0869714
chr1	1296637	1298764	2128	chr1	1341072	1344217	3146	44944	2.57893	3.88376	1.80247	0.179414
chr1	1296637	1298764	2128	chr1	1405386	1409111	3726	109548	3.44292	4.03292	3.53119	0.0602246
chr1	1296637	1298764	2128	chr1	1445583	1448736	3154	149459	-2.10967	3.88438	1.00111	0.317041
chr1	1296637	1298764	2128	chr1	1608442	1611221	2780	312131	-2.93008	4.03414	1.97452	0.159969
chr1	1296637	1298764	2128	chr1	1762950	1767893	4944	467721	-2.10967	3.88438	1.00111	0.317041
chr1	1296637	1298764	2128	chr1	1771243	1776487	5245	476164	2.57893	3.88376	1.80247	0.179414
chr1	1296637	1298764	2128	chr1	1837198	1841609	4412	541703	-2.10967	3.88438	1.00111	0.317041
chr1	1309279	1312529	3251	chr1	1332499	1337197	4699	23944	-0.0501672	5.21567	0.00334693	0.953866
chr1	1309279	1312529	3251	chr1	1341072	1344217	3146	31740	1.85835	4.29362	1.82579	0.176626
chr1	1309279	1312529	3251	chr1	1445583	1448736	3154	136255	-0.703364	4.61711	0.36957	0.543239
chr1	1309279	1312529	3251	chr1	1492415	1494050	1636	182328	-2.10967	3.88438	1.00111	0.317041
chr1	1309279	1312529	3251	chr1	1563763	1567186	3424	254570	2.57893	3.88376	1.80247	0.179414
chr1	1309279	1312529	3251	chr1	1608442	1611221	2780	298927	-2.93507	4.03679	1.97986	0.159405
chr1	1309279	1312529	3251	chr1	1708427	1715416	6990	401017	-0.0105104	4.40754	4.81688e-05	0.994462
chr1	1309279	1312529	3251	chr1	1730421	1734323	3903	421468	-2.10967	3.88438	1.00111	0.317041
chr1	1309279	1312529	3251	chr1	1762950	1767893	4944	454517	-2.10967	3.88438	1.00111	0.317041
chr1	1309279	1312529	3251	chr1	1771243	1776487	5245	462961	2.57893	3.88376	1.80247	0.179414
chr1	1309279	1312529	3251	chr1	1837198	1841609	4412	528499	-2.10967	3.88438	1.00111	0.317041
chr1	1309279	1312529	3251	chr1	2322250	2324955	2706	1012698	2.57893	3.88376	1.80247	0.179414
chr1	1309279	1312529	3251	chr1	2342909	2346095	3187	1033598	0.469252	4.03353	0.0789089	0.778781
chr1	1309279	1312529	3251	chr1	2515688	2518612	2925	1206246	-2.11484	3.88709	1.00394	0.31636
chr1	1332499	1337197	4699	chr1	1341072	1344217	3146	7796	-0.646534	5.77092	0.814664	0.366745
chr1	1332499	1337197	4699	chr1	1405386	1409111	3726	72400	0.514925	4.51426	0.200077	0.654658
chr1	1332499	1337197	4699	chr1	1445583	1448736	3154	112311	-1.24945	4.4056	0.828221	0.362787
chr1	1332499	1337197	4699	chr1	1456629	1460460	3832	123696	0.469252	4.03353	0.0789089	0.778781
chr1	1332499	1337197	4699	chr1	1492415	1494050	1636	158384	3.44292	4.03292	3.53119	0.0602246
chr1	1332499	1337197	4699	chr1	1540602	1543788	3187	207347	2.57893	3.88376	1.80247	0.179414
chr1	1332499	1337197	4699	chr1	1549906	1552004	2099	216107	0.502848	4.29677	0.142344	0.705962
chr1	1332499	1337197	4699	chr1	1563763	1567186	3424	230626	-2.11484	3.88709	1.00394	0.31636
chr1	1332499	1337197	4699	chr1	1608442	1611221	2780	274983	2.57893	3.88376	1.80247	0.179414
chr1	1332499	1337197	4699	chr1	1664867	1666259	1393	330715	-2.11484	3.88709	1.00394	0.31636
chr1	1332499	1337197	4699	chr1	1708427	1715416	6990	377073	-0.35115	4.16885	0.0525494	0.818685
chr1	1332499	1337197	4699	chr1	1762950	1767893	4944	430573	2.57893	3.88376	1.80247	0.179414
chr1	1332499	1337197	4699	chr1	1771243	1776487	5245	439017	-2.93507	4.03679	1.97986	0.159405
chr1	1332499	1337197	4699	chr1	1793456	1798169	4714	460964	-2.11484	3.88709	1.00394	0.31636
chr1	1332499	1337197	4699	chr1	2042114	2045694	3581	709056	-2.11484	3.88709	1.00394	0.31636
chr1	1332499	1337197	4699	chr1	2507996	2510952	2957	1174626	0.464089	4.03619	0.0775205	0.780686
chr1	1341072	1344217	3146	chr1	1405386	1409111	3726	64604	1.10289	4.42771	0.789275	0.37432
chr1	1341072	1344217	3146	chr1	1445583	1448736	3154	104515	-0.35115	4.16885	0.0525494	0.818685
chr1	1341072	1344217	3146	chr1	1456629	1460460	3832	115900	-2.10967	3.88438	1.00111	0.317041
chr1	1341072	1344217	3146	chr1	1492415	1494050	1636	150588	2.57893	3.88376	1.80247	0.179414
chr1	1341072	1344217	3146	chr1	1508932	1511325	2394	167484	-0.35115	4.16885	0.0525494	0.818685
chr1	1341072	1344217	3146	chr1	1563763	1567186	3424	222830	-2.10967	3.88438	1.00111	0.317041
chr1	1341072	1344217	3146	chr1	1762950	1767893	4944	422777	-2.10967	3.88438	1.00111	0.317041
chr1	1341072	1344217	3146	chr1	2125478	2127907	2430	784048	2.57893	3.88376	1.80247	0.179414
chr1	1341072	1344217	3146	chr1	2185818	2188841	3024	844685	-2.11484	3.88709	1.00394	0.31636
chr1	1405386	1409111	3726	chr1	1445583	1448736	3154	39911	0.464089	4.03619	0.0775205	0.780686
chr1	1405386	1409111	3726	chr1	1492415	1494050	1636	85984	-2.10967	3.88438	1.00111	0.317041
chr1	1405386	1409111	3726	chr1	1549906	1552004	2099	143706	2.57893	3.88376	1.80247	0.179414
chr1	1405386	1409111	3726	chr1	1608442	1611221	2780	202583	-2.11484	3.88709	1.00394	0.31636
chr1	1405386	1409111	3726	chr1	1664867	1666259	1393	258314	2.57893	3.88376	1.80247	0.179414
chr1	1405386	1409111	3726	chr1	1708427	1715416	6990	304673	1.32808	4.17086	0.802402	0.370376
chr1	1405386	1409111	3726	chr1	1837198	1841609	4412	432155	-2.10967	3.88438	1.00111	0.317041
chr1	1405386	1409111	3726	chr1	1980380	1983027	2648	574455	2.64212	3.90778	1.85425	0.17329
chr1	1405386	1409111	3726	chr1	2476096	2481428	5333	1071513	2.64212	3.90778	1.85425	0.17329
chr1	1445583	1448736	3154	chr1	1456629	1460460	3832	11385	2.57893	3.88376	1.80247	0.179414
chr1	1445583	1448736	3154	chr1	1492415	1494050	1636	46073	0.469252	4.03353	0.0789089	0.778781
chr1	1445583	1448736	3154	chr1	1508932	1511325	2394	62969	1.32808	4.17086	0.802402	0.370376
chr1	1445583	1448736	3154	chr1	1549906	1552004	2099	103795	-3.45343	4.17205	2.92956	0.0869714
chr1	1445583	1448736	3154	chr1	1563763	1567186	3424	118315	-4.38886	4.51842	5.66279	0.0173285
chr1	1445583	1448736	3154	chr1	1608442	1611221	2780	162672	-1.55824	4.51538	1.38488	0.239272
chr1	1445583	1448736	3154	chr1	1664867	1666259	1393	218403	-2.11484	3.88709	1.00394	0.31636
chr1	1445583	1448736	3154	chr1	1708427	1715416	6990	264762	3.97319	4.16766	5.19251	0.0226845
chr1	1445583	1448736	3154	chr1	1820228	1824568	4341	375238	-0.287952	4.19248	0.0374025	0.846648
chr1	1445583	1448736	3154	chr1	1837198	1841609	4412	392244	0.469252	4.03353	0.0789089	0.778781
chr1	1445583	1448736	3154	chr1	1980380	1983027	2648	534544	-2.11484	3.88709	1.00394	0.31636
chr1	1445583	1448736	3154	chr1	2485419	2491852	6434	1041476	-2.11484	3.88709	1.00394	0.31636
chr1	1445583	1448736	3154	chr1	2868473	2870791	2319	1422472	2.57893	3.88376	1.80247	0.179414
chr1	1456629	1460460	3832	chr1	1492415	1494050	1636	34688	2.57893	3.88376	1.80247	0.179414
chr1	1456629	1460460	3832	chr1	1508932	1511325	2394	51584	-2.10967	3.88438	1.00111	0.317041
chr1	1456629	1460460	3832	chr1	1549906	1552004	2099	92410	-2.10967	3.88438	1.00111	0.317041
chr1	1456629	1460460	3832	chr1	1608442	1611221	2780	151287	0.469252	4.03353	0.0789089	0.778781
chr1	1492415	1494050	1636	chr1	1508932	1511325	2394	16896	-4.59932	4.61578	6.5251	0.0106363
chr1	1492415	1494050	1636	chr1	1563763	1567186	3424	72242	-2.10967	3.88438	1.00111	0.317041
chr1	1492415	1494050	1636	chr1	1623327	1625328	2002	131095	-2.10967	3.88438	1.00111	0.317041
chr1	1492415	1494050	1636	chr1	1762950	1767893	4944	272189	-2.11484	3.88709	1.00394	0.31636
chr1	1492415	1494050	1636	chr1	1837198	1841609	4412	346171	0.469252	4.03353	0.0789089	0.778781
chr1	1492415	1494050	1636	chr1	2342909	2346095	3187	851269	-2.10967	3.88438	1.00111	0.317041
chr1	1492415	1494050	1636	chr1	2868473	2870791	2319	1376399	-2.10967	3.88438	1.00111	0.317041
chr1	1508932	1511325	2394	chr1	1540602	1543788	3187	32066	2.57893	3.88376	1.80247	0.179414
chr1	1508932	1511325	2394	chr1	1549906	1552004	2099	40826	-2.10967	3.88438	1.00111	0.317041
chr1	1508932	1511325	2394	chr1	1563763	1567186	3424	55346	-0.8745	4.29479	0.369729	0.543152
chr1	1508932	1511325	2394	chr1	1608442	1611221	2780	99703	2.57893	3.88376	1.80247	0.179414
chr1	1508932	1511325	2394	chr1	1708427	1715416	6990	201793	-0.879339	4.29735	0.373495	0.541106
chr1	1508932	1511325	2394	chr1	1771243	1776487	5245	263736	-2.10967	3.88438	1.00111	0.317041
chr1	1508932	1511325	2394	chr1	1793456	1798169	4714	285684	-2.10967	3.88438	1.00111	0.317041
chr1	1508932	1511325	2394	chr1	1820228	1824568	4341	312269	-2.11484	3.88709	1.00394	0.31636
chr1	1508932	1511325	2394	chr1	1980380	1983027	2648	471575	-2.11484	3.88709	1.00394	0.31636
chr1	1508932	1511325	2394	chr1	2322250	2324955	2706	813474	2.57893	3.88376	1.80247	0.179414
chr1	1508932	1511325	2394	chr1	2476096	2481428	5333	968633	2.57893	3.88376	1.80247	0.179414
chr1	1540602	1543788	3187	chr1	1549906	1552004	2099	8760	-0.361142	4.17406	0.0551936	0.814261
chr1	1540602	1543788	3187	chr1	1563763	1567186	3424	23279	-2.10967	3.88438	1.00111	0.317041
chr1	1540602	1543788	3187	chr1	1623327	1625328	2002	82132	-2.11484	3.88709	1.00394	0.31636
chr1	1540602	1543788	3187	chr1	1708427	1715416	6990	169726	-2.11484	3.88709	1.00394	0.31636
chr1	1540602	1543788	3187	chr1	1730421	1734323	3903	190177	-2.11484	3.88709	1.00394	0.31636
chr1	1540602	1543788	3187	chr1	1762950	1767893	4944	223226	2.57893	3.88376	1.80247	0.179414
chr1	1540602	1543788	3187	chr1	1771243	1776487	5245	231670	2.57893	3.88376	1.80247	0.179414
chr1	1540602	1543788	3187	chr1	1820228	1824568	4341	280203	-2.10967	3.88438	1.00111	0.317041
chr1	1540602	1543788	3187	chr1	2515688	2518612	2925	974955	-2.93008	4.03414	1.97452	0.159969
chr1	1549906	1552004	2099	chr1	1563763	1567186	3424	14519	-1.55824	4.51538	1.38488	0.239272
chr1	1549906	1552004	2099	chr1	1608442	1611221	2780	58876	-2.93008	4.03414	1.97452	0.159969
chr1	1549906	1552004	2099	chr1	1623327	1625328	2002	73372	-2.10967	3.88438	1.00111	0.317041
chr1	1549906	1552004	2099	chr1	1664867	1666259	1393	114608	2.57893	3.88376	1.80247	0.179414
chr1	1549906	1552004	2099	chr1	1708427	1715416	6990	160966	0.464089	4.03619	0.0775205	0.780686
chr1	1549906	1552004	2099	chr1	1730421	1734323	3903	181417	0.469252	4.03353	0.0789089	0.778781
chr1	1549906	1552004	2099	chr1	1762950	1767893	4944	214466	-2.93008	4.03414	1.97452	0.159969
chr1	1549906	1552004	2099	chr1	1793456	1798169	4714	244857	0.469252	4.03353	0.0789089	0.778781
chr1	1549906	1552004	2099	chr1	2042114	2045694	3581	492949	-2.10967	3.88438	1.00111	0.317041
chr1	1563763	1567186	3424	chr1	1589400	1591756	2357	25103	-2.11484	3.88709	1.00394	0.31636
chr1	1563763	1567186	3424	chr1	1608442	1611221	2780	44357	-1.55824	4.51538	1.38488	0.239272
chr1	1563763	1567186	3424	chr1	1623327	1625328	2002	58853	-2.93507	4.03679	1.97986	0.159405
chr1	1563763	1567186	3424	chr1	1708427	1715416	6990	146447	0.218417	4.78766	0.0485238	0.825652
chr1	1563763	1567186	3424	chr1	1730421	1734323	3903	166897	0.51284	4.29165	0.147421	0.701013
chr1	1563763	1567186	3424	chr1	1771243	1776487	5245	208390	3.44292	4.03292	3.53119	0.0602246
chr1	1563763	1567186	3424	chr1	1793456	1798169	4714	230338	2.57893	3.88376	1.80247	0.179414
chr1	1563763	1567186	3424	chr1	1837198	1841609	4412	273929	2.57893	3.88376	1.80247	0.179414
chr1	1563763	1567186	3424	chr1	2342909	2346095	3187	779027	-2.10967	3.88438	1.00111	0.317041
chr1	1563763	1567186	3424	chr1	3512860	3517578	4719	1949744	-2.10967	3.88438	1.00111	0.317041
chr1	1589400	1591756	2357	chr1	1623327	1625328	2002	33749	-2.93507	4.03679	1.97986	0.159405
chr1	1589400	1591756	2357	chr1	1654718	1657045	2328	65303	-0.287952	4.19248	0.0374025	0.846648
chr1	1589400	1591756	2357	chr1	1708427	1715416	6990	121343	2.57893	3.88376	1.80247	0.179414
chr1	1589400	1591756	2357	chr1	1730421	1734323	3903	141794	-2.10967	3.88438	1.00111	0.317041
chr1	1589400	1591756	2357	chr1	1762950	1767893	4944	174843	-2.11484	3.88709	1.00394	0.31636
chr1	1589400	1591756	2357	chr1	1820228	1824568	4341	231820	-2.10967	3.88438	1.00111	0.317041
chr1	1589400	1591756	2357	chr1	1830551	1833838	3288	241616	-2.11484	3.88709	1.00394	0.31636
chr1	1589400	1591756	2357	chr1	1980380	1983027	2648	391125	-2.10967	3.88438	1.00111	0.317041
chr1	1608442	1611221	2780	chr1	1623327	1625328	2002	14496	1.32808	4.17086	0.802402	0.370376
chr1	1608442	1611221	2780	chr1	1664867	1666259	1393	55731	2.57893	3.88376	1.80247	0.179414
chr1	1608442	1611221	2780	chr1	1708427	1715416	6990	102090	-4.78258	4.70676	7.36755	0.00664114
chr1	1608442	1611221	2780	chr1	1730421	1734323	3903	122540	3.44292	4.03292	3.53119	0.0602246
chr1	1608442	1611221	2780	chr1	1754631	1756089	1459	145528	-2.10967	3.88438	1.00111	0.317041
chr1	1608442	1611221	2780	chr1	1762950	1767893	4944	155590	-2.93507	4.03679	1.97986	0.159405
chr1	1608442	1611221	2780	chr1	1771243	1776487	5245	164033	-0.356139	4.17145	0.0538612	0.816476
chr1	1608442	1611221	2780	chr1	1793456	1798169	4714	185981	0.469252	4.03353	0.0789089	0.778781
chr1	1608442	1611221	2780	chr1	1820228	1824568	4341	212566	-2.10967	3.88438	1.00111	0.317041
chr1	1608442	1611221	2780	chr1	1837198	1841609	4412	229572	2.57893	3.88376	1.80247	0.179414
chr1	1608442	1611221	2780	chr1	1926881	1928637	1757	317927	-2.11484	3.88709	1.00394	0.31636
chr1	1608442	1611221	2780	chr1	2042114	2045694	3581	434072	2.57893	3.88376	1.80247	0.179414
chr1	1608442	1611221	2780	chr1	2185818	2188841	3024	577498	-2.93507	4.03679	1.97986	0.159405
chr1	1608442	1611221	2780	chr1	2515688	2518612	2925	907318	2.57893	3.88376	1.80247	0.179414
chr1	1623327	1625328	2002	chr1	1654718	1657045	2328	31554	-3.45827	4.17466	2.93719	0.0865614
chr1	1623327	1625328	2002	chr1	1664867	1666259	1393	41235	-2.11484	3.88709	1.00394	0.31636
chr1	1623327	1625328	2002	chr1	1708427	1715416	6990	87594	-0.63043	4.87328	0.392254	0.531117
chr1	1623327	1625328	2002	chr1	1730421	1734323	3903	108044	2.57893	3.88376	1.80247	0.179414
chr1	1623327	1625328	2002	chr1	1754631	1756089	1459	131032	-2.10967	3.88438	1.00111	0.317041
chr1	1623327	1625328	2002	chr1	1762950	1767893	4944	141094	-1.25881	4.41063	0.840087	0.359372
chr1	1623327	1625328	2002	chr1	1771243	1776487	5245	149537	-1.56735	4.52033	1.40086	0.23658
chr1	1623327	1625328	2002	chr1	1793456	1798169	4714	171485	-2.93507	4.03679	1.97986	0.159405
chr1	1623327	1625328	2002	chr1	1820228	1824568	4341	198070	1.3895	4.19452	0.866914	0.351811
chr1	1623327	1625328	2002	chr1	1830551	1833838	3288	207867	-2.10967	3.88438	1.00111	0.317041
chr1	1623327	1625328	2002	chr1	1837198	1841609	4412	215076	-0.168527	4.70514	0.024614	0.875333
chr1	1623327	1625328	2002	chr1	1926881	1928637	1757	303431	2.57893	3.88376	1.80247	0.179414
chr1	1623327	1625328	2002	chr1	2485419	2491852	6434	864308	2.57893	3.88376	1.80247	0.179414
chr1	1623327	1625328	2002	chr1	2507996	2510952	2957	885146	-2.10967	3.88438	1.00111	0.317041
chr1	1654718	1657045	2328	chr1	1708427	1715416	6990	56040	-2.93507	4.03679	1.97986	0.159405
chr1	1654718	1657045	2328	chr1	1762950	1767893	4944	109540	3.44292	4.03292	3.53119	0.0602246
chr1	1654718	1657045	2328	chr1	1771243	1776487	5245	117983	2.57893	3.88376	1.80247	0.179414
chr1	1654718	1657045	2328	chr1	1820228	1824568	4341	166516	2.57893	3.88376	1.80247	0.179414
chr1	1654718	1657045	2328	chr1	1837198	1841609	4412	183522	-2.10967	3.88438	1.00111	0.317041
chr1	1654718	1657045	2328	chr1	1926881	1928637	1757	271877	-2.10967	3.88438	1.00111	0.317041
chr1	1664867	1666259	1393	chr1	1708427	1715416	6990	46358	-2.93008	4.03414	1.97452	0.159969
chr1	1664867	1666259	1393	chr1	1762950	1767893	4944	99858	-2.11484	3.88709	1.00394	0.31636
chr1	1664867	1666259	1393	chr1	1771243	1776487	5245	108302	0.469252	4.03353	0.0789089	0.778781
chr1	1664867	1666259	1393	chr1	1793456	1798169	4714	130249	-2.11484	3.88709	1.00394	0.31636
chr1	1664867	1666259	1393	chr1	1837198	1841609	4412	173840	2.57893	3.88376	1.80247	0.179414
chr1	1708427	1715416	6990	chr1	1730421	1734323	3903	20450	-0.356365	6.69859	0.397684	0.528288
chr1	1708427	1715416	6990	chr1	1754631	1756089	1459	43438	-0.809384	4.94698	0.676393	0.410831
chr1	1708427	1715416	6990	chr1	1762950	1767893	4944	53500	-0.59997	6.95608	1.23457	0.266521
chr1	1708427	1715416	6990	chr1	1771243	1776487	5245	61943	0.144687	7.4236	0.0881215	0.766579
chr1	1708427	1715416	6990	chr1	1793456	1798169	4714	83891	0.264628	6.54164	0.216037	0.642076
chr1	1708427	1715416	6990	chr1	1820228	1824568	4341	110476	0.975607	5.33253	1.5304	0.216053
chr1	1708427	1715416	6990	chr1	1830551	1833838	3288	120273	-0.572139	5.2757	0.460139	0.497559
chr1	1708427	1715416	6990	chr1	1837198	1841609	4412	127482	0.114844	6.5241	0.0410636	0.839415
chr1	1708427	1715416	6990	chr1	1868118	1870808	2691	157541	2.57893	3.88376	1.80247	0.179414
chr1	1708427	1715416	6990	chr1	1926881	1928637	1757	215837	3.44292	4.03292	3.53119	0.0602246
chr1	1708427	1715416	6990	chr1	2125478	2127907	2430	414771	-2.11484	3.88709	1.00394	0.31636
chr1	1708427	1715416	6990	chr1	2185818	2188841	3024	475408	0.464089	4.03619	0.0775205	0.780686
chr1	1708427	1715416	6990	chr1	2322250	2324955	2706	611681	3.44292	4.03292	3.53119	0.0602246
chr1	1708427	1715416	6990	chr1	2330581	2333078	2498	619908	-2.10967	3.88438	1.00111	0.317041
chr1	1708427	1715416	6990	chr1	2342909	2346095	3187	632580	-2.11484	3.88709	1.00394	0.31636
chr1	1708427	1715416	6990	chr1	2424097	2429120	5024	714687	2.57893	3.88376	1.80247	0.179414
chr1	1708427	1715416	6990	chr1	2476096	2481428	5333	766840	-1.54916	4.51045	1.36908	0.24197
chr1	1708427	1715416	6990	chr1	2507996	2510952	2957	797552	2.57893	3.88376	1.80247	0.179414
chr1	1708427	1715416	6990	chr1	2868473	2870791	2319	1157710	2.57893	3.88376	1.80247	0.179414
chr1	1708427	1715416	6990	chr1	3580071	3585990	5920	1871109	3.44292	4.03292	3.53119	0.0602246
chr1	1730421	1734323	3903	chr1	1754631	1756089	1459	22988	-0.00568427	4.40503	1.16462e-05	0.997277
chr1	1730421	1734323	3903	chr1	1762950	1767893	4944	33049	-0.214126	5.82855	0.0950191	0.757891
chr1	1730421	1734323	3903	chr1	1771243	1776487	5245	41493	-0.357587	6.18487	0.30876	0.578442
chr1	1730421	1734323	3903	chr1	1793456	1798169	4714	63440	-1.50599	4.94976	2.06138	0.151074
chr1	1730421	1734323	3903	chr1	1820228	1824568	4341	90026	1.47876	4.53433	1.59667	0.206376
chr1	1730421	1734323	3903	chr1	1830551	1833838	3288	99822	1.32808	4.17086	0.802402	0.370376
chr1	1730421	1734323	3903	chr1	1837198	1841609	4412	107031	0.831217	5.12747	0.910374	0.340015
chr1	1730421	1734323	3903	chr1	2042114	2045694	3581	311532	2.64212	3.90778	1.85425	0.17329
chr1	1730421	1734323	3903	chr1	2485419	2491852	6434	756263	-2.10967	3.88438	1.00111	0.317041
chr1	1730421	1734323	3903	chr1	2515688	2518612	2925	784778	2.57893	3.88376	1.80247	0.179414
chr1	1754631	1756089	1459	chr1	1762950	1767893	4944	10061	-0.936898	5.29983	1.157	0.282089
chr1	1754631	1756089	1459	chr1	1771243	1776487	5245	18505	1.03082	5.35184	1.70004	0.192282
chr1	1754631	1756089	1459	chr1	1793456	1798169	4714	40452	-1.56279	4.51786	1.39285	0.237925
chr1	1754631	1756089	1459	chr1	1820228	1824568	4341	67038	2.57893	3.88376	1.80247	0.179414
chr1	1754631	1756089	1459	chr1	1830551	1833838	3288	76834	3.44292	4.03292	3.53119	0.0602246
chr1	1754631	1756089	1459	chr1	1837198	1841609	4412	84043	1.42052	4.51123	1.48316	0.223281
chr1	1754631	1756089	1459	chr1	3580071	3585990	5920	1827670	-2.93008	4.03414	1.97452	0.159969
chr1	1762950	1767893	4944	chr1	1771243	1776487	5245	8443	-0.185565	8.31639	0.173349	0.677153
chr1	1762950	1767893	4944	chr1	1793456	1798169	4714	30391	0.487926	6.37972	0.677146	0.410571
chr1	1762950	1767893	4944	chr1	1820228	1824568	4341	56976	0.699402	5.35647	0.786827	0.375061
chr1	1762950	1767893	4944	chr1	1830551	1833838	3288	66773	0.902154	4.60873	0.686877	0.407229
chr1	1762950	1767893	4944	chr1	1837198	1841609	4412	73982	0.581624	5.62807	0.643339	0.422504
chr1	1762950	1767893	4944	chr1	1868118	1870808	2691	104041	2.57893	3.88376	1.80247	0.179414
chr1	1762950	1767893	4944	chr1	1926881	1928637	1757	162337	2.57893	3.88376	1.80247	0.179414
chr1	1762950	1767893	4944	chr1	2125478	2127907	2430	361271	-2.10967	3.88438	1.00111	0.317041
chr1	1762950	1767893	4944	chr1	2330581	2333078	2498	566408	-2.11484	3.88709	1.00394	0.31636
chr1	1762950	1767893	4944	chr1	2476096	2481428	5333	713340	0.464089	4.03619	0.0775205	0.780686
chr1	1762950	1767893	4944	chr1	2515688	2518612	2925	751728	2.57893	3.88376	1.80247	0.179414
chr1	1762950	1767893	4944	chr1	3086303	3089275	2973	1322367	-2.10967	3.88438	1.00111	0.317041
chr1	1771243	1776487	5245	chr1	1793456	1798169	4714	21947	0.312116	6.85776	0.342346	0.558478
chr1	1771243	1776487	5245	chr1	1820228	1824568	4341	48533	-0.11295	5.38257	0.0200775	0.887321
chr1	1771243	1776487	5245	chr1	1830551	1833838	3288	58329	0.111985	5.15341	0.0178424	0.893738
chr1	1771243	1776487	5245	chr1	1837198	1841609	4412	65538	0.145489	6.12801	0.0531911	0.817601
chr1	1771243	1776487	5245	chr1	1868118	1870808	2691	95598	-2.11484	3.88709	1.00394	0.31636
chr1	1771243	1776487	5245	chr1	1926881	1928637	1757	153894	2.57893	3.88376	1.80247	0.179414
chr1	1771243	1776487	5245	chr1	2042114	2045694	3581	270039	-2.10967	3.88438	1.00111	0.317041
chr1	1771243	1776487	5245	chr1	2185818	2188841	3024	413464	-2.11484	3.88709	1.00394	0.31636
chr1	1771243	1776487	5245	chr1	2342909	2346095	3187	570637	-2.10967	3.88438	1.00111	0.317041
chr1	1771243	1776487	5245	chr1	2424097	2429120	5024	652743	2.64212	3.90778	1.85425	0.17329
chr1	1771243	1776487	5245	chr1	2476096	2481428	5333	704897	-2.11484	3.88709	1.00394	0.31636
chr1	1771243	1776487	5245	chr1	3136633	3140314	3682	1364608	-2.11484	3.88709	1.00394	0.31636
chr1	1771243	1776487	5245	chr1	3580071	3585990	5920	1809165	2.57893	3.88376	1.80247	0.179414
chr1	1771243	1776487	5245	chr1	3692430	3693851	1422	1919275	-2.10967	3.88438	1.00111	0.317041
chr1	1793456	1798169	4714	chr1	1820228	1824568	4341	26585	0.380771	5.35694	0.231835	0.630166
chr1	1793456	1798169	4714	chr1	1830551	1833838	3288	36382	-3.4486	4.16944	2.92196	0.0873815
chr1	1793456	1798169	4714	chr1	1837198	1841609	4412	43591	0.25135	5.40334	0.104266	0.746769
chr1	1793456	1798169	4714	chr1	2185818	2188841	3024	391517	2.57893	3.88376	1.80247	0.179414
chr1	1793456	1798169	4714	chr1	2322250	2324955	2706	527790	-2.93507	4.03679	1.97986	0.159405
chr1	1793456	1798169	4714	chr1	2485419	2491852	6434	692823	2.57893	3.88376	1.80247	0.179414
chr1	1793456	1798169	4714	chr1	3580071	3585990	5920	1787218	3.44292	4.03292	3.53119	0.0602246
chr1	1820228	1824568	4341	chr1	1830551	1833838	3288	9796	0.816423	4.78713	0.679457	0.409774
chr1	1820228	1824568	4341	chr1	1837198	1841609	4412	17005	-0.394819	4.51482	0.107759	0.74271
chr1	1820228	1824568	4341	chr1	3086303	3089275	2973	1265391	-2.10967	3.88438	1.00111	0.317041
chr1	1830551	1833838	3288	chr1	1837198	1841609	4412	7209	0.0468678	5.44493	0.00404069	0.949315
chr1	1830551	1833838	3288	chr1	2876156	2878253	2098	1045010	-2.10967	3.88438	1.00111	0.317041
chr1	1830551	1833838	3288	chr1	3580071	3585990	5920	1750836	0.464089	4.03619	0.0775205	0.780686
chr1	1837198	1841609	4412	chr1	1868118	1870808	2691	30059	-2.11484	3.88709	1.00394	0.31636
chr1	1837198	1841609	4412	chr1	1980380	1983027	2648	142300	2.57893	3.88376	1.80247	0.179414
chr1	1837198	1841609	4412	chr1	2185818	2188841	3024	347926	-2.10967	3.88438	1.00111	0.317041
chr1	1837198	1841609	4412	chr1	2322250	2324955	2706	484199	2.64212	3.90778	1.85425	0.17329
chr1	1837198	1841609	4412	chr1	2476096	2481428	5333	639358	-2.94007	4.03946	1.98523	0.15884
chr1	1837198	1841609	4412	chr1	2515688	2518612	2925	677746	-0.361142	4.17406	0.0551936	0.814261
chr1	1837198	1841609	4412	chr1	2868473	2870791	2319	1030228	2.57893	3.88376	1.80247	0.179414
chr1	1837198	1841609	4412	chr1	3136633	3140314	3682	1299070	-2.10967	3.88438	1.00111	0.317041
chr1	1837198	1841609	4412	chr1	3580071	3585990	5920	1743627	2.57893	3.88376	1.80247	0.179414
chr1	1837198	1841609	4412	chr1	3818201	3822234	4034	1980814	-2.11484	3.88709	1.00394	0.31636
chr1	1868118	1870808	2691	chr1	2322250	2324955	2706	454139	-2.11484	3.88709	1.00394	0.31636
chr1	1926881	1928637	1757	chr1	1980380	1983027	2648	53944	0.464089	4.03619	0.0775205	0.780686
chr1	1926881	1928637	1757	chr1	3823388	3828922	5535	1898396	-2.11484	3.88709	1.00394	0.31636
chr1	1980380	1983027	2648	chr1	2125478	2127907	2430	144989	-2.10967	3.88438	1.00111	0.317041
chr1	1980380	1983027	2648	chr1	2476096	2481428	5333	497058	-2.11484	3.88709	1.00394	0.31636
chr1	1980380	1983027	2648	chr1	2507996	2510952	2957	527770	2.57893	3.88376	1.80247	0.179414
chr1	1980380	1983027	2648	chr1	2515688	2518612	2925	535446	2.57893	3.88376	1.80247	0.179414
chr1	1980380	1983027	2648	chr1	3512860	3517578	4719	1533515	-2.10967	3.88438	1.00111	0.317041
chr1	2042114	2045694	3581	chr1	2125478	2127907	2430	82788	0.469252	4.03353	0.0789089	0.778781
chr1	2042114	2045694	3581	chr1	2476096	2481428	5333	434858	-3.45827	4.17466	2.93719	0.0865614
chr1	2042114	2045694	3581	chr1	2507996	2510952	2957	465570	2.57893	3.88376	1.80247	0.179414
chr1	2042114	2045694	3581	chr1	2515688	2518612	2925	473246	-2.10967	3.88438	1.00111	0.317041
chr1	2125478	2127907	2430	chr1	2185818	2188841	3024	60637	2.57893	3.88376	1.80247	0.179414
chr1	2125478	2127907	2430	chr1	2208875	2212030	3156	83760	-2.11484	3.88709	1.00394	0.31636
chr1	2125478	2127907	2430	chr1	2322250	2324955	2706	196910	0.464089	4.03619	0.0775205	0.780686
chr1	2125478	2127907	2430	chr1	2342909	2346095	3187	217809	-2.10967	3.88438	1.00111	0.317041
chr1	2125478	2127907	2430	chr1	2476096	2481428	5333	352069	0.53245	4.05736	0.0967166	0.755806
chr1	2125478	2127907	2430	chr1	3580071	3585990	5920	1456338	-2.11484	3.88709	1.00394	0.31636
chr1	2185818	2188841	3024	chr1	2208875	2212030	3156	23123	0.469252	4.03353	0.0789089	0.778781
chr1	2185818	2188841	3024	chr1	2330581	2333078	2498	144500	0.469252	4.03353	0.0789089	0.778781
chr1	2185818	2188841	3024	chr1	2342909	2346095	3187	157172	-2.11484	3.88709	1.00394	0.31636
chr1	2185818	2188841	3024	chr1	2476096	2481428	5333	291432	-2.10967	3.88438	1.00111	0.317041
chr1	2185818	2188841	3024	chr1	2507996	2510952	2957	322144	2.57893	3.88376	1.80247	0.179414
chr1	2185818	2188841	3024	chr1	3580071	3585990	5920	1395701	2.57893	3.88376	1.80247	0.179414
chr1	2322250	2324955	2706	chr1	2330581	2333078	2498	8227	-0.621841	4.86866	0.381894	0.536591
chr1	2322250	2324955	2706	chr1	2342909	2346095	3187	20899	-1.15641	4.79107	1.11959	0.290006
chr1	2322250	2324955	2706	chr1	2476096	2481428	5333	155159	0.51284	4.29165	0.147421	0.701013
chr1	2322250	2324955	2706	chr1	2485419	2491852	6434	165033	3.44292	4.03292	3.53119	0.0602246
chr1	2322250	2324955	2706	chr1	2507996	2510952	2957	185871	3.44292	4.03292	3.53119	0.0602246
chr1	2322250	2324955	2706	chr1	2515688	2518612	2925	193547	-3.45343	4.17205	2.92956	0.0869714
chr1	2322250	2324955	2706	chr1	3580071	3585990	5920	1259428	-2.10967	3.88438	1.00111	0.317041
chr1	2322250	2324955	2706	chr1	3712111	3714336	2226	1389621	-2.10967	3.88438	1.00111	0.317041
chr1	2322250	2324955	2706	chr1	3773167	3776893	3727	1451427	-2.11484	3.88709	1.00394	0.31636
chr1	2330581	2333078	2498	chr1	2342909	2346095	3187	12672	0.51284	4.29165	0.147421	0.701013
chr1	2330581	2333078	2498	chr1	2476096	2481428	5333	146932	1.86352	4.29107	1.83506	0.175532
chr1	2330581	2333078	2498	chr1	2485419	2491852	6434	156806	2.57893	3.88376	1.80247	0.179414
chr1	2330581	2333078	2498	chr1	2507996	2510952	2957	177644	-2.93008	4.03414	1.97452	0.159969
chr1	2330581	2333078	2498	chr1	2515688	2518612	2925	185320	2.57893	3.88376	1.80247	0.179414
chr1	2330581	2333078	2498	chr1	3823388	3828922	5535	1494325	2.57893	3.88376	1.80247	0.179414
chr1	2342909	2346095	3187	chr1	2424097	2429120	5024	82106	-2.11484	3.88709	1.00394	0.31636
chr1	2342909	2346095	3187	chr1	2476096	2481428	5333	134260	0.152662	5.27686	0.0362695	0.84896
chr1	2342909	2346095	3187	chr1	2485419	2491852	6434	144133	1.03813	4.40697	0.707525	0.400267
chr1	2342909	2346095	3187	chr1	2507996	2510952	2957	164972	0.519764	4.51179	0.203568	0.651856
chr1	2342909	2346095	3187	chr1	2515688	2518612	2925	172648	-0.159431	4.70037	0.0221209	0.881766
chr1	2342909	2346095	3187	chr1	2583251	2589641	6391	241944	-0.35115	4.16885	0.0525494	0.818685
chr1	2342909	2346095	3187	chr1	2876156	2878253	2098	532702	2.57893	3.88376	1.80247	0.179414
chr1	2342909	2346095	3187	chr1	2956703	2958169	1467	612934	-2.11484	3.88709	1.00394	0.31636
chr1	2342909	2346095	3187	chr1	3086303	3089275	2973	743287	2.57893	3.88376	1.80247	0.179414
chr1	2342909	2346095	3187	chr1	3580071	3585990	5920	1238528	-2.11484	3.88709	1.00394	0.31636
chr1	2342909	2346095	3187	chr1	3592833	3597063	4231	1250446	-2.10967	3.88438	1.00111	0.317041
chr1	2342909	2346095	3187	chr1	3609221	3613038	3818	1266627	2.57893	3.88376	1.80247	0.179414
chr1	2424097	2429120	5024	chr1	2476096	2481428	5333	52153	-0.0105104	4.40754	4.81688e-05	0.994462
chr1	2424097	2429120	5024	chr1	2485419	2491852	6434	62027	2.57893	3.88376	1.80247	0.179414
chr1	2424097	2429120	5024	chr1	2507996	2510952	2957	82865	-2.11484	3.88709	1.00394	0.31636
chr1	2424097	2429120	5024	chr1	2515688	2518612	2925	90541	2.57893	3.88376	1.80247	0.179414
chr1	2424097	2429120	5024	chr1	3580071	3585990	5920	1156422	-2.10967	3.88438	1.00111	0.317041
chr1	2476096	2481428	5333	chr1	2485419	2491852	6434	9873	-1.58938	5.66332	3.79063	0.0515403
chr1	2476096	2481428	5333	chr1	2507996	2510952	2957	30712	0.761573	4.94318	0.686147	0.407478
chr1	2476096	2481428	5333	chr1	2515688	2518612	2925	38388	-0.562146	5.59203	0.55614	0.45582
chr1	2476096	2481428	5333	chr1	2583251	2589641	6391	107684	2.57893	3.88376	1.80247	0.179414
chr1	2476096	2481428	5333	chr1	2868473	2870791	2319	390870	-2.11484	3.88709	1.00394	0.31636
chr1	2476096	2481428	5333	chr1	3086303	3089275	2973	609027	2.57893	3.88376	1.80247	0.179414
chr1	2476096	2481428	5333	chr1	3136633	3140314	3682	659711	-2.10967	3.88438	1.00111	0.317041
chr1	2476096	2481428	5333	chr1	3207352	3208953	1602	729390	2.57893	3.88376	1.80247	0.179414
chr1	2476096	2481428	5333	chr1	3580071	3585990	5920	1104268	-3.45343	4.17205	2.92956	0.0869714
chr1	2476096	2481428	5333	chr1	3692430	3693851	1422	1214378	-2.11484	3.88709	1.00394	0.31636
chr1	2476096	2481428	5333	chr1	4085790	4089396	3607	1608831	-2.10967	3.88438	1.00111	0.317041
chr1	2476096	2481428	5333	chr1	4103577	4109107	5531	1627580	-2.11484	3.88709	1.00394	0.31636
chr1	2476096	2481428	5333	chr1	4368291	4373525	5235	1892146	2.57893	3.88376	1.80247	0.179414
chr1	2485419	2491852	6434	chr1	2507996	2510952	2957	20838	1.06569	4.8648	1.24257	0.264976
chr1	2485419	2491852	6434	chr1	2515688	2518612	2925	28514	-2.029	4.711	2.62467	0.105214
chr1	2485419	2491852	6434	chr1	2956703	2958169	1467	468800	2.57893	3.88376	1.80247	0.179414
chr1	2485419	2491852	6434	chr1	3207352	3208953	1602	719517	-2.10967	3.88438	1.00111	0.317041
chr1	2485419	2491852	6434	chr1	3258609	3260442	1834	770890	-2.11484	3.88709	1.00394	0.31636
chr1	2485419	2491852	6434	chr1	3818201	3822234	4034	1331582	-2.11484	3.88709	1.00394	0.31636
chr1	2507996	2510952	2957	chr1	2515688	2518612	2925	7676	-0.026326	5.73982	0.00133108	0.970897
chr1	2507996	2510952	2957	chr1	2868473	2870791	2319	360158	-2.10967	3.88438	1.00111	0.317041
chr1	2507996	2510952	2957	chr1	3349663	3352408	2746	841561	-2.11484	3.88709	1.00394	0.31636
chr1	2507996	2510952	2957	chr1	3580071	3585990	5920	1073556	0.53245	4.05736	0.0967166	0.755806
chr1	2507996	2510952	2957	chr1	3712111	3714336	2226	1203749	-2.11484	3.88709	1.00394	0.31636
chr1	2507996	2510952	2957	chr1	3818201	3822234	4034	1310743	-2.10967	3.88438	1.00111	0.317041
chr1	2507996	2510952	2957	chr1	3823388	3828922	5535	1316681	2.57893	3.88376	1.80247	0.179414
chr1	2515688	2518612	2925	chr1	2583251	2589641	6391	69296	2.57893	3.88376	1.80247	0.179414
chr1	2515688	2518612	2925	chr1	2868473	2870791	2319	352482	2.57893	3.88376	1.80247	0.179414
chr1	2515688	2518612	2925	chr1	2876156	2878253	2098	360054	-2.10967	3.88438	1.00111	0.317041
chr1	2515688	2518612	2925	chr1	3136633	3140314	3682	621323	-2.10967	3.88438	1.00111	0.317041
chr1	2515688	2518612	2925	chr1	3580071	3585990	5920	1065880	0.464089	4.03619	0.0775205	0.780686
chr1	2515688	2518612	2925	chr1	3818201	3822234	4034	1303067	-2.10967	3.88438	1.00111	0.317041
chr1	2515688	2518612	2925	chr1	3823388	3828922	5535	1309005	-2.11484	3.88709	1.00394	0.31636
chr1	2515688	2518612	2925	chr1	4130163	4132119	1957	1613991	-2.11484	3.88709	1.00394	0.31636
chr1	2583251	2589641	6391	chr1	4368291	4373525	5235	1784462	-2.10967	3.88438	1.00111	0.317041
chr1	2868473	2870791	2319	chr1	2876156	2878253	2098	7572	-0.356139	4.17145	0.0538612	0.816476
chr1	2868473	2870791	2319	chr1	3136633	3140314	3682	268841	-2.10967	3.88438	1.00111	0.317041
chr1	2868473	2870791	2319	chr1	3188757	3190610	1854	320051	-2.10967	3.88438	1.00111	0.317041
chr1	2868473	2870791	2319	chr1	3580071	3585990	5920	713398	-2.11484	3.88709	1.00394	0.31636
chr1	2868473	2870791	2319	chr1	3609221	3613038	3818	741497	-2.93507	4.03679	1.97986	0.159405
chr1	2868473	2870791	2319	chr1	3634945	3637593	2649	766637	2.64212	3.90778	1.85425	0.17329
chr1	2868473	2870791	2319	chr1	4085790	4089396	3607	1217961	2.57893	3.88376	1.80247	0.179414
chr1	2868473	2870791	2319	chr1	4854304	4858302	3999	1986671	-2.10967	3.88438	1.00111	0.317041
chr1	2876156	2878253	2098	chr1	3136633	3140314	3682	261269	2.57893	3.88376	1.80247	0.179414
chr1	2956703	2958169	1467	chr1	4368291	4373525	5235	1413472	2.57893	3.88376	1.80247	0.179414
chr1	3086303	3089275	2973	chr1	3136633	3140314	3682	50684	-2.11484	3.88709	1.00394	0.31636
chr1	3086303	3089275	2973	chr1	3258609	3260442	1834	171736	-2.93507	4.03679	1.97986	0.159405
chr1	3086303	3089275	2973	chr1	3349663	3352408	2746	263246	-2.10967	3.88438	1.00111	0.317041
chr1	3086303	3089275	2973	chr1	3512860	3517578	4719	427430	-2.10967	3.88438	1.00111	0.317041
chr1	3086303	3089275	2973	chr1	4368291	4373525	5235	1283119	2.57893	3.88376	1.80247	0.179414
chr1	3136633	3140314	3682	chr1	3512860	3517578	4719	376745	-2.11484	3.88709	1.00394	0.31636
chr1	3136633	3140314	3682	chr1	3580071	3585990	5920	444557	2.57893	3.88376	1.80247	0.179414
chr1	3136633	3140314	3682	chr1	3592833	3597063	4231	456474	-2.10967	3.88438	1.00111	0.317041
chr1	3136633	3140314	3682	chr1	4368291	4373525	5235	1232434	-2.93507	4.03679	1.97986	0.159405
chr1	3188757	3190610	1854	chr1	3207352	3208953	1602	18469	2.57893	3.88376	1.80247	0.179414
chr1	3188757	3190610	1854	chr1	4368291	4373525	5235	1181224	-2.11484	3.88709	1.00394	0.31636
chr1	3207352	3208953	1602	chr1	3258609	3260442	1834	51373	-2.11484	3.88709	1.00394	0.31636
chr1	3258609	3260442	1834	chr1	3349663	3352408	2746	91510	-2.10967	3.88438	1.00111	0.317041
chr1	3258609	3260442	1834	chr1	4117759	4119964	2206	859336	-2.11484	3.88709	1.00394	0.31636
chr1	3349663	3352408	2746	chr1	3580071	3585990	5920	231995	0.469252	4.03353	0.0789089	0.778781
chr1	3349663	3352408	2746	chr1	5289861	5292478	2618	1940134	2.57893	3.88376	1.80247	0.179414
chr1	3512860	3517578	4719	chr1	3580071	3585990	5920	67811	-4.38886	4.51842	5.66279	0.0173285
chr1	3512860	3517578	4719	chr1	3592833	3597063	4231	79729	2.57893	3.88376	1.80247	0.179414
chr1	3512860	3517578	4719	chr1	3823388	3828922	5535	310936	-2.11484	3.88709	1.00394	0.31636
chr1	3512860	3517578	4719	chr1	4386319	4389243	2925	872562	-2.11484	3.88709	1.00394	0.31636
chr1	3580071	3585990	5920	chr1	3592833	3597063	4231	11917	0.0388575	6.45363	0.00467628	0.94548
chr1	3580071	3585990	5920	chr1	3609221	3613038	3818	28099	0.0591267	5.01578	0.0045312	0.946332
chr1	3580071	3585990	5920	chr1	3634945	3637593	2649	53238	2.57893	3.88376	1.80247	0.179414
chr1	3580071	3585990	5920	chr1	3659008	3660572	1565	76759	1.04311	4.40446	0.713767	0.398196
chr1	3580071	3585990	5920	chr1	3692430	3693851	1422	110110	-2.93507	4.03679	1.97986	0.159405
chr1	3580071	3585990	5920	chr1	3712111	3714336	2226	130193	-0.356139	4.17145	0.0538612	0.816476
chr1	3580071	3585990	5920	chr1	3773167	3776893	3727	191999	-2.10967	3.88438	1.00111	0.317041
chr1	3580071	3585990	5920	chr1	3818201	3822234	4034	237187	-0.356139	4.17145	0.0538612	0.816476
chr1	3580071	3585990	5920	chr1	3823388	3828922	5535	243124	-0.698801	4.61468	0.364981	0.545753
chr1	3580071	3585990	5920	chr1	4085790	4089396	3607	504562	-2.93008	4.03414	1.97452	0.159969
chr1	3580071	3585990	5920	chr1	4093948	4095642	1695	511764	-2.11484	3.88709	1.00394	0.31636
chr1	3580071	3585990	5920	chr1	4103577	4109107	5531	523311	-0.8745	4.29479	0.369729	0.543152
chr1	3580071	3585990	5920	chr1	4117759	4119964	2206	535831	2.57893	3.88376	1.80247	0.179414
chr1	3580071	3585990	5920	chr1	4368291	4373525	5235	787877	-3.83305	4.29537	3.85462	0.0496092
chr1	3580071	3585990	5920	chr1	4386319	4389243	2925	804750	2.57893	3.88376	1.80247	0.179414
chr1	3580071	3585990	5920	chr1	4676653	4678992	2340	1094792	-2.11484	3.88709	1.00394	0.31636
chr1	3580071	3585990	5920	chr1	4854304	4858302	3999	1273272	-2.10967	3.88438	1.00111	0.317041
chr1	3580071	3585990	5920	chr1	4889467	4891868	2402	1307637	2.64212	3.90778	1.85425	0.17329
chr1	3580071	3585990	5920	chr1	5279062	5282592	3531	1697796	-2.11484	3.88709	1.00394	0.31636
chr1	3592833	3597063	4231	chr1	3609221	3613038	3818	16181	3.44292	4.03292	3.53119	0.0602246
chr1	3592833	3597063	4231	chr1	3634945	3637593	2649	41321	-2.93507	4.03679	1.97986	0.159405
chr1	3592833	3597063	4231	chr1	3659008	3660572	1565	64842	2.64212	3.90778	1.85425	0.17329
chr1	3592833	3597063	4231	chr1	4103577	4109107	5531	511394	-2.93008	4.03414	1.97452	0.159969
chr1	3592833	3597063	4231	chr1	4368291	4373525	5235	775960	-2.11484	3.88709	1.00394	0.31636
chr1	3592833	3597063	4231	chr1	4430853	4432433	1581	836695	-2.10967	3.88438	1.00111	0.317041
chr1	3609221	3613038	3818	chr1	4430853	4432433	1581	820513	2.57893	3.88376	1.80247	0.179414
chr1	3634945	3637593	2649	chr1	3823388	3828922	5535	189886	-2.10967	3.88438	1.00111	0.317041
chr1	3659008	3660572	1565	chr1	3773167	3776893	3727	115240	3.44292	4.03292	3.53119	0.0602246
chr1	3659008	3660572	1565	chr1	3823388	3828922	5535	166365	2.57893	3.88376	1.80247	0.179414
chr1	3659008	3660572	1565	chr1	4130163	4132119	1957	471351	-2.11484	3.88709	1.00394	0.31636
chr1	3692430	3693851	1422	chr1	3712111	3714336	2226	20083	3.44292	4.03292	3.53119	0.0602246
chr1	3692430	3693851	1422	chr1	3818201	3822234	4034	127077	0.469252	4.03353	0.0789089	0.778781
chr1	3692430	3693851	1422	chr1	3823388	3828922	5535	133014	-2.11484	3.88709	1.00394	0.31636
chr1	3692430	3693851	1422	chr1	4085790	4089396	3607	394452	-3.83305	4.29537	3.85462	0.0496092
chr1	3692430	3693851	1422	chr1	4103577	4109107	5531	413201	-2.11484	3.88709	1.00394	0.31636
chr1	3712111	3714336	2226	chr1	3773167	3776893	3727	61806	-0.35115	4.16885	0.0525494	0.818685
chr1	3712111	3714336	2226	chr1	3818201	3822234	4034	106994	-1.25412	4.40811	0.834135	0.36108
chr1	3712111	3714336	2226	chr1	3823388	3828922	5535	112931	-3.4486	4.16944	2.92196	0.0873815
chr1	3712111	3714336	2226	chr1	4085790	4089396	3607	374369	-0.0105104	4.40754	4.81688e-05	0.994462
chr1	3712111	3714336	2226	chr1	4103577	4109107	5531	393118	0.469252	4.03353	0.0789089	0.778781
chr1	3712111	3714336	2226	chr1	4368291	4373525	5235	657684	0.469252	4.03353	0.0789089	0.778781
chr1	3712111	3714336	2226	chr1	5279062	5282592	3531	1567603	-2.10967	3.88438	1.00111	0.317041
chr1	3712111	3714336	2226	chr1	5344541	5347392	2852	1632743	2.57893	3.88376	1.80247	0.179414
chr1	3773167	3776893	3727	chr1	3818201	3822234	4034	45187	-1.25412	4.40811	0.834135	0.36108
chr1	3773167	3776893	3727	chr1	3823388	3828922	5535	51125	-0.617558	4.86636	0.376782	0.539331
chr1	3773167	3776893	3727	chr1	4085790	4089396	3607	312563	2.57893	3.88376	1.80247	0.179414
chr1	3773167	3776893	3727	chr1	4093948	4095642	1695	319765	-2.10967	3.88438	1.00111	0.317041
chr1	3773167	3776893	3727	chr1	4103577	4109107	5531	331312	-2.10967	3.88438	1.00111	0.317041
chr1	3773167	3776893	3727	chr1	4200705	4202504	1800	426574	2.57893	3.88376	1.80247	0.179414
chr1	3773167	3776893	3727	chr1	4368291	4373525	5235	595878	-0.356139	4.17145	0.0538612	0.816476
chr1	3773167	3776893	3727	chr1	5279062	5282592	3531	1505797	-2.10967	3.88438	1.00111	0.317041
chr1	3818201	3822234	4034	chr1	3823388	3828922	5535	5937	-0.449689	7.00424	0.708137	0.400063
chr1	3818201	3822234	4034	chr1	4012176	4015095	2920	193418	-2.11484	3.88709	1.00394	0.31636
chr1	3818201	3822234	4034	chr1	4030840	4032167	1328	211286	-2.10967	3.88438	1.00111	0.317041
chr1	3818201	3822234	4034	chr1	4085790	4089396	3607	267375	0.209301	4.79235	0.0447703	0.832427
chr1	3818201	3822234	4034	chr1	4103577	4109107	5531	286124	-0.694248	4.61225	0.360433	0.548266
chr1	3818201	3822234	4034	chr1	4117759	4119964	2206	298644	-2.10967	3.88438	1.00111	0.317041
chr1	3818201	3822234	4034	chr1	4130163	4132119	1957	310923	-2.93507	4.03679	1.97986	0.159405
chr1	3818201	3822234	4034	chr1	4178687	4180859	2173	359555	-2.11484	3.88709	1.00394	0.31636
chr1	3818201	3822234	4034	chr1	4368291	4373525	5235	550690	-1.90028	5.15319	3.59417	0.0579826
chr1	3818201	3822234	4034	chr1	4386319	4389243	2925	567563	2.57893	3.88376	1.80247	0.179414
chr1	3818201	3822234	4034	chr1	4854304	4858302	3999	1036085	2.57893	3.88376	1.80247	0.179414
chr1	3818201	3822234	4034	chr1	4889467	4891868	2402	1070450	-2.93507	4.03679	1.97986	0.159405
chr1	3818201	3822234	4034	chr1	5279062	5282592	3531	1460609	3.44292	4.03292	3.53119	0.0602246
chr1	3818201	3822234	4034	chr1	5352846	5354433	1588	1533422	-2.10967	3.88438	1.00111	0.317041
chr1	3823388	3828922	5535	chr1	4012176	4015095	2920	187480	-3.45827	4.17466	2.93719	0.0865614
chr1	3823388	3828922	5535	chr1	4030840	4032167	1328	205348	1.04311	4.40446	0.713767	0.398196
chr1	3823388	3828922	5535	chr1	4085790	4089396	3607	261438	1.12649	5.53603	2.25597	0.1331
chr1	3823388	3828922	5535	chr1	4093948	4095642	1695	268640	2.24591	4.40389	2.97355	0.0846358
chr1	3823388	3828922	5535	chr1	4103577	4109107	5531	280187	1.38477	5.77649	3.99162	0.0457271
chr1	3823388	3828922	5535	chr1	4117759	4119964	2206	292706	0.902154	4.60873	0.686877	0.407229
chr1	3823388	3828922	5535	chr1	4122364	4124194	1831	297124	1.33324	4.16825	0.807817	0.368766
chr1	3823388	3828922	5535	chr1	4130163	4132119	1957	304986	-2.11484	3.88709	1.00394	0.31636
chr1	3823388	3828922	5535	chr1	4178687	4180859	2173	353618	2.57893	3.88376	1.80247	0.179414
chr1	3823388	3828922	5535	chr1	4200705	4202504	1800	375449	-2.93008	4.03414	1.97452	0.159969
chr1	3823388	3828922	5535	chr1	4221357	4222672	1316	395859	3.44292	4.03292	3.53119	0.0602246
chr1	3823388	3828922	5535	chr1	4368291	4373525	5235	544753	-1.12037	5.79015	2.24529	0.134021
chr1	3823388	3828922	5535	chr1	4386319	4389243	2925	561626	-0.0105104	4.40754	4.81688e-05	0.994462
chr1	3823388	3828922	5535	chr1	4403344	4405272	1929	578153	0.469252	4.03353	0.0789089	0.778781
chr1	3823388	3828922	5535	chr1	4430853	4432433	1581	605488	-0.35115	4.16885	0.0525494	0.818685
chr1	3823388	3828922	5535	chr1	4614027	4615499	1473	788608	2.57893	3.88376	1.80247	0.179414
chr1	3823388	3828922	5535	chr1	4676653	4678992	2340	851667	3.97319	4.16766	5.19251	0.0226845
chr1	3823388	3828922	5535	chr1	4854304	4858302	3999	1030148	-2.10967	3.88438	1.00111	0.317041
chr1	3823388	3828922	5535	chr1	4933513	4935132	1620	1108167	-2.11484	3.88709	1.00394	0.31636
chr1	3823388	3828922	5535	chr1	5279062	5282592	3531	1454672	-2.93507	4.03679	1.97986	0.159405
chr1	3823388	3828922	5535	chr1	5289861	5292478	2618	1465014	2.57893	3.88376	1.80247	0.179414
chr1	3823388	3828922	5535	chr1	5344541	5347392	2852	1519811	2.57893	3.88376	1.80247	0.179414
chr1	3823388	3828922	5535	chr1	5352846	5354433	1588	1527484	-2.10967	3.88438	1.00111	0.317041
chr1	4012176	4015095	2920	chr1	4085790	4089396	3607	73957	3.44292	4.03292	3.53119	0.0602246
chr1	4012176	4015095	2920	chr1	4103577	4109107	5531	92706	0.469252	4.03353	0.0789089	0.778781
chr1	4030840	4032167	1328	chr1	4103577	4109107	5531	74838	2.57893	3.88376	1.80247	0.179414
chr1	4030840	4032167	1328	chr1	4221357	4222672	1316	190511	-2.10967	3.88438	1.00111	0.317041
chr1	4030840	4032167	1328	chr1	4368291	4373525	5235	339404	0.469252	4.03353	0.0789089	0.778781
chr1	4030840	4032167	1328	chr1	5545127	5548302	3176	1515211	-2.10967	3.88438	1.00111	0.317041
chr1	4085790	4089396	3607	chr1	4093948	4095642	1695	7202	-0.163982	5.90308	0.0584436	0.808973
chr1	4085790	4089396	3607	chr1	4103577	4109107	5531	18749	-0.298731	6.64142	0.281399	0.595786
chr1	4085790	4089396	3607	chr1	4117759	4119964	2206	31268	-0.0105104	4.40754	4.81688e-05	0.994462
chr1	4085790	4089396	3607	chr1	4122364	4124194	1831	35686	-0.356139	4.17145	0.0538612	0.816476
chr1	4085790	4089396	3607	chr1	4130163	4132119	1957	43548	-2.93507	4.03679	1.97986	0.159405
chr1	4085790	4089396	3607	chr1	4178687	4180859	2173	92180	2.57893	3.88376	1.80247	0.179414
chr1	4085790	4089396	3607	chr1	4221357	4222672	1316	134421	-2.94007	4.03946	1.98523	0.15884
chr1	4085790	4089396	3607	chr1	4368291	4373525	5235	283315	0.503306	4.87455	0.280022	0.596687
chr1	4085790	4089396	3607	chr1	4386319	4389243	2925	300188	2.57893	3.88376	1.80247	0.179414
chr1	4085790	4089396	3607	chr1	4403344	4405272	1929	316715	-2.11484	3.88709	1.00394	0.31636
chr1	4085790	4089396	3607	chr1	4676653	4678992	2340	590229	2.57893	3.88376	1.80247	0.179414
chr1	4085790	4089396	3607	chr1	4933513	4935132	1620	846729	-2.11484	3.88709	1.00394	0.31636
chr1	4085790	4089396	3607	chr1	5279062	5282592	3531	1193234	0.464089	4.03619	0.0775205	0.780686
chr1	4085790	4089396	3607	chr1	5739805	5741698	1894	1653158	2.57893	3.88376	1.80247	0.179414
chr1	4085790	4089396	3607	chr1	6068456	6070174	1719	1981722	-2.10967	3.88438	1.00111	0.317041
chr1	4093948	4095642	1695	chr1	4103577	4109107	5531	11547	-0.000651718	5.33805	2.67649e-06	0.998695
chr1	4093948	4095642	1695	chr1	4117759	4119964	2206	24066	2.57893	3.88376	1.80247	0.179414
chr1	4093948	4095642	1695	chr1	4130163	4132119	1957	36346	0.469252	4.03353	0.0789089	0.778781
chr1	4093948	4095642	1695	chr1	4368291	4373525	5235	276113	2.57893	3.88376	1.80247	0.179414
chr1	4093948	4095642	1695	chr1	4676653	4678992	2340	583027	2.57893	3.88376	1.80247	0.179414
chr1	4103577	4109107	5531	chr1	4117759	4119964	2206	12519	-0.669635	5.49449	0.729022	0.3932
chr1	4103577	4109107	5531	chr1	4122364	4124194	1831	16937	-1.25881	4.41063	0.840087	0.359372
chr1	4103577	4109107	5531	chr1	4130163	4132119	1957	24799	-3.82838	4.29281	3.84501	0.0498944
chr1	4103577	4109107	5531	chr1	4221357	4222672	1316	115672	2.57893	3.88376	1.80247	0.179414
chr1	4103577	4109107	5531	chr1	4368291	4373525	5235	264566	-0.703364	4.61711	0.36957	0.543239
chr1	4103577	4109107	5531	chr1	4386319	4389243	2925	281439	2.57893	3.88376	1.80247	0.179414
chr1	4103577	4109107	5531	chr1	4676653	4678992	2340	571480	-2.10967	3.88438	1.00111	0.317041
chr1	4103577	4109107	5531	chr1	4910110	4912598	2489	805012	2.57893	3.88376	1.80247	0.179414
chr1	4103577	4109107	5531	chr1	5279062	5282592	3531	1174485	0.469252	4.03353	0.0789089	0.778781
chr1	4103577	4109107	5531	chr1	5289861	5292478	2618	1184827	2.57893	3.88376	1.80247	0.179414
chr1	4117759	4119964	2206	chr1	4221357	4222672	1316	103153	-2.10967	3.88438	1.00111	0.317041
chr1	4117759	4119964	2206	chr1	5279062	5282592	3531	1161965	-2.11484	3.88709	1.00394	0.31636
chr1	4122364	4124194	1831	chr1	4368291	4373525	5235	247629	-2.93008	4.03414	1.97452	0.159969
chr1	4122364	4124194	1831	chr1	5352846	5354433	1588	1230360	2.57893	3.88376	1.80247	0.179414
chr1	4130163	4132119	1957	chr1	4368291	4373525	5235	239767	0.527287	4.06005	0.0951824	0.757689
chr1	4130163	4132119	1957	chr1	4386319	4389243	2925	256640	-2.11484	3.88709	1.00394	0.31636
chr1	4130163	4132119	1957	chr1	4430853	4432433	1581	300502	-2.10967	3.88438	1.00111	0.317041
chr1	4130163	4132119	1957	chr1	5289861	5292478	2618	1160028	2.64212	3.90778	1.85425	0.17329
chr1	4200705	4202504	1800	chr1	4221357	4222672	1316	20410	2.57893	3.88376	1.80247	0.179414
chr1	4200705	4202504	1800	chr1	4368291	4373525	5235	169303	-2.10967	3.88438	1.00111	0.317041
chr1	4200705	4202504	1800	chr1	4430853	4432433	1581	230038	-2.10967	3.88438	1.00111	0.317041
chr1	4221357	4222672	1316	chr1	4368291	4373525	5235	148893	-0.35115	4.16885	0.0525494	0.818685
chr1	4368291	4373525	5235	chr1	4386319	4389243	2925	16873	-1.47956	5.54227	3.2013	0.0735799
chr1	4368291	4373525	5235	chr1	4403344	4405272	1929	33400	-4.13717	4.4112	4.76797	0.0289939
chr1	4368291	4373525	5235	chr1	4430853	4432433	1581	60735	-0.8745	4.29479	0.369729	0.543152
chr1	4368291	4373525	5235	chr1	4676653	4678992	2340	306914	-2.93507	4.03679	1.97986	0.159405
chr1	4368291	4373525	5235	chr1	4854304	4858302	3999	485395	2.57893	3.88376	1.80247	0.179414
chr1	4368291	4373525	5235	chr1	4889467	4891868	2402	519759	-2.10967	3.88438	1.00111	0.317041
chr1	4368291	4373525	5235	chr1	5279062	5282592	3531	909919	-3.45827	4.17466	2.93719	0.0865614
chr1	4368291	4373525	5235	chr1	5289861	5292478	2618	920261	-2.11484	3.88709	1.00394	0.31636
chr1	4368291	4373525	5235	chr1	5507668	5510995	3328	1138423	-2.10967	3.88438	1.00111	0.317041
chr1	4368291	4373525	5235	chr1	6050953	6055868	4916	1682502	-2.10967	3.88438	1.00111	0.317041
chr1	4368291	4373525	5235	chr1	6084239	6089293	5055	1715858	2.57893	3.88376	1.80247	0.179414
chr1	4368291	4373525	5235	chr1	6258289	6261264	2976	1888868	-2.10967	3.88438	1.00111	0.317041
chr1	4386319	4389243	2925	chr1	4403344	4405272	1929	16527	0.469252	4.03353	0.0789089	0.778781
chr1	4403344	4405272	1929	chr1	4430853	4432433	1581	27335	-2.93507	4.03679	1.97986	0.159405
chr1	4430853	4432433	1581	chr1	4478194	4479867	1674	47387	2.57893	3.88376	1.80247	0.179414
chr1	4430853	4432433	1581	chr1	5352846	5354433	1588	921996	2.57893	3.88376	1.80247	0.179414
chr1	4614027	4615499	1473	chr1	4854304	4858302	3999	241540	2.57893	3.88376	1.80247	0.179414
chr1	4854304	4858302	3999	chr1	4889467	4891868	2402	34364	-2.10967	3.88438	1.00111	0.317041
chr1	4854304	4858302	3999	chr1	5279062	5282592	3531	424524	-2.10967	3.88438	1.00111	0.317041
chr1	4854304	4858302	3999	chr1	5507668	5510995	3328	653028	-2.11484	3.88709	1.00394	0.31636
chr1	4889467	4891868	2402	chr1	5279062	5282592	3531	390159	-2.10967	3.88438	1.00111	0.317041
chr1	4889467	4891868	2402	chr1	6084239	6089293	5055	1196098	2.57893	3.88376	1.80247	0.179414
chr1	4910110	4912598	2489	chr1	5279062	5282592	3531	369473	2.57893	3.88376	1.80247	0.179414
chr1	5279062	5282592	3531	chr1	5289861	5292478	2618	10342	-0.159431	4.70037	0.0221209	0.881766
chr1	5279062	5282592	3531	chr1	5344541	5347392	2852	65139	-2.11484	3.88709	1.00394	0.31636
chr1	5279062	5282592	3531	chr1	5352846	5354433	1588	72812	-2.11484	3.88709	1.00394	0.31636
chr1	5279062	5282592	3531	chr1	5545127	5548302	3176	265887	-2.10967	3.88438	1.00111	0.317041
chr1	5279062	5282592	3531	chr1	5570609	5571931	1323	290443	0.469252	4.03353	0.0789089	0.778781
chr1	5279062	5282592	3531	chr1	6258289	6261264	2976	978949	-2.10967	3.88438	1.00111	0.317041
chr1	5279062	5282592	3531	chr1	6294172	6297179	3008	1014848	-2.11484	3.88709	1.00394	0.31636
chr1	5289861	5292478	2618	chr1	5344541	5347392	2852	54797	2.57893	3.88376	1.80247	0.179414
chr1	5289861	5292478	2618	chr1	6012523	6014482	1960	722333	-2.10967	3.88438	1.00111	0.317041
chr1	5344541	5347392	2852	chr1	7291206	7293469	2264	1946371	-2.10967	3.88438	1.00111	0.317041
chr1	5352846	5354433	1588	chr1	5507668	5510995	3328	155692	-2.10967	3.88438	1.00111	0.317041
chr1	5352846	5354433	1588	chr1	5684098	5685490	1393	331154	2.57893	3.88376	1.80247	0.179414
chr1	5507668	5510995	3328	chr1	5545127	5548302	3176	37383	2.57893	3.88376	1.80247	0.179414
chr1	5545127	5548302	3176	chr1	5739805	5741698	1894	194037	2.57893	3.88376	1.80247	0.179414
chr1	5739805	5741698	1894	chr1	6549021	6552107	3087	809812	-2.10967	3.88438	1.00111	0.317041
chr1	5971162	5972390	1229	chr1	6050953	6055868	4916	81634	-2.11484	3.88709	1.00394	0.31636
chr1	6050953	6055868	4916	chr1	6068456	6070174	1719	15904	4.35558	4.29048	6.79194	0.00915706
chr1	6050953	6055868	4916	chr1	6084239	6089293	5055	33355	1.25755	4.72203	1.44833	0.228797
chr1	6050953	6055868	4916	chr1	6258289	6261264	2976	206366	-0.35115	4.16885	0.0525494	0.818685
chr1	6050953	6055868	4916	chr1	6369083	6371298	2216	316780	-2.10967	3.88438	1.00111	0.317041
chr1	6068456	6070174	1719	chr1	6084239	6089293	5055	17451	2.57893	3.88376	1.80247	0.179414
chr1	6068456	6070174	1719	chr1	6393489	6395463	1975	325161	-2.10967	3.88438	1.00111	0.317041
chr1	6084239	6089293	5055	chr1	6258289	6261264	2976	173010	-3.4486	4.16944	2.92196	0.0873815
chr1	6084239	6089293	5055	chr1	6451765	6456407	4643	367320	1.33324	4.16825	0.807817	0.368766
chr1	6084239	6089293	5055	chr1	6549021	6552107	3087	463798	-0.356139	4.17145	0.0538612	0.816476
chr1	6084239	6089293	5055	chr1	6619669	6621436	1768	533786	-2.10967	3.88438	1.00111	0.317041
chr1	6084239	6089293	5055	chr1	6760278	6762628	2351	674687	-2.10967	3.88438	1.00111	0.317041
chr1	6084239	6089293	5055	chr1	7425693	7429307	3615	1340734	-2.10967	3.88438	1.00111	0.317041
chr1	6084239	6089293	5055	chr1	7830238	7832606	2369	1744656	2.57893	3.88376	1.80247	0.179414
chr1	6258289	6261264	2976	chr1	6294172	6297179	3008	35899	-1.5537	4.51291	1.37696	0.24062
chr1	6258289	6261264	2976	chr1	6393489	6395463	1975	134699	-2.11484	3.88709	1.00394	0.31636
chr1	6258289	6261264	2976	chr1	6451765	6456407	4643	194309	-2.93507	4.03679	1.97986	0.159405
chr1	6258289	6261264	2976	chr1	6549021	6552107	3087	290787	-2.11484	3.88709	1.00394	0.31636
chr1	6258289	6261264	2976	chr1	6638483	6641497	3015	380213	-2.10967	3.88438	1.00111	0.317041
chr1	6258289	6261264	2976	chr1	6672448	6674866	2419	413880	0.469252	4.03353	0.0789089	0.778781
chr1	6258289	6261264	2976	chr1	6843325	6847408	4084	585590	-2.10967	3.88438	1.00111	0.317041
chr1	6294172	6297179	3008	chr1	6549021	6552107	3087	254888	-0.8745	4.29479	0.369729	0.543152
chr1	6294172	6297179	3008	chr1	6628968	6632079	3112	334848	-0.361142	4.17406	0.0551936	0.814261
chr1	6294172	6297179	3008	chr1	6835405	6838836	3432	541445	-2.11484	3.88709	1.00394	0.31636
chr1	6294172	6297179	3008	chr1	6843325	6847408	4084	549691	2.64212	3.90778	1.85425	0.17329
chr1	6294172	6297179	3008	chr1	7425693	7429307	3615	1131824	-2.94007	4.03946	1.98523	0.15884
chr1	6294172	6297179	3008	chr1	7464215	7468836	4622	1170850	-2.10967	3.88438	1.00111	0.317041
chr1	6369083	6371298	2216	chr1	6393489	6395463	1975	24285	-2.11484	3.88709	1.00394	0.31636
chr1	6393489	6395463	1975	chr1	6843325	6847408	4084	450890	-2.10967	3.88438	1.00111	0.317041
chr1	6451765	6456407	4643	chr1	6549021	6552107	3087	96478	4.03296	4.19128	5.33103	0.020949
chr1	6451765	6456407	4643	chr1	6613194	6615994	2801	160508	2.57893	3.88376	1.80247	0.179414
chr1	6451765	6456407	4643	chr1	6628968	6632079	3112	176437	-2.10967	3.88438	1.00111	0.317041
chr1	6451765	6456407	4643	chr1	6638483	6641497	3015	185904	-2.93008	4.03414	1.97452	0.159969
chr1	6549021	6552107	3087	chr1	6613194	6615994	2801	64030	-2.10967	3.88438	1.00111	0.317041
chr1	6549021	6552107	3087	chr1	6619669	6621436	1768	69988	0.469252	4.03353	0.0789089	0.778781
chr1	6549021	6552107	3087	chr1	6628968	6632079	3112	79959	-2.11484	3.88709	1.00394	0.31636
chr1	6549021	6552107	3087	chr1	6638483	6641497	3015	89426	-2.10967	3.88438	1.00111	0.317041
chr1	6549021	6552107	3087	chr1	6672448	6674866	2419	123093	-2.11484	3.88709	1.00394	0.31636
chr1	6549021	6552107	3087	chr1	6760278	6762628	2351	210889	-2.11484	3.88709	1.00394	0.31636
chr1	6549021	6552107	3087	chr1	6835405	6838836	3432	286556	-2.11484	3.88709	1.00394	0.31636
chr1	6549021	6552107	3087	chr1	7464215	7468836	4622	915961	-2.10967	3.88438	1.00111	0.317041
chr1	6549021	6552107	3087	chr1	7731234	7732718	1485	1181412	-2.11484	3.88709	1.00394	0.31636
chr1	6613194	6615994	2801	chr1	6619669	6621436	1768	5958	-2.029	4.711	2.62467	0.105214
chr1	6613194	6615994	2801	chr1	6628968	6632079	3112	15929	0.502848	4.29677	0.142344	0.705962
chr1	6613194	6615994	2801	chr1	6638483	6641497	3015	25396	-0.333402	4.53796	0.0785321	0.779297
chr1	6613194	6615994	2801	chr1	6645754	6648786	3033	32676	-2.93507	4.03679	1.97986	0.159405
chr1	6613194	6615994	2801	chr1	6672448	6674866	2419	59063	1.33324	4.16825	0.807817	0.368766
chr1	6613194	6615994	2801	chr1	6760278	6762628	2351	146859	3.44292	4.03292	3.53119	0.0602246
chr1	6613194	6615994	2801	chr1	6830978	6832732	1755	217261	-2.11484	3.88709	1.00394	0.31636
chr1	6613194	6615994	2801	chr1	6835405	6838836	3432	222526	0.464089	4.03619	0.0775205	0.780686
chr1	6613194	6615994	2801	chr1	8020746	8023080	2335	1407319	2.57893	3.88376	1.80247	0.179414
chr1	6613194	6615994	2801	chr1	8482716	8491398	8683	1872463	2.57893	3.88376	1.80247	0.179414
chr1	6613194	6615994	2801	chr1	8571752	8573613	1862	1958088	-2.10967	3.88438	1.00111	0.317041
chr1	6613194	6615994	2801	chr1	8588985	8594769	5785	1977283	-2.11484	3.88709	1.00394	0.31636
chr1	6619669	6621436	1768	chr1	6628968	6632079	3112	9971	1.33324	4.16825	0.807817	0.368766
chr1	6619669	6621436	1768	chr1	6638483	6641497	3015	19437	1.41551	4.5137	1.47338	0.224814
chr1	6619669	6621436	1768	chr1	6645754	6648786	3033	26717	-2.10967	3.88438	1.00111	0.317041
chr1	6619669	6621436	1768	chr1	6672448	6674866	2419	53104	-2.11484	3.88709	1.00394	0.31636
chr1	6619669	6621436	1768	chr1	6843325	6847408	4084	224814	-2.10967	3.88438	1.00111	0.317041
chr1	6619669	6621436	1768	chr1	8482716	8491398	8683	1866504	0.464089	4.03619	0.0775205	0.780686
chr1	6619669	6621436	1768	chr1	8588985	8594769	5785	1971324	2.57893	3.88376	1.80247	0.179414
chr1	6628968	6632079	3112	chr1	6638483	6641497	3015	9466	0.111653	5.04015	0.0151469	0.902049
chr1	6628968	6632079	3112	chr1	6645754	6648786	3033	16746	-2.10967	3.88438	1.00111	0.317041
chr1	6628968	6632079	3112	chr1	6672448	6674866	2419	43133	0.469252	4.03353	0.0789089	0.778781
chr1	6638483	6641497	3015	chr1	6645754	6648786	3033	7280	0.120335	5.14908	0.0204768	0.886213
chr1	6638483	6641497	3015	chr1	6672448	6674866	2419	33667	-2.10967	3.88438	1.00111	0.317041
chr1	6638483	6641497	3015	chr1	6760278	6762628	2351	121463	-2.10967	3.88438	1.00111	0.317041
chr1	6638483	6641497	3015	chr1	6843325	6847408	4084	205376	-2.10967	3.88438	1.00111	0.317041
chr1	6638483	6641497	3015	chr1	7425693	7429307	3615	787510	2.57893	3.88376	1.80247	0.179414
chr1	6638483	6641497	3015	chr1	8455311	8459760	4450	1817545	-2.11484	3.88709	1.00394	0.31636
chr1	6638483	6641497	3015	chr1	8482716	8491398	8683	1847067	-2.11484	3.88709	1.00394	0.31636
chr1	6645754	6648786	3033	chr1	8482716	8491398	8683	1839787	2.57893	3.88376	1.80247	0.179414
chr1	6760278	6762628	2351	chr1	6830978	6832732	1755	70402	-2.11484	3.88709	1.00394	0.31636
chr1	6760278	6762628	2351	chr1	6835405	6838836	3432	75667	1.32808	4.17086	0.802402	0.370376
chr1	6760278	6762628	2351	chr1	6843325	6847408	4084	83913	3.44292	4.03292	3.53119	0.0602246
chr1	6830978	6832732	1755	chr1	6835405	6838836	3432	5265	-2.93008	4.03414	1.97452	0.159969
chr1	6830978	6832732	1755	chr1	6843325	6847408	4084	13511	0.464089	4.03619	0.0775205	0.780686
chr1	6830978	6832732	1755	chr1	7830238	7832606	2369	999567	-2.10967	3.88438	1.00111	0.317041
chr1	6830978	6832732	1755	chr1	8553728	8557763	4036	1723890	2.57893	3.88376	1.80247	0.179414
chr1	6835405	6838836	3432	chr1	6843325	6847408	4084	8246	-1.26083	5.1592	1.81787	0.177567
chr1	6835405	6838836	3432	chr1	7464215	7468836	4622	629405	2.57893	3.88376	1.80247	0.179414
chr1	6835405	6838836	3432	chr1	8482716	8491398	8683	1649936	-2.10967	3.88438	1.00111	0.317041
chr1	6843325	6847408	4084	chr1	6910884	6912280	1397	66215	2.57893	3.88376	1.80247	0.179414
chr1	6843325	6847408	4084	chr1	7437756	7439492	1737	593257	0.469252	4.03353	0.0789089	0.778781
chr1	6843325	6847408	4084	chr1	8020746	8023080	2335	1176546	2.64212	3.90778	1.85425	0.17329
chr1	6843325	6847408	4084	chr1	8482716	8491398	8683	1641690	2.57893	3.88376	1.80247	0.179414
chr1	6843325	6847408	4084	chr1	8578185	8580291	2107	1733871	-2.11484	3.88709	1.00394	0.31636
chr1	6843325	6847408	4084	chr1	8588985	8594769	5785	1746510	2.57893	3.88376	1.80247	0.179414
chr1	7291206	7293469	2264	chr1	7642476	7644294	1819	351047	-2.10967	3.88438	1.00111	0.317041
chr1	7425693	7429307	3615	chr1	7437756	7439492	1737	11124	-3.45827	4.17466	2.93719	0.0865614
chr1	7425693	7429307	3615	chr1	7464215	7468836	4622	39025	-2.93507	4.03679	1.97986	0.159405
chr1	7425693	7429307	3615	chr1	8553728	8557763	4036	1128245	-2.10967	3.88438	1.00111	0.317041
chr1	7425693	7429307	3615	chr1	8578185	8580291	2107	1151738	-2.11484	3.88709	1.00394	0.31636
chr1	7425693	7429307	3615	chr1	8937383	8940454	3072	1511418	-2.10967	3.88438	1.00111	0.317041
chr1	7437756	7439492	1737	chr1	7464215	7468836	4622	27901	0.464089	4.03619	0.0775205	0.780686
chr1	7464215	7468836	4622	chr1	7830238	7832606	2369	364896	0.469252	4.03353	0.0789089	0.778781
chr1	7464215	7468836	4622	chr1	8532404	8534809	2406	1067081	-2.11484	3.88709	1.00394	0.31636
chr1	7464215	7468836	4622	chr1	8553728	8557763	4036	1089220	-2.10967	3.88438	1.00111	0.317041
chr1	7464215	7468836	4622	chr1	8814917	8816746	1830	1349306	2.57893	3.88376	1.80247	0.179414
chr1	7504017	7505350	1334	chr1	8482716	8491398	8683	982373	-2.10967	3.88438	1.00111	0.317041
chr1	7540830	7542292	1463	chr1	9067242	9072046	4805	1528083	-2.10967	3.88438	1.00111	0.317041
chr1	7634071	7636000	1930	chr1	7642476	7644294	1819	8349	-2.11484	3.88709	1.00394	0.31636
chr1	7634071	7636000	1930	chr1	9137906	9143657	5752	1505746	2.57893	3.88376	1.80247	0.179414
chr1	7634071	7636000	1930	chr1	9472046	9475771	3726	1838873	-2.10967	3.88438	1.00111	0.317041
chr1	7642476	7644294	1819	chr1	8553728	8557763	4036	912360	-2.11484	3.88709	1.00394	0.31636
chr1	7731234	7732718	1485	chr1	7927631	7930431	2801	197055	-2.10967	3.88438	1.00111	0.317041
chr1	7731234	7732718	1485	chr1	8876111	8879195	3085	1145677	2.57893	3.88376	1.80247	0.179414
chr1	7830238	7832606	2369	chr1	8020746	8023080	2335	190491	2.57893	3.88376	1.80247	0.179414
chr1	7830238	7832606	2369	chr1	8482716	8491398	8683	655635	-2.10967	3.88438	1.00111	0.317041
chr1	7830238	7832606	2369	chr1	8584306	8586445	2140	753953	2.57893	3.88376	1.80247	0.179414
chr1	7830238	7832606	2369	chr1	8823467	8826204	2738	993413	-2.11484	3.88709	1.00394	0.31636
chr1	7830238	7832606	2369	chr1	8876111	8879195	3085	1046231	2.57893	3.88376	1.80247	0.179414
chr1	7830238	7832606	2369	chr1	9126987	9130377	3391	1297260	-2.11484	3.88709	1.00394	0.31636
chr1	7830238	7832606	2369	chr1	9137906	9143657	5752	1309359	-2.10967	3.88438	1.00111	0.317041
chr1	8012463	8015329	2867	chr1	8020746	8023080	2335	8017	1.85835	4.29362	1.82579	0.176626
chr1	8012463	8015329	2867	chr1	8482716	8491398	8683	473161	-2.10967	3.88438	1.00111	0.317041
chr1	8012463	8015329	2867	chr1	8588985	8594769	5785	577981	0.469252	4.03353	0.0789089	0.778781
chr1	8012463	8015329	2867	chr1	8702050	8705760	3711	690009	2.64212	3.90778	1.85425	0.17329
chr1	8012463	8015329	2867	chr1	8876111	8879195	3085	863757	0.464089	4.03619	0.0775205	0.780686
chr1	8020746	8023080	2335	chr1	8482716	8491398	8683	465144	-2.10967	3.88438	1.00111	0.317041
chr1	8020746	8023080	2335	chr1	8532404	8534809	2406	511693	-2.11484	3.88709	1.00394	0.31636
chr1	8020746	8023080	2335	chr1	8571752	8573613	1862	550769	-2.11484	3.88709	1.00394	0.31636
chr1	8020746	8023080	2335	chr1	8823467	8826204	2738	802922	2.57893	3.88376	1.80247	0.179414
chr1	8020746	8023080	2335	chr1	8876111	8879195	3085	855740	-2.10967	3.88438	1.00111	0.317041
chr1	8020746	8023080	2335	chr1	9126987	9130377	3391	1106769	-2.10967	3.88438	1.00111	0.317041
chr1	8020746	8023080	2335	chr1	9134858	9136911	2054	1113971	2.64212	3.90778	1.85425	0.17329
chr1	8020746	8023080	2335	chr1	10009103	10012132	3030	1988704	-2.11484	3.88709	1.00394	0.31636
chr1	8076139	8077770	1632	chr1	8588985	8594769	5785	514922	3.50433	4.05674	3.62885	0.0567861
chr1	8076139	8077770	1632	chr1	9067242	9072046	4805	992689	-2.10967	3.88438	1.00111	0.317041
chr1	8076139	8077770	1632	chr1	9472046	9475771	3726	1396954	-2.10967	3.88438	1.00111	0.317041
chr1	8401782	8404603	2822	chr1	8455311	8459760	4450	54343	-2.11484	3.88709	1.00394	0.31636
chr1	8401782	8404603	2822	chr1	8532404	8534809	2406	130414	-2.10967	3.88438	1.00111	0.317041
chr1	8401782	8404603	2822	chr1	8588985	8594769	5785	188684	3.44292	4.03292	3.53119	0.0602246
chr1	8401782	8404603	2822	chr1	10009103	10012132	3030	1607425	2.57893	3.88376	1.80247	0.179414
chr1	8426022	8428484	2463	chr1	8455311	8459760	4450	30282	-1.25412	4.40811	0.834135	0.36108
chr1	8426022	8428484	2463	chr1	8482716	8491398	8683	59804	-1.25412	4.40811	0.834135	0.36108
chr1	8426022	8428484	2463	chr1	8532404	8534809	2406	106353	2.57893	3.88376	1.80247	0.179414
chr1	8426022	8428484	2463	chr1	8553728	8557763	4036	128492	0.502848	4.29677	0.142344	0.705962
chr1	8426022	8428484	2463	chr1	8571752	8573613	1862	145429	2.57893	3.88376	1.80247	0.179414
chr1	8426022	8428484	2463	chr1	8584306	8586445	2140	158122	-2.10967	3.88438	1.00111	0.317041
chr1	8426022	8428484	2463	chr1	8588985	8594769	5785	164624	-0.361142	4.17406	0.0551936	0.814261
chr1	8426022	8428484	2463	chr1	8689051	8690482	1432	262513	-2.11484	3.88709	1.00394	0.31636
chr1	8426022	8428484	2463	chr1	8760141	8763768	3628	334701	-2.11484	3.88709	1.00394	0.31636
chr1	8426022	8428484	2463	chr1	9134858	9136911	2054	708631	-2.11484	3.88709	1.00394	0.31636
chr1	8426022	8428484	2463	chr1	9434974	9436569	1596	1008518	2.57893	3.88376	1.80247	0.179414
chr1	8455311	8459760	4450	chr1	8482716	8491398	8683	29521	0.165281	5.65694	0.0534152	0.817224
chr1	8455311	8459760	4450	chr1	8532404	8534809	2406	76071	0.51284	4.29165	0.147421	0.701013
chr1	8455311	8459760	4450	chr1	8553728	8557763	4036	98210	-0.128417	5.0865	0.0205289	0.88607
chr1	8455311	8459760	4450	chr1	8571752	8573613	1862	115147	-0.8745	4.29479	0.369729	0.543152
chr1	8455311	8459760	4450	chr1	8578185	8580291	2107	121702	3.50433	4.05674	3.62885	0.0567861
chr1	8455311	8459760	4450	chr1	8584306	8586445	2140	127840	-1.25881	4.41063	0.840087	0.359372
chr1	8455311	8459760	4450	chr1	8588985	8594769	5785	134341	-0.0757775	5.11069	0.00733255	0.93176
chr1	8455311	8459760	4450	chr1	8689051	8690482	1432	232231	-2.10967	3.88438	1.00111	0.317041
chr1	8455311	8459760	4450	chr1	8702050	8705760	3711	246369	0.469252	4.03353	0.0789089	0.778781
chr1	8455311	8459760	4450	chr1	8711106	8713374	2269	254704	-2.93507	4.03679	1.97986	0.159405
chr1	8455311	8459760	4450	chr1	8760141	8763768	3628	304419	-2.10967	3.88438	1.00111	0.317041
chr1	8455311	8459760	4450	chr1	8823467	8826204	2738	367300	2.64212	3.90778	1.85425	0.17329
chr1	8455311	8459760	4450	chr1	8876111	8879195	3085	420117	-2.11484	3.88709	1.00394	0.31636
chr1	8455311	8459760	4450	chr1	9067242	9072046	4805	612108	-0.356139	4.17145	0.0538612	0.816476
chr1	8455311	8459760	4450	chr1	9121437	9125548	4112	665957	0.469252	4.03353	0.0789089	0.778781
chr1	8455311	8459760	4450	chr1	9126987	9130377	3391	671146	-2.10967	3.88438	1.00111	0.317041
chr1	8455311	8459760	4450	chr1	9134858	9136911	2054	678349	3.44292	4.03292	3.53119	0.0602246
chr1	8455311	8459760	4450	chr1	9137906	9143657	5752	683246	0.469252	4.03353	0.0789089	0.778781
chr1	8455311	8459760	4450	chr1	9202869	9204309	1441	746053	-2.94007	4.03946	1.98523	0.15884
chr1	8455311	8459760	4450	chr1	9422394	9424429	2036	965876	-2.10967	3.88438	1.00111	0.317041
chr1	8455311	8459760	4450	chr1	9472046	9475771	3726	1016373	-2.11484	3.88709	1.00394	0.31636
chr1	8455311	8459760	4450	chr1	9907425	9912111	4687	1452232	-2.10967	3.88438	1.00111	0.317041
chr1	8482716	8491398	8683	chr1	8532404	8534809	2406	46549	-0.207552	5.28153	0.0624493	0.802666
chr1	8482716	8491398	8683	chr1	8553728	8557763	4036	68688	0.145045	6.69915	0.0704047	0.790749
chr1	8482716	8491398	8683	chr1	8571752	8573613	1862	85625	0.359191	5.10576	0.169338	0.680701
chr1	8482716	8491398	8683	chr1	8578185	8580291	2107	92181	-0.40935	5.77051	0.335205	0.56261
chr1	8482716	8491398	8683	chr1	8584306	8586445	2140	98318	-0.243741	4.94647	0.0654532	0.798076
chr1	8482716	8491398	8683	chr1	8588985	8594769	5785	104820	-0.0683629	6.58641	0.0140324	0.905704
chr1	8482716	8491398	8683	chr1	8689051	8690482	1432	202709	1.32808	4.17086	0.802402	0.370376
chr1	8482716	8491398	8683	chr1	8702050	8705760	3711	216848	-0.163974	4.70275	0.0233493	0.878552
chr1	8482716	8491398	8683	chr1	8711106	8713374	2269	225183	-0.698801	4.61468	0.364981	0.545753
chr1	8482716	8491398	8683	chr1	8760141	8763768	3628	274897	-4.38886	4.51842	5.66279	0.0173285
chr1	8482716	8491398	8683	chr1	8814917	8816746	1830	328774	2.57893	3.88376	1.80247	0.179414
chr1	8482716	8491398	8683	chr1	8823467	8826204	2738	337778	-0.8745	4.29479	0.369729	0.543152
chr1	8482716	8491398	8683	chr1	8839496	8841869	2374	353625	-1.24945	4.4056	0.828221	0.362787
chr1	8482716	8491398	8683	chr1	8876111	8879195	3085	390596	0.469252	4.03353	0.0789089	0.778781
chr1	8482716	8491398	8683	chr1	8937383	8940454	3072	451861	-0.597395	5.09139	0.43013	0.511925
chr1	8482716	8491398	8683	chr1	9045973	9048387	2415	560123	-2.11484	3.88709	1.00394	0.31636
chr1	8482716	8491398	8683	chr1	9058799	9060453	1655	572569	-2.10967	3.88438	1.00111	0.317041
chr1	8482716	8491398	8683	chr1	9067242	9072046	4805	582587	-1.24945	4.4056	0.828221	0.362787
chr1	8482716	8491398	8683	chr1	9096675	9099697	3023	611129	-2.10967	3.88438	1.00111	0.317041
chr1	8482716	8491398	8683	chr1	9121437	9125548	4112	636435	3.44292	4.03292	3.53119	0.0602246
chr1	8482716	8491398	8683	chr1	9126987	9130377	3391	641625	-3.45343	4.17205	2.92956	0.0869714
chr1	8482716	8491398	8683	chr1	9134858	9136911	2054	648827	1.3895	4.19452	0.866914	0.351811
chr1	8482716	8491398	8683	chr1	9137906	9143657	5752	653724	0.519764	4.51179	0.203568	0.651856
chr1	8482716	8491398	8683	chr1	9202869	9204309	1441	716532	-2.10967	3.88438	1.00111	0.317041
chr1	8482716	8491398	8683	chr1	9422394	9424429	2036	936354	-2.11484	3.88709	1.00394	0.31636
chr1	8482716	8491398	8683	chr1	9479498	9481290	1793	993337	-2.10967	3.88438	1.00111	0.317041
chr1	8482716	8491398	8683	chr1	9484561	9488337	3777	999392	-0.884191	4.29992	0.37729	0.539057
chr1	8482716	8491398	8683	chr1	9846197	9848701	2505	1360392	-2.10967	3.88438	1.00111	0.317041
chr1	8482716	8491398	8683	chr1	9907425	9912111	4687	1422711	0.507851	4.29421	0.144875	0.703482
chr1	8482716	8491398	8683	chr1	9922379	9926527	4149	1437396	-2.93507	4.03679	1.97986	0.159405
chr1	8482716	8491398	8683	chr1	10002037	10004636	2600	1516279	-2.10967	3.88438	1.00111	0.317041
chr1	8532404	8534809	2406	chr1	8553728	8557763	4036	22139	-0.799848	5.61126	1.07841	0.299054
chr1	8532404	8534809	2406	chr1	8571752	8573613	1862	39076	1.32808	4.17086	0.802402	0.370376
chr1	8532404	8534809	2406	chr1	8584306	8586445	2140	51769	-0.356139	4.17145	0.0538612	0.816476
chr1	8532404	8534809	2406	chr1	8588985	8594769	5785	58270	0.613907	5.31332	0.574613	0.448432
chr1	8532404	8534809	2406	chr1	8702050	8705760	3711	170298	-2.94007	4.03946	1.98523	0.15884
chr1	8532404	8534809	2406	chr1	8711106	8713374	2269	178633	2.57893	3.88376	1.80247	0.179414
chr1	8532404	8534809	2406	chr1	8760141	8763768	3628	228348	-2.10967	3.88438	1.00111	0.317041
chr1	8532404	8534809	2406	chr1	8876111	8879195	3085	344046	-2.11484	3.88709	1.00394	0.31636
chr1	8532404	8534809	2406	chr1	8937383	8940454	3072	405312	-2.10967	3.88438	1.00111	0.317041
chr1	8532404	8534809	2406	chr1	9067242	9072046	4805	536037	-0.361142	4.17406	0.0551936	0.814261
chr1	8532404	8534809	2406	chr1	9121437	9125548	4112	589886	2.57893	3.88376	1.80247	0.179414
chr1	8532404	8534809	2406	chr1	9126987	9130377	3391	595075	-2.10967	3.88438	1.00111	0.317041
chr1	8532404	8534809	2406	chr1	9134858	9136911	2054	602278	0.469252	4.03353	0.0789089	0.778781
chr1	8532404	8534809	2406	chr1	9137906	9143657	5752	607175	2.57893	3.88376	1.80247	0.179414
chr1	8532404	8534809	2406	chr1	9472046	9475771	3726	940302	-2.93008	4.03414	1.97452	0.159969
chr1	8532404	8534809	2406	chr1	10457928	10460418	2491	1925566	-2.10967	3.88438	1.00111	0.317041
chr1	8553728	8557763	4036	chr1	8571752	8573613	1862	16937	-0.399273	5.76503	0.318973	0.572226
chr1	8553728	8557763	4036	chr1	8578185	8580291	2107	23492	0.84291	5.62747	1.40585	0.235746
chr1	8553728	8557763	4036	chr1	8584306	8586445	2140	29630	0.952768	5.31285	1.38884	0.238601
chr1	8553728	8557763	4036	chr1	8588985	8594769	5785	36131	-0.727532	6.34465	1.3446	0.246224
chr1	8553728	8557763	4036	chr1	8689051	8690482	1432	134021	0.469252	4.03353	0.0789089	0.778781
chr1	8553728	8557763	4036	chr1	8702050	8705760	3711	148159	0.502848	4.29677	0.142344	0.705962
chr1	8553728	8557763	4036	chr1	8711106	8713374	2269	156494	0.507851	4.29421	0.144875	0.703482
chr1	8553728	8557763	4036	chr1	8760141	8763768	3628	206209	1.32808	4.17086	0.802402	0.370376
chr1	8553728	8557763	4036	chr1	8814917	8816746	1830	260086	-2.93507	4.03679	1.97986	0.159405
chr1	8553728	8557763	4036	chr1	8823467	8826204	2738	269090	0.469252	4.03353	0.0789089	0.778781
chr1	8553728	8557763	4036	chr1	8876111	8879195	3085	321907	-0.0153495	4.41006	0.000109797	0.99164
chr1	8553728	8557763	4036	chr1	8937383	8940454	3072	383173	-0.8745	4.29479	0.369729	0.543152
chr1	8553728	8557763	4036	chr1	9045973	9048387	2415	491434	-2.10967	3.88438	1.00111	0.317041
chr1	8553728	8557763	4036	chr1	9067242	9072046	4805	513898	0.469252	4.03353	0.0789089	0.778781
chr1	8553728	8557763	4036	chr1	9096675	9099697	3023	542440	-2.11484	3.88709	1.00394	0.31636
chr1	8553728	8557763	4036	chr1	9121437	9125548	4112	567747	2.64212	3.90778	1.85425	0.17329
chr1	8553728	8557763	4036	chr1	9126987	9130377	3391	572936	-2.93008	4.03414	1.97452	0.159969
chr1	8553728	8557763	4036	chr1	9134858	9136911	2054	580139	-0.35115	4.16885	0.0525494	0.818685
chr1	8553728	8557763	4036	chr1	9137906	9143657	5752	585036	-0.163974	4.70275	0.0233493	0.878552
chr1	8553728	8557763	4036	chr1	9188731	9190607	1877	633923	2.57893	3.88376	1.80247	0.179414
chr1	8553728	8557763	4036	chr1	9472046	9475771	3726	918163	2.57893	3.88376	1.80247	0.179414
chr1	8553728	8557763	4036	chr1	9484561	9488337	3777	930703	-2.11484	3.88709	1.00394	0.31636
chr1	8553728	8557763	4036	chr1	9647906	9651638	3733	1094026	2.57893	3.88376	1.80247	0.179414
chr1	8553728	8557763	4036	chr1	9687977	9691246	3270	1133866	-2.11484	3.88709	1.00394	0.31636
chr1	8553728	8557763	4036	chr1	9881709	9884826	3118	1327522	-2.10967	3.88438	1.00111	0.317041
chr1	8553728	8557763	4036	chr1	9922379	9926527	4149	1368707	2.57893	3.88376	1.80247	0.179414
chr1	8553728	8557763	4036	chr1	9932609	9934375	1767	1377746	-2.10967	3.88438	1.00111	0.317041
chr1	8553728	8557763	4036	chr1	9940361	9942428	2068	1385649	2.57893	3.88376	1.80247	0.179414
chr1	8553728	8557763	4036	chr1	10019516	10021792	2277	1464908	-2.10967	3.88438	1.00111	0.317041
chr1	8553728	8557763	4036	chr1	10531332	10536785	5454	1978313	2.57893	3.88376	1.80247	0.179414
chr1	8571752	8573613	1862	chr1	8578185	8580291	2107	6555	-0.0501672	5.21567	0.00334693	0.953866
chr1	8571752	8573613	1862	chr1	8584306	8586445	2140	12693	-1.56279	4.51786	1.39285	0.237925
chr1	8571752	8573613	1862	chr1	8588985	8594769	5785	19194	0.188776	5.74313	0.0736299	0.786123
chr1	8571752	8573613	1862	chr1	8689051	8690482	1432	117084	2.57893	3.88376	1.80247	0.179414
chr1	8571752	8573613	1862	chr1	8702050	8705760	3711	131222	-2.93008	4.03414	1.97452	0.159969
chr1	8571752	8573613	1862	chr1	8711106	8713374	2269	139557	-1.20031	4.4365	0.766923	0.381171
chr1	8571752	8573613	1862	chr1	8839496	8841869	2374	268000	-2.11484	3.88709	1.00394	0.31636
chr1	8571752	8573613	1862	chr1	8876111	8879195	3085	304970	2.57893	3.88376	1.80247	0.179414
chr1	8571752	8573613	1862	chr1	8937383	8940454	3072	366236	0.469252	4.03353	0.0789089	0.778781
chr1	8571752	8573613	1862	chr1	9067242	9072046	4805	496961	1.32808	4.17086	0.802402	0.370376
chr1	8571752	8573613	1862	chr1	9134858	9136911	2054	563202	2.57893	3.88376	1.80247	0.179414
chr1	8571752	8573613	1862	chr1	9137906	9143657	5752	568099	-0.356139	4.17145	0.0538612	0.816476
chr1	8571752	8573613	1862	chr1	9188731	9190607	1877	616986	2.57893	3.88376	1.80247	0.179414
chr1	8571752	8573613	1862	chr1	9647906	9651638	3733	1077089	2.57893	3.88376	1.80247	0.179414
chr1	8578185	8580291	2107	chr1	8584306	8586445	2140	6137	0.0575571	5.3574	0.00526943	0.942132
chr1	8578185	8580291	2107	chr1	8588985	8594769	5785	12639	-0.061855	6.42641	0.0107035	0.9176
chr1	8578185	8580291	2107	chr1	8689051	8690482	1432	110528	-2.11484	3.88709	1.00394	0.31636
chr1	8578185	8580291	2107	chr1	8702050	8705760	3711	124667	-2.93507	4.03679	1.97986	0.159405
chr1	8578185	8580291	2107	chr1	8711106	8713374	2269	133002	1.33324	4.16825	0.807817	0.368766
chr1	8578185	8580291	2107	chr1	8760141	8763768	3628	182716	-2.93507	4.03679	1.97986	0.159405
chr1	8578185	8580291	2107	chr1	8814917	8816746	1830	236593	2.57893	3.88376	1.80247	0.179414
chr1	8578185	8580291	2107	chr1	8823467	8826204	2738	245597	-3.45343	4.17205	2.92956	0.0869714
chr1	8578185	8580291	2107	chr1	8839496	8841869	2374	261444	-2.11484	3.88709	1.00394	0.31636
chr1	8578185	8580291	2107	chr1	8876111	8879195	3085	298415	-2.11484	3.88709	1.00394	0.31636
chr1	8578185	8580291	2107	chr1	8937383	8940454	3072	359680	-0.356139	4.17145	0.0538612	0.816476
chr1	8578185	8580291	2107	chr1	9067242	9072046	4805	490406	-3.45343	4.17205	2.92956	0.0869714
chr1	8578185	8580291	2107	chr1	9126987	9130377	3391	549444	-2.10967	3.88438	1.00111	0.317041
chr1	8578185	8580291	2107	chr1	9134858	9136911	2054	556646	-2.10967	3.88438	1.00111	0.317041
chr1	8578185	8580291	2107	chr1	9137906	9143657	5752	561543	0.502848	4.29677	0.142344	0.705962
chr1	8578185	8580291	2107	chr1	9294155	9296678	2524	716178	2.57893	3.88376	1.80247	0.179414
chr1	8578185	8580291	2107	chr1	9464736	9467982	3247	887121	-2.10967	3.88438	1.00111	0.317041
chr1	8578185	8580291	2107	chr1	9472046	9475771	3726	894670	2.57893	3.88376	1.80247	0.179414
chr1	8578185	8580291	2107	chr1	9711253	9715818	4566	1134297	2.57893	3.88376	1.80247	0.179414
chr1	8578185	8580291	2107	chr1	9746649	9748796	2148	1168484	-2.11484	3.88709	1.00394	0.31636
chr1	8584306	8586445	2140	chr1	8588985	8594769	5785	6501	0.207871	6.15635	0.114977	0.734547
chr1	8584306	8586445	2140	chr1	8702050	8705760	3711	118529	-2.10967	3.88438	1.00111	0.317041
chr1	8584306	8586445	2140	chr1	8711106	8713374	2269	126864	1.32808	4.17086	0.802402	0.370376
chr1	8584306	8586445	2140	chr1	8760141	8763768	3628	176579	-2.93507	4.03679	1.97986	0.159405
chr1	8584306	8586445	2140	chr1	8814917	8816746	1830	230456	-2.11484	3.88709	1.00394	0.31636
chr1	8584306	8586445	2140	chr1	8876111	8879195	3085	292277	2.57893	3.88376	1.80247	0.179414
chr1	8584306	8586445	2140	chr1	8937383	8940454	3072	353543	-2.11484	3.88709	1.00394	0.31636
chr1	8584306	8586445	2140	chr1	9067242	9072046	4805	484268	3.50433	4.05674	3.62885	0.0567861
chr1	8584306	8586445	2140	chr1	9096675	9099697	3023	512810	-2.10967	3.88438	1.00111	0.317041
chr1	8584306	8586445	2140	chr1	9126987	9130377	3391	543306	-2.11484	3.88709	1.00394	0.31636
chr1	8584306	8586445	2140	chr1	9134858	9136911	2054	550509	-2.93008	4.03414	1.97452	0.159969
chr1	8584306	8586445	2140	chr1	9137906	9143657	5752	555406	1.03813	4.40697	0.707525	0.400267
chr1	8584306	8586445	2140	chr1	9294155	9296678	2524	710041	-2.11484	3.88709	1.00394	0.31636
chr1	8584306	8586445	2140	chr1	9740271	9742218	1948	1155869	2.64212	3.90778	1.85425	0.17329
chr1	8584306	8586445	2140	chr1	9775804	9779669	3866	1192361	0.469252	4.03353	0.0789089	0.778781
chr1	8584306	8586445	2140	chr1	10002037	10004636	2600	1417961	-2.10967	3.88438	1.00111	0.317041
chr1	8588985	8594769	5785	chr1	8702050	8705760	3711	112028	-0.0105104	4.40754	4.81688e-05	0.994462
chr1	8588985	8594769	5785	chr1	8711106	8713374	2269	120363	0.906981	4.6063	0.693795	0.404876
chr1	8588985	8594769	5785	chr1	8760141	8763768	3628	170077	-0.35115	4.16885	0.0525494	0.818685
chr1	8588985	8594769	5785	chr1	8814917	8816746	1830	223954	0.507851	4.29421	0.144875	0.703482
chr1	8588985	8594769	5785	chr1	8823467	8826204	2738	232958	-0.00568427	4.40503	1.16462e-05	0.997277
chr1	8588985	8594769	5785	chr1	8839496	8841869	2374	248805	3.44292	4.03292	3.53119	0.0602246
chr1	8588985	8594769	5785	chr1	8876111	8879195	3085	285776	-0.0153495	4.41006	0.000109797	0.99164
chr1	8588985	8594769	5785	chr1	8937383	8940454	3072	347041	-0.0288613	4.86814	0.000780528	0.977712
chr1	8588985	8594769	5785	chr1	9067242	9072046	4805	477767	-0.35115	4.16885	0.0525494	0.818685
chr1	8588985	8594769	5785	chr1	9096675	9099697	3023	506309	-2.10967	3.88438	1.00111	0.317041
chr1	8588985	8594769	5785	chr1	9121437	9125548	4112	531615	0.469252	4.03353	0.0789089	0.778781
chr1	8588985	8594769	5785	chr1	9126987	9130377	3391	536805	-2.93507	4.03679	1.97986	0.159405
chr1	8588985	8594769	5785	chr1	9134858	9136911	2054	544007	-0.00568427	4.40503	1.16462e-05	0.997277
chr1	8588985	8594769	5785	chr1	9137906	9143657	5752	548904	-1.16932	4.79812	1.14448	0.284708
chr1	8588985	8594769	5785	chr1	9422394	9424429	2036	831534	-2.10967	3.88438	1.00111	0.317041
chr1	8588985	8594769	5785	chr1	9464736	9467982	3247	874482	-2.10967	3.88438	1.00111	0.317041
chr1	8588985	8594769	5785	chr1	9479498	9481290	1793	888517	-2.11484	3.88709	1.00394	0.31636
chr1	8588985	8594769	5785	chr1	9484561	9488337	3777	894572	-2.93507	4.03679	1.97986	0.159405
chr1	8588985	8594769	5785	chr1	9628452	9630984	2533	1037841	2.57893	3.88376	1.80247	0.179414
chr1	8588985	8594769	5785	chr1	9846197	9848701	2505	1255572	-2.10967	3.88438	1.00111	0.317041
chr1	8588985	8594769	5785	chr1	9907425	9912111	4687	1317891	-0.292941	4.19512	0.0385064	0.84443
chr1	8588985	8594769	5785	chr1	9969343	9971870	2528	1378729	-2.11484	3.88709	1.00394	0.31636
chr1	8588985	8594769	5785	chr1	10092546	10095119	2574	1501955	-2.10967	3.88438	1.00111	0.317041
chr1	8588985	8594769	5785	chr1	10531332	10536785	5454	1942181	0.464089	4.03619	0.0775205	0.780686
chr1	8689051	8690482	1432	chr1	8702050	8705760	3711	14138	-2.11484	3.88709	1.00394	0.31636
chr1	8689051	8690482	1432	chr1	8711106	8713374	2269	22473	1.32808	4.17086	0.802402	0.370376
chr1	8689051	8690482	1432	chr1	8839496	8841869	2374	150916	2.64212	3.90778	1.85425	0.17329
chr1	8689051	8690482	1432	chr1	9137906	9143657	5752	451015	0.469252	4.03353	0.0789089	0.778781
chr1	8702050	8705760	3711	chr1	8711106	8713374	2269	8335	-0.991374	5.27617	1.29823	0.254537
chr1	8702050	8705760	3711	chr1	8760141	8763768	3628	58049	-0.361142	4.17406	0.0551936	0.814261
chr1	8702050	8705760	3711	chr1	8823467	8826204	2738	120930	0.469252	4.03353	0.0789089	0.778781
chr1	8702050	8705760	3711	chr1	8839496	8841869	2374	136777	1.33324	4.16825	0.807817	0.368766
chr1	8702050	8705760	3711	chr1	8876111	8879195	3085	173748	0.469252	4.03353	0.0789089	0.778781
chr1	8702050	8705760	3711	chr1	8937383	8940454	3072	235013	-3.4486	4.16944	2.92196	0.0873815
chr1	8702050	8705760	3711	chr1	9058799	9060453	1655	355721	2.57893	3.88376	1.80247	0.179414
chr1	8702050	8705760	3711	chr1	9096675	9099697	3023	394281	2.57893	3.88376	1.80247	0.179414
chr1	8702050	8705760	3711	chr1	9121437	9125548	4112	419587	-2.11484	3.88709	1.00394	0.31636
chr1	8702050	8705760	3711	chr1	9137906	9143657	5752	436876	3.44292	4.03292	3.53119	0.0602246
chr1	8702050	8705760	3711	chr1	9479498	9481290	1793	776489	2.57893	3.88376	1.80247	0.179414
chr1	8702050	8705760	3711	chr1	9484561	9488337	3777	782544	2.57893	3.88376	1.80247	0.179414
chr1	8702050	8705760	3711	chr1	9628452	9630984	2533	925813	2.57893	3.88376	1.80247	0.179414
chr1	8702050	8705760	3711	chr1	9647906	9651638	3733	945867	-2.11484	3.88709	1.00394	0.31636
chr1	8702050	8705760	3711	chr1	10457928	10460418	2491	1755268	-2.11484	3.88709	1.00394	0.31636
chr1	8711106	8713374	2269	chr1	8760141	8763768	3628	49714	0.51284	4.29165	0.147421	0.701013
chr1	8711106	8713374	2269	chr1	8814917	8816746	1830	103591	-2.10967	3.88438	1.00111	0.317041
chr1	8711106	8713374	2269	chr1	8823467	8826204	2738	112595	-2.11484	3.88709	1.00394	0.31636
chr1	8711106	8713374	2269	chr1	8876111	8879195	3085	165413	0.469252	4.03353	0.0789089	0.778781
chr1	8711106	8713374	2269	chr1	9067242	9072046	4805	357404	1.32808	4.17086	0.802402	0.370376
chr1	8711106	8713374	2269	chr1	9134858	9136911	2054	423644	3.44292	4.03292	3.53119	0.0602246
chr1	8711106	8713374	2269	chr1	9137906	9143657	5752	428541	0.464089	4.03619	0.0775205	0.780686
chr1	8711106	8713374	2269	chr1	9484561	9488337	3777	774209	0.464089	4.03619	0.0775205	0.780686
chr1	8711106	8713374	2269	chr1	9597661	9600208	2548	886694	-2.10967	3.88438	1.00111	0.317041
chr1	8711106	8713374	2269	chr1	9746649	9748796	2148	1035482	-2.10967	3.88438	1.00111	0.317041
chr1	8711106	8713374	2269	chr1	10531332	10536785	5454	1821818	-2.10967	3.88438	1.00111	0.317041
chr1	8760141	8763768	3628	chr1	8823467	8826204	2738	62881	-2.11484	3.88709	1.00394	0.31636
chr1	8760141	8763768	3628	chr1	8839496	8841869	2374	78728	-2.11484	3.88709	1.00394	0.31636
chr1	8760141	8763768	3628	chr1	8876111	8879195	3085	115698	-2.10967	3.88438	1.00111	0.317041
chr1	8760141	8763768	3628	chr1	8937383	8940454	3072	176964	-0.869674	4.29223	0.365995	0.545196
chr1	8760141	8763768	3628	chr1	9096675	9099697	3023	336231	-2.94007	4.03946	1.98523	0.15884
chr1	8760141	8763768	3628	chr1	9126987	9130377	3391	366727	-2.10967	3.88438	1.00111	0.317041
chr1	8760141	8763768	3628	chr1	9137906	9143657	5752	378827	-2.93507	4.03679	1.97986	0.159405
chr1	8760141	8763768	3628	chr1	9472046	9475771	3726	711954	-2.11484	3.88709	1.00394	0.31636
chr1	8760141	8763768	3628	chr1	9484561	9488337	3777	724494	-2.11484	3.88709	1.00394	0.31636
chr1	8760141	8763768	3628	chr1	10457928	10460418	2491	1697218	-2.10967	3.88438	1.00111	0.317041
chr1	8814917	8816746	1830	chr1	8823467	8826204	2738	9004	0.507851	4.29421	0.144875	0.703482
chr1	8814917	8816746	1830	chr1	8839496	8841869	2374	24851	-3.83774	4.29794	3.86427	0.0493245
chr1	8814917	8816746	1830	chr1	8876111	8879195	3085	61821	3.44292	4.03292	3.53119	0.0602246
chr1	8814917	8816746	1830	chr1	8937383	8940454	3072	123087	-2.10967	3.88438	1.00111	0.317041
chr1	8814917	8816746	1830	chr1	9121437	9125548	4112	307661	2.57893	3.88376	1.80247	0.179414
chr1	8814917	8816746	1830	chr1	9126987	9130377	3391	312850	2.64212	3.90778	1.85425	0.17329
chr1	8814917	8816746	1830	chr1	9137906	9143657	5752	324950	1.91812	4.31709	1.93208	0.164531
chr1	8814917	8816746	1830	chr1	9464736	9467982	3247	650527	-2.10967	3.88438	1.00111	0.317041
chr1	8814917	8816746	1830	chr1	9479498	9481290	1793	664562	-2.11484	3.88709	1.00394	0.31636
chr1	8814917	8816746	1830	chr1	10457928	10460418	2491	1643341	2.64212	3.90778	1.85425	0.17329
chr1	8823467	8826204	2738	chr1	8839496	8841869	2374	15847	-0.00568427	4.40503	1.16462e-05	0.997277
chr1	8823467	8826204	2738	chr1	8876111	8879195	3085	52817	-3.45827	4.17466	2.93719	0.0865614
chr1	8823467	8826204	2738	chr1	8937383	8940454	3072	114083	-3.45343	4.17205	2.92956	0.0869714
chr1	8823467	8826204	2738	chr1	9045973	9048387	2415	222344	-2.11484	3.88709	1.00394	0.31636
chr1	8823467	8826204	2738	chr1	9067242	9072046	4805	244808	0.469252	4.03353	0.0789089	0.778781
chr1	8823467	8826204	2738	chr1	9096675	9099697	3023	273350	-2.11484	3.88709	1.00394	0.31636
chr1	8823467	8826204	2738	chr1	9121437	9125548	4112	298657	-2.10967	3.88438	1.00111	0.317041
chr1	8823467	8826204	2738	chr1	9126987	9130377	3391	303846	2.57893	3.88376	1.80247	0.179414
chr1	8823467	8826204	2738	chr1	9134858	9136911	2054	311049	-2.93008	4.03414	1.97452	0.159969
chr1	8823467	8826204	2738	chr1	9137906	9143657	5752	315946	2.57893	3.88376	1.80247	0.179414
chr1	8839496	8841869	2374	chr1	8876111	8879195	3085	36970	1.47876	4.53433	1.59667	0.206376
chr1	8839496	8841869	2374	chr1	8937383	8940454	3072	98236	0.507851	4.29421	0.144875	0.703482
chr1	8839496	8841869	2374	chr1	9067242	9072046	4805	228961	0.464089	4.03619	0.0775205	0.780686
chr1	8839496	8841869	2374	chr1	9137906	9143657	5752	300099	-2.10967	3.88438	1.00111	0.317041
chr1	8839496	8841869	2374	chr1	9234454	9236482	2029	394785	-2.93507	4.03679	1.97986	0.159405
chr1	8839496	8841869	2374	chr1	9647906	9651638	3733	809089	2.57893	3.88376	1.80247	0.179414
chr1	8839496	8841869	2374	chr1	9907425	9912111	4687	1069085	-2.93008	4.03414	1.97452	0.159969
chr1	8876111	8879195	3085	chr1	8937383	8940454	3072	61265	1.85835	4.29362	1.82579	0.176626
chr1	8876111	8879195	3085	chr1	9045973	9048387	2415	169527	3.44292	4.03292	3.53119	0.0602246
chr1	8876111	8879195	3085	chr1	9067242	9072046	4805	191991	-1.26821	4.41567	0.852105	0.355957
chr1	8876111	8879195	3085	chr1	9096675	9099697	3023	220533	-2.10967	3.88438	1.00111	0.317041
chr1	8876111	8879195	3085	chr1	9121437	9125548	4112	245839	-2.10967	3.88438	1.00111	0.317041
chr1	8876111	8879195	3085	chr1	9126987	9130377	3391	251029	-2.10967	3.88438	1.00111	0.317041
chr1	8876111	8879195	3085	chr1	9134858	9136911	2054	258231	0.469252	4.03353	0.0789089	0.778781
chr1	8876111	8879195	3085	chr1	9137906	9143657	5752	263128	-1.55824	4.51538	1.38488	0.239272
chr1	8876111	8879195	3085	chr1	9294155	9296678	2524	417763	-2.10967	3.88438	1.00111	0.317041
chr1	8876111	8879195	3085	chr1	9472046	9475771	3726	596255	-2.11484	3.88709	1.00394	0.31636
chr1	8876111	8879195	3085	chr1	9484561	9488337	3777	608796	-2.11484	3.88709	1.00394	0.31636
chr1	8876111	8879195	3085	chr1	9687977	9691246	3270	811958	-2.93507	4.03679	1.97986	0.159405
chr1	8876111	8879195	3085	chr1	9711253	9715818	4566	835882	2.57893	3.88376	1.80247	0.179414
chr1	8876111	8879195	3085	chr1	9881709	9884826	3118	1005614	-2.10967	3.88438	1.00111	0.317041
chr1	8876111	8879195	3085	chr1	10009103	10012132	3030	1132964	0.464089	4.03619	0.0775205	0.780686
chr1	8937383	8940454	3072	chr1	9045973	9048387	2415	108261	-0.689706	4.60982	0.355925	0.550778
chr1	8937383	8940454	3072	chr1	9058799	9060453	1655	120707	2.57893	3.88376	1.80247	0.179414
chr1	8937383	8940454	3072	chr1	9067242	9072046	4805	130725	0.988502	5.32632	1.5703	0.210164
chr1	8937383	8940454	3072	chr1	9096675	9099697	3023	159267	0.464089	4.03619	0.0775205	0.780686
chr1	8937383	8940454	3072	chr1	9121437	9125548	4112	184574	-3.83305	4.29537	3.85462	0.0496092
chr1	8937383	8940454	3072	chr1	9126987	9130377	3391	189763	0.111653	5.04015	0.0151469	0.902049
chr1	8937383	8940454	3072	chr1	9134858	9136911	2054	196966	0.190529	4.63711	0.0293627	0.863944
chr1	8937383	8940454	3072	chr1	9137906	9143657	5752	201863	-0.0461024	5.21354	0.00282082	0.957643
chr1	8937383	8940454	3072	chr1	9158320	9159723	1404	220103	-3.45343	4.17205	2.92956	0.0869714
chr1	8937383	8940454	3072	chr1	9188731	9190607	1877	250750	-3.45343	4.17205	2.92956	0.0869714
chr1	8937383	8940454	3072	chr1	9294155	9296678	2524	356498	-3.46312	4.17727	2.94485	0.0861515
chr1	8937383	8940454	3072	chr1	9422394	9424429	2036	484493	2.64212	3.90778	1.85425	0.17329
chr1	8937383	8940454	3072	chr1	9464736	9467982	3247	527440	-2.11484	3.88709	1.00394	0.31636
chr1	8937383	8940454	3072	chr1	9472046	9475771	3726	534990	-2.93507	4.03679	1.97986	0.159405
chr1	8937383	8940454	3072	chr1	9479498	9481290	1793	541475	0.527287	4.06005	0.0951824	0.757689
chr1	8937383	8940454	3072	chr1	9484561	9488337	3777	547530	-2.93507	4.03679	1.97986	0.159405
chr1	8937383	8940454	3072	chr1	9647906	9651638	3733	710853	-2.10967	3.88438	1.00111	0.317041
chr1	8937383	8940454	3072	chr1	9687977	9691246	3270	750693	2.57893	3.88376	1.80247	0.179414
chr1	8937383	8940454	3072	chr1	9711253	9715818	4566	774617	0.464089	4.03619	0.0775205	0.780686
chr1	8937383	8940454	3072	chr1	9740271	9742218	1948	802326	2.57893	3.88376	1.80247	0.179414
chr1	8937383	8940454	3072	chr1	9775804	9779669	3866	838818	-2.11484	3.88709	1.00394	0.31636
chr1	8937383	8940454	3072	chr1	9907425	9912111	4687	970849	-2.11484	3.88709	1.00394	0.31636
chr1	8937383	8940454	3072	chr1	10002037	10004636	2600	1064418	-2.10967	3.88438	1.00111	0.317041
chr1	8937383	8940454	3072	chr1	10457928	10460418	2491	1520254	-2.10967	3.88438	1.00111	0.317041
chr1	8937383	8940454	3072	chr1	10531332	10536785	5454	1595140	-2.10967	3.88438	1.00111	0.317041
chr1	9045973	9048387	2415	chr1	9058799	9060453	1655	12446	2.57893	3.88376	1.80247	0.179414
chr1	9045973	9048387	2415	chr1	9067242	9072046	4805	22464	0.471536	5.75976	0.477626	0.489499
chr1	9045973	9048387	2415	chr1	9096675	9099697	3023	51006	3.44292	4.03292	3.53119	0.0602246
chr1	9045973	9048387	2415	chr1	9121437	9125548	4112	76312	-0.356139	4.17145	0.0538612	0.816476
chr1	9045973	9048387	2415	chr1	9126987	9130377	3391	81502	-2.10967	3.88438	1.00111	0.317041
chr1	9045973	9048387	2415	chr1	9134858	9136911	2054	88704	1.33324	4.16825	0.807817	0.368766
chr1	9045973	9048387	2415	chr1	9137906	9143657	5752	93601	-2.02469	4.70861	2.61321	0.105977
chr1	9045973	9048387	2415	chr1	9234454	9236482	2029	188288	-2.93008	4.03414	1.97452	0.159969
chr1	9045973	9048387	2415	chr1	9434974	9436569	1596	388591	-2.10967	3.88438	1.00111	0.317041
chr1	9045973	9048387	2415	chr1	9484561	9488337	3777	439269	-2.94007	4.03946	1.98523	0.15884
chr1	9045973	9048387	2415	chr1	9746649	9748796	2148	700542	-2.10967	3.88438	1.00111	0.317041
chr1	9045973	9048387	2415	chr1	9775804	9779669	3866	730556	-2.11484	3.88709	1.00394	0.31636
chr1	9045973	9048387	2415	chr1	9907425	9912111	4687	862588	-2.10967	3.88438	1.00111	0.317041
chr1	9045973	9048387	2415	chr1	10457928	10460418	2491	1411993	-2.10967	3.88438	1.00111	0.317041
chr1	9058799	9060453	1655	chr1	9067242	9072046	4805	10018	-0.694248	4.61225	0.360433	0.548266
chr1	9058799	9060453	1655	chr1	9096675	9099697	3023	38560	2.57893	3.88376	1.80247	0.179414
chr1	9058799	9060453	1655	chr1	9121437	9125548	4112	63866	0.469252	4.03353	0.0789089	0.778781
chr1	9058799	9060453	1655	chr1	9134858	9136911	2054	76258	2.57893	3.88376	1.80247	0.179414
chr1	9058799	9060453	1655	chr1	9137906	9143657	5752	81155	-1.55824	4.51538	1.38488	0.239272
chr1	9058799	9060453	1655	chr1	9158320	9159723	1404	99395	2.57893	3.88376	1.80247	0.179414
chr1	9058799	9060453	1655	chr1	9294155	9296678	2524	235790	-2.10967	3.88438	1.00111	0.317041
chr1	9058799	9060453	1655	chr1	9472046	9475771	3726	414282	2.57893	3.88376	1.80247	0.179414
chr1	9058799	9060453	1655	chr1	9733380	9734698	1319	674413	-2.10967	3.88438	1.00111	0.317041
chr1	9058799	9060453	1655	chr1	10531332	10536785	5454	1474432	-2.11484	3.88709	1.00394	0.31636
chr1	9067242	9072046	4805	chr1	9096675	9099697	3023	28542	0.472931	5.59032	0.431522	0.511243
chr1	9067242	9072046	4805	chr1	9121437	9125548	4112	53848	0.275759	6.0711	0.185851	0.666393
chr1	9067242	9072046	4805	chr1	9126987	9130377	3391	59038	-0.264185	6.25495	0.179458	0.67184
chr1	9067242	9072046	4805	chr1	9134858	9136911	2054	66240	0.105605	6.17569	0.029467	0.863705
chr1	9067242	9072046	4805	chr1	9137906	9143657	5752	71137	-0.469215	7.79684	0.988257	0.320169
chr1	9067242	9072046	4805	chr1	9158320	9159723	1404	89377	-2.20365	4.7916	3.23467	0.0720948
chr1	9067242	9072046	4805	chr1	9188731	9190607	1877	120025	-0.356139	4.17145	0.0538612	0.816476
chr1	9067242	9072046	4805	chr1	9202869	9204309	1441	133945	-1.5537	4.51291	1.37696	0.24062
chr1	9067242	9072046	4805	chr1	9234454	9236482	2029	165824	-2.94007	4.03946	1.98523	0.15884
chr1	9067242	9072046	4805	chr1	9294155	9296678	2524	225772	-1.56279	4.51786	1.39285	0.237925
chr1	9067242	9072046	4805	chr1	9401998	9403822	1825	333266	2.57893	3.88376	1.80247	0.179414
chr1	9067242	9072046	4805	chr1	9422394	9424429	2036	353767	-2.10967	3.88438	1.00111	0.317041
chr1	9067242	9072046	4805	chr1	9434974	9436569	1596	366127	-2.10967	3.88438	1.00111	0.317041
chr1	9067242	9072046	4805	chr1	9464736	9467982	3247	396715	-0.0105104	4.40754	4.81688e-05	0.994462
chr1	9067242	9072046	4805	chr1	9472046	9475771	3726	404264	-1.16501	4.79577	1.13614	0.28647
chr1	9067242	9072046	4805	chr1	9479498	9481290	1793	410750	0.469252	4.03353	0.0789089	0.778781
chr1	9067242	9072046	4805	chr1	9484561	9488337	3777	416805	0.195226	4.63465	0.030749	0.860802
chr1	9067242	9072046	4805	chr1	9687977	9691246	3270	619967	-2.11484	3.88709	1.00394	0.31636
chr1	9067242	9072046	4805	chr1	9711253	9715818	4566	643891	-0.35115	4.16885	0.0525494	0.818685
chr1	9067242	9072046	4805	chr1	9740271	9742218	1948	671600	2.57893	3.88376	1.80247	0.179414
chr1	9067242	9072046	4805	chr1	9746649	9748796	2148	678078	2.57893	3.88376	1.80247	0.179414
chr1	9067242	9072046	4805	chr1	9775804	9779669	3866	708092	-2.93008	4.03414	1.97452	0.159969
chr1	9067242	9072046	4805	chr1	9846197	9848701	2505	777805	3.44292	4.03292	3.53119	0.0602246
chr1	9067242	9072046	4805	chr1	9907425	9912111	4687	840124	-0.394819	4.51482	0.107759	0.74271
chr1	9067242	9072046	4805	chr1	9922379	9926527	4149	854809	2.57893	3.88376	1.80247	0.179414
chr1	9067242	9072046	4805	chr1	9940361	9942428	2068	871750	2.57893	3.88376	1.80247	0.179414
chr1	9067242	9072046	4805	chr1	9969343	9971870	2528	900962	-2.10967	3.88438	1.00111	0.317041
chr1	9067242	9072046	4805	chr1	10457928	10460418	2491	1389529	-3.46312	4.17727	2.94485	0.0861515
chr1	9096675	9099697	3023	chr1	9121437	9125548	4112	25306	0.939873	5.31924	1.3523	0.244877
chr1	9096675	9099697	3023	chr1	9126987	9130377	3391	30496	0.295117	5.0882	0.116318	0.733063
chr1	9096675	9099697	3023	chr1	9134858	9136911	2054	37698	-0.698801	4.61468	0.364981	0.545753
chr1	9096675	9099697	3023	chr1	9137906	9143657	5752	42595	-0.0428187	6.05902	0.00421734	0.948221
chr1	9096675	9099697	3023	chr1	9158320	9159723	1404	60835	3.50433	4.05674	3.62885	0.0567861
chr1	9096675	9099697	3023	chr1	9234454	9236482	2029	137282	2.57893	3.88376	1.80247	0.179414
chr1	9096675	9099697	3023	chr1	9294155	9296678	2524	197230	2.64212	3.90778	1.85425	0.17329
chr1	9096675	9099697	3023	chr1	9464736	9467982	3247	368173	-0.35115	4.16885	0.0525494	0.818685
chr1	9096675	9099697	3023	chr1	9472046	9475771	3726	375722	2.57893	3.88376	1.80247	0.179414
chr1	9096675	9099697	3023	chr1	9775804	9779669	3866	679550	3.44292	4.03292	3.53119	0.0602246
chr1	9096675	9099697	3023	chr1	9907425	9912111	4687	811582	-2.10967	3.88438	1.00111	0.317041
chr1	9121437	9125548	4112	chr1	9126987	9130377	3391	5189	-1.22854	6.81375	4.56659	0.0326014
chr1	9121437	9125548	4112	chr1	9134858	9136911	2054	12392	-0.614125	6.31963	0.980887	0.32198
chr1	9121437	9125548	4112	chr1	9137906	9143657	5752	17289	-0.290274	7.56845	0.36001	0.548501
chr1	9121437	9125548	4112	chr1	9158320	9159723	1404	35529	0.199912	4.6322	0.0321635	0.857669
chr1	9121437	9125548	4112	chr1	9188731	9190607	1877	66176	-2.94007	4.03946	1.98523	0.15884
chr1	9121437	9125548	4112	chr1	9294155	9296678	2524	171924	-2.11484	3.88709	1.00394	0.31636
chr1	9121437	9125548	4112	chr1	9434974	9436569	1596	312279	2.57893	3.88376	1.80247	0.179414
chr1	9121437	9125548	4112	chr1	9464736	9467982	3247	342866	0.464089	4.03619	0.0775205	0.780686
chr1	9121437	9125548	4112	chr1	9472046	9475771	3726	350416	-2.10967	3.88438	1.00111	0.317041
chr1	9121437	9125548	4112	chr1	9484561	9488337	3777	362956	0.469252	4.03353	0.0789089	0.778781
chr1	9121437	9125548	4112	chr1	9711253	9715818	4566	590043	0.574257	4.31509	0.180164	0.671232
chr1	9121437	9125548	4112	chr1	9846197	9848701	2505	723956	-2.10967	3.88438	1.00111	0.317041
chr1	9121437	9125548	4112	chr1	9907425	9912111	4687	786275	-2.93507	4.03679	1.97986	0.159405
chr1	9121437	9125548	4112	chr1	9922379	9926527	4149	800960	-2.94007	4.03946	1.98523	0.15884
chr1	9121437	9125548	4112	chr1	10457928	10460418	2491	1335680	2.57893	3.88376	1.80247	0.179414
chr1	9121437	9125548	4112	chr1	10752673	10753939	1267	1629813	2.57893	3.88376	1.80247	0.179414
chr1	9126987	9130377	3391	chr1	9134858	9136911	2054	7202	-0.295041	7.04688	0.314265	0.575075
chr1	9126987	9130377	3391	chr1	9137906	9143657	5752	12099	-0.440913	7.938	0.906051	0.341164
chr1	9126987	9130377	3391	chr1	9158320	9159723	1404	30339	-1.56735	4.52033	1.40086	0.23658
chr1	9126987	9130377	3391	chr1	9202869	9204309	1441	74907	2.57893	3.88376	1.80247	0.179414
chr1	9126987	9130377	3391	chr1	9234454	9236482	2029	106786	0.527287	4.06005	0.0951824	0.757689
chr1	9126987	9130377	3391	chr1	9294155	9296678	2524	166734	2.64212	3.90778	1.85425	0.17329
chr1	9126987	9130377	3391	chr1	9464736	9467982	3247	337677	0.464089	4.03619	0.0775205	0.780686
chr1	9126987	9130377	3391	chr1	9472046	9475771	3726	345226	-3.45827	4.17466	2.93719	0.0865614
chr1	9126987	9130377	3391	chr1	9479498	9481290	1793	351712	-2.11484	3.88709	1.00394	0.31636
chr1	9126987	9130377	3391	chr1	9484561	9488337	3777	357767	-2.93507	4.03679	1.97986	0.159405
chr1	9126987	9130377	3391	chr1	9628452	9630984	2533	501036	-2.11484	3.88709	1.00394	0.31636
chr1	9126987	9130377	3391	chr1	9711253	9715818	4566	584853	-2.11484	3.88709	1.00394	0.31636
chr1	9126987	9130377	3391	chr1	9775804	9779669	3866	649054	0.469252	4.03353	0.0789089	0.778781
chr1	9126987	9130377	3391	chr1	9846197	9848701	2505	718767	-2.93507	4.03679	1.97986	0.159405
chr1	9126987	9130377	3391	chr1	9895552	9897379	1828	767783	2.57893	3.88376	1.80247	0.179414
chr1	9126987	9130377	3391	chr1	9907425	9912111	4687	781086	0.469252	4.03353	0.0789089	0.778781
chr1	9126987	9130377	3391	chr1	9922379	9926527	4149	795771	-2.10967	3.88438	1.00111	0.317041
chr1	9126987	9130377	3391	chr1	9969343	9971870	2528	841924	-2.10967	3.88438	1.00111	0.317041
chr1	9126987	9130377	3391	chr1	10092546	10095119	2574	965150	-2.10967	3.88438	1.00111	0.317041
chr1	9126987	9130377	3391	chr1	10531332	10536785	5454	1405376	2.57893	3.88376	1.80247	0.179414
chr1	9134858	9136911	2054	chr1	9188731	9190607	1877	53784	2.57893	3.88376	1.80247	0.179414
chr1	9134858	9136911	2054	chr1	9202869	9204309	1441	67704	-2.10967	3.88438	1.00111	0.317041
chr1	9134858	9136911	2054	chr1	9234454	9236482	2029	99583	-2.11484	3.88709	1.00394	0.31636
chr1	9134858	9136911	2054	chr1	9294155	9296678	2524	159532	-2.93507	4.03679	1.97986	0.159405
chr1	9134858	9136911	2054	chr1	9464736	9467982	3247	330474	-0.394819	4.51482	0.107759	0.74271
chr1	9134858	9136911	2054	chr1	9472046	9475771	3726	338024	-2.11484	3.88709	1.00394	0.31636
chr1	9134858	9136911	2054	chr1	9479498	9481290	1793	344509	3.44292	4.03292	3.53119	0.0602246
chr1	9134858	9136911	2054	chr1	9484561	9488337	3777	350564	-0.356139	4.17145	0.0538612	0.816476
chr1	9134858	9136911	2054	chr1	9647906	9651638	3733	513887	2.57893	3.88376	1.80247	0.179414
chr1	9134858	9136911	2054	chr1	9740271	9742218	1948	605360	-2.10967	3.88438	1.00111	0.317041
chr1	9134858	9136911	2054	chr1	9881709	9884826	3118	747383	2.64212	3.90778	1.85425	0.17329
chr1	9134858	9136911	2054	chr1	9922379	9926527	4149	788568	-2.10967	3.88438	1.00111	0.317041
chr1	9137906	9143657	5752	chr1	9158320	9159723	1404	18240	0.0187507	5.67671	0.000818062	0.977182
chr1	9137906	9143657	5752	chr1	9188731	9190607	1877	48887	1.33324	4.16825	0.807817	0.368766
chr1	9137906	9143657	5752	chr1	9234454	9236482	2029	94686	0.469252	4.03353	0.0789089	0.778781
chr1	9137906	9143657	5752	chr1	9294155	9296678	2524	154635	0.519764	4.51179	0.203568	0.651856
chr1	9137906	9143657	5752	chr1	9401998	9403822	1825	262128	2.57893	3.88376	1.80247	0.179414
chr1	9137906	9143657	5752	chr1	9422394	9424429	2036	282630	1.32808	4.17086	0.802402	0.370376
chr1	9137906	9143657	5752	chr1	9434974	9436569	1596	294990	3.44292	4.03292	3.53119	0.0602246
chr1	9137906	9143657	5752	chr1	9464736	9467982	3247	325577	-0.0105104	4.40754	4.81688e-05	0.994462
chr1	9137906	9143657	5752	chr1	9472046	9475771	3726	333127	-0.685172	4.6074	0.351456	0.55329
chr1	9137906	9143657	5752	chr1	9479498	9481290	1793	339612	1.33324	4.16825	0.807817	0.368766
chr1	9137906	9143657	5752	chr1	9484561	9488337	3777	345667	2.17057	4.78373	4.30074	0.0380958
chr1	9137906	9143657	5752	chr1	9597661	9600208	2548	458153	0.469252	4.03353	0.0789089	0.778781
chr1	9137906	9143657	5752	chr1	9628452	9630984	2533	488936	-0.35115	4.16885	0.0525494	0.818685
chr1	9137906	9143657	5752	chr1	9647906	9651638	3733	508990	-2.10967	3.88438	1.00111	0.317041
chr1	9137906	9143657	5752	chr1	9687977	9691246	3270	548830	0.519764	4.51179	0.203568	0.651856
chr1	9137906	9143657	5752	chr1	9711253	9715818	4566	572754	0.502848	4.29677	0.142344	0.705962
chr1	9137906	9143657	5752	chr1	9733380	9734698	1319	593257	-2.10967	3.88438	1.00111	0.317041
chr1	9137906	9143657	5752	chr1	9746649	9748796	2148	606941	2.57893	3.88376	1.80247	0.179414
chr1	9137906	9143657	5752	chr1	9775804	9779669	3866	636955	-2.10967	3.88438	1.00111	0.317041
chr1	9137906	9143657	5752	chr1	9846197	9848701	2505	706667	-2.10967	3.88438	1.00111	0.317041
chr1	9137906	9143657	5752	chr1	9895552	9897379	1828	755684	-2.94007	4.03946	1.98523	0.15884
chr1	9137906	9143657	5752	chr1	9907425	9912111	4687	768986	0.502848	4.29677	0.142344	0.705962
chr1	9137906	9143657	5752	chr1	9922379	9926527	4149	783671	0.564265	4.32027	0.17456	0.676091
chr1	9137906	9143657	5752	chr1	10002037	10004636	2600	862555	-2.11484	3.88709	1.00394	0.31636
chr1	9137906	9143657	5752	chr1	10457928	10460418	2491	1318391	-2.11484	3.88709	1.00394	0.31636
chr1	9137906	9143657	5752	chr1	10752673	10753939	1267	1612524	2.57893	3.88376	1.80247	0.179414
chr1	9158320	9159723	1404	chr1	9188731	9190607	1877	30647	2.57893	3.88376	1.80247	0.179414
chr1	9158320	9159723	1404	chr1	9294155	9296678	2524	136395	-2.11484	3.88709	1.00394	0.31636
chr1	9158320	9159723	1404	chr1	10726596	10728285	1690	1568419	-2.11484	3.88709	1.00394	0.31636
chr1	9188731	9190607	1877	chr1	9202869	9204309	1441	13920	2.57893	3.88376	1.80247	0.179414
chr1	9188731	9190607	1877	chr1	9401998	9403822	1825	213241	-2.11484	3.88709	1.00394	0.31636
chr1	9188731	9190607	1877	chr1	9464736	9467982	3247	276690	-2.10967	3.88438	1.00111	0.317041
chr1	9188731	9190607	1877	chr1	9484561	9488337	3777	296780	1.32808	4.17086	0.802402	0.370376
chr1	9188731	9190607	1877	chr1	9775804	9779669	3866	588067	2.57893	3.88376	1.80247	0.179414
chr1	9202869	9204309	1441	chr1	9294155	9296678	2524	91827	-2.11484	3.88709	1.00394	0.31636
chr1	9202869	9204309	1441	chr1	9422394	9424429	2036	219822	-2.10967	3.88438	1.00111	0.317041
chr1	9202869	9204309	1441	chr1	9484561	9488337	3777	282860	2.57893	3.88376	1.80247	0.179414
chr1	9202869	9204309	1441	chr1	9711253	9715818	4566	509946	2.57893	3.88376	1.80247	0.179414
chr1	9202869	9204309	1441	chr1	9907425	9912111	4687	706179	-2.11484	3.88709	1.00394	0.31636
chr1	9202869	9204309	1441	chr1	10009103	10012132	3030	807028	-2.10967	3.88438	1.00111	0.317041
chr1	9234454	9236482	2029	chr1	9294155	9296678	2524	59948	-2.10967	3.88438	1.00111	0.317041
chr1	9234454	9236482	2029	chr1	9464736	9467982	3247	230891	-2.11484	3.88709	1.00394	0.31636
chr1	9234454	9236482	2029	chr1	9484561	9488337	3777	250981	0.469252	4.03353	0.0789089	0.778781
chr1	9234454	9236482	2029	chr1	9907425	9912111	4687	674300	-2.10967	3.88438	1.00111	0.317041
chr1	9294155	9296678	2524	chr1	9422394	9424429	2036	127995	-2.11484	3.88709	1.00394	0.31636
chr1	9294155	9296678	2524	chr1	9464736	9467982	3247	170942	-2.11484	3.88709	1.00394	0.31636
chr1	9294155	9296678	2524	chr1	9479498	9481290	1793	184977	-2.10967	3.88438	1.00111	0.317041
chr1	9294155	9296678	2524	chr1	9484561	9488337	3777	191032	-3.4486	4.16944	2.92196	0.0873815
chr1	9294155	9296678	2524	chr1	9647906	9651638	3733	354355	-2.11484	3.88709	1.00394	0.31636
chr1	9294155	9296678	2524	chr1	9711253	9715818	4566	418119	2.57893	3.88376	1.80247	0.179414
chr1	9294155	9296678	2524	chr1	9846197	9848701	2505	552032	2.57893	3.88376	1.80247	0.179414
chr1	9294155	9296678	2524	chr1	9907425	9912111	4687	614351	2.57893	3.88376	1.80247	0.179414
chr1	9294155	9296678	2524	chr1	10002037	10004636	2600	707920	-2.10967	3.88438	1.00111	0.317041
chr1	9294155	9296678	2524	chr1	10531332	10536785	5454	1238642	2.57893	3.88376	1.80247	0.179414
chr1	9401998	9403822	1825	chr1	9422394	9424429	2036	20501	2.57893	3.88376	1.80247	0.179414
chr1	9401998	9403822	1825	chr1	9434974	9436569	1596	32861	-2.11484	3.88709	1.00394	0.31636
chr1	9401998	9403822	1825	chr1	9479498	9481290	1793	77484	-2.10967	3.88438	1.00111	0.317041
chr1	9401998	9403822	1825	chr1	9484561	9488337	3777	83539	-0.356139	4.17145	0.0538612	0.816476
chr1	9401998	9403822	1825	chr1	9907425	9912111	4687	506858	-2.10967	3.88438	1.00111	0.317041
chr1	9401998	9403822	1825	chr1	10249115	10250717	1603	847006	-2.94007	4.03946	1.98523	0.15884
chr1	9422394	9424429	2036	chr1	9434974	9436569	1596	12360	0.469252	4.03353	0.0789089	0.778781
chr1	9422394	9424429	2036	chr1	9440568	9441891	1324	17818	0.469252	4.03353	0.0789089	0.778781
chr1	9422394	9424429	2036	chr1	9464736	9467982	3247	42947	1.92329	4.3145	1.94161	0.163493
chr1	9422394	9424429	2036	chr1	9472046	9475771	3726	50497	-2.94007	4.03946	1.98523	0.15884
chr1	9422394	9424429	2036	chr1	9479498	9481290	1793	56982	2.57893	3.88376	1.80247	0.179414
chr1	9422394	9424429	2036	chr1	9484561	9488337	3777	63037	-1.56735	4.52033	1.40086	0.23658
chr1	9422394	9424429	2036	chr1	9711253	9715818	4566	290124	2.57893	3.88376	1.80247	0.179414
chr1	9422394	9424429	2036	chr1	9907425	9912111	4687	486356	-2.11484	3.88709	1.00394	0.31636
chr1	9422394	9424429	2036	chr1	11071531	11074085	2555	1649396	-2.10967	3.88438	1.00111	0.317041
chr1	9434974	9436569	1596	chr1	9440568	9441891	1324	5458	0.464089	4.03619	0.0775205	0.780686
chr1	9434974	9436569	1596	chr1	9464736	9467982	3247	30587	0.574257	4.31509	0.180164	0.671232
chr1	9434974	9436569	1596	chr1	9472046	9475771	3726	38137	-0.356139	4.17145	0.0538612	0.816476
chr1	9434974	9436569	1596	chr1	9484561	9488337	3777	50677	1.32808	4.17086	0.802402	0.370376
chr1	9434974	9436569	1596	chr1	9907425	9912111	4687	473996	2.64212	3.90778	1.85425	0.17329
chr1	9434974	9436569	1596	chr1	10009103	10012132	3030	574846	-2.93507	4.03679	1.97986	0.159405
chr1	9440568	9441891	1324	chr1	9464736	9467982	3247	25129	2.57893	3.88376	1.80247	0.179414
chr1	9440568	9441891	1324	chr1	9472046	9475771	3726	32679	-0.356139	4.17145	0.0538612	0.816476
chr1	9440568	9441891	1324	chr1	9484561	9488337	3777	45219	1.03813	4.40697	0.707525	0.400267
chr1	9440568	9441891	1324	chr1	9575303	9577567	2265	135205	-2.11484	3.88709	1.00394	0.31636
chr1	9440568	9441891	1324	chr1	11118393	11121293	2901	1678613	-2.11484	3.88709	1.00394	0.31636
chr1	9464736	9467982	3247	chr1	9472046	9475771	3726	7549	0.595032	6.19053	0.932192	0.334294
chr1	9464736	9467982	3247	chr1	9479498	9481290	1793	14035	2.03627	5.03587	4.7728	0.0289127
chr1	9464736	9467982	3247	chr1	9484561	9488337	3777	20090	-1.03489	6.33652	2.69466	0.100685
chr1	9464736	9467982	3247	chr1	9575303	9577567	2265	110076	-2.10967	3.88438	1.00111	0.317041
chr1	9464736	9467982	3247	chr1	9597661	9600208	2548	132575	2.57893	3.88376	1.80247	0.179414
chr1	9464736	9467982	3247	chr1	9628452	9630984	2533	163359	0.469252	4.03353	0.0789089	0.778781
chr1	9464736	9467982	3247	chr1	9647906	9651638	3733	183413	2.57893	3.88376	1.80247	0.179414
chr1	9464736	9467982	3247	chr1	9740271	9742218	1948	274885	2.57893	3.88376	1.80247	0.179414
chr1	9464736	9467982	3247	chr1	9775804	9779669	3866	311377	3.44292	4.03292	3.53119	0.0602246
chr1	9464736	9467982	3247	chr1	9846197	9848701	2505	381090	0.464089	4.03619	0.0775205	0.780686
chr1	9464736	9467982	3247	chr1	9881709	9884826	3118	416908	2.57893	3.88376	1.80247	0.179414
chr1	9464736	9467982	3247	chr1	9907425	9912111	4687	443409	0.464089	4.03619	0.0775205	0.780686
chr1	9464736	9467982	3247	chr1	9922379	9926527	4149	458094	2.57893	3.88376	1.80247	0.179414
chr1	9464736	9467982	3247	chr1	10002037	10004636	2600	536977	-2.10967	3.88438	1.00111	0.317041
chr1	9464736	9467982	3247	chr1	11071531	11074085	2555	1606449	-2.10967	3.88438	1.00111	0.317041
chr1	9472046	9475771	3726	chr1	9479498	9481290	1793	6485	-0.651064	5.36251	0.611713	0.434144
chr1	9472046	9475771	3726	chr1	9484561	9488337	3777	12540	-0.998517	6.14408	2.23883	0.134582
chr1	9472046	9475771	3726	chr1	9575303	9577567	2265	102526	-2.10967	3.88438	1.00111	0.317041
chr1	9472046	9475771	3726	chr1	9597661	9600208	2548	125026	0.464089	4.03619	0.0775205	0.780686
chr1	9472046	9475771	3726	chr1	9647906	9651638	3733	175863	-2.11484	3.88709	1.00394	0.31636
chr1	9472046	9475771	3726	chr1	9846197	9848701	2505	373540	2.57893	3.88376	1.80247	0.179414
chr1	9472046	9475771	3726	chr1	9907425	9912111	4687	435859	2.57893	3.88376	1.80247	0.179414
chr1	9472046	9475771	3726	chr1	9922379	9926527	4149	450544	-2.10967	3.88438	1.00111	0.317041
chr1	9472046	9475771	3726	chr1	10002037	10004636	2600	529428	2.57893	3.88376	1.80247	0.179414
chr1	9472046	9475771	3726	chr1	11465995	11469273	3279	1993725	2.57893	3.88376	1.80247	0.179414
chr1	9479498	9481290	1793	chr1	9484561	9488337	3777	6055	-1.44363	6.09729	4.31282	0.0378262
chr1	9479498	9481290	1793	chr1	9711253	9715818	4566	233141	-2.11484	3.88709	1.00394	0.31636
chr1	9479498	9481290	1793	chr1	9746649	9748796	2148	267328	2.57893	3.88376	1.80247	0.179414
chr1	9479498	9481290	1793	chr1	9775804	9779669	3866	297342	-2.10967	3.88438	1.00111	0.317041
chr1	9479498	9481290	1793	chr1	9846197	9848701	2505	367055	-2.11484	3.88709	1.00394	0.31636
chr1	9479498	9481290	1793	chr1	9881709	9884826	3118	402873	-2.10967	3.88438	1.00111	0.317041
chr1	9479498	9481290	1793	chr1	9907425	9912111	4687	429374	-2.11484	3.88709	1.00394	0.31636
chr1	9479498	9481290	1793	chr1	9922379	9926527	4149	444059	-2.11484	3.88709	1.00394	0.31636
chr1	9479498	9481290	1793	chr1	10457928	10460418	2491	978779	-2.10967	3.88438	1.00111	0.317041
chr1	9484561	9488337	3777	chr1	9575303	9577567	2265	89986	0.469252	4.03353	0.0789089	0.778781
chr1	9484561	9488337	3777	chr1	9597661	9600208	2548	112485	3.44292	4.03292	3.53119	0.0602246
chr1	9484561	9488337	3777	chr1	9628452	9630984	2533	143269	-2.94007	4.03946	1.98523	0.15884
chr1	9484561	9488337	3777	chr1	9647906	9651638	3733	163323	0.53245	4.05736	0.0967166	0.755806
chr1	9484561	9488337	3777	chr1	9687977	9691246	3270	203162	2.57893	3.88376	1.80247	0.179414
chr1	9484561	9488337	3777	chr1	9711253	9715818	4566	227086	1.32808	4.17086	0.802402	0.370376
chr1	9484561	9488337	3777	chr1	9740271	9742218	1948	254795	2.57893	3.88376	1.80247	0.179414
chr1	9484561	9488337	3777	chr1	9746649	9748796	2148	261273	2.57893	3.88376	1.80247	0.179414
chr1	9484561	9488337	3777	chr1	9846197	9848701	2505	361000	-2.11484	3.88709	1.00394	0.31636
chr1	9484561	9488337	3777	chr1	9881709	9884826	3118	396818	-2.10967	3.88438	1.00111	0.317041
chr1	9484561	9488337	3777	chr1	9907425	9912111	4687	423319	-1.24945	4.4056	0.828221	0.362787
chr1	9484561	9488337	3777	chr1	9922379	9926527	4149	438004	-2.11484	3.88709	1.00394	0.31636
chr1	9484561	9488337	3777	chr1	10002037	10004636	2600	516887	2.57893	3.88376	1.80247	0.179414
chr1	9484561	9488337	3777	chr1	10009103	10012132	3030	524168	-2.10967	3.88438	1.00111	0.317041
chr1	9484561	9488337	3777	chr1	10092546	10095119	2574	607383	2.57893	3.88376	1.80247	0.179414
chr1	9484561	9488337	3777	chr1	10249115	10250717	1603	763467	-2.11484	3.88709	1.00394	0.31636
chr1	9484561	9488337	3777	chr1	10457928	10460418	2491	972724	-2.10967	3.88438	1.00111	0.317041
chr1	9484561	9488337	3777	chr1	10531332	10536785	5454	1047609	-2.11484	3.88709	1.00394	0.31636
chr1	9484561	9488337	3777	chr1	11071531	11074085	2555	1586359	-2.10967	3.88438	1.00111	0.317041
chr1	9484561	9488337	3777	chr1	11332475	11335207	2733	1847392	-2.11484	3.88709	1.00394	0.31636
chr1	9575303	9577567	2265	chr1	9628452	9630984	2533	53283	-3.45827	4.17466	2.93719	0.0865614
chr1	9575303	9577567	2265	chr1	9687977	9691246	3270	113176	2.57893	3.88376	1.80247	0.179414
chr1	9575303	9577567	2265	chr1	9740271	9742218	1948	164809	-2.10967	3.88438	1.00111	0.317041
chr1	9575303	9577567	2265	chr1	9922379	9926527	4149	348018	2.57893	3.88376	1.80247	0.179414
chr1	9575303	9577567	2265	chr1	10092546	10095119	2574	517397	-2.10967	3.88438	1.00111	0.317041
chr1	9597661	9600208	2548	chr1	9647906	9651638	3733	50837	2.57893	3.88376	1.80247	0.179414
chr1	9597661	9600208	2548	chr1	9687977	9691246	3270	90677	-2.93507	4.03679	1.97986	0.159405
chr1	9597661	9600208	2548	chr1	9711253	9715818	4566	114601	2.57893	3.88376	1.80247	0.179414
chr1	9597661	9600208	2548	chr1	9907425	9912111	4687	310833	-3.4486	4.16944	2.92196	0.0873815
chr1	9597661	9600208	2548	chr1	9922379	9926527	4149	325518	-2.10967	3.88438	1.00111	0.317041
chr1	9597661	9600208	2548	chr1	10009103	10012132	3030	411683	-2.10967	3.88438	1.00111	0.317041
chr1	9597661	9600208	2548	chr1	10019516	10021792	2277	421719	-2.10967	3.88438	1.00111	0.317041
chr1	9597661	9600208	2548	chr1	10092546	10095119	2574	494898	3.44292	4.03292	3.53119	0.0602246
chr1	9628452	9630984	2533	chr1	9746649	9748796	2148	118004	-2.11484	3.88709	1.00394	0.31636
chr1	9628452	9630984	2533	chr1	9775804	9779669	3866	148018	1.33324	4.16825	0.807817	0.368766
chr1	9628452	9630984	2533	chr1	9846197	9848701	2505	217731	-2.10967	3.88438	1.00111	0.317041
chr1	9628452	9630984	2533	chr1	9907425	9912111	4687	280050	-2.93507	4.03679	1.97986	0.159405
chr1	9628452	9630984	2533	chr1	9922379	9926527	4149	294735	-2.11484	3.88709	1.00394	0.31636
chr1	9647906	9651638	3733	chr1	9687977	9691246	3270	39839	0.464089	4.03619	0.0775205	0.780686
chr1	9647906	9651638	3733	chr1	9711253	9715818	4566	63763	-3.82838	4.29281	3.84501	0.0498944
chr1	9647906	9651638	3733	chr1	9746649	9748796	2148	97950	0.464089	4.03619	0.0775205	0.780686
chr1	9647906	9651638	3733	chr1	9775804	9779669	3866	127964	0.51284	4.29165	0.147421	0.701013
chr1	9647906	9651638	3733	chr1	9846197	9848701	2505	197677	0.469252	4.03353	0.0789089	0.778781
chr1	9647906	9651638	3733	chr1	9881709	9884826	3118	233495	0.464089	4.03619	0.0775205	0.780686
chr1	9647906	9651638	3733	chr1	9895552	9897379	1828	246693	-2.10967	3.88438	1.00111	0.317041
chr1	9647906	9651638	3733	chr1	9907425	9912111	4687	259996	1.32808	4.17086	0.802402	0.370376
chr1	9647906	9651638	3733	chr1	9922379	9926527	4149	274681	-1.25412	4.40811	0.834135	0.36108
chr1	9647906	9651638	3733	chr1	9969343	9971870	2528	320834	-2.10967	3.88438	1.00111	0.317041
chr1	9647906	9651638	3733	chr1	10092546	10095119	2574	444060	3.44292	4.03292	3.53119	0.0602246
chr1	9647906	9651638	3733	chr1	10752673	10753939	1267	1103534	2.57893	3.88376	1.80247	0.179414
chr1	9647906	9651638	3733	chr1	11354057	11356388	2332	1705450	-2.10967	3.88438	1.00111	0.317041
chr1	9687977	9691246	3270	chr1	9711253	9715818	4566	23924	0.534445	5.60523	0.546602	0.459709
chr1	9687977	9691246	3270	chr1	9733380	9734698	1319	44427	1.85835	4.29362	1.82579	0.176626
chr1	9687977	9691246	3270	chr1	9740271	9742218	1948	51633	-0.879339	4.29735	0.373495	0.541106
chr1	9687977	9691246	3270	chr1	9746649	9748796	2148	58111	-4.14172	4.41372	4.7795	0.0288005
chr1	9687977	9691246	3270	chr1	9775804	9779669	3866	88125	0.25135	5.40334	0.104266	0.746769
chr1	9687977	9691246	3270	chr1	9846197	9848701	2505	157837	-0.879339	4.29735	0.373495	0.541106
chr1	9687977	9691246	3270	chr1	9881709	9884826	3118	193656	-0.35115	4.16885	0.0525494	0.818685
chr1	9687977	9691246	3270	chr1	9907425	9912111	4687	220156	0.516994	4.86762	0.29473	0.587205
chr1	9687977	9691246	3270	chr1	9922379	9926527	4149	234841	-0.694248	4.61225	0.360433	0.548266
chr1	9687977	9691246	3270	chr1	9932609	9934375	1767	243880	2.57893	3.88376	1.80247	0.179414
chr1	9687977	9691246	3270	chr1	10002037	10004636	2600	313725	0.510073	4.51674	0.196607	0.657474
chr1	9687977	9691246	3270	chr1	10009103	10012132	3030	321006	-1.25412	4.40811	0.834135	0.36108
chr1	9687977	9691246	3270	chr1	10019516	10021792	2277	331042	-2.10967	3.88438	1.00111	0.317041
chr1	9687977	9691246	3270	chr1	10092546	10095119	2574	404221	-2.10967	3.88438	1.00111	0.317041
chr1	9687977	9691246	3270	chr1	10457928	10460418	2491	769561	-3.46312	4.17727	2.94485	0.0861515
chr1	9687977	9691246	3270	chr1	10489450	10491688	2239	800957	-2.93008	4.03414	1.97452	0.159969
chr1	9687977	9691246	3270	chr1	10531332	10536785	5454	844447	2.57893	3.88376	1.80247	0.179414
chr1	9687977	9691246	3270	chr1	11286000	11289944	3945	1598360	0.464089	4.03619	0.0775205	0.780686
chr1	9711253	9715818	4566	chr1	9733380	9734698	1319	20503	-0.703364	4.61711	0.36957	0.543239
chr1	9711253	9715818	4566	chr1	9740271	9742218	1948	27709	0.222959	4.78532	0.0504504	0.822281
chr1	9711253	9715818	4566	chr1	9746649	9748796	2148	34187	-0.113318	4.73035	0.0115757	0.91432
chr1	9711253	9715818	4566	chr1	9775804	9779669	3866	64201	-0.00568427	4.40503	1.16462e-05	0.997277
chr1	9711253	9715818	4566	chr1	9846197	9848701	2505	133913	0.213864	4.79001	0.0466303	0.829034
chr1	9711253	9715818	4566	chr1	9881709	9884826	3118	169732	1.32808	4.17086	0.802402	0.370376
chr1	9711253	9715818	4566	chr1	9895552	9897379	1828	182930	-0.361142	4.17406	0.0551936	0.814261
chr1	9711253	9715818	4566	chr1	9907425	9912111	4687	196232	1.38728	4.98284	2.21338	0.136819
chr1	9711253	9715818	4566	chr1	9922379	9926527	4149	210917	-0.0153495	4.41006	0.000109797	0.99164
chr1	9711253	9715818	4566	chr1	9932609	9934375	1767	219956	2.57893	3.88376	1.80247	0.179414
chr1	9711253	9715818	4566	chr1	9940361	9942428	2068	227859	-2.10967	3.88438	1.00111	0.317041
chr1	9711253	9715818	4566	chr1	10002037	10004636	2600	289801	-0.879339	4.29735	0.373495	0.541106
chr1	9711253	9715818	4566	chr1	10009103	10012132	3030	297082	2.57893	3.88376	1.80247	0.179414
chr1	9711253	9715818	4566	chr1	10092546	10095119	2574	380297	2.57893	3.88376	1.80247	0.179414
chr1	9711253	9715818	4566	chr1	10752673	10753939	1267	1039770	-2.10967	3.88438	1.00111	0.317041
chr1	9733380	9734698	1319	chr1	9746649	9748796	2148	13683	0.464089	4.03619	0.0775205	0.780686
chr1	9733380	9734698	1319	chr1	9775804	9779669	3866	43697	0.514925	4.51426	0.200077	0.654658
chr1	9733380	9734698	1319	chr1	9907425	9912111	4687	175729	0.469252	4.03353	0.0789089	0.778781
chr1	9733380	9734698	1319	chr1	9922379	9926527	4149	190414	-2.10967	3.88438	1.00111	0.317041
chr1	9733380	9734698	1319	chr1	10009103	10012132	3030	276578	2.57893	3.88376	1.80247	0.179414
chr1	9740271	9742218	1948	chr1	9746649	9748796	2148	6478	0.140141	4.60928	0.0165873	0.897522
chr1	9740271	9742218	1948	chr1	9775804	9779669	3866	36492	-0.390133	4.51235	0.105361	0.745489
chr1	9740271	9742218	1948	chr1	9846197	9848701	2505	106204	3.44292	4.03292	3.53119	0.0602246
chr1	9740271	9742218	1948	chr1	9907425	9912111	4687	168523	-0.8745	4.29479	0.369729	0.543152
chr1	9740271	9742218	1948	chr1	9922379	9926527	4149	183208	0.469252	4.03353	0.0789089	0.778781
chr1	9740271	9742218	1948	chr1	9932609	9934375	1767	192247	2.57893	3.88376	1.80247	0.179414
chr1	9740271	9742218	1948	chr1	10009103	10012132	3030	269373	-3.45827	4.17466	2.93719	0.0865614
chr1	9740271	9742218	1948	chr1	10092546	10095119	2574	352588	-2.10967	3.88438	1.00111	0.317041
chr1	9740271	9742218	1948	chr1	10457928	10460418	2491	717928	-2.10967	3.88438	1.00111	0.317041
chr1	9740271	9742218	1948	chr1	10531332	10536785	5454	792814	-2.10967	3.88438	1.00111	0.317041
chr1	9740271	9742218	1948	chr1	11286000	11289944	3945	1546727	-2.11484	3.88709	1.00394	0.31636
chr1	9746649	9748796	2148	chr1	9775804	9779669	3866	30014	1.71409	4.6106	2.35708	0.124716
chr1	9746649	9748796	2148	chr1	9846197	9848701	2505	99726	2.54448	4.50821	4.15657	0.0414733
chr1	9746649	9748796	2148	chr1	9907425	9912111	4687	162045	0.502848	4.29677	0.142344	0.705962
chr1	9746649	9748796	2148	chr1	9922379	9926527	4149	176730	-0.8745	4.29479	0.369729	0.543152
chr1	9746649	9748796	2148	chr1	9940361	9942428	2068	193672	-2.11484	3.88709	1.00394	0.31636
chr1	9746649	9748796	2148	chr1	10002037	10004636	2600	255614	2.57893	3.88376	1.80247	0.179414
chr1	9746649	9748796	2148	chr1	10009103	10012132	3030	262895	-2.93507	4.03679	1.97986	0.159405
chr1	9746649	9748796	2148	chr1	10457928	10460418	2491	711450	2.57893	3.88376	1.80247	0.179414
chr1	9746649	9748796	2148	chr1	10489450	10491688	2239	742846	-2.11484	3.88709	1.00394	0.31636
chr1	9775804	9779669	3866	chr1	9846197	9848701	2505	69712	-0.406843	4.78584	0.155025	0.693779
chr1	9775804	9779669	3866	chr1	9881709	9884826	3118	105531	2.57893	3.88376	1.80247	0.179414
chr1	9775804	9779669	3866	chr1	9895552	9897379	1828	118729	-2.93507	4.03679	1.97986	0.159405
chr1	9775804	9779669	3866	chr1	9907425	9912111	4687	132031	-0.658732	5.64141	0.778154	0.377706
chr1	9775804	9779669	3866	chr1	9922379	9926527	4149	146716	-0.860991	5.46743	1.11914	0.290104
chr1	9775804	9779669	3866	chr1	9932609	9934375	1767	155755	0.579535	4.5349	0.248538	0.618107
chr1	9775804	9779669	3866	chr1	9940361	9942428	2068	163658	-0.35115	4.16885	0.0525494	0.818685
chr1	9775804	9779669	3866	chr1	9969343	9971870	2528	192870	-2.11484	3.88709	1.00394	0.31636
chr1	9775804	9779669	3866	chr1	10002037	10004636	2600	225600	-4.13717	4.4112	4.76797	0.0289939
chr1	9775804	9779669	3866	chr1	10009103	10012132	3030	232881	3.44292	4.03292	3.53119	0.0602246
chr1	9775804	9779669	3866	chr1	10092546	10095119	2574	316096	-0.884191	4.29992	0.37729	0.539057
chr1	9775804	9779669	3866	chr1	10371508	10373186	1679	594610	-2.10967	3.88438	1.00111	0.317041
chr1	9775804	9779669	3866	chr1	10457928	10460418	2491	681436	-2.11484	3.88709	1.00394	0.31636
chr1	9775804	9779669	3866	chr1	10752673	10753939	1267	975569	-2.11484	3.88709	1.00394	0.31636
chr1	9846197	9848701	2505	chr1	9881709	9884826	3118	35818	-0.874578	5.21876	0.983521	0.321331
chr1	9846197	9848701	2505	chr1	9895552	9897379	1828	49016	-0.597395	5.09139	0.43013	0.511925
chr1	9846197	9848701	2505	chr1	9907425	9912111	4687	62319	-0.387904	6.74407	0.464225	0.495656
chr1	9846197	9848701	2505	chr1	9922379	9926527	4149	77004	-0.240367	6.55477	0.175925	0.674899
chr1	9846197	9848701	2505	chr1	9932609	9934375	1767	86043	0.218417	4.78766	0.0485238	0.825652
chr1	9846197	9848701	2505	chr1	9940361	9942428	2068	93945	2.29899	4.42967	3.10431	0.0780852
chr1	9846197	9848701	2505	chr1	10002037	10004636	2600	155887	-0.698801	4.61468	0.364981	0.545753
chr1	9846197	9848701	2505	chr1	10009103	10012132	3030	163168	-4.13717	4.4112	4.76797	0.0289939
chr1	9846197	9848701	2505	chr1	10019516	10021792	2277	173205	-0.356139	4.17145	0.0538612	0.816476
chr1	9846197	9848701	2505	chr1	10092546	10095119	2574	246383	-0.00568427	4.40503	1.16462e-05	0.997277
chr1	9846197	9848701	2505	chr1	10531332	10536785	5454	686609	2.57893	3.88376	1.80247	0.179414
chr1	9846197	9848701	2505	chr1	10999383	11001403	2021	1152944	-2.10967	3.88438	1.00111	0.317041
chr1	9846197	9848701	2505	chr1	11071531	11074085	2555	1225359	2.57893	3.88376	1.80247	0.179414
chr1	9846197	9848701	2505	chr1	11098488	11100303	1816	1251946	2.57893	3.88376	1.80247	0.179414
chr1	9846197	9848701	2505	chr1	11158677	11160770	2094	1312274	-2.10967	3.88438	1.00111	0.317041
chr1	9846197	9848701	2505	chr1	11321479	11323492	2014	1475036	2.64212	3.90778	1.85425	0.17329
chr1	9881709	9884826	3118	chr1	9895552	9897379	1828	13198	-2.93507	4.03679	1.97986	0.159405
chr1	9881709	9884826	3118	chr1	9907425	9912111	4687	26500	0.168331	6.20166	0.0707159	0.790297
chr1	9881709	9884826	3118	chr1	9922379	9926527	4149	41185	-1.31776	5.24095	2.03265	0.153952
chr1	9881709	9884826	3118	chr1	9932609	9934375	1767	50224	-2.94007	4.03946	1.98523	0.15884
chr1	9881709	9884826	3118	chr1	10092546	10095119	2574	210565	-2.10967	3.88438	1.00111	0.317041
chr1	9881709	9884826	3118	chr1	10249115	10250717	1603	366648	2.57893	3.88376	1.80247	0.179414
chr1	9881709	9884826	3118	chr1	10531332	10536785	5454	650791	-2.10967	3.88438	1.00111	0.317041
chr1	9895552	9897379	1828	chr1	9907425	9912111	4687	13302	-0.131302	6.7135	0.0540435	0.816171
chr1	9895552	9897379	1828	chr1	9922379	9926527	4149	27987	-0.235167	4.94193	0.0610409	0.804858
chr1	9895552	9897379	1828	chr1	9932609	9934375	1767	37026	-0.356139	4.17145	0.0538612	0.816476
chr1	9907425	9912111	4687	chr1	9922379	9926527	4149	14685	-0.310541	7.65712	0.421672	0.516104
chr1	9907425	9912111	4687	chr1	9932609	9934375	1767	23724	0.0509072	4.43083	0.00141707	0.969972
chr1	9907425	9912111	4687	chr1	9940361	9942428	2068	31626	-3.83774	4.29794	3.86427	0.0493245
chr1	9907425	9912111	4687	chr1	9969343	9971870	2528	60838	-3.45343	4.17205	2.92956	0.0869714
chr1	9907425	9912111	4687	chr1	10002037	10004636	2600	93568	-0.0332788	4.87045	0.00104413	0.974222
chr1	9907425	9912111	4687	chr1	10009103	10012132	3030	100849	-0.163974	4.70275	0.0233493	0.878552
chr1	9907425	9912111	4687	chr1	10092546	10095119	2574	184064	-1.25412	4.40811	0.834135	0.36108
chr1	9907425	9912111	4687	chr1	10489450	10491688	2239	580801	-3.45343	4.17205	2.92956	0.0869714
chr1	9907425	9912111	4687	chr1	10531332	10536785	5454	624290	-3.45343	4.17205	2.92956	0.0869714
chr1	9907425	9912111	4687	chr1	11286000	11289944	3945	1378204	0.464089	4.03619	0.0775205	0.780686
chr1	9907425	9912111	4687	chr1	11332475	11335207	2733	1424073	-2.10967	3.88438	1.00111	0.317041
chr1	9907425	9912111	4687	chr1	11708882	11712713	3832	1801029	-2.10967	3.88438	1.00111	0.317041
chr1	9922379	9926527	4149	chr1	9932609	9934375	1767	9039	1.11649	4.88953	1.35587	0.244255
chr1	9922379	9926527	4149	chr1	9940361	9942428	2068	16941	-0.113318	4.73035	0.0115757	0.91432
chr1	9922379	9926527	4149	chr1	9969343	9971870	2528	46153	-2.94007	4.03946	1.98523	0.15884
chr1	9922379	9926527	4149	chr1	10002037	10004636	2600	78883	0.363474	5.10355	0.173271	0.677221
chr1	9922379	9926527	4149	chr1	10009103	10012132	3030	86164	0.821109	4.78479	0.686904	0.407219
chr1	9922379	9926527	4149	chr1	10019516	10021792	2277	96201	1.32808	4.17086	0.802402	0.370376
chr1	9922379	9926527	4149	chr1	10092546	10095119	2574	169379	-3.4486	4.16944	2.92196	0.0873815
chr1	9922379	9926527	4149	chr1	10457928	10460418	2491	534720	1.33324	4.16825	0.807817	0.368766
chr1	9922379	9926527	4149	chr1	10489450	10491688	2239	566116	2.57893	3.88376	1.80247	0.179414
chr1	9922379	9926527	4149	chr1	11158677	11160770	2094	1235270	2.57893	3.88376	1.80247	0.179414
chr1	9922379	9926527	4149	chr1	11465995	11469273	3279	1543181	-2.11484	3.88709	1.00394	0.31636
chr1	9922379	9926527	4149	chr1	11864280	11868388	4109	1941881	-2.10967	3.88438	1.00111	0.317041
chr1	9932609	9934375	1767	chr1	9940361	9942428	2068	7902	0.469252	4.03353	0.0789089	0.778781
chr1	9932609	9934375	1767	chr1	10009103	10012132	3030	77125	-2.11484	3.88709	1.00394	0.31636
chr1	9932609	9934375	1767	chr1	10019516	10021792	2277	87162	-2.10967	3.88438	1.00111	0.317041
chr1	9932609	9934375	1767	chr1	10092546	10095119	2574	160340	2.57893	3.88376	1.80247	0.179414
chr1	9940361	9942428	2068	chr1	10009103	10012132	3030	69223	-2.10967	3.88438	1.00111	0.317041
chr1	9940361	9942428	2068	chr1	11063109	11064335	1227	1122327	-2.11484	3.88709	1.00394	0.31636
chr1	9969343	9971870	2528	chr1	10009103	10012132	3030	40011	2.57893	3.88376	1.80247	0.179414
chr1	9969343	9971870	2528	chr1	10531332	10536785	5454	563452	-2.10967	3.88438	1.00111	0.317041
chr1	10002037	10004636	2600	chr1	10009103	10012132	3030	7281	-0.607934	5.66396	0.661501	0.416031
chr1	10002037	10004636	2600	chr1	10092546	10095119	2574	90496	-2.93008	4.03414	1.97452	0.159969
chr1	10002037	10004636	2600	chr1	10489450	10491688	2239	487232	2.57893	3.88376	1.80247	0.179414
chr1	10002037	10004636	2600	chr1	10531332	10536785	5454	530722	-2.11484	3.88709	1.00394	0.31636
chr1	10002037	10004636	2600	chr1	11286000	11289944	3945	1284635	-2.11484	3.88709	1.00394	0.31636
chr1	10002037	10004636	2600	chr1	11739774	11742949	3176	1738025	-2.11484	3.88709	1.00394	0.31636
chr1	10002037	10004636	2600	chr1	11967064	11970949	3886	1965670	-2.10967	3.88438	1.00111	0.317041
chr1	10009103	10012132	3030	chr1	10019516	10021792	2277	10036	-0.163974	4.70275	0.0233493	0.878552
chr1	10009103	10012132	3030	chr1	10092546	10095119	2574	83215	-0.415669	4.79054	0.161592	0.687695
chr1	10009103	10012132	3030	chr1	10531332	10536785	5454	523441	-2.10967	3.88438	1.00111	0.317041
chr1	10009103	10012132	3030	chr1	11071531	11074085	2555	1062190	-2.10967	3.88438	1.00111	0.317041
chr1	10009103	10012132	3030	chr1	11286000	11289944	3945	1277354	-3.46312	4.17727	2.94485	0.0861515
chr1	10019516	10021792	2277	chr1	10092546	10095119	2574	73178	-2.10967	3.88438	1.00111	0.317041
chr1	10092546	10095119	2574	chr1	10249115	10250717	1603	156083	-2.10967	3.88438	1.00111	0.317041
chr1	10092546	10095119	2574	chr1	10531332	10536785	5454	440226	-2.11484	3.88709	1.00394	0.31636
chr1	10092546	10095119	2574	chr1	11622220	11625083	2864	1529819	-2.10967	3.88438	1.00111	0.317041
chr1	10249115	10250717	1603	chr1	10531332	10536785	5454	284142	2.57893	3.88376	1.80247	0.179414
chr1	10249115	10250717	1603	chr1	10999383	11001403	2021	750477	-2.11484	3.88709	1.00394	0.31636
chr1	10371508	10373186	1679	chr1	10457928	10460418	2491	86826	-2.11484	3.88709	1.00394	0.31636
chr1	10457928	10460418	2491	chr1	10531332	10536785	5454	74885	-0.0105104	4.40754	4.81688e-05	0.994462
chr1	10457928	10460418	2491	chr1	10999383	11001403	2021	541220	-2.10967	3.88438	1.00111	0.317041
chr1	10457928	10460418	2491	chr1	11739774	11742949	3176	1282188	-2.10967	3.88438	1.00111	0.317041
chr1	10457928	10460418	2491	chr1	11778623	11781024	2402	1320650	2.64212	3.90778	1.85425	0.17329
chr1	10457928	10460418	2491	chr1	12039811	12041997	2187	1581731	2.57893	3.88376	1.80247	0.179414
chr1	10489450	10491688	2239	chr1	10531332	10536785	5454	43489	-1.56279	4.51786	1.39285	0.237925
chr1	10531332	10536785	5454	chr1	10752673	10753939	1267	219247	-2.11484	3.88709	1.00394	0.31636
chr1	10531332	10536785	5454	chr1	10999383	11001403	2021	466334	-2.93008	4.03414	1.97452	0.159969
chr1	10531332	10536785	5454	chr1	11071531	11074085	2555	538749	-2.93507	4.03679	1.97986	0.159405
chr1	10531332	10536785	5454	chr1	11158677	11160770	2094	625665	-2.11484	3.88709	1.00394	0.31636
chr1	10531332	10536785	5454	chr1	11321479	11323492	2014	788427	2.57893	3.88376	1.80247	0.179414
chr1	10531332	10536785	5454	chr1	11332475	11335207	2733	799782	-2.11484	3.88709	1.00394	0.31636
chr1	10531332	10536785	5454	chr1	11778623	11781024	2402	1245765	-2.10967	3.88438	1.00111	0.317041
chr1	10531332	10536785	5454	chr1	11873747	11877050	3304	1341340	-2.10967	3.88438	1.00111	0.317041
chr1	10531332	10536785	5454	chr1	11973312	11976532	3221	1440863	-2.11484	3.88709	1.00394	0.31636
chr1	10531332	10536785	5454	chr1	12078923	12080627	1705	1545716	-2.10967	3.88438	1.00111	0.317041
chr1	10531332	10536785	5454	chr1	12404142	12406790	2649	1871407	-2.11484	3.88709	1.00394	0.31636
chr1	10726596	10728285	1690	chr1	10999383	11001403	2021	272952	-2.11484	3.88709	1.00394	0.31636
chr1	10752673	10753939	1267	chr1	11063109	11064335	1227	310416	2.57893	3.88376	1.80247	0.179414
chr1	10752673	10753939	1267	chr1	11708882	11712713	3832	957491	-2.10967	3.88438	1.00111	0.317041
chr1	10999383	11001403	2021	chr1	11071531	11074085	2555	72415	-2.93008	4.03414	1.97452	0.159969
chr1	10999383	11001403	2021	chr1	11158677	11160770	2094	159330	2.57893	3.88376	1.80247	0.179414
chr1	10999383	11001403	2021	chr1	11286000	11289944	3945	287579	-2.11484	3.88709	1.00394	0.31636
chr1	10999383	11001403	2021	chr1	11778623	11781024	2402	779430	2.57893	3.88376	1.80247	0.179414
chr1	10999383	11001403	2021	chr1	11873747	11877050	3304	875005	-2.10967	3.88438	1.00111	0.317041
chr1	10999383	11001403	2021	chr1	11967064	11970949	3886	968613	-2.10967	3.88438	1.00111	0.317041
chr1	11063109	11064335	1227	chr1	11071531	11074085	2555	9086	0.469252	4.03353	0.0789089	0.778781
chr1	11063109	11064335	1227	chr1	11286000	11289944	3945	224250	0.469252	4.03353	0.0789089	0.778781
chr1	11063109	11064335	1227	chr1	11465995	11469273	3279	403912	-2.11484	3.88709	1.00394	0.31636
chr1	11063109	11064335	1227	chr1	12078923	12080627	1705	1016053	-2.11484	3.88709	1.00394	0.31636
chr1	11063109	11064335	1227	chr1	12097343	12102601	5259	1036250	2.57893	3.88376	1.80247	0.179414
chr1	11071531	11074085	2555	chr1	11098488	11100303	1816	26587	-2.11484	3.88709	1.00394	0.31636
chr1	11071531	11074085	2555	chr1	11158677	11160770	2094	86915	-2.11484	3.88709	1.00394	0.31636
chr1	11071531	11074085	2555	chr1	11286000	11289944	3945	215164	-2.11484	3.88709	1.00394	0.31636
chr1	11071531	11074085	2555	chr1	11299737	11301430	1694	227775	-2.10967	3.88438	1.00111	0.317041
chr1	11071531	11074085	2555	chr1	11332475	11335207	2733	261033	2.57893	3.88376	1.80247	0.179414
chr1	11071531	11074085	2555	chr1	11354057	11356388	2332	282414	2.57893	3.88376	1.80247	0.179414
chr1	11071531	11074085	2555	chr1	11778623	11781024	2402	707015	-2.10967	3.88438	1.00111	0.317041
chr1	11071531	11074085	2555	chr1	11864280	11868388	4109	793526	2.57893	3.88376	1.80247	0.179414
chr1	11071531	11074085	2555	chr1	11967064	11970949	3886	896198	2.57893	3.88376	1.80247	0.179414
chr1	11071531	11074085	2555	chr1	11989110	11991342	2233	917418	2.64212	3.90778	1.85425	0.17329
chr1	11071531	11074085	2555	chr1	12078923	12080627	1705	1006967	-2.10967	3.88438	1.00111	0.317041
chr1	11098488	11100303	1816	chr1	11347496	11349253	1758	248979	-2.11484	3.88709	1.00394	0.31636
chr1	11098488	11100303	1816	chr1	11778623	11781024	2402	680428	-2.11484	3.88709	1.00394	0.31636
chr1	11105669	11107321	1653	chr1	11118393	11121293	2901	13348	2.57893	3.88376	1.80247	0.179414
chr1	11105669	11107321	1653	chr1	11158677	11160770	2094	53228	1.33324	4.16825	0.807817	0.368766
chr1	11105669	11107321	1653	chr1	11286000	11289944	3945	181477	2.57893	3.88376	1.80247	0.179414
chr1	11105669	11107321	1653	chr1	11332475	11335207	2733	227346	-2.11484	3.88709	1.00394	0.31636
chr1	11105669	11107321	1653	chr1	11368386	11369764	1379	262580	-2.11484	3.88709	1.00394	0.31636
chr1	11105669	11107321	1653	chr1	11538069	11540535	2467	432807	-2.11484	3.88709	1.00394	0.31636
chr1	11105669	11107321	1653	chr1	11622220	11625083	2864	517156	2.64212	3.90778	1.85425	0.17329
chr1	11105669	11107321	1653	chr1	11967064	11970949	3886	862511	2.57893	3.88376	1.80247	0.179414
chr1	11105669	11107321	1653	chr1	12039811	12041997	2187	934409	-2.11484	3.88709	1.00394	0.31636
chr1	11118393	11121293	2901	chr1	11158677	11160770	2094	39880	-2.94007	4.03946	1.98523	0.15884
chr1	11118393	11121293	2901	chr1	11260864	11262100	1237	141639	-2.10967	3.88438	1.00111	0.317041
chr1	11118393	11121293	2901	chr1	11286000	11289944	3945	168129	-2.94007	4.03946	1.98523	0.15884
chr1	11118393	11121293	2901	chr1	11299737	11301430	1694	180740	-2.93507	4.03679	1.97986	0.159405
chr1	11118393	11121293	2901	chr1	11332475	11335207	2733	213998	3.50433	4.05674	3.62885	0.0567861
chr1	11118393	11121293	2901	chr1	11465995	11469273	3279	347791	-2.10967	3.88438	1.00111	0.317041
chr1	11118393	11121293	2901	chr1	11778623	11781024	2402	659980	-2.11484	3.88709	1.00394	0.31636
chr1	11118393	11121293	2901	chr1	11959085	11962160	3076	840779	2.57893	3.88376	1.80247	0.179414
chr1	11118393	11121293	2901	chr1	12097343	12102601	5259	980129	-2.10967	3.88438	1.00111	0.317041
chr1	11158677	11160770	2094	chr1	11260864	11262100	1237	101758	2.57893	3.88376	1.80247	0.179414
chr1	11158677	11160770	2094	chr1	11286000	11289944	3945	128248	-0.884191	4.29992	0.37729	0.539057
chr1	11158677	11160770	2094	chr1	11321479	11323492	2014	162762	-3.45827	4.17466	2.93719	0.0865614
chr1	11158677	11160770	2094	chr1	11465995	11469273	3279	307910	-2.11484	3.88709	1.00394	0.31636
chr1	11158677	11160770	2094	chr1	11708882	11712713	3832	551074	2.57893	3.88376	1.80247	0.179414
chr1	11158677	11160770	2094	chr1	11778623	11781024	2402	620100	2.57893	3.88376	1.80247	0.179414
chr1	11158677	11160770	2094	chr1	11873747	11877050	3304	715675	-2.11484	3.88709	1.00394	0.31636
chr1	11158677	11160770	2094	chr1	11984385	11986896	2512	825917	-2.11484	3.88709	1.00394	0.31636
chr1	11158677	11160770	2094	chr1	12078923	12080627	1705	920051	-2.10967	3.88438	1.00111	0.317041
chr1	11158677	11160770	2094	chr1	12220724	12223575	2852	1062426	2.57893	3.88376	1.80247	0.179414
chr1	11260864	11262100	1237	chr1	11286000	11289944	3945	26490	0.464089	4.03619	0.0775205	0.780686
chr1	11260864	11262100	1237	chr1	11321479	11323492	2014	61003	-2.11484	3.88709	1.00394	0.31636
chr1	11260864	11262100	1237	chr1	12209148	12214283	5136	950233	-2.10967	3.88438	1.00111	0.317041
chr1	11260864	11262100	1237	chr1	12570966	12572444	1479	1310223	-2.10967	3.88438	1.00111	0.317041
chr1	11286000	11289944	3945	chr1	11299737	11301430	1694	12611	-0.0288613	4.86814	0.000780528	0.977712
chr1	11286000	11289944	3945	chr1	11321479	11323492	2014	34513	-1.25412	4.40811	0.834135	0.36108
chr1	11286000	11289944	3945	chr1	11332475	11335207	2733	45869	0.574257	4.31509	0.180164	0.671232
chr1	11286000	11289944	3945	chr1	11347496	11349253	1758	60402	-2.11484	3.88709	1.00394	0.31636
chr1	11286000	11289944	3945	chr1	11354057	11356388	2332	67250	0.514925	4.51426	0.200077	0.654658
chr1	11286000	11289944	3945	chr1	11465995	11469273	3279	179662	-2.93507	4.03679	1.97986	0.159405
chr1	11286000	11289944	3945	chr1	11538069	11540535	2467	251330	-2.10967	3.88438	1.00111	0.317041
chr1	11286000	11289944	3945	chr1	11561682	11563135	1454	274436	-2.10967	3.88438	1.00111	0.317041
chr1	11286000	11289944	3945	chr1	11622220	11625083	2864	335679	2.57893	3.88376	1.80247	0.179414
chr1	11286000	11289944	3945	chr1	11708882	11712713	3832	422825	2.57893	3.88376	1.80247	0.179414
chr1	11286000	11289944	3945	chr1	11739774	11742949	3176	453389	2.57893	3.88376	1.80247	0.179414
chr1	11286000	11289944	3945	chr1	11796467	11798522	2056	509522	-2.11484	3.88709	1.00394	0.31636
chr1	11286000	11289944	3945	chr1	11864280	11868388	4109	578362	-3.45827	4.17466	2.93719	0.0865614
chr1	11286000	11289944	3945	chr1	11873747	11877050	3304	587426	-2.11484	3.88709	1.00394	0.31636
chr1	11286000	11289944	3945	chr1	11967064	11970949	3886	681034	-2.10967	3.88438	1.00111	0.317041
chr1	11286000	11289944	3945	chr1	11989110	11991342	2233	702254	-2.10967	3.88438	1.00111	0.317041
chr1	11286000	11289944	3945	chr1	11993698	11995318	1621	706536	-2.10967	3.88438	1.00111	0.317041
chr1	11286000	11289944	3945	chr1	12078923	12080627	1705	791803	-2.11484	3.88709	1.00394	0.31636
chr1	11286000	11289944	3945	chr1	12097343	12102601	5259	812000	-2.93507	4.03679	1.97986	0.159405
chr1	11286000	11289944	3945	chr1	12209148	12214283	5136	923743	-3.45343	4.17205	2.92956	0.0869714
chr1	11299737	11301430	1694	chr1	11332475	11335207	2733	33257	-2.10967	3.88438	1.00111	0.317041
chr1	11299737	11301430	1694	chr1	11465995	11469273	3279	167050	-2.11484	3.88709	1.00394	0.31636
chr1	11299737	11301430	1694	chr1	11561682	11563135	1454	261825	-2.10967	3.88438	1.00111	0.317041
chr1	11299737	11301430	1694	chr1	11739774	11742949	3176	440778	2.57893	3.88376	1.80247	0.179414
chr1	11299737	11301430	1694	chr1	11967064	11970949	3886	668423	-2.93507	4.03679	1.97986	0.159405
chr1	11299737	11301430	1694	chr1	12097343	12102601	5259	799388	-2.94007	4.03946	1.98523	0.15884
chr1	11321479	11323492	2014	chr1	11332475	11335207	2733	11355	-1.25412	4.40811	0.834135	0.36108
chr1	11321479	11323492	2014	chr1	11347496	11349253	1758	25889	-2.10967	3.88438	1.00111	0.317041
chr1	11321479	11323492	2014	chr1	11368386	11369764	1379	46589	-2.93008	4.03414	1.97452	0.159969
chr1	11321479	11323492	2014	chr1	11465995	11469273	3279	145148	2.57893	3.88376	1.80247	0.179414
chr1	11321479	11323492	2014	chr1	11778623	11781024	2402	457338	-2.11484	3.88709	1.00394	0.31636
chr1	11321479	11323492	2014	chr1	11796467	11798522	2056	475009	-2.93507	4.03679	1.97986	0.159405
chr1	11321479	11323492	2014	chr1	11873747	11877050	3304	552913	2.57893	3.88376	1.80247	0.179414
chr1	11321479	11323492	2014	chr1	11900492	11902625	2134	579073	-2.10967	3.88438	1.00111	0.317041
chr1	11321479	11323492	2014	chr1	11973312	11976532	3221	652436	-2.11484	3.88709	1.00394	0.31636
chr1	11332475	11335207	2733	chr1	11347496	11349253	1758	14533	-2.11484	3.88709	1.00394	0.31636
chr1	11332475	11335207	2733	chr1	11708882	11712713	3832	376956	-2.11484	3.88709	1.00394	0.31636
chr1	11332475	11335207	2733	chr1	11739774	11742949	3176	407520	3.44292	4.03292	3.53119	0.0602246
chr1	11332475	11335207	2733	chr1	11778623	11781024	2402	445982	2.57893	3.88376	1.80247	0.179414
chr1	11332475	11335207	2733	chr1	11967064	11970949	3886	635165	-2.11484	3.88709	1.00394	0.31636
chr1	11332475	11335207	2733	chr1	11993698	11995318	1621	660667	2.64212	3.90778	1.85425	0.17329
chr1	11347496	11349253	1758	chr1	11622220	11625083	2864	275277	-2.11484	3.88709	1.00394	0.31636
chr1	11347496	11349253	1758	chr1	11739774	11742949	3176	392987	-2.11484	3.88709	1.00394	0.31636
chr1	11354057	11356388	2332	chr1	11708882	11712713	3832	355575	-2.10967	3.88438	1.00111	0.317041
chr1	11368386	11369764	1379	chr1	11521238	11524058	2821	153573	-2.93008	4.03414	1.97452	0.159969
chr1	11368386	11369764	1379	chr1	11538069	11540535	2467	170227	-2.10967	3.88438	1.00111	0.317041
chr1	11368386	11369764	1379	chr1	11739774	11742949	3176	372286	2.64212	3.90778	1.85425	0.17329
chr1	11465995	11469273	3279	chr1	11521238	11524058	2821	55014	-2.93507	4.03679	1.97986	0.159405
chr1	11465995	11469273	3279	chr1	11538069	11540535	2467	71668	2.57893	3.88376	1.80247	0.179414
chr1	11465995	11469273	3279	chr1	11708882	11712713	3832	243163	-3.4486	4.16944	2.92196	0.0873815
chr1	11465995	11469273	3279	chr1	11739774	11742949	3176	273727	-2.11484	3.88709	1.00394	0.31636
chr1	11465995	11469273	3279	chr1	11778623	11781024	2402	312189	-2.10967	3.88438	1.00111	0.317041
chr1	11465995	11469273	3279	chr1	11864280	11868388	4109	398700	-2.11484	3.88709	1.00394	0.31636
chr1	11465995	11469273	3279	chr1	11900492	11902625	2134	433924	-2.10967	3.88438	1.00111	0.317041
chr1	11465995	11469273	3279	chr1	11959085	11962160	3076	492988	-2.10967	3.88438	1.00111	0.317041
chr1	11465995	11469273	3279	chr1	11967064	11970949	3886	501372	-2.11484	3.88709	1.00394	0.31636
chr1	11465995	11469273	3279	chr1	11993698	11995318	1621	526874	-2.11484	3.88709	1.00394	0.31636
chr1	11465995	11469273	3279	chr1	12078923	12080627	1705	612141	2.57893	3.88376	1.80247	0.179414
chr1	11465995	11469273	3279	chr1	12097343	12102601	5259	632338	0.469252	4.03353	0.0789089	0.778781
chr1	11465995	11469273	3279	chr1	12186026	12188424	2399	719591	-2.10967	3.88438	1.00111	0.317041
chr1	11465995	11469273	3279	chr1	12209148	12214283	5136	744081	-2.11484	3.88709	1.00394	0.31636
chr1	11521238	11524058	2821	chr1	11538069	11540535	2467	16654	-2.11484	3.88709	1.00394	0.31636
chr1	11521238	11524058	2821	chr1	11561682	11563135	1454	39760	0.464089	4.03619	0.0775205	0.780686
chr1	11521238	11524058	2821	chr1	11873747	11877050	3304	352750	-2.11484	3.88709	1.00394	0.31636
chr1	11521238	11524058	2821	chr1	11959085	11962160	3076	437974	2.57893	3.88376	1.80247	0.179414
chr1	11538069	11540535	2467	chr1	11561682	11563135	1454	23106	-2.10967	3.88438	1.00111	0.317041
chr1	11538069	11540535	2467	chr1	11622220	11625083	2864	84349	2.57893	3.88376	1.80247	0.179414
chr1	11538069	11540535	2467	chr1	11778623	11781024	2402	240521	-3.45343	4.17205	2.92956	0.0869714
chr1	11538069	11540535	2467	chr1	11864280	11868388	4109	327032	2.57893	3.88376	1.80247	0.179414
chr1	11538069	11540535	2467	chr1	11873747	11877050	3304	336096	-2.11484	3.88709	1.00394	0.31636
chr1	11561682	11563135	1454	chr1	11739774	11742949	3176	178953	-2.10967	3.88438	1.00111	0.317041
chr1	11622220	11625083	2864	chr1	11739774	11742949	3176	117710	2.57893	3.88376	1.80247	0.179414
chr1	11622220	11625083	2864	chr1	11984385	11986896	2512	361989	2.57893	3.88376	1.80247	0.179414
chr1	11622220	11625083	2864	chr1	11993698	11995318	1621	370856	-2.11484	3.88709	1.00394	0.31636
chr1	11622220	11625083	2864	chr1	12202835	12204613	1779	580072	-2.11484	3.88709	1.00394	0.31636
chr1	11622220	11625083	2864	chr1	12209148	12214283	5136	588064	-2.11484	3.88709	1.00394	0.31636
chr1	11708882	11712713	3832	chr1	11739774	11742949	3176	30564	0.469252	4.03353	0.0789089	0.778781
chr1	11708882	11712713	3832	chr1	11873747	11877050	3304	164601	2.57893	3.88376	1.80247	0.179414
chr1	11708882	11712713	3832	chr1	11959085	11962160	3076	249825	-2.10967	3.88438	1.00111	0.317041
chr1	11708882	11712713	3832	chr1	11967064	11970949	3886	258209	-2.11484	3.88709	1.00394	0.31636
chr1	11708882	11712713	3832	chr1	11973312	11976532	3221	264124	-2.10967	3.88438	1.00111	0.317041
chr1	11708882	11712713	3832	chr1	12209148	12214283	5136	500918	-2.93008	4.03414	1.97452	0.159969
chr1	11739774	11742949	3176	chr1	11778623	11781024	2402	38462	-0.333402	4.53796	0.0785321	0.779297
chr1	11739774	11742949	3176	chr1	11796467	11798522	2056	56133	0.52459	4.50933	0.20708	0.649066
chr1	11739774	11742949	3176	chr1	11864280	11868388	4109	124972	-2.93507	4.03679	1.97986	0.159405
chr1	11739774	11742949	3176	chr1	11873747	11877050	3304	134037	-0.35115	4.16885	0.0525494	0.818685
chr1	11739774	11742949	3176	chr1	11900492	11902625	2134	160197	-2.10967	3.88438	1.00111	0.317041
chr1	11739774	11742949	3176	chr1	11959085	11962160	3076	219261	1.85835	4.29362	1.82579	0.176626
chr1	11739774	11742949	3176	chr1	11967064	11970949	3886	227645	-2.11484	3.88709	1.00394	0.31636
chr1	11739774	11742949	3176	chr1	11973312	11976532	3221	233560	2.57893	3.88376	1.80247	0.179414
chr1	11739774	11742949	3176	chr1	11993698	11995318	1621	253146	-2.11484	3.88709	1.00394	0.31636
chr1	11739774	11742949	3176	chr1	12039811	12041997	2187	299542	-2.10967	3.88438	1.00111	0.317041
chr1	11739774	11742949	3176	chr1	12078923	12080627	1705	338413	0.464089	4.03619	0.0775205	0.780686
chr1	11739774	11742949	3176	chr1	12209148	12214283	5136	470354	-0.356139	4.17145	0.0538612	0.816476
chr1	11778623	11781024	2402	chr1	11796467	11798522	2056	17671	-0.0202014	4.41257	0.000196752	0.988809
chr1	11778623	11781024	2402	chr1	11959085	11962160	3076	180799	-2.11484	3.88709	1.00394	0.31636
chr1	11778623	11781024	2402	chr1	11967064	11970949	3886	189183	0.464089	4.03619	0.0775205	0.780686
chr1	11778623	11781024	2402	chr1	12111553	12114445	2893	333175	-2.10967	3.88438	1.00111	0.317041
chr1	11778623	11781024	2402	chr1	12186026	12188424	2399	407401	0.464089	4.03619	0.0775205	0.780686
chr1	11778623	11781024	2402	chr1	12209148	12214283	5136	431892	-2.94007	4.03946	1.98523	0.15884
chr1	11796467	11798522	2056	chr1	11864280	11868388	4109	68839	-1.5537	4.51291	1.37696	0.24062
chr1	11796467	11798522	2056	chr1	11873747	11877050	3304	77904	0.469252	4.03353	0.0789089	0.778781
chr1	11796467	11798522	2056	chr1	11959085	11962160	3076	163128	-2.93008	4.03414	1.97452	0.159969
chr1	11796467	11798522	2056	chr1	11967064	11970949	3886	171512	0.469252	4.03353	0.0789089	0.778781
chr1	11796467	11798522	2056	chr1	11973312	11976532	3221	177427	3.50433	4.05674	3.62885	0.0567861
chr1	11796467	11798522	2056	chr1	11989110	11991342	2233	192731	-2.10967	3.88438	1.00111	0.317041
chr1	11796467	11798522	2056	chr1	12097343	12102601	5259	302477	-2.94007	4.03946	1.98523	0.15884
chr1	11796467	11798522	2056	chr1	12209148	12214283	5136	414221	-2.10967	3.88438	1.00111	0.317041
chr1	11843977	11845749	1773	chr1	11864280	11868388	4109	21471	-2.93507	4.03679	1.97986	0.159405
chr1	11843977	11845749	1773	chr1	11873747	11877050	3304	30535	-1.25881	4.41063	0.840087	0.359372
chr1	11843977	11845749	1773	chr1	11973312	11976532	3221	130059	-2.11484	3.88709	1.00394	0.31636
chr1	11843977	11845749	1773	chr1	12078923	12080627	1705	234912	0.464089	4.03619	0.0775205	0.780686
chr1	11864280	11868388	4109	chr1	11873747	11877050	3304	9064	0.0929582	5.78444	0.0183547	0.892233
chr1	11864280	11868388	4109	chr1	11900492	11902625	2134	35224	-0.356139	4.17145	0.0538612	0.816476
chr1	11864280	11868388	4109	chr1	11959085	11962160	3076	94288	0.507851	4.29421	0.144875	0.703482
chr1	11864280	11868388	4109	chr1	11967064	11970949	3886	102672	-3.45343	4.17205	2.92956	0.0869714
chr1	11864280	11868388	4109	chr1	11973312	11976532	3221	108588	-0.689706	4.60982	0.355925	0.550778
chr1	11864280	11868388	4109	chr1	11984385	11986896	2512	119306	2.57893	3.88376	1.80247	0.179414
chr1	11864280	11868388	4109	chr1	11989110	11991342	2233	123892	-2.10967	3.88438	1.00111	0.317041
chr1	11864280	11868388	4109	chr1	12039811	12041997	2187	174570	-2.93507	4.03679	1.97986	0.159405
chr1	11864280	11868388	4109	chr1	12078923	12080627	1705	213441	-2.10967	3.88438	1.00111	0.317041
chr1	11864280	11868388	4109	chr1	12209148	12214283	5136	345381	-0.869674	4.29223	0.365995	0.545196
chr1	11873747	11877050	3304	chr1	11900492	11902625	2134	26160	-1.26351	4.41315	0.846077	0.357665
chr1	11873747	11877050	3304	chr1	11959085	11962160	3076	85224	0.0505377	5.02025	0.00337795	0.953653
chr1	11873747	11877050	3304	chr1	11967064	11970949	3886	93608	-0.694248	4.61225	0.360433	0.548266
chr1	11873747	11877050	3304	chr1	11973312	11976532	3221	99523	2.24074	4.4064	2.96059	0.085317
chr1	11873747	11877050	3304	chr1	11984385	11986896	2512	110242	0.469252	4.03353	0.0789089	0.778781
chr1	11873747	11877050	3304	chr1	11989110	11991342	2233	114827	-2.93008	4.03414	1.97452	0.159969
chr1	11873747	11877050	3304	chr1	11993698	11995318	1621	119109	0.464089	4.03619	0.0775205	0.780686
chr1	11873747	11877050	3304	chr1	12078923	12080627	1705	204376	-2.10967	3.88438	1.00111	0.317041
chr1	11873747	11877050	3304	chr1	12097343	12102601	5259	224573	0.135455	4.6117	0.0155733	0.900687
chr1	11873747	11877050	3304	chr1	12111553	12114445	2893	237600	-2.10967	3.88438	1.00111	0.317041
chr1	11873747	11877050	3304	chr1	12209148	12214283	5136	336317	-0.356139	4.17145	0.0538612	0.816476
chr1	11900492	11902625	2134	chr1	11959085	11962160	3076	59064	1.32808	4.17086	0.802402	0.370376
chr1	11900492	11902625	2134	chr1	11967064	11970949	3886	67448	0.51284	4.29165	0.147421	0.701013
chr1	11900492	11902625	2134	chr1	11973312	11976532	3221	73363	-0.0105104	4.40754	4.81688e-05	0.994462
chr1	11900492	11902625	2134	chr1	11984385	11986896	2512	84082	-2.93008	4.03414	1.97452	0.159969
chr1	11900492	11902625	2134	chr1	11993698	11995318	1621	92949	2.57893	3.88376	1.80247	0.179414
chr1	11900492	11902625	2134	chr1	12078923	12080627	1705	178216	0.469252	4.03353	0.0789089	0.778781
chr1	11900492	11902625	2134	chr1	12209148	12214283	5136	310157	2.57893	3.88376	1.80247	0.179414
chr1	11959085	11962160	3076	chr1	11967064	11970949	3886	8384	-0.125795	5.63486	0.0294669	0.863705
chr1	11959085	11962160	3076	chr1	11973312	11976532	3221	14299	0.712352	5.08771	0.678815	0.409995
chr1	11959085	11962160	3076	chr1	11984385	11986896	2512	25018	2.57893	3.88376	1.80247	0.179414
chr1	11959085	11962160	3076	chr1	11989110	11991342	2233	29603	-0.356139	4.17145	0.0538612	0.816476
chr1	11959085	11962160	3076	chr1	11993698	11995318	1621	33885	0.527287	4.06005	0.0951824	0.757689
chr1	11959085	11962160	3076	chr1	12039811	12041997	2187	80281	-2.93507	4.03679	1.97986	0.159405
chr1	11959085	11962160	3076	chr1	12078923	12080627	1705	119152	0.218417	4.78766	0.0485238	0.825652
chr1	11959085	11962160	3076	chr1	12097343	12102601	5259	139349	0.576088	4.72498	0.305638	0.58037
chr1	11959085	11962160	3076	chr1	12111553	12114445	2893	152376	-2.93507	4.03679	1.97986	0.159405
chr1	11959085	11962160	3076	chr1	12202835	12204613	1779	243101	-0.356139	4.17145	0.0538612	0.816476
chr1	11959085	11962160	3076	chr1	12209148	12214283	5136	251093	2.57893	3.88376	1.80247	0.179414
chr1	11959085	11962160	3076	chr1	12289647	12291821	2175	330111	-2.11484	3.88709	1.00394	0.31636
chr1	11959085	11962160	3076	chr1	12598768	12600833	2066	639178	2.57893	3.88376	1.80247	0.179414
chr1	11967064	11970949	3886	chr1	11973312	11976532	3221	5915	-0.343896	6.39991	0.329149	0.56616
chr1	11967064	11970949	3886	chr1	11984385	11986896	2512	16634	-0.95037	4.70807	0.718106	0.396766
chr1	11967064	11970949	3886	chr1	11989110	11991342	2233	21219	1.01097	4.65982	0.847628	0.357224
chr1	11967064	11970949	3886	chr1	11993698	11995318	1621	25501	0.927207	4.835	0.86217	0.353132
chr1	11967064	11970949	3886	chr1	12039811	12041997	2187	71897	2.57893	3.88376	1.80247	0.179414
chr1	11967064	11970949	3886	chr1	12078923	12080627	1705	110768	-0.292941	4.19512	0.0385064	0.84443
chr1	11967064	11970949	3886	chr1	12097343	12102601	5259	130965	0.514925	4.51426	0.200077	0.654658
chr1	11967064	11970949	3886	chr1	12186026	12188424	2399	218218	2.57893	3.88376	1.80247	0.179414
chr1	11967064	11970949	3886	chr1	12202835	12204613	1779	234717	3.44292	4.03292	3.53119	0.0602246
chr1	11967064	11970949	3886	chr1	12209148	12214283	5136	242709	-3.4486	4.16944	2.92196	0.0873815
chr1	11967064	11970949	3886	chr1	12268953	12270536	1584	300738	-2.93008	4.03414	1.97452	0.159969
chr1	11967064	11970949	3886	chr1	12289647	12291821	2175	321727	2.57893	3.88376	1.80247	0.179414
chr1	11973312	11976532	3221	chr1	11984385	11986896	2512	10718	-0.945944	4.70568	0.711598	0.398914
chr1	11973312	11976532	3221	chr1	11989110	11991342	2233	15304	-0.415669	4.79054	0.161592	0.687695
chr1	11973312	11976532	3221	chr1	11993698	11995318	1621	19586	-2.93507	4.03679	1.97986	0.159405
chr1	11973312	11976532	3221	chr1	12039811	12041997	2187	65982	-0.356139	4.17145	0.0538612	0.816476
chr1	11973312	11976532	3221	chr1	12078923	12080627	1705	104853	1.42052	4.51123	1.48316	0.223281
chr1	11973312	11976532	3221	chr1	12097343	12102601	5259	125050	0.213864	4.79001	0.0466303	0.829034
chr1	11973312	11976532	3221	chr1	12111553	12114445	2893	138077	2.57893	3.88376	1.80247	0.179414
chr1	11973312	11976532	3221	chr1	12186026	12188424	2399	212303	2.64212	3.90778	1.85425	0.17329
chr1	11973312	11976532	3221	chr1	12209148	12214283	5136	236793	0.502848	4.29677	0.142344	0.705962
chr1	11973312	11976532	3221	chr1	12252208	12254278	2071	278321	-2.93008	4.03414	1.97452	0.159969
chr1	11973312	11976532	3221	chr1	12404142	12406790	2649	430544	-2.10967	3.88438	1.00111	0.317041
chr1	11984385	11986896	2512	chr1	11993698	11995318	1621	8867	-0.35115	4.16885	0.0525494	0.818685
chr1	11984385	11986896	2512	chr1	12039811	12041997	2187	55263	2.64212	3.90778	1.85425	0.17329
chr1	11984385	11986896	2512	chr1	12078923	12080627	1705	94134	-2.10967	3.88438	1.00111	0.317041
chr1	11984385	11986896	2512	chr1	12186026	12188424	2399	201584	-2.10967	3.88438	1.00111	0.317041
chr1	11984385	11986896	2512	chr1	12209148	12214283	5136	226075	0.469252	4.03353	0.0789089	0.778781
chr1	11989110	11991342	2233	chr1	12078923	12080627	1705	89549	-4.14628	4.41624	4.79107	0.0286076
chr1	11989110	11991342	2233	chr1	12097343	12102601	5259	109746	-0.0202014	4.41257	0.000196752	0.988809
chr1	11989110	11991342	2233	chr1	12220724	12223575	2852	231923	-2.11484	3.88709	1.00394	0.31636
chr1	11993698	11995318	1621	chr1	12078923	12080627	1705	85267	2.57893	3.88376	1.80247	0.179414
chr1	11993698	11995318	1621	chr1	12097343	12102601	5259	105464	0.469252	4.03353	0.0789089	0.778781
chr1	11993698	11995318	1621	chr1	12209148	12214283	5136	217207	-2.10967	3.88438	1.00111	0.317041
chr1	12039811	12041997	2187	chr1	12078923	12080627	1705	38871	-0.356139	4.17145	0.0538612	0.816476
chr1	12039811	12041997	2187	chr1	12097343	12102601	5259	59068	3.97319	4.16766	5.19251	0.0226845
chr1	12039811	12041997	2187	chr1	12209148	12214283	5136	170811	2.57893	3.88376	1.80247	0.179414
chr1	12039811	12041997	2187	chr1	12268953	12270536	1584	228840	-2.10967	3.88438	1.00111	0.317041
chr1	12078923	12080627	1705	chr1	12097343	12102601	5259	20197	-0.228718	5.68275	0.100451	0.751289
chr1	12078923	12080627	1705	chr1	12111553	12114445	2893	33224	1.32808	4.17086	0.802402	0.370376
chr1	12078923	12080627	1705	chr1	12186026	12188424	2399	107450	-2.11484	3.88709	1.00394	0.31636
chr1	12078923	12080627	1705	chr1	12209148	12214283	5136	131940	0.579535	4.5349	0.248538	0.618107
chr1	12078923	12080627	1705	chr1	12220724	12223575	2852	142374	-2.11484	3.88709	1.00394	0.31636
chr1	12078923	12080627	1705	chr1	12404142	12406790	2649	325691	-2.11484	3.88709	1.00394	0.31636
chr1	12078923	12080627	1705	chr1	13991928	13995048	3121	1913713	-2.11484	3.88709	1.00394	0.31636
chr1	12078923	12080627	1705	chr1	14054076	14062507	8432	1978516	-0.356139	4.17145	0.0538612	0.816476
chr1	12097343	12102601	5259	chr1	12111553	12114445	2893	13027	-1.79498	5.09678	3.12293	0.077198
chr1	12097343	12102601	5259	chr1	12186026	12188424	2399	87253	-2.10967	3.88438	1.00111	0.317041
chr1	12097343	12102601	5259	chr1	12202835	12204613	1779	103752	-0.8745	4.29479	0.369729	0.543152
chr1	12097343	12102601	5259	chr1	12209148	12214283	5136	111743	-1.30869	5.44471	2.41752	0.119985
chr1	12097343	12102601	5259	chr1	12252208	12254278	2071	153271	-2.11484	3.88709	1.00394	0.31636
chr1	12097343	12102601	5259	chr1	12268953	12270536	1584	169772	-3.83305	4.29537	3.85462	0.0496092
chr1	12097343	12102601	5259	chr1	12289647	12291821	2175	190762	-0.361142	4.17406	0.0551936	0.814261
chr1	12097343	12102601	5259	chr1	12404142	12406790	2649	305494	-2.10967	3.88438	1.00111	0.317041
chr1	12097343	12102601	5259	chr1	12598768	12600833	2066	499828	2.57893	3.88376	1.80247	0.179414
chr1	12097343	12102601	5259	chr1	13991928	13995048	3121	1893516	-2.10967	3.88438	1.00111	0.317041
chr1	12097343	12102601	5259	chr1	14026463	14031622	5160	1929070	-0.361142	4.17406	0.0551936	0.814261
chr1	12097343	12102601	5259	chr1	14054076	14062507	8432	1958319	0.464089	4.03619	0.0775205	0.780686
chr1	12111553	12114445	2893	chr1	12209148	12214283	5136	98716	2.57893	3.88376	1.80247	0.179414
chr1	12111553	12114445	2893	chr1	12268953	12270536	1584	156745	-2.10967	3.88438	1.00111	0.317041
chr1	12186026	12188424	2399	chr1	12202835	12204613	1779	16499	-0.35115	4.16885	0.0525494	0.818685
chr1	12186026	12188424	2399	chr1	12209148	12214283	5136	24490	-1.14783	4.78637	1.10324	0.293555
chr1	12186026	12188424	2399	chr1	12252208	12254278	2071	66018	-2.10967	3.88438	1.00111	0.317041
chr1	12186026	12188424	2399	chr1	12268953	12270536	1584	82519	-3.4486	4.16944	2.92196	0.0873815
chr1	12186026	12188424	2399	chr1	12404142	12406790	2649	218241	-2.11484	3.88709	1.00394	0.31636
chr1	12202835	12204613	1779	chr1	12209148	12214283	5136	7991	-0.372499	5.63148	0.256485	0.612546
chr1	12202835	12204613	1779	chr1	12220724	12223575	2852	18425	2.57893	3.88376	1.80247	0.179414
chr1	12202835	12204613	1779	chr1	12252208	12254278	2071	49519	-2.11484	3.88709	1.00394	0.31636
chr1	12202835	12204613	1779	chr1	14026463	14031622	5160	1825318	-2.10967	3.88438	1.00111	0.317041
chr1	12202835	12204613	1779	chr1	14054076	14062507	8432	1854567	-2.11484	3.88709	1.00394	0.31636
chr1	12209148	12214283	5136	chr1	12220724	12223575	2852	10434	-0.370893	5.5	0.231441	0.630458
chr1	12209148	12214283	5136	chr1	12236226	12237801	1576	25298	-1.5537	4.51291	1.37696	0.24062
chr1	12209148	12214283	5136	chr1	12252208	12254278	2071	41527	-0.8745	4.29479	0.369729	0.543152
chr1	12209148	12214283	5136	chr1	12268953	12270536	1584	58029	-0.991374	5.27617	1.29823	0.254537
chr1	12209148	12214283	5136	chr1	12404142	12406790	2649	193750	-1.25881	4.41063	0.840087	0.359372
chr1	12209148	12214283	5136	chr1	12570966	12572444	1479	359989	2.57893	3.88376	1.80247	0.179414
chr1	12209148	12214283	5136	chr1	14026463	14031622	5160	1817327	1.03813	4.40697	0.707525	0.400267
chr1	12209148	12214283	5136	chr1	14054076	14062507	8432	1846576	-0.879339	4.29735	0.373495	0.541106
chr1	12209148	12214283	5136	chr1	14074332	14078350	4019	1864625	2.57893	3.88376	1.80247	0.179414
chr1	12220724	12223575	2852	chr1	12236226	12237801	1576	14864	0.469252	4.03353	0.0789089	0.778781
chr1	12220724	12223575	2852	chr1	12268953	12270536	1584	47595	-2.93507	4.03679	1.97986	0.159405
chr1	12220724	12223575	2852	chr1	12289647	12291821	2175	68584	2.57893	3.88376	1.80247	0.179414
chr1	12220724	12223575	2852	chr1	14054076	14062507	8432	1836142	-2.10967	3.88438	1.00111	0.317041
chr1	12236226	12237801	1576	chr1	12268953	12270536	1584	32731	-2.10967	3.88438	1.00111	0.317041
chr1	12252208	12254278	2071	chr1	14054076	14062507	8432	1805048	-2.10967	3.88438	1.00111	0.317041
chr1	12268953	12270536	1584	chr1	12289647	12291821	2175	20989	1.33324	4.16825	0.807817	0.368766
chr1	12268953	12270536	1584	chr1	12570966	12572444	1479	301960	-2.10967	3.88438	1.00111	0.317041
chr1	12268953	12270536	1584	chr1	14026463	14031622	5160	1759298	-2.11484	3.88709	1.00394	0.31636
chr1	12289647	12291821	2175	chr1	12445464	12447332	1869	155664	2.57893	3.88376	1.80247	0.179414
chr1	12404142	12406790	2649	chr1	14074332	14078350	4019	1670875	-2.10967	3.88438	1.00111	0.317041
chr1	12445464	12447332	1869	chr1	14039206	14041008	1803	1593709	-2.10967	3.88438	1.00111	0.317041
chr1	12869004	12870653	1650	chr1	14026463	14031622	5160	1159214	-2.11484	3.88709	1.00394	0.31636
chr1	12869004	12870653	1650	chr1	14695665	14698255	2591	1827131	-2.10967	3.88438	1.00111	0.317041
chr1	13967998	13969858	1861	chr1	13991928	13995048	3121	24560	-0.0153495	4.41006	0.000109797	0.99164
chr1	13967998	13969858	1861	chr1	14026463	14031622	5160	60114	1.10289	4.42771	0.789275	0.37432
chr1	13967998	13969858	1861	chr1	14054076	14062507	8432	89363	1.32808	4.17086	0.802402	0.370376
chr1	13967998	13969858	1861	chr1	14074332	14078350	4019	107413	-2.11484	3.88709	1.00394	0.31636
chr1	13967998	13969858	1861	chr1	14155148	14156869	1722	187080	2.57893	3.88376	1.80247	0.179414
chr1	13991928	13995048	3121	chr1	14026463	14031622	5160	35554	-0.628857	6.2875	0.989873	0.319773
chr1	13991928	13995048	3121	chr1	14039206	14041008	1803	46619	0.52459	4.50933	0.20708	0.649066
chr1	13991928	13995048	3121	chr1	14054076	14062507	8432	64803	0.781416	5.6048	1.16986	0.27943
chr1	13991928	13995048	3121	chr1	14074332	14078350	4019	82853	-3.45827	4.17466	2.93719	0.0865614
chr1	13991928	13995048	3121	chr1	14137701	14139895	2195	145310	0.469252	4.03353	0.0789089	0.778781
chr1	13991928	13995048	3121	chr1	14155148	14156869	1722	162520	3.44292	4.03292	3.53119	0.0602246
chr1	13991928	13995048	3121	chr1	14645171	14649546	4376	653870	-2.11484	3.88709	1.00394	0.31636
chr1	13991928	13995048	3121	chr1	14695665	14698255	2591	703472	2.57893	3.88376	1.80247	0.179414
chr1	13991928	13995048	3121	chr1	15206078	15210142	4065	1214622	-2.10967	3.88438	1.00111	0.317041
chr1	13991928	13995048	3121	chr1	15726619	15728750	2132	1734196	2.57893	3.88376	1.80247	0.179414
chr1	14026463	14031622	5160	chr1	14039206	14041008	1803	11064	-0.567291	6.56838	0.929838	0.334905
chr1	14026463	14031622	5160	chr1	14054076	14062507	8432	29249	-0.396519	7.94924	0.726671	0.393964
chr1	14026463	14031622	5160	chr1	14074332	14078350	4019	47298	-0.55038	5.72031	0.581055	0.445899
chr1	14026463	14031622	5160	chr1	14137701	14139895	2195	109755	-1.25412	4.40811	0.834135	0.36108
chr1	14026463	14031622	5160	chr1	14155148	14156869	1722	126966	-2.11484	3.88709	1.00394	0.31636
chr1	14026463	14031622	5160	chr1	14264818	14266476	1659	236604	2.57893	3.88376	1.80247	0.179414
chr1	14026463	14031622	5160	chr1	14645171	14649546	4376	618316	-1.81436	4.61766	1.99399	0.157924
chr1	14026463	14031622	5160	chr1	14695665	14698255	2591	667917	-2.93008	4.03414	1.97452	0.159969
chr1	14026463	14031622	5160	chr1	14987084	14989491	2408	959245	-2.11484	3.88709	1.00394	0.31636
chr1	14026463	14031622	5160	chr1	15331214	15333503	2290	1303316	2.57893	3.88376	1.80247	0.179414
chr1	14026463	14031622	5160	chr1	15687065	15690305	3241	1659642	3.44292	4.03292	3.53119	0.0602246
chr1	14026463	14031622	5160	chr1	15726619	15728750	2132	1698642	-2.10967	3.88438	1.00111	0.317041
chr1	14026463	14031622	5160	chr1	15849744	15853967	4224	1822813	-0.356139	4.17145	0.0538612	0.816476
chr1	14026463	14031622	5160	chr1	15890114	15891681	1568	1861855	-2.10967	3.88438	1.00111	0.317041
chr1	14026463	14031622	5160	chr1	15897046	15900577	3532	1869769	0.507851	4.29421	0.144875	0.703482
chr1	14026463	14031622	5160	chr1	15942830	15945858	3029	1915301	-2.10967	3.88438	1.00111	0.317041
chr1	14039206	14041008	1803	chr1	14054076	14062507	8432	18184	-1.16663	5.92513	2.68843	0.101079
chr1	14039206	14041008	1803	chr1	14074332	14078350	4019	36234	0.469252	4.03353	0.0789089	0.778781
chr1	14039206	14041008	1803	chr1	14695665	14698255	2591	656853	0.469252	4.03353	0.0789089	0.778781
chr1	14039206	14041008	1803	chr1	15849744	15853967	4224	1811748	-2.11484	3.88709	1.00394	0.31636
chr1	14039206	14041008	1803	chr1	15897046	15900577	3532	1858704	2.57893	3.88376	1.80247	0.179414
chr1	14054076	14062507	8432	chr1	14074332	14078350	4019	18049	-0.464769	6.05636	0.496726	0.480942
chr1	14054076	14062507	8432	chr1	14137701	14139895	2195	80506	-0.177662	4.70992	0.0272532	0.868877
chr1	14054076	14062507	8432	chr1	14155148	14156869	1722	97717	-0.879339	4.29735	0.373495	0.541106
chr1	14054076	14062507	8432	chr1	14645171	14649546	4376	589067	-2.94007	4.03946	1.98523	0.15884
chr1	14054076	14062507	8432	chr1	14695665	14698255	2591	638668	-2.10967	3.88438	1.00111	0.317041
chr1	14054076	14062507	8432	chr1	15687065	15690305	3241	1630393	-3.46312	4.17727	2.94485	0.0861515
chr1	14054076	14062507	8432	chr1	15726619	15728750	2132	1669393	0.469252	4.03353	0.0789089	0.778781
chr1	14054076	14062507	8432	chr1	15735648	15737809	2162	1678437	-2.10967	3.88438	1.00111	0.317041
chr1	14054076	14062507	8432	chr1	16022391	16025281	2891	1965544	0.464089	4.03619	0.0775205	0.780686
chr1	14074332	14078350	4019	chr1	14155148	14156869	1722	79667	-2.10967	3.88438	1.00111	0.317041
chr1	14074332	14078350	4019	chr1	14645171	14649546	4376	571017	-2.10967	3.88438	1.00111	0.317041
chr1	14074332	14078350	4019	chr1	15735648	15737809	2162	1660387	-2.11484	3.88709	1.00394	0.31636
chr1	14074332	14078350	4019	chr1	15849744	15853967	4224	1775514	2.57893	3.88376	1.80247	0.179414
chr1	14137701	14139895	2195	chr1	14155148	14156869	1722	17210	-2.11484	3.88709	1.00394	0.31636
chr1	14155148	14156869	1722	chr1	14695665	14698255	2591	540951	2.57893	3.88376	1.80247	0.179414
chr1	14264818	14266476	1659	chr1	14695665	14698255	2591	431313	2.57893	3.88376	1.80247	0.179414
chr1	14409466	14410674	1209	chr1	14645171	14649546	4376	237288	-2.10967	3.88438	1.00111	0.317041
chr1	14409466	14410674	1209	chr1	16077101	16078710	1610	1667835	-2.10967	3.88438	1.00111	0.317041
chr1	14645171	14649546	4376	chr1	14660065	14661760	1696	13554	-3.83774	4.29794	3.86427	0.0493245
chr1	14645171	14649546	4376	chr1	14695665	14698255	2591	49601	-2.19531	4.7869	3.20909	0.0732301
chr1	14645171	14649546	4376	chr1	14716524	14719757	3234	70782	-2.10967	3.88438	1.00111	0.317041
chr1	14645171	14649546	4376	chr1	14987084	14989491	2408	340929	-2.93008	4.03414	1.97452	0.159969
chr1	14645171	14649546	4376	chr1	15687065	15690305	3241	1041326	-3.45827	4.17466	2.93719	0.0865614
chr1	14645171	14649546	4376	chr1	15841534	15843026	1493	1194921	-2.11484	3.88709	1.00394	0.31636
chr1	14645171	14649546	4376	chr1	15971325	15972957	1633	1324782	-2.11484	3.88709	1.00394	0.31636
chr1	14660065	14661760	1696	chr1	14695665	14698255	2591	36047	-2.10967	3.88438	1.00111	0.317041
chr1	14660065	14661760	1696	chr1	14987084	14989491	2408	327375	-2.10967	3.88438	1.00111	0.317041
chr1	14695665	14698255	2591	chr1	14716524	14719757	3234	21180	-2.11484	3.88709	1.00394	0.31636
chr1	14695665	14698255	2591	chr1	14987084	14989491	2408	291327	-2.10967	3.88438	1.00111	0.317041
chr1	14695665	14698255	2591	chr1	15687065	15690305	3241	991725	-2.11484	3.88709	1.00394	0.31636
chr1	14695665	14698255	2591	chr1	16300971	16303739	2769	1605395	-2.11484	3.88709	1.00394	0.31636
chr1	14987084	14989491	2408	chr1	15687065	15690305	3241	700397	-2.10967	3.88438	1.00111	0.317041
chr1	15206078	15210142	4065	chr1	15331214	15333503	2290	124248	0.469252	4.03353	0.0789089	0.778781
chr1	15206078	15210142	4065	chr1	15905376	15906937	1562	698046	-2.11484	3.88709	1.00394	0.31636
chr1	15206078	15210142	4065	chr1	16892095	16894510	2416	1685192	-2.11484	3.88709	1.00394	0.31636
chr1	15334816	15336779	1964	chr1	15890114	15891681	1568	555100	-2.10967	3.88438	1.00111	0.317041
chr1	15439953	15441780	1828	chr1	15726619	15728750	2132	286818	-2.94007	4.03946	1.98523	0.15884
chr1	15455500	15457103	1604	chr1	15849744	15853967	4224	395554	-2.10967	3.88438	1.00111	0.317041
chr1	15455500	15457103	1604	chr1	16077101	16078710	1610	621604	-2.10967	3.88438	1.00111	0.317041
chr1	15687065	15690305	3241	chr1	15726619	15728750	2132	38999	-1.81436	4.61766	1.99399	0.157924
chr1	15687065	15690305	3241	chr1	15735648	15737809	2162	48043	1.72408	4.60575	2.38347	0.122625
chr1	15687065	15690305	3241	chr1	15849744	15853967	4224	163170	-3.45343	4.17205	2.92956	0.0869714
chr1	15687065	15690305	3241	chr1	15890114	15891681	1568	202212	-2.11484	3.88709	1.00394	0.31636
chr1	15687065	15690305	3241	chr1	15905376	15906937	1562	217471	2.57893	3.88376	1.80247	0.179414
chr1	15687065	15690305	3241	chr1	15910342	15912494	2153	222733	2.57893	3.88376	1.80247	0.179414
chr1	15687065	15690305	3241	chr1	15942830	15945858	3029	255659	-2.10967	3.88438	1.00111	0.317041
chr1	15687065	15690305	3241	chr1	15971325	15972957	1633	283456	2.57893	3.88376	1.80247	0.179414
[truncated: 165,185 more rows]

## Sheet: EBNA2+ vs Uninfected
chromosome (left)	start (left)	end (left)	anchor_length (left)	chromosome (right)	start (right)	end (right)	anchor_length (right)	loopWidth	logFC	logCPM	LR	PValue
chr1	712255	716177	3923	chr1	761744	764405	2662	48858	-0.307176	4.13137	0.0400325	0.841417
chr1	712255	716177	3923	chr1	947693	951090	3398	235175	-2.09501	3.84509	0.973196	0.323884
chr1	712255	716177	3923	chr1	1061928	1065340	3413	349418	-2.09501	3.84509	0.973196	0.323884
chr1	712255	716177	3923	chr1	1078194	1081930	3737	365846	-2.09501	3.84509	0.973196	0.323884
chr1	712255	716177	3923	chr1	1259028	1262182	3155	546389	-2.09517	3.84518	0.973285	0.323862
chr1	712255	716177	3923	chr1	1341072	1344217	3146	628428	-2.09517	3.84518	0.973285	0.323862
chr1	712255	716177	3923	chr1	1405386	1409111	3726	693032	0.51335	3.99501	0.0945291	0.758496
chr1	712255	716177	3923	chr1	1608442	1611221	2780	895615	2.60836	3.84426	1.8518	0.173574
chr1	712255	716177	3923	chr1	1762950	1767893	4944	1051205	2.60836	3.84426	1.8518	0.173574
chr1	712255	716177	3923	chr1	1830551	1833838	3288	1117978	-2.09501	3.84509	0.973196	0.323884
chr1	712255	716177	3923	chr1	1868118	1870808	2691	1155247	-2.09501	3.84509	0.973196	0.323884
chr1	712255	716177	3923	chr1	2424097	2429120	5024	1712392	-2.09517	3.84518	0.973285	0.323862
chr1	761744	764405	2662	chr1	893040	896870	3831	131880	2.60836	3.84426	1.8518	0.173574
chr1	761744	764405	2662	chr1	1309279	1312529	3251	547829	-2.09501	3.84509	0.973196	0.323884
chr1	761744	764405	2662	chr1	2476096	2481428	5333	1715687	-2.09501	3.84509	0.973196	0.323884
chr1	893040	896870	3831	chr1	947693	951090	3398	54436	-2.91553	3.99592	1.92409	0.165407
chr1	893040	896870	3831	chr1	1070688	1076581	5894	178679	-0.307176	4.13137	0.0400325	0.841417
chr1	893040	896870	3831	chr1	1078194	1081930	3737	185107	-2.09517	3.84518	0.973285	0.323862
chr1	893040	896870	3831	chr1	1091969	1094657	2689	198358	2.60836	3.84426	1.8518	0.173574
chr1	893040	896870	3831	chr1	1165102	1167882	2781	271537	2.60836	3.84426	1.8518	0.173574
chr1	893040	896870	3831	chr1	1240233	1245867	5635	348095	0.51335	3.99501	0.0945291	0.758496
chr1	893040	896870	3831	chr1	1309279	1312529	3251	415949	-2.09517	3.84518	0.973285	0.323862
chr1	893040	896870	3831	chr1	1341072	1344217	3146	447689	2.60836	3.84426	1.8518	0.173574
chr1	947693	951090	3398	chr1	1017648	1019543	1896	69204	-2.09517	3.84518	0.973285	0.323862
chr1	947693	951090	3398	chr1	1070688	1076581	5894	124243	3.47568	3.9942	3.63313	0.0566402
chr1	947693	951090	3398	chr1	1078194	1081930	3737	130670	-0.307013	4.13128	0.0399955	0.841489
chr1	947693	951090	3398	chr1	1091969	1094657	2689	143921	2.60836	3.84426	1.8518	0.173574
chr1	947693	951090	3398	chr1	1112754	1114681	1928	164326	0.51335	3.99501	0.0945291	0.758496
chr1	947693	951090	3398	chr1	1165102	1167882	2781	217100	-2.91553	3.99592	1.92409	0.165407
chr1	947693	951090	3398	chr1	1207484	1210739	3256	259720	0.513182	3.9951	0.0944795	0.758558
chr1	947693	951090	3398	chr1	1240233	1245867	5635	293658	-0.307176	4.13137	0.0400325	0.841417
chr1	947693	951090	3398	chr1	1259028	1262182	3155	311213	-2.09501	3.84509	0.973196	0.323884
chr1	947693	951090	3398	chr1	1309279	1312529	3251	361512	-2.09501	3.84509	0.973196	0.323884
chr1	947693	951090	3398	chr1	1332499	1337197	4699	385456	-2.91553	3.99592	1.92409	0.165407
chr1	947693	951090	3398	chr1	1445583	1448736	3154	497768	-2.09517	3.84518	0.973285	0.323862
chr1	947693	951090	3398	chr1	1549906	1552004	2099	601563	2.60836	3.84426	1.8518	0.173574
chr1	947693	951090	3398	chr1	1708427	1715416	6990	762530	0.513182	3.9951	0.0944795	0.758558
chr1	947693	951090	3398	chr1	1762950	1767893	4944	816030	2.60836	3.84426	1.8518	0.173574
chr1	947693	951090	3398	chr1	1771243	1776487	5245	824473	-2.09517	3.84518	0.973285	0.323862
chr1	947693	951090	3398	chr1	2476096	2481428	5333	1529370	-2.09517	3.84518	0.973285	0.323862
chr1	993840	996417	2578	chr1	1070688	1076581	5894	78506	2.60836	3.84426	1.8518	0.173574
chr1	993840	996417	2578	chr1	1091969	1094657	2689	98184	-2.09517	3.84518	0.973285	0.323862
chr1	993840	996417	2578	chr1	1240233	1245867	5635	247921	-2.09517	3.84518	0.973285	0.323862
chr1	993840	996417	2578	chr1	1309279	1312529	3251	315775	2.60836	3.84426	1.8518	0.173574
chr1	993840	996417	2578	chr1	1405386	1409111	3726	412120	-2.09501	3.84509	0.973196	0.323884
chr1	993840	996417	2578	chr1	1793456	1798169	4714	800684	2.60836	3.84426	1.8518	0.173574
chr1	1017648	1019543	1896	chr1	1263249	1268476	5228	247267	-2.09517	3.84518	0.973285	0.323862
chr1	1017648	1019543	1896	chr1	1309279	1312529	3251	292308	0.51335	3.99501	0.0945291	0.758496
chr1	1017648	1019543	1896	chr1	1549906	1552004	2099	532359	2.60836	3.84426	1.8518	0.173574
chr1	1017648	1019543	1896	chr1	1563763	1567186	3424	546879	-2.09501	3.84509	0.973196	0.323884
chr1	1061928	1065340	3413	chr1	1070688	1076581	5894	10000	0.0402943	4.36923	0.00112977	0.973186
chr1	1061928	1065340	3413	chr1	1078194	1081930	3737	16428	-2.09501	3.84509	0.973196	0.323884
chr1	1061928	1065340	3413	chr1	1235008	1236742	1735	172241	-2.09517	3.84518	0.973285	0.323862
chr1	1061928	1065340	3413	chr1	1240233	1245867	5635	179416	-2.09517	3.84518	0.973285	0.323862
chr1	1061928	1065340	3413	chr1	1332499	1337197	4699	271214	-2.09517	3.84518	0.973285	0.323862
chr1	1061928	1065340	3413	chr1	1405386	1409111	3726	343614	-2.09501	3.84509	0.973196	0.323884
chr1	1061928	1065340	3413	chr1	1837198	1841609	4412	775769	2.60836	3.84426	1.8518	0.173574
chr1	1070688	1076581	5894	chr1	1078194	1081930	3737	6427	-0.209154	6.21716	0.115948	0.733471
chr1	1070688	1076581	5894	chr1	1091969	1094657	2689	19678	-2.46753	4.91063	4.37796	0.0364065
chr1	1070688	1076581	5894	chr1	1112754	1114681	1928	40083	-2.91569	3.99601	1.92426	0.165388
chr1	1070688	1076581	5894	chr1	1165102	1167882	2781	92857	1.43744	4.15215	0.932606	0.334187
chr1	1070688	1076581	5894	chr1	1207484	1210739	3256	135477	-3.43507	4.13208	2.85329	0.0911873
chr1	1070688	1076581	5894	chr1	1235008	1236742	1735	162240	-0.307176	4.13137	0.0400325	0.841417
chr1	1070688	1076581	5894	chr1	1240233	1245867	5635	169415	-1.14964	4.39123	0.703739	0.40153
chr1	1070688	1076581	5894	chr1	1259028	1262182	3155	186970	2.60836	3.84426	1.8518	0.173574
chr1	1070688	1076581	5894	chr1	1284938	1289967	5030	213818	-2.09517	3.84518	0.973285	0.323862
chr1	1070688	1076581	5894	chr1	1296637	1298764	2128	224066	-2.09517	3.84518	0.973285	0.323862
chr1	1070688	1076581	5894	chr1	1309279	1312529	3251	237269	2.60836	3.84426	1.8518	0.173574
chr1	1070688	1076581	5894	chr1	1332499	1337197	4699	261213	2.60836	3.84426	1.8518	0.173574
chr1	1070688	1076581	5894	chr1	1341072	1344217	3146	269010	-2.09501	3.84509	0.973196	0.323884
chr1	1070688	1076581	5894	chr1	1563763	1567186	3424	491840	-2.09517	3.84518	0.973285	0.323862
chr1	1070688	1076581	5894	chr1	1708427	1715416	6990	638287	-2.09517	3.84518	0.973285	0.323862
chr1	1070688	1076581	5894	chr1	1771243	1776487	5245	700230	4.00762	4.12967	5.3496	0.020727
chr1	1070688	1076581	5894	chr1	1820228	1824568	4341	748763	-2.09517	3.84518	0.973285	0.323862
chr1	1070688	1076581	5894	chr1	1837198	1841609	4412	765769	2.60836	3.84426	1.8518	0.173574
chr1	1070688	1076581	5894	chr1	2476096	2481428	5333	1405127	-2.09517	3.84518	0.973285	0.323862
chr1	1078194	1081930	3737	chr1	1091969	1094657	2689	13251	-0.886297	5.25986	1.04975	0.305565
chr1	1078194	1081930	3737	chr1	1112754	1114681	1928	33655	2.35018	4.38888	3.27611	0.0702954
chr1	1078194	1081930	3737	chr1	1165102	1167882	2781	86430	-0.64231	4.57336	0.309873	0.577758
chr1	1078194	1081930	3737	chr1	1207484	1210739	3256	129049	-0.585674	4.59456	0.259675	0.610344
chr1	1078194	1081930	3737	chr1	1235008	1236742	1735	155813	1.38051	4.13056	0.870365	0.350854
chr1	1078194	1081930	3737	chr1	1240233	1245867	5635	162988	-0.307176	4.13137	0.0400325	0.841417
chr1	1078194	1081930	3737	chr1	1259028	1262182	3155	180543	-2.91569	3.99601	1.92426	0.165388
chr1	1078194	1081930	3737	chr1	1263249	1268476	5228	185800	-2.09517	3.84518	0.973285	0.323862
chr1	1078194	1081930	3737	chr1	1309279	1312529	3251	230842	-0.307176	4.13137	0.0400325	0.841417
chr1	1078194	1081930	3737	chr1	1332499	1337197	4699	254786	2.66682	3.86614	1.9005	0.168022
chr1	1078194	1081930	3737	chr1	1341072	1344217	3146	262582	-2.09501	3.84509	0.973196	0.323884
chr1	1078194	1081930	3737	chr1	1445583	1448736	3154	367097	-2.09501	3.84509	0.973196	0.323884
chr1	1078194	1081930	3737	chr1	1589400	1591756	2357	510516	2.60836	3.84426	1.8518	0.173574
chr1	1078194	1081930	3737	chr1	1608442	1611221	2780	529769	-2.09501	3.84509	0.973196	0.323884
chr1	1078194	1081930	3737	chr1	1708427	1715416	6990	631859	-3.81677	4.25662	3.76328	0.0523897
chr1	1078194	1081930	3737	chr1	1762950	1767893	4944	685359	-2.09517	3.84518	0.973285	0.323862
chr1	1078194	1081930	3737	chr1	1771243	1776487	5245	693803	0.513182	3.9951	0.0944795	0.758558
chr1	1078194	1081930	3737	chr1	1793456	1798169	4714	715750	-2.09501	3.84509	0.973196	0.323884
chr1	1078194	1081930	3737	chr1	2042114	2045694	3581	963842	2.60836	3.84426	1.8518	0.173574
chr1	1091969	1094657	2689	chr1	1112754	1114681	1928	20404	-2.09501	3.84509	0.973196	0.323884
chr1	1091969	1094657	2689	chr1	1165102	1167882	2781	73179	0.617082	4.27632	0.20968	0.647018
chr1	1091969	1094657	2689	chr1	1207484	1210739	3256	115798	-2.09501	3.84509	0.973196	0.323884
chr1	1091969	1094657	2689	chr1	1235008	1236742	1735	142562	-2.09517	3.84518	0.973285	0.323862
chr1	1091969	1094657	2689	chr1	1240233	1245867	5635	149737	0.513182	3.9951	0.0944795	0.758558
chr1	1091969	1094657	2689	chr1	1284938	1289967	5030	194139	-2.09517	3.84518	0.973285	0.323862
chr1	1091969	1094657	2689	chr1	1332499	1337197	4699	241535	2.60836	3.84426	1.8518	0.173574
chr1	1091969	1094657	2689	chr1	1341072	1344217	3146	249331	3.53261	4.01592	3.72538	0.0535914
chr1	1091969	1094657	2689	chr1	1549906	1552004	2099	457642	-2.91537	3.99583	1.92392	0.165425
chr1	1091969	1094657	2689	chr1	1730421	1734323	3903	639059	-2.91569	3.99601	1.92426	0.165388
chr1	1091969	1094657	2689	chr1	1771243	1776487	5245	680552	-2.09501	3.84509	0.973196	0.323884
chr1	1091969	1094657	2689	chr1	1837198	1841609	4412	746090	-2.09501	3.84509	0.973196	0.323884
chr1	1112754	1114681	1928	chr1	1165102	1167882	2781	52774	-2.91537	3.99583	1.92392	0.165425
chr1	1112754	1114681	1928	chr1	1240233	1245867	5635	129332	-2.09501	3.84509	0.973196	0.323884
chr1	1165102	1167882	2781	chr1	1207484	1210739	3256	42619	0.51335	3.99501	0.0945291	0.758496
chr1	1165102	1167882	2781	chr1	1235008	1236742	1735	69383	-2.09501	3.84509	0.973196	0.323884
chr1	1165102	1167882	2781	chr1	1240233	1245867	5635	76558	0.513182	3.9951	0.0944795	0.758558
chr1	1165102	1167882	2781	chr1	1259028	1262182	3155	94113	-2.91553	3.99592	1.92409	0.165407
chr1	1165102	1167882	2781	chr1	1263249	1268476	5228	99370	2.60836	3.84426	1.8518	0.173574
chr1	1165102	1167882	2781	chr1	1332499	1337197	4699	168356	-0.307013	4.13128	0.0399955	0.841489
chr1	1165102	1167882	2781	chr1	1445583	1448736	3154	280667	2.60836	3.84426	1.8518	0.173574
chr1	1165102	1167882	2781	chr1	1492415	1494050	1636	326740	2.60836	3.84426	1.8518	0.173574
chr1	1165102	1167882	2781	chr1	1664867	1666259	1393	499071	-2.09517	3.84518	0.973285	0.323862
chr1	1165102	1167882	2781	chr1	1708427	1715416	6990	545429	-1.20826	4.37	0.773852	0.379028
chr1	1165102	1167882	2781	chr1	1762950	1767893	4944	598929	-2.09517	3.84518	0.973285	0.323862
chr1	1165102	1167882	2781	chr1	2515688	2518612	2925	1350658	2.60836	3.84426	1.8518	0.173574
chr1	1207484	1210739	3256	chr1	1240233	1245867	5635	33938	1.38067	4.13048	0.870548	0.350804
chr1	1207484	1210739	3256	chr1	1259028	1262182	3155	51493	0.513182	3.9951	0.0944795	0.758558
chr1	1207484	1210739	3256	chr1	1284938	1289967	5030	78341	-2.91537	3.99583	1.92392	0.165425
chr1	1207484	1210739	3256	chr1	1332499	1337197	4699	125736	2.66682	3.86614	1.9005	0.168022
chr1	1207484	1210739	3256	chr1	1405386	1409111	3726	198137	-2.09517	3.84518	0.973285	0.323862
chr1	1207484	1210739	3256	chr1	1445583	1448736	3154	238048	-2.09501	3.84509	0.973196	0.323884
chr1	1207484	1210739	3256	chr1	1508932	1511325	2394	301017	0.51335	3.99501	0.0945291	0.758496
chr1	1207484	1210739	3256	chr1	1664867	1666259	1393	456451	2.60836	3.84426	1.8518	0.173574
chr1	1207484	1210739	3256	chr1	1730421	1734323	3903	523260	-2.09517	3.84518	0.973285	0.323862
chr1	1207484	1210739	3256	chr1	1762950	1767893	4944	556310	2.60836	3.84426	1.8518	0.173574
chr1	1207484	1210739	3256	chr1	1771243	1776487	5245	564753	0.51335	3.99501	0.0945291	0.758496
chr1	1207484	1210739	3256	chr1	2042114	2045694	3581	834792	-2.09501	3.84509	0.973196	0.323884
chr1	1235008	1236742	1735	chr1	1240233	1245867	5635	7175	0.00274798	4.7065	2.9646e-06	0.998626
chr1	1235008	1236742	1735	chr1	1259028	1262182	3155	24730	0.51335	3.99501	0.0945291	0.758496
chr1	1235008	1236742	1735	chr1	1296637	1298764	2128	61825	-2.09517	3.84518	0.973285	0.323862
chr1	1235008	1236742	1735	chr1	1309279	1312529	3251	75029	-2.91569	3.99601	1.92426	0.165388
chr1	1235008	1236742	1735	chr1	1332499	1337197	4699	98973	2.60836	3.84426	1.8518	0.173574
chr1	1235008	1236742	1735	chr1	1445583	1448736	3154	211284	3.47568	3.9942	3.63313	0.0566402
chr1	1235008	1236742	1735	chr1	1589400	1591756	2357	354703	2.60836	3.84426	1.8518	0.173574
chr1	1235008	1236742	1735	chr1	2476096	2481428	5333	1242887	-2.91537	3.99583	1.92392	0.165425
chr1	1240233	1245867	5635	chr1	1259028	1262182	3155	17555	0.743783	5.1769	0.833168	0.361358
chr1	1240233	1245867	5635	chr1	1263249	1268476	5228	22812	-2.09517	3.84518	0.973285	0.323862
chr1	1240233	1245867	5635	chr1	1284938	1289967	5030	44402	-2.09517	3.84518	0.973285	0.323862
chr1	1240233	1245867	5635	chr1	1296637	1298764	2128	54650	-2.09517	3.84518	0.973285	0.323862
chr1	1240233	1245867	5635	chr1	1309279	1312529	3251	67854	-0.341085	4.47502	0.0807184	0.776326
chr1	1240233	1245867	5635	chr1	1332499	1337197	4699	91798	-1.75839	4.57395	1.87403	0.171014
chr1	1240233	1245867	5635	chr1	1341072	1344217	3146	99594	-2.91537	3.99583	1.92392	0.165425
chr1	1240233	1245867	5635	chr1	1405386	1409111	3726	164198	0.513182	3.9951	0.0944795	0.758558
chr1	1240233	1245867	5635	chr1	1445583	1448736	3154	204109	-2.91537	3.99583	1.92392	0.165425
chr1	1240233	1245867	5635	chr1	1492415	1494050	1636	250182	-2.09501	3.84509	0.973196	0.323884
chr1	1240233	1245867	5635	chr1	1608442	1611221	2780	366781	0.513182	3.9951	0.0944795	0.758558
chr1	1240233	1245867	5635	chr1	1623327	1625328	2002	381277	-2.09517	3.84518	0.973285	0.323862
chr1	1240233	1245867	5635	chr1	1754631	1756089	1459	512310	2.66682	3.86614	1.9005	0.168022
chr1	1240233	1245867	5635	chr1	1820228	1824568	4341	579348	-2.09501	3.84509	0.973196	0.323884
chr1	1240233	1245867	5635	chr1	2185818	2188841	3024	944279	2.60836	3.84426	1.8518	0.173574
chr1	1240233	1245867	5635	chr1	2507996	2510952	2957	1266424	-2.09501	3.84509	0.973196	0.323884
chr1	1259028	1262182	3155	chr1	1263249	1268476	5228	5257	2.5083	4.86987	6.11333	0.0134166
chr1	1259028	1262182	3155	chr1	1284938	1289967	5030	26847	-3.8163	4.25637	3.76235	0.052419
chr1	1259028	1262182	3155	chr1	1296637	1298764	2128	37095	-3.43523	4.13217	2.85353	0.0911734
chr1	1259028	1262182	3155	chr1	1309279	1312529	3251	50299	-2.91537	3.99583	1.92392	0.165425
chr1	1259028	1262182	3155	chr1	1332499	1337197	4699	74243	-1.75882	4.57419	1.87497	0.170907
chr1	1259028	1262182	3155	chr1	1341072	1344217	3146	82039	1.38067	4.13048	0.870548	0.350804
chr1	1259028	1262182	3155	chr1	1405386	1409111	3726	146643	-2.09517	3.84518	0.973285	0.323862
chr1	1259028	1262182	3155	chr1	1445583	1448736	3154	186554	-2.09501	3.84509	0.973196	0.323884
chr1	1259028	1262182	3155	chr1	1549906	1552004	2099	290350	2.66682	3.86614	1.9005	0.168022
chr1	1259028	1262182	3155	chr1	1563763	1567186	3424	304869	0.51335	3.99501	0.0945291	0.758496
chr1	1259028	1262182	3155	chr1	1608442	1611221	2780	349226	-2.09517	3.84518	0.973285	0.323862
chr1	1259028	1262182	3155	chr1	1623327	1625328	2002	363722	0.51335	3.99501	0.0945291	0.758496
chr1	1259028	1262182	3155	chr1	1708427	1715416	6990	451316	-2.91569	3.99601	1.92426	0.165388
chr1	1259028	1262182	3155	chr1	1771243	1776487	5245	513260	0.513182	3.9951	0.0944795	0.758558
chr1	1259028	1262182	3155	chr1	1837198	1841609	4412	578798	1.38051	4.13056	0.870365	0.350854
chr1	1259028	1262182	3155	chr1	2476096	2481428	5333	1218157	-2.09501	3.84509	0.973196	0.323884
chr1	1263249	1268476	5228	chr1	1309279	1312529	3251	45041	0.513182	3.9951	0.0944795	0.758558
chr1	1263249	1268476	5228	chr1	1332499	1337197	4699	68985	-2.91537	3.99583	1.92392	0.165425
chr1	1263249	1268476	5228	chr1	1508932	1511325	2394	244266	2.66682	3.86614	1.9005	0.168022
chr1	1263249	1268476	5228	chr1	1563763	1567186	3424	299612	2.60836	3.84426	1.8518	0.173574
chr1	1263249	1268476	5228	chr1	1771243	1776487	5245	508002	2.60836	3.84426	1.8518	0.173574
chr1	1263249	1268476	5228	chr1	1837198	1841609	4412	573541	-2.09517	3.84518	0.973285	0.323862
chr1	1284938	1289967	5030	chr1	1296637	1298764	2128	10248	-3.43507	4.13208	2.85329	0.0911873
chr1	1284938	1289967	5030	chr1	1309279	1312529	3251	23451	-2.91553	3.99592	1.92409	0.165407
chr1	1284938	1289967	5030	chr1	1332499	1337197	4699	47395	-0.307013	4.13128	0.0399955	0.841489
chr1	1284938	1289967	5030	chr1	1341072	1344217	3146	55192	-2.91553	3.99592	1.92409	0.165407
chr1	1284938	1289967	5030	chr1	1445583	1448736	3154	159707	-0.768411	4.27711	0.288878	0.59094
chr1	1284938	1289967	5030	chr1	1508932	1511325	2394	222676	-2.09501	3.84509	0.973196	0.323884
chr1	1284938	1289967	5030	chr1	1563763	1567186	3424	278022	-2.09501	3.84509	0.973196	0.323884
chr1	1284938	1289967	5030	chr1	1730421	1734323	3903	444919	2.60836	3.84426	1.8518	0.173574
chr1	1296637	1298764	2128	chr1	1309279	1312529	3251	13203	-1.14995	4.3914	0.704095	0.401411
chr1	1296637	1298764	2128	chr1	1332499	1337197	4699	37147	-2.09501	3.84509	0.973196	0.323884
chr1	1296637	1298764	2128	chr1	1341072	1344217	3146	44944	0.51335	3.99501	0.0945291	0.758496
chr1	1296637	1298764	2128	chr1	1405386	1409111	3726	109548	3.47568	3.9942	3.63313	0.0566402
chr1	1296637	1298764	2128	chr1	1708427	1715416	6990	414221	-2.09517	3.84518	0.973285	0.323862
chr1	1296637	1298764	2128	chr1	1771243	1776487	5245	476164	2.60836	3.84426	1.8518	0.173574
chr1	1309279	1312529	3251	chr1	1332499	1337197	4699	23944	-0.612927	5.45688	0.621689	0.43042
chr1	1309279	1312529	3251	chr1	1341072	1344217	3146	31740	0.572236	4.47418	0.248239	0.618318
chr1	1309279	1312529	3251	chr1	1405386	1409111	3726	96344	-2.09501	3.84509	0.973196	0.323884
chr1	1309279	1312529	3251	chr1	1445583	1448736	3154	136255	-0.340778	4.47486	0.0805815	0.776511
chr1	1309279	1312529	3251	chr1	1456629	1460460	3832	147640	-2.09501	3.84509	0.973196	0.323884
chr1	1309279	1312529	3251	chr1	1563763	1567186	3424	254570	2.60836	3.84426	1.8518	0.173574
chr1	1309279	1312529	3251	chr1	1708427	1715416	6990	401017	3.47568	3.9942	3.63313	0.0566402
chr1	1309279	1312529	3251	chr1	1771243	1776487	5245	462961	-0.307013	4.13128	0.0399955	0.841489
chr1	1309279	1312529	3251	chr1	1820228	1824568	4341	511494	-2.09501	3.84509	0.973196	0.323884
chr1	1309279	1312529	3251	chr1	1837198	1841609	4412	528499	-2.91537	3.99583	1.92392	0.165425
chr1	1309279	1312529	3251	chr1	2322250	2324955	2706	1012698	0.513182	3.9951	0.0944795	0.758558
chr1	1309279	1312529	3251	chr1	2342909	2346095	3187	1033598	2.60836	3.84426	1.8518	0.173574
chr1	1332499	1337197	4699	chr1	1341072	1344217	3146	7796	-0.800051	5.84881	1.33072	0.248677
chr1	1332499	1337197	4699	chr1	1405386	1409111	3726	72400	0.191317	4.57237	0.0309513	0.860349
chr1	1332499	1337197	4699	chr1	1445583	1448736	3154	112311	-1.20841	4.37008	0.774039	0.37897
chr1	1332499	1337197	4699	chr1	1456629	1460460	3832	123696	0.513182	3.9951	0.0944795	0.758558
chr1	1332499	1337197	4699	chr1	1492415	1494050	1636	158384	3.47568	3.9942	3.63313	0.0566402
chr1	1332499	1337197	4699	chr1	1508932	1511325	2394	175280	-2.09517	3.84518	0.973285	0.323862
chr1	1332499	1337197	4699	chr1	1540602	1543788	3187	207347	0.513182	3.9951	0.0944795	0.758558
chr1	1332499	1337197	4699	chr1	1549906	1552004	2099	216107	0.560311	4.25479	0.176769	0.674165
chr1	1332499	1337197	4699	chr1	1589400	1591756	2357	255730	-2.09517	3.84518	0.973285	0.323862
chr1	1332499	1337197	4699	chr1	1608442	1611221	2780	274983	2.60836	3.84426	1.8518	0.173574
chr1	1332499	1337197	4699	chr1	1623327	1625328	2002	289479	-2.09517	3.84518	0.973285	0.323862
chr1	1332499	1337197	4699	chr1	1708427	1715416	6990	377073	-0.82703	4.25575	0.330401	0.565423
chr1	1332499	1337197	4699	chr1	1762950	1767893	4944	430573	2.60836	3.84426	1.8518	0.173574
chr1	1332499	1337197	4699	chr1	1771243	1776487	5245	439017	-2.09501	3.84509	0.973196	0.323884
chr1	1332499	1337197	4699	chr1	1793456	1798169	4714	460964	-2.09501	3.84509	0.973196	0.323884
chr1	1332499	1337197	4699	chr1	1820228	1824568	4341	487550	-2.09517	3.84518	0.973285	0.323862
chr1	1332499	1337197	4699	chr1	1830551	1833838	3288	497346	-2.09517	3.84518	0.973285	0.323862
chr1	1332499	1337197	4699	chr1	1837198	1841609	4412	504555	-3.43507	4.13208	2.85329	0.0911873
chr1	1332499	1337197	4699	chr1	1926881	1928637	1757	592911	-2.09517	3.84518	0.973285	0.323862
chr1	1332499	1337197	4699	chr1	1980380	1983027	2648	646855	-2.09501	3.84509	0.973196	0.323884
chr1	1332499	1337197	4699	chr1	2476096	2481428	5333	1143914	-2.09517	3.84518	0.973285	0.323862
chr1	1332499	1337197	4699	chr1	2507996	2510952	2957	1174626	0.513182	3.9951	0.0944795	0.758558
chr1	1341072	1344217	3146	chr1	1405386	1409111	3726	64604	4.06313	4.15125	5.48097	0.0192246
chr1	1341072	1344217	3146	chr1	1445583	1448736	3154	104515	0.513182	3.9951	0.0944795	0.758558
chr1	1341072	1344217	3146	chr1	1492415	1494050	1636	150588	2.60836	3.84426	1.8518	0.173574
chr1	1341072	1344217	3146	chr1	1508932	1511325	2394	167484	2.60836	3.84426	1.8518	0.173574
chr1	1341072	1344217	3146	chr1	1708427	1715416	6990	369277	-2.09517	3.84518	0.973285	0.323862
chr1	1341072	1344217	3146	chr1	1762950	1767893	4944	422777	-2.09501	3.84509	0.973196	0.323884
chr1	1341072	1344217	3146	chr1	1771243	1776487	5245	431220	-2.09517	3.84518	0.973285	0.323862
chr1	1341072	1344217	3146	chr1	1837198	1841609	4412	496759	-2.09517	3.84518	0.973285	0.323862
chr1	1341072	1344217	3146	chr1	2125478	2127907	2430	784048	2.60836	3.84426	1.8518	0.173574
chr1	1405386	1409111	3726	chr1	1445583	1448736	3154	39911	-0.826872	4.25566	0.330286	0.565491
chr1	1405386	1409111	3726	chr1	1508932	1511325	2394	102880	-2.09517	3.84518	0.973285	0.323862
chr1	1405386	1409111	3726	chr1	1540602	1543788	3187	134946	-2.09501	3.84509	0.973196	0.323884
chr1	1405386	1409111	3726	chr1	1549906	1552004	2099	143706	2.60836	3.84426	1.8518	0.173574
chr1	1405386	1409111	3726	chr1	1589400	1591756	2357	183329	-2.09501	3.84509	0.973196	0.323884
chr1	1405386	1409111	3726	chr1	1608442	1611221	2780	202583	-2.91553	3.99592	1.92409	0.165407
chr1	1405386	1409111	3726	chr1	1623327	1625328	2002	217079	-2.09501	3.84509	0.973196	0.323884
chr1	1405386	1409111	3726	chr1	1664867	1666259	1393	258314	2.60836	3.84426	1.8518	0.173574
chr1	1405386	1409111	3726	chr1	1708427	1715416	6990	304673	3.47568	3.9942	3.63313	0.0566402
chr1	1405386	1409111	3726	chr1	1730421	1734323	3903	325123	-2.09501	3.84509	0.973196	0.323884
chr1	1405386	1409111	3726	chr1	1793456	1798169	4714	388564	-2.09501	3.84509	0.973196	0.323884
chr1	1405386	1409111	3726	chr1	1837198	1841609	4412	432155	-2.09517	3.84518	0.973285	0.323862
chr1	1405386	1409111	3726	chr1	1980380	1983027	2648	574455	2.66682	3.86614	1.9005	0.168022
chr1	1405386	1409111	3726	chr1	2185818	2188841	3024	780081	-2.09517	3.84518	0.973285	0.323862
chr1	1405386	1409111	3726	chr1	2476096	2481428	5333	1071513	2.66682	3.86614	1.9005	0.168022
chr1	1445583	1448736	3154	chr1	1456629	1460460	3832	11385	-1.50948	4.4757	1.2998	0.254251
chr1	1445583	1448736	3154	chr1	1492415	1494050	1636	46073	0.51335	3.99501	0.0945291	0.758496
chr1	1445583	1448736	3154	chr1	1508932	1511325	2394	62969	1.38051	4.13056	0.870365	0.350854
chr1	1445583	1448736	3154	chr1	1549906	1552004	2099	103795	-2.09501	3.84509	0.973196	0.323884
chr1	1445583	1448736	3154	chr1	1563763	1567186	3424	118315	-2.09517	3.84518	0.973285	0.323862
chr1	1445583	1448736	3154	chr1	1589400	1591756	2357	143418	-2.09517	3.84518	0.973285	0.323862
chr1	1445583	1448736	3154	chr1	1608442	1611221	2780	162672	0.51335	3.99501	0.0945291	0.758496
chr1	1445583	1448736	3154	chr1	1623327	1625328	2002	177168	-2.09501	3.84509	0.973196	0.323884
chr1	1445583	1448736	3154	chr1	1708427	1715416	6990	264762	1.09209	4.36837	0.787884	0.374741
chr1	1445583	1448736	3154	chr1	1762950	1767893	4944	318262	-2.09517	3.84518	0.973285	0.323862
chr1	1445583	1448736	3154	chr1	1771243	1776487	5245	326705	-2.91553	3.99592	1.92409	0.165407
chr1	1445583	1448736	3154	chr1	1820228	1824568	4341	375238	2.66682	3.86614	1.9005	0.168022
chr1	1445583	1448736	3154	chr1	1837198	1841609	4412	392244	-0.307339	4.13145	0.0400697	0.841344
chr1	1445583	1448736	3154	chr1	2125478	2127907	2430	679533	-2.91553	3.99592	1.92409	0.165407
chr1	1445583	1448736	3154	chr1	2330581	2333078	2498	884670	-2.09517	3.84518	0.973285	0.323862
chr1	1445583	1448736	3154	chr1	2868473	2870791	2319	1422472	2.60836	3.84426	1.8518	0.173574
chr1	1456629	1460460	3832	chr1	1492415	1494050	1636	34688	2.60836	3.84426	1.8518	0.173574
chr1	1456629	1460460	3832	chr1	1589400	1591756	2357	132033	-2.09501	3.84509	0.973196	0.323884
chr1	1456629	1460460	3832	chr1	1608442	1611221	2780	151287	2.60836	3.84426	1.8518	0.173574
chr1	1456629	1460460	3832	chr1	1708427	1715416	6990	253377	-2.09501	3.84509	0.973196	0.323884
chr1	1456629	1460460	3832	chr1	1754631	1756089	1459	296815	-2.09501	3.84509	0.973196	0.323884
chr1	1492415	1494050	1636	chr1	1508932	1511325	2394	16896	-2.09501	3.84509	0.973196	0.323884
chr1	1492415	1494050	1636	chr1	1708427	1715416	6990	218689	-2.91537	3.99583	1.92392	0.165425
chr1	1492415	1494050	1636	chr1	1771243	1776487	5245	280632	-2.09517	3.84518	0.973285	0.323862
chr1	1492415	1494050	1636	chr1	1837198	1841609	4412	346171	2.60836	3.84426	1.8518	0.173574
chr1	1508932	1511325	2394	chr1	1540602	1543788	3187	32066	-0.826872	4.25566	0.330286	0.565491
chr1	1508932	1511325	2394	chr1	1549906	1552004	2099	40826	-2.91553	3.99592	1.92409	0.165407
chr1	1508932	1511325	2394	chr1	1563763	1567186	3424	55346	-1.97112	4.6661	2.47947	0.115341
chr1	1508932	1511325	2394	chr1	1608442	1611221	2780	99703	0.513182	3.9951	0.0944795	0.758558
chr1	1508932	1511325	2394	chr1	1708427	1715416	6990	201793	0.51335	3.99501	0.0945291	0.758496
chr1	1508932	1511325	2394	chr1	1762950	1767893	4944	255293	-2.09517	3.84518	0.973285	0.323862
chr1	1508932	1511325	2394	chr1	1771243	1776487	5245	263736	-2.91569	3.99601	1.92426	0.165388
chr1	1508932	1511325	2394	chr1	1793456	1798169	4714	285684	-2.09501	3.84509	0.973196	0.323884
chr1	1508932	1511325	2394	chr1	1830551	1833838	3288	322066	-2.09501	3.84509	0.973196	0.323884
chr1	1508932	1511325	2394	chr1	1837198	1841609	4412	329275	-2.09501	3.84509	0.973196	0.323884
chr1	1508932	1511325	2394	chr1	2322250	2324955	2706	813474	2.60836	3.84426	1.8518	0.173574
chr1	1508932	1511325	2394	chr1	2476096	2481428	5333	968633	2.60836	3.84426	1.8518	0.173574
chr1	1540602	1543788	3187	chr1	1549906	1552004	2099	8760	-0.307013	4.13128	0.0399955	0.841489
chr1	1540602	1543788	3187	chr1	1563763	1567186	3424	23279	-3.43539	4.13226	2.85378	0.0911595
chr1	1540602	1543788	3187	chr1	1608442	1611221	2780	67636	-2.09517	3.84518	0.973285	0.323862
chr1	1540602	1543788	3187	chr1	1762950	1767893	4944	223226	0.513182	3.9951	0.0944795	0.758558
chr1	1540602	1543788	3187	chr1	1771243	1776487	5245	231670	2.60836	3.84426	1.8518	0.173574
chr1	1540602	1543788	3187	chr1	1837198	1841609	4412	297208	-2.09517	3.84518	0.973285	0.323862
chr1	1549906	1552004	2099	chr1	1563763	1567186	3424	14519	-1.50948	4.4757	1.2998	0.254251
chr1	1549906	1552004	2099	chr1	1589400	1591756	2357	39623	-2.09517	3.84518	0.973285	0.323862
chr1	1549906	1552004	2099	chr1	1608442	1611221	2780	58876	-2.91553	3.99592	1.92409	0.165407
chr1	1549906	1552004	2099	chr1	1623327	1625328	2002	73372	-2.09517	3.84518	0.973285	0.323862
chr1	1549906	1552004	2099	chr1	1654718	1657045	2328	104926	-2.09517	3.84518	0.973285	0.323862
chr1	1549906	1552004	2099	chr1	1664867	1666259	1393	114608	2.60836	3.84426	1.8518	0.173574
chr1	1549906	1552004	2099	chr1	1708427	1715416	6990	160966	-0.307176	4.13137	0.0400325	0.841417
chr1	1549906	1552004	2099	chr1	1730421	1734323	3903	181417	2.60836	3.84426	1.8518	0.173574
chr1	1549906	1552004	2099	chr1	1754631	1756089	1459	204405	-2.09517	3.84518	0.973285	0.323862
chr1	1549906	1552004	2099	chr1	1771243	1776487	5245	222910	-2.91569	3.99601	1.92426	0.165388
chr1	1549906	1552004	2099	chr1	1793456	1798169	4714	244857	0.513182	3.9951	0.0944795	0.758558
chr1	1549906	1552004	2099	chr1	1837198	1841609	4412	288448	-2.91553	3.99592	1.92409	0.165407
chr1	1563763	1567186	3424	chr1	1608442	1611221	2780	44357	-0.307339	4.13145	0.0400697	0.841344
chr1	1563763	1567186	3424	chr1	1623327	1625328	2002	58853	-3.43539	4.13226	2.85378	0.0911595
chr1	1563763	1567186	3424	chr1	1664867	1666259	1393	100088	-2.09517	3.84518	0.973285	0.323862
chr1	1563763	1567186	3424	chr1	1708427	1715416	6990	146447	2.29616	4.36751	3.13838	0.0764697
chr1	1563763	1567186	3424	chr1	1730421	1734323	3903	166897	3.47568	3.9942	3.63313	0.0566402
chr1	1563763	1567186	3424	chr1	1754631	1756089	1459	189885	-2.09517	3.84518	0.973285	0.323862
chr1	1563763	1567186	3424	chr1	1762950	1767893	4944	199947	-2.09501	3.84509	0.973196	0.323884
chr1	1563763	1567186	3424	chr1	1771243	1776487	5245	208390	1.38067	4.13048	0.870548	0.350804
chr1	1563763	1567186	3424	chr1	1793456	1798169	4714	230338	0.51335	3.99501	0.0945291	0.758496
chr1	1563763	1567186	3424	chr1	1820228	1824568	4341	256923	-2.09501	3.84509	0.973196	0.323884
chr1	1563763	1567186	3424	chr1	1837198	1841609	4412	273929	-1.20841	4.37008	0.774039	0.37897
chr1	1563763	1567186	3424	chr1	1868118	1870808	2691	303988	-2.09517	3.84518	0.973285	0.323862
chr1	1563763	1567186	3424	chr1	1980380	1983027	2648	416229	-2.09517	3.84518	0.973285	0.323862
chr1	1563763	1567186	3424	chr1	2125478	2127907	2430	561218	-2.09501	3.84509	0.973196	0.323884
chr1	1563763	1567186	3424	chr1	2485419	2491852	6434	923161	-2.09501	3.84509	0.973196	0.323884
chr1	1589400	1591756	2357	chr1	1623327	1625328	2002	33749	-2.09517	3.84518	0.973285	0.323862
chr1	1589400	1591756	2357	chr1	1654718	1657045	2328	65303	2.66682	3.86614	1.9005	0.168022
chr1	1589400	1591756	2357	chr1	1708427	1715416	6990	121343	0.51335	3.99501	0.0945291	0.758496
chr1	1589400	1591756	2357	chr1	1771243	1776487	5245	183287	-2.09501	3.84509	0.973196	0.323884
chr1	1589400	1591756	2357	chr1	1837198	1841609	4412	248825	-2.09501	3.84509	0.973196	0.323884
chr1	1608442	1611221	2780	chr1	1623327	1625328	2002	14496	-1.45262	4.9097	1.93081	0.16467
chr1	1608442	1611221	2780	chr1	1654718	1657045	2328	46050	-2.09517	3.84518	0.973285	0.323862
chr1	1608442	1611221	2780	chr1	1664867	1666259	1393	55731	0.513182	3.9951	0.0944795	0.758558
chr1	1608442	1611221	2780	chr1	1708427	1715416	6990	102090	-4.76449	4.66683	7.21581	0.00722642
chr1	1608442	1611221	2780	chr1	1730421	1734323	3903	122540	1.38067	4.13048	0.870548	0.350804
chr1	1608442	1611221	2780	chr1	1762950	1767893	4944	155590	-3.81661	4.25654	3.76297	0.0523995
chr1	1608442	1611221	2780	chr1	1771243	1776487	5245	164033	-1.75853	4.57403	1.87434	0.170979
chr1	1608442	1611221	2780	chr1	1793456	1798169	4714	185981	-0.826872	4.25566	0.330286	0.565491
chr1	1608442	1611221	2780	chr1	1820228	1824568	4341	212566	-3.81661	4.25654	3.76297	0.0523995
chr1	1608442	1611221	2780	chr1	1837198	1841609	4412	229572	2.60836	3.84426	1.8518	0.173574
chr1	1608442	1611221	2780	chr1	2042114	2045694	3581	434072	2.60836	3.84426	1.8518	0.173574
chr1	1608442	1611221	2780	chr1	2185818	2188841	3024	577498	-2.09517	3.84518	0.973285	0.323862
chr1	1608442	1611221	2780	chr1	2342909	2346095	3187	734670	-3.43554	4.13234	2.85402	0.0911457
chr1	1608442	1611221	2780	chr1	2515688	2518612	2925	907318	2.60836	3.84426	1.8518	0.173574
chr1	1623327	1625328	2002	chr1	1708427	1715416	6990	87594	-0.571853	4.83222	0.325545	0.568294
chr1	1623327	1625328	2002	chr1	1730421	1734323	3903	108044	2.60836	3.84426	1.8518	0.173574
chr1	1623327	1625328	2002	chr1	1762950	1767893	4944	141094	0.513182	3.9951	0.0944795	0.758558
chr1	1623327	1625328	2002	chr1	1771243	1776487	5245	149537	0.513182	3.9951	0.0944795	0.758558
chr1	1623327	1625328	2002	chr1	1820228	1824568	4341	198070	3.53261	4.01592	3.72538	0.0535914
chr1	1623327	1625328	2002	chr1	1830551	1833838	3288	207867	-2.09501	3.84509	0.973196	0.323884
chr1	1623327	1625328	2002	chr1	1837198	1841609	4412	215076	0.572077	4.47426	0.248113	0.618407
chr1	1623327	1625328	2002	chr1	1926881	1928637	1757	303431	2.60836	3.84426	1.8518	0.173574
chr1	1623327	1625328	2002	chr1	2042114	2045694	3581	419576	-2.09501	3.84509	0.973196	0.323884
chr1	1623327	1625328	2002	chr1	2485419	2491852	6434	864308	2.60836	3.84426	1.8518	0.173574
chr1	1623327	1625328	2002	chr1	2868473	2870791	2319	1245304	-2.09517	3.84518	0.973285	0.323862
chr1	1623327	1625328	2002	chr1	3580071	3585990	5920	1958703	-2.09501	3.84509	0.973196	0.323884
chr1	1623327	1625328	2002	chr1	3592833	3597063	4231	1970620	-2.09501	3.84509	0.973196	0.323884
chr1	1654718	1657045	2328	chr1	1708427	1715416	6990	56040	-2.91553	3.99592	1.92409	0.165407
chr1	1654718	1657045	2328	chr1	1762950	1767893	4944	109540	3.47568	3.9942	3.63313	0.0566402
chr1	1654718	1657045	2328	chr1	1771243	1776487	5245	117983	-0.826872	4.25566	0.330286	0.565491
chr1	1654718	1657045	2328	chr1	1820228	1824568	4341	166516	2.60836	3.84426	1.8518	0.173574
chr1	1654718	1657045	2328	chr1	1830551	1833838	3288	176313	-2.09501	3.84509	0.973196	0.323884
chr1	1664867	1666259	1393	chr1	1730421	1734323	3903	66809	-2.09501	3.84509	0.973196	0.323884
chr1	1664867	1666259	1393	chr1	1771243	1776487	5245	108302	-0.307339	4.13145	0.0400697	0.841344
chr1	1664867	1666259	1393	chr1	1837198	1841609	4412	173840	0.513182	3.9951	0.0944795	0.758558
chr1	1708427	1715416	6990	chr1	1730421	1734323	3903	20450	-0.0047885	6.50705	5.69039e-05	0.993981
chr1	1708427	1715416	6990	chr1	1754631	1756089	1459	43438	-1.43693	5.24076	2.51451	0.112803
chr1	1708427	1715416	6990	chr1	1762950	1767893	4944	53500	-0.0426565	6.64776	0.00587955	0.93888
chr1	1708427	1715416	6990	chr1	1771243	1776487	5245	61943	0.275622	7.35806	0.331959	0.564508
chr1	1708427	1715416	6990	chr1	1793456	1798169	4714	83891	0.326152	6.50566	0.34001	0.559824
chr1	1708427	1715416	6990	chr1	1820228	1824568	4341	110476	-0.114208	5.72838	0.0268369	0.869873
chr1	1708427	1715416	6990	chr1	1830551	1833838	3288	120273	-0.385245	5.17901	0.204947	0.650757
chr1	1708427	1715416	6990	chr1	1837198	1841609	4412	127482	-0.501648	6.8469	0.877196	0.348971
chr1	1708427	1715416	6990	chr1	1868118	1870808	2691	157541	0.51335	3.99501	0.0945291	0.758496
chr1	1708427	1715416	6990	chr1	1926881	1928637	1757	215837	1.38051	4.13056	0.870365	0.350854
chr1	1708427	1715416	6990	chr1	1980380	1983027	2648	269782	-2.09517	3.84518	0.973285	0.323862
chr1	1708427	1715416	6990	chr1	2042114	2045694	3581	331982	-2.09517	3.84518	0.973285	0.323862
chr1	1708427	1715416	6990	chr1	2125478	2127907	2430	414771	-2.09501	3.84509	0.973196	0.323884
chr1	1708427	1715416	6990	chr1	2185818	2188841	3024	475408	2.60836	3.84426	1.8518	0.173574
chr1	1708427	1715416	6990	chr1	2322250	2324955	2706	611681	3.47568	3.9942	3.63313	0.0566402
chr1	1708427	1715416	6990	chr1	2342909	2346095	3187	632580	-2.09517	3.84518	0.973285	0.323862
chr1	1708427	1715416	6990	chr1	2424097	2429120	5024	714687	2.60836	3.84426	1.8518	0.173574
chr1	1708427	1715416	6990	chr1	2476096	2481428	5333	766840	0.51335	3.99501	0.0945291	0.758496
chr1	1708427	1715416	6990	chr1	2485419	2491852	6434	776714	-2.91569	3.99601	1.92426	0.165388
chr1	1708427	1715416	6990	chr1	2507996	2510952	2957	797552	2.60836	3.84426	1.8518	0.173574
chr1	1708427	1715416	6990	chr1	2515688	2518612	2925	805228	-2.09517	3.84518	0.973285	0.323862
chr1	1708427	1715416	6990	chr1	2868473	2870791	2319	1157710	2.60836	3.84426	1.8518	0.173574
chr1	1708427	1715416	6990	chr1	3580071	3585990	5920	1871109	3.47568	3.9942	3.63313	0.0566402
chr1	1730421	1734323	3903	chr1	1754631	1756089	1459	22988	0.560311	4.25479	0.176769	0.674165
chr1	1730421	1734323	3903	chr1	1762950	1767893	4944	33049	0.226471	5.61728	0.102213	0.74919
chr1	1730421	1734323	3903	chr1	1771243	1776487	5245	41493	-0.181734	6.07953	0.0805835	0.776508
chr1	1730421	1734323	3903	chr1	1793456	1798169	4714	63440	-1.73337	5.05179	2.93416	0.086724
chr1	1730421	1734323	3903	chr1	1820228	1824568	4341	90026	1.00996	4.5928	0.860968	0.353468
chr1	1730421	1734323	3903	chr1	1830551	1833838	3288	99822	0.560148	4.25488	0.176678	0.674244
chr1	1730421	1734323	3903	chr1	1837198	1841609	4412	107031	0.667246	5.15472	0.627125	0.428412
chr1	1730421	1734323	3903	chr1	2042114	2045694	3581	311532	2.66682	3.86614	1.9005	0.168022
chr1	1730421	1734323	3903	chr1	2515688	2518612	2925	784778	-0.307176	4.13137	0.0400325	0.841417
chr1	1754631	1756089	1459	chr1	1762950	1767893	4944	10061	0.0780257	4.85221	0.0064063	0.936206
chr1	1754631	1756089	1459	chr1	1771243	1776487	5245	18505	1.09116	5.31362	1.94177	0.163476
chr1	1754631	1756089	1459	chr1	1793456	1798169	4714	40452	0.513182	3.9951	0.0944795	0.758558
chr1	1754631	1756089	1459	chr1	1820228	1824568	4341	67038	2.60836	3.84426	1.8518	0.173574
chr1	1754631	1756089	1459	chr1	1830551	1833838	3288	76834	3.47568	3.9942	3.63313	0.0566402
chr1	1754631	1756089	1459	chr1	1837198	1841609	4412	84043	4.39116	4.25321	7.00615	0.00812303
chr1	1762950	1767893	4944	chr1	1771243	1776487	5245	8443	-0.219369	8.33489	0.258561	0.61111
chr1	1762950	1767893	4944	chr1	1793456	1798169	4714	30391	0.147338	6.52368	0.0683458	0.793761
chr1	1762950	1767893	4944	chr1	1820228	1824568	4341	56976	1.7135	5.06727	3.79771	0.0513226
chr1	1762950	1767893	4944	chr1	1830551	1833838	3288	66773	0.955777	4.57178	0.777691	0.377848
chr1	1762950	1767893	4944	chr1	1837198	1841609	4412	73982	0.107581	5.80656	0.0251353	0.87403
chr1	1762950	1767893	4944	chr1	1868118	1870808	2691	104041	2.60836	3.84426	1.8518	0.173574
chr1	1762950	1767893	4944	chr1	1926881	1928637	1757	162337	0.51335	3.99501	0.0945291	0.758496
chr1	1762950	1767893	4944	chr1	1980380	1983027	2648	216282	-2.09517	3.84518	0.973285	0.323862
chr1	1762950	1767893	4944	chr1	2476096	2481428	5333	713340	2.60836	3.84426	1.8518	0.173574
chr1	1762950	1767893	4944	chr1	2485419	2491852	6434	723214	-2.09501	3.84509	0.973196	0.323884
chr1	1762950	1767893	4944	chr1	2507996	2510952	2957	744052	-2.09501	3.84509	0.973196	0.323884
chr1	1762950	1767893	4944	chr1	2515688	2518612	2925	751728	-0.307013	4.13128	0.0399955	0.841489
chr1	1771243	1776487	5245	chr1	1793456	1798169	4714	21947	-0.0840066	7.04812	0.0269956	0.869492
chr1	1771243	1776487	5245	chr1	1820228	1824568	4341	48533	-0.188226	5.40484	0.058869	0.808293
chr1	1771243	1776487	5245	chr1	1830551	1833838	3288	58329	-0.508685	5.4056	0.418428	0.517722
chr1	1771243	1776487	5245	chr1	1837198	1841609	4412	65538	-0.175018	6.27488	0.0838364	0.772164
chr1	1771243	1776487	5245	chr1	1868118	1870808	2691	95598	-2.91553	3.99592	1.92409	0.165407
chr1	1771243	1776487	5245	chr1	1926881	1928637	1757	153894	0.513182	3.9951	0.0944795	0.758558
chr1	1771243	1776487	5245	chr1	2042114	2045694	3581	270039	-2.09501	3.84509	0.973196	0.323884
chr1	1771243	1776487	5245	chr1	2125478	2127907	2430	352827	-2.09517	3.84518	0.973285	0.323862
chr1	1771243	1776487	5245	chr1	2330581	2333078	2498	557964	-2.09517	3.84518	0.973285	0.323862
chr1	1771243	1776487	5245	chr1	2342909	2346095	3187	570637	-2.09517	3.84518	0.973285	0.323862
chr1	1771243	1776487	5245	chr1	2424097	2429120	5024	652743	2.66682	3.86614	1.9005	0.168022
chr1	1771243	1776487	5245	chr1	2476096	2481428	5333	704897	-2.09501	3.84509	0.973196	0.323884
chr1	1771243	1776487	5245	chr1	2515688	2518612	2925	743285	-2.09517	3.84518	0.973285	0.323862
chr1	1771243	1776487	5245	chr1	3580071	3585990	5920	1809165	2.60836	3.84426	1.8518	0.173574
chr1	1793456	1798169	4714	chr1	1820228	1824568	4341	26585	1.93768	4.92582	4.19876	0.0404535
chr1	1793456	1798169	4714	chr1	1830551	1833838	3288	36382	-4.11784	4.37078	4.6528	0.031003
chr1	1793456	1798169	4714	chr1	1837198	1841609	4412	43591	-0.273662	5.61866	0.141346	0.706947
chr1	1793456	1798169	4714	chr1	2042114	2045694	3581	248091	-2.09517	3.84518	0.973285	0.323862
chr1	1793456	1798169	4714	chr1	2125478	2127907	2430	330880	-2.09517	3.84518	0.973285	0.323862
chr1	1793456	1798169	4714	chr1	2185818	2188841	3024	391517	2.60836	3.84426	1.8518	0.173574
chr1	1793456	1798169	4714	chr1	2322250	2324955	2706	527790	-2.09501	3.84509	0.973196	0.323884
chr1	1793456	1798169	4714	chr1	2342909	2346095	3187	548689	-2.09501	3.84509	0.973196	0.323884
chr1	1793456	1798169	4714	chr1	2476096	2481428	5333	682949	-2.09501	3.84509	0.973196	0.323884
chr1	1793456	1798169	4714	chr1	2485419	2491852	6434	692823	2.60836	3.84426	1.8518	0.173574
chr1	1793456	1798169	4714	chr1	2515688	2518612	2925	721337	-2.09501	3.84509	0.973196	0.323884
chr1	1793456	1798169	4714	chr1	3580071	3585990	5920	1787218	3.47568	3.9942	3.63313	0.0566402
chr1	1820228	1824568	4341	chr1	1830551	1833838	3288	9796	0.572955	4.83057	0.365837	0.545282
chr1	1820228	1824568	4341	chr1	1837198	1841609	4412	17005	-0.891354	4.66528	0.635104	0.425489
chr1	1820228	1824568	4341	chr1	2342909	2346095	3187	522104	-2.09501	3.84509	0.973196	0.323884
chr1	1820228	1824568	4341	chr1	2507996	2510952	2957	687076	-2.09517	3.84518	0.973285	0.323862
chr1	1820228	1824568	4341	chr1	3349663	3352408	2746	1528637	-2.09517	3.84518	0.973285	0.323862
chr1	1830551	1833838	3288	chr1	1837198	1841609	4412	7209	-0.414443	5.64429	0.330537	0.565343
chr1	1830551	1833838	3288	chr1	2322250	2324955	2706	491408	-2.09517	3.84518	0.973285	0.323862
chr1	1830551	1833838	3288	chr1	2476096	2481428	5333	646567	-2.09501	3.84509	0.973196	0.323884
chr1	1830551	1833838	3288	chr1	2515688	2518612	2925	684955	-2.09517	3.84518	0.973285	0.323862
chr1	1830551	1833838	3288	chr1	3580071	3585990	5920	1750836	2.60836	3.84426	1.8518	0.173574
chr1	1837198	1841609	4412	chr1	1926881	1928637	1757	88355	-2.09501	3.84509	0.973196	0.323884
chr1	1837198	1841609	4412	chr1	1980380	1983027	2648	142300	0.513182	3.9951	0.0944795	0.758558
chr1	1837198	1841609	4412	chr1	2042114	2045694	3581	204500	-2.09501	3.84509	0.973196	0.323884
chr1	1837198	1841609	4412	chr1	2125478	2127907	2430	287289	-2.09501	3.84509	0.973196	0.323884
chr1	1837198	1841609	4412	chr1	2322250	2324955	2706	484199	0.571643	4.01684	0.112349	0.737485
chr1	1837198	1841609	4412	chr1	2342909	2346095	3187	505098	-2.09517	3.84518	0.973285	0.323862
chr1	1837198	1841609	4412	chr1	2485419	2491852	6434	649232	-2.09517	3.84518	0.973285	0.323862
chr1	1837198	1841609	4412	chr1	2507996	2510952	2957	670070	-2.91537	3.99583	1.92392	0.165425
chr1	1837198	1841609	4412	chr1	2515688	2518612	2925	677746	2.60836	3.84426	1.8518	0.173574
chr1	1837198	1841609	4412	chr1	2868473	2870791	2319	1030228	2.60836	3.84426	1.8518	0.173574
chr1	1837198	1841609	4412	chr1	3580071	3585990	5920	1743627	2.60836	3.84426	1.8518	0.173574
chr1	1837198	1841609	4412	chr1	3592833	3597063	4231	1755544	-2.09517	3.84518	0.973285	0.323862
chr1	1868118	1870808	2691	chr1	2042114	2045694	3581	174441	-2.09517	3.84518	0.973285	0.323862
chr1	1868118	1870808	2691	chr1	2342909	2346095	3187	475039	-2.09517	3.84518	0.973285	0.323862
chr1	1868118	1870808	2691	chr1	2476096	2481428	5333	609299	-2.09501	3.84509	0.973196	0.323884
chr1	1926881	1928637	1757	chr1	1980380	1983027	2648	53944	0.513182	3.9951	0.0944795	0.758558
chr1	1926881	1928637	1757	chr1	2322250	2324955	2706	395843	-2.09517	3.84518	0.973285	0.323862
chr1	1980380	1983027	2648	chr1	2042114	2045694	3581	62200	-2.91569	3.99601	1.92426	0.165388
chr1	1980380	1983027	2648	chr1	2507996	2510952	2957	527770	0.51335	3.99501	0.0945291	0.758496
chr1	1980380	1983027	2648	chr1	2515688	2518612	2925	535446	0.513182	3.9951	0.0944795	0.758558
chr1	1980380	1983027	2648	chr1	3580071	3585990	5920	1601327	-2.09517	3.84518	0.973285	0.323862
chr1	2042114	2045694	3581	chr1	2125478	2127907	2430	82788	2.60836	3.84426	1.8518	0.173574
chr1	2042114	2045694	3581	chr1	2208875	2212030	3156	166548	-2.09517	3.84518	0.973285	0.323862
chr1	2042114	2045694	3581	chr1	2476096	2481428	5333	434858	-2.09517	3.84518	0.973285	0.323862
chr1	2042114	2045694	3581	chr1	2507996	2510952	2957	465570	2.60836	3.84426	1.8518	0.173574
chr1	2042114	2045694	3581	chr1	2515688	2518612	2925	473246	-2.09517	3.84518	0.973285	0.323862
chr1	2042114	2045694	3581	chr1	3512860	3517578	4719	1471315	-2.09501	3.84509	0.973196	0.323884
chr1	2125478	2127907	2430	chr1	2185818	2188841	3024	60637	2.60836	3.84426	1.8518	0.173574
chr1	2125478	2127907	2430	chr1	2208875	2212030	3156	83760	-2.09501	3.84509	0.973196	0.323884
chr1	2125478	2127907	2430	chr1	2322250	2324955	2706	196910	0.513182	3.9951	0.0944795	0.758558
chr1	2125478	2127907	2430	chr1	2342909	2346095	3187	217809	-2.09517	3.84518	0.973285	0.323862
chr1	2125478	2127907	2430	chr1	2424097	2429120	5024	299916	-2.09501	3.84509	0.973196	0.323884
chr1	2125478	2127907	2430	chr1	2476096	2481428	5333	352069	-0.768569	4.2772	0.288986	0.590871
chr1	2125478	2127907	2430	chr1	2507996	2510952	2957	382781	-2.09517	3.84518	0.973285	0.323862
chr1	2125478	2127907	2430	chr1	3580071	3585990	5920	1456338	-2.09517	3.84518	0.973285	0.323862
chr1	2185818	2188841	3024	chr1	2208875	2212030	3156	23123	2.60836	3.84426	1.8518	0.173574
chr1	2185818	2188841	3024	chr1	2322250	2324955	2706	136273	-2.09517	3.84518	0.973285	0.323862
chr1	2185818	2188841	3024	chr1	2330581	2333078	2498	144500	2.60836	3.84426	1.8518	0.173574
chr1	2185818	2188841	3024	chr1	2424097	2429120	5024	239279	-2.09517	3.84518	0.973285	0.323862
chr1	2185818	2188841	3024	chr1	2507996	2510952	2957	322144	2.60836	3.84426	1.8518	0.173574
chr1	2185818	2188841	3024	chr1	3580071	3585990	5920	1395701	2.60836	3.84426	1.8518	0.173574
chr1	2185818	2188841	3024	chr1	3818201	3822234	4034	1632888	-2.09501	3.84509	0.973196	0.323884
chr1	2322250	2324955	2706	chr1	2330581	2333078	2498	8227	1.09209	4.36837	0.787884	0.374741
chr1	2322250	2324955	2706	chr1	2342909	2346095	3187	20899	-1.60021	4.98277	2.42499	0.119414
chr1	2322250	2324955	2706	chr1	2424097	2429120	5024	103006	-2.09517	3.84518	0.973285	0.323862
chr1	2322250	2324955	2706	chr1	2476096	2481428	5333	155159	0.0402943	4.36923	0.00112977	0.973186
chr1	2322250	2324955	2706	chr1	2485419	2491852	6434	165033	0.559985	4.25496	0.176586	0.674324
chr1	2322250	2324955	2706	chr1	2507996	2510952	2957	185871	3.47568	3.9942	3.63313	0.0566402
chr1	2322250	2324955	2706	chr1	2515688	2518612	2925	193547	-2.91569	3.99601	1.92426	0.165388
chr1	2330581	2333078	2498	chr1	2342909	2346095	3187	12672	0.0406104	4.36906	0.00114537	0.973002
chr1	2330581	2333078	2498	chr1	2476096	2481428	5333	146932	1.09193	4.36845	0.787669	0.374806
chr1	2330581	2333078	2498	chr1	2485419	2491852	6434	156806	2.60836	3.84426	1.8518	0.173574
chr1	2330581	2333078	2498	chr1	2515688	2518612	2925	185320	2.60836	3.84426	1.8518	0.173574
chr1	2330581	2333078	2498	chr1	3823388	3828922	5535	1494325	2.60836	3.84426	1.8518	0.173574
chr1	2342909	2346095	3187	chr1	2424097	2429120	5024	82106	-2.09501	3.84509	0.973196	0.323884
chr1	2342909	2346095	3187	chr1	2476096	2481428	5333	134260	-0.300636	5.45613	0.154852	0.693941
chr1	2342909	2346095	3187	chr1	2485419	2491852	6434	144133	0.572552	4.47401	0.248493	0.618138
chr1	2342909	2346095	3187	chr1	2507996	2510952	2957	164972	4.00762	4.12967	5.3496	0.020727
chr1	2342909	2346095	3187	chr1	2515688	2518612	2925	172648	-0.11007	4.66439	0.0104996	0.918386
chr1	2342909	2346095	3187	chr1	2583251	2589641	6391	241944	2.60836	3.84426	1.8518	0.173574
chr1	2342909	2346095	3187	chr1	2876156	2878253	2098	532702	2.60836	3.84426	1.8518	0.173574
chr1	2342909	2346095	3187	chr1	3086303	3089275	2973	743287	2.60836	3.84426	1.8518	0.173574
chr1	2342909	2346095	3187	chr1	3136633	3140314	3682	793971	-2.09501	3.84509	0.973196	0.323884
chr1	2342909	2346095	3187	chr1	3512860	3517578	4719	1170717	-2.09517	3.84518	0.973285	0.323862
chr1	2342909	2346095	3187	chr1	3580071	3585990	5920	1238528	-2.09501	3.84509	0.973196	0.323884
chr1	2342909	2346095	3187	chr1	3609221	3613038	3818	1266627	2.60836	3.84426	1.8518	0.173574
chr1	2342909	2346095	3187	chr1	4103577	4109107	5531	1761840	-2.09517	3.84518	0.973285	0.323862
chr1	2424097	2429120	5024	chr1	2476096	2481428	5333	52153	-0.341239	4.4751	0.0807869	0.776234
chr1	2424097	2429120	5024	chr1	2485419	2491852	6434	62027	-0.826872	4.25566	0.330286	0.565491
chr1	2424097	2429120	5024	chr1	2515688	2518612	2925	90541	0.51335	3.99501	0.0945291	0.758496
chr1	2424097	2429120	5024	chr1	3818201	3822234	4034	1393609	-2.09501	3.84509	0.973196	0.323884
chr1	2476096	2481428	5333	chr1	2485419	2491852	6434	9873	-1.92649	5.86978	6.09263	0.0135747
chr1	2476096	2481428	5333	chr1	2507996	2510952	2957	30712	0.568661	4.97994	0.413057	0.520422
chr1	2476096	2481428	5333	chr1	2515688	2518612	2925	38388	-0.593697	5.59982	0.644915	0.421937
chr1	2476096	2481428	5333	chr1	2583251	2589641	6391	107684	2.60836	3.84426	1.8518	0.173574
chr1	2476096	2481428	5333	chr1	3086303	3089275	2973	609027	2.60836	3.84426	1.8518	0.173574
chr1	2476096	2481428	5333	chr1	3207352	3208953	1602	729390	2.60836	3.84426	1.8518	0.173574
chr1	2476096	2481428	5333	chr1	3592833	3597063	4231	1116186	-2.91569	3.99601	1.92426	0.165388
chr1	2476096	2481428	5333	chr1	3609221	3613038	3818	1132367	-2.09517	3.84518	0.973285	0.323862
chr1	2476096	2481428	5333	chr1	3818201	3822234	4034	1341455	-2.09517	3.84518	0.973285	0.323862
chr1	2476096	2481428	5333	chr1	4130163	4132119	1957	1652379	-2.09517	3.84518	0.973285	0.323862
chr1	2476096	2481428	5333	chr1	4368291	4373525	5235	1892146	2.60836	3.84426	1.8518	0.173574
chr1	2485419	2491852	6434	chr1	2507996	2510952	2957	20838	-0.395411	5.35187	0.246335	0.619667
chr1	2485419	2491852	6434	chr1	2515688	2518612	2925	28514	-1.97112	4.6661	2.47947	0.115341
chr1	2485419	2491852	6434	chr1	2583251	2589641	6391	97810	-2.09501	3.84509	0.973196	0.323884
chr1	2485419	2491852	6434	chr1	2876156	2878253	2098	388569	-2.09501	3.84509	0.973196	0.323884
chr1	2485419	2491852	6434	chr1	2956703	2958169	1467	468800	2.60836	3.84426	1.8518	0.173574
chr1	2485419	2491852	6434	chr1	4103577	4109107	5531	1617706	-2.09501	3.84509	0.973196	0.323884
chr1	2507996	2510952	2957	chr1	2515688	2518612	2925	7676	-0.701159	6.07717	1.15871	0.281732
chr1	2507996	2510952	2957	chr1	3580071	3585990	5920	1073556	2.66682	3.86614	1.9005	0.168022
chr1	2507996	2510952	2957	chr1	3823388	3828922	5535	1316681	2.60836	3.84426	1.8518	0.173574
chr1	2507996	2510952	2957	chr1	4085790	4089396	3607	1578119	-2.09517	3.84518	0.973285	0.323862
chr1	2515688	2518612	2925	chr1	2583251	2589641	6391	69296	0.51335	3.99501	0.0945291	0.758496
chr1	2515688	2518612	2925	chr1	2868473	2870791	2319	352482	2.60836	3.84426	1.8518	0.173574
chr1	2515688	2518612	2925	chr1	3188757	3190610	1854	672533	-2.09501	3.84509	0.973196	0.323884
chr1	2515688	2518612	2925	chr1	3349663	3352408	2746	833885	-2.09501	3.84509	0.973196	0.323884
chr1	2515688	2518612	2925	chr1	3580071	3585990	5920	1065880	2.60836	3.84426	1.8518	0.173574
chr1	2515688	2518612	2925	chr1	3592833	3597063	4231	1077798	-2.09501	3.84509	0.973196	0.323884
chr1	2515688	2518612	2925	chr1	3823388	3828922	5535	1309005	-2.09517	3.84518	0.973285	0.323862
chr1	2515688	2518612	2925	chr1	4103577	4109107	5531	1589192	-2.09517	3.84518	0.973285	0.323862
chr1	2868473	2870791	2319	chr1	2876156	2878253	2098	7572	-0.82703	4.25575	0.330401	0.565423
chr1	2868473	2870791	2319	chr1	2956703	2958169	1467	87804	-2.09501	3.84509	0.973196	0.323884
chr1	2868473	2870791	2319	chr1	3580071	3585990	5920	713398	-2.09501	3.84509	0.973196	0.323884
chr1	2868473	2870791	2319	chr1	3634945	3637593	2649	766637	2.66682	3.86614	1.9005	0.168022
chr1	2868473	2870791	2319	chr1	4085790	4089396	3607	1217961	2.60836	3.84426	1.8518	0.173574
chr1	2876156	2878253	2098	chr1	3136633	3140314	3682	261269	2.60836	3.84426	1.8518	0.173574
chr1	2956703	2958169	1467	chr1	3258609	3260442	1834	302089	-2.09501	3.84509	0.973196	0.323884
chr1	2956703	2958169	1467	chr1	4368291	4373525	5235	1413472	2.60836	3.84426	1.8518	0.173574
chr1	2956703	2958169	1467	chr1	4478194	4479867	1674	1521594	-2.09501	3.84509	0.973196	0.323884
chr1	3086303	3089275	2973	chr1	3136633	3140314	3682	50684	-2.09517	3.84518	0.973285	0.323862
chr1	3086303	3089275	2973	chr1	3692430	3693851	1422	605351	-2.09501	3.84509	0.973196	0.323884
chr1	3086303	3089275	2973	chr1	4085790	4089396	3607	999804	-2.09517	3.84518	0.973285	0.323862
chr1	3086303	3089275	2973	chr1	4368291	4373525	5235	1283119	2.60836	3.84426	1.8518	0.173574
chr1	3136633	3140314	3682	chr1	3580071	3585990	5920	444557	0.513182	3.9951	0.0944795	0.758558
chr1	3136633	3140314	3682	chr1	4430853	4432433	1581	1293169	-2.09517	3.84518	0.973285	0.323862
chr1	3188757	3190610	1854	chr1	3207352	3208953	1602	18469	2.60836	3.84426	1.8518	0.173574
chr1	3188757	3190610	1854	chr1	3580071	3585990	5920	393347	-2.09517	3.84518	0.973285	0.323862
chr1	3349663	3352408	2746	chr1	3580071	3585990	5920	231995	2.60836	3.84426	1.8518	0.173574
chr1	3349663	3352408	2746	chr1	4854304	4858302	3999	1505267	-2.09501	3.84509	0.973196	0.323884
chr1	3349663	3352408	2746	chr1	5289861	5292478	2618	1940134	2.60836	3.84426	1.8518	0.173574
chr1	3512860	3517578	4719	chr1	3580071	3585990	5920	67811	-2.91537	3.99583	1.92392	0.165425
chr1	3512860	3517578	4719	chr1	3592833	3597063	4231	79729	2.60836	3.84426	1.8518	0.173574
chr1	3580071	3585990	5920	chr1	3592833	3597063	4231	11917	0.33308	6.31069	0.328485	0.566552
chr1	3580071	3585990	5920	chr1	3609221	3613038	3818	28099	-0.073978	5.0499	0.00677251	0.934412
chr1	3580071	3585990	5920	chr1	3634945	3637593	2649	53238	-0.307176	4.13137	0.0400325	0.841417
chr1	3580071	3585990	5920	chr1	3659008	3660572	1565	76759	1.09193	4.36845	0.787669	0.374806
chr1	3580071	3585990	5920	chr1	3692430	3693851	1422	110110	-2.91553	3.99592	1.92409	0.165407
chr1	3580071	3585990	5920	chr1	3712111	3714336	2226	130193	-0.307176	4.13137	0.0400325	0.841417
chr1	3580071	3585990	5920	chr1	3773167	3776893	3727	191999	-3.43554	4.13234	2.85402	0.0911457
chr1	3580071	3585990	5920	chr1	3818201	3822234	4034	237187	-0.82703	4.25575	0.330401	0.565423
chr1	3580071	3585990	5920	chr1	3823388	3828922	5535	243124	0.560311	4.25479	0.176769	0.674165
chr1	3580071	3585990	5920	chr1	4085790	4089396	3607	504562	-2.91553	3.99592	1.92409	0.165407
chr1	3580071	3585990	5920	chr1	4103577	4109107	5531	523311	-0.307176	4.13137	0.0400325	0.841417
chr1	3580071	3585990	5920	chr1	4117759	4119964	2206	535831	2.60836	3.84426	1.8518	0.173574
chr1	3580071	3585990	5920	chr1	4368291	4373525	5235	787877	-2.09501	3.84509	0.973196	0.323884
chr1	3580071	3585990	5920	chr1	4386319	4389243	2925	804750	2.60836	3.84426	1.8518	0.173574
chr1	3580071	3585990	5920	chr1	4854304	4858302	3999	1273272	-2.09501	3.84509	0.973196	0.323884
chr1	3580071	3585990	5920	chr1	4889467	4891868	2402	1307637	2.66682	3.86614	1.9005	0.168022
chr1	3580071	3585990	5920	chr1	5344541	5347392	2852	1762936	-2.09501	3.84509	0.973196	0.323884
chr1	3592833	3597063	4231	chr1	3609221	3613038	3818	16181	1.38051	4.13056	0.870365	0.350854
chr1	3592833	3597063	4231	chr1	3659008	3660572	1565	64842	2.66682	3.86614	1.9005	0.168022
chr1	3592833	3597063	4231	chr1	3692430	3693851	1422	98192	-2.09517	3.84518	0.973285	0.323862
chr1	3592833	3597063	4231	chr1	3818201	3822234	4034	225269	-2.09517	3.84518	0.973285	0.323862
chr1	3592833	3597063	4231	chr1	3823388	3828922	5535	231207	-2.09517	3.84518	0.973285	0.323862
chr1	3592833	3597063	4231	chr1	4368291	4373525	5235	775960	-2.09501	3.84509	0.973196	0.323884
chr1	3609221	3613038	3818	chr1	4430853	4432433	1581	820513	2.60836	3.84426	1.8518	0.173574
chr1	3634945	3637593	2649	chr1	3692430	3693851	1422	56871	-2.09517	3.84518	0.973285	0.323862
chr1	3634945	3637593	2649	chr1	3712111	3714336	2226	76954	-2.09501	3.84509	0.973196	0.323884
chr1	3634945	3637593	2649	chr1	4403344	4405272	1929	768039	-2.09501	3.84509	0.973196	0.323884
chr1	3659008	3660572	1565	chr1	3773167	3776893	3727	115240	3.47568	3.9942	3.63313	0.0566402
chr1	3659008	3660572	1565	chr1	3823388	3828922	5535	166365	2.60836	3.84426	1.8518	0.173574
chr1	3659008	3660572	1565	chr1	4368291	4373525	5235	711118	-2.09501	3.84509	0.973196	0.323884
chr1	3659008	3660572	1565	chr1	5507668	5510995	3328	1849541	-2.09517	3.84518	0.973285	0.323862
chr1	3692430	3693851	1422	chr1	3712111	3714336	2226	20083	0.560311	4.25479	0.176769	0.674165
chr1	3692430	3693851	1422	chr1	3818201	3822234	4034	127077	0.51335	3.99501	0.0945291	0.758496
chr1	3692430	3693851	1422	chr1	3823388	3828922	5535	133014	-3.43523	4.13217	2.85353	0.0911734
chr1	3692430	3693851	1422	chr1	4103577	4109107	5531	413201	-2.09501	3.84509	0.973196	0.323884
chr1	3692430	3693851	1422	chr1	4368291	4373525	5235	677767	-2.91553	3.99592	1.92409	0.165407
chr1	3712111	3714336	2226	chr1	3773167	3776893	3727	61806	-1.20841	4.37008	0.774039	0.37897
chr1	3712111	3714336	2226	chr1	3818201	3822234	4034	106994	-1.2081	4.36992	0.773664	0.379086
chr1	3712111	3714336	2226	chr1	3823388	3828922	5535	112931	-3.81661	4.25654	3.76297	0.0523995
chr1	3712111	3714336	2226	chr1	4085790	4089396	3607	374369	0.0404524	4.36914	0.00113756	0.973094
chr1	3712111	3714336	2226	chr1	4103577	4109107	5531	393118	2.60836	3.84426	1.8518	0.173574
chr1	3712111	3714336	2226	chr1	4368291	4373525	5235	657684	2.60836	3.84426	1.8518	0.173574
chr1	3712111	3714336	2226	chr1	5344541	5347392	2852	1632743	2.60836	3.84426	1.8518	0.173574
chr1	3773167	3776893	3727	chr1	3818201	3822234	4034	45187	-1.97098	4.66602	2.4791	0.115368
chr1	3773167	3776893	3727	chr1	3823388	3828922	5535	51125	-0.756865	4.90907	0.596759	0.439817
chr1	3773167	3776893	3727	chr1	4085790	4089396	3607	312563	-0.82703	4.25575	0.330401	0.565423
chr1	3773167	3776893	3727	chr1	4117759	4119964	2206	343831	-2.09501	3.84509	0.973196	0.323884
chr1	3773167	3776893	3727	chr1	4200705	4202504	1800	426574	0.51335	3.99501	0.0945291	0.758496
chr1	3773167	3776893	3727	chr1	4368291	4373525	5235	595878	0.51335	3.99501	0.0945291	0.758496
chr1	3818201	3822234	4034	chr1	3823388	3828922	5535	5937	-0.264831	6.89761	0.251939	0.615713
chr1	3818201	3822234	4034	chr1	4012176	4015095	2920	193418	-2.91569	3.99601	1.92426	0.165388
chr1	3818201	3822234	4034	chr1	4030840	4032167	1328	211286	-2.09517	3.84518	0.973285	0.323862
chr1	3818201	3822234	4034	chr1	4085790	4089396	3607	267375	-0.537272	5.05051	0.352047	0.552956
chr1	3818201	3822234	4034	chr1	4093948	4095642	1695	274577	-2.91569	3.99601	1.92426	0.165388
chr1	3818201	3822234	4034	chr1	4103577	4109107	5531	286124	-1.45275	4.90977	1.93117	0.164631
chr1	3818201	3822234	4034	chr1	4117759	4119964	2206	298644	-2.91553	3.99592	1.92409	0.165407
chr1	3818201	3822234	4034	chr1	4122364	4124194	1831	303061	-2.09501	3.84509	0.973196	0.323884
chr1	3818201	3822234	4034	chr1	4368291	4373525	5235	550690	0.0404524	4.36914	0.00113756	0.973094
chr1	3818201	3822234	4034	chr1	4386319	4389243	2925	567563	2.60836	3.84426	1.8518	0.173574
chr1	3818201	3822234	4034	chr1	4403344	4405272	1929	584090	-2.91553	3.99592	1.92409	0.165407
chr1	3818201	3822234	4034	chr1	4854304	4858302	3999	1036085	2.60836	3.84426	1.8518	0.173574
chr1	3818201	3822234	4034	chr1	5279062	5282592	3531	1460609	1.38067	4.13048	0.870548	0.350804
chr1	3823388	3828922	5535	chr1	4012176	4015095	2920	187480	-2.91569	3.99601	1.92426	0.165388
chr1	3823388	3828922	5535	chr1	4030840	4032167	1328	205348	-0.110368	4.66455	0.0105547	0.918172
chr1	3823388	3828922	5535	chr1	4085790	4089396	3607	261438	0.31395	5.80575	0.217172	0.641203
chr1	3823388	3828922	5535	chr1	4093948	4095642	1695	268640	2.29616	4.36751	3.13838	0.0764697
chr1	3823388	3828922	5535	chr1	4103577	4109107	5531	280187	1.0412	5.86238	2.53579	0.111291
chr1	3823388	3828922	5535	chr1	4117759	4119964	2206	292706	0.574398	4.66381	0.310698	0.577252
chr1	3823388	3828922	5535	chr1	4122364	4124194	1831	297124	0.560148	4.25488	0.176678	0.674244
chr1	3823388	3828922	5535	chr1	4130163	4132119	1957	304986	-4.11799	4.37086	4.65317	0.0309962
chr1	3823388	3828922	5535	chr1	4178687	4180859	2173	353618	2.60836	3.84426	1.8518	0.173574
chr1	3823388	3828922	5535	chr1	4221357	4222672	1316	395859	0.559985	4.25496	0.176586	0.674324
chr1	3823388	3828922	5535	chr1	4368291	4373525	5235	544753	-0.0875999	5.25827	0.0114233	0.914884
chr1	3823388	3828922	5535	chr1	4386319	4389243	2925	561626	1.38067	4.13048	0.870548	0.350804
chr1	3823388	3828922	5535	chr1	4403344	4405272	1929	578153	2.60836	3.84426	1.8518	0.173574
chr1	3823388	3828922	5535	chr1	4430853	4432433	1581	605488	0.51335	3.99501	0.0945291	0.758496
chr1	3823388	3828922	5535	chr1	4614027	4615499	1473	788608	2.60836	3.84426	1.8518	0.173574
chr1	3823388	3828922	5535	chr1	4676653	4678992	2340	851667	4.00762	4.12967	5.3496	0.020727
chr1	3823388	3828922	5535	chr1	4889467	4891868	2402	1064512	-2.91569	3.99601	1.92426	0.165388
chr1	3823388	3828922	5535	chr1	4933513	4935132	1620	1108167	-2.09501	3.84509	0.973196	0.323884
chr1	3823388	3828922	5535	chr1	5279062	5282592	3531	1454672	-2.09501	3.84509	0.973196	0.323884
chr1	3823388	3828922	5535	chr1	5289861	5292478	2618	1465014	2.60836	3.84426	1.8518	0.173574
chr1	3823388	3828922	5535	chr1	5344541	5347392	2852	1519811	2.60836	3.84426	1.8518	0.173574
chr1	3823388	3828922	5535	chr1	5507668	5510995	3328	1683176	-2.09517	3.84518	0.973285	0.323862
chr1	4012176	4015095	2920	chr1	4030840	4032167	1328	17868	-2.09517	3.84518	0.973285	0.323862
chr1	4012176	4015095	2920	chr1	4085790	4089396	3607	73957	0.560311	4.25479	0.176769	0.674165
chr1	4012176	4015095	2920	chr1	4103577	4109107	5531	92706	2.60836	3.84426	1.8518	0.173574
chr1	4012176	4015095	2920	chr1	4117759	4119964	2206	105226	-2.09501	3.84509	0.973196	0.323884
chr1	4012176	4015095	2920	chr1	4368291	4373525	5235	357272	-2.09517	3.84518	0.973285	0.323862
chr1	4030840	4032167	1328	chr1	4085790	4089396	3607	56089	-2.09501	3.84509	0.973196	0.323884
chr1	4030840	4032167	1328	chr1	4103577	4109107	5531	74838	-0.307176	4.13137	0.0400325	0.841417
chr1	4030840	4032167	1328	chr1	4117759	4119964	2206	87358	-2.09501	3.84509	0.973196	0.323884
chr1	4030840	4032167	1328	chr1	4130163	4132119	1957	99637	-2.91553	3.99592	1.92409	0.165407
chr1	4030840	4032167	1328	chr1	4200705	4202504	1800	170101	-2.09501	3.84509	0.973196	0.323884
chr1	4030840	4032167	1328	chr1	4368291	4373525	5235	339404	2.60836	3.84426	1.8518	0.173574
chr1	4085790	4089396	3607	chr1	4093948	4095642	1695	7202	0.721341	5.52287	0.988007	0.32023
chr1	4085790	4089396	3607	chr1	4103577	4109107	5531	18749	-0.570164	6.79424	1.11606	0.290769
chr1	4085790	4089396	3607	chr1	4117759	4119964	2206	31268	-1.85584	5.11791	3.45817	0.0629398
chr1	4085790	4089396	3607	chr1	4122364	4124194	1831	35686	-1.20841	4.37008	0.774039	0.37897
chr1	4085790	4089396	3607	chr1	4130163	4132119	1957	43548	-2.91553	3.99592	1.92409	0.165407
chr1	4085790	4089396	3607	chr1	4178687	4180859	2173	92180	2.60836	3.84426	1.8518	0.173574
chr1	4085790	4089396	3607	chr1	4200705	4202504	1800	114011	-2.09501	3.84509	0.973196	0.323884
chr1	4085790	4089396	3607	chr1	4368291	4373525	5235	283315	0.572657	4.83072	0.365473	0.545482
chr1	4085790	4089396	3607	chr1	4386319	4389243	2925	300188	2.60836	3.84426	1.8518	0.173574
chr1	4085790	4089396	3607	chr1	4676653	4678992	2340	590229	2.60836	3.84426	1.8518	0.173574
chr1	4085790	4089396	3607	chr1	4854304	4858302	3999	768710	-2.09517	3.84518	0.973285	0.323862
chr1	4085790	4089396	3607	chr1	5279062	5282592	3531	1193234	2.60836	3.84426	1.8518	0.173574
chr1	4085790	4089396	3607	chr1	5739805	5741698	1894	1653158	2.60836	3.84426	1.8518	0.173574
chr1	4085790	4089396	3607	chr1	6084239	6089293	5055	1999173	-2.09517	3.84518	0.973285	0.323862
chr1	4093948	4095642	1695	chr1	4103577	4109107	5531	11547	0.215246	5.23781	0.0726616	0.7875
chr1	4093948	4095642	1695	chr1	4117759	4119964	2206	24066	0.51335	3.99501	0.0945291	0.758496
chr1	4093948	4095642	1695	chr1	4122364	4124194	1831	28484	-2.09501	3.84509	0.973196	0.323884
chr1	4093948	4095642	1695	chr1	4130163	4132119	1957	36346	0.513182	3.9951	0.0944795	0.758558
chr1	4093948	4095642	1695	chr1	4368291	4373525	5235	276113	2.60836	3.84426	1.8518	0.173574
chr1	4093948	4095642	1695	chr1	4676653	4678992	2340	583027	2.60836	3.84426	1.8518	0.173574
chr1	4103577	4109107	5531	chr1	4117759	4119964	2206	12519	-0.395411	5.35187	0.246335	0.619667
chr1	4103577	4109107	5531	chr1	4122364	4124194	1831	16937	0.513182	3.9951	0.0944795	0.758558
chr1	4103577	4109107	5531	chr1	4130163	4132119	1957	24799	-3.43539	4.13226	2.85378	0.0911595
chr1	4103577	4109107	5531	chr1	4178687	4180859	2173	73431	-2.91537	3.99583	1.92392	0.165425
chr1	4103577	4109107	5531	chr1	4200705	4202504	1800	95262	-3.81661	4.25654	3.76297	0.0523995
chr1	4103577	4109107	5531	chr1	4221357	4222672	1316	115672	-0.826714	4.25558	0.33017	0.565559
chr1	4103577	4109107	5531	chr1	4368291	4373525	5235	264566	0.0404524	4.36914	0.00113756	0.973094
chr1	4103577	4109107	5531	chr1	4386319	4389243	2925	281439	2.60836	3.84426	1.8518	0.173574
chr1	4103577	4109107	5531	chr1	4403344	4405272	1929	297966	-2.09517	3.84518	0.973285	0.323862
chr1	4103577	4109107	5531	chr1	4910110	4912598	2489	805012	2.60836	3.84426	1.8518	0.173574
chr1	4103577	4109107	5531	chr1	5279062	5282592	3531	1174485	0.51335	3.99501	0.0945291	0.758496
chr1	4103577	4109107	5531	chr1	5289861	5292478	2618	1184827	2.60836	3.84426	1.8518	0.173574
chr1	4103577	4109107	5531	chr1	6084239	6089293	5055	1980424	-2.09501	3.84509	0.973196	0.323884
chr1	4117759	4119964	2206	chr1	4130163	4132119	1957	12279	-2.91553	3.99592	1.92409	0.165407
chr1	4117759	4119964	2206	chr1	4854304	4858302	3999	737441	-2.09501	3.84509	0.973196	0.323884
chr1	4122364	4124194	1831	chr1	4130163	4132119	1957	7862	-2.09517	3.84518	0.973285	0.323862
chr1	4122364	4124194	1831	chr1	5279062	5282592	3531	1157548	-2.09501	3.84509	0.973196	0.323884
chr1	4122364	4124194	1831	chr1	5352846	5354433	1588	1230360	2.60836	3.84426	1.8518	0.173574
chr1	4130163	4132119	1957	chr1	4178687	4180859	2173	48632	-2.09517	3.84518	0.973285	0.323862
chr1	4130163	4132119	1957	chr1	4368291	4373525	5235	239767	2.66682	3.86614	1.9005	0.168022
chr1	4130163	4132119	1957	chr1	4430853	4432433	1581	300502	-2.09517	3.84518	0.973285	0.323862
chr1	4130163	4132119	1957	chr1	5289861	5292478	2618	1160028	2.66682	3.86614	1.9005	0.168022
chr1	4178687	4180859	2173	chr1	4200705	4202504	1800	21831	-2.09517	3.84518	0.973285	0.323862
chr1	4178687	4180859	2173	chr1	4368291	4373525	5235	191135	-2.09501	3.84509	0.973196	0.323884
chr1	4178687	4180859	2173	chr1	4478194	4479867	1674	299257	-2.09501	3.84509	0.973196	0.323884
chr1	4200705	4202504	1800	chr1	4221357	4222672	1316	20410	0.51335	3.99501	0.0945291	0.758496
chr1	4200705	4202504	1800	chr1	4368291	4373525	5235	169303	-2.09517	3.84518	0.973285	0.323862
chr1	4200705	4202504	1800	chr1	4386319	4389243	2925	186176	-2.09501	3.84509	0.973196	0.323884
chr1	4221357	4222672	1316	chr1	4368291	4373525	5235	148893	2.60836	3.84426	1.8518	0.173574
chr1	4221357	4222672	1316	chr1	4676653	4678992	2340	455808	-2.09501	3.84509	0.973196	0.323884
chr1	4368291	4373525	5235	chr1	4386319	4389243	2925	16873	1.47579	4.47325	1.61473	0.203828
chr1	4368291	4373525	5235	chr1	4403344	4405272	1929	33400	-4.11784	4.37078	4.6528	0.031003
chr1	4368291	4373525	5235	chr1	4430853	4432433	1581	60735	-0.826872	4.25566	0.330286	0.565491
chr1	4368291	4373525	5235	chr1	4854304	4858302	3999	485395	-0.826872	4.25566	0.330286	0.565491
chr1	4368291	4373525	5235	chr1	4933513	4935132	1620	563414	-2.09517	3.84518	0.973285	0.323862
chr1	4368291	4373525	5235	chr1	5279062	5282592	3531	909919	-2.09517	3.84518	0.973285	0.323862
chr1	4368291	4373525	5235	chr1	6084239	6089293	5055	1715858	2.60836	3.84426	1.8518	0.173574
chr1	4368291	4373525	5235	chr1	6258289	6261264	2976	1888868	-2.09517	3.84518	0.973285	0.323862
chr1	4386319	4389243	2925	chr1	4403344	4405272	1929	16527	0.51335	3.99501	0.0945291	0.758496
chr1	4386319	4389243	2925	chr1	4933513	4935132	1620	546541	-2.09517	3.84518	0.973285	0.323862
chr1	4386319	4389243	2925	chr1	5279062	5282592	3531	893046	-2.91553	3.99592	1.92409	0.165407
chr1	4430853	4432433	1581	chr1	4478194	4479867	1674	47387	2.60836	3.84426	1.8518	0.173574
chr1	4430853	4432433	1581	chr1	5352846	5354433	1588	921996	2.60836	3.84426	1.8518	0.173574
chr1	4614027	4615499	1473	chr1	4854304	4858302	3999	241540	2.60836	3.84426	1.8518	0.173574
chr1	4614027	4615499	1473	chr1	5352846	5354433	1588	738876	-2.09517	3.84518	0.973285	0.323862
chr1	4854304	4858302	3999	chr1	4889467	4891868	2402	34364	-2.09501	3.84509	0.973196	0.323884
chr1	4854304	4858302	3999	chr1	4910110	4912598	2489	55051	-2.09501	3.84509	0.973196	0.323884
chr1	4854304	4858302	3999	chr1	5279062	5282592	3531	424524	-2.09501	3.84509	0.973196	0.323884
chr1	4889467	4891868	2402	chr1	4910110	4912598	2489	20686	-2.09517	3.84518	0.973285	0.323862
chr1	4889467	4891868	2402	chr1	5279062	5282592	3531	390159	-2.09517	3.84518	0.973285	0.323862
chr1	4889467	4891868	2402	chr1	6084239	6089293	5055	1196098	2.60836	3.84426	1.8518	0.173574
chr1	4910110	4912598	2489	chr1	5279062	5282592	3531	369473	2.60836	3.84426	1.8518	0.173574
chr1	5279062	5282592	3531	chr1	5289861	5292478	2618	10342	1.91245	4.25409	1.94741	0.162866
chr1	5279062	5282592	3531	chr1	5570609	5571931	1323	290443	2.60836	3.84426	1.8518	0.173574
chr1	5279062	5282592	3531	chr1	5684098	5685490	1393	403967	-2.09501	3.84509	0.973196	0.323884
chr1	5289861	5292478	2618	chr1	5344541	5347392	2852	54797	2.60836	3.84426	1.8518	0.173574
chr1	5344541	5347392	2852	chr1	5352846	5354433	1588	7673	-2.09501	3.84509	0.973196	0.323884
chr1	5352846	5354433	1588	chr1	5684098	5685490	1393	331154	2.60836	3.84426	1.8518	0.173574
chr1	5507668	5510995	3328	chr1	5545127	5548302	3176	37383	0.513182	3.9951	0.0944795	0.758558
chr1	5507668	5510995	3328	chr1	5570609	5571931	1323	61938	-2.09501	3.84509	0.973196	0.323884
chr1	5545127	5548302	3176	chr1	5570609	5571931	1323	24555	-2.09501	3.84509	0.973196	0.323884
chr1	5545127	5548302	3176	chr1	5739805	5741698	1894	194037	2.60836	3.84426	1.8518	0.173574
chr1	5570609	5571931	1323	chr1	6258289	6261264	2976	688506	-2.09501	3.84509	0.973196	0.323884
chr1	5971162	5972390	1229	chr1	6050953	6055868	4916	81634	-2.09517	3.84518	0.973285	0.323862
chr1	6012523	6014482	1960	chr1	6050953	6055868	4916	39908	-2.09501	3.84509	0.973196	0.323884
chr1	6012523	6014482	1960	chr1	6393489	6395463	1975	380973	-2.09501	3.84509	0.973196	0.323884
chr1	6050953	6055868	4916	chr1	6068456	6070174	1719	15904	2.29616	4.36751	3.13838	0.0764697
chr1	6050953	6055868	4916	chr1	6084239	6089293	5055	33355	0.625901	4.85119	0.432046	0.510987
chr1	6050953	6055868	4916	chr1	6258289	6261264	2976	206366	2.60836	3.84426	1.8518	0.173574
chr1	6050953	6055868	4916	chr1	6451765	6456407	4643	400675	-2.91553	3.99592	1.92409	0.165407
chr1	6050953	6055868	4916	chr1	6835405	6838836	3432	783710	-2.09517	3.84518	0.973285	0.323862
chr1	6068456	6070174	1719	chr1	6084239	6089293	5055	17451	-1.75882	4.57419	1.87497	0.170907
chr1	6068456	6070174	1719	chr1	6835405	6838836	3432	767805	-2.09501	3.84509	0.973196	0.323884
chr1	6084239	6089293	5055	chr1	6258289	6261264	2976	173010	-2.91553	3.99592	1.92409	0.165407
chr1	6084239	6089293	5055	chr1	6393489	6395463	1975	307710	-2.09501	3.84509	0.973196	0.323884
chr1	6084239	6089293	5055	chr1	6451765	6456407	4643	367320	0.0406104	4.36906	0.00114537	0.973002
chr1	6084239	6089293	5055	chr1	6549021	6552107	3087	463798	2.60836	3.84426	1.8518	0.173574
chr1	6084239	6089293	5055	chr1	6645754	6648786	3033	560504	-2.09501	3.84509	0.973196	0.323884
chr1	6084239	6089293	5055	chr1	6760278	6762628	2351	674687	-2.09501	3.84509	0.973196	0.323884
chr1	6084239	6089293	5055	chr1	7830238	7832606	2369	1744656	2.60836	3.84426	1.8518	0.173574
chr1	6258289	6261264	2976	chr1	6294172	6297179	3008	35899	-2.15586	4.75221	3.10161	0.0782149
chr1	6258289	6261264	2976	chr1	6451765	6456407	4643	194309	-3.81646	4.25645	3.76266	0.0524092
chr1	6258289	6261264	2976	chr1	6549021	6552107	3087	290787	-3.43507	4.13208	2.85329	0.0911873
chr1	6258289	6261264	2976	chr1	6613194	6615994	2801	354817	-2.09501	3.84509	0.973196	0.323884
chr1	6258289	6261264	2976	chr1	6628968	6632079	3112	370747	-2.09501	3.84509	0.973196	0.323884
chr1	6258289	6261264	2976	chr1	6638483	6641497	3015	380213	-2.09517	3.84518	0.973285	0.323862
chr1	6258289	6261264	2976	chr1	6645754	6648786	3033	387493	-2.91537	3.99583	1.92392	0.165425
chr1	6258289	6261264	2976	chr1	6672448	6674866	2419	413880	0.51335	3.99501	0.0945291	0.758496
chr1	6258289	6261264	2976	chr1	6760278	6762628	2351	501676	-2.09517	3.84518	0.973285	0.323862
chr1	6294172	6297179	3008	chr1	6549021	6552107	3087	254888	2.60836	3.84426	1.8518	0.173574
chr1	6294172	6297179	3008	chr1	6613194	6615994	2801	318918	-2.09517	3.84518	0.973285	0.323862
chr1	6294172	6297179	3008	chr1	6628968	6632079	3112	334848	2.60836	3.84426	1.8518	0.173574
chr1	6294172	6297179	3008	chr1	6843325	6847408	4084	549691	2.66682	3.86614	1.9005	0.168022
chr1	6369083	6371298	2216	chr1	6549021	6552107	3087	180373	-2.09501	3.84509	0.973196	0.323884
chr1	6369083	6371298	2216	chr1	6638483	6641497	3015	269799	-2.09501	3.84509	0.973196	0.323884
chr1	6393489	6395463	1975	chr1	6613194	6615994	2801	220118	-2.09517	3.84518	0.973285	0.323862
chr1	6451765	6456407	4643	chr1	6549021	6552107	3087	96478	4.06313	4.15125	5.48097	0.0192246
chr1	6451765	6456407	4643	chr1	6613194	6615994	2801	160508	2.60836	3.84426	1.8518	0.173574
chr1	6451765	6456407	4643	chr1	6830978	6832732	1755	377769	-2.09501	3.84509	0.973196	0.323884
chr1	6451765	6456407	4643	chr1	7425693	7429307	3615	973414	-2.09517	3.84518	0.973285	0.323862
chr1	6549021	6552107	3087	chr1	6613194	6615994	2801	64030	-3.43539	4.13226	2.85378	0.0911595
chr1	6549021	6552107	3087	chr1	6619669	6621436	1768	69988	0.51335	3.99501	0.0945291	0.758496
chr1	6549021	6552107	3087	chr1	6638483	6641497	3015	89426	-2.09501	3.84509	0.973196	0.323884
chr1	6549021	6552107	3087	chr1	8482716	8491398	8683	1936493	-2.91569	3.99601	1.92426	0.165388
chr1	6613194	6615994	2801	chr1	6619669	6621436	1768	5958	-0.307176	4.13137	0.0400325	0.841417
chr1	6613194	6615994	2801	chr1	6628968	6632079	3112	15929	-0.64231	4.57336	0.309873	0.577758
chr1	6613194	6615994	2801	chr1	6638483	6641497	3015	25396	-1.23187	4.85357	1.33399	0.248097
chr1	6613194	6615994	2801	chr1	6645754	6648786	3033	32676	-3.43507	4.13208	2.85329	0.0911873
chr1	6613194	6615994	2801	chr1	6672448	6674866	2419	59063	0.560148	4.25488	0.176678	0.674244
chr1	6613194	6615994	2801	chr1	6760278	6762628	2351	146859	1.38067	4.13048	0.870548	0.350804
chr1	6613194	6615994	2801	chr1	6835405	6838836	3432	222526	0.51335	3.99501	0.0945291	0.758496
chr1	6613194	6615994	2801	chr1	8012463	8015329	2867	1399302	-2.09517	3.84518	0.973285	0.323862
chr1	6613194	6615994	2801	chr1	8020746	8023080	2335	1407319	2.60836	3.84426	1.8518	0.173574
chr1	6613194	6615994	2801	chr1	8482716	8491398	8683	1872463	0.513182	3.9951	0.0944795	0.758558
chr1	6619669	6621436	1768	chr1	6628968	6632079	3112	9971	-0.891644	4.66544	0.635508	0.425342
chr1	6619669	6621436	1768	chr1	6638483	6641497	3015	19437	2.29599	4.36759	3.13794	0.0764901
chr1	6619669	6621436	1768	chr1	6645754	6648786	3033	26717	-2.09501	3.84509	0.973196	0.323884
chr1	6619669	6621436	1768	chr1	8482716	8491398	8683	1866504	2.60836	3.84426	1.8518	0.173574
chr1	6619669	6621436	1768	chr1	8588985	8594769	5785	1971324	2.60836	3.84426	1.8518	0.173574
chr1	6628968	6632079	3112	chr1	6638483	6641497	3015	9466	1.82806	4.59196	2.69791	0.10048
chr1	6628968	6632079	3112	chr1	6645754	6648786	3033	16746	-2.09501	3.84509	0.973196	0.323884
chr1	6628968	6632079	3112	chr1	6672448	6674866	2419	43133	2.60836	3.84426	1.8518	0.173574
chr1	6638483	6641497	3015	chr1	6645754	6648786	3033	7280	0.00795448	5.178	0.000134027	0.990763
chr1	6638483	6641497	3015	chr1	6672448	6674866	2419	33667	-3.43523	4.13217	2.85353	0.0911734
chr1	6638483	6641497	3015	chr1	6830978	6832732	1755	191865	-2.09517	3.84518	0.973285	0.323862
chr1	6638483	6641497	3015	chr1	6843325	6847408	4084	205376	-2.09501	3.84509	0.973196	0.323884
chr1	6638483	6641497	3015	chr1	7425693	7429307	3615	787510	2.60836	3.84426	1.8518	0.173574
chr1	6638483	6641497	3015	chr1	8482716	8491398	8683	1847067	-2.09501	3.84509	0.973196	0.323884
chr1	6645754	6648786	3033	chr1	6672448	6674866	2419	26387	-2.91537	3.99583	1.92392	0.165425
chr1	6645754	6648786	3033	chr1	8482716	8491398	8683	1839787	2.60836	3.84426	1.8518	0.173574
chr1	6672448	6674866	2419	chr1	6843325	6847408	4084	171709	-2.09501	3.84509	0.973196	0.323884
chr1	6672448	6674866	2419	chr1	8482716	8491398	8683	1813400	-2.09501	3.84509	0.973196	0.323884
chr1	6760278	6762628	2351	chr1	6835405	6838836	3432	75667	1.38067	4.13048	0.870548	0.350804
chr1	6760278	6762628	2351	chr1	6843325	6847408	4084	83913	3.47568	3.9942	3.63313	0.0566402
chr1	6760278	6762628	2351	chr1	7634071	7636000	1930	873582	-2.09501	3.84509	0.973196	0.323884
chr1	6760278	6762628	2351	chr1	7731234	7732718	1485	970523	-2.09517	3.84518	0.973285	0.323862
chr1	6760278	6762628	2351	chr1	8455311	8459760	4450	1696082	-2.09501	3.84509	0.973196	0.323884
chr1	6760278	6762628	2351	chr1	8482716	8491398	8683	1725604	-2.09501	3.84509	0.973196	0.323884
chr1	6760278	6762628	2351	chr1	8571752	8573613	1862	1811229	-2.09517	3.84518	0.973285	0.323862
chr1	6830978	6832732	1755	chr1	6835405	6838836	3432	5265	-4.9283	4.75301	8.03607	0.0045855
chr1	6830978	6832732	1755	chr1	6843325	6847408	4084	13511	-1.50948	4.4757	1.2998	0.254251
chr1	6830978	6832732	1755	chr1	8553728	8557763	4036	1723890	2.60836	3.84426	1.8518	0.173574
chr1	6835405	6838836	3432	chr1	6843325	6847408	4084	8246	-1.73008	5.40739	3.88123	0.0488286
chr1	6835405	6838836	3432	chr1	7464215	7468836	4622	629405	2.60836	3.84426	1.8518	0.173574
chr1	6835405	6838836	3432	chr1	8482716	8491398	8683	1649936	-2.09517	3.84518	0.973285	0.323862
chr1	6835405	6838836	3432	chr1	8571752	8573613	1862	1735562	-2.09501	3.84509	0.973196	0.323884
chr1	6835405	6838836	3432	chr1	8578185	8580291	2107	1742117	-2.09501	3.84509	0.973196	0.323884
chr1	6835405	6838836	3432	chr1	8702050	8705760	3711	1866784	-2.09517	3.84518	0.973285	0.323862
chr1	6835405	6838836	3432	chr1	8760141	8763768	3628	1924834	-2.09501	3.84509	0.973196	0.323884
chr1	6843325	6847408	4084	chr1	6910884	6912280	1397	66215	2.60836	3.84426	1.8518	0.173574
chr1	6843325	6847408	4084	chr1	7437756	7439492	1737	593257	2.60836	3.84426	1.8518	0.173574
chr1	6843325	6847408	4084	chr1	8020746	8023080	2335	1176546	2.66682	3.86614	1.9005	0.168022
chr1	6843325	6847408	4084	chr1	8482716	8491398	8683	1641690	0.51335	3.99501	0.0945291	0.758496
chr1	6843325	6847408	4084	chr1	8588985	8594769	5785	1746510	2.60836	3.84426	1.8518	0.173574
chr1	7325611	7327522	1912	chr1	7540830	7542292	1463	214994	-2.09501	3.84509	0.973196	0.323884
chr1	7325611	7327522	1912	chr1	8823467	8826204	2738	1498269	-2.09501	3.84509	0.973196	0.323884
chr1	7425693	7429307	3615	chr1	7437756	7439492	1737	11124	-2.09517	3.84518	0.973285	0.323862
chr1	7425693	7429307	3615	chr1	7464215	7468836	4622	39025	-2.91553	3.99592	1.92409	0.165407
chr1	7425693	7429307	3615	chr1	8482716	8491398	8683	1059557	-2.09501	3.84509	0.973196	0.323884
chr1	7425693	7429307	3615	chr1	8588985	8594769	5785	1164377	-2.09501	3.84509	0.973196	0.323884
chr1	7425693	7429307	3615	chr1	8823467	8826204	2738	1397335	-2.91553	3.99592	1.92409	0.165407
chr1	7425693	7429307	3615	chr1	9121437	9125548	4112	1695992	-2.09501	3.84509	0.973196	0.323884
chr1	7437756	7439492	1737	chr1	7464215	7468836	4622	27901	0.513182	3.9951	0.0944795	0.758558
chr1	7437756	7439492	1737	chr1	8020746	8023080	2335	583289	-2.09517	3.84518	0.973285	0.323862
chr1	7464215	7468836	4622	chr1	7540830	7542292	1463	75035	-2.09517	3.84518	0.973285	0.323862
chr1	7464215	7468836	4622	chr1	7642476	7644294	1819	176859	-2.09517	3.84518	0.973285	0.323862
chr1	7464215	7468836	4622	chr1	7830238	7832606	2369	364896	2.60836	3.84426	1.8518	0.173574
chr1	7464215	7468836	4622	chr1	8571752	8573613	1862	1106157	-2.09517	3.84518	0.973285	0.323862
chr1	7464215	7468836	4622	chr1	8814917	8816746	1830	1349306	2.60836	3.84426	1.8518	0.173574
chr1	7464215	7468836	4622	chr1	8839496	8841869	2374	1374157	-2.09517	3.84518	0.973285	0.323862
chr1	7504017	7505350	1334	chr1	9067242	9072046	4805	1564960	-2.09517	3.84518	0.973285	0.323862
chr1	7540830	7542292	1463	chr1	8020746	8023080	2335	480352	-2.09501	3.84509	0.973196	0.323884
chr1	7540830	7542292	1463	chr1	8702050	8705760	3711	1162344	-2.09517	3.84518	0.973285	0.323862
chr1	7634071	7636000	1930	chr1	7642476	7644294	1819	8349	-2.09517	3.84518	0.973285	0.323862
chr1	7634071	7636000	1930	chr1	9137906	9143657	5752	1505746	2.60836	3.84426	1.8518	0.173574
chr1	7642476	7644294	1819	chr1	8020746	8023080	2335	378528	-2.09501	3.84509	0.973196	0.323884
chr1	7642476	7644294	1819	chr1	9484561	9488337	3777	1843064	-2.09517	3.84518	0.973285	0.323862
chr1	7731234	7732718	1485	chr1	8876111	8879195	3085	1145677	2.60836	3.84426	1.8518	0.173574
chr1	7830238	7832606	2369	chr1	8020746	8023080	2335	190491	2.60836	3.84426	1.8518	0.173574
chr1	7830238	7832606	2369	chr1	8482716	8491398	8683	655635	-2.91553	3.99592	1.92409	0.165407
chr1	7830238	7832606	2369	chr1	8584306	8586445	2140	753953	0.513182	3.9951	0.0944795	0.758558
chr1	7830238	7832606	2369	chr1	8876111	8879195	3085	1046231	2.60836	3.84426	1.8518	0.173574
chr1	7830238	7832606	2369	chr1	9067242	9072046	4805	1238222	-2.09517	3.84518	0.973285	0.323862
chr1	7830238	7832606	2369	chr1	9479498	9481290	1793	1648972	-2.09501	3.84509	0.973196	0.323884
chr1	7927631	7930431	2801	chr1	8482716	8491398	8683	558026	-2.09501	3.84509	0.973196	0.323884
chr1	7927631	7930431	2801	chr1	8578185	8580291	2107	650207	-2.09517	3.84518	0.973285	0.323862
chr1	7927631	7930431	2801	chr1	9121437	9125548	4112	1194461	-2.09501	3.84509	0.973196	0.323884
chr1	8012463	8015329	2867	chr1	8020746	8023080	2335	8017	1.91245	4.25409	1.94741	0.162866
chr1	8012463	8015329	2867	chr1	8455311	8459760	4450	443639	-2.09517	3.84518	0.973285	0.323862
chr1	8012463	8015329	2867	chr1	8482716	8491398	8683	473161	-2.09501	3.84509	0.973196	0.323884
chr1	8012463	8015329	2867	chr1	8578185	8580291	2107	565342	-2.09501	3.84509	0.973196	0.323884
chr1	8012463	8015329	2867	chr1	8588985	8594769	5785	577981	0.513182	3.9951	0.0944795	0.758558
chr1	8012463	8015329	2867	chr1	8702050	8705760	3711	690009	2.66682	3.86614	1.9005	0.168022
chr1	8012463	8015329	2867	chr1	8876111	8879195	3085	863757	2.60836	3.84426	1.8518	0.173574
chr1	8012463	8015329	2867	chr1	9096675	9099697	3023	1084290	-2.09517	3.84518	0.973285	0.323862
chr1	8020746	8023080	2335	chr1	8401782	8404603	2822	381279	-2.09501	3.84509	0.973196	0.323884
chr1	8020746	8023080	2335	chr1	8482716	8491398	8683	465144	-2.91553	3.99592	1.92409	0.165407
chr1	8020746	8023080	2335	chr1	8578185	8580291	2107	557325	-2.09517	3.84518	0.973285	0.323862
chr1	8020746	8023080	2335	chr1	8689051	8690482	1432	667853	-2.09501	3.84509	0.973196	0.323884
chr1	8020746	8023080	2335	chr1	8760141	8763768	3628	740041	-2.91537	3.99583	1.92392	0.165425
chr1	8020746	8023080	2335	chr1	8823467	8826204	2738	802922	2.60836	3.84426	1.8518	0.173574
chr1	8020746	8023080	2335	chr1	8937383	8940454	3072	917005	-2.09501	3.84509	0.973196	0.323884
chr1	8020746	8023080	2335	chr1	9067242	9072046	4805	1047731	-2.09501	3.84509	0.973196	0.323884
chr1	8020746	8023080	2335	chr1	9134858	9136911	2054	1113971	2.66682	3.86614	1.9005	0.168022
chr1	8076139	8077770	1632	chr1	8588985	8594769	5785	514922	1.43761	4.15206	0.932795	0.334138
chr1	8076139	8077770	1632	chr1	8937383	8940454	3072	861964	-2.09517	3.84518	0.973285	0.323862
chr1	8076139	8077770	1632	chr1	9067242	9072046	4805	992689	-2.09501	3.84509	0.973196	0.323884
chr1	8401782	8404603	2822	chr1	8482716	8491398	8683	83864	-2.09517	3.84518	0.973285	0.323862
chr1	8401782	8404603	2822	chr1	8588985	8594769	5785	188684	3.47568	3.9942	3.63313	0.0566402
chr1	8401782	8404603	2822	chr1	8937383	8940454	3072	535726	-2.09501	3.84509	0.973196	0.323884
chr1	8401782	8404603	2822	chr1	10009103	10012132	3030	1607425	2.60836	3.84426	1.8518	0.173574
chr1	8426022	8428484	2463	chr1	8455311	8459760	4450	30282	-0.826872	4.25566	0.330286	0.565491
chr1	8426022	8428484	2463	chr1	8482716	8491398	8683	59804	-0.307176	4.13137	0.0400325	0.841417
chr1	8426022	8428484	2463	chr1	8532404	8534809	2406	106353	0.513182	3.9951	0.0944795	0.758558
chr1	8426022	8428484	2463	chr1	8553728	8557763	4036	128492	1.38067	4.13048	0.870548	0.350804
chr1	8426022	8428484	2463	chr1	8571752	8573613	1862	145429	2.60836	3.84426	1.8518	0.173574
chr1	8426022	8428484	2463	chr1	8584306	8586445	2140	158122	-2.09501	3.84509	0.973196	0.323884
chr1	8426022	8428484	2463	chr1	8588985	8594769	5785	164624	2.60836	3.84426	1.8518	0.173574
chr1	8426022	8428484	2463	chr1	8702050	8705760	3711	276652	-2.09501	3.84509	0.973196	0.323884
chr1	8426022	8428484	2463	chr1	8711106	8713374	2269	284987	-2.09517	3.84518	0.973285	0.323862
chr1	8426022	8428484	2463	chr1	8876111	8879195	3085	450400	-2.09501	3.84509	0.973196	0.323884
chr1	8426022	8428484	2463	chr1	8937383	8940454	3072	511665	-2.09501	3.84509	0.973196	0.323884
chr1	8426022	8428484	2463	chr1	9434974	9436569	1596	1008518	2.60836	3.84426	1.8518	0.173574
chr1	8426022	8428484	2463	chr1	9907425	9912111	4687	1482515	-2.09501	3.84509	0.973196	0.323884
chr1	8455311	8459760	4450	chr1	8482716	8491398	8683	29521	-0.152852	5.78822	0.0495223	0.823897
chr1	8455311	8459760	4450	chr1	8532404	8534809	2406	76071	0.0404524	4.36914	0.00113756	0.973094
chr1	8455311	8459760	4450	chr1	8553728	8557763	4036	98210	1.25526	4.663	1.46789	0.225678
chr1	8455311	8459760	4450	chr1	8571752	8573613	1862	115147	-0.82703	4.25575	0.330401	0.565423
chr1	8455311	8459760	4450	chr1	8578185	8580291	2107	121702	1.43761	4.15206	0.932795	0.334138
chr1	8455311	8459760	4450	chr1	8584306	8586445	2140	127840	0.513182	3.9951	0.0944795	0.758558
chr1	8455311	8459760	4450	chr1	8588985	8594769	5785	134341	0.376703	4.92801	0.166381	0.683348
chr1	8455311	8459760	4450	chr1	8689051	8690482	1432	232231	-2.09501	3.84509	0.973196	0.323884
chr1	8455311	8459760	4450	chr1	8702050	8705760	3711	246369	2.60836	3.84426	1.8518	0.173574
chr1	8455311	8459760	4450	chr1	8711106	8713374	2269	254704	-3.81677	4.25662	3.76328	0.0523897
chr1	8455311	8459760	4450	chr1	8760141	8763768	3628	304419	-2.91553	3.99592	1.92409	0.165407
chr1	8455311	8459760	4450	chr1	8814917	8816746	1830	358296	-2.09517	3.84518	0.973285	0.323862
chr1	8455311	8459760	4450	chr1	8823467	8826204	2738	367300	2.66682	3.86614	1.9005	0.168022
chr1	8455311	8459760	4450	chr1	8937383	8940454	3072	481383	-2.09501	3.84509	0.973196	0.323884
chr1	8455311	8459760	4450	chr1	9067242	9072046	4805	612108	0.51335	3.99501	0.0945291	0.758496
chr1	8455311	8459760	4450	chr1	9121437	9125548	4112	665957	2.60836	3.84426	1.8518	0.173574
chr1	8455311	8459760	4450	chr1	9126987	9130377	3391	671146	-2.09501	3.84509	0.973196	0.323884
chr1	8455311	8459760	4450	chr1	9134858	9136911	2054	678349	3.47568	3.9942	3.63313	0.0566402
chr1	8455311	8459760	4450	chr1	9137906	9143657	5752	683246	2.60836	3.84426	1.8518	0.173574
chr1	8482716	8491398	8683	chr1	8532404	8534809	2406	46549	-0.273575	5.29656	0.114372	0.735221
chr1	8482716	8491398	8683	chr1	8553728	8557763	4036	68688	0.0350456	6.74945	0.00453095	0.946333
chr1	8482716	8491398	8683	chr1	8571752	8573613	1862	85625	1.171	4.85062	1.51097	0.21899
chr1	8482716	8491398	8683	chr1	8578185	8580291	2107	92181	0.272423	5.45484	0.13632	0.711967
chr1	8482716	8491398	8683	chr1	8584306	8586445	2140	98318	-1.05302	5.2977	1.52177	0.217352
chr1	8482716	8491398	8683	chr1	8588985	8594769	5785	104820	0.355058	6.37252	0.373304	0.541209
chr1	8482716	8491398	8683	chr1	8689051	8690482	1432	202709	1.38051	4.13056	0.870365	0.350854
chr1	8482716	8491398	8683	chr1	8702050	8705760	3711	216848	-0.359703	4.751	0.121914	0.726968
chr1	8482716	8491398	8683	chr1	8711106	8713374	2269	225183	0.560148	4.25488	0.176678	0.674244
chr1	8482716	8491398	8683	chr1	8760141	8763768	3628	274897	-4.11769	4.37069	4.65243	0.0310097
chr1	8482716	8491398	8683	chr1	8814917	8816746	1830	328774	-0.826872	4.25566	0.330286	0.565491
chr1	8482716	8491398	8683	chr1	8823467	8826204	2738	337778	-2.15654	4.7526	3.10369	0.078115
chr1	8482716	8491398	8683	chr1	8839496	8841869	2374	353625	2.60836	3.84426	1.8518	0.173574
chr1	8482716	8491398	8683	chr1	8876111	8879195	3085	390596	-0.82703	4.25575	0.330401	0.565423
chr1	8482716	8491398	8683	chr1	8937383	8940454	3072	451861	2.29599	4.36759	3.13794	0.0764901
chr1	8482716	8491398	8683	chr1	9045973	9048387	2415	560123	-2.09501	3.84509	0.973196	0.323884
chr1	8482716	8491398	8683	chr1	9067242	9072046	4805	582587	-0.82703	4.25575	0.330401	0.565423
chr1	8482716	8491398	8683	chr1	9121437	9125548	4112	636435	3.47568	3.9942	3.63313	0.0566402
chr1	8482716	8491398	8683	chr1	9126987	9130377	3391	641625	-2.09517	3.84518	0.973285	0.323862
chr1	8482716	8491398	8683	chr1	9134858	9136911	2054	648827	1.43761	4.15206	0.932795	0.334138
chr1	8482716	8491398	8683	chr1	9137906	9143657	5752	653724	-0.110518	4.66463	0.0105823	0.918066
chr1	8482716	8491398	8683	chr1	9294155	9296678	2524	808359	-2.09517	3.84518	0.973285	0.323862
chr1	8482716	8491398	8683	chr1	9440568	9441891	1324	954172	-2.09501	3.84509	0.973196	0.323884
chr1	8482716	8491398	8683	chr1	9472046	9475771	3726	986851	-2.09501	3.84509	0.973196	0.323884
chr1	8482716	8491398	8683	chr1	9484561	9488337	3777	999392	0.513182	3.9951	0.0944795	0.758558
chr1	8482716	8491398	8683	chr1	9687977	9691246	3270	1202554	-2.91553	3.99592	1.92409	0.165407
chr1	8482716	8491398	8683	chr1	9881709	9884826	3118	1396210	-2.09517	3.84518	0.973285	0.323862
chr1	8482716	8491398	8683	chr1	9907425	9912111	4687	1422711	3.47568	3.9942	3.63313	0.0566402
chr1	8532404	8534809	2406	chr1	8553728	8557763	4036	22139	-0.993748	5.70791	1.77928	0.182238
chr1	8532404	8534809	2406	chr1	8571752	8573613	1862	39076	1.38051	4.13056	0.870365	0.350854
chr1	8532404	8534809	2406	chr1	8578185	8580291	2107	45631	-2.91553	3.99592	1.92409	0.165407
chr1	8532404	8534809	2406	chr1	8584306	8586445	2140	51769	2.60836	3.84426	1.8518	0.173574
chr1	8532404	8534809	2406	chr1	8588985	8594769	5785	58270	0.348336	5.39003	0.202072	0.653053
chr1	8532404	8534809	2406	chr1	8711106	8713374	2269	178633	0.51335	3.99501	0.0945291	0.758496
chr1	8532404	8534809	2406	chr1	8937383	8940454	3072	405312	-2.09517	3.84518	0.973285	0.323862
chr1	8532404	8534809	2406	chr1	9067242	9072046	4805	536037	2.60836	3.84426	1.8518	0.173574
chr1	8532404	8534809	2406	chr1	9121437	9125548	4112	589886	-0.307013	4.13128	0.0399955	0.841489
chr1	8532404	8534809	2406	chr1	9134858	9136911	2054	602278	-0.307013	4.13128	0.0399955	0.841489
chr1	8532404	8534809	2406	chr1	9137906	9143657	5752	607175	2.60836	3.84426	1.8518	0.173574
chr1	8532404	8534809	2406	chr1	9479498	9481290	1793	946787	-2.09517	3.84518	0.973285	0.323862
chr1	8532404	8534809	2406	chr1	9711253	9715818	4566	1179929	-2.09517	3.84518	0.973285	0.323862
chr1	8553728	8557763	4036	chr1	8571752	8573613	1862	16937	0.553031	5.35005	0.524264	0.469029
chr1	8553728	8557763	4036	chr1	8578185	8580291	2107	23492	-0.0803688	5.99072	0.0154071	0.901216
chr1	8553728	8557763	4036	chr1	8584306	8586445	2140	29630	0.0313307	5.63714	0.00186427	0.96556
chr1	8553728	8557763	4036	chr1	8588985	8594769	5785	36131	-0.623658	6.27646	1.01153	0.314536
chr1	8553728	8557763	4036	chr1	8689051	8690482	1432	134021	2.60836	3.84426	1.8518	0.173574
chr1	8553728	8557763	4036	chr1	8702050	8705760	3711	148159	0.0402943	4.36923	0.00112977	0.973186
chr1	8553728	8557763	4036	chr1	8711106	8713374	2269	156494	0.560148	4.25488	0.176678	0.674244
chr1	8553728	8557763	4036	chr1	8760141	8763768	3628	206209	3.47568	3.9942	3.63313	0.0566402
chr1	8553728	8557763	4036	chr1	8823467	8826204	2738	269090	-1.50948	4.4757	1.2998	0.254251
chr1	8553728	8557763	4036	chr1	8876111	8879195	3085	321907	0.0404524	4.36914	0.00113756	0.973094
chr1	8553728	8557763	4036	chr1	8937383	8940454	3072	383173	-1.50948	4.4757	1.2998	0.254251
chr1	8553728	8557763	4036	chr1	9067242	9072046	4805	513898	2.60836	3.84426	1.8518	0.173574
chr1	8553728	8557763	4036	chr1	9096675	9099697	3023	542440	-2.09517	3.84518	0.973285	0.323862
chr1	8553728	8557763	4036	chr1	9121437	9125548	4112	567747	2.66682	3.86614	1.9005	0.168022
chr1	8553728	8557763	4036	chr1	9126987	9130377	3391	572936	-2.09517	3.84518	0.973285	0.323862
chr1	8553728	8557763	4036	chr1	9134858	9136911	2054	580139	2.60836	3.84426	1.8518	0.173574
chr1	8553728	8557763	4036	chr1	9137906	9143657	5752	585036	0.191317	4.57237	0.0309513	0.860349
chr1	8553728	8557763	4036	chr1	9188731	9190607	1877	633923	2.60836	3.84426	1.8518	0.173574
chr1	8553728	8557763	4036	chr1	9464736	9467982	3247	910613	-3.43523	4.13217	2.85353	0.0911734
chr1	8553728	8557763	4036	chr1	9472046	9475771	3726	918163	2.60836	3.84426	1.8518	0.173574
chr1	8553728	8557763	4036	chr1	9479498	9481290	1793	924648	-2.09501	3.84509	0.973196	0.323884
chr1	8553728	8557763	4036	chr1	9647906	9651638	3733	1094026	2.60836	3.84426	1.8518	0.173574
chr1	8553728	8557763	4036	chr1	9711253	9715818	4566	1157790	-2.09501	3.84509	0.973196	0.323884
chr1	8553728	8557763	4036	chr1	9922379	9926527	4149	1368707	2.60836	3.84426	1.8518	0.173574
chr1	8553728	8557763	4036	chr1	9940361	9942428	2068	1385649	2.60836	3.84426	1.8518	0.173574
chr1	8553728	8557763	4036	chr1	10531332	10536785	5454	1978313	2.60836	3.84426	1.8518	0.173574
chr1	8571752	8573613	1862	chr1	8578185	8580291	2107	6555	-1.0451	5.68876	1.97477	0.159943
chr1	8571752	8573613	1862	chr1	8584306	8586445	2140	12693	-0.826872	4.25566	0.330286	0.565491
chr1	8571752	8573613	1862	chr1	8588985	8594769	5785	19194	0.248355	5.70497	0.130183	0.718242
chr1	8571752	8573613	1862	chr1	8689051	8690482	1432	117084	2.60836	3.84426	1.8518	0.173574
chr1	8571752	8573613	1862	chr1	8711106	8713374	2269	139557	0.571643	4.01684	0.112349	0.737485
chr1	8571752	8573613	1862	chr1	8823467	8826204	2738	252153	-2.09501	3.84509	0.973196	0.323884
chr1	8571752	8573613	1862	chr1	8876111	8879195	3085	304970	2.60836	3.84426	1.8518	0.173574
chr1	8571752	8573613	1862	chr1	8937383	8940454	3072	366236	-0.82703	4.25575	0.330401	0.565423
chr1	8571752	8573613	1862	chr1	9067242	9072046	4805	496961	3.47568	3.9942	3.63313	0.0566402
chr1	8571752	8573613	1862	chr1	9134858	9136911	2054	563202	2.60836	3.84426	1.8518	0.173574
chr1	8571752	8573613	1862	chr1	9137906	9143657	5752	568099	0.51335	3.99501	0.0945291	0.758496
chr1	8571752	8573613	1862	chr1	9188731	9190607	1877	616986	2.60836	3.84426	1.8518	0.173574
chr1	8571752	8573613	1862	chr1	9472046	9475771	3726	901226	-2.09517	3.84518	0.973285	0.323862
chr1	8571752	8573613	1862	chr1	9647906	9651638	3733	1077089	2.60836	3.84426	1.8518	0.173574
chr1	8578185	8580291	2107	chr1	8584306	8586445	2140	6137	-0.62951	5.66399	0.736518	0.390778
chr1	8578185	8580291	2107	chr1	8588985	8594769	5785	12639	-0.361869	6.57805	0.407173	0.523408
chr1	8578185	8580291	2107	chr1	8702050	8705760	3711	124667	-2.91553	3.99592	1.92409	0.165407
chr1	8578185	8580291	2107	chr1	8711106	8713374	2269	133002	1.38067	4.13048	0.870548	0.350804
chr1	8578185	8580291	2107	chr1	8760141	8763768	3628	182716	-2.91553	3.99592	1.92409	0.165407
chr1	8578185	8580291	2107	chr1	8814917	8816746	1830	236593	2.60836	3.84426	1.8518	0.173574
chr1	8578185	8580291	2107	chr1	8823467	8826204	2738	245597	-2.09517	3.84518	0.973285	0.323862
chr1	8578185	8580291	2107	chr1	8876111	8879195	3085	298415	-2.09501	3.84509	0.973196	0.323884
chr1	8578185	8580291	2107	chr1	8937383	8940454	3072	359680	0.513182	3.9951	0.0944795	0.758558
chr1	8578185	8580291	2107	chr1	9045973	9048387	2415	467942	-2.09501	3.84509	0.973196	0.323884
chr1	8578185	8580291	2107	chr1	9067242	9072046	4805	490406	-2.91569	3.99601	1.92426	0.165388
chr1	8578185	8580291	2107	chr1	9096675	9099697	3023	518948	-2.09501	3.84509	0.973196	0.323884
chr1	8578185	8580291	2107	chr1	9121437	9125548	4112	544254	-2.91537	3.99583	1.92392	0.165425
chr1	8578185	8580291	2107	chr1	9137906	9143657	5752	561543	0.0404524	4.36914	0.00113756	0.973094
chr1	8578185	8580291	2107	chr1	9294155	9296678	2524	716178	2.60836	3.84426	1.8518	0.173574
chr1	8578185	8580291	2107	chr1	9472046	9475771	3726	894670	2.60836	3.84426	1.8518	0.173574
chr1	8578185	8580291	2107	chr1	9484561	9488337	3777	907211	-2.09501	3.84509	0.973196	0.323884
chr1	8578185	8580291	2107	chr1	9597661	9600208	2548	1019696	-2.09517	3.84518	0.973285	0.323862
chr1	8578185	8580291	2107	chr1	9711253	9715818	4566	1134297	0.51335	3.99501	0.0945291	0.758496
chr1	8578185	8580291	2107	chr1	9740271	9742218	1948	1162006	-2.09501	3.84509	0.973196	0.323884
chr1	8584306	8586445	2140	chr1	8588985	8594769	5785	6501	0.0781647	6.20971	0.0176963	0.894172
chr1	8584306	8586445	2140	chr1	8702050	8705760	3711	118529	-2.09501	3.84509	0.973196	0.323884
chr1	8584306	8586445	2140	chr1	8711106	8713374	2269	126864	1.38051	4.13056	0.870365	0.350854
chr1	8584306	8586445	2140	chr1	8814917	8816746	1830	230456	-2.09501	3.84509	0.973196	0.323884
chr1	8584306	8586445	2140	chr1	8876111	8879195	3085	292277	0.51335	3.99501	0.0945291	0.758496
chr1	8584306	8586445	2140	chr1	8937383	8940454	3072	353543	-2.09517	3.84518	0.973285	0.323862
chr1	8584306	8586445	2140	chr1	9067242	9072046	4805	484268	0.616919	4.2764	0.209581	0.647096
chr1	8584306	8586445	2140	chr1	9137906	9143657	5752	555406	1.09193	4.36845	0.787669	0.374806
chr1	8584306	8586445	2140	chr1	9484561	9488337	3777	901073	-2.09517	3.84518	0.973285	0.323862
chr1	8584306	8586445	2140	chr1	9740271	9742218	1948	1155869	2.66682	3.86614	1.9005	0.168022
chr1	8584306	8586445	2140	chr1	9775804	9779669	3866	1192361	2.60836	3.84426	1.8518	0.173574
chr1	8584306	8586445	2140	chr1	9922379	9926527	4149	1339077	-2.09517	3.84518	0.973285	0.323862
chr1	8588985	8594769	5785	chr1	8689051	8690482	1432	97889	-2.91553	3.99592	1.92409	0.165407
chr1	8588985	8594769	5785	chr1	8702050	8705760	3711	112028	-1.28853	4.83278	1.46142	0.226705
chr1	8588985	8594769	5785	chr1	8711106	8713374	2269	120363	2.29599	4.36759	3.13794	0.0764901
chr1	8588985	8594769	5785	chr1	8760141	8763768	3628	170077	-0.82703	4.25575	0.330401	0.565423
chr1	8588985	8594769	5785	chr1	8814917	8816746	1830	223954	1.38051	4.13056	0.870365	0.350854
chr1	8588985	8594769	5785	chr1	8823467	8826204	2738	232958	-0.340778	4.47486	0.0805815	0.776511
chr1	8588985	8594769	5785	chr1	8839496	8841869	2374	248805	1.38067	4.13048	0.870548	0.350804
chr1	8588985	8594769	5785	chr1	8876111	8879195	3085	285776	1.38067	4.13048	0.870548	0.350804
chr1	8588985	8594769	5785	chr1	8937383	8940454	3072	347041	0.273024	4.7502	0.0762615	0.782429
chr1	8588985	8594769	5785	chr1	9045973	9048387	2415	455303	-2.09517	3.84518	0.973285	0.323862
chr1	8588985	8594769	5785	chr1	9058799	9060453	1655	467749	-2.09517	3.84518	0.973285	0.323862
chr1	8588985	8594769	5785	chr1	9067242	9072046	4805	477767	0.51335	3.99501	0.0945291	0.758496
chr1	8588985	8594769	5785	chr1	9096675	9099697	3023	506309	-2.09501	3.84509	0.973196	0.323884
chr1	8588985	8594769	5785	chr1	9121437	9125548	4112	531615	0.513182	3.9951	0.0944795	0.758558
chr1	8588985	8594769	5785	chr1	9126987	9130377	3391	536805	-4.11814	4.37094	4.65354	0.0309895
chr1	8588985	8594769	5785	chr1	9134858	9136911	2054	544007	1.38067	4.13048	0.870548	0.350804
chr1	8588985	8594769	5785	chr1	9137906	9143657	5752	548904	1.38067	4.13048	0.870548	0.350804
chr1	8588985	8594769	5785	chr1	9188731	9190607	1877	597792	-2.09501	3.84509	0.973196	0.323884
chr1	8588985	8594769	5785	chr1	9202869	9204309	1441	611712	-2.91553	3.99592	1.92409	0.165407
chr1	8588985	8594769	5785	chr1	9472046	9475771	3726	882031	-2.09501	3.84509	0.973196	0.323884
chr1	8588985	8594769	5785	chr1	9597661	9600208	2548	1007057	-2.09501	3.84509	0.973196	0.323884
chr1	8588985	8594769	5785	chr1	9628452	9630984	2533	1037841	2.60836	3.84426	1.8518	0.173574
chr1	8588985	8594769	5785	chr1	9647906	9651638	3733	1057895	-2.09501	3.84509	0.973196	0.323884
chr1	8588985	8594769	5785	chr1	9711253	9715818	4566	1121658	-2.09501	3.84509	0.973196	0.323884
chr1	8588985	8594769	5785	chr1	9907425	9912111	4687	1317891	-0.248552	4.15287	0.0278484	0.867466
chr1	8588985	8594769	5785	chr1	10002037	10004636	2600	1411459	-2.09501	3.84509	0.973196	0.323884
chr1	8588985	8594769	5785	chr1	10531332	10536785	5454	1942181	2.60836	3.84426	1.8518	0.173574
chr1	8689051	8690482	1432	chr1	8702050	8705760	3711	14138	-4.57947	4.57494	6.37885	0.0115488
chr1	8689051	8690482	1432	chr1	8711106	8713374	2269	22473	1.38067	4.13048	0.870548	0.350804
chr1	8689051	8690482	1432	chr1	8760141	8763768	3628	72188	-2.91553	3.99592	1.92409	0.165407
chr1	8689051	8690482	1432	chr1	8814917	8816746	1830	126065	-2.09501	3.84509	0.973196	0.323884
chr1	8689051	8690482	1432	chr1	8823467	8826204	2738	135069	-2.09517	3.84518	0.973285	0.323862
chr1	8689051	8690482	1432	chr1	8839496	8841869	2374	150916	2.66682	3.86614	1.9005	0.168022
chr1	8689051	8690482	1432	chr1	8876111	8879195	3085	187886	-2.09517	3.84518	0.973285	0.323862
chr1	8689051	8690482	1432	chr1	8937383	8940454	3072	249152	-2.09501	3.84509	0.973196	0.323884
chr1	8689051	8690482	1432	chr1	9121437	9125548	4112	433726	-2.09501	3.84509	0.973196	0.323884
chr1	8689051	8690482	1432	chr1	9137906	9143657	5752	451015	-0.307339	4.13145	0.0400697	0.841344
chr1	8702050	8705760	3711	chr1	8711106	8713374	2269	8335	-1.05302	5.2977	1.52177	0.217352
chr1	8702050	8705760	3711	chr1	8760141	8763768	3628	58049	-0.826872	4.25566	0.330286	0.565491
chr1	8702050	8705760	3711	chr1	8823467	8826204	2738	120930	2.60836	3.84426	1.8518	0.173574
chr1	8702050	8705760	3711	chr1	8839496	8841869	2374	136777	0.559985	4.25496	0.176586	0.674324
chr1	8702050	8705760	3711	chr1	8876111	8879195	3085	173748	2.60836	3.84426	1.8518	0.173574
chr1	8702050	8705760	3711	chr1	8937383	8940454	3072	235013	-3.43539	4.13226	2.85378	0.0911595
chr1	8702050	8705760	3711	chr1	9058799	9060453	1655	355721	2.60836	3.84426	1.8518	0.173574
chr1	8702050	8705760	3711	chr1	9067242	9072046	4805	365739	-2.91537	3.99583	1.92392	0.165425
chr1	8702050	8705760	3711	chr1	9096675	9099697	3023	394281	2.60836	3.84426	1.8518	0.173574
chr1	8702050	8705760	3711	chr1	9121437	9125548	4112	419587	-2.09517	3.84518	0.973285	0.323862
chr1	8702050	8705760	3711	chr1	9134858	9136911	2054	431979	-2.09517	3.84518	0.973285	0.323862
chr1	8702050	8705760	3711	chr1	9137906	9143657	5752	436876	0.559985	4.25496	0.176586	0.674324
chr1	8702050	8705760	3711	chr1	9234454	9236482	2029	531563	-2.09517	3.84518	0.973285	0.323862
chr1	8702050	8705760	3711	chr1	9434974	9436569	1596	731866	-2.09501	3.84509	0.973196	0.323884
chr1	8702050	8705760	3711	chr1	9464736	9467982	3247	762454	-2.09501	3.84509	0.973196	0.323884
chr1	8702050	8705760	3711	chr1	9479498	9481290	1793	776489	2.60836	3.84426	1.8518	0.173574
chr1	8702050	8705760	3711	chr1	9484561	9488337	3777	782544	2.60836	3.84426	1.8518	0.173574
chr1	8702050	8705760	3711	chr1	9628452	9630984	2533	925813	2.60836	3.84426	1.8518	0.173574
chr1	8702050	8705760	3711	chr1	9881709	9884826	3118	1179362	-2.09501	3.84509	0.973196	0.323884
chr1	8711106	8713374	2269	chr1	8760141	8763768	3628	49714	1.38051	4.13056	0.870365	0.350854
chr1	8711106	8713374	2269	chr1	8814917	8816746	1830	103591	-2.91569	3.99601	1.92426	0.165388
chr1	8711106	8713374	2269	chr1	8823467	8826204	2738	112595	-2.09517	3.84518	0.973285	0.323862
chr1	8711106	8713374	2269	chr1	8839496	8841869	2374	128442	-2.91569	3.99601	1.92426	0.165388
chr1	8711106	8713374	2269	chr1	8876111	8879195	3085	165413	2.60836	3.84426	1.8518	0.173574
chr1	8711106	8713374	2269	chr1	8937383	8940454	3072	226678	-3.43507	4.13208	2.85329	0.0911873
chr1	8711106	8713374	2269	chr1	9067242	9072046	4805	357404	3.47568	3.9942	3.63313	0.0566402
chr1	8711106	8713374	2269	chr1	9134858	9136911	2054	423644	3.47568	3.9942	3.63313	0.0566402
chr1	8711106	8713374	2269	chr1	9137906	9143657	5752	428541	-0.307013	4.13128	0.0399955	0.841489
chr1	8711106	8713374	2269	chr1	9294155	9296678	2524	583176	-2.09517	3.84518	0.973285	0.323862
chr1	8711106	8713374	2269	chr1	9484561	9488337	3777	774209	0.51335	3.99501	0.0945291	0.758496
chr1	8711106	8713374	2269	chr1	9687977	9691246	3270	977371	-2.09517	3.84518	0.973285	0.323862
chr1	8711106	8713374	2269	chr1	9711253	9715818	4566	1001295	-2.09517	3.84518	0.973285	0.323862
chr1	8760141	8763768	3628	chr1	8823467	8826204	2738	62881	-2.09501	3.84509	0.973196	0.323884
chr1	8760141	8763768	3628	chr1	8876111	8879195	3085	115698	-2.91553	3.99592	1.92409	0.165407
chr1	8760141	8763768	3628	chr1	8937383	8940454	3072	176964	0.51335	3.99501	0.0945291	0.758496
chr1	8760141	8763768	3628	chr1	9045973	9048387	2415	285225	-2.09517	3.84518	0.973285	0.323862
chr1	8760141	8763768	3628	chr1	9484561	9488337	3777	724494	-2.09501	3.84509	0.973196	0.323884
chr1	8760141	8763768	3628	chr1	9740271	9742218	1948	979290	-2.09501	3.84509	0.973196	0.323884
chr1	8814917	8816746	1830	chr1	8823467	8826204	2738	9004	-1.85597	5.11799	3.45866	0.0629213
chr1	8814917	8816746	1830	chr1	8839496	8841869	2374	24851	-3.43507	4.13208	2.85329	0.0911873
chr1	8814917	8816746	1830	chr1	8876111	8879195	3085	61821	1.38067	4.13048	0.870548	0.350804
chr1	8814917	8816746	1830	chr1	9067242	9072046	4805	253812	-2.09501	3.84509	0.973196	0.323884
chr1	8814917	8816746	1830	chr1	9121437	9125548	4112	307661	2.60836	3.84426	1.8518	0.173574
chr1	8814917	8816746	1830	chr1	9126987	9130377	3391	312850	0.571643	4.01684	0.112349	0.737485
chr1	8814917	8816746	1830	chr1	9134858	9136911	2054	320053	-2.09501	3.84509	0.973196	0.323884
chr1	8814917	8816746	1830	chr1	9137906	9143657	5752	324950	4.06313	4.15125	5.48097	0.0192246
chr1	8814917	8816746	1830	chr1	9846197	9848701	2505	1031617	-2.09517	3.84518	0.973285	0.323862
chr1	8814917	8816746	1830	chr1	9907425	9912111	4687	1093936	-2.09517	3.84518	0.973285	0.323862
chr1	8814917	8816746	1830	chr1	10457928	10460418	2491	1643341	2.66682	3.86614	1.9005	0.168022
chr1	8823467	8826204	2738	chr1	8839496	8841869	2374	15847	-1.45302	4.90993	1.93189	0.164551
chr1	8823467	8826204	2738	chr1	8876111	8879195	3085	52817	-4.11769	4.37069	4.65243	0.0310097
chr1	8823467	8826204	2738	chr1	8937383	8940454	3072	114083	-4.36703	4.47654	5.52459	0.018751
chr1	8823467	8826204	2738	chr1	9067242	9072046	4805	244808	2.60836	3.84426	1.8518	0.173574
chr1	8823467	8826204	2738	chr1	9096675	9099697	3023	273350	-2.09501	3.84509	0.973196	0.323884
chr1	8823467	8826204	2738	chr1	9126987	9130377	3391	303846	2.60836	3.84426	1.8518	0.173574
chr1	8823467	8826204	2738	chr1	9134858	9136911	2054	311049	-2.91553	3.99592	1.92409	0.165407
chr1	8823467	8826204	2738	chr1	9137906	9143657	5752	315946	-1.75839	4.57395	1.87403	0.171014
chr1	8823467	8826204	2738	chr1	9188731	9190607	1877	364833	-2.09501	3.84509	0.973196	0.323884
chr1	8823467	8826204	2738	chr1	9434974	9436569	1596	610936	-2.09517	3.84518	0.973285	0.323862
chr1	8823467	8826204	2738	chr1	9484561	9488337	3777	661613	-2.09517	3.84518	0.973285	0.323862
chr1	8823467	8826204	2738	chr1	9597661	9600208	2548	774099	-2.09501	3.84509	0.973196	0.323884
chr1	8823467	8826204	2738	chr1	9687977	9691246	3270	864776	-2.09501	3.84509	0.973196	0.323884
chr1	8823467	8826204	2738	chr1	9740271	9742218	1948	916409	-2.09517	3.84518	0.973285	0.323862
chr1	8823467	8826204	2738	chr1	9907425	9912111	4687	1084932	-2.91537	3.99583	1.92392	0.165425
chr1	8839496	8841869	2374	chr1	8876111	8879195	3085	36970	1.52966	4.49457	1.72444	0.189122
chr1	8839496	8841869	2374	chr1	8937383	8940454	3072	98236	-0.340932	4.47494	0.08065	0.776419
chr1	8839496	8841869	2374	chr1	9067242	9072046	4805	228961	0.513182	3.9951	0.0944795	0.758558
chr1	8839496	8841869	2374	chr1	9126987	9130377	3391	287999	-2.09517	3.84518	0.973285	0.323862
chr1	8839496	8841869	2374	chr1	9134858	9136911	2054	295202	-2.09517	3.84518	0.973285	0.323862
chr1	8839496	8841869	2374	chr1	9137906	9143657	5752	300099	-2.09517	3.84518	0.973285	0.323862
chr1	8839496	8841869	2374	chr1	9434974	9436569	1596	595089	-2.09501	3.84509	0.973196	0.323884
chr1	8839496	8841869	2374	chr1	9597661	9600208	2548	758252	-2.09517	3.84518	0.973285	0.323862
chr1	8839496	8841869	2374	chr1	9647906	9651638	3733	809089	2.60836	3.84426	1.8518	0.173574
chr1	8876111	8879195	3085	chr1	8937383	8940454	3072	61265	-0.110219	4.66447	0.0105271	0.918279
chr1	8876111	8879195	3085	chr1	9045973	9048387	2415	169527	1.38051	4.13056	0.870365	0.350854
chr1	8876111	8879195	3085	chr1	9067242	9072046	4805	191991	-0.307339	4.13145	0.0400697	0.841344
chr1	8876111	8879195	3085	chr1	9121437	9125548	4112	245839	-2.09501	3.84509	0.973196	0.323884
chr1	8876111	8879195	3085	chr1	9126987	9130377	3391	251029	-2.09517	3.84518	0.973285	0.323862
chr1	8876111	8879195	3085	chr1	9134858	9136911	2054	258231	0.51335	3.99501	0.0945291	0.758496
chr1	8876111	8879195	3085	chr1	9137906	9143657	5752	263128	-1.50963	4.47578	1.30005	0.254204
chr1	8876111	8879195	3085	chr1	9188731	9190607	1877	312016	-2.09501	3.84509	0.973196	0.323884
chr1	8876111	8879195	3085	chr1	9440568	9441891	1324	563576	-2.09517	3.84518	0.973285	0.323862
chr1	8876111	8879195	3085	chr1	9484561	9488337	3777	608796	-2.91569	3.99601	1.92426	0.165388
chr1	8876111	8879195	3085	chr1	9628452	9630984	2533	752065	-2.09501	3.84509	0.973196	0.323884
chr1	8876111	8879195	3085	chr1	9711253	9715818	4566	835882	2.60836	3.84426	1.8518	0.173574
chr1	8876111	8879195	3085	chr1	9907425	9912111	4687	1032115	-2.09501	3.84509	0.973196	0.323884
chr1	8876111	8879195	3085	chr1	10009103	10012132	3030	1132964	2.60836	3.84426	1.8518	0.173574
chr1	8937383	8940454	3072	chr1	9045973	9048387	2415	108261	-1.28881	4.83294	1.46204	0.226605
chr1	8937383	8940454	3072	chr1	9058799	9060453	1655	120707	0.513182	3.9951	0.0944795	0.758558
chr1	8937383	8940454	3072	chr1	9067242	9072046	4805	130725	0.546882	5.45449	0.551793	0.457586
chr1	8937383	8940454	3072	chr1	9096675	9099697	3023	159267	2.60836	3.84426	1.8518	0.173574
chr1	8937383	8940454	3072	chr1	9121437	9125548	4112	184574	-4.36732	4.47671	5.52544	0.0187419
chr1	8937383	8940454	3072	chr1	9126987	9130377	3391	189763	0.927134	4.76998	0.87862	0.34858
chr1	8937383	8940454	3072	chr1	9134858	9136911	2054	196966	1.96813	4.27543	2.04987	0.152219
chr1	8937383	8940454	3072	chr1	9137906	9143657	5752	201863	0.35637	5.04922	0.171434	0.67884
chr1	8937383	8940454	3072	chr1	9202869	9204309	1441	264670	-2.09517	3.84518	0.973285	0.323862
chr1	8937383	8940454	3072	chr1	9294155	9296678	2524	356498	-2.91553	3.99592	1.92409	0.165407
chr1	8937383	8940454	3072	chr1	9401998	9403822	1825	463991	-2.09501	3.84509	0.973196	0.323884
chr1	8937383	8940454	3072	chr1	9422394	9424429	2036	484493	2.66682	3.86614	1.9005	0.168022
chr1	8937383	8940454	3072	chr1	9440568	9441891	1324	502311	-2.09501	3.84509	0.973196	0.323884
chr1	8937383	8940454	3072	chr1	9464736	9467982	3247	527440	-2.09501	3.84509	0.973196	0.323884
chr1	8937383	8940454	3072	chr1	9479498	9481290	1793	541475	-0.248715	4.15296	0.0278792	0.867393
chr1	8937383	8940454	3072	chr1	9484561	9488337	3777	547530	-3.43554	4.13234	2.85402	0.0911457
chr1	8937383	8940454	3072	chr1	9575303	9577567	2265	637516	-2.09517	3.84518	0.973285	0.323862
chr1	8937383	8940454	3072	chr1	9647906	9651638	3733	710853	-2.09501	3.84509	0.973196	0.323884
chr1	8937383	8940454	3072	chr1	9687977	9691246	3270	750693	2.60836	3.84426	1.8518	0.173574
chr1	8937383	8940454	3072	chr1	9711253	9715818	4566	774617	0.51335	3.99501	0.0945291	0.758496
chr1	8937383	8940454	3072	chr1	9740271	9742218	1948	802326	2.60836	3.84426	1.8518	0.173574
chr1	8937383	8940454	3072	chr1	10531332	10536785	5454	1595140	-2.91553	3.99592	1.92409	0.165407
chr1	9045973	9048387	2415	chr1	9058799	9060453	1655	12446	0.51335	3.99501	0.0945291	0.758496
chr1	9045973	9048387	2415	chr1	9067242	9072046	4805	22464	1.2097	5.50197	2.75508	0.0969457
chr1	9045973	9048387	2415	chr1	9096675	9099697	3023	51006	0.559985	4.25496	0.176586	0.674324
chr1	9045973	9048387	2415	chr1	9121437	9125548	4112	76312	-0.307013	4.13128	0.0399955	0.841489
chr1	9045973	9048387	2415	chr1	9134858	9136911	2054	88704	-0.340932	4.47494	0.08065	0.776419
chr1	9045973	9048387	2415	chr1	9137906	9143657	5752	93601	-2.32021	4.83372	3.73704	0.0532186
chr1	9045973	9048387	2415	chr1	9484561	9488337	3777	439269	-2.91553	3.99592	1.92409	0.165407
chr1	9045973	9048387	2415	chr1	9687977	9691246	3270	642431	-2.09517	3.84518	0.973285	0.323862
chr1	9045973	9048387	2415	chr1	9746649	9748796	2148	700542	-2.09517	3.84518	0.973285	0.323862
chr1	9045973	9048387	2415	chr1	9895552	9897379	1828	849285	-2.09517	3.84518	0.973285	0.323862
chr1	9045973	9048387	2415	chr1	10009103	10012132	3030	963437	-2.09517	3.84518	0.973285	0.323862
chr1	9058799	9060453	1655	chr1	9067242	9072046	4805	10018	-1.73337	5.05179	2.93416	0.086724
chr1	9058799	9060453	1655	chr1	9096675	9099697	3023	38560	2.60836	3.84426	1.8518	0.173574
chr1	9058799	9060453	1655	chr1	9121437	9125548	4112	63866	2.60836	3.84426	1.8518	0.173574
chr1	9058799	9060453	1655	chr1	9126987	9130377	3391	69056	-2.91553	3.99592	1.92409	0.165407
chr1	9058799	9060453	1655	chr1	9134858	9136911	2054	76258	-1.50948	4.4757	1.2998	0.254251
chr1	9058799	9060453	1655	chr1	9137906	9143657	5752	81155	-1.75853	4.57403	1.87434	0.170979
chr1	9058799	9060453	1655	chr1	9158320	9159723	1404	99395	2.60836	3.84426	1.8518	0.173574
chr1	9058799	9060453	1655	chr1	9472046	9475771	3726	414282	0.51335	3.99501	0.0945291	0.758496
chr1	9058799	9060453	1655	chr1	9479498	9481290	1793	420768	-2.09501	3.84509	0.973196	0.323884
chr1	9058799	9060453	1655	chr1	9775804	9779669	3866	718110	-2.09501	3.84509	0.973196	0.323884
chr1	9058799	9060453	1655	chr1	9846197	9848701	2505	787823	-2.09517	3.84518	0.973285	0.323862
chr1	9058799	9060453	1655	chr1	10009103	10012132	3030	950991	-2.09517	3.84518	0.973285	0.323862
chr1	9067242	9072046	4805	chr1	9096675	9099697	3023	28542	0.822062	5.45375	1.24654	0.264215
chr1	9067242	9072046	4805	chr1	9121437	9125548	4112	53848	0.271575	6.05953	0.188024	0.664566
chr1	9067242	9072046	4805	chr1	9126987	9130377	3391	59038	0.831067	5.76389	1.50671	0.219642
chr1	9067242	9072046	4805	chr1	9134858	9136911	2054	66240	0.169661	6.13767	0.0778306	0.780259
chr1	9067242	9072046	4805	chr1	9137906	9143657	5752	71137	0.170966	7.45459	0.132439	0.715916
chr1	9067242	9072046	4805	chr1	9158320	9159723	1404	89377	-2.60082	4.98331	5.02015	0.0250541
chr1	9067242	9072046	4805	chr1	9188731	9190607	1877	120025	-0.307176	4.13137	0.0400325	0.841417
chr1	9067242	9072046	4805	chr1	9202869	9204309	1441	133945	-0.307176	4.13137	0.0400325	0.841417
chr1	9067242	9072046	4805	chr1	9234454	9236482	2029	165824	-2.09501	3.84509	0.973196	0.323884
chr1	9067242	9072046	4805	chr1	9294155	9296678	2524	225772	-0.307176	4.13137	0.0400325	0.841417
chr1	9067242	9072046	4805	chr1	9401998	9403822	1825	333266	2.60836	3.84426	1.8518	0.173574
chr1	9067242	9072046	4805	chr1	9440568	9441891	1324	371585	-2.09501	3.84509	0.973196	0.323884
chr1	9067242	9072046	4805	chr1	9464736	9467982	3247	396715	0.0402943	4.36923	0.00112977	0.973186
chr1	9067242	9072046	4805	chr1	9472046	9475771	3726	404264	0.560148	4.25488	0.176678	0.674244
chr1	9067242	9072046	4805	chr1	9479498	9481290	1793	410750	0.51335	3.99501	0.0945291	0.758496
chr1	9067242	9072046	4805	chr1	9484561	9488337	3777	416805	-0.0547059	4.68536	0.00280281	0.957778
chr1	9067242	9072046	4805	chr1	9575303	9577567	2265	506791	-2.09517	3.84518	0.973285	0.323862
chr1	9067242	9072046	4805	chr1	9687977	9691246	3270	619967	-2.91569	3.99601	1.92426	0.165388
chr1	9067242	9072046	4805	chr1	9711253	9715818	4566	643891	2.60836	3.84426	1.8518	0.173574
chr1	9067242	9072046	4805	chr1	9740271	9742218	1948	671600	2.60836	3.84426	1.8518	0.173574
chr1	9067242	9072046	4805	chr1	9746649	9748796	2148	678078	2.60836	3.84426	1.8518	0.173574
chr1	9067242	9072046	4805	chr1	9846197	9848701	2505	777805	0.560148	4.25488	0.176678	0.674244
chr1	9067242	9072046	4805	chr1	9895552	9897379	1828	826821	-2.09501	3.84509	0.973196	0.323884
chr1	9067242	9072046	4805	chr1	9907425	9912111	4687	840124	0.560148	4.25488	0.176678	0.674244
chr1	9067242	9072046	4805	chr1	9922379	9926527	4149	854809	2.60836	3.84426	1.8518	0.173574
chr1	9067242	9072046	4805	chr1	9940361	9942428	2068	871750	2.60836	3.84426	1.8518	0.173574
chr1	9067242	9072046	4805	chr1	10009103	10012132	3030	940973	-2.09517	3.84518	0.973285	0.323862
chr1	9096675	9099697	3023	chr1	9121437	9125548	4112	25306	0.248227	5.54352	0.113727	0.73594
chr1	9096675	9099697	3023	chr1	9126987	9130377	3391	30496	0.171637	5.1151	0.0419724	0.837672
chr1	9096675	9099697	3023	chr1	9134858	9136911	2054	37698	-1.10394	4.75172	1.02604	0.31109
chr1	9096675	9099697	3023	chr1	9137906	9143657	5752	42595	0.628651	5.76706	0.89167	0.345025
chr1	9096675	9099697	3023	chr1	9158320	9159723	1404	60835	3.53261	4.01592	3.72538	0.0535914
chr1	9096675	9099697	3023	chr1	9188731	9190607	1877	91483	-2.09517	3.84518	0.973285	0.323862
chr1	9096675	9099697	3023	chr1	9234454	9236482	2029	137282	2.60836	3.84426	1.8518	0.173574
chr1	9096675	9099697	3023	chr1	9294155	9296678	2524	197230	2.66682	3.86614	1.9005	0.168022
chr1	9096675	9099697	3023	chr1	9464736	9467982	3247	368173	2.60836	3.84426	1.8518	0.173574
chr1	9096675	9099697	3023	chr1	9472046	9475771	3726	375722	0.513182	3.9951	0.0944795	0.758558
chr1	9096675	9099697	3023	chr1	9484561	9488337	3777	388263	-2.09501	3.84509	0.973196	0.323884
chr1	9096675	9099697	3023	chr1	9628452	9630984	2533	531532	-2.09517	3.84518	0.973285	0.323862
chr1	9096675	9099697	3023	chr1	9775804	9779669	3866	679550	0.559985	4.25496	0.176586	0.674324
chr1	9121437	9125548	4112	chr1	9126987	9130377	3391	5189	-0.914305	6.61346	2.54233	0.110831
chr1	9121437	9125548	4112	chr1	9134858	9136911	2054	12392	-0.104032	6.04236	0.026547	0.870572
chr1	9121437	9125548	4112	chr1	9137906	9143657	5752	17289	0.243526	7.29265	0.255837	0.612995
chr1	9121437	9125548	4112	chr1	9158320	9159723	1404	35529	1.96796	4.27552	2.04955	0.152251
chr1	9121437	9125548	4112	chr1	9188731	9190607	1877	66176	-2.09517	3.84518	0.973285	0.323862
chr1	9121437	9125548	4112	chr1	9202869	9204309	1441	80096	-2.09517	3.84518	0.973285	0.323862
chr1	9121437	9125548	4112	chr1	9401998	9403822	1825	279417	-2.09501	3.84509	0.973196	0.323884
chr1	9121437	9125548	4112	chr1	9434974	9436569	1596	312279	2.60836	3.84426	1.8518	0.173574
chr1	9121437	9125548	4112	chr1	9440568	9441891	1324	317737	-2.09517	3.84518	0.973285	0.323862
chr1	9121437	9125548	4112	chr1	9464736	9467982	3247	342866	0.513182	3.9951	0.0944795	0.758558
chr1	9121437	9125548	4112	chr1	9472046	9475771	3726	350416	-2.09517	3.84518	0.973285	0.323862
chr1	9121437	9125548	4112	chr1	9484561	9488337	3777	362956	0.51335	3.99501	0.0945291	0.758496
chr1	9121437	9125548	4112	chr1	9711253	9715818	4566	590043	3.53261	4.01592	3.72538	0.0535914
chr1	9121437	9125548	4112	chr1	9775804	9779669	3866	654244	-2.09501	3.84509	0.973196	0.323884
chr1	9121437	9125548	4112	chr1	9846197	9848701	2505	723956	-3.43539	4.13226	2.85378	0.0911595
chr1	9121437	9125548	4112	chr1	9881709	9884826	3118	759775	-2.09517	3.84518	0.973285	0.323862
chr1	9121437	9125548	4112	chr1	10457928	10460418	2491	1335680	2.60836	3.84426	1.8518	0.173574
chr1	9121437	9125548	4112	chr1	10752673	10753939	1267	1629813	2.60836	3.84426	1.8518	0.173574
chr1	9126987	9130377	3391	chr1	9134858	9136911	2054	7202	-0.302717	7.04914	0.347846	0.555335
chr1	9126987	9130377	3391	chr1	9137906	9143657	5752	12099	-0.375251	7.90312	0.693205	0.405076
chr1	9126987	9130377	3391	chr1	9158320	9159723	1404	30339	-0.82703	4.25575	0.330401	0.565423
chr1	9126987	9130377	3391	chr1	9188731	9190607	1877	60987	-2.09501	3.84509	0.973196	0.323884
chr1	9126987	9130377	3391	chr1	9202869	9204309	1441	74907	2.60836	3.84426	1.8518	0.173574
chr1	9126987	9130377	3391	chr1	9234454	9236482	2029	106786	0.571811	4.01675	0.112403	0.737425
chr1	9126987	9130377	3391	chr1	9294155	9296678	2524	166734	0.571643	4.01684	0.112349	0.737485
chr1	9126987	9130377	3391	chr1	9422394	9424429	2036	294729	-2.09517	3.84518	0.973285	0.323862
chr1	9126987	9130377	3391	chr1	9464736	9467982	3247	337677	0.513182	3.9951	0.0944795	0.758558
chr1	9126987	9130377	3391	chr1	9484561	9488337	3777	357767	-2.91553	3.99592	1.92409	0.165407
chr1	9126987	9130377	3391	chr1	9687977	9691246	3270	560929	-2.09501	3.84509	0.973196	0.323884
chr1	9126987	9130377	3391	chr1	9746649	9748796	2148	619040	-2.09517	3.84518	0.973285	0.323862
chr1	9126987	9130377	3391	chr1	9775804	9779669	3866	649054	-0.307339	4.13145	0.0400697	0.841344
chr1	9126987	9130377	3391	chr1	9846197	9848701	2505	718767	-2.09517	3.84518	0.973285	0.323862
chr1	9126987	9130377	3391	chr1	9895552	9897379	1828	767783	2.60836	3.84426	1.8518	0.173574
chr1	9126987	9130377	3391	chr1	9907425	9912111	4687	781086	-0.307176	4.13137	0.0400325	0.841417
chr1	9126987	9130377	3391	chr1	9922379	9926527	4149	795771	-3.43554	4.13234	2.85402	0.0911457
chr1	9126987	9130377	3391	chr1	10457928	10460418	2491	1330491	-2.09501	3.84509	0.973196	0.323884
chr1	9126987	9130377	3391	chr1	10531332	10536785	5454	1405376	0.513182	3.9951	0.0944795	0.758558
chr1	9134858	9136911	2054	chr1	9158320	9159723	1404	23137	-3.43507	4.13208	2.85329	0.0911873
chr1	9134858	9136911	2054	chr1	9188731	9190607	1877	53784	-0.826872	4.25566	0.330286	0.565491
chr1	9134858	9136911	2054	chr1	9234454	9236482	2029	99583	-2.09501	3.84509	0.973196	0.323884
chr1	9134858	9136911	2054	chr1	9294155	9296678	2524	159532	-3.43523	4.13217	2.85353	0.0911734
chr1	9134858	9136911	2054	chr1	9422394	9424429	2036	287527	-2.09501	3.84509	0.973196	0.323884
chr1	9134858	9136911	2054	chr1	9464736	9467982	3247	330474	1.38051	4.13056	0.870365	0.350854
chr1	9134858	9136911	2054	chr1	9479498	9481290	1793	344509	3.47568	3.9942	3.63313	0.0566402
chr1	9134858	9136911	2054	chr1	9484561	9488337	3777	350564	-0.82703	4.25575	0.330401	0.565423
chr1	9134858	9136911	2054	chr1	9647906	9651638	3733	513887	2.60836	3.84426	1.8518	0.173574
chr1	9134858	9136911	2054	chr1	9711253	9715818	4566	577651	-2.09517	3.84518	0.973285	0.323862
chr1	9134858	9136911	2054	chr1	9846197	9848701	2505	711564	-2.09501	3.84509	0.973196	0.323884
chr1	9134858	9136911	2054	chr1	9881709	9884826	3118	747383	2.66682	3.86614	1.9005	0.168022
chr1	9134858	9136911	2054	chr1	9907425	9912111	4687	773883	-2.91553	3.99592	1.92409	0.165407
chr1	9134858	9136911	2054	chr1	9922379	9926527	4149	788568	-2.91537	3.99583	1.92392	0.165425
chr1	9137906	9143657	5752	chr1	9158320	9159723	1404	18240	0.291513	5.55182	0.166696	0.683065
chr1	9137906	9143657	5752	chr1	9188731	9190607	1877	48887	-0.891209	4.6652	0.634903	0.425563
chr1	9137906	9143657	5752	chr1	9202869	9204309	1441	62807	-2.91537	3.99583	1.92392	0.165425
chr1	9137906	9143657	5752	chr1	9234454	9236482	2029	94686	0.513182	3.9951	0.0944795	0.758558
chr1	9137906	9143657	5752	chr1	9294155	9296678	2524	154635	0.572394	4.4741	0.248366	0.618228
chr1	9137906	9143657	5752	chr1	9401998	9403822	1825	262128	0.51335	3.99501	0.0945291	0.758496
chr1	9137906	9143657	5752	chr1	9422394	9424429	2036	282630	3.47568	3.9942	3.63313	0.0566402
chr1	9137906	9143657	5752	chr1	9434974	9436569	1596	294990	1.38051	4.13056	0.870365	0.350854
chr1	9137906	9143657	5752	chr1	9464736	9467982	3247	325577	0.560148	4.25488	0.176678	0.674244
chr1	9137906	9143657	5752	chr1	9472046	9475771	3726	333127	-0.340778	4.47486	0.0805815	0.776511
chr1	9137906	9143657	5752	chr1	9479498	9481290	1793	339612	0.0402943	4.36923	0.00112977	0.973186
chr1	9137906	9143657	5752	chr1	9484561	9488337	3777	345667	1.02586	4.97895	1.33982	0.247065
chr1	9137906	9143657	5752	chr1	9597661	9600208	2548	458153	0.513182	3.9951	0.0944795	0.758558
chr1	9137906	9143657	5752	chr1	9628452	9630984	2533	488936	-0.307176	4.13137	0.0400325	0.841417
chr1	9137906	9143657	5752	chr1	9647906	9651638	3733	508990	-2.91553	3.99592	1.92409	0.165407
chr1	9137906	9143657	5752	chr1	9687977	9691246	3270	548830	1.91262	4.254	1.94772	0.162832
chr1	9137906	9143657	5752	chr1	9711253	9715818	4566	572754	1.38067	4.13048	0.870548	0.350804
chr1	9137906	9143657	5752	chr1	9733380	9734698	1319	593257	-2.09501	3.84509	0.973196	0.323884
chr1	9137906	9143657	5752	chr1	9746649	9748796	2148	606941	2.60836	3.84426	1.8518	0.173574
chr1	9137906	9143657	5752	chr1	9775804	9779669	3866	636955	-2.09517	3.84518	0.973285	0.323862
chr1	9137906	9143657	5752	chr1	9881709	9884826	3118	742486	-2.09517	3.84518	0.973285	0.323862
chr1	9137906	9143657	5752	chr1	9907425	9912111	4687	768986	-0.642459	4.57344	0.310011	0.577674
chr1	9137906	9143657	5752	chr1	9922379	9926527	4149	783671	1.43761	4.15206	0.932795	0.334138
chr1	9137906	9143657	5752	chr1	10009103	10012132	3030	869836	-2.09501	3.84509	0.973196	0.323884
chr1	9137906	9143657	5752	chr1	10752673	10753939	1267	1612524	2.60836	3.84426	1.8518	0.173574
chr1	9137906	9143657	5752	chr1	11098488	11100303	1816	1958614	-2.09517	3.84518	0.973285	0.323862
chr1	9158320	9159723	1404	chr1	9188731	9190607	1877	30647	2.60836	3.84426	1.8518	0.173574
chr1	9158320	9159723	1404	chr1	9202869	9204309	1441	44567	-2.09501	3.84509	0.973196	0.323884
chr1	9158320	9159723	1404	chr1	9484561	9488337	3777	327427	-2.09501	3.84509	0.973196	0.323884
chr1	9158320	9159723	1404	chr1	9575303	9577567	2265	417413	-2.09517	3.84518	0.973285	0.323862
chr1	9188731	9190607	1877	chr1	9202869	9204309	1441	13920	2.60836	3.84426	1.8518	0.173574
chr1	9188731	9190607	1877	chr1	9294155	9296678	2524	105747	-2.09501	3.84509	0.973196	0.323884
chr1	9188731	9190607	1877	chr1	9484561	9488337	3777	296780	3.47568	3.9942	3.63313	0.0566402
chr1	9188731	9190607	1877	chr1	9628452	9630984	2533	440049	-2.09517	3.84518	0.973285	0.323862
chr1	9188731	9190607	1877	chr1	9775804	9779669	3866	588067	2.60836	3.84426	1.8518	0.173574
chr1	9188731	9190607	1877	chr1	9846197	9848701	2505	657780	-2.09517	3.84518	0.973285	0.323862
chr1	9202869	9204309	1441	chr1	9472046	9475771	3726	270319	-2.09501	3.84509	0.973196	0.323884
chr1	9202869	9204309	1441	chr1	9484561	9488337	3777	282860	2.60836	3.84426	1.8518	0.173574
chr1	9202869	9204309	1441	chr1	9711253	9715818	4566	509946	2.60836	3.84426	1.8518	0.173574
chr1	9234454	9236482	2029	chr1	9294155	9296678	2524	59948	-2.09501	3.84509	0.973196	0.323884
chr1	9234454	9236482	2029	chr1	9401998	9403822	1825	167442	-2.09517	3.84518	0.973285	0.323862
chr1	9234454	9236482	2029	chr1	9484561	9488337	3777	250981	0.513182	3.9951	0.0944795	0.758558
chr1	9234454	9236482	2029	chr1	9597661	9600208	2548	363466	-2.09501	3.84509	0.973196	0.323884
chr1	9234454	9236482	2029	chr1	9628452	9630984	2533	394250	-2.09517	3.84518	0.973285	0.323862
chr1	9234454	9236482	2029	chr1	9647906	9651638	3733	414304	-2.09501	3.84509	0.973196	0.323884
chr1	9234454	9236482	2029	chr1	9907425	9912111	4687	674300	-2.91569	3.99601	1.92426	0.165388
chr1	9294155	9296678	2524	chr1	9440568	9441891	1324	145813	-2.91553	3.99592	1.92409	0.165407
chr1	9294155	9296678	2524	chr1	9464736	9467982	3247	170942	-3.43539	4.13226	2.85378	0.0911595
chr1	9294155	9296678	2524	chr1	9479498	9481290	1793	184977	-2.09517	3.84518	0.973285	0.323862
chr1	9294155	9296678	2524	chr1	9484561	9488337	3777	191032	-2.91553	3.99592	1.92409	0.165407
chr1	9294155	9296678	2524	chr1	9647906	9651638	3733	354355	-2.09501	3.84509	0.973196	0.323884
chr1	9294155	9296678	2524	chr1	9711253	9715818	4566	418119	2.60836	3.84426	1.8518	0.173574
chr1	9294155	9296678	2524	chr1	9746649	9748796	2148	452306	-2.09501	3.84509	0.973196	0.323884
chr1	9294155	9296678	2524	chr1	9846197	9848701	2505	552032	0.51335	3.99501	0.0945291	0.758496
chr1	9294155	9296678	2524	chr1	9907425	9912111	4687	614351	2.60836	3.84426	1.8518	0.173574
chr1	9294155	9296678	2524	chr1	10092546	10095119	2574	798416	-2.09501	3.84509	0.973196	0.323884
chr1	9294155	9296678	2524	chr1	10531332	10536785	5454	1238642	2.60836	3.84426	1.8518	0.173574
chr1	9294155	9296678	2524	chr1	11071531	11074085	2555	1777391	-2.09517	3.84518	0.973285	0.323862
chr1	9401998	9403822	1825	chr1	9422394	9424429	2036	20501	-0.307176	4.13137	0.0400325	0.841417
chr1	9401998	9403822	1825	chr1	9434974	9436569	1596	32861	-2.09501	3.84509	0.973196	0.323884
chr1	9401998	9403822	1825	chr1	9464736	9467982	3247	63449	-2.09501	3.84509	0.973196	0.323884
chr1	9401998	9403822	1825	chr1	9472046	9475771	3726	70998	-2.09517	3.84518	0.973285	0.323862
chr1	9401998	9403822	1825	chr1	9484561	9488337	3777	83539	0.513182	3.9951	0.0944795	0.758558
chr1	9401998	9403822	1825	chr1	9711253	9715818	4566	310625	-2.09517	3.84518	0.973285	0.323862
chr1	9401998	9403822	1825	chr1	9846197	9848701	2505	444539	-2.09501	3.84509	0.973196	0.323884
chr1	9401998	9403822	1825	chr1	10092546	10095119	2574	690922	-2.09517	3.84518	0.973285	0.323862
chr1	9422394	9424429	2036	chr1	9434974	9436569	1596	12360	0.51335	3.99501	0.0945291	0.758496
chr1	9422394	9424429	2036	chr1	9440568	9441891	1324	17818	-0.307013	4.13128	0.0399955	0.841489
chr1	9422394	9424429	2036	chr1	9464736	9467982	3247	42947	4.06313	4.15125	5.48097	0.0192246
chr1	9422394	9424429	2036	chr1	9472046	9475771	3726	50497	-2.91537	3.99583	1.92392	0.165425
chr1	9422394	9424429	2036	chr1	9479498	9481290	1793	56982	2.60836	3.84426	1.8518	0.173574
chr1	9422394	9424429	2036	chr1	9484561	9488337	3777	63037	-0.307176	4.13137	0.0400325	0.841417
chr1	9422394	9424429	2036	chr1	9711253	9715818	4566	290124	2.60836	3.84426	1.8518	0.173574
chr1	9434974	9436569	1596	chr1	9440568	9441891	1324	5458	-0.307176	4.13137	0.0400325	0.841417
chr1	9434974	9436569	1596	chr1	9464736	9467982	3247	30587	-0.585227	4.59431	0.259297	0.610603
chr1	9434974	9436569	1596	chr1	9472046	9475771	3726	38137	0.513182	3.9951	0.0944795	0.758558
chr1	9434974	9436569	1596	chr1	9484561	9488337	3777	50677	3.47568	3.9942	3.63313	0.0566402
chr1	9434974	9436569	1596	chr1	9907425	9912111	4687	473996	2.66682	3.86614	1.9005	0.168022
chr1	9440568	9441891	1324	chr1	9464736	9467982	3247	25129	-1.50948	4.4757	1.2998	0.254251
chr1	9440568	9441891	1324	chr1	9472046	9475771	3726	32679	2.60836	3.84426	1.8518	0.173574
chr1	9440568	9441891	1324	chr1	9484561	9488337	3777	45219	0.191317	4.57237	0.0309513	0.860349
chr1	9440568	9441891	1324	chr1	9647906	9651638	3733	208542	-2.09501	3.84509	0.973196	0.323884
chr1	9440568	9441891	1324	chr1	10531332	10536785	5454	1092829	-2.09501	3.84509	0.973196	0.323884
chr1	9440568	9441891	1324	chr1	11286000	11289944	3945	1846742	-2.09501	3.84509	0.973196	0.323884
chr1	9464736	9467982	3247	chr1	9472046	9475771	3726	7549	0.50593	6.21488	0.715232	0.397712
chr1	9464736	9467982	3247	chr1	9479498	9481290	1793	14035	1.16309	5.19622	2.01215	0.156044
chr1	9464736	9467982	3247	chr1	9484561	9488337	3777	20090	-0.43938	5.99193	0.45697	0.499044
chr1	9464736	9467982	3247	chr1	9597661	9600208	2548	132575	2.60836	3.84426	1.8518	0.173574
chr1	9464736	9467982	3247	chr1	9628452	9630984	2533	163359	2.60836	3.84426	1.8518	0.173574
chr1	9464736	9467982	3247	chr1	9647906	9651638	3733	183413	2.60836	3.84426	1.8518	0.173574
chr1	9464736	9467982	3247	chr1	9687977	9691246	3270	223252	-2.09501	3.84509	0.973196	0.323884
chr1	9464736	9467982	3247	chr1	9740271	9742218	1948	274885	0.51335	3.99501	0.0945291	0.758496
chr1	9464736	9467982	3247	chr1	9775804	9779669	3866	311377	3.47568	3.9942	3.63313	0.0566402
chr1	9464736	9467982	3247	chr1	9846197	9848701	2505	381090	2.60836	3.84426	1.8518	0.173574
chr1	9464736	9467982	3247	chr1	9881709	9884826	3118	416908	2.60836	3.84426	1.8518	0.173574
chr1	9464736	9467982	3247	chr1	9907425	9912111	4687	443409	2.60836	3.84426	1.8518	0.173574
chr1	9464736	9467982	3247	chr1	9922379	9926527	4149	458094	2.60836	3.84426	1.8518	0.173574
chr1	9464736	9467982	3247	chr1	9932609	9934375	1767	467133	-2.09501	3.84509	0.973196	0.323884
chr1	9464736	9467982	3247	chr1	11286000	11289944	3945	1821613	-2.09517	3.84518	0.973285	0.323862
chr1	9472046	9475771	3726	chr1	9479498	9481290	1793	6485	-1.08026	5.5744	1.89366	0.168789
chr1	9472046	9475771	3726	chr1	9484561	9488337	3777	12540	-0.451676	5.82871	0.430681	0.511655
chr1	9472046	9475771	3726	chr1	9597661	9600208	2548	125026	2.60836	3.84426	1.8518	0.173574
chr1	9472046	9475771	3726	chr1	9775804	9779669	3866	303828	-2.91569	3.99601	1.92426	0.165388
chr1	9472046	9475771	3726	chr1	9846197	9848701	2505	373540	2.60836	3.84426	1.8518	0.173574
chr1	9472046	9475771	3726	chr1	9907425	9912111	4687	435859	2.60836	3.84426	1.8518	0.173574
chr1	9472046	9475771	3726	chr1	9922379	9926527	4149	450544	-2.91553	3.99592	1.92409	0.165407
chr1	9472046	9475771	3726	chr1	10002037	10004636	2600	529428	2.60836	3.84426	1.8518	0.173574
chr1	9472046	9475771	3726	chr1	11105669	11107321	1653	1632586	-2.09517	3.84518	0.973285	0.323862
chr1	9472046	9475771	3726	chr1	11158677	11160770	2094	1685815	-2.09501	3.84509	0.973196	0.323884
chr1	9472046	9475771	3726	chr1	11465995	11469273	3279	1993725	2.60836	3.84426	1.8518	0.173574
chr1	9479498	9481290	1793	chr1	9484561	9488337	3777	6055	-0.502554	5.5536	0.45322	0.50081
chr1	9479498	9481290	1793	chr1	9647906	9651638	3733	169378	-2.09501	3.84509	0.973196	0.323884
chr1	9479498	9481290	1793	chr1	9711253	9715818	4566	233141	-2.09501	3.84509	0.973196	0.323884
chr1	9479498	9481290	1793	chr1	9746649	9748796	2148	267328	2.60836	3.84426	1.8518	0.173574
chr1	9479498	9481290	1793	chr1	9907425	9912111	4687	429374	-3.8163	4.25637	3.76235	0.052419
chr1	9479498	9481290	1793	chr1	10531332	10536785	5454	1053664	-2.09501	3.84509	0.973196	0.323884
chr1	9484561	9488337	3777	chr1	9575303	9577567	2265	89986	0.513182	3.9951	0.0944795	0.758558
chr1	9484561	9488337	3777	chr1	9597661	9600208	2548	112485	1.38051	4.13056	0.870365	0.350854
chr1	9484561	9488337	3777	chr1	9647906	9651638	3733	163323	0.571643	4.01684	0.112349	0.737485
chr1	9484561	9488337	3777	chr1	9687977	9691246	3270	203162	2.60836	3.84426	1.8518	0.173574
chr1	9484561	9488337	3777	chr1	9711253	9715818	4566	227086	0.560148	4.25488	0.176678	0.674244
chr1	9484561	9488337	3777	chr1	9740271	9742218	1948	254795	2.60836	3.84426	1.8518	0.173574
chr1	9484561	9488337	3777	chr1	9746649	9748796	2148	261273	2.60836	3.84426	1.8518	0.173574
chr1	9484561	9488337	3777	chr1	9775804	9779669	3866	291287	-2.91537	3.99583	1.92392	0.165425
chr1	9484561	9488337	3777	chr1	9881709	9884826	3118	396818	-2.91553	3.99592	1.92409	0.165407
chr1	9484561	9488337	3777	chr1	9907425	9912111	4687	423319	0.51335	3.99501	0.0945291	0.758496
chr1	9484561	9488337	3777	chr1	9940361	9942428	2068	454945	-2.09517	3.84518	0.973285	0.323862
chr1	9484561	9488337	3777	chr1	10002037	10004636	2600	516887	2.60836	3.84426	1.8518	0.173574
chr1	9484561	9488337	3777	chr1	10092546	10095119	2574	607383	2.60836	3.84426	1.8518	0.173574
chr1	9484561	9488337	3777	chr1	10531332	10536785	5454	1047609	-2.09501	3.84509	0.973196	0.323884
chr1	9484561	9488337	3777	chr1	11321479	11323492	2014	1836036	-2.91537	3.99583	1.92392	0.165425
chr1	9575303	9577567	2265	chr1	9597661	9600208	2548	22499	-2.09501	3.84509	0.973196	0.323884
chr1	9575303	9577567	2265	chr1	9687977	9691246	3270	113176	2.60836	3.84426	1.8518	0.173574
chr1	9575303	9577567	2265	chr1	9922379	9926527	4149	348018	2.60836	3.84426	1.8518	0.173574
chr1	9597661	9600208	2548	chr1	9628452	9630984	2533	30783	-3.43507	4.13208	2.85329	0.0911873
chr1	9597661	9600208	2548	chr1	9647906	9651638	3733	50837	-0.307013	4.13128	0.0399955	0.841489
chr1	9597661	9600208	2548	chr1	9687977	9691246	3270	90677	-2.09517	3.84518	0.973285	0.323862
chr1	9597661	9600208	2548	chr1	9711253	9715818	4566	114601	0.513182	3.9951	0.0944795	0.758558
chr1	9597661	9600208	2548	chr1	9775804	9779669	3866	178802	-2.09501	3.84509	0.973196	0.323884
chr1	9597661	9600208	2548	chr1	9846197	9848701	2505	248514	-2.91569	3.99601	1.92426	0.165388
chr1	9597661	9600208	2548	chr1	9907425	9912111	4687	310833	-2.91569	3.99601	1.92426	0.165388
chr1	9597661	9600208	2548	chr1	10092546	10095119	2574	494898	3.47568	3.9942	3.63313	0.0566402
chr1	9628452	9630984	2533	chr1	9647906	9651638	3733	20054	-4.36718	4.47663	5.52502	0.0187464
chr1	9628452	9630984	2533	chr1	9711253	9715818	4566	83817	-2.09517	3.84518	0.973285	0.323862
chr1	9628452	9630984	2533	chr1	9746649	9748796	2148	118004	-2.09501	3.84509	0.973196	0.323884
chr1	9628452	9630984	2533	chr1	9775804	9779669	3866	148018	3.47568	3.9942	3.63313	0.0566402
chr1	9628452	9630984	2533	chr1	9881709	9884826	3118	253549	-2.09517	3.84518	0.973285	0.323862
chr1	9628452	9630984	2533	chr1	9907425	9912111	4687	280050	-2.91553	3.99592	1.92409	0.165407
chr1	9628452	9630984	2533	chr1	9922379	9926527	4149	294735	-2.09501	3.84509	0.973196	0.323884
chr1	9647906	9651638	3733	chr1	9687977	9691246	3270	39839	-1.50978	4.47586	1.3003	0.254158
chr1	9647906	9651638	3733	chr1	9711253	9715818	4566	63763	-3.81646	4.25645	3.76266	0.0524092
chr1	9647906	9651638	3733	chr1	9740271	9742218	1948	91472	-2.09501	3.84509	0.973196	0.323884
chr1	9647906	9651638	3733	chr1	9746649	9748796	2148	97950	2.60836	3.84426	1.8518	0.173574
chr1	9647906	9651638	3733	chr1	9775804	9779669	3866	127964	0.560311	4.25479	0.176769	0.674165
chr1	9647906	9651638	3733	chr1	9846197	9848701	2505	197677	-0.307013	4.13128	0.0399955	0.841489
chr1	9647906	9651638	3733	chr1	9881709	9884826	3118	233495	0.513182	3.9951	0.0944795	0.758558
chr1	9647906	9651638	3733	chr1	9907425	9912111	4687	259996	1.38051	4.13056	0.870365	0.350854
chr1	9647906	9651638	3733	chr1	9922379	9926527	4149	274681	-2.15627	4.75245	3.10286	0.078155
chr1	9647906	9651638	3733	chr1	10002037	10004636	2600	353564	-2.09501	3.84509	0.973196	0.323884
chr1	9647906	9651638	3733	chr1	10009103	10012132	3030	360845	-2.09501	3.84509	0.973196	0.323884
chr1	9647906	9651638	3733	chr1	10019516	10021792	2277	370882	-2.09517	3.84518	0.973285	0.323862
chr1	9647906	9651638	3733	chr1	10092546	10095119	2574	444060	1.38067	4.13048	0.870548	0.350804
chr1	9647906	9651638	3733	chr1	10531332	10536785	5454	884286	-2.09501	3.84509	0.973196	0.323884
chr1	9647906	9651638	3733	chr1	10752673	10753939	1267	1103534	2.60836	3.84426	1.8518	0.173574
chr1	9687977	9691246	3270	chr1	9711253	9715818	4566	23924	-0.392013	6.00975	0.363106	0.546786
chr1	9687977	9691246	3270	chr1	9733380	9734698	1319	44427	4.00762	4.12967	5.3496	0.020727
chr1	9687977	9691246	3270	chr1	9740271	9742218	1948	51633	-1.50963	4.47578	1.30005	0.254204
chr1	9687977	9691246	3270	chr1	9746649	9748796	2148	58111	-3.81677	4.25662	3.76328	0.0523897
chr1	9687977	9691246	3270	chr1	9775804	9779669	3866	88125	0.793431	5.19689	0.942188	0.331716
chr1	9687977	9691246	3270	chr1	9846197	9848701	2505	157837	-0.82703	4.25575	0.330401	0.565423
chr1	9687977	9691246	3270	chr1	9881709	9884826	3118	193656	-0.307013	4.13128	0.0399955	0.841489
chr1	9687977	9691246	3270	chr1	9895552	9897379	1828	206854	-2.09501	3.84509	0.973196	0.323884
chr1	9687977	9691246	3270	chr1	9907425	9912111	4687	220156	1.77511	4.57095	2.55421	0.110001
chr1	9687977	9691246	3270	chr1	9922379	9926527	4149	234841	-0.341085	4.47502	0.0807184	0.776326
chr1	9687977	9691246	3270	chr1	9932609	9934375	1767	243880	-0.82703	4.25575	0.330401	0.565423
chr1	9687977	9691246	3270	chr1	9940361	9942428	2068	251783	-2.91553	3.99592	1.92409	0.165407
chr1	9687977	9691246	3270	chr1	10002037	10004636	2600	313725	4.00762	4.12967	5.3496	0.020727
chr1	9687977	9691246	3270	chr1	10009103	10012132	3030	321006	2.60836	3.84426	1.8518	0.173574
chr1	9687977	9691246	3270	chr1	10092546	10095119	2574	404221	-2.09517	3.84518	0.973285	0.323862
chr1	9687977	9691246	3270	chr1	10249115	10250717	1603	560304	-2.09501	3.84509	0.973196	0.323884
chr1	9687977	9691246	3270	chr1	10457928	10460418	2491	769561	-2.09501	3.84509	0.973196	0.323884
chr1	9687977	9691246	3270	chr1	10531332	10536785	5454	844447	0.513182	3.9951	0.0944795	0.758558
chr1	9687977	9691246	3270	chr1	11286000	11289944	3945	1598360	2.60836	3.84426	1.8518	0.173574
chr1	9687977	9691246	3270	chr1	11465995	11469273	3279	1778022	-2.09501	3.84509	0.973196	0.323884
chr1	9711253	9715818	4566	chr1	9733380	9734698	1319	20503	0.0402943	4.36923	0.00112977	0.973186
chr1	9711253	9715818	4566	chr1	9740271	9742218	1948	27709	0.0242742	4.83136	0.000727142	0.978487
chr1	9711253	9715818	4566	chr1	9746649	9748796	2148	34187	-1.01223	5.07129	1.14688	0.284204
chr1	9711253	9715818	4566	chr1	9775804	9779669	3866	64201	-1.73388	5.05209	2.93595	0.0866277
chr1	9711253	9715818	4566	chr1	9846197	9848701	2505	133913	0.273024	4.7502	0.0762615	0.782429
chr1	9711253	9715818	4566	chr1	9881709	9884826	3118	169732	0.0402943	4.36923	0.00112977	0.973186
chr1	9711253	9715818	4566	chr1	9895552	9897379	1828	182930	-0.82703	4.25575	0.330401	0.565423
chr1	9711253	9715818	4566	chr1	9907425	9912111	4687	196232	0.482224	5.21754	0.341789	0.558798
chr1	9711253	9715818	4566	chr1	9922379	9926527	4149	210917	-1.7335	5.05186	2.9346	0.0866999
chr1	9711253	9715818	4566	chr1	9932609	9934375	1767	219956	2.60836	3.84426	1.8518	0.173574
chr1	9711253	9715818	4566	chr1	10002037	10004636	2600	289801	-0.82703	4.25575	0.330401	0.565423
chr1	9711253	9715818	4566	chr1	10009103	10012132	3030	297082	-0.307013	4.13128	0.0399955	0.841489
chr1	9711253	9715818	4566	chr1	10092546	10095119	2574	380297	-0.307176	4.13137	0.0400325	0.841417
chr1	9711253	9715818	4566	chr1	10249115	10250717	1603	536380	-2.09501	3.84509	0.973196	0.323884
chr1	9711253	9715818	4566	chr1	10457928	10460418	2491	745637	-2.09517	3.84518	0.973285	0.323862
chr1	9711253	9715818	4566	chr1	10489450	10491688	2239	777033	-2.09501	3.84509	0.973196	0.323884
chr1	9711253	9715818	4566	chr1	10531332	10536785	5454	820523	-3.43539	4.13226	2.85378	0.0911595
chr1	9711253	9715818	4566	chr1	11158677	11160770	2094	1446188	-2.09517	3.84518	0.973285	0.323862
chr1	9733380	9734698	1319	chr1	9746649	9748796	2148	13683	2.60836	3.84426	1.8518	0.173574
chr1	9733380	9734698	1319	chr1	9775804	9779669	3866	43697	1.91262	4.254	1.94772	0.162832
chr1	9733380	9734698	1319	chr1	9907425	9912111	4687	175729	-0.826872	4.25566	0.330286	0.565491
chr1	9733380	9734698	1319	chr1	10009103	10012132	3030	276578	0.513182	3.9951	0.0944795	0.758558
chr1	9740271	9742218	1948	chr1	9746649	9748796	2148	6478	0.572077	4.47426	0.248113	0.618407
chr1	9740271	9742218	1948	chr1	9775804	9779669	3866	36492	1.38051	4.13056	0.870365	0.350854
chr1	9740271	9742218	1948	chr1	9846197	9848701	2505	106204	0.560311	4.25479	0.176769	0.674165
chr1	9740271	9742218	1948	chr1	9907425	9912111	4687	168523	-1.50963	4.47578	1.30005	0.254204
chr1	9740271	9742218	1948	chr1	9922379	9926527	4149	183208	-0.307339	4.13145	0.0400697	0.841344
chr1	9740271	9742218	1948	chr1	9932609	9934375	1767	192247	2.60836	3.84426	1.8518	0.173574
chr1	9740271	9742218	1948	chr1	10002037	10004636	2600	262092	-2.09517	3.84518	0.973285	0.323862
chr1	9740271	9742218	1948	chr1	10009103	10012132	3030	269373	-2.09517	3.84518	0.973285	0.323862
chr1	9740271	9742218	1948	chr1	10531332	10536785	5454	792814	-2.09517	3.84518	0.973285	0.323862
chr1	9746649	9748796	2148	chr1	9775804	9779669	3866	30014	0.572657	4.83072	0.365473	0.545482
chr1	9746649	9748796	2148	chr1	9846197	9848701	2505	99726	0.874035	4.74932	0.786919	0.375033
chr1	9746649	9748796	2148	chr1	9907425	9912111	4687	162045	-0.891644	4.66544	0.635508	0.425342
chr1	9746649	9748796	2148	chr1	9922379	9926527	4149	176730	0.513182	3.9951	0.0944795	0.758558
chr1	9746649	9748796	2148	chr1	10002037	10004636	2600	255614	2.60836	3.84426	1.8518	0.173574
chr1	9746649	9748796	2148	chr1	10009103	10012132	3030	262895	-2.91553	3.99592	1.92409	0.165407
chr1	9746649	9748796	2148	chr1	10457928	10460418	2491	711450	2.60836	3.84426	1.8518	0.173574
chr1	9775804	9779669	3866	chr1	9846197	9848701	2505	69712	0.191163	4.57245	0.0309051	0.860452
chr1	9775804	9779669	3866	chr1	9881709	9884826	3118	105531	0.51335	3.99501	0.0945291	0.758496
chr1	9775804	9779669	3866	chr1	9895552	9897379	1828	118729	-2.91553	3.99592	1.92409	0.165407
chr1	9775804	9779669	3866	chr1	9907425	9912111	4687	132031	0.215246	5.23781	0.0726616	0.7875
chr1	9775804	9779669	3866	chr1	9922379	9926527	4149	146716	0.376558	4.92809	0.166258	0.683459
chr1	9775804	9779669	3866	chr1	9932609	9934375	1767	155755	1.96796	4.27552	2.04955	0.152251
chr1	9775804	9779669	3866	chr1	9940361	9942428	2068	163658	2.60836	3.84426	1.8518	0.173574
chr1	9775804	9779669	3866	chr1	10002037	10004636	2600	225600	-2.91569	3.99601	1.92426	0.165388
chr1	9775804	9779669	3866	chr1	10009103	10012132	3030	232881	0.559985	4.25496	0.176586	0.674324
chr1	9775804	9779669	3866	chr1	10092546	10095119	2574	316096	0.51335	3.99501	0.0945291	0.758496
chr1	9775804	9779669	3866	chr1	10489450	10491688	2239	712832	-2.91553	3.99592	1.92409	0.165407
chr1	9775804	9779669	3866	chr1	11286000	11289944	3945	1510235	-2.09501	3.84509	0.973196	0.323884
chr1	9775804	9779669	3866	chr1	11465995	11469273	3279	1689897	-2.09501	3.84509	0.973196	0.323884
chr1	9846197	9848701	2505	chr1	9881709	9884826	3118	35818	-1.15787	5.3534	1.88184	0.170125
chr1	9846197	9848701	2505	chr1	9895552	9897379	1828	49016	-0.81827	5.17967	0.87212	0.350369
chr1	9846197	9848701	2505	chr1	9907425	9912111	4687	62319	-0.467455	6.78057	0.713151	0.3984
chr1	9846197	9848701	2505	chr1	9922379	9926527	4149	77004	-0.0381247	6.44936	0.00426133	0.947952
chr1	9846197	9848701	2505	chr1	9932609	9934375	1767	86043	1.47547	4.47342	1.61406	0.203922
chr1	9846197	9848701	2505	chr1	9940361	9942428	2068	93945	0.628739	4.68461	0.367677	0.544273
chr1	9846197	9848701	2505	chr1	9969343	9971870	2528	123157	-2.09517	3.84518	0.973285	0.323862
chr1	9846197	9848701	2505	chr1	10002037	10004636	2600	155887	1.38067	4.13048	0.870548	0.350804
chr1	9846197	9848701	2505	chr1	10009103	10012132	3030	163168	-4.11784	4.37078	4.6528	0.031003
chr1	9846197	9848701	2505	chr1	10019516	10021792	2277	173205	-0.307176	4.13137	0.0400325	0.841417
chr1	9846197	9848701	2505	chr1	10092546	10095119	2574	246383	0.0406104	4.36906	0.00114537	0.973002
chr1	9846197	9848701	2505	chr1	10531332	10536785	5454	686609	2.60836	3.84426	1.8518	0.173574
chr1	9846197	9848701	2505	chr1	11071531	11074085	2555	1225359	2.60836	3.84426	1.8518	0.173574
chr1	9846197	9848701	2505	chr1	11098488	11100303	1816	1251946	2.60836	3.84426	1.8518	0.173574
chr1	9846197	9848701	2505	chr1	11321479	11323492	2014	1475036	2.66682	3.86614	1.9005	0.168022
chr1	9881709	9884826	3118	chr1	9895552	9897379	1828	13198	-2.91553	3.99592	1.92409	0.165407
chr1	9881709	9884826	3118	chr1	9907425	9912111	4687	26500	-0.0278979	6.28178	0.00218399	0.962726
chr1	9881709	9884826	3118	chr1	9922379	9926527	4149	41185	-1.26839	5.20027	1.90515	0.167503
chr1	9881709	9884826	3118	chr1	9932609	9934375	1767	50224	-2.91537	3.99583	1.92392	0.165425
chr1	9881709	9884826	3118	chr1	9940361	9942428	2068	58127	-2.09501	3.84509	0.973196	0.323884
chr1	9881709	9884826	3118	chr1	10009103	10012132	3030	127350	-2.91553	3.99592	1.92409	0.165407
chr1	9881709	9884826	3118	chr1	10092546	10095119	2574	210565	-2.09501	3.84509	0.973196	0.323884
chr1	9881709	9884826	3118	chr1	10249115	10250717	1603	366648	2.60836	3.84426	1.8518	0.173574
chr1	9881709	9884826	3118	chr1	10457928	10460418	2491	575905	-2.09517	3.84518	0.973285	0.323862
chr1	9895552	9897379	1828	chr1	9907425	9912111	4687	13302	0.344786	6.4672	0.362724	0.546997
chr1	9895552	9897379	1828	chr1	9922379	9926527	4149	27987	0.273173	4.75012	0.0763404	0.782319
chr1	9895552	9897379	1828	chr1	9932609	9934375	1767	37026	-0.307176	4.13137	0.0400325	0.841417
chr1	9895552	9897379	1828	chr1	10489450	10491688	2239	594103	-2.09501	3.84509	0.973196	0.323884
chr1	9895552	9897379	1828	chr1	11321479	11323492	2014	1426020	-2.09517	3.84518	0.973285	0.323862
chr1	9907425	9912111	4687	chr1	9922379	9926527	4149	14685	-0.354652	7.68383	0.584778	0.444446
chr1	9907425	9912111	4687	chr1	9932609	9934375	1767	23724	0.0972281	4.39053	0.00561909	0.940246
chr1	9907425	9912111	4687	chr1	9940361	9942428	2068	31626	-2.91553	3.99592	1.92409	0.165407
chr1	9907425	9912111	4687	chr1	10002037	10004636	2600	93568	0.956093	4.57162	0.778173	0.3777
chr1	9907425	9912111	4687	chr1	10009103	10012132	3030	100849	-0.110368	4.66455	0.0105547	0.918172
chr1	9907425	9912111	4687	chr1	10019516	10021792	2277	110886	-2.09501	3.84509	0.973196	0.323884
chr1	9907425	9912111	4687	chr1	10092546	10095119	2574	184064	2.60836	3.84426	1.8518	0.173574
chr1	9907425	9912111	4687	chr1	10489450	10491688	2239	580801	-2.09501	3.84509	0.973196	0.323884
chr1	9907425	9912111	4687	chr1	10531332	10536785	5454	624290	-2.91553	3.99592	1.92409	0.165407
chr1	9907425	9912111	4687	chr1	10726596	10728285	1690	817672	-2.09517	3.84518	0.973285	0.323862
chr1	9907425	9912111	4687	chr1	11071531	11074085	2555	1163040	-2.09501	3.84509	0.973196	0.323884
chr1	9907425	9912111	4687	chr1	11158677	11160770	2094	1249955	-2.09501	3.84509	0.973196	0.323884
chr1	9907425	9912111	4687	chr1	11286000	11289944	3945	1378204	0.513182	3.9951	0.0944795	0.758558
chr1	9907425	9912111	4687	chr1	11708882	11712713	3832	1801029	-2.09501	3.84509	0.973196	0.323884
chr1	9907425	9912111	4687	chr1	11796467	11798522	2056	1887726	-2.09501	3.84509	0.973196	0.323884
chr1	9907425	9912111	4687	chr1	11873747	11877050	3304	1965630	-2.09501	3.84509	0.973196	0.323884
chr1	9922379	9926527	4149	chr1	9932609	9934375	1767	9039	0.408292	5.06939	0.222179	0.637385
chr1	9922379	9926527	4149	chr1	9940361	9942428	2068	16941	1.1476	4.38966	0.861537	0.353309
chr1	9922379	9926527	4149	chr1	9969343	9971870	2528	46153	-2.91569	3.99601	1.92426	0.165388
chr1	9922379	9926527	4149	chr1	10002037	10004636	2600	78883	2.07223	4.68305	3.73085	0.0534163
chr1	9922379	9926527	4149	chr1	10009103	10012132	3030	86164	0.572657	4.83072	0.365473	0.545482
chr1	9922379	9926527	4149	chr1	10019516	10021792	2277	96201	1.38051	4.13056	0.870365	0.350854
chr1	9922379	9926527	4149	chr1	10092546	10095119	2574	169379	-3.81646	4.25645	3.76266	0.0524092
chr1	9922379	9926527	4149	chr1	10457928	10460418	2491	534720	1.38067	4.13048	0.870548	0.350804
chr1	9922379	9926527	4149	chr1	10489450	10491688	2239	566116	2.60836	3.84426	1.8518	0.173574
chr1	9922379	9926527	4149	chr1	10999383	11001403	2021	1075940	-2.09517	3.84518	0.973285	0.323862
chr1	9922379	9926527	4149	chr1	11158677	11160770	2094	1235270	2.60836	3.84426	1.8518	0.173574
chr1	9922379	9926527	4149	chr1	11321479	11323492	2014	1398032	-2.09517	3.84518	0.973285	0.323862
chr1	9932609	9934375	1767	chr1	9940361	9942428	2068	7902	0.51335	3.99501	0.0945291	0.758496
chr1	9932609	9934375	1767	chr1	10002037	10004636	2600	69844	-2.91569	3.99601	1.92426	0.165388
chr1	9932609	9934375	1767	chr1	10092546	10095119	2574	160340	0.513182	3.9951	0.0944795	0.758558
chr1	9940361	9942428	2068	chr1	10002037	10004636	2600	61942	-2.09517	3.84518	0.973285	0.323862
chr1	9940361	9942428	2068	chr1	10092546	10095119	2574	152438	-2.09517	3.84518	0.973285	0.323862
chr1	9969343	9971870	2528	chr1	10009103	10012132	3030	40011	2.60836	3.84426	1.8518	0.173574
chr1	9969343	9971870	2528	chr1	10531332	10536785	5454	563452	-2.09517	3.84518	0.973285	0.323862
chr1	10002037	10004636	2600	chr1	10009103	10012132	3030	7281	0.265392	5.25797	0.108663	0.741672
chr1	10002037	10004636	2600	chr1	10019516	10021792	2277	17317	-4.11814	4.37094	4.65354	0.0309895
chr1	10002037	10004636	2600	chr1	10092546	10095119	2574	90496	-4.76449	4.66683	7.21581	0.00722642
chr1	10002037	10004636	2600	chr1	10457928	10460418	2491	455836	-2.09501	3.84509	0.973196	0.323884
chr1	10002037	10004636	2600	chr1	10489450	10491688	2239	487232	2.60836	3.84426	1.8518	0.173574
chr1	10002037	10004636	2600	chr1	11843977	11845749	1773	1841526	-2.09517	3.84518	0.973285	0.323862
chr1	10009103	10012132	3030	chr1	10019516	10021792	2277	10036	-0.572136	4.83238	0.325859	0.568108
chr1	10009103	10012132	3030	chr1	10092546	10095119	2574	83215	0.191163	4.57245	0.0309051	0.860452
chr1	10009103	10012132	3030	chr1	10457928	10460418	2491	448555	-2.09501	3.84509	0.973196	0.323884
chr1	10009103	10012132	3030	chr1	10531332	10536785	5454	523441	-2.91553	3.99592	1.92409	0.165407
chr1	10009103	10012132	3030	chr1	11071531	11074085	2555	1062190	-2.09501	3.84509	0.973196	0.323884
chr1	10019516	10021792	2277	chr1	10092546	10095119	2574	73178	-2.09517	3.84518	0.973285	0.323862
chr1	10019516	10021792	2277	chr1	10457928	10460418	2491	438519	-2.91553	3.99592	1.92409	0.165407
chr1	10019516	10021792	2277	chr1	10531332	10536785	5454	513404	-2.09517	3.84518	0.973285	0.323862
chr1	10019516	10021792	2277	chr1	11739774	11742949	3176	1720707	-2.09501	3.84509	0.973196	0.323884
chr1	10092546	10095119	2574	chr1	10457928	10460418	2491	365340	-2.09501	3.84509	0.973196	0.323884
chr1	10092546	10095119	2574	chr1	10489450	10491688	2239	396736	-2.09517	3.84518	0.973285	0.323862
chr1	10249115	10250717	1603	chr1	10531332	10536785	5454	284142	2.60836	3.84426	1.8518	0.173574
chr1	10371508	10373186	1679	chr1	10531332	10536785	5454	161711	-2.09517	3.84518	0.973285	0.323862
chr1	10457928	10460418	2491	chr1	10489450	10491688	2239	31396	-2.91553	3.99592	1.92409	0.165407
chr1	10457928	10460418	2491	chr1	10531332	10536785	5454	74885	-0.340932	4.47494	0.08065	0.776419
chr1	10457928	10460418	2491	chr1	10752673	10753939	1267	294133	-2.09501	3.84509	0.973196	0.323884
chr1	10457928	10460418	2491	chr1	10999383	11001403	2021	541220	-2.09501	3.84509	0.973196	0.323884
chr1	10457928	10460418	2491	chr1	11071531	11074085	2555	613635	-2.09517	3.84518	0.973285	0.323862
chr1	10457928	10460418	2491	chr1	11321479	11323492	2014	863312	-2.09517	3.84518	0.973285	0.323862
chr1	10457928	10460418	2491	chr1	11778623	11781024	2402	1320650	2.66682	3.86614	1.9005	0.168022
chr1	10457928	10460418	2491	chr1	12039811	12041997	2187	1581731	2.60836	3.84426	1.8518	0.173574
chr1	10457928	10460418	2491	chr1	12404142	12406790	2649	1946293	-2.09517	3.84518	0.973285	0.323862
chr1	10489450	10491688	2239	chr1	10531332	10536785	5454	43489	-1.2081	4.36992	0.773664	0.379086
chr1	10489450	10491688	2239	chr1	11959085	11962160	3076	1470053	-2.09517	3.84518	0.973285	0.323862
chr1	10489450	10491688	2239	chr1	11993698	11995318	1621	1503939	-2.09501	3.84509	0.973196	0.323884
chr1	10531332	10536785	5454	chr1	11063109	11064335	1227	529663	-2.09517	3.84518	0.973285	0.323862
chr1	10531332	10536785	5454	chr1	11098488	11100303	1816	565337	-2.09501	3.84509	0.973196	0.323884
chr1	10531332	10536785	5454	chr1	11321479	11323492	2014	788427	2.60836	3.84426	1.8518	0.173574
chr1	10531332	10536785	5454	chr1	11739774	11742949	3176	1207303	-2.09501	3.84509	0.973196	0.323884
chr1	10531332	10536785	5454	chr1	11959085	11962160	3076	1426564	-2.09501	3.84509	0.973196	0.323884
chr1	10531332	10536785	5454	chr1	11993698	11995318	1621	1460449	-2.09501	3.84509	0.973196	0.323884
chr1	10752673	10753939	1267	chr1	10999383	11001403	2021	247087	-2.91553	3.99592	1.92409	0.165407
chr1	10752673	10753939	1267	chr1	11063109	11064335	1227	310416	2.60836	3.84426	1.8518	0.173574
chr1	10752673	10753939	1267	chr1	11286000	11289944	3945	534666	-2.91553	3.99592	1.92409	0.165407
chr1	10752673	10753939	1267	chr1	11622220	11625083	2864	870345	-2.09517	3.84518	0.973285	0.323862
chr1	10752673	10753939	1267	chr1	11796467	11798522	2056	1044188	-2.09501	3.84509	0.973196	0.323884
chr1	10999383	11001403	2021	chr1	11158677	11160770	2094	159330	2.60836	3.84426	1.8518	0.173574
chr1	10999383	11001403	2021	chr1	11778623	11781024	2402	779430	2.60836	3.84426	1.8518	0.173574
chr1	11063109	11064335	1227	chr1	11071531	11074085	2555	9086	0.513182	3.9951	0.0944795	0.758558
chr1	11063109	11064335	1227	chr1	11286000	11289944	3945	224250	0.51335	3.99501	0.0945291	0.758496
chr1	11063109	11064335	1227	chr1	11561682	11563135	1454	498686	-2.09517	3.84518	0.973285	0.323862
chr1	11063109	11064335	1227	chr1	12097343	12102601	5259	1036250	2.60836	3.84426	1.8518	0.173574
chr1	11071531	11074085	2555	chr1	11105669	11107321	1653	33687	-2.09501	3.84509	0.973196	0.323884
chr1	11071531	11074085	2555	chr1	11118393	11121293	2901	47035	-2.09501	3.84509	0.973196	0.323884
chr1	11071531	11074085	2555	chr1	11158677	11160770	2094	86915	-2.09517	3.84518	0.973285	0.323862
chr1	11071531	11074085	2555	chr1	11286000	11289944	3945	215164	-2.91553	3.99592	1.92409	0.165407
chr1	11071531	11074085	2555	chr1	11332475	11335207	2733	261033	2.60836	3.84426	1.8518	0.173574
chr1	11071531	11074085	2555	chr1	11354057	11356388	2332	282414	2.60836	3.84426	1.8518	0.173574
chr1	11071531	11074085	2555	chr1	11368386	11369764	1379	296267	-2.09501	3.84509	0.973196	0.323884
chr1	11071531	11074085	2555	chr1	11465995	11469273	3279	394826	-2.91553	3.99592	1.92409	0.165407
chr1	11071531	11074085	2555	chr1	11521238	11524058	2821	449840	-2.09501	3.84509	0.973196	0.323884
chr1	11071531	11074085	2555	chr1	11622220	11625083	2864	550843	-2.09501	3.84509	0.973196	0.323884
chr1	11071531	11074085	2555	chr1	11708882	11712713	3832	637989	-2.09517	3.84518	0.973285	0.323862
chr1	11071531	11074085	2555	chr1	11864280	11868388	4109	793526	2.60836	3.84426	1.8518	0.173574
chr1	11071531	11074085	2555	chr1	11967064	11970949	3886	896198	2.60836	3.84426	1.8518	0.173574
chr1	11071531	11074085	2555	chr1	11989110	11991342	2233	917418	2.66682	3.86614	1.9005	0.168022
chr1	11071531	11074085	2555	chr1	12097343	12102601	5259	1027164	-2.09517	3.84518	0.973285	0.323862
chr1	11071531	11074085	2555	chr1	12209148	12214283	5136	1138907	-2.91553	3.99592	1.92409	0.165407
chr1	11098488	11100303	1816	chr1	11118393	11121293	2901	20447	-2.09501	3.84509	0.973196	0.323884
chr1	11098488	11100303	1816	chr1	11260864	11262100	1237	162086	-2.09501	3.84509	0.973196	0.323884
chr1	11098488	11100303	1816	chr1	11286000	11289944	3945	188576	-3.43507	4.13208	2.85329	0.0911873
chr1	11098488	11100303	1816	chr1	11521238	11524058	2821	423252	-2.09517	3.84518	0.973285	0.323862
chr1	11098488	11100303	1816	chr1	11538069	11540535	2467	439906	-2.09501	3.84509	0.973196	0.323884
chr1	11098488	11100303	1816	chr1	11873747	11877050	3304	776003	-2.09517	3.84518	0.973285	0.323862
chr1	11098488	11100303	1816	chr1	11959085	11962160	3076	861227	-2.09517	3.84518	0.973285	0.323862
chr1	11105669	11107321	1653	chr1	11118393	11121293	2901	13348	-0.827188	4.25583	0.330517	0.565355
chr1	11105669	11107321	1653	chr1	11158677	11160770	2094	53228	3.47568	3.9942	3.63313	0.0566402
chr1	11105669	11107321	1653	chr1	11286000	11289944	3945	181477	2.60836	3.84426	1.8518	0.173574
chr1	11105669	11107321	1653	chr1	11465995	11469273	3279	361139	-2.91569	3.99601	1.92426	0.165388
chr1	11105669	11107321	1653	chr1	11622220	11625083	2864	517156	2.66682	3.86614	1.9005	0.168022
chr1	11105669	11107321	1653	chr1	11967064	11970949	3886	862511	0.513182	3.9951	0.0944795	0.758558
chr1	11118393	11121293	2901	chr1	11286000	11289944	3945	168129	-2.09517	3.84518	0.973285	0.323862
chr1	11118393	11121293	2901	chr1	11321479	11323492	2014	202642	-2.91553	3.99592	1.92409	0.165407
chr1	11118393	11121293	2901	chr1	11332475	11335207	2733	213998	1.43761	4.15206	0.932795	0.334138
chr1	11118393	11121293	2901	chr1	11864280	11868388	4109	746491	-2.09501	3.84509	0.973196	0.323884
chr1	11118393	11121293	2901	chr1	11959085	11962160	3076	840779	2.60836	3.84426	1.8518	0.173574
chr1	11118393	11121293	2901	chr1	12097343	12102601	5259	980129	-2.09517	3.84518	0.973285	0.323862
chr1	11158677	11160770	2094	chr1	11260864	11262100	1237	101758	2.60836	3.84426	1.8518	0.173574
chr1	11158677	11160770	2094	chr1	11286000	11289944	3945	128248	-0.307176	4.13137	0.0400325	0.841417
chr1	11158677	11160770	2094	chr1	11332475	11335207	2733	174117	-2.09501	3.84509	0.973196	0.323884
chr1	11158677	11160770	2094	chr1	11368386	11369764	1379	209351	-2.09501	3.84509	0.973196	0.323884
chr1	11158677	11160770	2094	chr1	11465995	11469273	3279	307910	-2.09501	3.84509	0.973196	0.323884
chr1	11158677	11160770	2094	chr1	11561682	11563135	1454	402685	-2.09517	3.84518	0.973285	0.323862
chr1	11158677	11160770	2094	chr1	11708882	11712713	3832	551074	2.60836	3.84426	1.8518	0.173574
chr1	11158677	11160770	2094	chr1	11778623	11781024	2402	620100	2.60836	3.84426	1.8518	0.173574
chr1	11158677	11160770	2094	chr1	11873747	11877050	3304	715675	-2.09501	3.84509	0.973196	0.323884
chr1	11158677	11160770	2094	chr1	12220724	12223575	2852	1062426	2.60836	3.84426	1.8518	0.173574
chr1	11158677	11160770	2094	chr1	12445464	12447332	1869	1286674	-2.09517	3.84518	0.973285	0.323862
chr1	11260864	11262100	1237	chr1	11286000	11289944	3945	26490	-0.307176	4.13137	0.0400325	0.841417
chr1	11260864	11262100	1237	chr1	12111553	12114445	2893	851517	-2.09517	3.84518	0.973285	0.323862
chr1	11286000	11289944	3945	chr1	11299737	11301430	1694	12611	-0.188312	4.90837	0.0393587	0.84274
chr1	11286000	11289944	3945	chr1	11321479	11323492	2014	34513	-0.307176	4.13137	0.0400325	0.841417
chr1	11286000	11289944	3945	chr1	11332475	11335207	2733	45869	0.0972281	4.39053	0.00561909	0.940246
chr1	11286000	11289944	3945	chr1	11347496	11349253	1758	60402	-2.09517	3.84518	0.973285	0.323862
chr1	11286000	11289944	3945	chr1	11354057	11356388	2332	67250	1.09209	4.36837	0.787884	0.374741
chr1	11286000	11289944	3945	chr1	11465995	11469273	3279	179662	-3.81661	4.25654	3.76297	0.0523995
chr1	11286000	11289944	3945	chr1	11561682	11563135	1454	274436	-2.09501	3.84509	0.973196	0.323884
chr1	11286000	11289944	3945	chr1	11622220	11625083	2864	335679	-0.307176	4.13137	0.0400325	0.841417
chr1	11286000	11289944	3945	chr1	11708882	11712713	3832	422825	0.51335	3.99501	0.0945291	0.758496
chr1	11286000	11289944	3945	chr1	11739774	11742949	3176	453389	0.513182	3.9951	0.0944795	0.758558
chr1	11286000	11289944	3945	chr1	11778623	11781024	2402	491851	-2.09517	3.84518	0.973285	0.323862
chr1	11286000	11289944	3945	chr1	11796467	11798522	2056	509522	-2.09517	3.84518	0.973285	0.323862
chr1	11286000	11289944	3945	chr1	11843977	11845749	1773	556891	-2.09501	3.84509	0.973196	0.323884
chr1	11286000	11289944	3945	chr1	11864280	11868388	4109	578362	-2.91537	3.99583	1.92392	0.165425
chr1	11286000	11289944	3945	chr1	11959085	11962160	3076	672650	-3.43554	4.13234	2.85402	0.0911457
chr1	11286000	11289944	3945	chr1	11967064	11970949	3886	681034	-2.91553	3.99592	1.92409	0.165407
chr1	11286000	11289944	3945	chr1	11973312	11976532	3221	686950	-2.91553	3.99592	1.92409	0.165407
chr1	11286000	11289944	3945	chr1	12078923	12080627	1705	791803	-2.09517	3.84518	0.973285	0.323862
chr1	11286000	11289944	3945	chr1	12209148	12214283	5136	923743	-2.09501	3.84509	0.973196	0.323884
chr1	11299737	11301430	1694	chr1	11321479	11323492	2014	21902	-2.09517	3.84518	0.973285	0.323862
chr1	11299737	11301430	1694	chr1	11347496	11349253	1758	47791	-2.09517	3.84518	0.973285	0.323862
chr1	11299737	11301430	1694	chr1	11354057	11356388	2332	54639	-2.09501	3.84509	0.973196	0.323884
chr1	11299737	11301430	1694	chr1	11465995	11469273	3279	167050	-2.09517	3.84518	0.973285	0.323862
chr1	11299737	11301430	1694	chr1	11739774	11742949	3176	440778	2.60836	3.84426	1.8518	0.173574
chr1	11321479	11323492	2014	chr1	11332475	11335207	2733	11355	-0.307339	4.13145	0.0400697	0.841344
chr1	11321479	11323492	2014	chr1	11347496	11349253	1758	25889	-2.09501	3.84509	0.973196	0.323884
chr1	11321479	11323492	2014	chr1	11465995	11469273	3279	145148	0.51335	3.99501	0.0945291	0.758496
chr1	11321479	11323492	2014	chr1	11521238	11524058	2821	200162	-2.09517	3.84518	0.973285	0.323862
chr1	11321479	11323492	2014	chr1	11873747	11877050	3304	552913	0.51335	3.99501	0.0945291	0.758496
chr1	11321479	11323492	2014	chr1	11967064	11970949	3886	646521	-2.09517	3.84518	0.973285	0.323862
chr1	11321479	11323492	2014	chr1	11973312	11976532	3221	652436	-2.09517	3.84518	0.973285	0.323862
chr1	11321479	11323492	2014	chr1	11993698	11995318	1621	672022	-2.09501	3.84509	0.973196	0.323884
chr1	11321479	11323492	2014	chr1	12097343	12102601	5259	777486	-2.09517	3.84518	0.973285	0.323862
chr1	11332475	11335207	2733	chr1	11347496	11349253	1758	14533	-3.81661	4.25654	3.76297	0.0523995
chr1	11332475	11335207	2733	chr1	11368386	11369764	1379	35234	-2.09517	3.84518	0.973285	0.323862
chr1	11332475	11335207	2733	chr1	11521238	11524058	2821	188807	-2.09501	3.84509	0.973196	0.323884
chr1	11332475	11335207	2733	chr1	11622220	11625083	2864	289810	-2.09501	3.84509	0.973196	0.323884
chr1	11332475	11335207	2733	chr1	11708882	11712713	3832	376956	-2.09501	3.84509	0.973196	0.323884
chr1	11332475	11335207	2733	chr1	11739774	11742949	3176	407520	0.560148	4.25488	0.176678	0.674244
chr1	11332475	11335207	2733	chr1	11778623	11781024	2402	445982	0.513182	3.9951	0.0944795	0.758558
chr1	11332475	11335207	2733	chr1	11796467	11798522	2056	463653	-2.09501	3.84509	0.973196	0.323884
chr1	11332475	11335207	2733	chr1	11993698	11995318	1621	660667	2.66682	3.86614	1.9005	0.168022
chr1	11332475	11335207	2733	chr1	12598768	12600833	2066	1265959	-2.09501	3.84509	0.973196	0.323884
chr1	11347496	11349253	1758	chr1	11465995	11469273	3279	119259	-2.09501	3.84509	0.973196	0.323884
chr1	11354057	11356388	2332	chr1	11465995	11469273	3279	112411	-2.09517	3.84518	0.973285	0.323862
chr1	11354057	11356388	2332	chr1	11959085	11962160	3076	605400	-2.09517	3.84518	0.973285	0.323862
chr1	11368386	11369764	1379	chr1	11739774	11742949	3176	372286	2.66682	3.86614	1.9005	0.168022
chr1	11368386	11369764	1379	chr1	11778623	11781024	2402	410748	-2.09517	3.84518	0.973285	0.323862
chr1	11368386	11369764	1379	chr1	11993698	11995318	1621	625433	-2.09517	3.84518	0.973285	0.323862
chr1	11465995	11469273	3279	chr1	11521238	11524058	2821	55014	-2.09517	3.84518	0.973285	0.323862
chr1	11465995	11469273	3279	chr1	11538069	11540535	2467	71668	0.513182	3.9951	0.0944795	0.758558
chr1	11465995	11469273	3279	chr1	11561682	11563135	1454	94774	-2.09517	3.84518	0.973285	0.323862
chr1	11465995	11469273	3279	chr1	11739774	11742949	3176	273727	-2.09501	3.84509	0.973196	0.323884
chr1	11465995	11469273	3279	chr1	11778623	11781024	2402	312189	-2.91537	3.99583	1.92392	0.165425
chr1	11465995	11469273	3279	chr1	11973312	11976532	3221	507288	-2.09501	3.84509	0.973196	0.323884
chr1	11465995	11469273	3279	chr1	12039811	12041997	2187	573270	-2.09517	3.84518	0.973285	0.323862
chr1	11465995	11469273	3279	chr1	12078923	12080627	1705	612141	2.60836	3.84426	1.8518	0.173574
chr1	11465995	11469273	3279	chr1	12097343	12102601	5259	632338	2.60836	3.84426	1.8518	0.173574
chr1	11465995	11469273	3279	chr1	12209148	12214283	5136	744081	-2.09501	3.84509	0.973196	0.323884
chr1	11465995	11469273	3279	chr1	12220724	12223575	2852	754515	-2.09517	3.84518	0.973285	0.323862
chr1	11521238	11524058	2821	chr1	11538069	11540535	2467	16654	-2.09517	3.84518	0.973285	0.323862
chr1	11521238	11524058	2821	chr1	11561682	11563135	1454	39760	2.60836	3.84426	1.8518	0.173574
chr1	11521238	11524058	2821	chr1	11622220	11625083	2864	101003	-2.09501	3.84509	0.973196	0.323884
chr1	11521238	11524058	2821	chr1	11959085	11962160	3076	437974	2.60836	3.84426	1.8518	0.173574
chr1	11538069	11540535	2467	chr1	11561682	11563135	1454	23106	-2.09517	3.84518	0.973285	0.323862
chr1	11538069	11540535	2467	chr1	11622220	11625083	2864	84349	0.513182	3.9951	0.0944795	0.758558
chr1	11538069	11540535	2467	chr1	11708882	11712713	3832	171495	-2.09501	3.84509	0.973196	0.323884
chr1	11538069	11540535	2467	chr1	11778623	11781024	2402	240521	-2.09501	3.84509	0.973196	0.323884
chr1	11538069	11540535	2467	chr1	11796467	11798522	2056	258192	-2.91537	3.99583	1.92392	0.165425
chr1	11538069	11540535	2467	chr1	11864280	11868388	4109	327032	2.60836	3.84426	1.8518	0.173574
chr1	11538069	11540535	2467	chr1	12097343	12102601	5259	560670	-2.09501	3.84509	0.973196	0.323884
chr1	11538069	11540535	2467	chr1	12209148	12214283	5136	672413	-2.09517	3.84518	0.973285	0.323862
chr1	11561682	11563135	1454	chr1	11622220	11625083	2864	61243	-2.91537	3.99583	1.92392	0.165425
chr1	11561682	11563135	1454	chr1	12078923	12080627	1705	517366	-2.09501	3.84509	0.973196	0.323884
chr1	11622220	11625083	2864	chr1	11739774	11742949	3176	117710	2.60836	3.84426	1.8518	0.173574
chr1	11622220	11625083	2864	chr1	11984385	11986896	2512	361989	2.60836	3.84426	1.8518	0.173574
chr1	11622220	11625083	2864	chr1	12209148	12214283	5136	588064	-2.09517	3.84518	0.973285	0.323862
chr1	11708882	11712713	3832	chr1	11739774	11742949	3176	30564	-1.2081	4.36992	0.773664	0.379086
chr1	11708882	11712713	3832	chr1	11778623	11781024	2402	69026	-2.09501	3.84509	0.973196	0.323884
chr1	11708882	11712713	3832	chr1	11873747	11877050	3304	164601	0.51335	3.99501	0.0945291	0.758496
chr1	11708882	11712713	3832	chr1	11967064	11970949	3886	258209	-2.91537	3.99583	1.92392	0.165425
chr1	11708882	11712713	3832	chr1	12209148	12214283	5136	500918	-2.09517	3.84518	0.973285	0.323862
chr1	11739774	11742949	3176	chr1	11778623	11781024	2402	38462	0.0973861	4.39044	0.00563639	0.940154
chr1	11739774	11742949	3176	chr1	11796467	11798522	2056	56133	1.91262	4.254	1.94772	0.162832
chr1	11739774	11742949	3176	chr1	11864280	11868388	4109	124972	-2.09517	3.84518	0.973285	0.323862
chr1	11739774	11742949	3176	chr1	11873747	11877050	3304	134037	-0.82703	4.25575	0.330401	0.565423
chr1	11739774	11742949	3176	chr1	11900492	11902625	2134	160197	-2.09517	3.84518	0.973285	0.323862
chr1	11739774	11742949	3176	chr1	11959085	11962160	3076	219261	4.00762	4.12967	5.3496	0.020727
chr1	11739774	11742949	3176	chr1	11967064	11970949	3886	227645	-2.91569	3.99601	1.92426	0.165388
chr1	11739774	11742949	3176	chr1	11973312	11976532	3221	233560	0.513182	3.9951	0.0944795	0.758558
chr1	11739774	11742949	3176	chr1	11984385	11986896	2512	244279	-2.09501	3.84509	0.973196	0.323884
chr1	11739774	11742949	3176	chr1	12078923	12080627	1705	338413	0.513182	3.9951	0.0944795	0.758558
chr1	11739774	11742949	3176	chr1	12111553	12114445	2893	371637	-2.09517	3.84518	0.973285	0.323862
chr1	11739774	11742949	3176	chr1	12209148	12214283	5136	470354	0.513182	3.9951	0.0944795	0.758558
chr1	11778623	11781024	2402	chr1	11796467	11798522	2056	17671	1.38067	4.13048	0.870548	0.350804
chr1	11778623	11781024	2402	chr1	11864280	11868388	4109	86510	-2.09517	3.84518	0.973285	0.323862
chr1	11778623	11781024	2402	chr1	11959085	11962160	3076	180799	-2.09517	3.84518	0.973285	0.323862
chr1	11778623	11781024	2402	chr1	11967064	11970949	3886	189183	2.60836	3.84426	1.8518	0.173574
chr1	11778623	11781024	2402	chr1	11973312	11976532	3221	195098	-2.91553	3.99592	1.92409	0.165407
chr1	11778623	11781024	2402	chr1	11984385	11986896	2512	205817	-2.09517	3.84518	0.973285	0.323862
chr1	11778623	11781024	2402	chr1	11989110	11991342	2233	210402	-2.09517	3.84518	0.973285	0.323862
chr1	11778623	11781024	2402	chr1	12186026	12188424	2399	407401	2.60836	3.84426	1.8518	0.173574
chr1	11778623	11781024	2402	chr1	12209148	12214283	5136	431892	-2.09517	3.84518	0.973285	0.323862
chr1	11796467	11798522	2056	chr1	11864280	11868388	4109	68839	-0.307013	4.13128	0.0399955	0.841489
chr1	11796467	11798522	2056	chr1	11873747	11877050	3304	77904	0.513182	3.9951	0.0944795	0.758558
chr1	11796467	11798522	2056	chr1	11959085	11962160	3076	163128	-2.09501	3.84509	0.973196	0.323884
chr1	11796467	11798522	2056	chr1	11967064	11970949	3886	171512	0.513182	3.9951	0.0944795	0.758558
chr1	11796467	11798522	2056	chr1	11973312	11976532	3221	177427	1.43744	4.15215	0.932606	0.334187
chr1	11796467	11798522	2056	chr1	11984385	11986896	2512	188146	-2.09501	3.84509	0.973196	0.323884
chr1	11796467	11798522	2056	chr1	12097343	12102601	5259	302477	-2.09501	3.84509	0.973196	0.323884
chr1	11796467	11798522	2056	chr1	12209148	12214283	5136	414221	-2.09517	3.84518	0.973285	0.323862
chr1	11843977	11845749	1773	chr1	11864280	11868388	4109	21471	-2.09517	3.84518	0.973285	0.323862
chr1	11843977	11845749	1773	chr1	11873747	11877050	3304	30535	0.513182	3.9951	0.0944795	0.758558
chr1	11843977	11845749	1773	chr1	11959085	11962160	3076	115759	-2.09501	3.84509	0.973196	0.323884
chr1	11843977	11845749	1773	chr1	12078923	12080627	1705	234912	2.60836	3.84426	1.8518	0.173574
chr1	11843977	11845749	1773	chr1	12097343	12102601	5259	255109	-2.91537	3.99583	1.92392	0.165425
chr1	11864280	11868388	4109	chr1	11873747	11877050	3304	9064	-0.325786	5.97509	0.247661	0.618727
chr1	11864280	11868388	4109	chr1	11900492	11902625	2134	35224	-0.826872	4.25566	0.330286	0.565491
chr1	11864280	11868388	4109	chr1	11959085	11962160	3076	94288	-0.891209	4.6652	0.634903	0.425563
chr1	11864280	11868388	4109	chr1	11967064	11970949	3886	102672	-4.11784	4.37078	4.6528	0.031003
chr1	11864280	11868388	4109	chr1	11973312	11976532	3221	108588	1.38051	4.13056	0.870365	0.350854
chr1	11864280	11868388	4109	chr1	11984385	11986896	2512	119306	2.60836	3.84426	1.8518	0.173574
chr1	11864280	11868388	4109	chr1	11989110	11991342	2233	123892	-2.91569	3.99601	1.92426	0.165388
chr1	11864280	11868388	4109	chr1	11993698	11995318	1621	128174	-2.91553	3.99592	1.92409	0.165407
chr1	11864280	11868388	4109	chr1	12039811	12041997	2187	174570	-2.09517	3.84518	0.973285	0.323862
chr1	11864280	11868388	4109	chr1	12078923	12080627	1705	213441	-2.91537	3.99583	1.92392	0.165425
chr1	11864280	11868388	4109	chr1	12111553	12114445	2893	246665	-2.09501	3.84509	0.973196	0.323884
chr1	11864280	11868388	4109	chr1	12202835	12204613	1779	337390	-2.91553	3.99592	1.92409	0.165407
chr1	11864280	11868388	4109	chr1	12209148	12214283	5136	345381	-0.307013	4.13128	0.0399955	0.841489
chr1	11864280	11868388	4109	chr1	12252208	12254278	2071	386909	-2.09501	3.84509	0.973196	0.323884
chr1	11864280	11868388	4109	chr1	12289647	12291821	2175	424400	-2.09501	3.84509	0.973196	0.323884
chr1	11864280	11868388	4109	chr1	12404142	12406790	2649	539132	-2.09501	3.84509	0.973196	0.323884
chr1	11873747	11877050	3304	chr1	11900492	11902625	2134	26160	-1.50963	4.47578	1.30005	0.254204
chr1	11873747	11877050	3304	chr1	11959085	11962160	3076	85224	1.25542	4.66292	1.46825	0.225623
chr1	11873747	11877050	3304	chr1	11967064	11970949	3886	93608	-0.891499	4.66536	0.635306	0.425416
chr1	11873747	11877050	3304	chr1	11973312	11976532	3221	99523	0.272875	4.75028	0.0761826	0.782539
chr1	11873747	11877050	3304	chr1	11984385	11986896	2512	110242	2.60836	3.84426	1.8518	0.173574
chr1	11873747	11877050	3304	chr1	11989110	11991342	2233	114827	-2.91537	3.99583	1.92392	0.165425
chr1	11873747	11877050	3304	chr1	11993698	11995318	1621	119109	-0.82703	4.25575	0.330401	0.565423
chr1	11873747	11877050	3304	chr1	12078923	12080627	1705	204376	-2.09501	3.84509	0.973196	0.323884
chr1	11873747	11877050	3304	chr1	12097343	12102601	5259	224573	1.09225	4.36828	0.788099	0.374675
chr1	11873747	11877050	3304	chr1	12202835	12204613	1779	328325	-2.09501	3.84509	0.973196	0.323884
chr1	11873747	11877050	3304	chr1	12209148	12214283	5136	336317	-0.307339	4.13145	0.0400697	0.841344
chr1	11900492	11902625	2134	chr1	11959085	11962160	3076	59064	-0.64231	4.57336	0.309873	0.577758
chr1	11900492	11902625	2134	chr1	11967064	11970949	3886	67448	-0.340932	4.47494	0.08065	0.776419
chr1	11900492	11902625	2134	chr1	11973312	11976532	3221	73363	0.0402943	4.36923	0.00112977	0.973186
chr1	11900492	11902625	2134	chr1	11993698	11995318	1621	92949	-0.307339	4.13145	0.0400697	0.841344
chr1	11900492	11902625	2134	chr1	12078923	12080627	1705	178216	2.60836	3.84426	1.8518	0.173574
chr1	11900492	11902625	2134	chr1	12097343	12102601	5259	198413	-2.09517	3.84518	0.973285	0.323862
chr1	11900492	11902625	2134	chr1	12111553	12114445	2893	211440	-2.09517	3.84518	0.973285	0.323862
chr1	11900492	11902625	2134	chr1	12209148	12214283	5136	310157	2.60836	3.84426	1.8518	0.173574
chr1	11900492	11902625	2134	chr1	12236226	12237801	1576	335455	-2.09517	3.84518	0.973285	0.323862
chr1	11959085	11962160	3076	chr1	11967064	11970949	3886	8384	-0.499484	5.80964	0.527518	0.467652
chr1	11959085	11962160	3076	chr1	11973312	11976532	3221	14299	0.215246	5.23781	0.0726616	0.7875
chr1	11959085	11962160	3076	chr1	11984385	11986896	2512	25018	2.60836	3.84426	1.8518	0.173574
chr1	11959085	11962160	3076	chr1	11989110	11991342	2233	29603	-1.97112	4.6661	2.47947	0.115341
chr1	11959085	11962160	3076	chr1	11993698	11995318	1621	33885	-1.14964	4.39123	0.703739	0.40153
chr1	11959085	11962160	3076	chr1	12039811	12041997	2187	80281	-2.09517	3.84518	0.973285	0.323862
chr1	11959085	11962160	3076	chr1	12078923	12080627	1705	119152	0.273323	4.75004	0.0764194	0.78221
chr1	11959085	11962160	3076	chr1	12097343	12102601	5259	139349	2.35034	4.3888	3.27655	0.0702764
chr1	11959085	11962160	3076	chr1	12202835	12204613	1779	243101	2.60836	3.84426	1.8518	0.173574
chr1	11959085	11962160	3076	chr1	12209148	12214283	5136	251093	-0.307013	4.13128	0.0399955	0.841489
chr1	11959085	11962160	3076	chr1	12220724	12223575	2852	261527	-2.09501	3.84509	0.973196	0.323884
chr1	11959085	11962160	3076	chr1	12252208	12254278	2071	292620	-2.09517	3.84518	0.973285	0.323862
chr1	11959085	11962160	3076	chr1	12598768	12600833	2066	639178	2.60836	3.84426	1.8518	0.173574
chr1	11967064	11970949	3886	chr1	11973312	11976532	3221	5915	-0.0786482	6.25689	0.0169197	0.896506
chr1	11967064	11970949	3886	chr1	11984385	11986896	2512	16634	-0.642459	4.57344	0.310011	0.577674
chr1	11967064	11970949	3886	chr1	11989110	11991342	2233	21219	-0.078303	4.94968	0.0073744	0.931566
chr1	11967064	11970949	3886	chr1	11993698	11995318	1621	25501	1.36294	4.70492	1.71099	0.190858
chr1	11967064	11970949	3886	chr1	12039811	12041997	2187	71897	2.60836	3.84426	1.8518	0.173574
chr1	11967064	11970949	3886	chr1	12078923	12080627	1705	110768	2.66682	3.86614	1.9005	0.168022
chr1	11967064	11970949	3886	chr1	12097343	12102601	5259	130965	0.572394	4.4741	0.248366	0.618228
chr1	11967064	11970949	3886	chr1	12186026	12188424	2399	218218	2.60836	3.84426	1.8518	0.173574
chr1	11967064	11970949	3886	chr1	12202835	12204613	1779	234717	3.47568	3.9942	3.63313	0.0566402
chr1	11967064	11970949	3886	chr1	12209148	12214283	5136	242709	-2.91569	3.99601	1.92426	0.165388
chr1	11967064	11970949	3886	chr1	12268953	12270536	1584	300738	-2.09501	3.84509	0.973196	0.323884
chr1	11967064	11970949	3886	chr1	12289647	12291821	2175	321727	2.60836	3.84426	1.8518	0.173574
chr1	11973312	11976532	3221	chr1	11984385	11986896	2512	10718	-0.891209	4.6652	0.634903	0.425563
chr1	11973312	11976532	3221	chr1	11989110	11991342	2233	15304	-0.921082	4.98208	0.919017	0.337733
chr1	11973312	11976532	3221	chr1	11993698	11995318	1621	19586	-5.33152	4.98407	10.4095	0.00125371
chr1	11973312	11976532	3221	chr1	12039811	12041997	2187	65982	2.60836	3.84426	1.8518	0.173574
chr1	11973312	11976532	3221	chr1	12078923	12080627	1705	104853	0.273323	4.75004	0.0764194	0.78221
chr1	11973312	11976532	3221	chr1	12097343	12102601	5259	125050	2.29616	4.36751	3.13838	0.0764697
chr1	11973312	11976532	3221	chr1	12111553	12114445	2893	138077	2.60836	3.84426	1.8518	0.173574
chr1	11973312	11976532	3221	chr1	12186026	12188424	2399	212303	0.571643	4.01684	0.112349	0.737485
chr1	11973312	11976532	3221	chr1	12202835	12204613	1779	228802	-2.09501	3.84509	0.973196	0.323884
chr1	11973312	11976532	3221	chr1	12209148	12214283	5136	236793	1.38051	4.13056	0.870365	0.350854
chr1	11973312	11976532	3221	chr1	12220724	12223575	2852	247227	-2.09517	3.84518	0.973285	0.323862
chr1	11973312	11976532	3221	chr1	12268953	12270536	1584	294822	-2.09517	3.84518	0.973285	0.323862
chr1	11973312	11976532	3221	chr1	12445464	12447332	1869	471476	-2.09501	3.84509	0.973196	0.323884
chr1	11984385	11986896	2512	chr1	11993698	11995318	1621	8867	0.513182	3.9951	0.0944795	0.758558
chr1	11984385	11986896	2512	chr1	12039811	12041997	2187	55263	2.66682	3.86614	1.9005	0.168022
chr1	11984385	11986896	2512	chr1	12097343	12102601	5259	114331	-2.09501	3.84509	0.973196	0.323884
chr1	11984385	11986896	2512	chr1	12209148	12214283	5136	226075	0.513182	3.9951	0.0944795	0.758558
chr1	11989110	11991342	2233	chr1	12078923	12080627	1705	89549	-2.09517	3.84518	0.973285	0.323862
chr1	11989110	11991342	2233	chr1	12097343	12102601	5259	109746	0.560148	4.25488	0.176678	0.674244
chr1	11989110	11991342	2233	chr1	12202835	12204613	1779	213498	-2.09501	3.84509	0.973196	0.323884
chr1	11989110	11991342	2233	chr1	12209148	12214283	5136	221489	-2.91569	3.99601	1.92426	0.165388
chr1	11989110	11991342	2233	chr1	12268953	12270536	1584	279518	-2.09517	3.84518	0.973285	0.323862
chr1	11993698	11995318	1621	chr1	12078923	12080627	1705	85267	-0.307013	4.13128	0.0399955	0.841489
chr1	11993698	11995318	1621	chr1	12097343	12102601	5259	105464	0.51335	3.99501	0.0945291	0.758496
chr1	11993698	11995318	1621	chr1	12111553	12114445	2893	118491	-2.09501	3.84509	0.973196	0.323884
chr1	11993698	11995318	1621	chr1	12209148	12214283	5136	217207	-3.43539	4.13226	2.85378	0.0911595
chr1	12039811	12041997	2187	chr1	12078923	12080627	1705	38871	0.513182	3.9951	0.0944795	0.758558
chr1	12039811	12041997	2187	chr1	12097343	12102601	5259	59068	0.572394	4.4741	0.248366	0.618228
chr1	12039811	12041997	2187	chr1	12202835	12204613	1779	162820	-2.09501	3.84509	0.973196	0.323884
chr1	12039811	12041997	2187	chr1	12209148	12214283	5136	170811	2.60836	3.84426	1.8518	0.173574
chr1	12078923	12080627	1705	chr1	12097343	12102601	5259	20197	0.149578	5.50478	0.0426037	0.836473
chr1	12078923	12080627	1705	chr1	12111553	12114445	2893	33224	1.38067	4.13048	0.870548	0.350804
chr1	12078923	12080627	1705	chr1	12186026	12188424	2399	107450	-2.09501	3.84509	0.973196	0.323884
chr1	12078923	12080627	1705	chr1	12209148	12214283	5136	131940	0.246369	4.59364	0.0495427	0.823861
chr1	12078923	12080627	1705	chr1	12220724	12223575	2852	142374	-2.09517	3.84518	0.973285	0.323862
chr1	12078923	12080627	1705	chr1	14054076	14062507	8432	1978516	0.51335	3.99501	0.0945291	0.758496
chr1	12097343	12102601	5259	chr1	12111553	12114445	2893	13027	-1.28867	4.83286	1.46173	0.226655
chr1	12097343	12102601	5259	chr1	12202835	12204613	1779	103752	2.60836	3.84426	1.8518	0.173574
chr1	12097343	12102601	5259	chr1	12209148	12214283	5136	111743	-0.18817	4.9083	0.0393011	0.842853
chr1	12097343	12102601	5259	chr1	12220724	12223575	2852	122177	-2.09517	3.84518	0.973285	0.323862
chr1	12097343	12102601	5259	chr1	12268953	12270536	1584	169772	-2.09501	3.84509	0.973196	0.323884
chr1	12097343	12102601	5259	chr1	12289647	12291821	2175	190762	2.60836	3.84426	1.8518	0.173574
chr1	12097343	12102601	5259	chr1	12598768	12600833	2066	499828	2.60836	3.84426	1.8518	0.173574
chr1	12097343	12102601	5259	chr1	14026463	14031622	5160	1929070	0.51335	3.99501	0.0945291	0.758496
chr1	12097343	12102601	5259	chr1	14054076	14062507	8432	1958319	2.60836	3.84426	1.8518	0.173574
chr1	12111553	12114445	2893	chr1	12209148	12214283	5136	98716	0.51335	3.99501	0.0945291	0.758496
chr1	12186026	12188424	2399	chr1	12202835	12204613	1779	16499	0.513182	3.9951	0.0944795	0.758558
chr1	12186026	12188424	2399	chr1	12209148	12214283	5136	24490	-1.28867	4.83286	1.46173	0.226655
chr1	12186026	12188424	2399	chr1	12220724	12223575	2852	34924	-2.09517	3.84518	0.973285	0.323862
chr1	12186026	12188424	2399	chr1	12252208	12254278	2071	66018	-2.09517	3.84518	0.973285	0.323862
chr1	12186026	12188424	2399	chr1	12268953	12270536	1584	82519	-3.43539	4.13226	2.85378	0.0911595
chr1	12186026	12188424	2399	chr1	12289647	12291821	2175	103509	-2.09501	3.84509	0.973196	0.323884
chr1	12186026	12188424	2399	chr1	14026463	14031622	5160	1841817	-2.09501	3.84509	0.973196	0.323884
chr1	12202835	12204613	1779	chr1	12209148	12214283	5136	7991	-1.15851	6.06037	2.97291	0.0846692
chr1	12202835	12204613	1779	chr1	12220724	12223575	2852	18425	0.51335	3.99501	0.0945291	0.758496
chr1	12202835	12204613	1779	chr1	12268953	12270536	1584	66020	-3.81646	4.25645	3.76266	0.0524092
chr1	12202835	12204613	1779	chr1	14074332	14078350	4019	1872617	-2.09501	3.84509	0.973196	0.323884
chr1	12209148	12214283	5136	chr1	12220724	12223575	2852	10434	-0.188601	5.40504	0.0591019	0.807921
chr1	12209148	12214283	5136	chr1	12236226	12237801	1576	25298	-1.50948	4.4757	1.2998	0.254251
chr1	12209148	12214283	5136	chr1	12252208	12254278	2071	41527	-1.75897	4.57427	1.87528	0.170872
chr1	12209148	12214283	5136	chr1	12268953	12270536	1584	58029	-1.25564	5.40697	2.25921	0.132821
chr1	12209148	12214283	5136	chr1	12289647	12291821	2175	79018	-4.11784	4.37078	4.6528	0.031003
chr1	12209148	12214283	5136	chr1	12404142	12406790	2649	193750	2.60836	3.84426	1.8518	0.173574
chr1	12209148	12214283	5136	chr1	12570966	12572444	1479	359989	2.60836	3.84426	1.8518	0.173574
chr1	12209148	12214283	5136	chr1	12763387	12765099	1713	552527	-2.09517	3.84518	0.973285	0.323862
chr1	12209148	12214283	5136	chr1	14026463	14031622	5160	1817327	0.572394	4.4741	0.248366	0.618228
chr1	12209148	12214283	5136	chr1	14054076	14062507	8432	1846576	-1.2081	4.36992	0.773664	0.379086
chr1	12209148	12214283	5136	chr1	14074332	14078350	4019	1864625	2.60836	3.84426	1.8518	0.173574
chr1	12220724	12223575	2852	chr1	12236226	12237801	1576	14864	2.60836	3.84426	1.8518	0.173574
chr1	12220724	12223575	2852	chr1	12252208	12254278	2071	31093	-2.09501	3.84509	0.973196	0.323884
chr1	12220724	12223575	2852	chr1	12289647	12291821	2175	68584	0.51335	3.99501	0.0945291	0.758496
chr1	12252208	12254278	2071	chr1	12404142	12406790	2649	152223	-2.09501	3.84509	0.973196	0.323884
chr1	12268953	12270536	1584	chr1	12289647	12291821	2175	20989	3.47568	3.9942	3.63313	0.0566402
chr1	12268953	12270536	1584	chr1	12445464	12447332	1869	176653	-2.09501	3.84509	0.973196	0.323884
chr1	12289647	12291821	2175	chr1	12445464	12447332	1869	155664	2.60836	3.84426	1.8518	0.173574
chr1	12289647	12291821	2175	chr1	14264818	14266476	1659	1974913	-2.09501	3.84509	0.973196	0.323884
chr1	12869004	12870653	1650	chr1	14264818	14266476	1659	1395818	-2.09501	3.84509	0.973196	0.323884
chr1	13967998	13969858	1861	chr1	13991928	13995048	3121	24560	0.0401363	4.36931	0.00112201	0.973279
chr1	13967998	13969858	1861	chr1	14026463	14031622	5160	60114	1.1476	4.38966	0.861537	0.353309
chr1	13967998	13969858	1861	chr1	14054076	14062507	8432	89363	0.0404524	4.36914	0.00113756	0.973094
chr1	13967998	13969858	1861	chr1	14074332	14078350	4019	107413	-2.91553	3.99592	1.92409	0.165407
chr1	13967998	13969858	1861	chr1	14155148	14156869	1722	187080	2.60836	3.84426	1.8518	0.173574
chr1	13991928	13995048	3121	chr1	14026463	14031622	5160	35554	0.313833	5.80581	0.217013	0.641325
chr1	13991928	13995048	3121	chr1	14039206	14041008	1803	46619	0.572394	4.4741	0.248366	0.618228
chr1	13991928	13995048	3121	chr1	14054076	14062507	8432	64803	0.984621	5.522	1.837	0.175302
chr1	13991928	13995048	3121	chr1	14074332	14078350	4019	82853	-3.81646	4.25645	3.76266	0.0524092
chr1	13991928	13995048	3121	chr1	14137701	14139895	2195	145310	-0.307176	4.13137	0.0400325	0.841417
chr1	13991928	13995048	3121	chr1	14155148	14156869	1722	162520	1.38051	4.13056	0.870365	0.350854
chr1	13991928	13995048	3121	chr1	14645171	14649546	4376	653870	-2.09517	3.84518	0.973285	0.323862
chr1	13991928	13995048	3121	chr1	14660065	14661760	1696	667424	-2.09501	3.84509	0.973196	0.323884
chr1	13991928	13995048	3121	chr1	14695665	14698255	2591	703472	2.60836	3.84426	1.8518	0.173574
chr1	13991928	13995048	3121	chr1	15726619	15728750	2132	1734196	2.60836	3.84426	1.8518	0.173574
chr1	14026463	14031622	5160	chr1	14039206	14041008	1803	11064	-0.706015	6.64534	1.53139	0.215904
chr1	14026463	14031622	5160	chr1	14054076	14062507	8432	29249	0.106988	7.67667	0.0543905	0.815592
chr1	14026463	14031622	5160	chr1	14074332	14078350	4019	47298	-0.4141	5.6441	0.329993	0.565663
chr1	14026463	14031622	5160	chr1	14137701	14139895	2195	109755	-1.75882	4.57419	1.87497	0.170907
chr1	14026463	14031622	5160	chr1	14155148	14156869	1722	126966	-2.91569	3.99601	1.92426	0.165388
chr1	14026463	14031622	5160	chr1	14264818	14266476	1659	236604	2.60836	3.84426	1.8518	0.173574
chr1	14026463	14031622	5160	chr1	14645171	14649546	4376	618316	2.60836	3.84426	1.8518	0.173574
chr1	14026463	14031622	5160	chr1	14695665	14698255	2591	667917	-2.09517	3.84518	0.973285	0.323862
chr1	14026463	14031622	5160	chr1	14716524	14719757	3234	689098	-2.09517	3.84518	0.973285	0.323862
chr1	14026463	14031622	5160	chr1	15206078	15210142	4065	1179067	-2.09517	3.84518	0.973285	0.323862
chr1	14026463	14031622	5160	chr1	15331214	15333503	2290	1303316	2.60836	3.84426	1.8518	0.173574
chr1	14026463	14031622	5160	chr1	15455500	15457103	1604	1427259	-2.09501	3.84509	0.973196	0.323884
chr1	14026463	14031622	5160	chr1	15687065	15690305	3241	1659642	3.47568	3.9942	3.63313	0.0566402
chr1	14026463	14031622	5160	chr1	15841534	15843026	1493	1813237	-2.09517	3.84518	0.973285	0.323862
chr1	14026463	14031622	5160	chr1	15849744	15853967	4224	1822813	0.51335	3.99501	0.0945291	0.758496
chr1	14026463	14031622	5160	chr1	15897046	15900577	3532	1869769	3.47568	3.9942	3.63313	0.0566402
chr1	14026463	14031622	5160	chr1	15910342	15912494	2153	1882375	-2.09517	3.84518	0.973285	0.323862
chr1	14039206	14041008	1803	chr1	14054076	14062507	8432	18184	-0.0656309	5.35124	0.00674522	0.934544
chr1	14039206	14041008	1803	chr1	14074332	14078350	4019	36234	-0.827188	4.25583	0.330517	0.565355
chr1	14039206	14041008	1803	chr1	14695665	14698255	2591	656853	2.60836	3.84426	1.8518	0.173574
chr1	14039206	14041008	1803	chr1	14716524	14719757	3234	678033	-2.09501	3.84509	0.973196	0.323884
chr1	14039206	14041008	1803	chr1	15897046	15900577	3532	1858704	2.60836	3.84426	1.8518	0.173574
chr1	14054076	14062507	8432	chr1	14074332	14078350	4019	18049	0.248832	5.70472	0.130676	0.717732
chr1	14054076	14062507	8432	chr1	14137701	14139895	2195	80506	0.572236	4.47418	0.248239	0.618318
chr1	14054076	14062507	8432	chr1	14155148	14156869	1722	97717	2.60836	3.84426	1.8518	0.173574
chr1	14054076	14062507	8432	chr1	15687065	15690305	3241	1630393	-2.91537	3.99583	1.92392	0.165425
chr1	14054076	14062507	8432	chr1	15726619	15728750	2132	1669393	2.60836	3.84426	1.8518	0.173574
chr1	14054076	14062507	8432	chr1	15735648	15737809	2162	1678437	-2.91553	3.99592	1.92409	0.165407
chr1	14054076	14062507	8432	chr1	15942830	15945858	3029	1886052	-2.91537	3.99583	1.92392	0.165425
chr1	14054076	14062507	8432	chr1	16022391	16025281	2891	1965544	2.60836	3.84426	1.8518	0.173574
chr1	14074332	14078350	4019	chr1	14645171	14649546	4376	571017	-2.09501	3.84509	0.973196	0.323884
chr1	14074332	14078350	4019	chr1	15849744	15853967	4224	1775514	2.60836	3.84426	1.8518	0.173574
chr1	14137701	14139895	2195	chr1	15890114	15891681	1568	1752099	-2.09517	3.84518	0.973285	0.323862
chr1	14155148	14156869	1722	chr1	14695665	14698255	2591	540951	2.60836	3.84426	1.8518	0.173574
chr1	14264818	14266476	1659	chr1	14695665	14698255	2591	431313	2.60836	3.84426	1.8518	0.173574
[truncated: 169,359 more rows]

## Sheet: EBNA2+ vs EBNA2-
chromosome (left)	start (left)	end (left)	anchor_length (left)	chromosome (right)	start (right)	end (right)	anchor_length (right)	loopWidth	logFC	logCPM	LR	PValue
chr1	712255	716177	3923	chr1	761744	764405	2662	48858	-0.30751	4.13123	0.0400427	0.841397
chr1	712255	716177	3923	chr1	947693	951090	3398	235175	-2.095	3.84505	0.972829	0.323976
chr1	712255	716177	3923	chr1	1061928	1065340	3413	349418	-2.095	3.84505	0.972829	0.323976
chr1	712255	716177	3923	chr1	1078194	1081930	3737	365846	-2.095	3.84505	0.972829	0.323976
chr1	712255	716177	3923	chr1	1259028	1262182	3155	546389	-2.09518	3.84514	0.972921	0.323953
chr1	712255	716177	3923	chr1	1341072	1344217	3146	628428	-2.09518	3.84514	0.972921	0.323953
chr1	712255	716177	3923	chr1	1405386	1409111	3726	693032	0.513019	3.99491	0.0943216	0.758753
chr1	712255	716177	3923	chr1	1608442	1611221	2780	895615	2.60802	3.8442	1.85064	0.173709
chr1	712255	716177	3923	chr1	1762950	1767893	4944	1051205	2.60802	3.8442	1.85064	0.173709
chr1	712255	716177	3923	chr1	1830551	1833838	3288	1117978	-2.095	3.84505	0.972829	0.323976
chr1	712255	716177	3923	chr1	1868118	1870808	2691	1155247	-2.095	3.84505	0.972829	0.323976
chr1	712255	716177	3923	chr1	2424097	2429120	5024	1712392	-2.09518	3.84514	0.972921	0.323953
chr1	761744	764405	2662	chr1	893040	896870	3831	131880	2.60802	3.8442	1.85064	0.173709
chr1	761744	764405	2662	chr1	1309279	1312529	3251	547829	-2.095	3.84505	0.972829	0.323976
chr1	761744	764405	2662	chr1	2476096	2481428	5333	1715687	-2.095	3.84505	0.972829	0.323976
chr1	893040	896870	3831	chr1	947693	951090	3398	54436	-2.91553	3.99584	1.92268	0.165562
chr1	893040	896870	3831	chr1	1070688	1076581	5894	178679	-0.30751	4.13123	0.0400427	0.841397
chr1	893040	896870	3831	chr1	1078194	1081930	3737	185107	-2.09518	3.84514	0.972921	0.323953
chr1	893040	896870	3831	chr1	1091969	1094657	2689	198358	2.60802	3.8442	1.85064	0.173709
chr1	893040	896870	3831	chr1	1165102	1167882	2781	271537	2.60802	3.8442	1.85064	0.173709
chr1	893040	896870	3831	chr1	1240233	1245867	5635	348095	0.513019	3.99491	0.0943216	0.758753
chr1	893040	896870	3831	chr1	1309279	1312529	3251	415949	-2.09518	3.84514	0.972921	0.323953
chr1	893040	896870	3831	chr1	1341072	1344217	3146	447689	2.60802	3.8442	1.85064	0.173709
chr1	947693	951090	3398	chr1	1017648	1019543	1896	69204	-2.09518	3.84514	0.972921	0.323953
chr1	947693	951090	3398	chr1	1070688	1076581	5894	124243	3.47504	3.99407	3.62873	0.05679
chr1	947693	951090	3398	chr1	1078194	1081930	3737	130670	-0.307342	4.13114	0.0400045	0.841472
chr1	947693	951090	3398	chr1	1091969	1094657	2689	143921	2.60802	3.8442	1.85064	0.173709
chr1	947693	951090	3398	chr1	1112754	1114681	1928	164326	0.513019	3.99491	0.0943216	0.758753
chr1	947693	951090	3398	chr1	1165102	1167882	2781	217100	-2.91553	3.99584	1.92268	0.165562
chr1	947693	951090	3398	chr1	1207484	1210739	3256	259720	0.512846	3.995	0.0942706	0.758817
chr1	947693	951090	3398	chr1	1240233	1245867	5635	293658	-0.30751	4.13123	0.0400427	0.841397
chr1	947693	951090	3398	chr1	1259028	1262182	3155	311213	-2.095	3.84505	0.972829	0.323976
chr1	947693	951090	3398	chr1	1309279	1312529	3251	361512	-2.095	3.84505	0.972829	0.323976
chr1	947693	951090	3398	chr1	1332499	1337197	4699	385456	-2.91553	3.99584	1.92268	0.165562
chr1	947693	951090	3398	chr1	1445583	1448736	3154	497768	-2.09518	3.84514	0.972921	0.323953
chr1	947693	951090	3398	chr1	1549906	1552004	2099	601563	2.60802	3.8442	1.85064	0.173709
chr1	947693	951090	3398	chr1	1708427	1715416	6990	762530	0.512846	3.995	0.0942706	0.758817
chr1	947693	951090	3398	chr1	1762950	1767893	4944	816030	2.60802	3.8442	1.85064	0.173709
chr1	947693	951090	3398	chr1	1771243	1776487	5245	824473	-2.09518	3.84514	0.972921	0.323953
chr1	947693	951090	3398	chr1	2476096	2481428	5333	1529370	-2.09518	3.84514	0.972921	0.323953
chr1	993840	996417	2578	chr1	1070688	1076581	5894	78506	2.60802	3.8442	1.85064	0.173709
chr1	993840	996417	2578	chr1	1091969	1094657	2689	98184	-2.09518	3.84514	0.972921	0.323953
chr1	993840	996417	2578	chr1	1240233	1245867	5635	247921	-2.09518	3.84514	0.972921	0.323953
chr1	993840	996417	2578	chr1	1309279	1312529	3251	315775	2.60802	3.8442	1.85064	0.173709
chr1	993840	996417	2578	chr1	1405386	1409111	3726	412120	-2.095	3.84505	0.972829	0.323976
chr1	993840	996417	2578	chr1	1793456	1798169	4714	800684	2.60802	3.8442	1.85064	0.173709
chr1	1017648	1019543	1896	chr1	1263249	1268476	5228	247267	-2.09518	3.84514	0.972921	0.323953
chr1	1017648	1019543	1896	chr1	1309279	1312529	3251	292308	0.513019	3.99491	0.0943216	0.758753
chr1	1017648	1019543	1896	chr1	1549906	1552004	2099	532359	2.60802	3.8442	1.85064	0.173709
chr1	1017648	1019543	1896	chr1	1563763	1567186	3424	546879	-2.095	3.84505	0.972829	0.323976
chr1	1061928	1065340	3413	chr1	1070688	1076581	5894	10000	0.0396541	4.369	0.00109561	0.973595
chr1	1061928	1065340	3413	chr1	1078194	1081930	3737	16428	-2.095	3.84505	0.972829	0.323976
chr1	1061928	1065340	3413	chr1	1235008	1236742	1735	172241	-2.09518	3.84514	0.972921	0.323953
chr1	1061928	1065340	3413	chr1	1240233	1245867	5635	179416	-2.09518	3.84514	0.972921	0.323953
chr1	1061928	1065340	3413	chr1	1332499	1337197	4699	271214	-2.09518	3.84514	0.972921	0.323953
chr1	1061928	1065340	3413	chr1	1405386	1409111	3726	343614	-2.095	3.84505	0.972829	0.323976
chr1	1061928	1065340	3413	chr1	1837198	1841609	4412	775769	2.60802	3.8442	1.85064	0.173709
chr1	1070688	1076581	5894	chr1	1078194	1081930	3737	6427	-0.209835	6.21681	0.115245	0.73425
chr1	1070688	1076581	5894	chr1	1091969	1094657	2689	19678	-2.46787	4.91022	4.36036	0.0367846
chr1	1070688	1076581	5894	chr1	1112754	1114681	1928	40083	-2.9157	3.99593	1.92285	0.165543
chr1	1070688	1076581	5894	chr1	1165102	1167882	2781	92857	1.43856	4.15264	0.932238	0.334282
chr1	1070688	1076581	5894	chr1	1207484	1210739	3256	135477	-3.43506	4.13196	2.8502	0.0913623
chr1	1070688	1076581	5894	chr1	1235008	1236742	1735	162240	-0.30751	4.13123	0.0400427	0.841397
chr1	1070688	1076581	5894	chr1	1240233	1245867	5635	169415	-1.14811	4.39165	0.700231	0.402706
chr1	1070688	1076581	5894	chr1	1259028	1262182	3155	186970	2.60802	3.8442	1.85064	0.173709
chr1	1070688	1076581	5894	chr1	1284938	1289967	5030	213818	-2.09518	3.84514	0.972921	0.323953
chr1	1070688	1076581	5894	chr1	1296637	1298764	2128	224066	-2.09518	3.84514	0.972921	0.323953
chr1	1070688	1076581	5894	chr1	1309279	1312529	3251	237269	2.60802	3.8442	1.85064	0.173709
chr1	1070688	1076581	5894	chr1	1332499	1337197	4699	261213	2.60802	3.8442	1.85064	0.173709
chr1	1070688	1076581	5894	chr1	1341072	1344217	3146	269010	-2.095	3.84505	0.972829	0.323976
chr1	1070688	1076581	5894	chr1	1563763	1567186	3424	491840	-2.09518	3.84514	0.972921	0.323953
chr1	1070688	1076581	5894	chr1	1708427	1715416	6990	638287	-2.09518	3.84514	0.972921	0.323953
chr1	1070688	1076581	5894	chr1	1771243	1776487	5245	700230	4.0067	4.12949	5.34023	0.0208387
chr1	1070688	1076581	5894	chr1	1820228	1824568	4341	748763	-2.09518	3.84514	0.972921	0.323953
chr1	1070688	1076581	5894	chr1	1837198	1841609	4412	765769	2.60802	3.8442	1.85064	0.173709
chr1	1070688	1076581	5894	chr1	2476096	2481428	5333	1405127	-2.09518	3.84514	0.972921	0.323953
chr1	1078194	1081930	3737	chr1	1091969	1094657	2689	13251	-0.885876	5.25981	1.04171	0.307423
chr1	1078194	1081930	3737	chr1	1112754	1114681	1928	33655	2.35059	4.38925	3.26847	0.0706235
chr1	1078194	1081930	3737	chr1	1165102	1167882	2781	86430	-0.64295	4.57307	0.30939	0.578055
chr1	1078194	1081930	3737	chr1	1207484	1210739	3256	129049	-0.584564	4.59488	0.257831	0.611614
chr1	1078194	1081930	3737	chr1	1235008	1236742	1735	155813	1.37987	4.13041	0.868183	0.351459
chr1	1078194	1081930	3737	chr1	1240233	1245867	5635	162988	-0.30751	4.13123	0.0400427	0.841397
chr1	1078194	1081930	3737	chr1	1259028	1262182	3155	180543	-2.9157	3.99593	1.92285	0.165543
chr1	1078194	1081930	3737	chr1	1263249	1268476	5228	185800	-2.09518	3.84514	0.972921	0.323953
chr1	1078194	1081930	3737	chr1	1309279	1312529	3251	230842	-0.30751	4.13123	0.0400427	0.841397
chr1	1078194	1081930	3737	chr1	1332499	1337197	4699	254786	2.66834	3.86675	1.90086	0.167982
chr1	1078194	1081930	3737	chr1	1341072	1344217	3146	262582	-2.095	3.84505	0.972829	0.323976
chr1	1078194	1081930	3737	chr1	1445583	1448736	3154	367097	-2.095	3.84505	0.972829	0.323976
chr1	1078194	1081930	3737	chr1	1589400	1591756	2357	510516	2.60802	3.8442	1.85064	0.173709
chr1	1078194	1081930	3737	chr1	1608442	1611221	2780	529769	-2.095	3.84505	0.972829	0.323976
chr1	1078194	1081930	3737	chr1	1708427	1715416	6990	631859	-3.81677	4.25647	3.758	0.0525554
chr1	1078194	1081930	3737	chr1	1762950	1767893	4944	685359	-2.09518	3.84514	0.972921	0.323953
chr1	1078194	1081930	3737	chr1	1771243	1776487	5245	693803	0.512846	3.995	0.0942706	0.758817
chr1	1078194	1081930	3737	chr1	1793456	1798169	4714	715750	-2.095	3.84505	0.972829	0.323976
chr1	1078194	1081930	3737	chr1	2042114	2045694	3581	963842	2.60802	3.8442	1.85064	0.173709
chr1	1091969	1094657	2689	chr1	1112754	1114681	1928	20404	-2.095	3.84505	0.972829	0.323976
chr1	1091969	1094657	2689	chr1	1165102	1167882	2781	73179	0.618203	4.27677	0.209886	0.646857
chr1	1091969	1094657	2689	chr1	1207484	1210739	3256	115798	-2.095	3.84505	0.972829	0.323976
chr1	1091969	1094657	2689	chr1	1235008	1236742	1735	142562	-2.09518	3.84514	0.972921	0.323953
chr1	1091969	1094657	2689	chr1	1240233	1245867	5635	149737	0.512846	3.995	0.0942706	0.758817
chr1	1091969	1094657	2689	chr1	1284938	1289967	5030	194139	-2.09518	3.84514	0.972921	0.323953
chr1	1091969	1094657	2689	chr1	1332499	1337197	4699	241535	2.60802	3.8442	1.85064	0.173709
chr1	1091969	1094657	2689	chr1	1341072	1344217	3146	249331	3.53374	4.01646	3.7237	0.0536452
chr1	1091969	1094657	2689	chr1	1549906	1552004	2099	457642	-2.91536	3.99575	1.9225	0.165581
chr1	1091969	1094657	2689	chr1	1730421	1734323	3903	639059	-2.9157	3.99593	1.92285	0.165543
chr1	1091969	1094657	2689	chr1	1771243	1776487	5245	680552	-2.095	3.84505	0.972829	0.323976
chr1	1091969	1094657	2689	chr1	1837198	1841609	4412	746090	-2.095	3.84505	0.972829	0.323976
chr1	1112754	1114681	1928	chr1	1165102	1167882	2781	52774	-2.91536	3.99575	1.9225	0.165581
chr1	1112754	1114681	1928	chr1	1240233	1245867	5635	129332	-2.095	3.84505	0.972829	0.323976
chr1	1165102	1167882	2781	chr1	1207484	1210739	3256	42619	0.513019	3.99491	0.0943216	0.758753
chr1	1165102	1167882	2781	chr1	1235008	1236742	1735	69383	-2.095	3.84505	0.972829	0.323976
chr1	1165102	1167882	2781	chr1	1240233	1245867	5635	76558	0.512846	3.995	0.0942706	0.758817
chr1	1165102	1167882	2781	chr1	1259028	1262182	3155	94113	-2.91553	3.99584	1.92268	0.165562
chr1	1165102	1167882	2781	chr1	1263249	1268476	5228	99370	2.60802	3.8442	1.85064	0.173709
chr1	1165102	1167882	2781	chr1	1332499	1337197	4699	168356	-0.307342	4.13114	0.0400045	0.841472
chr1	1165102	1167882	2781	chr1	1445583	1448736	3154	280667	2.60802	3.8442	1.85064	0.173709
chr1	1165102	1167882	2781	chr1	1492415	1494050	1636	326740	2.60802	3.8442	1.85064	0.173709
chr1	1165102	1167882	2781	chr1	1664867	1666259	1393	499071	-2.09518	3.84514	0.972921	0.323953
chr1	1165102	1167882	2781	chr1	1708427	1715416	6990	545429	-1.20859	4.36979	0.772367	0.379486
chr1	1165102	1167882	2781	chr1	1762950	1767893	4944	598929	-2.09518	3.84514	0.972921	0.323953
chr1	1165102	1167882	2781	chr1	2515688	2518612	2925	1350658	2.60802	3.8442	1.85064	0.173709
chr1	1207484	1210739	3256	chr1	1240233	1245867	5635	33938	1.38004	4.13032	0.868372	0.351406
chr1	1207484	1210739	3256	chr1	1259028	1262182	3155	51493	0.512846	3.995	0.0942706	0.758817
chr1	1207484	1210739	3256	chr1	1284938	1289967	5030	78341	-2.91536	3.99575	1.9225	0.165581
chr1	1207484	1210739	3256	chr1	1332499	1337197	4699	125736	2.66834	3.86675	1.90086	0.167982
chr1	1207484	1210739	3256	chr1	1405386	1409111	3726	198137	-2.09518	3.84514	0.972921	0.323953
chr1	1207484	1210739	3256	chr1	1445583	1448736	3154	238048	-2.095	3.84505	0.972829	0.323976
chr1	1207484	1210739	3256	chr1	1508932	1511325	2394	301017	0.513019	3.99491	0.0943216	0.758753
chr1	1207484	1210739	3256	chr1	1664867	1666259	1393	456451	2.60802	3.8442	1.85064	0.173709
chr1	1207484	1210739	3256	chr1	1730421	1734323	3903	523260	-2.09518	3.84514	0.972921	0.323953
chr1	1207484	1210739	3256	chr1	1762950	1767893	4944	556310	2.60802	3.8442	1.85064	0.173709
chr1	1207484	1210739	3256	chr1	1771243	1776487	5245	564753	0.513019	3.99491	0.0943216	0.758753
chr1	1207484	1210739	3256	chr1	2042114	2045694	3581	834792	-2.095	3.84505	0.972829	0.323976
chr1	1235008	1236742	1735	chr1	1240233	1245867	5635	7175	0.00528917	4.70738	2.99524e-07	0.999563
chr1	1235008	1236742	1735	chr1	1259028	1262182	3155	24730	0.513019	3.99491	0.0943216	0.758753
chr1	1235008	1236742	1735	chr1	1296637	1298764	2128	61825	-2.09518	3.84514	0.972921	0.323953
chr1	1235008	1236742	1735	chr1	1309279	1312529	3251	75029	-2.9157	3.99593	1.92285	0.165543
chr1	1235008	1236742	1735	chr1	1332499	1337197	4699	98973	2.60802	3.8442	1.85064	0.173709
chr1	1235008	1236742	1735	chr1	1445583	1448736	3154	211284	3.47504	3.99407	3.62873	0.05679
chr1	1235008	1236742	1735	chr1	1589400	1591756	2357	354703	2.60802	3.8442	1.85064	0.173709
chr1	1235008	1236742	1735	chr1	2476096	2481428	5333	1242887	-2.91536	3.99575	1.9225	0.165581
chr1	1240233	1245867	5635	chr1	1259028	1262182	3155	17555	0.741765	5.17626	0.823187	0.36425
chr1	1240233	1245867	5635	chr1	1263249	1268476	5228	22812	-2.09518	3.84514	0.972921	0.323953
chr1	1240233	1245867	5635	chr1	1284938	1289967	5030	44402	-2.09518	3.84514	0.972921	0.323953
chr1	1240233	1245867	5635	chr1	1296637	1298764	2128	54650	-2.09518	3.84514	0.972921	0.323953
chr1	1240233	1245867	5635	chr1	1309279	1312529	3251	67854	-0.341727	4.47476	0.0807548	0.776277
chr1	1240233	1245867	5635	chr1	1332499	1337197	4699	91798	-1.75871	4.57367	1.86885	0.171607
chr1	1240233	1245867	5635	chr1	1341072	1344217	3146	99594	-2.91536	3.99575	1.9225	0.165581
chr1	1240233	1245867	5635	chr1	1405386	1409111	3726	164198	0.512846	3.995	0.0942706	0.758817
chr1	1240233	1245867	5635	chr1	1445583	1448736	3154	204109	-2.91536	3.99575	1.9225	0.165581
chr1	1240233	1245867	5635	chr1	1492415	1494050	1636	250182	-2.095	3.84505	0.972829	0.323976
chr1	1240233	1245867	5635	chr1	1608442	1611221	2780	366781	0.512846	3.995	0.0942706	0.758817
chr1	1240233	1245867	5635	chr1	1623327	1625328	2002	381277	-2.09518	3.84514	0.972921	0.323953
chr1	1240233	1245867	5635	chr1	1754631	1756089	1459	512310	2.66834	3.86675	1.90086	0.167982
chr1	1240233	1245867	5635	chr1	1820228	1824568	4341	579348	-2.095	3.84505	0.972829	0.323976
chr1	1240233	1245867	5635	chr1	2185818	2188841	3024	944279	2.60802	3.8442	1.85064	0.173709
chr1	1240233	1245867	5635	chr1	2507996	2510952	2957	1266424	-2.095	3.84505	0.972829	0.323976
chr1	1259028	1262182	3155	chr1	1263249	1268476	5228	5257	2.50903	4.87057	6.08741	0.0136149
chr1	1259028	1262182	3155	chr1	1284938	1289967	5030	26847	-3.8163	4.25621	3.75704	0.0525855
chr1	1259028	1262182	3155	chr1	1296637	1298764	2128	37095	-3.43523	4.13205	2.85046	0.0913481
chr1	1259028	1262182	3155	chr1	1309279	1312529	3251	50299	-2.91536	3.99575	1.9225	0.165581
chr1	1259028	1262182	3155	chr1	1332499	1337197	4699	74243	-1.75916	4.57391	1.86981	0.171497
chr1	1259028	1262182	3155	chr1	1341072	1344217	3146	82039	1.38004	4.13032	0.868372	0.351406
chr1	1259028	1262182	3155	chr1	1405386	1409111	3726	146643	-2.09518	3.84514	0.972921	0.323953
chr1	1259028	1262182	3155	chr1	1445583	1448736	3154	186554	-2.095	3.84505	0.972829	0.323976
chr1	1259028	1262182	3155	chr1	1549906	1552004	2099	290350	2.66834	3.86675	1.90086	0.167982
chr1	1259028	1262182	3155	chr1	1563763	1567186	3424	304869	0.513019	3.99491	0.0943216	0.758753
chr1	1259028	1262182	3155	chr1	1608442	1611221	2780	349226	-2.09518	3.84514	0.972921	0.323953
chr1	1259028	1262182	3155	chr1	1623327	1625328	2002	363722	0.513019	3.99491	0.0943216	0.758753
chr1	1259028	1262182	3155	chr1	1708427	1715416	6990	451316	-2.9157	3.99593	1.92285	0.165543
chr1	1259028	1262182	3155	chr1	1771243	1776487	5245	513260	0.512846	3.995	0.0942706	0.758817
chr1	1259028	1262182	3155	chr1	1837198	1841609	4412	578798	1.37987	4.13041	0.868183	0.351459
chr1	1259028	1262182	3155	chr1	2476096	2481428	5333	1218157	-2.095	3.84505	0.972829	0.323976
chr1	1263249	1268476	5228	chr1	1309279	1312529	3251	45041	0.512846	3.995	0.0942706	0.758817
chr1	1263249	1268476	5228	chr1	1332499	1337197	4699	68985	-2.91536	3.99575	1.9225	0.165581
chr1	1263249	1268476	5228	chr1	1508932	1511325	2394	244266	2.66834	3.86675	1.90086	0.167982
chr1	1263249	1268476	5228	chr1	1563763	1567186	3424	299612	2.60802	3.8442	1.85064	0.173709
chr1	1263249	1268476	5228	chr1	1771243	1776487	5245	508002	2.60802	3.8442	1.85064	0.173709
chr1	1263249	1268476	5228	chr1	1837198	1841609	4412	573541	-2.09518	3.84514	0.972921	0.323953
chr1	1284938	1289967	5030	chr1	1296637	1298764	2128	10248	-3.43506	4.13196	2.8502	0.0913623
chr1	1284938	1289967	5030	chr1	1309279	1312529	3251	23451	-2.91553	3.99584	1.92268	0.165562
chr1	1284938	1289967	5030	chr1	1332499	1337197	4699	47395	-0.307342	4.13114	0.0400045	0.841472
chr1	1284938	1289967	5030	chr1	1341072	1344217	3146	55192	-2.91553	3.99584	1.92268	0.165562
chr1	1284938	1289967	5030	chr1	1445583	1448736	3154	159707	-0.766886	4.27758	0.287237	0.591997
chr1	1284938	1289967	5030	chr1	1508932	1511325	2394	222676	-2.095	3.84505	0.972829	0.323976
chr1	1284938	1289967	5030	chr1	1563763	1567186	3424	278022	-2.095	3.84505	0.972829	0.323976
chr1	1284938	1289967	5030	chr1	1730421	1734323	3903	444919	2.60802	3.8442	1.85064	0.173709
chr1	1296637	1298764	2128	chr1	1309279	1312529	3251	13203	-1.14843	4.39183	0.700596	0.402584
chr1	1296637	1298764	2128	chr1	1332499	1337197	4699	37147	-2.095	3.84505	0.972829	0.323976
chr1	1296637	1298764	2128	chr1	1341072	1344217	3146	44944	0.513019	3.99491	0.0943216	0.758753
chr1	1296637	1298764	2128	chr1	1405386	1409111	3726	109548	3.47504	3.99407	3.62873	0.05679
chr1	1296637	1298764	2128	chr1	1708427	1715416	6990	414221	-2.09518	3.84514	0.972921	0.323953
chr1	1296637	1298764	2128	chr1	1771243	1776487	5245	476164	2.60802	3.8442	1.85064	0.173709
chr1	1309279	1312529	3251	chr1	1332499	1337197	4699	23944	-0.614554	5.45613	0.619993	0.43105
chr1	1309279	1312529	3251	chr1	1341072	1344217	3146	31740	0.571316	4.4739	0.246712	0.6194
[truncated: 171,163 more rows]

## Sheet: EBNA2-dependent loop gains
chromosome (left)	start (left)	end (left)	chromosome (right)	start (right)	end (right)
[truncated: 1,432 more rows]

[truncated: 1 more sheets: EBNA2-dependent loop losses]
