# Supplementary material for: Epstein-Barr virus nuclear antigen 2 (EBNA2) extensively rewires the human chromatin landscape at autoimmune risk loci
Source: bioRxiv preprint, doi:10.1101/2020.04.15.043612, version 2 (2021-01-27)
Supplement: Supplemental Table S10 [file 043612_file22.xlsx]

## Sheet: README
Epstein-Barr virus nuclear antigen 2 (EBNA2) extensively rewires the human chromatin landscape at autoimmune risk loci
This document contains the RELI results of HiChIP-seq peaks of EBNA2+, EBNA2- and uninfected cells, using the RELI TF and Non TF libraries.
Comments, additions, or subtractions should be addressed to the corresponding authors:
Lean Kottyan (Leah.Kottyan@cchmc.org)
Matt Weirauch (Matthew.Weirauch@cchmc.org)
The first tab contains the RELI results of HiChIP-seq peaks of EBNA2+ cells against the RELI TF library.
The second tab contains the RELI results of HiChIP-seq peaks of EBNA2+ cells against the RELI Non TF library.
The third tab contains the RELI results of HiChIP-seq peaks of EBNA2- cells against the RELI TF library.
The fourth tab contains the RELI results of HiChIP-seq peaks of EBNA2- cells against the RELI Non TF library.
The fifth tab contains the RELI results of HiChIP-seq peaks of uninfected cells against the RELI TF library.
The sixth tab contains the RELI results of HiChIP-seq peaks of uninfected cells against the RELI Non TF library.
The columns in the all of the tabs are identical:
Track	Data track of the library dataset.
Cell	Cells from which the library dataset was generated.
Label	Name of the library dataset.
Overlap	Overlap count (number of peaks with intersecting genomic coordinates).
Total	Total number of peaks in the input set.
Ratio	Ratio of overlap count divided by total count.
Mean	Expected mean of intersection count from 2000 permutation test.
STD	Standard deviation from 2000 permutation test.
Z-score	Z-score calculated from 2000 permutation test.
Enrichment	Enrichment from 2000 permutation test (Overlap divided by Mean)
P-val	p-value calculated from 2000 permutation test.
Corrected P-val	Adjusted p-value usin Bonferroni correction.
Null_Model	Null model used in this analysis.
Species	Species for the library dataset.

## Sheet: EBNA2+ Loop TF RELI
Track	Cell	Label	Overlap	Total	Ratio	Mean	STD	Z-score	Enrichment	P-val	Corrected P-val	Null_Model	Species
Cistrome_ChIP	LY1	BRD4	173933	273378	0.636236	27879.4	3270.52	44.6576	6.23875	0	0	Null_Model_OpenChrom	human
ReMap_ChIP	lcl_bl41	MYC	151860	273378	0.555495	22117.3	2905.38	44.656	6.86612	0	0	Null_Model_OpenChrom	human
Misc_ChIP	BCells+Sendai_Virus	NELFA	122178	273378	0.44692	15179.8	2396.09	44.6554	8.0487	0	0	Null_Model_OpenChrom	human
Misc_ChIP	BCells	NELFA	109110	273378	0.399118	12080.8	2172.91	44.6541	9.03171	0	0	Null_Model_OpenChrom	human
TxnFactorChIPV3	Raji	POLR2A	142918	273378	0.522785	21132.8	2727.38	44.6527	6.76284	0	0	Null_Model_OpenChrom	human
Cistrome_ChIP	LY1+JQ1	BRD4	129751	273378	0.474621	17791.4	2507.49	44.6501	7.29289	0	0	Null_Model_OpenChrom	human
ReMap_ChIP	lcl_raji	MYC	91972	273378	0.336428	10667.1	1821.14	44.645	8.62201	0	0	Null_Model_OpenChrom	human
Cistrome_ChIP	P493-6+T1	MAX	165246	273378	0.60446	30321.9	3022.22	44.6441	5.44972	0	0	Null_Model_OpenChrom	human
Cistrome_ChIP	P493-6+T24	MAX	125734	273378	0.459927	18731.3	2396.83	44.6435	6.7125	0	0	Null_Model_OpenChrom	human
TxnFactorChIPV3	GM12878	TAF1	117706	273378	0.430561	16664.2	2263.32	44.6431	7.06339	0	0	Null_Model_OpenChrom	human
TxnFactorChIPV3	GM12878	ELF1	145500	273378	0.53223	25152.2	2695.85	44.6419	5.78479	0	0	Null_Model_OpenChrom	human
Cistrome_ChIP	Namalwa	PAX5	105674	273378	0.386549	13707.9	2060.09	44.6418	7.70901	0	0	Null_Model_OpenChrom	human
TxnFactorChIPV3	GM12878	PML	117863	273378	0.431136	17256.2	2253.66	44.6415	6.83018	0	0	Null_Model_OpenChrom	human
ReMap_ChIP	bcellp493-6	MAX	140592	273378	0.514277	22616.5	2642.8	44.6404	6.21635	0	0	Null_Model_OpenChrom	human
TxnFactorChIPV3	GM12878	SP1	125804	273378	0.460183	19556.4	2380.1	44.64	6.43289	0	0	Null_Model_OpenChrom	human
TxnFactorChIPV3	GM18505	POLR2A	140136	273378	0.512609	24054	2600.42	44.6397	5.8259	0	0	Null_Model_OpenChrom	human
TxnFactorChIPV3	GM12891	POLR2A	144439	273378	0.528349	25712.2	2659.76	44.6382	5.61752	0	0	Null_Model_OpenChrom	human
ReMap_ChIP	p493_6_0hr	MAX	166355	273378	0.608516	33246.3	2982	44.6374	5.00372	0	0	Null_Model_OpenChrom	human
Cistrome_ChIP	GM12878	SP1	173241	273378	0.633705	36302	3067.91	44.636	4.77222	0	0	Null_Model_OpenChrom	human
Cistrome_ChIP	P493-6	MAX	183459	273378	0.671082	41436.7	3181.8	44.6359	4.42746	0	0	Null_Model_OpenChrom	human
TxnFactorChIPV3	GM12878	MXI1	124187	273378	0.454268	19312.2	2349.58	44.6356	6.43051	0	0	Null_Model_OpenChrom	human
TxnFactorChIPV3	GM12878	POLR2A	156855	273378	0.573766	31818.9	2801.27	44.6355	4.92961	0	0	Null_Model_OpenChrom	human
Misc_ChIP	GM12878	cRel	109605	273378	0.400928	15901.2	2099.33	44.6351	6.89289	0	0	Null_Model_OpenChrom	human
TxnFactorChIPV3	GM12878	CHD2	115203	273378	0.421406	17410.5	2190.95	44.6347	6.61688	0	0	Null_Model_OpenChrom	human
TxnFactorChIPV3	GM19193	POLR2A	137624	273378	0.50342	24075	2543.97	44.6346	5.71647	0	0	Null_Model_OpenChrom	human
TxnFactorChIPV3	GM19099	POLR2A	140776	273378	0.51495	24542.9	2604.11	44.6345	5.73591	0	0	Null_Model_OpenChrom	human
TxnFactorChIPV3	GM12891	TAF1	102003	273378	0.373121	14125.6	1968.82	44.6344	7.22113	0	0	Null_Model_OpenChrom	human
ReMap_ChIP	lcl_blue1	MYC	75741	273378	0.277056	8388.79	1509	44.6338	9.02883	0	0	Null_Model_OpenChrom	human
TxnFactorChIPV3	GM15510	POLR2A	130810	273378	0.478495	22254.1	2432.15	44.6337	5.87802	0	0	Null_Model_OpenChrom	human
TxnFactorChIPV3	GM12892	POLR2A	148450	273378	0.543021	28278.1	2692.4	44.6337	5.24964	0	0	Null_Model_OpenChrom	human
TxnFactorChIPV3	GM18951	POLR2A	137786	273378	0.504013	24371.6	2541.05	44.6328	5.65354	0	0	Null_Model_OpenChrom	human
Cistrome_ChIP	GM12878	PML	174925	273378	0.639865	38050.3	3066.73	44.6322	4.59721	0	0	Null_Model_OpenChrom	human
ReMap_ChIP	lclgm10861_calcitriol	VDR	113197	273378	0.414068	17102.4	2153.05	44.6319	6.6188	0	0	Null_Model_OpenChrom	human
TxnFactorChIPV3	GM18526	POLR2A	125929	273378	0.460641	20979.2	2351.51	44.6308	6.00255	0	0	Null_Model_OpenChrom	human
TxnFactorChIPV3	GM12878	MAZ	128193	273378	0.468922	22034	2378.64	44.6302	5.81797	0	0	Null_Model_OpenChrom	human
Misc_ChIP	GM12878	p52	132336	273378	0.484077	23299.4	2443.12	44.6301	5.6798	0	0	Null_Model_OpenChrom	human
Cistrome_ChIP	GM12878	PAX5	178538	273378	0.653081	41514.7	3070.27	44.6291	4.3006	0	0	Null_Model_OpenChrom	human
TxnFactorChIPV3	GM12878	MAX	103147	273378	0.377305	15567.5	1962.44	44.6278	6.62579	0	0	Null_Model_OpenChrom	human
Cistrome_ChIP	MM1.S+5um_JQ1	BRD4	133916	273378	0.489857	24084.6	2461.05	44.6278	5.56022	0	0	Null_Model_OpenChrom	human
Cistrome_ChIP	MM1.S+500nm_JQ1	BRD4	142196	273378	0.520144	27430.5	2571.63	44.6276	5.18386	0	0	Null_Model_OpenChrom	human
Cistrome_ChIP	MM1.S+50nm_JQ1	BRD4	159664	273378	0.584041	34146.7	2812.57	44.6273	4.67583	0	0	Null_Model_OpenChrom	human
TxnFactorChIPV3	GM12878	TBP	103048	273378	0.376943	15035.8	1972.19	44.6266	6.8535	0	0	Null_Model_OpenChrom	human
Cistrome_ChIP	MM1.S	MYC	143375	273378	0.524457	28281.6	2579.06	44.6262	5.06956	0	0	Null_Model_OpenChrom	human
Cistrome_ChIP	MM1.S+5nm_JQ1	BRD4	166727	273378	0.609877	38124.5	2881.78	44.6261	4.37323	0	0	Null_Model_OpenChrom	human
Cistrome_ChIP	MM1.S	BRD4	137896	273378	0.504415	26409.7	2498.24	44.6259	5.22142	0	0	Null_Model_OpenChrom	human
ReMap_ChIP	jurkat	ETS1	112152	273378	0.410245	17933.5	2111.3	44.6258	6.25377	0	0	Null_Model_OpenChrom	human
TxnFactorChIPV3	GM12892	TAF1	89830	273378	0.328593	12173.6	1740.17	44.6257	7.37905	0	0	Null_Model_OpenChrom	human
TxnFactorChIPV3	GM12878	POU2F2	125810	273378	0.460205	21478.1	2337.97	44.6249	5.85761	0	0	Null_Model_OpenChrom	human
Cistrome_ChIP	GM12878	MAX	136035	273378	0.497608	25434.9	2478.47	44.6244	5.34837	0	0	Null_Model_OpenChrom	human
TxnFactorChIPV3	GM12878	PAX5	139473	273378	0.510184	27539.7	2508.37	44.624	5.06443	0	0	Null_Model_OpenChrom	human
TxnFactorChIPV3	GM12878	TCF12	117971	273378	0.431531	20103.4	2193.19	44.6234	5.86822	0	0	Null_Model_OpenChrom	human
ReMap_ChIP	lcl_ramos	MYC	67261	273378	0.246037	7257.14	1344.69	44.6228	9.26826	0	0	Null_Model_OpenChrom	human
Cistrome_ChIP	GM12891	YY1	140347	273378	0.513381	28071.9	2516.13	44.6221	4.99955	0	0	Null_Model_OpenChrom	human
TxnFactorChIPV3	GM12878	TCF3	107702	273378	0.393967	17059.3	2031.35	44.622	6.31338	0	0	Null_Model_OpenChrom	human
Cistrome_ChIP	CUTLL1	NOTCH1	105891	273378	0.387343	17123.3	1989.41	44.6201	6.18402	0	0	Null_Model_OpenChrom	human
Cistrome_ChIP	KOPT-K1	BRD4	140846	273378	0.515206	29730.2	2490.31	44.6193	4.73747	0	0	Null_Model_OpenChrom	human
Cistrome_ChIP	GM12878	STAT5A	173679	273378	0.635307	42248.8	2945.65	44.6184	4.11087	0	0	Null_Model_OpenChrom	human
Cistrome_ChIP	CUTLL1	EP300	130084	273378	0.475839	26126.9	2329.95	44.6178	4.97893	0	0	Null_Model_OpenChrom	human
TxnFactorChIPV3	GM15510+TNFa	RELA	96318	273378	0.352325	14476.7	1834.3	44.6171	6.65329	0	0	Null_Model_OpenChrom	human
Cistrome_ChIP	GM10861	VDR	89775	273378	0.328391	12929.9	1722.32	44.6171	6.94319	0	0	Null_Model_OpenChrom	human
Cistrome_ChIP	GM12878	ELF1	156534	273378	0.572592	37647.5	2664.63	44.6165	4.15789	0	0	Null_Model_OpenChrom	human
Cistrome_ChIP	MM1.S+DMSO	BRD4	164619	273378	0.602166	39433.2	2805.85	44.616	4.17463	0	0	Null_Model_OpenChrom	human
TxnFactorChIPV3	GM10847	POLR2A	94314	273378	0.344995	14576.6	1787.2	44.6159	6.47024	0	0	Null_Model_OpenChrom	human
Cistrome_ChIP	DND-41_Persisters	BRD4	112401	273378	0.411156	20020.1	2070.6	44.6155	5.6144	0	0	Null_Model_OpenChrom	human
Cistrome_ChIP	CD3+	SPI1	137870	273378	0.50432	29867.3	2420.75	44.6154	4.61608	0	0	Null_Model_OpenChrom	human
Cistrome_ChIP	GM12878	IRF4	164405	273378	0.601383	39605.3	2797.24	44.6153	4.15109	0	0	Null_Model_OpenChrom	human
TxnFactorChIPV3	GM12878	YY1	141703	273378	0.518341	30062	2502.33	44.6148	4.7137	0	0	Null_Model_OpenChrom	human
TxnFactorChIPV3	GM12878	RUNX3	184182	273378	0.673726	47728	3058.52	44.6145	3.85899	0	0	Null_Model_OpenChrom	human
Cistrome_ChIP	KOPT-K1_Persisters	BRD4	132492	273378	0.484648	27739.1	2348	44.6136	4.77636	0	0	Null_Model_OpenChrom	human
Pazar_Chip	HPC	GABPA	100918	273378	0.369152	15975.3	1903.97	44.6134	6.31711	0	0	Null_Model_OpenChrom	human
Pazar_Chip	Jurkat	CREBBP	126635	273378	0.463223	26115.8	2253.13	44.6132	4.84899	0	0	Null_Model_OpenChrom	human
Cistrome_ChIP	CUTLL1	BRD4	142179	273378	0.520082	30701.8	2498.75	44.6132	4.63097	0	0	Null_Model_OpenChrom	human
TxnFactorChIPV3	GM12878	EGR1	109018	273378	0.398781	18814.8	2021.91	44.6128	5.79426	0	0	Null_Model_OpenChrom	human
TxnFactorChIPV3	GM12878	SIN3A	88023	273378	0.321983	12575.9	1691.17	44.6124	6.99935	0	0	Null_Model_OpenChrom	human
Misc_ChIP	MutuIII	EBNA2	116156	273378	0.424892	21571.7	2120.13	44.6124	5.38465	0	0	Null_Model_OpenChrom	EBV
Cistrome_ChIP	T_Lymphocyte	EP300	130084	273378	0.475839	26127.6	2330.23	44.612	4.97879	0	0	Null_Model_OpenChrom	human
TxnFactorChIPV3	GM12892	YY1	104791	273378	0.383319	17497.3	1956.76	44.6113	5.98898	0	0	Null_Model_OpenChrom	human
Cistrome_ChIP	Raji	PAX5	75596	273378	0.276526	9977	1470.95	44.6099	7.57703	0	0	Null_Model_OpenChrom	human
TxnFactorChIPV3	K562	TAF1	99667	273378	0.364576	16951.1	1854.24	44.6092	5.87969	0	0	Null_Model_OpenChrom	human
TxnFactorChIPV3	GM12891	POU2F2	94308	273378	0.344973	14950.5	1778.96	44.609	6.308	0	0	Null_Model_OpenChrom	human
Cistrome_ChIP	GM19099	RELA	100023	273378	0.365878	16427.7	1873.96	44.609	6.08868	0	0	Null_Model_OpenChrom	human
ReMap_ChIP	lclgm12878	NFKB1	115550	273378	0.422675	21456.4	2109.3	44.6089	5.38535	0	0	Null_Model_OpenChrom	human
TxnFactorChIPV3	GM12878	TBL1XR1	88609	273378	0.324126	14047.7	1671.47	44.6082	6.30773	0	0	Null_Model_OpenChrom	human
ReMap_ChIP	lclgm12892	NFKB1	107569	273378	0.393481	19443.7	1975.55	44.6081	5.53234	0	0	Null_Model_OpenChrom	human
TxnFactorChIPV3	K562	KDM5B	97691	273378	0.357348	16606.4	1817.72	44.6079	5.88273	0	0	Null_Model_OpenChrom	human
TxnFactorChIPV3	GM12891	YY1	98399	273378	0.359938	15996.4	1847.26	44.6079	6.15133	0	0	Null_Model_OpenChrom	human
Cistrome_ChIP	CD4+	YY1	83091	273378	0.303942	12506.2	1582.34	44.6078	6.644	0	0	Null_Model_OpenChrom	human
Cistrome_ChIP	GM12878	NFATC1	149130	273378	0.545508	34871.2	2561.45	44.607	4.2766	0	0	Null_Model_OpenChrom	human
TxnFactorChIPV3	NB4	POLR2A	111510	273378	0.407897	20633	2037.29	44.6069	5.40446	0	0	Null_Model_OpenChrom	human
Cistrome_ChIP	CD4+	KAT5	77429	273378	0.283231	11466.6	1478.76	44.6065	6.75258	0	0	Null_Model_OpenChrom	human
Cistrome_ChIP	GM15510	RELA	73516	273378	0.268917	10079	1422.15	44.6063	7.29398	0	0	Null_Model_OpenChrom	human
TxnFactorChIPV3	GM12891+TNFa	RELA	125535	273378	0.459199	25731	2237.45	44.6061	4.87875	0	0	Null_Model_OpenChrom	human
TxnFactorChIPV3	K562	PHF8	111805	273378	0.408976	21049.6	2034.62	44.6057	5.31151	0	0	Null_Model_OpenChrom	human
ReMap_ChIP	plasma_dmso	BRD4	95389	273378	0.348927	15952.9	1780.85	44.6056	5.97941	0	0	Null_Model_OpenChrom	human
Cistrome_ChIP	MM1.S	BRD3	105730	273378	0.386754	18647.6	1952.28	44.6056	5.66989	0	0	Null_Model_OpenChrom	human
ReMap_ChIP	hct116	TAF3	85937	273378	0.314352	13149	1631.87	44.6042	6.53565	0	0	Null_Model_OpenChrom	human
TxnFactorChIPV3	K562+IFNg6h	IRF1	89485	273378	0.327331	15283.1	1663.6	44.6032	5.85517	0	0	Null_Model_OpenChrom	human
Cistrome_ChIP	HPB-ALL	NOTCH1	165308	273378	0.604687	44191.9	2715.44	44.6028	3.74068	0	0	Null_Model_OpenChrom	human
Cistrome_ChIP	GM12878	ETS1	70682	273378	0.25855	9376.98	1374.48	44.6023	7.53782	0	0	Null_Model_OpenChrom	human
Cistrome_ChIP	GM12891	PAX5	96015	273378	0.351217	16261.2	1788.11	44.6022	5.90453	0	0	Null_Model_OpenChrom	human
Cistrome_ChIP	T_Lymphocyte	YY1	83091	273378	0.303942	12502.9	1582.63	44.6018	6.64573	0	0	Null_Model_OpenChrom	human
ReMap_ChIP	293t	PHF8	86973	273378	0.318142	13340.8	1650.89	44.6015	6.51934	0	0	Null_Model_OpenChrom	human
TxnFactorChIPV3	GM12878	BHLHE40	90292	273378	0.330283	14908.8	1690.21	44.5999	6.05628	0	0	Null_Model_OpenChrom	human
TxnFactorChIPV3	PBDE	POLR2A	98758	273378	0.361251	17638	1818.87	44.5991	5.59917	0	0	Null_Model_OpenChrom	human
Cistrome_ChIP	GM12892	YY1	108686	273378	0.397567	19715.8	1994.94	44.5978	5.51264	0	0	Null_Model_OpenChrom	human
Cistrome_ChIP	GM12892	PAX5	115040	273378	0.420809	23019.8	2063.34	44.5976	4.99743	0	0	Null_Model_OpenChrom	human
TxnFactorChIPV3	GM12878	GABPA	65388	273378	0.239185	8594.98	1273.47	44.597	7.6077	0	0	Null_Model_OpenChrom	human
Cistrome_ChIP	CD56+	SPI1	171126	273378	0.625968	51360.9	2685.5	44.597	3.33184	0	0	Null_Model_OpenChrom	human
TxnFactorChIPV3	K562	TBP	98322	273378	0.359656	18202.5	1796.53	44.5969	5.40157	0	0	Null_Model_OpenChrom	human
Cistrome_ChIP	K562	YY1	116596	273378	0.426501	24221.1	2071.34	44.5967	4.81382	0	0	Null_Model_OpenChrom	human
TxnFactorChIPV3	GM12878	FOXM1	104845	273378	0.383517	20205.6	1897.92	44.5958	5.1889	0	0	Null_Model_OpenChrom	human
TxnFactorChIPV3	K562+IFNg30	POLR2A	102732	273378	0.375787	19752.6	1860.76	44.5944	5.20094	0	0	Null_Model_OpenChrom	human
TxnFactorChIPV3	GM12892	PAX5	82770	273378	0.302768	13075.2	1562.88	44.5939	6.33031	0	0	Null_Model_OpenChrom	human
TxnFactorChIPV3	K562+IFNg6h	POLR2A	104514	273378	0.382306	19957	1896.19	44.5932	5.23697	0	0	Null_Model_OpenChrom	human
TxnFactorChIPV3	K562+IFNa6h	POLR2A	93621	273378	0.34246	16939.6	1719.59	44.5928	5.52677	0	0	Null_Model_OpenChrom	human
Misc_ChIP	GM12878	RelA	99138	273378	0.362641	18821.7	1801.15	44.5917	5.26721	0	0	Null_Model_OpenChrom	human
Pazar_Chip	HeLa	PHF8	101910	273378	0.372781	19549.2	1847.01	44.5915	5.213	0	0	Null_Model_OpenChrom	human
TxnFactorChIPV3	GM12878	EP300	90373	273378	0.330579	16430.2	1658.23	44.5913	5.50041	0	0	Null_Model_OpenChrom	human
TxnFactorChIPV3	K562	SAP30	75036	273378	0.274477	11480.6	1425.31	44.5906	6.53589	0	0	Null_Model_OpenChrom	human
TxnFactorChIPV3	K562+IFNa30	POLR2A	95371	273378	0.348861	17405.1	1748.53	44.5894	5.47949	0	0	Null_Model_OpenChrom	human
Pazar_Chip	HeLa+G1	PHF8	73246	273378	0.267929	11284.8	1389.64	44.5881	6.49067	0	0	Null_Model_OpenChrom	human
Cistrome_ChIP	HaematopoieticProgenitorCell	GABPA	60251	273378	0.220394	7813.6	1176.05	44.5878	7.71105	0	0	Null_Model_OpenChrom	human
TxnFactorChIPV3	HepG2	TAF1	101518	273378	0.371347	19255	1844.97	44.5877	5.27229	0	0	Null_Model_OpenChrom	human
TxnFactorChIPV3	NB4	MYC	116286	273378	0.425367	26139.6	2021.84	44.5864	4.44866	0	0	Null_Model_OpenChrom	human
TxnFactorChIPV3	GM12878	WRNIP1	81618	273378	0.298554	14084.3	1514.68	44.5862	5.79495	0	0	Null_Model_OpenChrom	human
TxnFactorChIPV3	K562	SIN3AK20	84197	273378	0.307987	14365.2	1566.22	44.5861	5.86119	0	0	Null_Model_OpenChrom	human
Misc_ChIP	IB4	EBNALP	59039	273378	0.215961	7984.17	1145.1	44.5854	7.39451	0	0	Null_Model_OpenChrom	EBV
Cistrome_ChIP	GM12892	RELA	78008	273378	0.285348	12874.1	1460.91	44.5846	6.0593	0	0	Null_Model_OpenChrom	human
TxnFactorChIPV3	GM12878	ATF2	99930	273378	0.365538	19586.3	1802.06	44.5844	5.10205	0	0	Null_Model_OpenChrom	human
TxnFactorChIPV3	GM18951+TNFa	RELA	81783	273378	0.299157	13989.3	1520.59	44.5838	5.84611	0	0	Null_Model_OpenChrom	human
TxnFactorChIPV3	SK-N-SH	TAF1	91179	273378	0.333527	16995.3	1663.92	44.5837	5.36495	0	0	Null_Model_OpenChrom	human
Cistrome_ChIP	CD8+	SPI1	156339	273378	0.571878	45519.4	2485.67	44.5834	3.43456	0	0	Null_Model_OpenChrom	human
TxnFactorChIPV3	K562	RBBP5	88131	273378	0.322378	15973.4	1618.54	44.5819	5.51736	0	0	Null_Model_OpenChrom	human
Misc_ChIP	GM12878	p50	113873	273378	0.41654	25110.9	1991	44.5817	4.5348	0	0	Null_Model_OpenChrom	human
ReMap_ChIP	hela	PHF8	108652	273378	0.397442	22745.6	1926.95	44.5815	4.77683	0	0	Null_Model_OpenChrom	human
Cistrome_ChIP	LoVo	NFYC	61394	273378	0.224575	8680.55	1182.42	44.5808	7.07259	0	0	Null_Model_OpenChrom	human
TxnFactorChIPV3	HepG2	GABPA	76640	273378	0.280344	12761.6	1432.87	44.5806	6.00552	0	0	Null_Model_OpenChrom	human
TxnFactorChIPV3	GM12878	NFIC	102207	273378	0.373867	21374.9	1813.17	44.5806	4.78164	0	0	Null_Model_OpenChrom	human
TxnFactorChIPV3	HEK293	POLR2A	91992	273378	0.336501	17178	1678.18	44.5804	5.35522	0	0	Null_Model_OpenChrom	human
Pazar_Chip	H1	TAF1	87896	273378	0.321518	16342.2	1605.05	44.5803	5.37846	0	0	Null_Model_OpenChrom	human
TxnFactorChIPV3	K562	MYC	113312	273378	0.414488	25787.9	1963.3	44.5801	4.394	0	0	Null_Model_OpenChrom	human
ReMap_ChIP	lclgm12891	NFKB1	110140	273378	0.402885	24380.5	1923.74	44.5796	4.51755	0	0	Null_Model_OpenChrom	human
Misc_ChIP	GM12878	RelB	111895	273378	0.409305	24102	1969.4	44.5785	4.64256	0	0	Null_Model_OpenChrom	human
TxnFactorChIPV3	HeLa-S3	TAF1	91895	273378	0.336146	17602.4	1666.57	44.5782	5.2206	0	0	Null_Model_OpenChrom	human
Cistrome_ChIP	P493-6	MYC	56043	273378	0.205002	7208	1095.53	44.5767	7.77511	0	0	Null_Model_OpenChrom	human
Cistrome_ChIP	K562	NFYA	104890	273378	0.383681	23079.7	1835.27	44.5766	4.54468	0	0	Null_Model_OpenChrom	human
Cistrome_ChIP	GM12878	MYC	53469	273378	0.195586	6809.38	1046.73	44.5766	7.85225	0	0	Null_Model_OpenChrom	human
Cistrome_ChIP	A549	ETS1	87898	273378	0.321526	16388.9	1604.2	44.5763	5.36328	0	0	Null_Model_OpenChrom	human
TxnFactorChIPV3	MCF-7+serum_starved_media	POLR2A	105525	273378	0.386004	23084.7	1849.44	44.5759	4.57122	0	0	Null_Model_OpenChrom	human
ReMap_ChIP	mm1s_jq1_500nm	CDK9	110560	273378	0.404422	24692.6	1926.34	44.5754	4.47745	0	0	Null_Model_OpenChrom	human
Cistrome_ChIP	GM12878	EP300	57943	273378	0.211952	7916.66	1122.29	44.5753	7.31912	0	0	Null_Model_OpenChrom	human
Misc_ChIP	GM12878	BRD4	54653	273378	0.199917	7408.5	1059.89	44.5747	7.37707	0	0	Null_Model_OpenChrom	human
TxnFactorChIPV3	GM12878	SPI1	120347	273378	0.440222	30023.6	2026.36	44.5743	4.00842	0	0	Null_Model_OpenChrom	human
TxnFactorChIPV3	GM12891	SPI1	128082	273378	0.468516	32933.9	2134.61	44.574	3.88906	0	0	Null_Model_OpenChrom	human
TxnFactorChIPV3	GM12878	CHD1	58279	273378	0.213181	7993.3	1128.14	44.574	7.29098	0	0	Null_Model_OpenChrom	human
TxnFactorChIPV3	K562	YY1	109808	273378	0.401671	24393	1916.26	44.5739	4.50162	0	0	Null_Model_OpenChrom	human
ReMap_ChIP	uae_leukemic	FLI1	123204	273378	0.450673	30924.2	2070.27	44.5739	3.98407	0	0	Null_Model_OpenChrom	human
Cistrome_ChIP	HEK293T	BRD4	103950	273378	0.380243	22333.5	1831.04	44.5738	4.65444	0	0	Null_Model_OpenChrom	human
Cistrome_ChIP	GM12891	RELA	104389	273378	0.381849	21974	1848.96	44.5737	4.75058	0	0	Null_Model_OpenChrom	human
Cistrome_ChIP	K562	MYC	110335	273378	0.403599	24772.4	1919.58	44.5735	4.45396	0	0	Null_Model_OpenChrom	human
Cistrome_ChIP	GM12891	SPI1	121998	273378	0.446261	31607	2027.92	44.5732	3.85984	0	0	Null_Model_OpenChrom	human
TxnFactorChIPV3	NB4	MAX	124259	273378	0.454532	31829.7	2073.66	44.5731	3.90387	0	0	Null_Model_OpenChrom	human
ReMap_ChIP	p493_6_1hr	MAX	53838	273378	0.196936	7246.15	1045.3	44.5727	7.42988	0	0	Null_Model_OpenChrom	human
Cistrome_ChIP	LoVo	RELA	88629	273378	0.324199	16960.2	1607.92	44.5725	5.22572	0	0	Null_Model_OpenChrom	human
TxnFactorChIPV3	Gliobla	POLR2A	104210	273378	0.381194	22500.1	1833.19	44.5724	4.63154	0	0	Null_Model_OpenChrom	human
TxnFactorChIPV3	ProgFib	POLR2A	99833	273378	0.365183	20913.2	1770.61	44.5722	4.77367	0	0	Null_Model_OpenChrom	human
TxnFactorChIPV3	HepG2	MXI1	102809	273378	0.376069	22233.5	1807.76	44.5719	4.62405	0	0	Null_Model_OpenChrom	human
Cistrome_ChIP	LoVo	NFAT5	71424	273378	0.261265	11629.1	1341.55	44.5716	6.14181	0	0	Null_Model_OpenChrom	human
Cistrome_ChIP	GM06993	TP53	113583	273378	0.41548	25902.8	1967.18	44.5716	4.38497	0	0	Null_Model_OpenChrom	human
TxnFactorChIPV3	GM12878	MTA3	72631	273378	0.26568	11771.3	1365.45	44.5712	6.17016	0	0	Null_Model_OpenChrom	human
TxnFactorChIPV3	ECC-1+DMSO_0.02pct	POLR2A	109122	273378	0.399162	24788.9	1892.12	44.5707	4.40205	0	0	Null_Model_OpenChrom	human
TxnFactorChIPV3	H1-hESC	TAF1	104911	273378	0.383758	22329.6	1852.83	44.5705	4.69829	0	0	Null_Model_OpenChrom	human
Cistrome_ChIP	CD34+	POLR2A	113859	273378	0.416489	26042.8	1970.28	44.5705	4.37199	0	0	Null_Model_OpenChrom	human
TxnFactorChIPV3	HepG2	YY1	96816	273378	0.354147	20532.7	1711.53	44.5701	4.71521	0	0	Null_Model_OpenChrom	human
Cistrome_ChIP	CD4+	CREBBP	52833	273378	0.19326	6759.94	1033.73	44.5699	7.8156	0	0	Null_Model_OpenChrom	human
Misc_ChIP	LoVo	H3K4me3	108283	273378	0.396093	24263	1885.14	44.5697	4.46289	0	0	Null_Model_OpenChrom	human
ReMap_ChIP	hpc	GABPA	53173	273378	0.194504	6645.65	1043.92	44.5696	8.00118	0	0	Null_Model_OpenChrom	human
TxnFactorChIPV3	HepG2	SIN3AK20	91596	273378	0.335053	18102.2	1648.97	44.5695	5.05994	0	0	Null_Model_OpenChrom	human
TxnFactorChIPV3	GM12878	NRF1	55662	273378	0.203608	7724.26	1075.6	44.5686	7.20612	0	0	Null_Model_OpenChrom	human
TxnFactorChIPV3	MCF10A-Er-Src+4OHTAM_1uM_36hr	POLR2A	104615	273378	0.382675	22638.4	1839.35	44.5683	4.62112	0	0	Null_Model_OpenChrom	human
Cistrome_ChIP	MCF-7	PML	72044	273378	0.263533	11582.6	1356.62	44.5675	6.22003	0	0	Null_Model_OpenChrom	human
TxnFactorChIPV3	MCF-7	POLR2A	96463	273378	0.352856	20052.5	1714.52	44.5668	4.81052	0	0	Null_Model_OpenChrom	human
TxnFactorChIPV3	K562+IFNg6h	MYC	95425	273378	0.349059	19823.8	1696.37	44.5665	4.81366	0	0	Null_Model_OpenChrom	human
TxnFactorChIPV3	H1-hESC	TBP	94208	273378	0.344607	19975.5	1665.66	44.5665	4.71617	0	0	Null_Model_OpenChrom	human
Cistrome_ChIP	A549	ELF1	84303	273378	0.308375	15490	1544.06	44.5664	5.44242	0	0	Null_Model_OpenChrom	human
Cistrome_ChIP	ME-1	ELF1	106782	273378	0.390602	24784.4	1839.91	44.5661	4.30843	0	0	Null_Model_OpenChrom	human
Cistrome_ChIP	ME-1	EP300	163223	273378	0.59706	53131	2470.32	44.5659	3.07209	0	0	Null_Model_OpenChrom	human
TxnFactorChIPV3	A549	POLR2A	105137	273378	0.384585	23918.1	1822.46	44.5656	4.3957	0	0	Null_Model_OpenChrom	human
Cistrome_ChIP	MCF-7	GABPA	82739	273378	0.302654	16291.5	1491	44.5656	5.07866	0	0	Null_Model_OpenChrom	human
TxnFactorChIPV3	K562+IFNg30	MYC	116867	273378	0.427492	29500.9	1960.46	44.5641	3.96147	0	0	Null_Model_OpenChrom	human
ReMap_ChIP	hpball	NOTCH1	79035	273378	0.289105	14409.7	1450.17	44.5641	5.48483	0	0	Null_Model_OpenChrom	human
TxnFactorChIPV3	MCF-7+serum_stimulated_media	POLR2A	106114	273378	0.388159	23908.2	1844.67	44.564	4.43839	0	0	Null_Model_OpenChrom	human
TxnFactorChIPV3	MCF10A-Er-Src+EtOH_0.01pct	POLR2A	106042	273378	0.387895	24169.1	1837.21	44.5638	4.3875	0	0	Null_Model_OpenChrom	human
Cistrome_ChIP	K562	PML	111918	273378	0.409389	26536.5	1915.95	44.5636	4.21751	0	0	Null_Model_OpenChrom	human
ReMap_ChIP	mm1s_dmso	MYC	74996	273378	0.274331	13745.5	1374.49	44.5623	5.45605	0	0	Null_Model_OpenChrom	human
TxnFactorChIPV3	GM10847+TNFa	RELA	65208	273378	0.238527	10080.9	1237.09	44.5621	6.46846	0	0	Null_Model_OpenChrom	human
ReMap_ChIP	esc	TAF2	89933	273378	0.328969	18581.5	1601.18	44.562	4.83993	0	0	Null_Model_OpenChrom	human
Cistrome_ChIP	HEK293T	MYC	108275	273378	0.396063	25103.9	1866.42	44.5619	4.31307	0	0	Null_Model_OpenChrom	human
TxnFactorChIPV3	GM12878	SRF	62600	273378	0.228987	9446.22	1192.82	44.5616	6.62699	0	0	Null_Model_OpenChrom	human
TxnFactorChIPV3	K562	HMGN3	87899	273378	0.321529	17639.3	1576.69	44.5615	4.98313	0	0	Null_Model_OpenChrom	human
TxnFactorChIPV3	K562	GABPA	84286	273378	0.308313	16099	1530.2	44.5607	5.23547	0	0	Null_Model_OpenChrom	human
Cistrome_ChIP	SK-N-SH	GABPA	60709	273378	0.22207	9470.96	1149.85	44.5605	6.41001	0	0	Null_Model_OpenChrom	human
TxnFactorChIPV3	K562+IFNg30	IRF1	65212	273378	0.238542	10877.4	1219.36	44.5598	5.99521	0	0	Null_Model_OpenChrom	human
TxnFactorChIPV3	HepG2+forskolin	POLR2A	107021	273378	0.391476	24588.1	1849.94	44.5597	4.35256	0	0	Null_Model_OpenChrom	human
TxnFactorChIPV3	A549+EtOH_0.02pct	TAF1	70514	273378	0.257936	11769.6	1318.33	44.5597	5.9912	0	0	Null_Model_OpenChrom	human
Cistrome_ChIP	HeLa-S3	GABPA	63544	273378	0.23244	10327.7	1194.27	44.5597	6.15276	0	0	Null_Model_OpenChrom	human
Cistrome_ChIP	K562	GABPA	86754	273378	0.317341	17261.1	1559.57	44.5591	5.02598	0	0	Null_Model_OpenChrom	human
Cistrome_ChIP	HepG2	ELF1	118320	273378	0.432807	30204.1	1977.51	44.559	3.91734	0	0	Null_Model_OpenChrom	human
TxnFactorChIPV3	GM12878+TNFa	RELA	79252	273378	0.289899	15238.2	1436.61	44.5589	5.20086	0	0	Null_Model_OpenChrom	human
Misc_ChIP	LoVo	RFX1	101598	273378	0.371639	23220.2	1758.98	44.5586	4.37541	0	0	Null_Model_OpenChrom	human
Cistrome_ChIP	U937	FLI1	110953	273378	0.405859	26945.2	1885.33	44.5586	4.11773	0	0	Null_Model_OpenChrom	human
TxnFactorChIPV3	HeLa-S3	CHD2	99831	273378	0.365176	22561.2	1734.15	44.5578	4.4249	0	0	Null_Model_OpenChrom	human
Cistrome_ChIP	MDA-MB-453	MYC	100526	273378	0.367718	22285.2	1755.94	44.5578	4.51089	0	0	Null_Model_OpenChrom	human
TxnFactorChIPV3	MCF10A-Er-Src+4OHTAM_1uM_36hr	E2F4	86085	273378	0.314894	17446	1540.48	44.5569	4.93437	0	0	Null_Model_OpenChrom	human
Cistrome_ChIP	GM10855	VDR	51206	273378	0.187308	6973.88	992.716	44.5567	7.34254	0	0	Null_Model_OpenChrom	human
ReMap_ChIP	skno1_leukemic	RUNX1	137325	273378	0.502326	39584	2193.64	44.5565	3.46921	0	0	Null_Model_OpenChrom	human
TxnFactorChIPV3	GM12878	SIX5	45217	273378	0.165401	5767.62	885.385	44.5562	7.8398	0	0	Null_Model_OpenChrom	human
Pazar_Chip	IMR90_Senescent	P130	85432	273378	0.312505	16991.9	1536.04	44.5562	5.02781	0	0	Null_Model_OpenChrom	human
Cistrome_ChIP	CD4+	HDAC6	58087	273378	0.212479	9021.14	1101.22	44.556	6.43899	0	0	Null_Model_OpenChrom	human
Cistrome_ChIP	U87	MYC	101037	273378	0.369587	23507.6	1740.05	44.5559	4.29806	0	0	Null_Model_OpenChrom	human
TxnFactorChIPV3	A549+DEX_100nM	CREB1	91991	273378	0.336497	18888.1	1640.71	44.5555	4.87031	0	0	Null_Model_OpenChrom	human
Cistrome_ChIP	HepG2	GABPA	55465	273378	0.202888	8214.44	1060.49	44.5555	6.75214	0	0	Null_Model_OpenChrom	human
Pazar_Chip	HeLa+G1S	PHF8	95955	273378	0.350998	21427.4	1672.7	44.5552	4.47814	0	0	Null_Model_OpenChrom	human
TxnFactorChIPV3	HeLa-S3	POLR2A	115813	273378	0.423637	30243.4	1920.54	44.555	3.82936	0	0	Null_Model_OpenChrom	human
TxnFactorChIPV3	K562	CHD1	66434	273378	0.243012	10732.8	1250.18	44.5546	6.1898	0	0	Null_Model_OpenChrom	human
Cistrome_ChIP	GM12878	GABPA	45376	273378	0.165983	5520.95	894.542	44.5536	8.21888	0	0	Null_Model_OpenChrom	human
Misc_ChIP	LoVo	YY1	67822	273378	0.248089	11874.4	1255.74	44.5534	5.7116	0	0	Null_Model_OpenChrom	human
TxnFactorChIPV3	HepG2	TBP	80728	273378	0.295298	15264.8	1469.33	44.5532	5.28851	0	0	Null_Model_OpenChrom	human
Cistrome_ChIP	DND-41	BRD4	57900	273378	0.211795	8724.17	1103.76	44.553	6.63673	0	0	Null_Model_OpenChrom	human
ReMap_ChIP	mm1s_dmso	CDK9	78372	273378	0.28668	15186.9	1418.22	44.5525	5.16051	0	0	Null_Model_OpenChrom	human
Pazar_Chip	IMR90_Senescent	RB2	79393	273378	0.290415	15137.7	1442.24	44.5525	5.24471	0	0	Null_Model_OpenChrom	human
ReMap_ChIP	sem	RUNX1	159297	273378	0.582699	51855.2	2411.6	44.5521	3.07196	0	0	Null_Model_OpenChrom	human
Misc_ChIP	LoVo	NFAT5	106507	273378	0.389596	26921.4	1786.35	44.5521	3.95621	0	0	Null_Model_OpenChrom	human
TxnFactorChIPV3	K562	PML	80005	273378	0.292653	15495.5	1447.96	44.5519	5.1631	0	0	Null_Model_OpenChrom	human
ReMap_ChIP	uae_leukemic_5hrzinc	FLI1	125989	273378	0.46086	33652.8	2072.57	44.5516	3.74379	0	0	Null_Model_OpenChrom	human
Cistrome_ChIP	HepG2	YY1	113028	273378	0.41345	28867.1	1889.07	44.5516	3.91547	0	0	Null_Model_OpenChrom	human
ReMap_ChIP	blood_monocyte	SPI1	129599	273378	0.474065	36598.7	2087.5	44.551	3.54108	0	0	Null_Model_OpenChrom	human
TxnFactorChIPV3	K562	POLR2A	126764	273378	0.463695	34164.3	2078.51	44.5509	3.71042	0	0	Null_Model_OpenChrom	human
TxnFactorChIPV3	A549+EtOH_0.02pct	POLR2A	114472	273378	0.418732	29255.2	1912.8	44.5509	3.91288	0	0	Null_Model_OpenChrom	human
Misc_ChIP	LoVo	GMEB2	108395	273378	0.396502	25954.7	1850.47	44.5509	4.17631	0	0	Null_Model_OpenChrom	human
TxnFactorChIPV3	HepG2	POLR2A	115635	273378	0.422986	29960.9	1923.07	44.5508	3.85953	0	0	Null_Model_OpenChrom	human
TxnFactorChIPV3	GM12878	BCLAF1	51102	273378	0.186928	7233	984.701	44.5506	7.06512	0	0	Null_Model_OpenChrom	human
TxnFactorChIPV3	HCT-116	POLR2A	118742	273378	0.434351	31796.6	1951.64	44.55	3.73443	0	0	Null_Model_OpenChrom	human
Pazar_Chip	IMR90_Quiescent	P130	79393	273378	0.290415	15140.4	1442.27	44.5497	5.24378	0	0	Null_Model_OpenChrom	human
Artem-ChIP	CD4+_T_cells+invitrogen	POLR2A	168131	273378	0.615013	56531.4	2505.07	44.5496	2.97412	0	0	Null_Model_OpenChrom	human
TxnFactorChIPV3	K562	MAZ	124638	273378	0.455918	33857	2037.78	44.549	3.68131	0	0	Null_Model_OpenChrom	human
TxnFactorChIPV3	GM12878	NFYB	67318	273378	0.246245	12340.1	1234.1	44.5489	5.45523	0	0	Null_Model_OpenChrom	human
TxnFactorChIPV3	GM12878	USF2	60338	273378	0.220713	9893.69	1132.34	44.5487	6.09864	0	0	Null_Model_OpenChrom	human
TxnFactorChIPV3	GM12878	ETS1	44304	273378	0.162061	5469.76	871.727	44.5486	8.09981	0	0	Null_Model_OpenChrom	human
Misc_ChIP	LoVo	SOX2	90477	273378	0.330959	20186	1577.89	44.5475	4.48216	0	0	Null_Model_OpenChrom	human
Cistrome_ChIP	LoVo	STAT2	59946	273378	0.219279	9653.26	1128.97	44.5474	6.20992	0	0	Null_Model_OpenChrom	human
Pazar_Chip	IMR90_shRbSenescent	P130	88959	273378	0.325407	18521.7	1581.18	44.5473	4.80296	0	0	Null_Model_OpenChrom	human
TxnFactorChIPV3	H1-hESC	POLR2A	106203	273378	0.388484	26685.2	1785.03	44.547	3.97984	0	0	Null_Model_OpenChrom	human
Cistrome_ChIP	GM12878	BATF	138393	273378	0.506233	41745.8	2169.58	44.5465	3.31513	0	0	Null_Model_OpenChrom	human
TxnFactorChIPV3	HeLa-S3	GABPA	55263	273378	0.202149	8524.24	1049.22	44.5463	6.48304	0	0	Null_Model_OpenChrom	human
ReMap_ChIP	u87	MYC	78838	273378	0.288385	15414.1	1423.8	44.5455	5.11466	0	0	Null_Model_OpenChrom	human
TxnFactorChIPV3	A549+DEX_100nM	POLR2A	114704	273378	0.41958	29557.9	1911.45	44.5453	3.88066	0	0	Null_Model_OpenChrom	human
Cistrome_ChIP	ECC-1	YY1	99100	273378	0.362502	23231.7	1703.19	44.5449	4.26573	0	0	Null_Model_OpenChrom	human
Artem-ChIP	Naive_CD4_Tcell_EI_5h_6	NFATC2	110736	273378	0.405066	29057	1833.66	44.5443	3.81099	0	0	Null_Model_OpenChrom	human
Cistrome_ChIP	A549	YY1	109152	273378	0.399271	28523.5	1810.1	44.5437	3.82674	0	0	Null_Model_OpenChrom	human
Cistrome_ChIP	CD14+	IRF1	122352	273378	0.447556	33486.9	1995.02	44.5435	3.65373	0	0	Null_Model_OpenChrom	human
TxnFactorChIPV3	K562	ZBTB7A	97414	273378	0.356334	23107.3	1668.22	44.5425	4.21573	0	0	Null_Model_OpenChrom	human
Cistrome_ChIP	EndothelialCell	MYC	108575	273378	0.397161	28598.1	1795.54	44.5421	3.79659	0	0	Null_Model_OpenChrom	human
Cistrome_ChIP	HeLa-S3	ELK4	51273	273378	0.187553	7398.11	985.029	44.5417	6.93055	0	0	Null_Model_OpenChrom	human
TxnFactorChIPV3	HeLa-S3	MAZ	82783	273378	0.302815	17130.1	1473.99	44.5408	4.83261	0	0	Null_Model_OpenChrom	human
TxnFactorChIPV3	GM12892+TNFa	RELA	57703	273378	0.211074	9152.5	1090.04	44.5402	6.30462	0	0	Null_Model_OpenChrom	human
Cistrome_ChIP	LoVo	IRF1	113942	273378	0.416793	29839.6	1888.25	44.5399	3.81848	0	0	Null_Model_OpenChrom	human
TxnFactorChIPV3	GM12878	USF1	65059	273378	0.237982	11360	1205.65	44.5393	5.72701	0	0	Null_Model_OpenChrom	human
Cistrome_ChIP	NB4	MAX	69657	273378	0.254801	13226.3	1266.99	44.5393	5.26654	0	0	Null_Model_OpenChrom	human
TxnFactorChIPV3	K562+IFNa6h	MYC	66629	273378	0.243725	12108.8	1224.1	44.5389	5.50253	0	0	Null_Model_OpenChrom	human
TxnFactorChIPV3	HeLa-S3	E2F1	70069	273378	0.256308	13841	1262.45	44.5389	5.06244	0	0	Null_Model_OpenChrom	human
TxnFactorChIPV3	H1-hESC	TAF7	68653	273378	0.251128	12632	1257.81	44.5386	5.43484	0	0	Null_Model_OpenChrom	human
TxnFactorChIPV3	MCF-7	E2F1	91049	273378	0.333052	20851.2	1576.12	44.5383	4.3666	0	0	Null_Model_OpenChrom	human
ReMap_ChIP	lclib4	RBPJ	112646	273378	0.412052	29459.4	1867.77	44.5379	3.82377	0	0	Null_Model_OpenChrom	human
Cistrome_ChIP	NB4	MYC	53324	273378	0.195056	8044.74	1016.65	44.5379	6.62843	0	0	Null_Model_OpenChrom	human
Cistrome_ChIP	K562	NFYB	72113	273378	0.263785	14180.9	1300.75	44.5376	5.08523	0	0	Null_Model_OpenChrom	human
Cistrome_ChIP	H1	SP4	110581	273378	0.404499	29540.6	1819.6	44.5375	3.74335	0	0	Null_Model_OpenChrom	human
Cistrome_ChIP	A549	GABPA	87135	273378	0.318734	19255	1524.12	44.5371	4.52532	0	0	Null_Model_OpenChrom	human
Cistrome_ChIP	U2OS	MYC	85117	273378	0.311353	19034.3	1483.86	44.5342	4.47176	0	0	Null_Model_OpenChrom	human
ReMap_ChIP	lclgm18951	NFKB1	54161	273378	0.198118	8162.03	1032.89	44.5341	6.63573	0	0	Null_Model_OpenChrom	human
Pazar_Chip	adipocyte	E2F4	50608	273378	0.185121	7728.08	962.862	44.5338	6.54859	0	0	Null_Model_OpenChrom	human
Cistrome_ChIP	LoVo	ETS2	91428	273378	0.334438	21235.2	1576.17	44.5337	4.3055	0	0	Null_Model_OpenChrom	human
TxnFactorChIPV3	IMR90	POLR2A	90868	273378	0.33239	20999.8	1568.89	44.5335	4.32709	0	0	Null_Model_OpenChrom	human
TxnFactorChIPV3	HeLa-S3	TBP	82901	273378	0.303247	18665	1442.44	44.5328	4.44153	0	0	Null_Model_OpenChrom	human
ReMap_ChIP	hela	DCP1A	116206	273378	0.425074	32078.3	1889.13	44.5325	3.62258	0	0	Null_Model_OpenChrom	human
TxnFactorChIPV3	HeLa-S3	MXI1	73036	273378	0.267161	14203.1	1321.14	44.532	5.14224	0	0	Null_Model_OpenChrom	human
TxnFactorChIPV3	K562	SP1	55364	273378	0.202518	8891.14	1043.59	44.5318	6.22687	0	0	Null_Model_OpenChrom	human
TxnFactorChIPV3	K562	CHD2	57605	273378	0.210716	9275.74	1085.3	44.5307	6.21028	0	0	Null_Model_OpenChrom	human
TxnFactorChIPV3	MCF-7+serum_stimulated_media	MYC	96417	273378	0.352687	23324.5	1641.44	44.5294	4.13371	0	0	Null_Model_OpenChrom	human
ReMap_ChIP	huvec_vegf0hr	ETS1	92352	273378	0.337818	21733.1	1585.91	44.5291	4.24937	0	0	Null_Model_OpenChrom	human
TxnFactorChIPV3	SK-N-SH_RA	YY1	80120	273378	0.293074	17127.2	1414.65	44.5289	4.67795	0	0	Null_Model_OpenChrom	human
TxnFactorChIPV3	H1-hESC	SIN3A	95842	273378	0.350584	23746.2	1619.11	44.5281	4.0361	0	0	Null_Model_OpenChrom	human
TxnFactorChIPV3	K562	NRF1	41214	273378	0.150758	5515.13	801.737	44.5269	7.47289	0	0	Null_Model_OpenChrom	human
TxnFactorChIPV3	HeLa-S3	ELK4	48952	273378	0.179063	7244.27	936.697	44.5264	6.75734	0	0	Null_Model_OpenChrom	human
Cistrome_ChIP	OCI-Ly3	SPIB	77818	273378	0.284653	16783.6	1370.75	44.5263	4.63655	0	0	Null_Model_OpenChrom	human
Misc_ChIP	LoVo	ASCL2	83187	273378	0.304293	19213.2	1436.78	44.5259	4.32969	0	0	Null_Model_OpenChrom	human
TxnFactorChIPV3	GM12878	E2F4	37779	273378	0.138193	4664.15	743.722	44.5258	8.09986	0	0	Null_Model_OpenChrom	human
ReMap_ChIP	hela	E2F1	75753	273378	0.2771	15643.4	1350	44.5258	4.84248	0	0	Null_Model_OpenChrom	human
TxnFactorChIPV3	K562	MXI1	51919	273378	0.189917	8271.69	980.277	44.5255	6.27671	0	0	Null_Model_OpenChrom	human
Cistrome_ChIP	LoVo	MYC	97305	273378	0.355936	25167.6	1620.14	44.5255	3.86628	0	0	Null_Model_OpenChrom	human
TxnFactorChIPV3	GM12878	MYC	41195	273378	0.150689	5425.75	803.36	44.5245	7.5925	0	0	Null_Model_OpenChrom	human
ReMap_ChIP	cutll	NOTCH1	61068	273378	0.223383	10838.7	1128.13	44.5244	5.63425	0	0	Null_Model_OpenChrom	human
Cistrome_ChIP	HaematopoieticProgenitorCell	FLI1	91494	273378	0.334679	21855.9	1564.05	44.5243	4.18624	0	0	Null_Model_OpenChrom	human
TxnFactorChIPV3	HCT-116	YY1	74773	273378	0.273515	14832.9	1346.24	44.524	5.04103	0	0	Null_Model_OpenChrom	human
Cistrome_ChIP	MM1.S	BRD2	37092	273378	0.13568	4280.61	736.959	44.5227	8.66511	0	0	Null_Model_OpenChrom	human
TxnFactorChIPV3	GM12878	PBX3	57681	273378	0.210994	10236.7	1065.63	44.5224	5.63472	0	0	Null_Model_OpenChrom	human
TxnFactorChIPV3	U87	POLR2A	97942	273378	0.358266	24923.5	1640.05	44.522	3.9297	0	0	Null_Model_OpenChrom	human
TxnFactorChIPV3	GM12878	IRF4	72380	273378	0.264762	14988.5	1289.07	44.5217	4.82903	0	0	Null_Model_OpenChrom	human
ReMap_ChIP	mm1s_jq1_500nm	MBD4	78031	273378	0.285433	17642.4	1356.4	44.5212	4.42291	0	0	Null_Model_OpenChrom	human
ReMap_ChIP	huvec_vegf4hr	ETS1	119289	273378	0.436352	35163.8	1889.57	44.5209	3.39238	0	0	Null_Model_OpenChrom	human
Cistrome_ChIP	ME-1	SPI1	71014	273378	0.259765	14421.3	1271.17	44.52	4.92423	0	0	Null_Model_OpenChrom	human
Cistrome_ChIP	HCT-116	YY1	119582	273378	0.437424	35440.3	1889.99	44.5196	3.37418	0	0	Null_Model_OpenChrom	human
TxnFactorChIPV3	K562	EGR1	115878	273378	0.423875	33870.8	1842.08	44.5189	3.42118	0	0	Null_Model_OpenChrom	human
TxnFactorChIPV3	MCF-7+vehicle	MYC	106741	273378	0.390452	28943.2	1747.56	44.518	3.68795	0	0	Null_Model_OpenChrom	human
Cistrome_ChIP	EndothelialCell	ETS1	119541	273378	0.437274	35883.2	1879.2	44.5177	3.33139	0	0	Null_Model_OpenChrom	human
TxnFactorChIPV3	PFSK-1	FOXP2	88760	273378	0.324679	21226.7	1517.01	44.5175	4.18152	0	0	Null_Model_OpenChrom	human
TxnFactorChIPV3	K562+IFNa30	MYC	53546	273378	0.195868	9237.56	995.307	44.5174	5.79655	0	0	Null_Model_OpenChrom	human
ReMap_ChIP	huvec_vegf1hr	ETS1	90825	273378	0.332232	21830.6	1549.84	44.5171	4.16045	0	0	Null_Model_OpenChrom	human
TxnFactorChIPV3	HepG2	REST	74319	273378	0.271854	16123.9	1307.29	44.5158	4.60924	0	0	Null_Model_OpenChrom	human
TxnFactorChIPV3	GM18505+TNFa	RELA	54338	273378	0.198765	9031.35	1017.77	44.5155	6.0166	0	0	Null_Model_OpenChrom	human
ReMap_ChIP	k562	NFYA	86775	273378	0.317418	20714.6	1483.99	44.5155	4.18908	0	0	Null_Model_OpenChrom	human
ReMap_ChIP	tall_rpmi8402	TCF12	121758	273378	0.445383	38636.4	1867.27	44.5149	3.15138	0	0	Null_Model_OpenChrom	human
Cistrome_ChIP	Monocyte_CD14+	STAT1	104895	273378	0.383699	28794.9	1709.55	44.5148	3.64283	0	0	Null_Model_OpenChrom	human
Cistrome_ChIP	MCF-7	MYC	120394	273378	0.440394	35866	1898.87	44.5148	3.35678	0	0	Null_Model_OpenChrom	human
ReMap_ChIP	skno1_leukemic	ERG	118099	273378	0.431999	35512.7	1855.27	44.5144	3.32554	0	0	Null_Model_OpenChrom	human
Misc_ChIP	MutuIII	EBNA3C	40568	273378	0.148395	5700.67	783.296	44.5136	7.11635	0	0	Null_Model_OpenChrom	EBV
TxnFactorChIPV3	HepG2	MAZ	75890	273378	0.277601	15716.6	1351.82	44.5128	4.82864	0	0	Null_Model_OpenChrom	human
Misc_ChIP	LoVo	MNT	116225	273378	0.425144	34975.2	1825.31	44.5128	3.32307	0	0	Null_Model_OpenChrom	human
ReMap_ChIP	hsc	SMARCA4	103162	273378	0.37736	28701.8	1672.8	44.5124	3.59427	0	0	Null_Model_OpenChrom	human
Cistrome_ChIP	LoVo	YY1	33604	273378	0.122921	3988.79	665.328	44.5122	8.4246	0	0	Null_Model_OpenChrom	human
Cistrome_ChIP	VCaP	GABPA	38133	273378	0.139488	5021.15	743.901	44.5111	7.59447	0	0	Null_Model_OpenChrom	human
Cistrome_ChIP	HL-60	GABPA	39642	273378	0.145008	5346.17	770.506	44.5108	7.41503	0	0	Null_Model_OpenChrom	human
TxnFactorChIPV3	A549+EtOH_0.02pct	YY1	63115	273378	0.230871	12048.7	1147.28	44.5107	5.23833	0	0	Null_Model_OpenChrom	human
TxnFactorChIPV3	HUVEC	POLR2A	123436	273378	0.451521	38082.8	1917.6	44.5104	3.24125	0	0	Null_Model_OpenChrom	human
ReMap_ChIP	huvec_vegf12hr	ETS1	127936	273378	0.467982	40417.4	1966.29	44.5096	3.16537	0	0	Null_Model_OpenChrom	human
Cistrome_ChIP	CD14+	STAT1	104895	273378	0.383699	28793.1	1709.79	44.5095	3.64306	0	0	Null_Model_OpenChrom	human
Cistrome_ChIP	MCF-7	E2F1	106309	273378	0.388872	28682.9	1744.04	44.5094	3.70635	0	0	Null_Model_OpenChrom	human
Cistrome_ChIP	HepG2	MYC	54808	273378	0.200484	9531.85	1017.24	44.509	5.74998	0	0	Null_Model_OpenChrom	human
ReMap_ChIP	k562_leukemic_72hrdox	ERG	98988	273378	0.362092	26295.3	1633.22	44.5089	3.76448	0	0	Null_Model_OpenChrom	human
Pazar_Chip	IMR90_shRbQuiescent	P130	45385	273378	0.166016	7016.28	862.049	44.5088	6.46853	0	0	Null_Model_OpenChrom	human
Cistrome_ChIP	LoVo	NFYA	42570	273378	0.155718	6065.68	820.165	44.5085	7.01817	0	0	Null_Model_OpenChrom	human
ReMap_ChIP	mm1s_dmso	BRD4	73369	273378	0.268379	16004	1288.86	44.5084	4.58443	0	0	Null_Model_OpenChrom	human
TxnFactorChIPV3	SK-N-SH	SIN3AK20	78615	273378	0.287569	17675.6	1369.17	44.5083	4.44766	0	0	Null_Model_OpenChrom	human
Pazar_Chip	IMR90_Senescent	RB1	56613	273378	0.207087	9970.88	1047.94	44.5083	5.67783	0	0	Null_Model_OpenChrom	human
Cistrome_ChIP	SKNO-1	FLI1	77548	273378	0.283666	17400.9	1351.37	44.5081	4.45655	0	0	Null_Model_OpenChrom	human
ReMap_ChIP	gist	ETV1	92471	273378	0.338253	24396	1529.56	44.5062	3.79042	0	0	Null_Model_OpenChrom	human
Cistrome_ChIP	HeLa	GABPA	32153	273378	0.117614	3774.39	637.641	44.5056	8.51874	0	0	Null_Model_OpenChrom	human
Misc_ChIP	LoVo	HOXA1	94718	273378	0.346473	25394.5	1557.64	44.5054	3.72986	0	0	Null_Model_OpenChrom	human
TxnFactorChIPV3	K562	BHLHE40	88228	273378	0.322733	22593	1474.86	44.5026	3.9051	0	0	Null_Model_OpenChrom	human
Cistrome_ChIP	LNCaP	ETV1	83582	273378	0.305738	19977.2	1429.25	44.5023	4.18387	0	0	Null_Model_OpenChrom	human
TxnFactorChIPV3	K562	UBTF	76609	273378	0.280231	17034.8	1338.68	44.5022	4.49721	0	0	Null_Model_OpenChrom	human
Cistrome_ChIP	Jurkat	GABPA	53005	273378	0.193889	9569.34	976.05	44.5015	5.53905	0	0	Null_Model_OpenChrom	human
TxnFactorChIPV3	SK-N-MC	POLR2A	92299	273378	0.337624	24086.9	1532.81	44.5012	3.83192	0	0	Null_Model_OpenChrom	human
ReMap_ChIP	cd36	SMARCA4	86480	273378	0.316339	21194.8	1467.06	44.5007	4.08025	0	0	Null_Model_OpenChrom	human
Misc_ChIP	LoVo	MZF1	70243	273378	0.256945	15392.3	1232.58	44.5006	4.56352	0	0	Null_Model_OpenChrom	human
Cistrome_ChIP	GM19193	RELA	50948	273378	0.186365	8959.89	943.547	44.5003	5.68623	0	0	Null_Model_OpenChrom	human
Misc_ChIP	LoVo	DLX1	109867	273378	0.401887	32975.8	1727.89	44.5	3.33175	0	0	Null_Model_OpenChrom	human
Cistrome_ChIP	K562	SP2	51662	273378	0.188976	8639.39	966.804	44.4998	5.97982	0	0	Null_Model_OpenChrom	human
Cistrome_ChIP	NT2-D1	YY1	65896	273378	0.241044	13089.9	1186.66	44.4996	5.0341	0	0	Null_Model_OpenChrom	human
TxnFactorChIPV3	A549+EtOH_0.02pct	GABPA	63555	273378	0.23248	12916.9	1137.96	44.4989	4.9203	0	0	Null_Model_OpenChrom	human
ReMap_ChIP	mm1s_jq1_500nm	BRD4	54212	273378	0.198304	10111.1	991.058	44.4989	5.36166	0	0	Null_Model_OpenChrom	human
Misc_ChIP	LoVo	GMEB1	78432	273378	0.286899	19490	1324.59	44.4983	4.02422	0	0	Null_Model_OpenChrom	human
TxnFactorChIPV3	K562	SIX5	36454	273378	0.133347	4861.95	709.968	44.4978	7.49782	0	0	Null_Model_OpenChrom	human
TxnFactorChIPV3	GM12878	RFX5	37963	273378	0.138866	5171.93	736.916	44.4977	7.34019	0	0	Null_Model_OpenChrom	human
Pazar_Chip	HeLa	P68	72950	273378	0.266847	16105.1	1277.48	44.4977	4.52963	0	0	Null_Model_OpenChrom	human
Cistrome_ChIP	GM12878	NFYB	51179	273378	0.18721	9234.9	942.654	44.4958	5.54191	0	0	Null_Model_OpenChrom	human
TxnFactorChIPV3	GM12878	ZEB1	42299	273378	0.154727	6200.77	811.284	44.4952	6.82157	0	0	Null_Model_OpenChrom	human
TxnFactorChIPV3	K562	GTF2F1	35858	273378	0.131166	4743.25	699.301	44.4941	7.5598	0	0	Null_Model_OpenChrom	human
Misc_ChIP	LoVo	LYL1	98206	273378	0.359232	26210.1	1618.13	44.4933	3.74687	0	0	Null_Model_OpenChrom	human
TxnFactorChIPV3	GM12878	STAT5A	47021	273378	0.172	7743.73	882.776	44.4929	6.07214	0	0	Null_Model_OpenChrom	human
TxnFactorChIPV3	PFSK-1	TAF1	45620	273378	0.166875	7247.47	862.446	44.4927	6.29461	0	0	Null_Model_OpenChrom	human
Cistrome_ChIP	ME-1	FLI1	52301	273378	0.191314	9404.39	964.152	44.4916	5.56134	0	0	Null_Model_OpenChrom	human
Misc_ChIP	LoVo	RARG	76157	273378	0.278578	18265.9	1301.19	44.4908	4.16934	0	0	Null_Model_OpenChrom	human
TxnFactorChIPV3	H1-hESC	SP4	46050	273378	0.168448	7604.1	864.145	44.4901	6.05594	0	0	Null_Model_OpenChrom	human
Cistrome_ChIP	HeLa	BRD4	57146	273378	0.209037	11194	1032.86	44.4901	5.10506	0	0	Null_Model_OpenChrom	human
TxnFactorChIPV3	HeLa-S3	NFYA	44467	273378	0.162658	7155.92	838.66	44.4889	6.21402	0	0	Null_Model_OpenChrom	human
ReMap_ChIP	k562	GATA1	80618	273378	0.294896	19987.8	1362.82	44.4886	4.03336	0	0	Null_Model_OpenChrom	human
TxnFactorChIPV3	K562+IFNa6h	IRF1	49827	273378	0.182264	8630.43	926.006	44.4884	5.77341	0	0	Null_Model_OpenChrom	human
ReMap_ChIP	293T_ctl	NCOR1	70805	273378	0.259	16255.1	1226.18	44.4877	4.35587	0	0	Null_Model_OpenChrom	human
TxnFactorChIPV3	SK-N-SH	POLR2A	103287	273378	0.377818	29126.7	1667.01	44.4869	3.54613	0	0	Null_Model_OpenChrom	human
ReMap_ChIP	amlpz12_leukemic	ERG	89226	273378	0.326383	23208.7	1483.99	44.4864	3.84451	0	0	Null_Model_OpenChrom	human
Misc_ChIP	BCells+Sendai_Virus	IRF3	37584	273378	0.13748	5450.86	722.328	44.4855	6.89506	0	0	Null_Model_OpenChrom	human
ReMap_ChIP	mm1s_dmso	MBD4	76953	273378	0.281489	18612	1311.47	44.4852	4.1346	0	0	Null_Model_OpenChrom	human
TxnFactorChIPV3	NT2-D1	YY1	38598	273378	0.141189	5887.87	735.308	44.485	6.55551	0	0	Null_Model_OpenChrom	human
Cistrome_ChIP	H1	SP1	98989	273378	0.362096	30394.2	1541.99	44.4845	3.25683	0	0	Null_Model_OpenChrom	human
TxnFactorChIPV3	H1-hESC	CHD2	49278	273378	0.180256	8645.8	913.412	44.484	5.69965	0	0	Null_Model_OpenChrom	human
ReMap_ChIP	lcl_hls554p	NIPBL	55855	273378	0.204314	10569.4	1018.03	44.4837	5.28461	0	0	Null_Model_OpenChrom	human
Cistrome_ChIP	GIST48	ETV1	78129	273378	0.285791	19014.2	1328.92	44.4835	4.10898	0	0	Null_Model_OpenChrom	human
Misc_ChIP	LoVo	DBP	69259	273378	0.253345	15846.2	1200.77	44.482	4.37071	0	0	Null_Model_OpenChrom	human
Misc_ChIP	LoVo	NFE2L2	84721	273378	0.309904	22459.1	1399.72	44.4815	3.77223	0	0	Null_Model_OpenChrom	human
Misc_ChIP	LoVo	MYC	118260	273378	0.432588	38718	1788.38	44.477	3.0544	0	0	Null_Model_OpenChrom	human
TxnFactorChIPV3	K562	JUND	112615	273378	0.411939	36326.9	1715.24	44.4768	3.10005	0	0	Null_Model_OpenChrom	human
ReMap_ChIP	lcl_bcbl1	SMC1A	99662	273378	0.364557	30078.8	1564.51	44.4761	3.31336	0	0	Null_Model_OpenChrom	human
TxnFactorChIPV3	K562	ATF3	68996	273378	0.252383	15911.9	1193.55	44.4758	4.33613	0	0	Null_Model_OpenChrom	human
TxnFactorChIPV3	HeLa-S3	BRCA1	48661	273378	0.177999	8982.32	892.142	44.4757	5.41742	0	0	Null_Model_OpenChrom	human
Misc_ChIP	LoVo	KLF5	108759	273378	0.397834	34119.5	1678.23	44.4752	3.18759	0	0	Null_Model_OpenChrom	human
TxnFactorChIPV3	HepG2	CEBPD	59557	273378	0.217856	12664.5	1054.37	44.4745	4.70266	0	0	Null_Model_OpenChrom	human
Misc_ChIP	LoVo	GLI3	78932	273378	0.288728	19673.5	1332.44	44.4736	4.01209	0	0	Null_Model_OpenChrom	human
Misc_ChIP	LoVo	BARHL1	79876	273378	0.292182	20075	1344.64	44.4736	3.97887	0	0	Null_Model_OpenChrom	human
ReMap_ChIP	k562	NFYB	63964	273378	0.233976	14512.7	1111.93	44.4734	4.40746	0	0	Null_Model_OpenChrom	human
Cistrome_ChIP	SK-N-SH	YY1	64566	273378	0.236178	14223.6	1131.97	44.4734	4.53935	0	0	Null_Model_OpenChrom	human
TxnFactorChIPV3	GM19099+TNFa	RELA	46981	273378	0.171854	8028.29	875.867	44.4733	5.85193	0	0	Null_Model_OpenChrom	human
Misc_ChIP	LoVo	VEZF1	82921	273378	0.30332	22059.3	1368.55	44.4716	3.75901	0	0	Null_Model_OpenChrom	human
Pazar_Chip	CD4+	HMGN1	180030	273378	0.658539	81331.1	2219.39	44.4711	2.21355	0	0	Null_Model_OpenChrom	human
TxnFactorChIPV3	HepG2	CHD2	43194	273378	0.158001	6886.87	816.423	44.471	6.27193	0	0	Null_Model_OpenChrom	human
TxnFactorChIPV3	K562	THAP1	34319	273378	0.125537	4542.03	669.59	44.4704	7.55587	0	0	Null_Model_OpenChrom	human
ReMap_ChIP	hek293	BRD2	138385	273378	0.506204	50412.9	1978.22	44.4704	2.74503	0	0	Null_Model_OpenChrom	human
ReMap_ChIP	cd4	SMARCA4	51029	273378	0.186661	9763.79	927.926	44.4704	5.22635	0	0	Null_Model_OpenChrom	human
TxnFactorChIPV3	H1-hESC	SP1	67535	273378	0.247039	15821.5	1162.88	44.4702	4.26857	0	0	Null_Model_OpenChrom	human
Cistrome_ChIP	H1	MYC	46110	273378	0.168668	8088.71	854.992	44.4698	5.70054	0	0	Null_Model_OpenChrom	human
ReMap_ChIP	sclc_h2171	MYC	108941	273378	0.3985	33962.7	1686.07	44.4693	3.20767	0	0	Null_Model_OpenChrom	human
TxnFactorChIPV3	HeLa-S3	MYC	59155	273378	0.216385	12800.2	1042.41	44.469	4.62141	0	0	Null_Model_OpenChrom	human
ReMap_ChIP	huvec_tnf	RELA	87711	273378	0.320841	24758.6	1415.65	44.4689	3.54265	0	0	Null_Model_OpenChrom	human
Misc_ChIP	LoVo	FOXG1	71236	273378	0.260577	17898.5	1199.44	44.4689	3.98	0	0	Null_Model_OpenChrom	human
TxnFactorChIPV3	H1-hESC	NRF1	39303	273378	0.143768	6204.4	744.32	44.4682	6.3347	0	0	Null_Model_OpenChrom	human
Cistrome_ChIP	LeukemicBlastCell	PML	60591	273378	0.221638	13026	1069.66	44.4672	4.65154	0	0	Null_Model_OpenChrom	human
ReMap_ChIP	bcell	SMARCA4	30119	273378	0.110173	3875.76	590.179	44.4666	7.77113	0	0	Null_Model_OpenChrom	human
TxnFactorChIPV3	A549+EtOH_0.02pct	SIX5	37770	273378	0.13816	5732.11	720.525	44.4647	6.58919	0	0	Null_Model_OpenChrom	human
Misc_ChIP	LoVo	GLI2	64099	273378	0.23447	14490.4	1115.69	44.4646	4.42354	0	0	Null_Model_OpenChrom	human
ReMap_ChIP	hesc	BRD4	122797	273378	0.449184	42158.2	1813.57	44.4641	2.91277	0	0	Null_Model_OpenChrom	human
Cistrome_ChIP	NB4	EP300	65173	273378	0.238399	14536.7	1138.82	44.4638	4.48333	0	0	Null_Model_OpenChrom	human
ReMap_ChIP	skno1_leukemic	FLI1	90686	273378	0.331724	26244.9	1449.31	44.4633	3.45537	0	0	Null_Model_OpenChrom	human
Cistrome_ChIP	HeLa-S3	NFYA	43868	273378	0.160466	7504.46	817.834	44.4632	5.84559	0	0	Null_Model_OpenChrom	human
Pazar_Chip	THP-1	SPI1	123022	273378	0.450007	43796.3	1781.85	44.4627	2.80896	0	0	Null_Model_OpenChrom	human
ReMap_ChIP	u87	MAX	126645	273378	0.46326	45303.4	1829.44	44.4626	2.79549	0	0	Null_Model_OpenChrom	human
Cistrome_ChIP	MR4	PML	60591	273378	0.221638	13029.4	1069.7	44.4624	4.65031	0	0	Null_Model_OpenChrom	human
TxnFactorChIPV3	GM12878	BCL11A	61487	273378	0.224916	13714.6	1074.48	44.4612	4.48333	0	0	Null_Model_OpenChrom	human
Misc_ChIP	LoVo	TP73	80051	273378	0.292822	21128.7	1325.28	44.4602	3.78874	0	0	Null_Model_OpenChrom	human
TxnFactorChIPV3	HUVEC	MAX	54088	273378	0.197851	11367.7	960.884	44.4594	4.75806	0	0	Null_Model_OpenChrom	human
TxnFactorChIPV3	H1-hESC	SIN3AK20	53060	273378	0.19409	11063.6	944.616	44.4587	4.79591	0	0	Null_Model_OpenChrom	human
Misc_ChIP	LoVo	ETS2	115061	273378	0.420886	37784.6	1738.17	44.4585	3.04518	0	0	Null_Model_OpenChrom	human
Cistrome_ChIP	A549	SP1	122351	273378	0.447552	41426	1820.25	44.4581	2.95348	0	0	Null_Model_OpenChrom	human
Misc_ChIP	LoVo	NKX2.2	95686	273378	0.350014	29727.8	1483.61	44.4579	3.21874	0	0	Null_Model_OpenChrom	human
Cistrome_ChIP	HEK293	ELK4	25520	273378	0.0933506	2892.6	508.962	44.4579	8.8225	0	0	Null_Model_OpenChrom	human
TxnFactorChIPV3	A549+EtOH_0.02pct	ETS1	40987	273378	0.149928	6495.14	775.86	44.4563	6.31041	0	0	Null_Model_OpenChrom	human
Cistrome_ChIP	OCI-Ly10	IRF4	42379	273378	0.15502	7059.96	794.48	44.4555	6.00273	0	0	Null_Model_OpenChrom	human
Misc_ChIP	LoVo	RXRA	110196	273378	0.40309	36429.8	1659.33	44.4554	3.02488	0	0	Null_Model_OpenChrom	human
Cistrome_ChIP	DendriticCell	TCF4	57536	273378	0.210463	12184	1020.18	44.4548	4.72226	0	0	Null_Model_OpenChrom	human
TxnFactorChIPV3	GM12878	NFATC1	50044	273378	0.183058	9962.27	901.631	44.4547	5.02335	0	0	Null_Model_OpenChrom	human
Cistrome_ChIP	VCaP+DMSO	BRD4	86887	273378	0.317827	24543.1	1402.41	44.4547	3.54018	0	0	Null_Model_OpenChrom	human
Misc_ChIP	LoVo	EHF	78900	273378	0.288611	21195.9	1298.07	44.4537	3.72242	0	0	Null_Model_OpenChrom	human
ReMap_ChIP	hela	MYC	119450	273378	0.436941	41675.6	1749.57	44.4535	2.86618	0	0	Null_Model_OpenChrom	human
ReMap_ChIP	vcap_dht18hr	AR	88789	273378	0.324785	25606.7	1421.31	44.4534	3.46741	0	0	Null_Model_OpenChrom	human
Misc_ChIP	LoVo	ATOH1	78073	273378	0.285586	20723.8	1290.12	44.4526	3.76732	0	0	Null_Model_OpenChrom	human
TxnFactorChIPV3	HCT-116	TCF7L2	75816	273378	0.27733	20158.4	1252.08	44.4521	3.76101	0	0	Null_Model_OpenChrom	human
ReMap_ChIP	kasumi1_leukemic	TCF12	96753	273378	0.353917	29398.3	1515.22	44.4521	3.2911	0	0	Null_Model_OpenChrom	human
Misc_ChIP	LoVo	TEAD2	80313	273378	0.29378	21349.9	1326.48	44.4509	3.76175	0	0	Null_Model_OpenChrom	human
Cistrome_ChIP	VCaP	BRD2	75917	273378	0.2777	20412.8	1248.69	44.45	3.71909	0	0	Null_Model_OpenChrom	human
Cistrome_ChIP	H2171	MYC	136378	273378	0.498862	52670.5	1883.2	44.4497	2.58927	0	0	Null_Model_OpenChrom	human
ReMap_ChIP	imr90h	GTF2B	37482	273378	0.137107	6115.1	705.679	44.4493	6.12941	0	0	Null_Model_OpenChrom	human
ReMap_ChIP	plasma_dmso	CDK9	48843	273378	0.178665	9360.49	888.269	44.4488	5.218	0	0	Null_Model_OpenChrom	human
Misc_ChIP	LoVo	HES4	71020	273378	0.259787	18023.1	1192.33	44.4483	3.94049	0	0	Null_Model_OpenChrom	human
Misc_ChIP	LoVo	NIPBL	114204	273378	0.417751	39981.5	1669.87	44.448	2.85642	0	0	Null_Model_OpenChrom	human
Cistrome_ChIP	T98G	EP300	111825	273378	0.409049	37864.7	1664.05	44.4458	2.95328	0	0	Null_Model_OpenChrom	human
Cistrome_ChIP	Cardiomyocyte	EP300	61260	273378	0.224085	14416.7	1053.96	44.445	4.24925	0	0	Null_Model_OpenChrom	human
Cistrome_ChIP	H929	SPI1	57596	273378	0.210683	12420.5	1016.45	44.4444	4.63716	0	0	Null_Model_OpenChrom	human
TxnFactorChIPV3	HeLa-S3	NRF1	28264	273378	0.103388	3868.53	548.92	44.4426	7.30613	0	0	Null_Model_OpenChrom	human
Cistrome_ChIP	GM10847	RELA	33873	273378	0.123905	5385.05	641.01	44.4423	6.29019	0	0	Null_Model_OpenChrom	human
Misc_ChIP	BCells+Sendai_Virus	Pol_II	107724	273378	0.394048	36289.3	1607.38	44.4418	2.96848	0	0	Null_Model_OpenChrom	human
Misc_ChIP	LoVo	FOXD2	74792	273378	0.273585	20428.6	1223.29	44.4405	3.66115	0	0	Null_Model_OpenChrom	human
ReMap_ChIP	vcap_dht2hr	AR	65949	273378	0.241237	16772.3	1106.58	44.4404	3.93203	0	0	Null_Model_OpenChrom	human
Cistrome_ChIP	UPR9	PML	55385	273378	0.202595	12288.3	969.77	44.4402	4.50715	0	0	Null_Model_OpenChrom	human
ReMap_ChIP	plasma_jq1	MYC	39324	273378	0.143845	6863.64	730.437	44.4396	5.72932	0	0	Null_Model_OpenChrom	human
Cistrome_ChIP	A549	RELA	130885	273378	0.478769	49521.8	1830.88	44.4394	2.64298	0	0	Null_Model_OpenChrom	human
Cistrome_ChIP	HCT-116	ELF1	32498	273378	0.118876	4650.82	626.634	44.4393	6.98758	0	0	Null_Model_OpenChrom	human
TxnFactorChIPV3	HeLa-S3	ZNF143	44757	273378	0.163718	8370.91	818.796	44.4385	5.34673	0	0	Null_Model_OpenChrom	human
TxnFactorChIPV3	K562	SPI1	80239	273378	0.293509	22630.6	1296.38	44.4378	3.54559	0	0	Null_Model_OpenChrom	human
TxnFactorChIPV3	PANC-1	POLR2A	58172	273378	0.21279	13097.6	1014.35	44.4369	4.44143	0	0	Null_Model_OpenChrom	human
Cistrome_ChIP	BJ	MYC	88421	273378	0.323439	27013.4	1381.91	44.4367	3.27323	0	0	Null_Model_OpenChrom	human
TxnFactorChIPV3	HeLa-S3	GTF2F1	56579	273378	0.206963	12728.4	986.836	44.4356	4.44511	0	0	Null_Model_OpenChrom	human
ReMap_ChIP	a549	NFKB1	139493	273378	0.510257	55267	1895.51	44.4346	2.52398	0	0	Null_Model_OpenChrom	human
TxnFactorChIPV3	PANC-1	SIN3AK20	47783	273378	0.174787	9403.89	863.735	44.4339	5.0812	0	0	Null_Model_OpenChrom	human
TxnFactorChIPV3	K562	SP2	29632	273378	0.108392	4011.19	576.614	44.4332	7.38733	0	0	Null_Model_OpenChrom	human
Cistrome_ChIP	HEK293	BRD2	136692	273378	0.500011	52661.7	1891.21	44.4321	2.59566	0	0	Null_Model_OpenChrom	human
TxnFactorChIPV3	GM12878	STAT3	36683	273378	0.134184	6096.67	688.396	44.4313	6.01689	0	0	Null_Model_OpenChrom	human
Misc_ChIP	BCells	Pol_II	96764	273378	0.353957	31545.6	1467.85	44.4313	3.06744	0	0	Null_Model_OpenChrom	human
Cistrome_ChIP	H2171	BRD4	145169	273378	0.531019	59549.9	1927.07	44.4296	2.43777	0	0	Null_Model_OpenChrom	human
Cistrome_ChIP	VCaP	BRD3	84754	273378	0.310025	25028.5	1344.29	44.4291	3.3863	0	0	Null_Model_OpenChrom	human
ReMap_ChIP	hek293	BRD3	88691	273378	0.324426	27089.6	1386.52	44.4287	3.27399	0	0	Null_Model_OpenChrom	human
Cistrome_ChIP	HepG2	SP2	24172	273378	0.0884197	2919.57	478.357	44.4279	8.27929	0	0	Null_Model_OpenChrom	human
ReMap_ChIP	thp1	SPI1	108689	273378	0.397578	37410.7	1604.36	44.4278	2.90529	0	0	Null_Model_OpenChrom	human
Misc_ChIP	LoVo	JUND	130433	273378	0.477116	51256.5	1782.18	44.4269	2.54471	0	0	Null_Model_OpenChrom	human
TxnFactorChIPV3	SK-N-SH_RA	USF1	70247	273378	0.256959	19102.6	1151.21	44.4264	3.67735	0	0	Null_Model_OpenChrom	human
Cistrome_ChIP	HepG2	SP1	91650	273378	0.33525	28754.9	1415.71	44.4264	3.18729	0	0	Null_Model_OpenChrom	human
Cistrome_ChIP	HL-60	SPI1	132209	273378	0.483612	51275.2	1821.79	44.4254	2.57842	0	0	Null_Model_OpenChrom	human
Cistrome_ChIP	HEK293	BRD3	74227	273378	0.271518	19599	1229.66	44.4254	3.78729	0	0	Null_Model_OpenChrom	human
Pazar_Chip	megakaryocytes	RUNX1	43527	273378	0.159219	8374.03	791.303	44.4242	5.19786	0	0	Null_Model_OpenChrom	human
TxnFactorChIPV3	GM12878	ZNF143	72417	273378	0.264897	18961.9	1203.3	44.4239	3.81908	0	0	Null_Model_OpenChrom	human
TxnFactorChIPV3	K562	RCOR1	93908	273378	0.34351	30429.7	1428.93	44.4236	3.08607	0	0	Null_Model_OpenChrom	human
TxnFactorChIPV3	U87	REST	59783	273378	0.218683	13603.8	1039.53	44.4229	4.39457	0	0	Null_Model_OpenChrom	human
TxnFactorChIPV3	GM12878	BCL3	60403	273378	0.22095	13911.1	1046.58	44.4228	4.34207	0	0	Null_Model_OpenChrom	human
Cistrome_ChIP	VCaP+BET762	BRD4	74516	273378	0.272575	20276.3	1221	44.4224	3.67502	0	0	Null_Model_OpenChrom	human
TxnFactorChIPV3	H1-hESC	RBBP5	74136	273378	0.271185	20200.2	1214.18	44.4215	3.67006	0	0	Null_Model_OpenChrom	human
ReMap_ChIP	mcf7_cancer	ERG	108038	273378	0.395196	37347.3	1591.36	44.4215	2.89279	0	0	Null_Model_OpenChrom	human
TxnFactorChIPV3	HeLa-S3	E2F4	27151	273378	0.0993167	3779.81	526.124	44.4214	7.18317	0	0	Null_Model_OpenChrom	human
ReMap_ChIP	cutll	RBPJ	34399	273378	0.125829	5399.85	652.824	44.4211	6.37036	0	0	Null_Model_OpenChrom	human
TxnFactorChIPV3	HCT-116	ZBTB33	34465	273378	0.126071	5595.03	649.927	44.4203	6.15993	0	0	Null_Model_OpenChrom	human
Cistrome_ChIP	GP5d	MYC	40155	273378	0.146885	6988.89	746.656	44.4195	5.74555	0	0	Null_Model_OpenChrom	human
TxnFactorChIPV3	H1-hESC	GTF2F1	31336	273378	0.114625	4802.12	597.414	44.4146	6.52545	0	0	Null_Model_OpenChrom	human
TxnFactorChIPV3	K562	GTF2B	26544	273378	0.0970963	3663.13	515.179	44.4134	7.24626	0	0	Null_Model_OpenChrom	human
Cistrome_ChIP	NHEK	MYC	55217	273378	0.20198	12491.9	961.995	44.413	4.42023	0	0	Null_Model_OpenChrom	human
TxnFactorChIPV3	HeLa-S3	NFYB	39844	273378	0.145747	7536.16	727.464	44.4116	5.28704	0	0	Null_Model_OpenChrom	human
TxnFactorChIPV3	MCF-7+estrogen	MYC	50525	273378	0.184817	10928.9	891.579	44.4112	4.62307	0	0	Null_Model_OpenChrom	human
Pazar_Chip	IMR90_Quiescent	RB1	32992	273378	0.120683	5184.02	626.154	44.4107	6.36418	0	0	Null_Model_OpenChrom	human
Cistrome_ChIP	H1	YY1	116666	273378	0.426757	44585	1623.07	44.4102	2.61671	0	0	Null_Model_OpenChrom	human
TxnFactorChIPV3	H1-hESC	YY1	67584	273378	0.247218	18475.1	1105.8	44.4101	3.65812	0	0	Null_Model_OpenChrom	human
TxnFactorChIPV3	K562	TBL1XR1	49952	273378	0.182721	10692.8	884.02	44.4099	4.67157	0	0	Null_Model_OpenChrom	human
TxnFactorChIPV3	HepG2	RFX5	37471	273378	0.137067	6823.27	690.11	44.4099	5.49165	0	0	Null_Model_OpenChrom	human
TxnFactorChIPV3	K562	ATF1	53868	273378	0.197046	12833.7	924.013	44.4088	4.19739	0	0	Null_Model_OpenChrom	human
Cistrome_ChIP	GM18951	RELA	34401	273378	0.125837	5653.31	647.362	44.4075	6.08511	0	0	Null_Model_OpenChrom	human
ReMap_ChIP	bgo3	POU5F1	89887	273378	0.328801	29307.4	1364.18	44.4074	3.06704	0	0	Null_Model_OpenChrom	human
ReMap_ChIP	cutll	ZNF143	39146	273378	0.143194	7384.53	715.231	44.4073	5.30108	0	0	Null_Model_OpenChrom	human
TxnFactorChIPV3	K562	NFYA	31342	273378	0.114647	4834.47	596.923	44.407	6.48302	0	0	Null_Model_OpenChrom	human
Cistrome_ChIP	HeLa-S3	MYC	86069	273378	0.314835	26549	1340.39	44.405	3.24189	0	0	Null_Model_OpenChrom	human
Misc_ChIP	LoVo	TFDP1	53757	273378	0.19664	12513.6	928.811	44.4046	4.2959	0	0	Null_Model_OpenChrom	human
TxnFactorChIPV3	SK-N-MC	FOXP2	59187	273378	0.216502	14393	1008.78	44.404	4.11222	0	0	Null_Model_OpenChrom	human
Misc_ChIP	LoVo	SMC1A	138954	273378	0.508285	58904.1	1802.91	44.4005	2.35899	0	0	Null_Model_OpenChrom	human
TxnFactorChIPV3	GM19193+TNFa	RELA	33357	273378	0.122018	5583.99	625.522	44.3997	5.97369	0	0	Null_Model_OpenChrom	human
TxnFactorChIPV3	K562	ZNF143	81679	273378	0.298777	25742.2	1259.86	44.3992	3.17296	0	0	Null_Model_OpenChrom	human
TxnFactorChIPV3	MCF10A-Er-Src+EtOH_0.01pct	MYC	93073	273378	0.340455	31108.8	1395.64	44.3983	2.99185	0	0	Null_Model_OpenChrom	human
TxnFactorChIPV3	HepG2	BHLHE40	61790	273378	0.226024	15836.2	1035.06	44.3974	3.90183	0	0	Null_Model_OpenChrom	human
TxnFactorChIPV3	K562	BCLAF1	31979	273378	0.116977	5222.59	602.662	44.397	6.12321	0	0	Null_Model_OpenChrom	human
Misc_ChIP	LoVo	NR3C1	57439	273378	0.210108	14274.1	972.249	44.3969	4.024	0	0	Null_Model_OpenChrom	human
Misc_ChIP	CD34+	RUNX1	65945	273378	0.241223	17400.2	1093.43	44.3968	3.78991	0	0	Null_Model_OpenChrom	human
Cistrome_ChIP	U87	BRD4	127986	273378	0.468165	50934.1	1735.53	44.3967	2.51277	0	0	Null_Model_OpenChrom	human
TxnFactorChIPV3	HepG2	MYBL2	64234	273378	0.234964	16537.6	1074.33	44.3963	3.88412	0	0	Null_Model_OpenChrom	human
Misc_ChIP	LoVo	SMC3	140611	273378	0.514346	61285.3	1786.79	44.3956	2.29437	0	0	Null_Model_OpenChrom	human
Cistrome_ChIP	L428-PAX5	PAX5	59883	273378	0.219048	15283.3	1004.67	44.3926	3.9182	0	0	Null_Model_OpenChrom	human
Misc_ChIP	LoVo	ZNF250	76045	273378	0.278168	21846.7	1220.95	44.3901	3.48084	0	0	Null_Model_OpenChrom	human
TxnFactorChIPV3	HepG2	MYC	33344	273378	0.12197	5778.8	620.984	44.3895	5.77005	0	0	Null_Model_OpenChrom	human
TxnFactorChIPV3	GM12878	FOS	23235	273378	0.0849922	2958.08	456.806	44.3885	7.85476	0	0	Null_Model_OpenChrom	human
Cistrome_ChIP	A549	EP300	82818	273378	0.302943	26104.4	1277.76	44.3853	3.17257	0	0	Null_Model_OpenChrom	human
TxnFactorChIPV3	GM12891	PAX5	25018	273378	0.0915143	3424.75	486.506	44.3843	7.30506	0	0	Null_Model_OpenChrom	human
Cistrome_ChIP	FB0167P	MYC	35406	273378	0.129513	6472.77	651.888	44.3838	5.46999	0	0	Null_Model_OpenChrom	human
Misc_ChIP	LoVo	MYBL2	48121	273378	0.176024	10811.6	840.618	44.3833	4.45086	0	0	Null_Model_OpenChrom	human
Cistrome_ChIP	EndothelialCell	FLI1	138858	273378	0.507934	58585	1808.67	44.3823	2.3702	0	0	Null_Model_OpenChrom	human
Cistrome_ChIP	HeLa-S3	NFYB	37777	273378	0.138186	7661.57	678.55	44.382	4.93072	0	0	Null_Model_OpenChrom	human
Misc_ChIP	LoVo	ESR1	50972	273378	0.186452	11881.2	880.792	44.3814	4.29012	0	0	Null_Model_OpenChrom	human
TxnFactorChIPV3	HeLa-S3	SMARCB1	46701	273378	0.170829	10318.6	819.767	44.3813	4.52588	0	0	Null_Model_OpenChrom	human
TxnFactorChIPV3	GM19238	CTCF	108614	273378	0.397303	41687.1	1508.01	44.3808	2.60546	0	0	Null_Model_OpenChrom	human
Pazar_Chip	IMR90_Growing	RB1	31280	273378	0.11442	5286.21	585.703	44.3805	5.91729	0	0	Null_Model_OpenChrom	human
Misc_ChIP	PBMC	STAT4	48851	273378	0.178694	11091.6	850.834	44.3793	4.40431	0	0	Null_Model_OpenChrom	human
Misc_ChIP	LoVo	NPAT	37361	273378	0.136664	6912.71	686.094	44.3792	5.40468	0	0	Null_Model_OpenChrom	human
Cistrome_ChIP	HCT-116	SP1	76366	273378	0.279342	23616.3	1188.62	44.3791	3.23362	0	0	Null_Model_OpenChrom	human
TxnFactorChIPV3	K562	TAF7	27571	273378	0.100853	4054.04	529.924	44.378	6.80087	0	0	Null_Model_OpenChrom	human
Cistrome_ChIP	LoVo	SP1	20039	273378	0.0733014	2336.78	398.909	44.3766	8.57549	0	0	Null_Model_OpenChrom	human
TxnFactorChIPV3	H1-hESC	MXI1	41500	273378	0.151804	8067.19	753.396	44.3762	5.1443	0	0	Null_Model_OpenChrom	human
TxnFactorChIPV3	GM12892	CTCF	107562	273378	0.393455	40506.8	1511.09	44.3753	2.65541	0	0	Null_Model_OpenChrom	human
TxnFactorChIPV3	SK-N-SH	REST	80557	273378	0.294673	24847.2	1255.45	44.3743	3.2421	0	0	Null_Model_OpenChrom	human
TxnFactorChIPV3	H1-hESC	CHD1	45167	273378	0.165218	10031.4	791.802	44.3742	4.50254	0	0	Null_Model_OpenChrom	human
Cistrome_ChIP	H1	EP300	61182	273378	0.2238	16522.6	1006.52	44.3701	3.70292	0	0	Null_Model_OpenChrom	human
TxnFactorChIPV3	HepG2	SP1	73828	273378	0.270058	22014.3	1167.82	44.3681	3.35364	0	0	Null_Model_OpenChrom	human
Misc_ChIP	LoVo	UBTF	48722	273378	0.178222	10957.8	851.158	44.368	4.44632	0	0	Null_Model_OpenChrom	human
Misc_ChIP	LoVo	E2F2	82323	273378	0.301132	26663.4	1254.52	44.3671	3.08749	0	0	Null_Model_OpenChrom	human
Cistrome_ChIP	Megakaryocyte	FLI1	23324	273378	0.0853178	3322.28	450.825	44.3669	7.02048	0	0	Null_Model_OpenChrom	human
TxnFactorChIPV3	K562	USF1	61077	273378	0.223416	16863.2	996.563	44.3663	3.62192	0	0	Null_Model_OpenChrom	human
TxnFactorChIPV3	HepG2	NRF1	20474	273378	0.0748926	2565.58	403.649	44.3663	7.98027	0	0	Null_Model_OpenChrom	human
TxnFactorChIPV3	K562	SRF	30842	273378	0.112818	5084.9	580.559	44.366	6.06541	0	0	Null_Model_OpenChrom	human
ReMap_ChIP	blood_macrophage	SPI1	101268	273378	0.370432	38757.5	1409.03	44.3642	2.61286	0	0	Null_Model_OpenChrom	human
TxnFactorChIPV3	GM12878	NFYA	19725	273378	0.0721528	2383.87	390.895	44.3626	8.27435	0	0	Null_Model_OpenChrom	human
Misc_ChIP	LoVo	RFX5	58946	273378	0.215621	15357.2	982.56	44.3624	3.83832	0	0	Null_Model_OpenChrom	human
Cistrome_ChIP	CD4+	EP300	18927	273378	0.0692338	2256.9	375.786	44.3607	8.3863	0	0	Null_Model_OpenChrom	human
Misc_ChIP	LoVo	HOXA13	64280	273378	0.235132	18919.8	1022.65	44.3556	3.3975	0	0	Null_Model_OpenChrom	human
TxnFactorChIPV3	GM12891	CTCF	101508	273378	0.37131	37712.1	1438.3	44.3552	2.69166	0	0	Null_Model_OpenChrom	human
TxnFactorChIPV3	GM18526+TNFa	RELA	23896	273378	0.0874101	3459.99	460.736	44.3551	6.90637	0	0	Null_Model_OpenChrom	human
Cistrome_ChIP	GM18526	RELA	22295	273378	0.0815537	3167.84	431.236	44.3543	7.03791	0	0	Null_Model_OpenChrom	human
ReMap_ChIP	bcellp493-6_cmyc1hr	BRD4	18008	273378	0.0658722	2019.6	360.475	44.3537	8.9166	0	0	Null_Model_OpenChrom	human
TxnFactorChIPV3	H1-hESC	KDM5A	17693	273378	0.0647199	1938.53	355.203	44.3535	9.12702	0	0	Null_Model_OpenChrom	human
TxnFactorChIPV3	HeLa-S3	IRF3	18105	273378	0.066227	2114.03	360.544	44.3523	8.5642	0	0	Null_Model_OpenChrom	human
TxnFactorChIPV3	GM19239	CTCF	97794	273378	0.357724	35496.6	1404.6	44.3522	2.75502	0	0	Null_Model_OpenChrom	human
Cistrome_ChIP	ECC-1	EP300	84942	273378	0.310713	28929.8	1262.91	44.3516	2.93615	0	0	Null_Model_OpenChrom	human
Misc_ChIP	LoVo	REST	80864	273378	0.295796	26879.5	1217.23	44.3504	3.00839	0	0	Null_Model_OpenChrom	human
ReMap_ChIP	h2171	MYC	70701	273378	0.25862	21369.6	1112.36	44.3486	3.30849	0	0	Null_Model_OpenChrom	human
TxnFactorChIPV3	K562	EP300	70083	273378	0.256359	21309.3	1099.79	44.348	3.28884	0	0	Null_Model_OpenChrom	human
ReMap_ChIP	tall_rpmi8402	TAL1	87899	273378	0.321529	30901.5	1285.29	44.3459	2.84449	0	0	Null_Model_OpenChrom	human
Cistrome_ChIP	A549	MYC	25437	273378	0.093047	3753.26	488.968	44.3459	6.7773	0	0	Null_Model_OpenChrom	human
TxnFactorChIPV3	H1-hESC	SP2	22175	273378	0.0811148	3110.75	429.904	44.3453	7.1285	0	0	Null_Model_OpenChrom	human
Cistrome_ChIP	CD133+	POLR2A	30409	273378	0.111234	5362.42	564.819	44.3444	5.67076	0	0	Null_Model_OpenChrom	human
TxnFactorChIPV3	GM12878	ZBTB33	21107	273378	0.0772081	2779.37	413.306	44.344	7.59416	0	0	Null_Model_OpenChrom	human
ReMap_ChIP	mcf7	NR2F2	112270	273378	0.410677	44964.9	1517.81	44.3437	2.49683	0	0	Null_Model_OpenChrom	human
TxnFactorChIPV3	HepG2	NR2C2	25005	273378	0.0914668	3781.1	478.628	44.3432	6.61315	0	0	Null_Model_OpenChrom	human
TxnFactorChIPV3	K562	NFYB	41368	273378	0.151322	9036.29	729.13	44.3428	4.57798	0	0	Null_Model_OpenChrom	human
Cistrome_ChIP	GM18505	RELA	29106	273378	0.106468	4999.6	543.641	44.3425	5.82166	0	0	Null_Model_OpenChrom	human
TxnFactorChIPV3	A549+EtOH_0.02pct	USF1	52734	273378	0.192898	13955.5	874.549	44.3412	3.77873	0	0	Null_Model_OpenChrom	human
TxnFactorChIPV3	GM19240	CTCF	101154	273378	0.370015	38469.7	1413.74	44.3393	2.62944	0	0	Null_Model_OpenChrom	human
ReMap_ChIP	nb4_leukemic	FLI1	58122	273378	0.212607	16073.3	948.342	44.3392	3.61606	0	0	Null_Model_OpenChrom	human
TxnFactorChIPV3	HeLa-S3	RFX5	62050	273378	0.226975	17273.7	1009.87	44.3385	3.59216	0	0	Null_Model_OpenChrom	human
Cistrome_ChIP	OCI-Ly3	IRF4	24575	273378	0.0898938	3665.14	471.598	44.3383	6.70507	0	0	Null_Model_OpenChrom	human
Cistrome_ChIP	Monocyte_CD14+	IRF1	59321	273378	0.216993	16020.1	976.624	44.3374	3.70291	0	0	Null_Model_OpenChrom	human
ReMap_ChIP	lymphoblastoid	E2F4	19605	273378	0.0717139	2522.55	385.301	44.3353	7.77189	0	0	Null_Model_OpenChrom	human
ReMap_ChIP	k562_leukemic	ERG	72943	273378	0.266821	23319.5	1119.32	44.3335	3.12798	0	0	Null_Model_OpenChrom	human
TxnFactorChIPV3	HeLa-S3	RCOR1	60807	273378	0.222428	16933.5	989.645	44.3325	3.59093	0	0	Null_Model_OpenChrom	human
Cistrome_ChIP	NB4	FLI1	49531	273378	0.181181	12602.4	832.99	44.3325	3.93028	0	0	Null_Model_OpenChrom	human
Cistrome_ChIP	H1	SPI1	134011	273378	0.490204	60452.2	1659.27	44.3321	2.21681	0	0	Null_Model_OpenChrom	human
TxnFactorChIPV3	GM12878	BATF	67770	273378	0.247899	21387.7	1046.29	44.3304	3.16865	0	0	Null_Model_OpenChrom	human
Cistrome_ChIP	H9	EP300	82225	273378	0.300774	28112.5	1220.67	44.3302	2.92485	0	0	Null_Model_OpenChrom	human
Misc_ChIP	LoVo	EGR1	57293	273378	0.209574	15652.1	939.375	44.3283	3.6604	0	0	Null_Model_OpenChrom	human
ReMap_ChIP	a375	TFAP2C	120263	273378	0.439915	50137.1	1582	44.3275	2.39868	0	0	Null_Model_OpenChrom	human
Misc_ChIP	LoVo	RBCK1	41945	273378	0.153432	9443.31	733.231	44.3266	4.44177	0	0	Null_Model_OpenChrom	human
Misc_ChIP	LoVo	ZBED4	49641	273378	0.181584	12643.6	834.675	44.3255	3.92619	0	0	Null_Model_OpenChrom	human
Misc_ChIP	LoVo	HOXA10	63253	273378	0.231376	18547.8	1008.57	44.3252	3.41028	0	0	Null_Model_OpenChrom	human
Cistrome_ChIP	EWS502	FLI1	151277	273378	0.553362	73945.5	1744.65	44.325	2.04579	0	0	Null_Model_OpenChrom	human
Misc_ChIP	LoVo	CLOCK	75671	273378	0.2768	25241.3	1137.75	44.3241	2.9979	0	0	Null_Model_OpenChrom	human
Cistrome_ChIP	T47D	EP300	64349	273378	0.235385	19431.1	1013.43	44.3227	3.31165	0	0	Null_Model_OpenChrom	human
TxnFactorChIPV3	H1-hESC	MYC	34922	273378	0.127743	6980.23	630.458	44.3198	5.00299	0	0	Null_Model_OpenChrom	human
ReMap_ChIP	sclc_h2171_dmso	BRD4	79979	273378	0.292558	27487	1184.45	44.3178	2.90971	0	0	Null_Model_OpenChrom	human
Cistrome_ChIP	VCaP+MDV3100_DHT	BRD4	20597	273378	0.0753426	2866.32	400.13	44.3122	7.18586	0	0	Null_Model_OpenChrom	human
TxnFactorChIPV3	H1-hESC	ATF3	29314	273378	0.107229	5440.48	538.771	44.3111	5.38813	0	0	Null_Model_OpenChrom	human
Cistrome_ChIP	H1	SP2	20769	273378	0.0759717	2925.64	402.7	44.3093	7.09895	0	0	Null_Model_OpenChrom	human
Cistrome_ChIP	HeLa-S3	IRF3	15202	273378	0.055608	1732.01	304.014	44.3071	8.77708	0	0	Null_Model_OpenChrom	human
TxnFactorChIPV3	H1-hESC	JUND	53893	273378	0.197137	14770.4	883.003	44.3063	3.64871	0	0	Null_Model_OpenChrom	human
Cistrome_ChIP	OCI-Ly10	SPI1	25591	273378	0.0936103	4177.94	483.297	44.3062	6.12527	0	0	Null_Model_OpenChrom	human
TxnFactorChIPV3	GM12878	RXRA	16803	273378	0.0614643	2061.63	332.723	44.3052	8.15033	0	0	Null_Model_OpenChrom	human
Misc_ChIP	IB4	RBPJ	41723	273378	0.15262	9631.16	724.388	44.302	4.33208	0	0	Null_Model_OpenChrom	human
TxnFactorChIPV3	A549+DEX_100nM	USF1	47110	273378	0.172325	11934	794.071	44.2983	3.94755	0	0	Null_Model_OpenChrom	human
Cistrome_ChIP	U87	MAX	146113	273378	0.534472	72103.1	1670.74	44.2976	2.02644	0	0	Null_Model_OpenChrom	human
Misc_ChIP	LoVo	SP1	20726	273378	0.0758144	2918.45	402.007	44.2967	7.10172	0	0	Null_Model_OpenChrom	human
TxnFactorChIPV3	H1-hESC	SIX5	23110	273378	0.084535	3613.63	440.134	44.2964	6.39524	0	0	Null_Model_OpenChrom	human
Misc_ChIP	LoVo	RAD21	138596	273378	0.506976	66414.4	1629.52	44.2962	2.08684	0	0	Null_Model_OpenChrom	human
TxnFactorChIPV3	GM12878	CTCF	109348	273378	0.399988	46929.3	1409.17	44.2947	2.33006	0	0	Null_Model_OpenChrom	human
TxnFactorChIPV3	HeLa-S3	TFAP2C	70924	273378	0.259436	24047.2	1058.34	44.2928	2.94937	0	0	Null_Model_OpenChrom	human
ReMap_ChIP	cd34_nont8_21	RUNX1	74114	273378	0.271104	25269.1	1102.83	44.2906	2.93299	0	0	Null_Model_OpenChrom	human
TxnFactorChIPV3	HUVEC	MYC	32958	273378	0.120558	6527.36	596.763	44.29	5.04921	0	0	Null_Model_OpenChrom	human
ReMap_ChIP	bt474	TFAP2C	123780	273378	0.45278	55655.5	1538.15	44.2899	2.22404	0	0	Null_Model_OpenChrom	human
TxnFactorChIPV3	H1-hESC	GABPA	35191	273378	0.128727	7534.72	624.456	44.2886	4.67051	0	0	Null_Model_OpenChrom	human
ReMap_ChIP	cd34+nr29_normal	ERG	92458	273378	0.338206	36730.5	1258.28	44.2885	2.5172	0	0	Null_Model_OpenChrom	human
TxnFactorChIPV3	H1-hESC	EGR1	46272	273378	0.16926	11524	784.612	44.2869	4.01528	0	0	Null_Model_OpenChrom	human
Misc_ChIP	LoVo	USF2	29583	273378	0.108213	5614.2	541.224	44.2863	5.26932	0	0	Null_Model_OpenChrom	human
Misc_ChIP	LoVo	SP2	31362	273378	0.11472	6120.96	569.971	44.2848	5.12371	0	0	Null_Model_OpenChrom	human
TxnFactorChIPV3	HepG2	RCOR1	31806	273378	0.116344	6559.61	570.093	44.2847	4.84876	0	0	Null_Model_OpenChrom	human
Pazar_Chip	HCT116	SP1	95089	273378	0.34783	36561.2	1321.65	44.2839	2.60081	0	0	Null_Model_OpenChrom	human
ReMap_ChIP	caco2_diff	CDX2	54380	273378	0.198919	15415.4	879.889	44.2836	3.52765	0	0	Null_Model_OpenChrom	human
TxnFactorChIPV3	K562	TEAD4	71747	273378	0.262446	23684.5	1085.36	44.2824	3.02928	0	0	Null_Model_OpenChrom	human
Cistrome_ChIP	SKNO-1	EP300	32506	273378	0.118905	6718.34	582.367	44.2808	4.83839	0	0	Null_Model_OpenChrom	human
Cistrome_ChIP	MCF-10A	MYC	109874	273378	0.401912	46139.7	1439.33	44.2806	2.38133	0	0	Null_Model_OpenChrom	human
Artem-ChIP	Naive_CD4_Tcell_EI_5h_3	NFATC1	39065	273378	0.142897	9134.15	675.964	44.2788	4.27681	0	0	Null_Model_OpenChrom	human
TxnFactorChIPV3	HepG2+insulin	SREBP1	22402	273378	0.0819451	3477.49	427.428	44.2753	6.44199	0	0	Null_Model_OpenChrom	human
ReMap_ChIP	hct116	SP1	103704	273378	0.379343	43280.1	1364.75	44.2746	2.39611	0	0	Null_Model_OpenChrom	human
ReMap_ChIP	lcl_bcbl1	CTCF	93583	273378	0.342321	36814.1	1282.26	44.2724	2.54204	0	0	Null_Model_OpenChrom	human
Misc_ChIP	LoVo	JUN	54575	273378	0.199632	15792	876.109	44.2673	3.45585	0	0	Null_Model_OpenChrom	human
Misc_ChIP	Kasumi-1	RUNX1	37221	273378	0.136152	8648.24	645.473	44.2664	4.30388	0	0	Null_Model_OpenChrom	human
Cistrome_ChIP	HeLa	YY1	12831	273378	0.046935	1353.66	259.281	44.2661	9.47877	0	0	Null_Model_OpenChrom	human
Cistrome_ChIP	Plasma	MAX	18588	273378	0.0679938	2697.64	358.974	44.266	6.89046	0	0	Null_Model_OpenChrom	human
TxnFactorChIPV3	HepG2	USF1	62651	273378	0.229174	19804.1	968	44.2633	3.16354	0	0	Null_Model_OpenChrom	human
TxnFactorChIPV3	HepG2	ZBTB7A	42906	273378	0.156948	11088.8	718.872	44.2599	3.86931	0	0	Null_Model_OpenChrom	human
TxnFactorChIPV3	HepG2	BRCA1	15879	273378	0.0580844	2050.82	312.457	44.2563	7.74277	0	0	Null_Model_OpenChrom	human
TxnFactorChIPV3	GM12878	RCOR1	14385	273378	0.0526194	1709.35	286.416	44.2561	8.41547	0	0	Null_Model_OpenChrom	human
Misc_ChIP	LoVo	MEF2C	34079	273378	0.124659	7492.53	600.761	44.2546	4.5484	0	0	Null_Model_OpenChrom	human
ReMap_ChIP	nci_h2087	NKX2-1	44022	273378	0.16103	11442.3	736.241	44.2514	3.8473	0	0	Null_Model_OpenChrom	human
TxnFactorChIPV3	A549+EtOH_0.02pct	SIN3AK20	33124	273378	0.121166	7299.88	583.579	44.2513	4.53761	0	0	Null_Model_OpenChrom	human
TxnFactorChIPV3	GM12878	REST	32358	273378	0.118364	6849.79	576.452	44.2503	4.72394	0	0	Null_Model_OpenChrom	human
Misc_ChIP	LoVo	GATA4	44133	273378	0.161436	11696.4	733.047	44.249	3.77321	0	0	Null_Model_OpenChrom	human
Cistrome_ChIP	H1	GABPA	77673	273378	0.284123	27653.3	1130.52	44.2449	2.80882	0	0	Null_Model_OpenChrom	human
TxnFactorChIPV3	PBDE	GATA1	55751	273378	0.203934	16751.7	881.466	44.2437	3.32808	0	0	Null_Model_OpenChrom	human
Misc_ChIP	LoVo	ATF1	39319	273378	0.143826	9969.07	663.424	44.24	3.9441	0	0	Null_Model_OpenChrom	human
TxnFactorChIPV3	A549+EtOH_0.02pct	REST	44492	273378	0.162749	11671.3	741.893	44.2391	3.81208	0	0	Null_Model_OpenChrom	human
Misc_ChIP	PBMC	IRF5	39523	273378	0.144573	9987.49	667.635	44.239	3.95725	0	0	Null_Model_OpenChrom	human
Misc_ChIP	LoVo	ZNF407	51730	273378	0.189225	14955.2	831.343	44.2354	3.45899	0	0	Null_Model_OpenChrom	human
ReMap_ChIP	hspc	SPI1	52309	273378	0.191343	15400.4	834.373	44.2351	3.39659	0	0	Null_Model_OpenChrom	human
ReMap_ChIP	293T_gps2	NCOR1	32756	273378	0.119819	6934.25	583.79	44.2312	4.7238	0	0	Null_Model_OpenChrom	human
TxnFactorChIPV3	K562	CTCFL	44617	273378	0.163206	12261.9	731.522	44.2298	3.63866	0	0	Null_Model_OpenChrom	human
TxnFactorChIPV3	K562	TRIM28	40040	273378	0.146464	9991.56	679.409	44.2273	4.00738	0	0	Null_Model_OpenChrom	human
ReMap_ChIP	hela_s3	ZNF143	28188	273378	0.10311	5541.34	512.059	44.2267	5.08686	0	0	Null_Model_OpenChrom	human
ReMap_ChIP	keratinocyte_differentiated	TP63	126306	273378	0.46202	61149.3	1473.25	44.2264	2.06553	0	0	Null_Model_OpenChrom	human
TxnFactorChIPV3	HeLa-S3	USF2	44408	273378	0.162442	12040.7	731.881	44.2249	3.68817	0	0	Null_Model_OpenChrom	human
ReMap_ChIP	mm1s_jq1_50nm	BRD4	26385	273378	0.0965147	5110.37	481.055	44.2249	5.16303	0	0	Null_Model_OpenChrom	human
Cistrome_ChIP	K562	SP1	14993	273378	0.0548435	1909.93	295.835	44.2243	7.85002	0	0	Null_Model_OpenChrom	human
ReMap_ChIP	hela	GATAD1	11885	273378	0.0434746	1247.33	240.567	44.2191	9.52836	0	0	Null_Model_OpenChrom	human
Artem-ChIP	Naive_CD4_T_cells+EI12h	FOS	39119	273378	0.143095	9881.78	661.199	44.2185	3.9587	0	0	Null_Model_OpenChrom	human
Misc_ChIP	LoVo	NFYA	26728	273378	0.0977694	5207.78	486.688	44.2177	5.13232	0	0	Null_Model_OpenChrom	human
TxnFactorChIPV3	H1-hESC	BACH1	44377	273378	0.162328	12314.1	725.125	44.2171	3.60377	0	0	Null_Model_OpenChrom	human
ReMap_ChIP	cd4	CTCF	63163	273378	0.231046	21580.8	940.441	44.2157	2.92682	0	0	Null_Model_OpenChrom	human
Pazar_Chip	MCF7+ETOH	TFAP2C	77212	273378	0.282437	29284.8	1083.97	44.2146	2.63659	0	0	Null_Model_OpenChrom	human
ReMap_ChIP	aplpz74_leukemia	ERG	91358	273378	0.334182	38252.4	1201.11	44.2138	2.38829	0	0	Null_Model_OpenChrom	human
TxnFactorChIPV3	HEK293-T-REx	ZNF263	77443	273378	0.283282	28907	1097.78	44.2128	2.67904	0	0	Null_Model_OpenChrom	human
TxnFactorChIPV3	H1-hESC	BRCA1	17334	273378	0.0634067	2551.13	334.363	44.212	6.79464	0	0	Null_Model_OpenChrom	human
TxnFactorChIPV3	HepG2	ATF3	23018	273378	0.0841984	3955.58	431.189	44.2089	5.81912	0	0	Null_Model_OpenChrom	human
Cistrome_ChIP	H929	IRF4	32225	273378	0.117877	7191.32	566.301	44.2056	4.4811	0	0	Null_Model_OpenChrom	human
TxnFactorChIPV3	GM12873	CTCF	94407	273378	0.345335	40264.2	1224.85	44.2037	2.34469	0	0	Null_Model_OpenChrom	human
ReMap_ChIP	k562	ZNF143	21982	273378	0.0804088	3789.34	411.574	44.2026	5.80101	0	0	Null_Model_OpenChrom	human
Cistrome_ChIP	H54	MYC	14163	273378	0.0518074	1810.33	279.503	44.1951	7.82345	0	0	Null_Model_OpenChrom	human
TxnFactorChIPV3	GM12878	RAD21	78999	273378	0.288974	31535.5	1073.98	44.1942	2.50508	0	0	Null_Model_OpenChrom	human
TxnFactorChIPV3	H1-hESC	EP300	37665	273378	0.137776	9715.81	632.447	44.1921	3.87667	0	0	Null_Model_OpenChrom	human
TxnFactorChIPV3	K562	NR2F2	49315	273378	0.180391	14541.8	786.883	44.1911	3.39127	0	0	Null_Model_OpenChrom	human
TxnFactorChIPV3	HeLa-S3+IFNg30	STAT1	48317	273378	0.176741	14657.6	761.679	44.1911	3.29638	0	0	Null_Model_OpenChrom	human
TxnFactorChIPV3	HEK293	ELK4	12756	273378	0.0466607	1564.75	253.256	44.1895	8.1521	0	0	Null_Model_OpenChrom	human
TxnFactorChIPV3	A549+EtOH_0.02pct	ZBTB33	32714	273378	0.119666	7652.54	567.142	44.189	4.27492	0	0	Null_Model_OpenChrom	human
TxnFactorChIPV3	K562	REST	48235	273378	0.176441	14139.6	771.593	44.1883	3.41134	0	0	Null_Model_OpenChrom	human
ReMap_ChIP	mm1s_jq1_5nm	BRD4	25150	273378	0.0919972	5056.13	454.737	44.1879	4.97416	0	0	Null_Model_OpenChrom	human
Misc_ChIP	IB4	EBNA2	27798	273378	0.101683	5937.39	494.727	44.1872	4.68186	0	0	Null_Model_OpenChrom	EBV
TxnFactorChIPV3	HeLa-S3	TCF7L2	56588	273378	0.206995	18256.8	867.484	44.1867	3.09956	0	0	Null_Model_OpenChrom	human
ReMap_ChIP	mdamd453	TFAP2C	74858	273378	0.273826	28450.4	1050.28	44.1858	2.63118	0	0	Null_Model_OpenChrom	human
Cistrome_ChIP	EmbryonicStemCell	YY1	27221	273378	0.0995728	5588.05	489.597	44.1852	4.87129	0	0	Null_Model_OpenChrom	human
ReMap_ChIP	skbr3	TFAP2C	121673	273378	0.445072	59461.5	1408	44.1843	2.04625	0	0	Null_Model_OpenChrom	human
Cistrome_ChIP	OCI-Ly10	BATF	30089	273378	0.110064	6825.2	526.518	44.1842	4.40851	0	0	Null_Model_OpenChrom	human
ReMap_ChIP	hpball	ZNF143	14602	273378	0.0534132	1877.51	287.991	44.1836	7.77731	0	0	Null_Model_OpenChrom	human
Cistrome_ChIP	VCaP+JQ1	BRD4	46254	273378	0.169194	13744.1	735.8	44.183	3.36536	0	0	Null_Model_OpenChrom	human
TxnFactorChIPV3	H1-hESC	MAX	42812	273378	0.156604	11783.1	702.311	44.1811	3.63333	0	0	Null_Model_OpenChrom	human
TxnFactorChIPV3	K562	FOS	47216	273378	0.172713	13665.3	759.428	44.1789	3.45518	0	0	Null_Model_OpenChrom	human
TxnFactorChIPV3	MCF-7+serum_starved_media	MYC	31033	273378	0.113517	7005.16	543.909	44.1762	4.43002	0	0	Null_Model_OpenChrom	human
Pazar_Chip	hESC	NANOG	108395	273378	0.396502	50167.1	1318.1	44.1756	2.16068	0	0	Null_Model_OpenChrom	human
TxnFactorChIPV3	H1-hESC	ZNF143	70438	273378	0.257658	26497	994.739	44.1734	2.65833	0	0	Null_Model_OpenChrom	human
Cistrome_ChIP	FB8470	MYC	16603	273378	0.0607328	2595.04	317.142	44.1693	6.39798	0	0	Null_Model_OpenChrom	human
Cistrome_ChIP	LoVo	ETV7	19343	273378	0.0707555	3169.94	366.166	44.1687	6.102	0	0	Null_Model_OpenChrom	human
Cistrome_ChIP	CD4+	KAT8	11834	273378	0.043288	1355.31	237.25	44.1673	8.73161	0	0	Null_Model_OpenChrom	human
TxnFactorChIPV3	HeLa-S3	TFAP2A	56715	273378	0.20746	18722.4	860.214	44.1665	3.02926	0	0	Null_Model_OpenChrom	human
TxnFactorChIPV3	PANC-1	TCF7L2	42779	273378	0.156483	12480.7	686.004	44.1664	3.42761	0	0	Null_Model_OpenChrom	human
Cistrome_ChIP	NCI-H441	SMAD3	80425	273378	0.29419	32424.8	1086.81	44.1661	2.48035	0	0	Null_Model_OpenChrom	human
Misc_ChIP	LoVo	H3K4me1	75121	273378	0.274788	29810.4	1025.92	44.166	2.51996	0	0	Null_Model_OpenChrom	human
Cistrome_ChIP	LoVo	SP2	10582	273378	0.0387083	1132.46	213.991	44.1585	9.34428	0	0	Null_Model_OpenChrom	human
ReMap_ChIP	keratinocyte_progenitor	TP63	92508	273378	0.338389	41060.6	1165.1	44.1571	2.25296	0	0	Null_Model_OpenChrom	human
TxnFactorChIPV3	K562	RFX5	15920	273378	0.0582344	2412.5	305.915	44.1544	6.59896	0	0	Null_Model_OpenChrom	human
TxnFactorChIPV3	H1-hESC	ATF2	29361	273378	0.107401	6638.82	514.617	44.1535	4.42262	0	0	Null_Model_OpenChrom	human
TxnFactorChIPV3	GM12878	SMC3	63504	273378	0.232294	23818	898.825	44.1533	2.66622	0	0	Null_Model_OpenChrom	human
TxnFactorChIPV3	GM12865	CTCF	85005	273378	0.310943	35705.6	1116.55	44.1533	2.38072	0	0	Null_Model_OpenChrom	human
TxnFactorChIPV3	GM12864	CTCF	87435	273378	0.319832	37400.9	1133.25	44.1509	2.33778	0	0	Null_Model_OpenChrom	human
Cistrome_ChIP	GM12878	NFYA	10526	273378	0.0385035	1153.51	212.288	44.1499	9.12517	0	0	Null_Model_OpenChrom	human
TxnFactorChIPV3	HepG2	JUND	75398	273378	0.275801	30569.3	1015.38	44.1498	2.46647	0	0	Null_Model_OpenChrom	human
TxnFactorChIPV3	HepG2	ZBTB33	19074	273378	0.0697715	3230.94	358.875	44.1465	5.90354	0	0	Null_Model_OpenChrom	human
TxnFactorChIPV3	HepG2	SRF	25230	273378	0.0922898	5188.16	454.023	44.1428	4.86299	0	0	Null_Model_OpenChrom	human
Cistrome_ChIP	Neuroectoderm	EP300	45559	273378	0.166652	14097.6	712.851	44.1346	3.23168	0	0	Null_Model_OpenChrom	human
ReMap_ChIP	293trex	ZNF143	15494	273378	0.0566761	2389.49	296.927	44.1338	6.48422	0	0	Null_Model_OpenChrom	human
Misc_ChIP	LoVo	SP3	30909	273378	0.113063	7717.66	525.497	44.1322	4.00497	0	0	Null_Model_OpenChrom	human
TxnFactorChIPV3	PFSK-1	SIN3AK20	28022	273378	0.102503	6502.22	487.635	44.1309	4.30961	0	0	Null_Model_OpenChrom	human
Misc_ChIP	LoVo	ARNT	29164	273378	0.10668	6760.69	507.656	44.1309	4.31376	0	0	Null_Model_OpenChrom	human
Misc_ChIP	LoVo	ZFHX3	27723	273378	0.101409	6329.81	484.773	44.1303	4.37975	0	0	Null_Model_OpenChrom	human
TxnFactorChIPV3	GM12872	CTCF	87057	273378	0.318449	37393.4	1125.52	44.1251	2.32814	0	0	Null_Model_OpenChrom	human
TxnFactorChIPV3	K562	ZBTB33	20877	273378	0.0763668	3763.86	387.841	44.1241	5.54671	0	0	Null_Model_OpenChrom	human
TxnFactorChIPV3	A549	BHLHE40	21846	273378	0.0799113	4126.91	401.581	44.1233	5.29355	0	0	Null_Model_OpenChrom	human
TxnFactorChIPV3	GM12878	ATF3	14197	273378	0.0519318	2068.88	274.893	44.1194	6.86216	0	0	Null_Model_OpenChrom	human
TxnFactorChIPV3	HepG2	NFIC	45220	273378	0.165412	13786.5	712.494	44.1176	3.28002	0	0	Null_Model_OpenChrom	human
TxnFactorChIPV3	H1-hESC	USF2	31193	273378	0.114102	7612.05	534.534	44.115	4.09785	0	0	Null_Model_OpenChrom	human
ReMap_ChIP	huvec	RELA	24586	273378	0.0899341	5247.17	438.404	44.1119	4.68557	0	0	Null_Model_OpenChrom	human
TxnFactorChIPV3	A549+DEX_100nM	NR3C1	51345	273378	0.187817	17048.5	777.562	44.1077	3.0117	0	0	Null_Model_OpenChrom	human
Misc_ChIP	Kasumi-1_siMM	RUNX1	29497	273378	0.107898	7113.18	507.481	44.1077	4.14681	0	0	Null_Model_OpenChrom	human
TxnFactorChIPV3	K562	USF2	18803	273378	0.0687802	3368.43	349.943	44.1059	5.58213	0	0	Null_Model_OpenChrom	human
TxnFactorChIPV3	GM06990	CTCF	83054	273378	0.303806	36109.9	1064.51	44.0992	2.30003	0	0	Null_Model_OpenChrom	human
Cistrome_ChIP	CD133+	SPI1	40018	273378	0.146383	11528.9	646.032	44.0986	3.47111	0	0	Null_Model_OpenChrom	human
Misc_ChIP	LoVo	BARX2	16773	273378	0.0613546	2805.66	316.742	44.0969	5.97827	0	0	Null_Model_OpenChrom	human
Misc_ChIP	LoVo	MYB	31433	273378	0.11498	7923.83	533.135	44.096	3.96689	0	0	Null_Model_OpenChrom	human
ReMap_ChIP	mcf7_xeno	ESR1	82680	273378	0.302438	35968.9	1059.45	44.0901	2.29865	0	0	Null_Model_OpenChrom	human
ReMap_ChIP	abl	AR	67041	273378	0.245232	26538.5	918.658	44.0888	2.52618	0	0	Null_Model_OpenChrom	human
TxnFactorChIPV3	A549+EtOH_0.02pct	TCF12	51598	273378	0.188742	17676.5	769.421	44.0871	2.91902	0	0	Null_Model_OpenChrom	human
Misc_ChIP	LoVo	FEV	30060	273378	0.109958	7634.97	508.676	44.0851	3.93715	0	0	Null_Model_OpenChrom	human
ReMap_ChIP	jurkat	RUNX1	30789	273378	0.112624	7245.09	534.075	44.0836	4.24963	0	0	Null_Model_OpenChrom	human
ReMap_ChIP	k562	PRAME	31573	273378	0.115492	8082.9	532.869	44.0823	3.90615	0	0	Null_Model_OpenChrom	human
Misc_ChIP	LoVo	ZNF706	39532	273378	0.144606	11787.9	629.374	44.082	3.3536	0	0	Null_Model_OpenChrom	human
ReMap_ChIP	mcf7_e2	TFAP2C	77115	273378	0.282082	32869.3	1003.73	44.0811	2.34611	0	0	Null_Model_OpenChrom	human
TxnFactorChIPV3	GM12875	CTCF	76048	273378	0.278179	32613.5	985.36	44.0799	2.3318	0	0	Null_Model_OpenChrom	human
ReMap_ChIP	kasumi1_leukemic	RUNX1T1	39062	273378	0.142886	11707.9	620.619	44.0756	3.33638	0	0	Null_Model_OpenChrom	human
ReMap_ChIP	mcf10a	SNAPC1	13870	273378	0.0507356	2027.12	268.713	44.0726	6.84223	0	0	Null_Model_OpenChrom	human
ReMap_ChIP	mcf7_etoh	TFAP2C	73551	273378	0.269045	30573.2	975.18	44.0716	2.40573	0	0	Null_Model_OpenChrom	human
ReMap_ChIP	mcf7	KLF4	40327	273378	0.147514	12290.1	636.264	44.0649	3.28126	0	0	Null_Model_OpenChrom	human
Misc_ChIP	Kasumi-1	RUNX1-ETO	32575	273378	0.119157	8887.71	537.598	44.0614	3.66517	0	0	Null_Model_OpenChrom	human
TxnFactorChIPV3	HeLa-S3	ZKSCAN1	23572	273378	0.0862249	4903.85	423.688	44.061	4.80683	0	0	Null_Model_OpenChrom	human
Misc_ChIP	LoVo	NFKB2	21639	273378	0.0791541	4482.4	389.385	44.0608	4.82754	0	0	Null_Model_OpenChrom	human
Cistrome_ChIP	K562	SPI1	61860	273378	0.22628	24183.2	855.23	44.0546	2.55798	0	0	Null_Model_OpenChrom	human
TxnFactorChIPV3	H1-hESC	USF1	58595	273378	0.214337	21258.1	847.526	44.0541	2.75637	0	0	Null_Model_OpenChrom	human
Misc_ChIP	GM12878	EBNA2	29500	273378	0.107909	7193.85	506.347	44.0531	4.10073	0	0	Null_Model_OpenChrom	EBV
Misc_ChIP	LoVo	RFX2	30172	273378	0.110367	7924.58	505.015	44.0529	3.80739	0	0	Null_Model_OpenChrom	human
ReMap_ChIP	helab2_p65kd_ta_tnfa	RELA	23403	273378	0.0856067	4984.82	418.097	44.0525	4.69485	0	0	Null_Model_OpenChrom	human
TxnFactorChIPV3	GM12874	CTCF	74085	273378	0.270998	31430.5	968.38	44.0473	2.3571	0	0	Null_Model_OpenChrom	human
Pazar_Chip	H9	FOXP1	23052	273378	0.0843228	5055.32	408.599	44.0449	4.55995	0	0	Null_Model_OpenChrom	human
TxnFactorChIPV3	NHEK	POLR2A	29160	273378	0.106665	7229.06	497.968	44.0409	4.03372	0	0	Null_Model_OpenChrom	human
ReMap_ChIP	293t	TBL1	67774	273378	0.247913	27314.6	918.812	44.0344	2.48123	0	0	Null_Model_OpenChrom	human
Misc_ChIP	LoVo	H3	120400	273378	0.440416	65050.1	1257.15	44.0282	1.85088	0	0	Null_Model_OpenChrom	human
ReMap_ChIP	mcf7	TFAP2C	118673	273378	0.434099	63283.7	1258.04	44.0281	1.87525	0	0	Null_Model_OpenChrom	human
ReMap_ChIP	germ_bcell	BCOR	19790	273378	0.0723906	3957.16	359.608	44.0281	5.00106	0	0	Null_Model_OpenChrom	human
ReMap_ChIP	hepg2	STAG1	77566	273378	0.283732	33891.8	991.996	44.0266	2.28863	0	0	Null_Model_OpenChrom	human
ReMap_ChIP	mcf7_untreat	STAG1	89085	273378	0.325867	41973.6	1070.16	44.0227	2.12241	0	0	Null_Model_OpenChrom	human
Cistrome_ChIP	CD4+	POLR3A	15041	273378	0.0550191	2533.87	284.147	44.0164	5.93598	0	0	Null_Model_OpenChrom	human
TxnFactorChIPV3	K562	CTCF	100848	273378	0.368896	50386.4	1146.63	44.0088	2.00149	0	0	Null_Model_OpenChrom	human
Artem-ChIP	Naive_CD4_Tcell_EI_5h_2	NFKB1	15865	273378	0.0580332	2635.35	300.622	44.0077	6.02007	0	0	Null_Model_OpenChrom	human
Pazar_Chip	Caco-2_differentiated	CDX2	159954	273378	0.585102	98007.4	1407.72	44.0051	1.63206	0	0	Null_Model_OpenChrom	human
Pazar_Chip	CD34	GATA1	60408	273378	0.220969	23700.5	834.169	44.0048	2.5488	0	0	Null_Model_OpenChrom	human
ReMap_ChIP	liver	FOXA1	77945	273378	0.285118	34288.7	992.083	44.0047	2.2732	0	0	Null_Model_OpenChrom	human
TxnFactorChIPV3	H1-hESC	SRF	21512	273378	0.0786896	4658.51	383.023	44.0012	4.61779	0	0	Null_Model_OpenChrom	human
Cistrome_ChIP	HeLa	MYC	18199	273378	0.0665708	3568.12	332.522	43.9997	5.10044	0	0	Null_Model_OpenChrom	human
ReMap_ChIP	mdamb23_thiostrepton	FOXM1	37552	273378	0.137363	11614.9	589.502	43.9982	3.23308	0	0	Null_Model_OpenChrom	human
TxnFactorChIPV3	K562+IFNa30	JUN	31075	273378	0.11367	8476.41	513.637	43.9972	3.66606	0	0	Null_Model_OpenChrom	human
Misc_ChIP	LoVo	ETV4	28542	273378	0.104405	7404.86	480.488	43.9909	3.85449	0	0	Null_Model_OpenChrom	human
Misc_ChIP	Kasumi-1_siRE	RUNX1	32281	273378	0.118082	9079.58	527.436	43.9891	3.55534	0	0	Null_Model_OpenChrom	human
ReMap_ChIP	mcf7_e2	STAG1	89727	273378	0.328216	42336.4	1077.34	43.9885	2.11938	0	0	Null_Model_OpenChrom	human
TxnFactorChIPV3	K562+IFNa30	STAT2	16724	273378	0.0611754	3219.8	307.027	43.9838	5.19411	0	0	Null_Model_OpenChrom	human
Cistrome_ChIP	OCI-Ly3+SCRM	IRF4	20712	273378	0.0757632	4277.76	373.651	43.9828	4.84178	0	0	Null_Model_OpenChrom	human
Pazar_Chip	HepG2	HNF4A	63019	273378	0.23052	25814.5	845.922	43.981	2.44122	0	0	Null_Model_OpenChrom	human
TxnFactorChIPV3	AG04449	CTCF	86200	273378	0.315314	41137	1024.65	43.9789	2.09544	0	0	Null_Model_OpenChrom	human
TxnFactorChIPV3	HepG2	USF2	25962	273378	0.0949674	6413.07	444.575	43.9721	4.04829	0	0	Null_Model_OpenChrom	human
ReMap_ChIP	esc	NANOG	94428	273378	0.345412	46608.2	1087.55	43.9703	2.02599	0	0	Null_Model_OpenChrom	human
Misc_ChIP	LoVo	ZBTB7B	27805	273378	0.101709	7182.75	469.013	43.9695	3.87108	0	0	Null_Model_OpenChrom	human
Cistrome_ChIP	HaematopoieticProgenitorCell	SPI1	29480	273378	0.107836	8211.8	483.712	43.9688	3.58996	0	0	Null_Model_OpenChrom	human
Pazar_Chip	HepG2	STAG1	79683	273378	0.291476	36668.5	978.568	43.9566	2.17306	0	0	Null_Model_OpenChrom	human
Cistrome_ChIP	K562	IRF1	15266	273378	0.0558421	2753.14	284.677	43.9546	5.54495	0	0	Null_Model_OpenChrom	human
TxnFactorChIPV3	HepG2	EP300	56622	273378	0.20712	22764.8	770.362	43.9497	2.48726	0	0	Null_Model_OpenChrom	human
Misc_ChIP	LoVo	SOX4	23132	273378	0.0846154	5602.05	398.901	43.9457	4.1292	0	0	Null_Model_OpenChrom	human
ReMap_ChIP	hesc	YY1	37683	273378	0.137842	12060.3	583.068	43.9445	3.12454	0	0	Null_Model_OpenChrom	human
Pazar_Chip	Caco-2_differentiated	HNF4	151915	273378	0.555696	94303.7	1311.12	43.9404	1.61091	0	0	Null_Model_OpenChrom	human
TxnFactorChIPV3	MCF-7+serum_stimulated_media	CTCF	96080	273378	0.351455	48423.9	1085.05	43.9207	1.98414	0	0	Null_Model_OpenChrom	human
ReMap_ChIP	erythroid	ATRX	22165	273378	0.0810782	5208.82	386.099	43.9166	4.25528	0	0	Null_Model_OpenChrom	human
TxnFactorChIPV3	HepG2	IRF3	8185	273378	0.0299402	911.337	165.641	43.9122	8.98131	0	0	Null_Model_OpenChrom	human
Misc_ChIP	LoVo	HOXA7	31225	273378	0.114219	9293.25	499.462	43.9107	3.35996	0	0	Null_Model_OpenChrom	human
Cistrome_ChIP	HEK293T	EP300	23599	273378	0.0863237	5921.97	402.585	43.9088	3.98499	0	0	Null_Model_OpenChrom	human
ReMap_ChIP	caco2_diff	HNF4A	66016	273378	0.241482	28943.4	844.315	43.9085	2.28087	0	0	Null_Model_OpenChrom	human
TxnFactorChIPV3	HepG2	FOSL2	53694	273378	0.196409	21446.9	734.451	43.9065	2.50358	0	0	Null_Model_OpenChrom	human
TxnFactorChIPV3	K562	JUN	32108	273378	0.117449	9470.61	515.594	43.9054	3.39028	0	0	Null_Model_OpenChrom	human
Pazar_Chip	VCS2	AR	74915	273378	0.274034	35180.9	905.077	43.9014	2.12942	0	0	Null_Model_OpenChrom	human
Pazar_Chip	VCaP	AR	78306	273378	0.286439	36698.1	947.79	43.8999	2.13379	0	0	Null_Model_OpenChrom	human
TxnFactorChIPV3	HeLa-S3	NR2C2	13564	273378	0.0496163	2419.92	253.888	43.8937	5.60514	0	0	Null_Model_OpenChrom	human
ReMap_ChIP	ls180_125	CTNNB1	29113	273378	0.106494	8496.13	469.723	43.8916	3.42662	0	0	Null_Model_OpenChrom	human
Cistrome_ChIP	IMR90	SPI1	182765	273378	0.668543	124044	1337.96	43.8884	1.47339	0	0	Null_Model_OpenChrom	human
TxnFactorChIPV3	AG09319	CTCF	81654	273378	0.298685	40392.7	940.329	43.8796	2.0215	0	0	Null_Model_OpenChrom	human
Pazar_Chip	MCF7	PBX1	59804	273378	0.218759	25661.9	778.19	43.8737	2.33046	0	0	Null_Model_OpenChrom	human
ReMap_ChIP	rwpe1	ERG	28273	273378	0.103421	8337.51	454.418	43.8703	3.39106	0	0	Null_Model_OpenChrom	human
TxnFactorChIPV3	HepG2+forskolin	GRp20	7005	273378	0.0256239	795.539	141.556	43.8657	8.80535	0	0	Null_Model_OpenChrom	human
Misc_ChIP	LoVo	ATF5	43401	273378	0.158758	15627.4	633.167	43.8645	2.77723	0	0	Null_Model_OpenChrom	human
ReMap_ChIP	esch9	FOXP1	22178	273378	0.0811258	5560.35	378.847	43.8637	3.9886	0	0	Null_Model_OpenChrom	human
TxnFactorChIPV3	HeLa-S3	SMC3	69981	273378	0.255986	31640.9	874.101	43.8623	2.21172	0	0	Null_Model_OpenChrom	human
Pazar_Chip	MCF7+oestrogen	STAG1	84005	273378	0.307285	41242.3	974.937	43.862	2.03687	0	0	Null_Model_OpenChrom	human
TxnFactorChIPV3	MCF-7+serum_starved_media	CTCF	88521	273378	0.323804	44701.2	999.06	43.8611	1.98028	0	0	Null_Model_OpenChrom	human
Cistrome_ChIP	OCI-Ly3	SPI1	8834	273378	0.0323142	1153.35	175.113	43.8611	7.65943	0	0	Null_Model_OpenChrom	human
ReMap_ChIP	ls180_veh	CTNNB1	31042	273378	0.11355	9705.82	486.485	43.8578	3.19829	0	0	Null_Model_OpenChrom	human
TxnFactorChIPV3	MCF10A-Er-Src+4OHTAM_1uM_4hr	MYC	53136	273378	0.194368	21564.1	719.893	43.8564	2.46409	0	0	Null_Model_OpenChrom	human
TxnFactorChIPV3	BJ	CTCF	77256	273378	0.282598	37069.7	916.389	43.853	2.08408	0	0	Null_Model_OpenChrom	human
TxnFactorChIPV3	Fibrobl	CTCF	82129	273378	0.300423	39810.7	965.068	43.85	2.06299	0	0	Null_Model_OpenChrom	human
Cistrome_ChIP	MCF-10A	STAT3	95198	273378	0.348228	49950.5	1032.06	43.8421	1.90585	0	0	Null_Model_OpenChrom	human
ReMap_ChIP	liver	HNF4A	72465	273378	0.265073	34173.1	873.407	43.8419	2.12052	0	0	Null_Model_OpenChrom	human
ReMap_ChIP	sem	MEIS1	31696	273378	0.115942	9985.5	495.245	43.8379	3.1742	0	0	Null_Model_OpenChrom	human
Pazar_Chip	U937+BIO	TCF7L2	22158	273378	0.0810526	5761.56	374.073	43.8322	3.84583	0	0	Null_Model_OpenChrom	human
ReMap_ChIP	cd4_ifng	STAT1	11038	273378	0.0403763	1759.08	211.694	43.8319	6.27488	0	0	Null_Model_OpenChrom	human
Cistrome_ChIP	Th1	TBX21	25887	273378	0.0946931	7577.96	417.782	43.8244	3.41609	0	0	Null_Model_OpenChrom	human
ReMap_ChIP	ls180_125	CDX2	60319	273378	0.220643	26382.9	774.445	43.8199	2.28629	0	0	Null_Model_OpenChrom	human
Misc_ChIP	LoVo	NR2F1	25793	273378	0.0943492	7301.03	422	43.8199	3.53279	0	0	Null_Model_OpenChrom	human
ReMap_ChIP	mcf7	CTCF	81731	273378	0.298967	40921.9	931.342	43.8176	1.99725	0	0	Null_Model_OpenChrom	human
TxnFactorChIPV3	K562	SETDB1	15771	273378	0.0576894	3342.7	283.713	43.8059	4.71805	0	0	Null_Model_OpenChrom	human
TxnFactorChIPV3	GM12878	BRCA1	6899	273378	0.0252361	775.001	139.816	43.8003	8.90192	0	0	Null_Model_OpenChrom	human
TxnFactorChIPV3	HMEC	CTCF	85289	273378	0.311982	43287.9	959.093	43.7926	1.97028	0	0	Null_Model_OpenChrom	human
Misc_ChIP	LoVo	CTCF	70364	273378	0.257387	33674.5	837.857	43.7897	2.08953	0	0	Null_Model_OpenChrom	human
ReMap_ChIP	cd34+hspc_adult	GATA1	54864	273378	0.200689	23538.2	715.374	43.7895	2.33085	0	0	Null_Model_OpenChrom	human
Misc_ChIP	LoVo	SMAD3	24890	273378	0.0910461	7106.72	406.116	43.7887	3.50232	0	0	Null_Model_OpenChrom	human
TxnFactorChIPV3	IMR90	CTCF	76861	273378	0.281153	37199.7	905.846	43.7838	2.06617	0	0	Null_Model_OpenChrom	human
Misc_ChIP	LoVo	CEBPG	19555	273378	0.071531	4932.6	333.982	43.7821	3.96444	0	0	Null_Model_OpenChrom	human
ReMap_ChIP	flp143ha_4hr	ZNF143	37461	273378	0.13703	13501.7	547.246	43.7816	2.77454	0	0	Null_Model_OpenChrom	human
TxnFactorChIPV3	SAEC	CTCF	73249	273378	0.26794	35125.8	870.786	43.7802	2.08533	0	0	Null_Model_OpenChrom	human
ReMap_ChIP	t47d_ru486	NR3C3	79810	273378	0.29194	39743.6	915.177	43.7799	2.00812	0	0	Null_Model_OpenChrom	human
ReMap_ChIP	saos	TP53	51122	273378	0.187001	21220.9	683.08	43.7739	2.40904	0	0	Null_Model_OpenChrom	human
Pazar_Chip	MCF7+oestrogen	CTCF	79616	273378	0.29123	39478.8	916.926	43.7737	2.01668	0	0	Null_Model_OpenChrom	human
TxnFactorChIPV3	GM12878	STAT1	13507	273378	0.0494078	2454.22	252.51	43.7716	5.50358	0	0	Null_Model_OpenChrom	human
Misc_ChIP	LoVo	ETV7	14690	273378	0.0537351	3049.03	265.996	43.7637	4.81792	0	0	Null_Model_OpenChrom	human
Misc_ChIP	Kasumi-1_siMM	RUNX1-ETO	25820	273378	0.094448	7498.08	418.688	43.7603	3.44355	0	0	Null_Model_OpenChrom	human
TxnFactorChIPV3	HeLa-S3	REST	27081	273378	0.0990606	8201.96	431.435	43.7587	3.30177	0	0	Null_Model_OpenChrom	human
TxnFactorChIPV3	AoAF	CTCF	74970	273378	0.274236	36842.6	871.411	43.7537	2.03487	0	0	Null_Model_OpenChrom	human
Pazar_Chip	K562+BIO	GATA2	41220	273378	0.15078	15476.9	588.394	43.7514	2.66332	0	0	Null_Model_OpenChrom	human
ReMap_ChIP	nci_h3122	NKX2-1	57575	273378	0.210606	25863.7	724.808	43.7513	2.22609	0	0	Null_Model_OpenChrom	human
TxnFactorChIPV3	A549	CTCF	92094	273378	0.336874	48876.3	987.816	43.7508	1.88423	0	0	Null_Model_OpenChrom	human
TxnFactorChIPV3	NHDF-neo	CTCF	74967	273378	0.274225	37052.4	866.605	43.7507	2.02327	0	0	Null_Model_OpenChrom	human
Misc_ChIP	LoVo	HOXA2	21705	273378	0.0793956	5911.19	361.009	43.7491	3.67185	0	0	Null_Model_OpenChrom	human
Misc_ChIP	LoVo	LHX2	30435	273378	0.111329	9899.04	469.517	43.7385	3.07454	0	0	Null_Model_OpenChrom	human
Misc_ChIP	LoVo	AEBP2	13426	273378	0.0491115	2676.13	245.777	43.7383	5.01695	0	0	Null_Model_OpenChrom	human
TxnFactorChIPV3	A549+EtOH_0.02pct	BCL3	25426	273378	0.0930068	7693.69	405.44	43.736	3.30479	0	0	Null_Model_OpenChrom	human
TxnFactorChIPV3	Caco-2	CTCF	73529	273378	0.268965	36465.9	847.513	43.7316	2.01638	0	0	Null_Model_OpenChrom	human
Cistrome_ChIP	U937	SMAD1	56832	273378	0.207888	25570.3	715.098	43.7167	2.22258	0	0	Null_Model_OpenChrom	human
TxnFactorChIPV3	AG10803	CTCF	75040	273378	0.274492	37924.5	849.008	43.7164	1.97867	0	0	Null_Model_OpenChrom	human
Misc_ChIP	LoVo	ERM	42699	273378	0.15619	16688.5	594.991	43.7157	2.55858	0	0	Null_Model_OpenChrom	human
TxnFactorChIPV3	AG04450	CTCF	73947	273378	0.270494	37204.7	840.529	43.7133	1.98757	0	0	Null_Model_OpenChrom	human
TxnFactorChIPV3	HeLa-S3	SMARCC1	29425	273378	0.107635	9478.7	456.323	43.7109	3.10433	0	0	Null_Model_OpenChrom	human
TxnFactorChIPV3	K562+IFNg6h	STAT1	13283	273378	0.0485884	2553.66	245.467	43.7099	5.20155	0	0	Null_Model_OpenChrom	human
TxnFactorChIPV3	HCPEpiC	CTCF	87718	273378	0.320867	46881.9	934.304	43.7075	1.87104	0	0	Null_Model_OpenChrom	human
TxnFactorChIPV3	HCM	CTCF	79955	273378	0.29247	40845.5	894.882	43.7036	1.9575	0	0	Null_Model_OpenChrom	human
Pazar_Chip	PC3	ETS1	13635	273378	0.049876	2722.84	249.704	43.7004	5.00764	0	0	Null_Model_OpenChrom	human
TxnFactorChIPV3	NHLF	CTCF	71440	273378	0.261323	35144.3	830.617	43.6973	2.03276	0	0	Null_Model_OpenChrom	human
TxnFactorChIPV3	HUVEC	CTCF	76497	273378	0.279821	38956.7	859.124	43.696	1.96364	0	0	Null_Model_OpenChrom	human
ReMap_ChIP	mcf7_e2	CTCF	75052	273378	0.274536	37656.2	855.948	43.6893	1.99308	0	0	Null_Model_OpenChrom	human
Cistrome_ChIP	Saos-2	TP53	46090	273378	0.168594	19129.6	617.117	43.6876	2.40935	0	0	Null_Model_OpenChrom	human
ReMap_ChIP	plasma_jq1	BRD4	9921	273378	0.0362904	1645.28	189.455	43.6817	6.02998	0	0	Null_Model_OpenChrom	human
TxnFactorChIPV3	ProgFib	CTCF	71877	273378	0.262922	36439.6	811.274	43.6811	1.9725	0	0	Null_Model_OpenChrom	human
Cistrome_ChIP	LoVo	TP73	12966	273378	0.0474288	2661.67	235.925	43.6763	4.87138	0	0	Null_Model_OpenChrom	human
ReMap_ChIP	helas3_stim	STAT1	52081	273378	0.190509	22773.8	671.043	43.6741	2.28688	0	0	Null_Model_OpenChrom	human
ReMap_ChIP	mcf7_tam	CTCF	74828	273378	0.273716	38234.1	838.103	43.6628	1.9571	0	0	Null_Model_OpenChrom	human
Pazar_Chip	U937+BMP4	SMAD1	50169	273378	0.183515	21751.7	650.846	43.6621	2.30644	0	0	Null_Model_OpenChrom	human
Misc_ChIP	LoVo	TBX3	19019	273378	0.0695703	4899.24	323.399	43.6604	3.88203	0	0	Null_Model_OpenChrom	human
TxnFactorChIPV3	HBMEC	CTCF	85251	273378	0.311843	45894.4	901.789	43.6428	1.85755	0	0	Null_Model_OpenChrom	human
TxnFactorChIPV3	K562	ARID3A	23843	273378	0.0872162	7186.25	381.679	43.6407	3.31786	0	0	Null_Model_OpenChrom	human
ReMap_ChIP	bl41	CTCF	44649	273378	0.163323	18583.2	597.4	43.632	2.40265	0	0	Null_Model_OpenChrom	human
TxnFactorChIPV3	HPF	CTCF	71907	273378	0.263031	36848.9	803.535	43.6298	1.9514	0	0	Null_Model_OpenChrom	human
TxnFactorChIPV3	U2OS	KAP1	33758	273378	0.123485	11976	499.257	43.6288	2.8188	0	0	Null_Model_OpenChrom	human
TxnFactorChIPV3	Gliobla	CTCF	87210	273378	0.319009	48067.3	897.35	43.6203	1.81433	0	0	Null_Model_OpenChrom	human
TxnFactorChIPV3	HPAF	CTCF	81667	273378	0.298733	43657.6	871.577	43.6099	1.87063	0	0	Null_Model_OpenChrom	human
Cistrome_ChIP	HepG2	EP300	51497	273378	0.188373	22981.8	653.925	43.6062	2.24077	0	0	Null_Model_OpenChrom	human
ReMap_ChIP	wm853_2	SETDB1	14087	273378	0.0515294	3167.53	250.418	43.6049	4.44731	0	0	Null_Model_OpenChrom	human
ReMap_ChIP	tall_rpmi8402	TCF3	37419	273378	0.136876	14283.4	530.655	43.5983	2.61976	0	0	Null_Model_OpenChrom	human
TxnFactorChIPV3	K562	GATA2	43769	273378	0.160104	18225.4	585.899	43.5973	2.40154	0	0	Null_Model_OpenChrom	human
TxnFactorChIPV3	HVMF	CTCF	71546	273378	0.261711	36766.2	797.799	43.5946	1.94597	0	0	Null_Model_OpenChrom	human
Misc_ChIP	LoVo	NEUROG3	18639	273378	0.0681803	4900.4	315.163	43.5921	3.80357	0	0	Null_Model_OpenChrom	human
ReMap_ChIP	asc	CTCF	80941	273378	0.296077	43635.6	855.791	43.5917	1.85493	0	0	Null_Model_OpenChrom	human
ReMap_ChIP	mcf7_untreat	RAD21	79192	273378	0.289679	42670.1	838.069	43.5787	1.85591	0	0	Null_Model_OpenChrom	human
TxnFactorChIPV3	K562	RAD21	59111	273378	0.216224	28695.6	698.004	43.5748	2.05993	0	0	Null_Model_OpenChrom	human
TxnFactorChIPV3	MCF-7+vehicle	CTCF	98930	273378	0.36188	56920	964.259	43.5671	1.73805	0	0	Null_Model_OpenChrom	human
Cistrome_ChIP	H9	TP53	25092	273378	0.091785	7954.22	393.372	43.5663	3.15455	0	0	Null_Model_OpenChrom	human
TxnFactorChIPV3	K562	GTF3C2	10494	273378	0.0383864	1906.69	197.114	43.5651	5.50378	0	0	Null_Model_OpenChrom	human
Pazar_Chip	CD34+prog	SMAD1	37532	273378	0.13729	14868.2	520.232	43.5649	2.52432	0	0	Null_Model_OpenChrom	human
ReMap_ChIP	blood_macrophage	CEBPB	50610	273378	0.185128	22546.8	644.189	43.5636	2.24466	0	0	Null_Model_OpenChrom	human
TxnFactorChIPV3	MCF-7	CTCF	96111	273378	0.351568	55551.6	931.127	43.5595	1.73012	0	0	Null_Model_OpenChrom	human
TxnFactorChIPV3	HAc	CTCF	71612	273378	0.261952	36913.9	796.578	43.559	1.93998	0	0	Null_Model_OpenChrom	human
TxnFactorChIPV3	AG09309	CTCF	69222	273378	0.25321	35272.4	779.492	43.5535	1.9625	0	0	Null_Model_OpenChrom	human
ReMap_ChIP	caco2_prolif	HNF4A	39638	273378	0.144993	16227.2	537.585	43.5481	2.4427	0	0	Null_Model_OpenChrom	human
TxnFactorChIPV3	HEEpiC	CTCF	69794	273378	0.255302	35510.4	787.371	43.5419	1.96545	0	0	Null_Model_OpenChrom	human
ReMap_ChIP	germ_bcell	BCL6	8907	273378	0.0325813	1479.85	170.584	43.5394	6.01885	0	0	Null_Model_OpenChrom	human
Cistrome_ChIP	K562	STAT5A	34561	273378	0.126422	12953.7	496.282	43.5383	2.66804	0	0	Null_Model_OpenChrom	human
Pazar_Chip	Caco-2_proliferating	CDX2	133164	273378	0.487106	87750.3	1043.1	43.5373	1.51753	0	0	Null_Model_OpenChrom	human
TxnFactorChIPV3	T-47D+DMSO_0.02pct	FOXA1	57421	273378	0.210043	27453.4	688.449	43.5291	2.09158	0	0	Null_Model_OpenChrom	human
TxnFactorChIPV3	HEK293	KAP1	36360	273378	0.133003	13921.6	515.498	43.5277	2.61177	0	0	Null_Model_OpenChrom	human
TxnFactorChIPV3	HepG2	ARID3A	34539	273378	0.126342	13446.8	484.577	43.5271	2.56858	0	0	Null_Model_OpenChrom	human
TxnFactorChIPV3	HeLa-S3	CTCF	84208	273378	0.308028	46627	863.398	43.5269	1.80599	0	0	Null_Model_OpenChrom	human
Cistrome_ChIP	OCI-Ly3	BATF	11613	273378	0.0424796	2429.71	211.013	43.52	4.77957	0	0	Null_Model_OpenChrom	human
Misc_ChIP	LoVo	HINFP	78104	273378	0.2857	41429.8	842.858	43.5118	1.88522	0	0	Null_Model_OpenChrom	human
Pazar_Chip	CD34+prog	GATA2	47344	273378	0.173181	20893.7	607.966	43.5063	2.26595	0	0	Null_Model_OpenChrom	human
Cistrome_ChIP	EndothelialCell	RELA	21184	273378	0.0774898	6298.72	342.146	43.5056	3.36322	0	0	Null_Model_OpenChrom	human
TxnFactorChIPV3	HRE	CTCF	66512	273378	0.243297	34049.2	746.184	43.5051	1.95341	0	0	Null_Model_OpenChrom	human
TxnFactorChIPV3	HepG2	FOXA1	67203	273378	0.245824	35142.5	736.939	43.505	1.9123	0	0	Null_Model_OpenChrom	human
TxnFactorChIPV3	K562	STAT5A	25302	273378	0.0925532	8136.94	394.559	43.5044	3.10952	0	0	Null_Model_OpenChrom	human
Pazar_Chip	K562	EGR1	74694	273378	0.273226	39360.1	812.202	43.5038	1.89771	0	0	Null_Model_OpenChrom	human
ReMap_ChIP	mcf7_untreat	ESR1	50670	273378	0.185348	23793.9	617.87	43.498	2.12954	0	0	Null_Model_OpenChrom	human
Pazar_Chip	HepG2	CTCF	70140	273378	0.256568	36532.2	772.64	43.4974	1.91995	0	0	Null_Model_OpenChrom	human
ReMap_ChIP	ls180_125	NCOR1	35970	273378	0.131576	14221.3	500.074	43.491	2.52931	0	0	Null_Model_OpenChrom	human
TxnFactorChIPV3	HepG2	SP2	12061	273378	0.0441184	2571.39	218.199	43.4906	4.69045	0	0	Null_Model_OpenChrom	human
TxnFactorChIPV3	RPTEC	CTCF	78639	273378	0.287657	43255.5	813.753	43.4818	1.81801	0	0	Null_Model_OpenChrom	human
TxnFactorChIPV3	K562	BCL3	9346	273378	0.0341871	1759.69	174.494	43.4761	5.31116	0	0	Null_Model_OpenChrom	human
TxnFactorChIPV3	HepG2	MBD4	19370	273378	0.0708543	5576.47	317.31	43.4702	3.47352	0	0	Null_Model_OpenChrom	human
TxnFactorChIPV3	HRPEpiC	CTCF	76208	273378	0.278764	41264.7	803.902	43.4671	1.84681	0	0	Null_Model_OpenChrom	human
TxnFactorChIPV3	K562	TAL1	40968	273378	0.149858	17836.5	532.194	43.4645	2.29687	0	0	Null_Model_OpenChrom	human
TxnFactorChIPV3	HCFaa	CTCF	64758	273378	0.236881	33040.1	729.825	43.4596	1.95998	0	0	Null_Model_OpenChrom	human
TxnFactorChIPV3	K562	SMC3	44198	273378	0.161674	19817.6	561.053	43.4547	2.23024	0	0	Null_Model_OpenChrom	human
TxnFactorChIPV3	K562	JUNB	29087	273378	0.106398	10810.7	420.601	43.4528	2.69057	0	0	Null_Model_OpenChrom	human
ReMap_ChIP	ls180_veh	NCOR1	35559	273378	0.130073	14303.6	489.195	43.4497	2.48601	0	0	Null_Model_OpenChrom	human
Cistrome_ChIP	K562	EP300	15634	273378	0.0571882	4079.9	265.953	43.4441	3.83196	0	0	Null_Model_OpenChrom	human
Misc_ChIP	LoVo	CREB3L4	13820	273378	0.0505527	3293.4	242.351	43.4353	4.19627	0	0	Null_Model_OpenChrom	human
TxnFactorChIPV3	HepG2	CTCF	84335	273378	0.308492	47333.3	851.918	43.4334	1.78173	0	0	Null_Model_OpenChrom	human
TxnFactorChIPV3	NHDF-Ad	CTCF	71368	273378	0.26106	38424.4	758.575	43.4283	1.85736	0	0	Null_Model_OpenChrom	human
Misc_ChIP	LoVo	ESRRA	18965	273378	0.0693728	5448.33	311.274	43.4236	3.48088	0	0	Null_Model_OpenChrom	human
Pazar_Chip	Saos	Tp53	28563	273378	0.104482	10276.8	421.252	43.4091	2.77936	0	0	Null_Model_OpenChrom	human
TxnFactorChIPV3	K562	HDAC8	10092	273378	0.0369159	1994.99	186.532	43.4081	5.05867	0	0	Null_Model_OpenChrom	human
ReMap_ChIP	hepg2	CTCF	65320	273378	0.238937	34336.3	713.844	43.404	1.90236	0	0	Null_Model_OpenChrom	human
ReMap_ChIP	u87_dmso	BRD4	24821	273378	0.0907937	8526.02	375.506	43.3947	2.9112	0	0	Null_Model_OpenChrom	human
ReMap_ChIP	mcf7_e2	RAD21	72513	273378	0.265248	39415.5	762.722	43.3939	1.83971	0	0	Null_Model_OpenChrom	human
ReMap_ChIP	cd36_shbrg1	CTCF	57876	273378	0.211707	28433.4	678.617	43.3862	2.0355	0	0	Null_Model_OpenChrom	human
ReMap_ChIP	jurkat	TAL1	20736	273378	0.075851	6367.81	331.185	43.3842	3.25638	0	0	Null_Model_OpenChrom	human
Cistrome_ChIP	HEK293	BRD4	16982	273378	0.0621191	4712.17	282.917	43.3691	3.60386	0	0	Null_Model_OpenChrom	human
ReMap_ChIP	helab2_grkd_ta_tnfa	RELA	17499	273378	0.0640103	5092.29	286.079	43.3682	3.43637	0	0	Null_Model_OpenChrom	human
TxnFactorChIPV3	HMF	CTCF	73785	273378	0.269901	40939.1	757.443	43.3642	1.80231	0	0	Null_Model_OpenChrom	human
Pazar_Chip	U937+BIO	CEBPA	54197	273378	0.198249	26238.9	644.881	43.3539	2.06552	0	0	Null_Model_OpenChrom	human
TxnFactorChIPV3	HepG2	RXRA	35985	273378	0.131631	14634.6	492.503	43.3508	2.4589	0	0	Null_Model_OpenChrom	human
ReMap_ChIP	tall_prima5	TAL1	43333	273378	0.158509	19643.6	546.497	43.3477	2.20596	0	0	Null_Model_OpenChrom	human
Cistrome_ChIP	GM12878	YY1	5260	273378	0.0192408	692.417	105.384	43.3421	7.59658	0	0	Null_Model_OpenChrom	human
Misc_ChIP	LoVo	GATA6	20619	273378	0.075423	6500.93	325.738	43.3419	3.1717	0	0	Null_Model_OpenChrom	human
TxnFactorChIPV3	IMR90	RAD21	58298	273378	0.213251	29908.2	655.245	43.3271	1.94923	0	0	Null_Model_OpenChrom	human
TxnFactorChIPV3	WI-38	CTCF	53608	273378	0.196095	26515.7	625.33	43.3248	2.02175	0	0	Null_Model_OpenChrom	human
Cistrome_ChIP	IMR90	EP300	55613	273378	0.203429	27405.2	651.085	43.3242	2.02928	0	0	Null_Model_OpenChrom	human
TxnFactorChIPV3	K562	FOSL1	27325	273378	0.0999532	10205	395.168	43.3233	2.67761	0	0	Null_Model_OpenChrom	human
TxnFactorChIPV3	A549+EtOH_0.02pct	ATF3	20824	273378	0.0761729	6608.34	328.133	43.3229	3.15117	0	0	Null_Model_OpenChrom	human
Cistrome_ChIP	Lymphocyte	STAT5B	18524	273378	0.0677597	5659.12	296.996	43.3166	3.2733	0	0	Null_Model_OpenChrom	human
ReMap_ChIP	cd4_il12	STAT5B	20040	273378	0.0733051	6187.31	319.815	43.3146	3.23889	0	0	Null_Model_OpenChrom	human
ReMap_ChIP	fibro_wl38_a95	CTCF	38330	273378	0.140209	16683.4	499.917	43.3003	2.29749	0	0	Null_Model_OpenChrom	human
ReMap_ChIP	cd36_shluc	CTCF	55734	273378	0.203872	28060.4	639.228	43.2922	1.98621	0	0	Null_Model_OpenChrom	human
ReMap_ChIP	ls180_veh	NCOR2	22006	273378	0.0804966	7139.86	343.419	43.2886	3.08213	0	0	Null_Model_OpenChrom	human
ReMap_ChIP	flp76_4hr	ZNF76	33981	273378	0.1243	14022.3	461.115	43.2836	2.42336	0	0	Null_Model_OpenChrom	human
TxnFactorChIPV3	MCF-7+estrogen	CTCF	81019	273378	0.296363	47351.3	777.871	43.2819	1.71102	0	0	Null_Model_OpenChrom	human
TxnFactorChIPV3	GM12878	NFE2	6192	273378	0.02265	933.668	121.538	43.2648	6.63191	0	0	Null_Model_OpenChrom	human
ReMap_ChIP	lcl_hls554p	SMC1A	38403	273378	0.140476	17021	494.286	43.2584	2.25622	0	0	Null_Model_OpenChrom	human
TxnFactorChIPV3	HepG2	RAD21	73129	273378	0.267501	41166.1	738.896	43.2576	1.77644	0	0	Null_Model_OpenChrom	human
TxnFactorChIPV3	K562+IFNa6h	STAT1	8289	273378	0.0303207	1560.19	155.56	43.2555	5.31282	0	0	Null_Model_OpenChrom	human
TxnFactorChIPV3	HFF	CTCF	55882	273378	0.204413	28475.7	633.603	43.2546	1.96244	0	0	Null_Model_OpenChrom	human
TxnFactorChIPV3	T-47D+DMSO_0.02pct	EP300	29529	273378	0.108015	11512.7	416.53	43.2534	2.56491	0	0	Null_Model_OpenChrom	human
TxnFactorChIPV3	HeLa-S3	SMARCC2	12727	273378	0.0465546	3174.92	220.851	43.2513	4.00861	0	0	Null_Model_OpenChrom	human
Pazar_Chip	hESC	SMAD4	17053	273378	0.0623788	4999.46	278.715	43.2469	3.41097	0	0	Null_Model_OpenChrom	human
ReMap_ChIP	u937_bmp4	SMAD1	45135	273378	0.165101	21373.2	549.532	43.2402	2.11176	0	0	Null_Model_OpenChrom	human
TxnFactorChIPV3	HeLa-S3	MAFK	26090	273378	0.0954356	9972.16	372.814	43.2329	2.61628	0	0	Null_Model_OpenChrom	human
TxnFactorChIPV3	HFF-Myc	CTCF	64695	273378	0.23665	34918.2	688.809	43.2294	1.85276	0	0	Null_Model_OpenChrom	human
Cistrome_ChIP	HaematopoieticProgenitorCell	IKZF1	7290	273378	0.0266664	1254.88	139.613	43.2274	5.8093	0	0	Null_Model_OpenChrom	human
ReMap_ChIP	ls180_veh	CDX2	44854	273378	0.164073	21189.4	547.472	43.2252	2.11681	0	0	Null_Model_OpenChrom	human
Pazar_Chip	THP-1+unstimulated	VDR	8879	273378	0.0324788	1817.41	163.373	43.2236	4.88553	0	0	Null_Model_OpenChrom	human
TxnFactorChIPV3	HCT-116	CTCF	68048	273378	0.248915	37986.6	695.588	43.2172	1.79137	0	0	Null_Model_OpenChrom	human
Cistrome_ChIP	HCT-116	EP300	30408	273378	0.111231	12281.8	419.449	43.2143	2.47586	0	0	Null_Model_OpenChrom	human
Pazar_Chip	HepG2	RAD21	49143	273378	0.179762	24308.6	574.852	43.2014	2.02163	0	0	Null_Model_OpenChrom	human
TxnFactorChIPV3	HEK293	CTCF	66906	273378	0.244738	36744	698.223	43.1982	1.82087	0	0	Null_Model_OpenChrom	human
Cistrome_ChIP	H929	SPIB	4582	273378	0.0167607	560.986	93.1356	43.1737	8.16776	0	0	Null_Model_OpenChrom	human
ReMap_ChIP	asc	PPARG	55656	273378	0.203586	29343.9	609.59	43.1636	1.89668	0	0	Null_Model_OpenChrom	human
TxnFactorChIPV3	WERI-Rb-1	CTCF	71248	273378	0.260621	39953.7	725.617	43.1279	1.78327	0	0	Null_Model_OpenChrom	human
TxnFactorChIPV3	HepG2	HNF4G	37944	273378	0.138797	16841.8	489.317	43.1259	2.25297	0	0	Null_Model_OpenChrom	human
Misc_ChIP	LoVo	GATA1	16441	273378	0.0601402	4951.33	266.571	43.1018	3.32052	0	0	Null_Model_OpenChrom	human
TxnFactorChIPV3	K562	NR2C2	5252	273378	0.0192115	736.98	104.756	43.1003	7.12638	0	0	Null_Model_OpenChrom	human
Pazar_Chip	THP-1+stimulated	VDR	11064	273378	0.0404714	2626.9	195.802	43.09	4.2118	0	0	Null_Model_OpenChrom	human
TxnFactorChIPV3	GM12878	NR2C2	7294	273378	0.026681	1391.97	136.974	43.0887	5.24005	0	0	Null_Model_OpenChrom	human
TxnFactorChIPV3	T-47D+DMSO_0.02pct	CTCF	47492	273378	0.173723	23798.5	550.035	43.0764	1.99559	0	0	Null_Model_OpenChrom	human
Pazar_Chip	LS174T	TCF4	24646	273378	0.0901536	9715.99	346.623	43.0728	2.53664	0	0	Null_Model_OpenChrom	human
TxnFactorChIPV3	SK-N-SH_RA	RAD21	74322	273378	0.271865	44003.2	703.952	43.0695	1.68902	0	0	Null_Model_OpenChrom	human
ReMap_ChIP	liver	CEBPA	52329	273378	0.191416	27631	573.501	43.0654	1.89385	0	0	Null_Model_OpenChrom	human
Cistrome_ChIP	CD34+	LMO2	6316	273378	0.0231035	1068.42	121.859	43.0628	5.91152	0	0	Null_Model_OpenChrom	human
TxnFactorChIPV3	H1-hESC	TCF12	21520	273378	0.0787188	7593.43	323.433	43.0586	2.83403	0	0	Null_Model_OpenChrom	human
ReMap_ChIP	helab2_p65kd_dmso	NR3C1	15462	273378	0.0565591	4706.41	249.868	43.0451	3.2853	0	0	Null_Model_OpenChrom	human
Pazar_Chip	H1	Oct-4	16401	273378	0.0599939	5159.22	261.346	43.0149	3.17897	0	0	Null_Model_OpenChrom	human
Cistrome_ChIP	CD34+	TCF7L2	20726	273378	0.0758144	7475.97	308.107	43.0047	2.77235	0	0	Null_Model_OpenChrom	human
Cistrome_ChIP	LX2	VDR	42660	273378	0.156048	20822.2	507.872	42.9986	2.04877	0	0	Null_Model_OpenChrom	human
TxnFactorChIPV3	PFSK-1	REST	24214	273378	0.0885733	9431.34	343.877	42.9882	2.5674	0	0	Null_Model_OpenChrom	human
ReMap_ChIP	helab2_grkd_ta_tnfa	NR3C1	18190	273378	0.0665379	6170.08	279.612	42.9879	2.9481	0	0	Null_Model_OpenChrom	human
TxnFactorChIPV3	H1-hESC	CEBPB	26486	273378	0.0968842	10702.2	367.208	42.9832	2.47481	0	0	Null_Model_OpenChrom	human
ReMap_ChIP	helab2_wt_ta_tnfa	RELA	31109	273378	0.113795	13755.8	403.749	42.9802	2.26152	0	0	Null_Model_OpenChrom	human
ReMap_ChIP	cd4_il12	STAT4	6777	273378	0.0247899	1251.52	128.586	42.9712	5.415	0	0	Null_Model_OpenChrom	human
TxnFactorChIPV3	K562	HDAC6	6926	273378	0.0253349	1337.2	130.07	42.9675	5.17949	0	0	Null_Model_OpenChrom	human
TxnFactorChIPV3	K562	BACH1	11780	273378	0.0430905	3232.02	198.95	42.9655	3.64478	0	0	Null_Model_OpenChrom	human
ReMap_ChIP	rwpe1	GABPA	13783	273378	0.0504174	4032.01	227.033	42.9497	3.41839	0	0	Null_Model_OpenChrom	human
TxnFactorChIPV3	K562	ZNF263	13120	273378	0.0479922	3836.78	216.148	42.9484	3.41954	0	0	Null_Model_OpenChrom	human
TxnFactorChIPV3	HepG2+forskolin	HNF4A	26116	273378	0.0955307	10581.2	361.827	42.9342	2.46814	0	0	Null_Model_OpenChrom	human
ReMap_ChIP	ls180_125	NCOR2	21383	273378	0.0782177	7776.52	316.998	42.923	2.74969	0	0	Null_Model_OpenChrom	human
Pazar_Chip	hESC	EOMES	68225	273378	0.249563	39785.4	662.696	42.9149	1.71482	0	0	Null_Model_OpenChrom	human
TxnFactorChIPV3	H1-hESC	CTCF	82971	273378	0.303503	52060.3	720.321	42.9124	1.59375	0	0	Null_Model_OpenChrom	human
ReMap_ChIP	helab2_grkd_dmso	NR3C1	9568	273378	0.0349992	2327.52	168.929	42.8611	4.1108	0	0	Null_Model_OpenChrom	human
Pazar_Chip	hESC	CTCF	86192	273378	0.315285	55002	727.709	42.8605	1.56707	0	0	Null_Model_OpenChrom	human
TxnFactorChIPV3	A549+DEX_100nM	CTCF	56219	273378	0.205646	31151.1	585.011	42.8504	1.80472	0	0	Null_Model_OpenChrom	human
ReMap_ChIP	blood_monocyte	CEBPB	13475	273378	0.0492907	4001.26	221.089	42.8503	3.36769	0	0	Null_Model_OpenChrom	human
ReMap_ChIP	lncap	CTCF	53687	273378	0.196384	28985.5	576.492	42.8479	1.8522	0	0	Null_Model_OpenChrom	human
Misc_ChIP	BCells+Sendai_Virus	p65	5286	273378	0.0193359	897.059	102.445	42.8421	5.89259	0	0	Null_Model_OpenChrom	human
TxnFactorChIPV3	K562+IFNa6h	STAT2	8055	273378	0.0294647	1834.15	145.224	42.8361	4.39168	0	0	Null_Model_OpenChrom	human
TxnFactorChIPV3	HeLa-S3	GTF3C2	8829	273378	0.0322959	2174.96	155.464	42.8011	4.05939	0	0	Null_Model_OpenChrom	human
Cistrome_ChIP	T_Lymphocyte	STAT5	4647	273378	0.0169984	727.96	91.5766	42.7952	6.38359	0	0	Null_Model_OpenChrom	human
ReMap_ChIP	esc	CTCF	81439	273378	0.297899	51272.8	704.91	42.7945	1.58835	0	0	Null_Model_OpenChrom	human
ReMap_ChIP	hepg2	RAD21	42020	273378	0.153707	21112.7	488.763	42.7761	1.99028	0	0	Null_Model_OpenChrom	human
Misc_ChIP	LoVo	SMAD2	15265	273378	0.0558384	4936.86	241.488	42.7687	3.09204	0	0	Null_Model_OpenChrom	human
Cistrome_ChIP	Epithelial	RELA	30097	273378	0.110093	13508.1	388.079	42.7461	2.22807	0	0	Null_Model_OpenChrom	human
TxnFactorChIPV3	K562+IFNg30	JUN	20114	273378	0.0735758	7454.79	296.194	42.7396	2.69813	0	0	Null_Model_OpenChrom	human
Cistrome_ChIP	HeLa	RELA	30097	273378	0.110093	13508.9	388.162	42.7349	2.22793	0	0	Null_Model_OpenChrom	human
TxnFactorChIPV3	T-47D+DMSO_0.02pct	GATA3	44840	273378	0.164022	23704.7	494.652	42.7275	1.89161	0	0	Null_Model_OpenChrom	human
TxnFactorChIPV3	A549+EtOH_0.02pct	CTCF	54317	273378	0.198688	30201	564.471	42.7232	1.79852	0	0	Null_Model_OpenChrom	human
TxnFactorChIPV3	HepG2	FOXA2	49152	273378	0.179795	27290.7	511.708	42.7222	1.80105	0	0	Null_Model_OpenChrom	human
Pazar_Chip	megakaryocytes	GATA1	13328	273378	0.048753	4091.28	216.291	42.7051	3.25766	0	0	Null_Model_OpenChrom	human
TxnFactorChIPV3	H1-hESC	RFX5	7643	273378	0.0279576	1699.5	139.188	42.7012	4.4972	0	0	Null_Model_OpenChrom	human
ReMap_ChIP	hela_s3	ORC1	10807	273378	0.0395313	3032.59	182.103	42.6923	3.56362	0	0	Null_Model_OpenChrom	human
ReMap_ChIP	apl	REST	14239	273378	0.0520854	4531.75	227.392	42.6895	3.14206	0	0	Null_Model_OpenChrom	human
ReMap_ChIP	h3396_e2	RAC3	20834	273378	0.0762095	8355.75	292.444	42.6689	2.49337	0	0	Null_Model_OpenChrom	human
Pazar_Chip	U937+BMP4	CEBPA	23629	273378	0.0864334	9954.43	320.497	42.6668	2.37372	0	0	Null_Model_OpenChrom	human
ReMap_ChIP	nccit_snf5	POU5F1	29131	273378	0.106559	13141	374.942	42.6466	2.2168	0	0	Null_Model_OpenChrom	human
TxnFactorChIPV3	H1-hESC	TEAD4	34546	273378	0.126367	16683.7	418.861	42.6449	2.07064	0	0	Null_Model_OpenChrom	human
TxnFactorChIPV3	HeLa-S3	RAD21	53958	273378	0.197375	31354.9	530.355	42.6188	1.72088	0	0	Null_Model_OpenChrom	human
Misc_ChIP	LoVo	KLF3	10420	273378	0.0381157	2928.07	175.814	42.6129	3.55866	0	0	Null_Model_OpenChrom	human
ReMap_ChIP	293t	GPS2	33482	273378	0.122475	16267.4	404.073	42.6027	2.05823	0	0	Null_Model_OpenChrom	human
ReMap_ChIP	prec	CTCF	52196	273378	0.19093	30289.3	514.334	42.5923	1.72325	0	0	Null_Model_OpenChrom	human
ReMap_ChIP	cd36_shluc	GATA1	31666	273378	0.115832	15050.7	390.275	42.5732	2.10395	0	0	Null_Model_OpenChrom	human
Cistrome_ChIP	CD34+	LYL1	8050	273378	0.0294464	2003.09	142.114	42.5496	4.01879	0	0	Null_Model_OpenChrom	human
TxnFactorChIPV3	K562	MAFF	30028	273378	0.109841	14010	376.459	42.5491	2.14332	0	0	Null_Model_OpenChrom	human
ReMap_ChIP	cd36_shluc	TAL1	39925	273378	0.146043	20727.9	451.249	42.5422	1.92615	0	0	Null_Model_OpenChrom	human
TxnFactorChIPV3	HepG2+forskolin	PPARGC1A	6828	273378	0.0249764	1477.11	125.781	42.5413	4.62254	0	0	Null_Model_OpenChrom	human
Pazar_Chip	hESC	POU5F1	31241	273378	0.114278	14869	384.871	42.5389	2.10108	0	0	Null_Model_OpenChrom	human
TxnFactorChIPV3	K562+IFNa30	STAT1	6827	273378	0.0249727	1514.46	124.89	42.5379	4.50789	0	0	Null_Model_OpenChrom	human
ReMap_ChIP	fibrobj_post	KLF4	33616	273378	0.122965	16509.9	402.437	42.5063	2.03611	0	0	Null_Model_OpenChrom	human
Cistrome_ChIP	CD4+	INO80	20188	273378	0.0738465	8028.74	286.132	42.4953	2.51447	0	0	Null_Model_OpenChrom	human
TxnFactorChIPV3	HepG2	HNF4A	32945	273378	0.120511	16377.5	389.963	42.4849	2.01161	0	0	Null_Model_OpenChrom	human
Pazar_Chip	Caco-2_proliferating	HNF4	170141	273378	0.622365	134939	829.418	42.4424	1.26088	0	0	Null_Model_OpenChrom	human
Misc_ChIP	LoVo	NFIL3	10879	273378	0.0397947	3246.96	179.836	42.439	3.35052	0	0	Null_Model_OpenChrom	human
Misc_ChIP	BCells	IRF3	5958	273378	0.021794	1227.35	111.489	42.4315	4.85437	0	0	Null_Model_OpenChrom	human
ReMap_ChIP	cd36_shbrg1	TAL1	23298	273378	0.0852227	10248.8	307.611	42.4211	2.27324	0	0	Null_Model_OpenChrom	human
Misc_ChIP	LoVo	IRX3	8580	273378	0.0313851	2285.94	148.399	42.4132	3.75339	0	0	Null_Model_OpenChrom	human
ReMap_ChIP	k562_bmp	GATA2	27477	273378	0.100509	12708.9	348.197	42.413	2.16202	0	0	Null_Model_OpenChrom	human
TxnFactorChIPV3	K562+IFNg30	STAT1	8133	273378	0.02975	2088.11	142.582	42.3958	3.8949	0	0	Null_Model_OpenChrom	human
TxnFactorChIPV3	H1-hESC	FOSL1	6527	273378	0.0238754	1458.86	119.581	42.3826	4.47405	0	0	Null_Model_OpenChrom	human
TxnFactorChIPV3	A549+EtOH_0.02pct	EP300	30330	273378	0.110945	14514	373.193	42.3803	2.08971	0	0	Null_Model_OpenChrom	human
TxnFactorChIPV3	K562	MAFK	25989	273378	0.0950662	11818.4	334.476	42.3666	2.19904	0	0	Null_Model_OpenChrom	human
Pazar_Chip	CD34+prog	TCF7L2	20066	273378	0.0734002	8332.54	277.002	42.3587	2.40815	0	0	Null_Model_OpenChrom	human
TxnFactorChIPV3	A549	RAD21	37704	273378	0.137919	19820.5	422.303	42.3475	1.90227	0	0	Null_Model_OpenChrom	human
ReMap_ChIP	lclgm19193	NFKB1	3850	273378	0.0140831	623.12	76.2174	42.3378	6.17859	0	0	Null_Model_OpenChrom	human
ReMap_ChIP	helab2_p65kd_ta_tnfa	NR3C1	33800	273378	0.123638	16867.1	400.121	42.3193	2.0039	0	0	Null_Model_OpenChrom	human
Misc_ChIP	LoVo	TCF12	9143	273378	0.0334445	2561.18	155.551	42.3131	3.56984	0	0	Null_Model_OpenChrom	human
TxnFactorChIPV3	MCF10A-Er-Src+4OHTAM_1uM_36hr	STAT3	50803	273378	0.185834	29766.2	497.465	42.2879	1.70673	0	0	Null_Model_OpenChrom	human
ReMap_ChIP	hepg2	HNF4A	27672	273378	0.101222	13308.1	339.879	42.2619	2.07934	0	0	Null_Model_OpenChrom	human
TxnFactorChIPV3	HepG2	TEAD4	27041	273378	0.0989143	12453.1	345.202	42.2589	2.17142	0	0	Null_Model_OpenChrom	human
ReMap_ChIP	esc	MYC	9396	273378	0.03437	2661.88	159.365	42.256	3.52983	0	0	Null_Model_OpenChrom	human
Pazar_Chip	K562+BIO	TCF7L2	12387	273378	0.0453109	4119.93	195.694	42.245	3.00661	0	0	Null_Model_OpenChrom	human
Cistrome_ChIP	Monocyte_CD14+	CEBPB	8032	273378	0.0293806	2148.78	139.283	42.2394	3.73793	0	0	Null_Model_OpenChrom	human
ReMap_ChIP	flp143ha_0hr	ZNF143	21541	273378	0.0787957	9409.62	287.246	42.2335	2.28925	0	0	Null_Model_OpenChrom	human
Cistrome_ChIP	Proerythroblast_CD34+	IRF2	5476	273378	0.0200309	1141.64	102.632	42.2322	4.79663	0	0	Null_Model_OpenChrom	human
TxnFactorChIPV3	ECC-1+DMSO_0.02pct	CTCF	35022	273378	0.128108	18607.1	388.797	42.2196	1.88218	0	0	Null_Model_OpenChrom	human
Cistrome_ChIP	Lymphocyte	STAT5A	7235	273378	0.0264652	1836.25	127.945	42.196	3.9401	0	0	Null_Model_OpenChrom	human
Pazar_Chip	MCF7+oestrogen	RAD21	48672	273378	0.178039	28256.8	484.05	42.1757	1.72249	0	0	Null_Model_OpenChrom	human
ReMap_ChIP	u937_bio	TCF7L2	12551	273378	0.0459108	4330.74	194.977	42.1602	2.89812	0	0	Null_Model_OpenChrom	human
Misc_ChIP	LoVo	HES2	5622	273378	0.0205649	1257.53	103.535	42.1547	4.47065	0	0	Null_Model_OpenChrom	human
ReMap_ChIP	tall_prima2	TAL1	15217	273378	0.0556629	5834.24	222.594	42.1518	2.60822	0	0	Null_Model_OpenChrom	human
Pazar_Chip	CD40	TCF7L2	12387	273378	0.0453109	4125.65	196.068	42.1351	3.00244	0	0	Null_Model_OpenChrom	human
Cistrome_ChIP	CD34+	IRF2	5476	273378	0.0200309	1142.51	102.902	42.1128	4.79297	0	0	Null_Model_OpenChrom	human
TxnFactorChIPV3	H1-hESC	RAD21	76861	273378	0.281153	51731.4	596.898	42.1003	1.48577	0	0	Null_Model_OpenChrom	human
Cistrome_ChIP	SK-N-SH	EP300	47467	273378	0.173631	27946.3	463.781	42.0902	1.69851	0	0	Null_Model_OpenChrom	human
ReMap_ChIP	hepg2	CEBPA	29248	273378	0.106987	14415.1	352.476	42.0819	2.02898	0	0	Null_Model_OpenChrom	human
TxnFactorChIPV3	HepG2	SMC3	40936	273378	0.149741	23220.3	421.171	42.063	1.76294	0	0	Null_Model_OpenChrom	human
Pazar_Chip	THP-1	PPARG	12318	273378	0.0450585	4448.64	187.181	42.0414	2.76894	0	0	Null_Model_OpenChrom	human
TxnFactorChIPV3	IMR90	CEBPB	65670	273378	0.240217	42431.2	553.006	42.0228	1.54768	0	0	Null_Model_OpenChrom	human
ReMap_ChIP	hspc	IKZF1	4472	273378	0.0163583	834.495	86.5656	42.0202	5.35893	0	0	Null_Model_OpenChrom	human
Cistrome_ChIP	K562	STAT2	6073	273378	0.0222147	1467.99	109.591	42.0198	4.13694	0	0	Null_Model_OpenChrom	human
ReMap_ChIP	helab2_grkd_dmso	RELA	7350	273378	0.0268859	1917.56	129.288	42.0183	3.83299	0	0	Null_Model_OpenChrom	human
Cistrome_ChIP	Mononuclear_PBMC	STAT4	108259	273378	0.396005	80127.7	669.654	42.0087	1.35108	0	0	Null_Model_OpenChrom	human
TxnFactorChIPV3	H1-hESC	JUN	7838	273378	0.0286709	2250.2	133.089	41.9856	3.48324	0	0	Null_Model_OpenChrom	human
ReMap_ChIP	k562_bio	TCF7L2	12662	273378	0.0463168	4493.65	194.618	41.9711	2.81775	0	0	Null_Model_OpenChrom	human
TxnFactorChIPV3	HeLa-S3	SMARCA4	6615	273378	0.0241973	1712.78	116.825	41.9619	3.86214	0	0	Null_Model_OpenChrom	human
Pazar_Chip	PC3	GABPA	19260	273378	0.0704519	8271.02	261.936	41.9529	2.32861	0	0	Null_Model_OpenChrom	human
ReMap_ChIP	fibro_wl38_a39	CTCF	29258	273378	0.107024	14924.5	342.068	41.9025	1.9604	0	0	Null_Model_OpenChrom	human
TxnFactorChIPV3	K562	SMARCA4	8102	273378	0.0296366	2297.79	138.605	41.8758	3.52599	0	0	Null_Model_OpenChrom	human
TxnFactorChIPV3	K562+IFNa6h	JUN	12818	273378	0.0468875	4840.63	190.833	41.8029	2.648	0	0	Null_Model_OpenChrom	human
TxnFactorChIPV3	K562	GATA1	11484	273378	0.0420078	4025.18	178.434	41.8016	2.85304	0	0	Null_Model_OpenChrom	human
TxnFactorChIPV3	H1-hESC	CTBP2	20628	273378	0.075456	9487.24	266.675	41.7766	2.17429	0	0	Null_Model_OpenChrom	human
TxnFactorChIPV3	K562	NFE2	7734	273378	0.0282905	2299.58	130.158	41.7524	3.36323	0	0	Null_Model_OpenChrom	human
ReMap_ChIP	esc	SMAD3	19578	273378	0.0716151	8816	258.313	41.6626	2.22073	0	0	Null_Model_OpenChrom	human
Cistrome_ChIP	OCI-Ly3+SPIBKD	IRF4	2954	273378	0.0108056	472.3	59.573	41.6581	6.25449	0	0	Null_Model_OpenChrom	human
TxnFactorChIPV3	K562+IFNa30	IRF1	5251	273378	0.0192078	1228.57	96.5925	41.6433	4.27407	0	0	Null_Model_OpenChrom	human
ReMap_ChIP	imr90	TP53	7041	273378	0.0257555	1970.64	121.798	41.6293	3.57295	0	0	Null_Model_OpenChrom	human
Misc_ChIP	LoVo	TFAP2A	10482	273378	0.0383425	3622.63	164.816	41.6184	2.89348	0	0	Null_Model_OpenChrom	human
ReMap_ChIP	k562_bio	GATA2	27619	273378	0.101029	14558.3	313.978	41.5976	1.89713	0	0	Null_Model_OpenChrom	human
Misc_ChIP	LoVo	GLIS1	15442	273378	0.0564859	6485.36	215.396	41.5821	2.38106	0	0	Null_Model_OpenChrom	human
Pazar_Chip	Jurkat	TAL1	6673	273378	0.0244094	1853.18	115.935	41.5736	3.60083	0	0	Null_Model_OpenChrom	human
TxnFactorChIPV3	SK-N-SH_RA	EP300	47796	273378	0.174835	29829.1	432.594	41.533	1.60233	0	0	Null_Model_OpenChrom	human
Pazar_Chip	K562+C	CEBPA	5873	273378	0.0214831	1491.19	105.524	41.5243	3.93847	0	0	Null_Model_OpenChrom	human
ReMap_ChIP	t47d_dmso	FOXA1	36089	273378	0.132011	21090.3	361.578	41.4812	1.71116	0	0	Null_Model_OpenChrom	human
TxnFactorChIPV3	H1-hESC	REST	20625	273378	0.075445	9913.98	258.372	41.4558	2.0804	0	0	Null_Model_OpenChrom	human
TxnFactorChIPV3	MCF10A-Er-Src+EtOH_0.01pct	STAT3	21316	273378	0.0779726	10310.7	265.681	41.4229	2.06736	0	0	Null_Model_OpenChrom	human
TxnFactorChIPV3	K562	SMARCB1	6682	273378	0.0244423	1896.21	115.558	41.4147	3.52387	0	0	Null_Model_OpenChrom	human
ReMap_ChIP	hela	CTCF	25505	273378	0.0932957	13160	298.124	41.4091	1.93807	0	0	Null_Model_OpenChrom	human
ReMap_ChIP	vcap_dex	NR3C1	22340	273378	0.0817184	11301.9	266.64	41.3971	1.97666	0	0	Null_Model_OpenChrom	human
ReMap_ChIP	cd4_il12	STAT5A	4466	273378	0.0163364	1019.64	83.2737	41.386	4.37999	0	0	Null_Model_OpenChrom	human
ReMap_ChIP	esc	SMAD4	18973	273378	0.0694021	8886.3	243.876	41.3599	2.13508	0	0	Null_Model_OpenChrom	human
TxnFactorChIPV3	K562	RPC155	4331	273378	0.0158425	989.508	80.9395	41.2838	4.37692	0	0	Null_Model_OpenChrom	human
TxnFactorChIPV3	A549+EtOH_0.02pct	FOSL2	37970	273378	0.138892	22283.4	380.203	41.2586	1.70396	0	0	Null_Model_OpenChrom	human
TxnFactorChIPV3	K562	SIRT6	6640	273378	0.0242887	2000.41	112.501	41.2403	3.31932	0	0	Null_Model_OpenChrom	human
Cistrome_ChIP	Osteoblast	EP300	34774	273378	0.127201	19796.1	363.329	41.224	1.7566	0	0	Null_Model_OpenChrom	human
Pazar_Chip	H1	KLF4	11207	273378	0.0409945	4307.05	167.522	41.1883	2.60201	0	0	Null_Model_OpenChrom	human
Cistrome_ChIP	K562	SMAD1	20100	273378	0.0735246	9923.26	247.21	41.1664	2.02554	0	0	Null_Model_OpenChrom	human
Misc_ChIP	LoVo	ZNF236	3779	273378	0.0138234	796.107	72.539	41.1212	4.74685	0	0	Null_Model_OpenChrom	human
ReMap_ChIP	erythroid	TAL1	15513	273378	0.0567456	6950.88	208.257	41.1133	2.2318	0	0	Null_Model_OpenChrom	human
Pazar_Chip	K562+rhBMP4	SMAD1	19428	273378	0.0710664	9436.36	243.07	41.106	2.05884	0	0	Null_Model_OpenChrom	human
ReMap_ChIP	k562	GATA2	17041	273378	0.0623349	8086.02	217.949	41.0876	2.10747	0	0	Null_Model_OpenChrom	human
ReMap_ChIP	esc	POU5F1	10747	273378	0.0393119	4200.24	159.666	41.0029	2.55867	0	0	Null_Model_OpenChrom	human
ReMap_ChIP	ls180_veh	RXRA	18510	273378	0.0677084	9046.33	230.855	40.9939	2.04613	0	0	Null_Model_OpenChrom	human
TxnFactorChIPV3	GM12801	CTCF	7794	273378	0.02851	2667.85	125.143	40.9622	2.92145	0	0	Null_Model_OpenChrom	human
Cistrome_ChIP	THP-1	VDR	3963	273378	0.0144964	904.982	74.6881	40.9438	4.37909	0	0	Null_Model_OpenChrom	human
ReMap_ChIP	ls180_125	TCF4	14765	273378	0.0540095	6785.58	195.17	40.8845	2.17594	0	0	Null_Model_OpenChrom	human
ReMap_ChIP	ls180_125	MBD4	16025	273378	0.0586185	7339.59	212.578	40.8576	2.18337	0	0	Null_Model_OpenChrom	human
TxnFactorChIPV3	ECC-1+DMSO_0.02pct	FOXA1	12382	273378	0.0452926	5144.49	177.279	40.8255	2.40685	0	0	Null_Model_OpenChrom	human
TxnFactorChIPV3	HeLa-S3	FOS	16948	273378	0.0619947	8016.8	219.257	40.7339	2.11406	0	0	Null_Model_OpenChrom	human
ReMap_ChIP	ls180_veh	TCF4	14691	273378	0.0537388	6877.23	192.042	40.6877	2.13618	0	0	Null_Model_OpenChrom	human
Pazar_Chip	hESC	SMAD3	8347	273378	0.0305328	2971.44	132.162	40.674	2.80908	0	0	Null_Model_OpenChrom	human
Pazar_Chip	Jurkat	RUNX1	7087	273378	0.0259238	2337.71	116.861	40.6405	3.0316	0	0	Null_Model_OpenChrom	human
TxnFactorChIPV3	SH-SY5Y	GATA2	38218	273378	0.139799	23997.5	350.095	40.6188	1.59258	0	0	Null_Model_OpenChrom	human
ReMap_ChIP	liver	ONECUT1	20774	273378	0.07599	10735.5	247.349	40.5843	1.93507	0	0	Null_Model_OpenChrom	human
ReMap_ChIP	786o	ARNT	7055	273378	0.0258068	2399.43	114.968	40.4946	2.94029	0	0	Null_Model_OpenChrom	human
TxnFactorChIPV3	K562+IFNg6h	JUN	12825	273378	0.0469131	5634.35	177.58	40.4925	2.27621	0	0	Null_Model_OpenChrom	human
TxnFactorChIPV3	HEK293	TCF7L2	14599	273378	0.0534022	6878.17	190.897	40.445	2.12251	0	0	Null_Model_OpenChrom	human
ReMap_ChIP	h3396_etoh	ESR1	9791	273378	0.0358149	4007.19	143.071	40.4261	2.44336	0	0	Null_Model_OpenChrom	human
TxnFactorChIPV3	HeLa-S3	JUND	37358	273378	0.136653	23304.4	348.088	40.3737	1.60304	0	0	Null_Model_OpenChrom	human
Cistrome_ChIP	CD4+	SRCAP	18430	273378	0.0674158	9513.53	220.89	40.3661	1.93724	0	0	Null_Model_OpenChrom	human
TxnFactorChIPV3	HUVEC	FOS	49194	273378	0.179949	33219.7	396.137	40.3252	1.48087	0	0	Null_Model_OpenChrom	human
TxnFactorChIPV3	MCF10A-Er-Src+EtOH_0.01pct_12hr	STAT3	42371	273378	0.154991	27974.5	357.036	40.3222	1.51463	0	0	Null_Model_OpenChrom	human
Pazar_Chip	IMR90	TP53	3922	273378	0.0143464	979.125	72.9882	40.3199	4.00562	0	0	Null_Model_OpenChrom	human
TxnFactorChIPV3	MCF10A-Er-Src+4OHTAM_1uM_12hr	STAT3	41673	273378	0.152437	27153.6	360.514	40.2741	1.53471	0	0	Null_Model_OpenChrom	human
TxnFactorChIPV3	ECC-1+Genistein_100nM	ESR1	18276	273378	0.0668525	9627.34	214.973	40.2313	1.89834	0	0	Null_Model_OpenChrom	human
TxnFactorChIPV3	GM12878	JUND	5805	273378	0.0212343	1934.18	96.3688	40.1667	3.00127	0	0	Null_Model_OpenChrom	human
Cistrome_ChIP	HaematopoieticProgenitorCell	SMAD1	26783	273378	0.0979706	15733.4	275.76	40.0697	1.70231	0	0	Null_Model_OpenChrom	human
TxnFactorChIPV3	MCF10A-Er-Src+EtOH_0.01pct_4hr	STAT3	44276	273378	0.161959	30186.5	352.837	39.9321	1.46675	0	0	Null_Model_OpenChrom	human
TxnFactorChIPV3	H1-hESC	RXRA	4699	273378	0.0171887	1403.02	82.5633	39.9207	3.34921	0	0	Null_Model_OpenChrom	human
TxnFactorChIPV3	K562	BDP1	2446	273378	0.00894732	475.973	49.3726	39.9012	5.13895	0	0	Null_Model_OpenChrom	human
TxnFactorChIPV3	HepG2+forskolin	ESRRA	4664	273378	0.0170606	1404.14	81.7757	39.8635	3.32161	0	0	Null_Model_OpenChrom	human
TxnFactorChIPV3	PANC-1	REST	11787	273378	0.0431161	5498.81	158.133	39.7651	2.14356	0	0	Null_Model_OpenChrom	human
Pazar_Chip	K562+BIO	GATA1	17107	273378	0.0625764	9041.26	203.222	39.6894	1.8921	0	0	Null_Model_OpenChrom	human
ReMap_ChIP	h3396_e2	ESR1	14050	273378	0.051394	7070.58	176.568	39.5281	1.98711	0	0	Null_Model_OpenChrom	human
TxnFactorChIPV3	HeLa-S3	RPC155	5523	273378	0.0202028	1816.18	93.8259	39.5074	3.041	0	0	Null_Model_OpenChrom	human
Cistrome_ChIP	EndothelialCell	EP300	4908	273378	0.0179532	1613.29	83.6786	39.3734	3.04223	0	0	Null_Model_OpenChrom	human
TxnFactorChIPV3	MCF-7	TCF7L2	15583	273378	0.0570017	8232.11	187.057	39.2977	1.89295	0	0	Null_Model_OpenChrom	human
Pazar_Chip	THP-1	NR1H	17788	273378	0.0650674	9882.49	202.126	39.1118	1.79995	0	0	Null_Model_OpenChrom	human
ReMap_ChIP	lncap_dht	TFAP4	4353	273378	0.015923	1415.02	75.6267	38.8485	3.07628	0	0	Null_Model_OpenChrom	human
ReMap_ChIP	nci_h3122	FOXA1	35474	273378	0.129762	23849.3	300.306	38.7094	1.48742	0	0	Null_Model_OpenChrom	human
Pazar_Chip	megakaryocytes	TAL1	7174	273378	0.0262421	3008.31	107.669	38.6898	2.38473	0	0	Null_Model_OpenChrom	human
TxnFactorChIPV3	H1-hESC	NANOG	9121	273378	0.0333641	4242.96	126.106	38.6821	2.14968	0	0	Null_Model_OpenChrom	human
Pazar_Chip	erythroid	TAL1	9791	273378	0.0358149	4598.4	134.434	38.6256	2.12922	0	0	Null_Model_OpenChrom	human
ReMap_ChIP	helab2_wt_tnfa	RELA	13586	273378	0.0496968	7272.78	163.724	38.5601	1.86806	0	0	Null_Model_OpenChrom	human
Pazar_Chip	PASMC	SMAD1	7031	273378	0.025719	2968.62	105.64	38.455	2.36844	0	0	Null_Model_OpenChrom	human
ReMap_ChIP	helab2_wt_ta	NR3C1	15526	273378	0.0567932	8637.02	179.255	38.4312	1.79761	0	0	Null_Model_OpenChrom	human
TxnFactorChIPV3	K562	ZNF274	3669	273378	0.013421	1159.43	65.4984	38.315	3.16449	0	0	Null_Model_OpenChrom	human
Pazar_Chip	hESC	FOXH1	14515	273378	0.053095	8040.74	169.195	38.2651	1.80518	0	0	Null_Model_OpenChrom	human
ReMap_ChIP	u2os_eto	TP53	11917	273378	0.0435917	6319.88	147.646	37.9089	1.88564	0	0	Null_Model_OpenChrom	human
TxnFactorChIPV3	PBDEFetal	GATA1	5118	273378	0.0187213	2039.31	81.4193	37.8128	2.50967	0	0	Null_Model_OpenChrom	human
ReMap_ChIP	ls180_veh	NCOA1	5624	273378	0.0205722	2277.85	88.5235	37.7996	2.469	0	0	Null_Model_OpenChrom	human
ReMap_ChIP	ls180_125	RXRA	15582	273378	0.056998	8997.41	174.695	37.692	1.73183	0	0	Null_Model_OpenChrom	human
TxnFactorChIPV3	HepG2	JUN	14848	273378	0.0543131	8491.78	168.717	37.6739	1.74851	0	0	Null_Model_OpenChrom	human
TxnFactorChIPV3	ECC-1+Estradiol_10nM	ESR1	20175	273378	0.0737989	12672.7	199.471	37.6111	1.59201	0	0	Null_Model_OpenChrom	human
ReMap_ChIP	jurkat	RUNX1+3	2538	273378	0.00928385	706.019	48.8167	37.5278	3.5948	0	0	Null_Model_OpenChrom	human
ReMap_ChIP	u2os_actd	TP53	11932	273378	0.0436465	6374.01	148.186	37.5069	1.87198	3.55701e-308	5.55606e-305	Null_Model_OpenChrom	human
Cistrome_ChIP	IMR90	TP53	2607	273378	0.00953625	734.61	49.9555	37.4811	3.54882	9.34683e-308	1.45998e-304	Null_Model_OpenChrom	human
Pazar_Chip	THP-1	RXR	4834	273378	0.0176825	1846.91	79.8215	37.4221	2.61734	8.54623e-307	1.33492e-303	Null_Model_OpenChrom	human
ReMap_ChIP	ls180_125	NCOA1	11128	273378	0.0407055	5895.86	139.917	37.3944	1.88742	2.40545e-306	3.75731e-303	Null_Model_OpenChrom	human
ReMap_ChIP	t47d_e2	FOXA1	16127	273378	0.0589916	9544.85	176.339	37.3268	1.6896	3.02155e-305	4.71966e-302	Null_Model_OpenChrom	human
Pazar_Chip	MCF7+oestrogen	ERA	45223	273378	0.165423	33626.2	310.977	37.2913	1.34487	1.13458e-304	1.77221e-301	Null_Model_OpenChrom	human
TxnFactorChIPV3	HeLa-S3	STAT3	17856	273378	0.0653162	10859.9	187.794	37.2542	1.64422	4.52679e-304	7.07085e-301	Null_Model_OpenChrom	human
ReMap_ChIP	ls180_125	VDR	5526	273378	0.0202138	2371.63	84.8334	37.1831	2.33004	6.39375e-303	9.98704e-300	Null_Model_OpenChrom	human
Misc_ChIP	LoVo	NR2F2	3446	273378	0.0126053	1153.22	61.7389	37.1367	2.98815	3.5964e-302	5.61758e-299	Null_Model_OpenChrom	human
ReMap_ChIP	mcf7_e2	FOXA1	44588	273378	0.1631	33123	308.764	37.1319	1.34613	4.30317e-302	6.72156e-299	Null_Model_OpenChrom	human
ReMap_ChIP	k562_bmp	GATA1	20458	273378	0.0748341	13234.3	195.267	36.9939	1.54583	7.18513e-300	1.12232e-296	Null_Model_OpenChrom	human
ReMap_ChIP	lncap_dht	NKX3-1	10239	273378	0.0374536	5454.05	129.44	36.9667	1.87732	1.96672e-299	3.07202e-296	Null_Model_OpenChrom	human
ReMap_ChIP	t47d_r5	NR3C3	2255	273378	0.00824865	622.335	44.1676	36.9652	3.62345	2.07344e-299	3.23871e-296	Null_Model_OpenChrom	human
TxnFactorChIPV3	HepG2	TCF12	4909	273378	0.0179568	1969.96	79.5538	36.944	2.49192	4.54013e-299	7.09169e-296	Null_Model_OpenChrom	human
TxnFactorChIPV3	H1-hESC	MAFK	12390	273378	0.0453219	6882.24	149.414	36.8625	1.80029	9.23781e-298	1.44295e-294	Null_Model_OpenChrom	human
TxnFactorChIPV3	HUVEC	JUN	30822	273378	0.112745	21773	246.149	36.7622	1.4156	3.71638e-296	5.80499e-293	Null_Model_OpenChrom	human
TxnFactorChIPV3	HeLa-S3	PRDM1	7674	273378	0.028071	3718.9	107.976	36.6294	2.06351	4.86944e-294	7.60606e-291	Null_Model_OpenChrom	human
ReMap_ChIP	mcf7_gatakd_e2	ESR1	46694	273378	0.170804	35478.5	306.788	36.5576	1.31612	6.74278e-293	1.05322e-289	Null_Model_OpenChrom	human
ReMap_ChIP	esc	PRDM14	7735	273378	0.0282942	3871.88	105.972	36.4542	1.99774	2.94898e-291	4.60631e-288	Null_Model_OpenChrom	human
ReMap_ChIP	mcf7_etoh	FOXA1	41450	273378	0.151622	31118.2	283.474	36.4471	1.33202	3.81946e-291	5.96599e-288	Null_Model_OpenChrom	human
TxnFactorChIPV3	GM12878	ZZZ3	2251	273378	0.00823402	660.188	43.6546	36.4409	3.40963	4.80205e-291	7.5008e-288	Null_Model_OpenChrom	human
ReMap_ChIP	t47d_r30	NR3C3	1756	273378	0.00642334	443.615	36.1403	36.3136	3.95839	4.94225e-289	7.7198e-286	Null_Model_OpenChrom	human
ReMap_ChIP	helab2_wt_ta_tnfa	NR3C1	13080	273378	0.0478458	7819.77	145.515	36.1491	1.67268	1.92141e-286	3.00123e-283	Null_Model_OpenChrom	human
ReMap_ChIP	mcf7_e2	ESR1	55776	273378	0.204025	44034.3	325.461	36.0773	1.26665	2.57842e-285	4.02749e-282	Null_Model_OpenChrom	human
TxnFactorChIPV3	HeLa-S3	BDP1	1769	273378	0.00647089	450.385	36.6252	36.0029	3.92775	3.76575e-284	5.88211e-281	Null_Model_OpenChrom	human
TxnFactorChIPV3	U2OS	SETDB1	12242	273378	0.0447805	7290.45	137.711	35.956	1.67918	2.04006e-283	3.18658e-280	Null_Model_OpenChrom	human
ReMap_ChIP	mcf7	ESR1	43302	273378	0.158396	33065.3	286.572	35.7214	1.30959	9.20638e-280	1.43804e-276	Null_Model_OpenChrom	human
ReMap_ChIP	u2os_e2	ESR2	21059	273378	0.0770325	14310.1	189.621	35.5912	1.47161	9.57923e-278	1.49628e-274	Null_Model_OpenChrom	human
ReMap_ChIP	esc	SMAD2+3	13033	273378	0.0476739	8040.96	141.278	35.335	1.62083	8.51791e-274	1.3305e-270	Null_Model_OpenChrom	human
TxnFactorChIPV3	ECC-1+DEX_100nM	NR3C1	13193	273378	0.0482592	8032.81	146.221	35.2903	1.64239	4.13518e-273	6.45915e-270	Null_Model_OpenChrom	human
TxnFactorChIPV3	MCF10A-Er-Src+4OHTAM_1uM_36hr	FOS	52852	273378	0.193329	42178.1	304.117	35.098	1.25307	3.61314e-270	5.64373e-267	Null_Model_OpenChrom	human
TxnFactorChIPV3	HepG2	MAFF	23792	273378	0.0870297	16658	203.796	35.0055	1.42826	9.27872e-269	1.44934e-265	Null_Model_OpenChrom	human
Pazar_Chip	MCF7+estradiol	GATA3	33503	273378	0.122552	25033.9	243.48	34.7836	1.33831	2.15629e-265	3.36813e-262	Null_Model_OpenChrom	human
Cistrome_ChIP	HeLa-S3	STAT1	22172	273378	0.0811038	15485.7	192.356	34.7603	1.43178	4.85072e-265	7.57682e-262	Null_Model_OpenChrom	human
Pazar_Chip	K562+BMP4	GATA2	8879	273378	0.0324788	5019.77	111.107	34.7343	1.76881	1.19687e-264	1.8695e-261	Null_Model_OpenChrom	human
ReMap_ChIP	mcf7	FOXA1	24398	273378	0.0892464	17421.3	201.079	34.6964	1.40047	4.4678e-264	6.97871e-261	Null_Model_OpenChrom	human
TxnFactorChIPV3	Dnd41	EZH2	4875	273378	0.0178325	2295.22	74.4275	34.6617	2.12398	1.48984e-263	2.32714e-260	Null_Model_OpenChrom	human
ReMap_ChIP	u2os_notreated	ESR2	10291	273378	0.0376438	6153.09	120.087	34.4577	1.67249	1.72915e-260	2.70094e-257	Null_Model_OpenChrom	human
Cistrome_ChIP	Lymphocyte	STAT1	2617	273378	0.00957283	954.122	48.4493	34.322	2.74283	1.84322e-258	2.87911e-255	Null_Model_OpenChrom	human
TxnFactorChIPV3	HUVEC	GATA2	27021	273378	0.0988412	19688.5	214.218	34.2293	1.37243	4.43213e-257	6.92299e-254	Null_Model_OpenChrom	human
Pazar_Chip	K562+BMP4	GATA1	12507	273378	0.0457498	7860.03	136.457	34.0544	1.59122	1.74554e-254	2.72653e-251	Null_Model_OpenChrom	human
Pazar_Chip	MCF7	TFAP2C	2718	273378	0.00994228	1036.62	49.6554	33.8611	2.622	1.24632e-251	1.94675e-248	Null_Model_OpenChrom	human
ReMap_ChIP	lncap1f5	FOXA1	28138	273378	0.102927	21049.5	209.363	33.8575	1.33675	1.40818e-251	2.19958e-248	Null_Model_OpenChrom	human
ReMap_ChIP	h2171	MBD4	3644	273378	0.0133295	1601.14	60.4464	33.7962	2.27587	1.12294e-250	1.75403e-247	Null_Model_OpenChrom	human
Pazar_Chip	adipocyte	PPARg	18638	273378	0.0681767	13068.3	165.655	33.6221	1.4262	3.99162e-248	6.23491e-245	Null_Model_OpenChrom	human
ReMap_ChIP	t47d_r360	NR3C3	1878	273378	0.00686961	640.336	37.0099	33.4414	2.93283	1.71749e-245	2.68272e-242	Null_Model_OpenChrom	human
TxnFactorChIPV3	HepG2	MAFK	32526	273378	0.118978	25160.3	221.991	33.18	1.29275	1.0447e-241	1.63183e-238	Null_Model_OpenChrom	human
Pazar_Chip	HUVEC	SMAD1	2453	273378	0.00897292	949.779	45.5868	32.9749	2.58271	9.29645e-239	1.45211e-235	Null_Model_OpenChrom	human
Cistrome_ChIP	A549	SMAD3	13620	273378	0.0498211	9074.7	139.216	32.6492	1.50088	4.11451e-234	6.42687e-231	Null_Model_OpenChrom	human
Pazar_Chip	hESC	SMAD2-3	11371	273378	0.0415944	7349.51	123.389	32.5919	1.54718	2.66665e-233	4.16531e-230	Null_Model_OpenChrom	human
Pazar_Chip	U20S+Doxycycline	Erbeta	8582	273378	0.0313924	5265.92	102.614	32.3161	1.62973	2.07463e-229	3.24056e-226	Null_Model_OpenChrom	human
Pazar_Chip	HeLa	SMC4	15815	273378	0.0578503	10995.8	149.709	32.1906	1.43828	1.19641e-227	1.86879e-224	Null_Model_OpenChrom	human
Cistrome_ChIP	TT	TP63	8935	273378	0.0326837	5570.53	104.967	32.0526	1.60398	1.01056e-225	1.5785e-222	Null_Model_OpenChrom	human
Pazar_Chip	keratinocytes	TP63	20568	273378	0.0752365	15109.8	170.662	31.9825	1.36124	9.54683e-225	1.49121e-221	Null_Model_OpenChrom	human
TxnFactorChIPV3	A549+DEX_50nM	NR3C1	23877	273378	0.0873406	17835.6	189.409	31.8963	1.33873	1.50249e-223	2.34689e-220	Null_Model_OpenChrom	human
Pazar_Chip	U20S	ESR2	8582	273378	0.0313924	5268	104.335	31.7631	1.62908	1.04733e-221	1.63594e-218	Null_Model_OpenChrom	human
ReMap_ChIP	lcl_dex	NFKB1	4648	273378	0.0170021	2420.94	70.2597	31.6976	1.91992	8.38799e-221	1.3102e-217	Null_Model_OpenChrom	human
ReMap_ChIP	k562_bmp4	SMAD1	9202	273378	0.0336604	5763.4	109.051	31.5322	1.59663	1.57481e-218	2.45986e-215	Null_Model_OpenChrom	human
Cistrome_ChIP	KYSE-70	TP63	4458	273378	0.0163071	2326.81	67.7921	31.4371	1.91593	3.15059e-217	4.92121e-214	Null_Model_OpenChrom	human
ReMap_ChIP	helab2_p65kd_dmso	RELA	7138	273378	0.0261104	4309.16	90.0394	31.4178	1.65647	5.77499e-217	9.02054e-214	Null_Model_OpenChrom	human
ReMap_ChIP	CD34_prog_bio	TCF7L2	2147	273378	0.00785359	849.081	41.3681	31.3749	2.52861	2.22674e-216	3.47816e-213	Null_Model_OpenChrom	human
Cistrome_ChIP	BG03	SMAD3	4152	273378	0.0151878	2170.77	63.4966	31.2022	1.91269	4.9769e-214	7.77392e-211	Null_Model_OpenChrom	human
ReMap_ChIP	lcl_etoh	NFKB1	4673	273378	0.0170935	2534.44	68.5683	31.1887	1.8438	7.58452e-214	1.1847e-210	Null_Model_OpenChrom	human
Pazar_Chip	MCF7+E2	FOXA1	28314	273378	0.103571	22220.6	195.465	31.1739	1.27422	1.20168e-213	1.87702e-210	Null_Model_OpenChrom	human
ReMap_ChIP	pc3	JUND	9127	273378	0.033386	5929.54	103.671	30.8424	1.53924	3.53848e-209	5.52711e-206	Null_Model_OpenChrom	human
ReMap_ChIP	mcf7_veh	FOXA1	50076	273378	0.183175	42083.5	259.283	30.8254	1.18992	5.98892e-209	9.35469e-206	Null_Model_OpenChrom	human
ReMap_ChIP	t47d	NR3C3	17313	273378	0.0633299	12692.1	150.453	30.7133	1.36408	1.88965e-207	2.95164e-204	Null_Model_OpenChrom	human
Cistrome_ChIP	CD34+	TAL1	4902	273378	0.0179312	2699.47	72.2218	30.4967	1.81591	1.44149e-204	2.25161e-201	Null_Model_OpenChrom	human
TxnFactorChIPV3	GM12878	EZH2	6528	273378	0.023879	3936.86	85.0867	30.453	1.65818	5.47086e-204	8.54548e-201	Null_Model_OpenChrom	human
Pazar_Chip	U20S+DoxycyclineandE2	Erbeta	14180	273378	0.0518696	10229.9	130.443	30.2822	1.38613	9.82376e-202	1.53447e-198	Null_Model_OpenChrom	human
Misc_ChIP	Jurkat	TAT	2993	273378	0.0109482	1454.18	50.9073	30.2279	2.0582	5.09982e-201	7.96591e-198	Null_Model_OpenChrom	HIV
Cistrome_ChIP	HeLa-S3	STAT3	17064	273378	0.0624191	12507.3	151.989	29.9802	1.36432	8.89601e-198	1.38956e-194	Null_Model_OpenChrom	human
TxnFactorChIPV3	IMR90	MAFK	26228	273378	0.0959404	20739.9	183.556	29.8989	1.26462	1.01637e-196	1.58756e-193	Null_Model_OpenChrom	human
TxnFactorChIPV3	HeLa-S3	JUN	21421	273378	0.0783567	16496.8	165.63	29.7299	1.29849	1.57873e-194	2.46597e-191	Null_Model_OpenChrom	human
ReMap_ChIP	esc	KLF4	2405	273378	0.00879734	1086.41	44.5673	29.5865	2.21372	1.11313e-192	1.73871e-189	Null_Model_OpenChrom	human
Cistrome_ChIP	U2OS	TP53	3858	273378	0.0141123	2073.64	60.349	29.5674	1.8605	1.96348e-192	3.06695e-189	Null_Model_OpenChrom	human
TxnFactorChIPV3	H1-hESC	POU5F1	4623	273378	0.0169107	2683.66	66.0727	29.3516	1.72265	1.1404e-189	1.7813e-186	Null_Model_OpenChrom	human
TxnFactorChIPV3	K562+MNaseD	SETDB1	2259	273378	0.00826328	1027.72	42.1447	29.2155	2.19807	6.15541e-188	9.61475e-185	Null_Model_OpenChrom	human
Pazar_Chip	liver	FOXA2	8744	273378	0.031985	5819.93	100.284	29.1578	1.50242	3.3259e-187	5.19505e-184	Null_Model_OpenChrom	human
Pazar_Chip	LS180+Veh	RXR	1410	273378	0.00515769	538.624	30.0304	29.0164	2.61778	2.0416e-185	3.18898e-182	Null_Model_OpenChrom	human
TxnFactorChIPV3	MCF10A-Er-Src+EtOH_0.01pct	FOS	48830	273378	0.178617	41885.9	240.593	28.8625	1.16579	1.76785e-183	2.76138e-180	Null_Model_OpenChrom	human
Pazar_Chip	MCF7	TRIM24	11342	273378	0.0414883	8113.48	112.96	28.5811	1.39792	5.7688e-180	9.01087e-177	Null_Model_OpenChrom	human
ReMap_ChIP	lncap_etoh	AR	21137	273378	0.0773179	16720.1	158.343	27.8943	1.26416	1.56387e-171	2.44276e-168	Null_Model_OpenChrom	human
Pazar_Chip	MCF7	GATA3	17233	273378	0.0630373	13312.5	140.886	27.8278	1.2945	1.00049e-170	1.56276e-167	Null_Model_OpenChrom	human
TxnFactorChIPV3	A549+DEX_500pM	NR3C1	2164	273378	0.00791578	1050.86	40.1006	27.7588	2.05927	6.81885e-170	1.0651e-166	Null_Model_OpenChrom	human
ReMap_ChIP	t47d_r60	NR3C3	2153	273378	0.00787554	1018.69	40.8763	27.7499	2.11351	8.72811e-170	1.36333e-166	Null_Model_OpenChrom	human
TxnFactorChIPV3	ECC-1+BPA_100nM	ESR1	6024	273378	0.0220354	3863.48	78.0815	27.6701	1.55922	8.00593e-169	1.25053e-165	Null_Model_OpenChrom	human
ReMap_ChIP	ab32	NR3C3	19086	273378	0.0698154	14910.9	151.549	27.5496	1.28	2.23943e-167	3.49799e-164	Null_Model_OpenChrom	human
Pazar_Chip	LS180	RXR	2642	273378	0.00966427	1391.41	45.7004	27.365	1.89879	3.57934e-165	5.59094e-162	Null_Model_OpenChrom	human
Pazar_Chip	Saos	Tp73beta	20786	273378	0.0760339	16427	159.706	27.2936	1.26535	2.52299e-164	3.94091e-161	Null_Model_OpenChrom	human
Pazar_Chip	MCF7+ETOH	FOXA1	26398	273378	0.0965623	21516.7	179.649	27.1713	1.22686	7.08593e-163	1.10682e-159	Null_Model_OpenChrom	human
ReMap_ChIP	mcf7	GREB1	10095	273378	0.0369269	7247.62	105.786	26.9163	1.39287	7.07393e-160	1.10495e-156	Null_Model_OpenChrom	human
Cistrome_ChIP	GM12878	TP53	1593	273378	0.0058271	710.457	32.8399	26.8741	2.24222	2.20622e-159	3.44612e-156	Null_Model_OpenChrom	human
Cistrome_ChIP	Lymphocyte	STAT4	1882	273378	0.00688424	903.165	36.6708	26.6925	2.08378	2.8781e-157	4.49559e-154	Null_Model_OpenChrom	human
TxnFactorChIPV3	MCF10A-Er-Src+4OHTAM_1uM_12hr	FOS	59201	273378	0.216554	52465.8	252.853	26.637	1.12837	1.26525e-156	1.97632e-153	Null_Model_OpenChrom	human
Misc_ChIP	LoVo	HNF4A	7582	273378	0.0277345	5237.47	88.8335	26.3924	1.44764	8.38431e-154	1.30963e-150	Null_Model_OpenChrom	human
Cistrome_ChIP	PBMC	STAT4	73790	273378	0.269919	66511.3	276.685	26.3068	1.10944	8.01931e-153	1.25262e-149	Null_Model_OpenChrom	human
Cistrome_ChIP	HCC95	TP63	6254	273378	0.0228767	4220.07	77.7404	26.163	1.48196	3.50222e-151	5.47047e-148	Null_Model_OpenChrom	human
ReMap_ChIP	lncap_1f5_dht+dex	NR3C1	23054	273378	0.0843301	18913.1	160.921	25.7325	1.21894	2.5322e-146	3.95529e-143	Null_Model_OpenChrom	human
ReMap_ChIP	keratinocyte	TP63	32389	273378	0.118477	27553.8	189.357	25.535	1.17548	4.02822e-144	6.29208e-141	Null_Model_OpenChrom	human
Pazar_Chip	Saos	Tp73alpha	17050	273378	0.0623679	13638.4	135.813	25.1195	1.25014	1.52238e-139	2.37795e-136	Null_Model_OpenChrom	human
Pazar_Chip	Caco-2_differentiated	GATA6	58036	273378	0.212292	51917	245.494	24.9254	1.11786	1.97538e-137	3.08554e-134	Null_Model_OpenChrom	human
Cistrome_ChIP	K562	STAT1	2386	273378	0.00872784	1296.52	44.0425	24.7371	1.84032	2.1336e-135	3.33268e-132	Null_Model_OpenChrom	human
ReMap_ChIP	mcf7_gatakd_veh	FOXA1	50247	273378	0.1838	44531.3	231.905	24.6468	1.12835	1.99268e-134	3.11256e-131	Null_Model_OpenChrom	human
ReMap_ChIP	imr90h	SNAPC5	2121	273378	0.00775849	1137.44	39.9752	24.6042	1.86471	5.69686e-134	8.89849e-131	Null_Model_OpenChrom	human
ReMap_ChIP	mcf7	AHR	6471	273378	0.0236705	4558.57	77.8778	24.5568	1.41953	1.82786e-133	2.85511e-130	Null_Model_OpenChrom	human
ReMap_ChIP	saos	TAp73b	18119	273378	0.0662782	14698.9	139.57	24.5047	1.23268	6.58251e-133	1.02819e-129	Null_Model_OpenChrom	human
Pazar_Chip	LS180	TCF4	3250	273378	0.0118883	2001.51	51.4256	24.2775	1.62377	1.69477e-130	2.64723e-127	Null_Model_OpenChrom	human
ReMap_ChIP	saos	TAp73a	16185	273378	0.0592037	12957	133.025	24.2662	1.24913	2.23282e-130	3.48766e-127	Null_Model_OpenChrom	human
ReMap_ChIP	esc	FOXH1	14225	273378	0.0520342	11344.3	120.588	23.8892	1.25394	1.98195e-126	3.09581e-123	Null_Model_OpenChrom	human
TxnFactorChIPV3	HeLa-S3	FAM48A	2347	273378	0.00858518	1331.18	42.6358	23.8255	1.76309	9.09697e-126	1.42095e-122	Null_Model_OpenChrom	human
TxnFactorChIPV3	HeLa-S3	EP300	21630	273378	0.0791212	17992.3	153.187	23.747	1.20218	5.90566e-125	9.22464e-122	Null_Model_OpenChrom	human
Pazar_Chip	U20S+5nM-Actinomycin-D	P53	2555	273378	0.00934603	1494.63	44.8361	23.6498	1.70945	5.9258e-124	9.25609e-121	Null_Model_OpenChrom	human
ReMap_ChIP	mcf7	ARNT	4402	273378	0.0161022	2938.11	62.72	23.3401	1.49824	8.6896e-121	1.35732e-117	Null_Model_OpenChrom	human
Pazar_Chip	LS180+Veh	TCF4	2927	273378	0.0107068	1783.4	49.0467	23.3165	1.64124	1.50797e-120	2.35546e-117	Null_Model_OpenChrom	human
Pazar_Chip	MCF7+estrogen	ER	7098	273378	0.025964	5229.82	82.9086	22.533	1.35722	9.84689e-113	1.53808e-109	Null_Model_OpenChrom	human
Pazar_Chip	LS180	VDR	1869	273378	0.00683669	1035.98	36.9931	22.5182	1.80408	1.37794e-112	2.15235e-109	Null_Model_OpenChrom	human
ReMap_ChIP	esc	SOX2	12761	273378	0.046679	10381	110.523	21.5339	1.22926	3.74669e-103	5.85233e-100	Null_Model_OpenChrom	human
ReMap_ChIP	bgo3	SMAD3	2078	273378	0.0076012	1220.65	39.9089	21.4826	1.70237	1.1324e-102	1.76881e-99	Null_Model_OpenChrom	human
Misc_ChIP	Kasumi-1_siRE	RUNX1-ETO	2047	273378	0.0074878	1190.79	39.9966	21.407	1.71902	5.74623e-102	8.97561e-99	Null_Model_OpenChrom	human
ReMap_ChIP	lncap1f5_sifoxa1	FOXA1	9046	273378	0.0330897	7077.01	92.5798	21.2681	1.27822	1.12206e-100	1.75266e-97	Null_Model_OpenChrom	human
Cistrome_ChIP	Saos-2	TP73	13438	273378	0.0491554	11032.9	114.248	21.0516	1.21799	1.10558e-98	1.72691e-95	Null_Model_OpenChrom	human
TxnFactorChIPV3	MCF-7	ZNF217	9133	273378	0.033408	7173.6	94.4885	20.7369	1.27314	8.04983e-96	1.25738e-92	Null_Model_OpenChrom	human
ReMap_ChIP	hela_m	SMC4	2854	273378	0.0104398	1874.59	47.5655	20.5907	1.52246	1.66386e-94	2.59895e-91	Null_Model_OpenChrom	human
TxnFactorChIPV3	T-47D+Genistein_100nM	ESR1	8757	273378	0.0320326	6912.66	90.6471	20.3464	1.26681	2.49987e-92	3.90479e-89	Null_Model_OpenChrom	human
TxnFactorChIPV3	T-47D+Estradiol_10nM	ESR1	8742	273378	0.0319777	6891.27	90.9904	20.3398	1.26856	2.85582e-92	4.46079e-89	Null_Model_OpenChrom	human
Cistrome_ChIP	MCF-7	EP300	13627	273378	0.0498467	11329.9	114.268	20.1024	1.20274	3.51304e-90	5.48737e-87	Null_Model_OpenChrom	human
ReMap_ChIP	lncap1f5	AR	7062	273378	0.0258324	5478.1	80.1803	19.7542	1.28913	3.69064e-87	5.76478e-84	Null_Model_OpenChrom	human
ReMap_ChIP	imr90h	SNAPC1	3068	273378	0.0112226	2075.06	50.6688	19.5967	1.47851	8.24129e-86	1.28729e-82	Null_Model_OpenChrom	human
ReMap_ChIP	t47d	FOXA1	21954	273378	0.0803064	19161.3	144.054	19.3864	1.14575	5.0278e-84	7.85343e-81	Null_Model_OpenChrom	human
ReMap_ChIP	leiomyoma_ru486	NR3C3	22130	273378	0.0809502	19224.6	150.938	19.2491	1.15113	7.18604e-83	1.12246e-79	Null_Model_OpenChrom	human
Pazar_Chip	Caco-2_proliferating	GATA6	63307	273378	0.231573	58766.3	237.622	19.1091	1.07727	1.06136e-81	1.65784e-78	Null_Model_OpenChrom	human
ReMap_ChIP	lcl_etoh	NR3C1	3837	273378	0.0140355	2745.13	58.1165	18.7876	1.39775	4.7703e-79	7.45121e-76	Null_Model_OpenChrom	human
Pazar_Chip	HSPC	SPI1	2292	273378	0.008384	1521.22	42.499	18.1364	1.50668	8.22427e-74	1.28463e-70	Null_Model_OpenChrom	human
Misc_ChIP	LoVo	TCF7L2	3057	273378	0.0111823	2153.45	50.7947	17.7882	1.41958	4.35821e-71	6.80753e-68	Null_Model_OpenChrom	human
Pazar_Chip	CD34+eryth	SMAD1	3602	273378	0.0131759	2639.16	55.7328	17.276	1.36483	3.56455e-67	5.56782e-64	Null_Model_OpenChrom	human
Cistrome_ChIP	Keratinocyte	TP63	3893	273378	0.0142404	2923.2	56.7017	17.1036	1.33176	6.97418e-66	1.08937e-62	Null_Model_OpenChrom	human
TxnFactorChIPV3	H1-hESC	BCL11A	2473	273378	0.00904608	1731.5	44.526	16.6533	1.42824	1.43253e-62	2.23761e-59	Null_Model_OpenChrom	human
TxnFactorChIPV3	K562	KAP1	2195	273378	0.00802918	1519.06	40.6589	16.6246	1.44497	2.31124e-62	3.61015e-59	Null_Model_OpenChrom	human
Pazar_Chip	endoderm	FOXH1	18087	273378	0.0661611	15900.7	131.565	16.6179	1.1375	2.58709e-62	4.04103e-59	Null_Model_OpenChrom	human
ReMap_ChIP	endoderm	SMAD4	11345	273378	0.0414993	9691.27	103.027	16.0514	1.17064	2.7951e-58	4.36595e-55	Null_Model_OpenChrom	human
ReMap_ChIP	imr90h	SNAPC4	3771	273378	0.0137941	2969.57	56.4595	14.1948	1.26988	4.92992e-46	7.70053e-43	Null_Model_OpenChrom	human
TxnFactorChIPV3	HepG2	TCF7L2	2511	273378	0.00918508	1908.67	45.2516	13.3107	1.31557	1.00343e-40	1.56736e-37	Null_Model_OpenChrom	human
Pazar_Chip	U20S+10M-Etoposide	P53	2646	273378	0.00967891	2040.54	47.4461	12.761	1.29671	1.35425e-37	2.11533e-34	Null_Model_OpenChrom	human
ReMap_ChIP	esc	RNF2	2005	273378	0.00733417	1512.47	40.7836	12.0766	1.32564	7.01705e-34	1.09606e-30	Null_Model_OpenChrom	human
ReMap_ChIP	lncap_1f5_dex	NR3C1	13094	273378	0.0478971	11779.7	109.639	11.9878	1.11158	2.059e-33	3.21615e-30	Null_Model_OpenChrom	human
TxnFactorChIPV3	MCF-7	GATA3	10608	273378	0.0388034	9435.66	98.1347	11.9463	1.12425	3.3951e-33	5.30315e-30	Null_Model_OpenChrom	human
ReMap_ChIP	lncap1f5_sifoxa1	AR	11163	273378	0.0408336	9993.03	99.5398	11.7538	1.11708	3.37681e-32	5.27458e-29	Null_Model_OpenChrom	human
Pazar_Chip	LS180	CDX2	5366	273378	0.0196285	4582.81	67.0152	11.6868	1.1709	7.4442e-32	1.16278e-28	Null_Model_OpenChrom	human
Pazar_Chip	heart	NFKB1_p53	13001	273378	0.0475569	11728.4	110.682	11.4981	1.10851	6.74181e-31	1.05307e-27	Null_Model_OpenChrom	human
Pazar_Chip	LS180+Veh	CDX2	4991	273378	0.0182568	4242.09	66.0677	11.3355	1.17654	4.37851e-30	6.83923e-27	Null_Model_OpenChrom	human
ReMap_ChIP	lcl_dex	NR3C1	4575	273378	0.0167351	3875.42	63.7051	10.9815	1.18052	2.34568e-28	3.66395e-25	Null_Model_OpenChrom	human
Cistrome_ChIP	NCI-H441	SMAD4	8272	273378	0.0302585	7310.38	89.1847	10.7823	1.13154	2.0864e-27	3.25896e-24	Null_Model_OpenChrom	human
ReMap_ChIP	lncap_c4_2b	RUNX2	21337	273378	0.0780494	19859.1	138.749	10.6518	1.07442	8.55417e-27	1.33616e-23	Null_Model_OpenChrom	human
TxnFactorChIPV3	MCF10A-Er-Src+4OHTAM_1uM_4hr	FOS	51878	273378	0.189767	49654.1	215.251	10.3318	1.04479	2.53044e-25	3.95254e-22	Null_Model_OpenChrom	human
ReMap_ChIP	lncap_dht	AR	36757	273378	0.134455	35041.5	177.149	9.68378	1.04896	1.767e-22	2.76005e-19	Null_Model_OpenChrom	human
TxnFactorChIPV3	K562	EZH2	2425	273378	0.0088705	1998.58	45.642	9.3428	1.21336	4.6908e-21	7.32702e-18	Null_Model_OpenChrom	human
ReMap_ChIP	lncap_etoh	FOXA1	31372	273378	0.114757	29870.2	164.984	9.10244	1.05028	4.41627e-20	6.89822e-17	Null_Model_OpenChrom	human
Cistrome_ChIP	IMR90	RELA	1478	273378	0.00540643	1170.8	34.5473	8.89204	1.26238	2.99988e-19	4.68581e-16	Null_Model_OpenChrom	human
Cistrome_ChIP	HeLa-S3	EP300	20903	273378	0.0764619	19788.2	136.384	8.17361	1.05633	1.49645e-16	2.33746e-13	Null_Model_OpenChrom	human
ReMap_ChIP	zr751	FOXA1	19177	273378	0.0701483	18162.9	132.137	7.67445	1.05583	8.30652e-15	1.29748e-11	Null_Model_OpenChrom	human
Pazar_Chip	LNCaP	FOXA1	23640	273378	0.0864737	22578.1	144.053	7.37157	1.04703	8.4316e-14	1.31702e-10	Null_Model_OpenChrom	human
Pazar_Chip	endoderm	SMAD2-3	2132	273378	0.00779873	1866.75	43.5854	6.08578	1.14209	5.79628e-10	9.05379e-07	Null_Model_OpenChrom	human
TxnFactorChIPV3	T-47D+BPA_100nM	ESR1	3032	273378	0.0110909	2721.84	51.3528	6.03988	1.11395	7.7115e-10	1.20454e-06	Null_Model_OpenChrom	human
Cistrome_ChIP	PC-3	ETV4	2015	273378	0.00737075	1791.37	42.0622	5.31661	1.12484	5.28583e-08	8.25647e-05	Null_Model_OpenChrom	human
Pazar_Chip	endoderm	SMAD4	3204	273378	0.01172	2945.86	53.7477	4.80286	1.08763	7.82084e-07	0.00122162	Null_Model_OpenChrom	human
ReMap_ChIP	c42b_dht	FOXA1	7972	273378	0.0291611	7677.02	83.1605	3.54716	1.03842	0.000194702	0.304124	Null_Model_OpenChrom	human
Pazar_Chip	LNCaP	NKX31	2614	273378	0.00956185	2496.67	50.0144	2.34587	1.04699	0.00949136	1	Null_Model_OpenChrom	human
ReMap_ChIP	lncap1f5_sifoxa1	NR3C1	6176	273378	0.0225914	6081.31	75.5578	1.25324	1.01557	0.105059	1	Null_Model_OpenChrom	human
TxnFactorChIPV3	NT2-D1	ZNF274	64	273378	0.000234108	187.521	13.5722	0	0.341295	0.5	1	Null_Model_OpenChrom	human
TxnFactorChIPV3	HeLa-S3	EZH2	778	273378	0.00284588	1080.58	33.8946	0	0.719986	0.5	1	Null_Model_OpenChrom	human
ReMap_ChIP	plasma_jq1	CDK9	1237	273378	0.00452487	345.592	27.2783	0	3.57937	0.5	1	Null_Model_OpenChrom	human
ReMap_ChIP	ls180_veh	VDR	255	273378	0.000932774	98.007	10.6826	0	2.60186	0.5	1	Null_Model_OpenChrom	human
ReMap_ChIP	imr90_senescent_shluc	TP53	618	273378	0.00226061	468.603	21.7625	0	1.31881	0.5	1	Null_Model_OpenChrom	human
ReMap_ChIP	hela_s3_s	SFMBT1	401	273378	0.00146683	286.851	17.2315	0	1.39794	0.5	1	Null_Model_OpenChrom	human
Pazar_Chip	endoderm	SMAD3	1285	273378	0.00470045	1441.71	38.473	0	0.891305	0.5	1	Null_Model_OpenChrom	human
Pazar_Chip	U20S+5nM-Actinomycin-D	p53-pS15	1019	273378	0.00372744	822.283	28.5717	0	1.23923	0.5	1	Null_Model_OpenChrom	human
Pazar_Chip	U20S+10M-Etoposide	p53-pS46	678	273378	0.00248008	380.317	19.9738	0	1.78272	0.5	1	Null_Model_OpenChrom	human
Pazar_Chip	U20S+10M-Etoposide	p53-pS15	848	273378	0.00310193	756.958	27.6041	0	1.12027	0.5	1	Null_Model_OpenChrom	human
Pazar_Chip	HSPC	MEIS1	512	273378	0.00187286	280.018	17.9112	0	1.82845	0.5	1	Null_Model_OpenChrom	human
Pazar_Chip	BJ	TERF2	213	273378	0.000779141	137.536	11.3772	0	1.54868	0.5	1	Null_Model_OpenChrom	human
Pazar_Chip	BJ	TERF1	197	273378	0.000720614	155.539	12.4441	0	1.26657	0.5	1	Null_Model_OpenChrom	human
Misc_ChIP	Raji	EBNA1	372	273378	0.00136075	344.025	18.7662	0	1.08132	0.5	1	Null_Model_OpenChrom	EBV
Misc_ChIP	BCells	p65	503	273378	0.00183994	279.193	17.6715	0	1.80162	0.5	1	Null_Model_OpenChrom	human
Cistrome_ChIP	U87GM	EP300	1059	273378	0.00387376	1414.64	37.4496	0	0.748601	0.5	1	Null_Model_OpenChrom	human
Cistrome_ChIP	LoVo	EP300	1158	273378	0.00423589	963.392	31.0463	0	1.202	0.5	1	Null_Model_OpenChrom	human
Cistrome_ChIP	CD34+	NFE2	799	273378	0.00292269	500.389	23.5151	0	1.59676	0.5	1	Null_Model_OpenChrom	human
Cistrome_ChIP	CD34+	GFI1B	1182	273378	0.00432368	391.715	26.5469	0	3.0175	0.5	1	Null_Model_OpenChrom	human
Pazar_Chip	LN229	SOX2	2376	273378	0.00869126	2440.84	49.1085	-1.32043	0.973434	0.906654	1	Null_Model_OpenChrom	human
Pazar_Chip	LNCaP+ethanol	FOXA1	33485	273378	0.122486	34029	169.888	-3.20196	0.984014	0.999318	1	Null_Model_OpenChrom	human
ReMap_ChIP	endoderm	FOXH1	22605	273378	0.0826877	23255	149.812	-4.33895	0.972048	0.999993	1	Null_Model_OpenChrom	human
ReMap_ChIP	c42b_etoh	FOXA1	3816	273378	0.0139587	4161.34	64.3672	-5.36523	0.917011	1	1	Null_Model_OpenChrom	human
Pazar_Chip	H1	SOX2	2890	273378	0.0105714	3203.45	55.8816	-5.60913	0.902153	1	1	Null_Model_OpenChrom	human
ReMap_ChIP	lncap1f5	NR3C1	3127	273378	0.0114384	3470.58	59.3912	-5.78505	0.901002	1	1	Null_Model_OpenChrom	human
TxnFactorChIPV3	A549+DEX_100nM	FOXA1	4629	273378	0.0169326	5110.62	70.5719	-6.82459	0.90576	1	1	Null_Model_OpenChrom	human
Pazar_Chip	LNCaP+DHT	AR	31577	273378	0.115507	32779.2	169.546	-7.0908	0.963324	1	1	Null_Model_OpenChrom	human
ReMap_ChIP	lncap_1f5_dht	AR	2066	273378	0.0075573	2472.97	49.5945	-8.20603	0.835431	1	1	Null_Model_OpenChrom	human
Pazar_Chip	LNCaP+ethanol	AR	7686	273378	0.0281149	8519.25	93.1316	-8.94697	0.902192	1	1	Null_Model_OpenChrom	human
ReMap_ChIP	esc	EOMES	7103	273378	0.0259823	7893.91	88.274	-8.95977	0.899807	1	1	Null_Model_OpenChrom	human
ReMap_ChIP	vcap_dht18hr	ERG	8132	273378	0.0297464	9044.31	96.3808	-9.46569	0.899129	1	1	Null_Model_OpenChrom	human
ReMap_ChIP	caco2_prolif	GATA6	7188	273378	0.0262933	8137.98	90.3154	-10.5185	0.883266	1	1	Null_Model_OpenChrom	human
ReMap_ChIP	endoderm	SMAD2+3	4277	273378	0.015645	5058.91	73.9354	-10.5756	0.845439	1	1	Null_Model_OpenChrom	human
TxnFactorChIPV3	A549+DEX_5nM	NR3C1	7019	273378	0.0256751	7963.63	89.2878	-10.5796	0.881382	1	1	Null_Model_OpenChrom	human
ReMap_ChIP	vcap_dht	AR	32334	273378	0.118276	34584.4	182.579	-12.3259	0.934929	1	1	Null_Model_OpenChrom	human
Pazar_Chip	H1	NANOG	11133	273378	0.0407238	12790.3	116.612	-14.212	0.870426	1	1	Null_Model_OpenChrom	human
ReMap_ChIP	endoderm	SMAD3	5805	273378	0.0212343	7050.73	87.2377	-14.2797	0.823319	1	1	Null_Model_OpenChrom	human
TxnFactorChIPV3	HepG2	EZH2	3577	273378	0.0130844	4659.24	71.7801	-15.0772	0.767722	1	1	Null_Model_OpenChrom	human
ReMap_ChIP	lncap_1f5_dht+dex	AR	9469	273378	0.034637	11160.1	110.85	-15.2557	0.848469	1	1	Null_Model_OpenChrom	human
ReMap_ChIP	lncap	SUZ12	6498	273378	0.0237693	8170.73	95.5578	-17.5049	0.795277	1	1	Null_Model_OpenChrom	human
TxnFactorChIPV3	HSMM	EZH2	1797	273378	0.00657332	2946.64	59.2154	-19.4145	0.609848	1	1	Null_Model_OpenChrom	human
ReMap_ChIP	lncap_dht	FOXA1	20865	273378	0.0763229	24329.9	167.824	-20.6461	0.857586	1	1	Null_Model_OpenChrom	human
ReMap_ChIP	vcap_dht2hr	ERG	9010	273378	0.032958	11441	117.194	-20.7436	0.787517	1	1	Null_Model_OpenChrom	human
TxnFactorChIPV3	NHDF-Ad	EZH2	4817	273378	0.0176203	6718.81	89.2883	-21.2997	0.716942	1	1	Null_Model_OpenChrom	human
Cistrome_ChIP	LX2	SMAD3	13937	273378	0.0509807	17119.4	146.18	-21.7707	0.814104	1	1	Null_Model_OpenChrom	human
ReMap_ChIP	esc	SMARCA4	3678	273378	0.0134539	5444.03	80.9291	-21.822	0.675602	1	1	Null_Model_OpenChrom	human
ReMap_ChIP	fibrobj_post	SOX2	13921	273378	0.0509222	17069.3	143.473	-21.9432	0.81556	1	1	Null_Model_OpenChrom	human
TxnFactorChIPV3	NH-A	EZH2	5399	273378	0.0197492	7672.21	99.4647	-22.8544	0.703709	1	1	Null_Model_OpenChrom	human
TxnFactorChIPV3	NT2-D1	SUZ12	2128	273378	0.00778409	3871.66	74.9206	-23.2735	0.549635	1	1	Null_Model_OpenChrom	human
TxnFactorChIPV3	H1-hESC	SUZ12	2559	273378	0.00936067	4659.5	83.1638	-25.2574	0.5492	1	1	Null_Model_OpenChrom	human
TxnFactorChIPV3	HUVEC	EZH2	4424	273378	0.0161827	7092.69	103.556	-25.7704	0.623741	1	1	Null_Model_OpenChrom	human
TxnFactorChIPV3	NHLF	EZH2	4800	273378	0.0175581	7687.28	110.346	-26.1657	0.624408	1	1	Null_Model_OpenChrom	human
TxnFactorChIPV3	HSMMtube	EZH2	2247	273378	0.00821939	4462.58	83.5143	-26.5293	0.503521	1	1	Null_Model_OpenChrom	human
Pazar_Chip	LNCaP+DHT	FOXA1	19135	273378	0.0699947	24085.4	183.502	-26.9774	0.794465	1	1	Null_Model_OpenChrom	human
TxnFactorChIPV3	HMEC	EZH2	2872	273378	0.0105056	5711.33	99.1442	-28.6384	0.50286	1	1	Null_Model_OpenChrom	human
TxnFactorChIPV3	H1-hESC	EZH2	3344	273378	0.0122321	6495.73	105.654	-29.8307	0.5148	1	1	Null_Model_OpenChrom	human
TxnFactorChIPV3	NHEK	EZH2	4443	273378	0.0162522	8415.16	125.615	-31.6216	0.527976	1	1	Null_Model_OpenChrom	human

## Sheet: EBNA2+ Loop Non TF RELI
Track	Cell	Label	Overlap	Total	Ratio	Mean	STD	Z-score	Enrichment	P-val	Corrected P-val	Null_Model	Species
Roadmapepigenomics_Histone_narrow	CD19_Primary_Cells_Peripheral_UW	H3K27ac	199512	273378	0.729803	41206.4	3545.9	44.6447	4.84178	0	0	Null_Model_OpenChrom	human
GSE62742_Histone	GM19203	H3K27AC	213574	273378	0.781241	53835.7	3578.72	44.6356	3.96715	0	0	Null_Model_OpenChrom	human
GSE62742_Histone	GM19119	H3K27AC	213132	273378	0.779624	56567.8	3507.62	44.6355	3.76773	0	0	Null_Model_OpenChrom	human
Roadmapepigenomics_Histone_narrow	GM12878_Lymphoblastoid	H3K9ac	187904	273378	0.687341	41920.7	3270.57	44.6354	4.48237	0	0	Null_Model_OpenChrom	human
Roadmapepigenomics_ActiveChromatin	CD19_Primary_Peripheral_UW	2_TssAFlnk	145959	273378	0.533909	27001.6	2665.11	44.6351	5.40557	0	0	Null_Model_OpenChrom	human
GSE62742_Histone	GM19101	H3K27AC	210759	273378	0.770944	54988.3	3490.1	44.6321	3.8328	0	0	Null_Model_OpenChrom	human
GSE62742_Histone	GM18519	H3K27AC	212614	273378	0.777729	55768.1	3514.19	44.6321	3.81247	0	0	Null_Model_OpenChrom	human
Roadmapepigenomics_ActiveChromatin	CD19_Primary_Cord_BI	2_TssAFlnk	165097	273378	0.603915	34919	2916.7	44.6319	4.728	0	0	Null_Model_OpenChrom	human
GSE62742_Histone	GM18855	H3K4ME3	189525	273378	0.693271	46188.1	3211.64	44.6305	4.10333	0	0	Null_Model_OpenChrom	human
Roadmapepigenomics_Histone_narrow	CD56_Primary_Cells	H3K27ac	187735	273378	0.686723	45835.3	3179.44	44.6304	4.09586	0	0	Null_Model_OpenChrom	human
Roadmapepigenomics_Histone_narrow	GM12878_Lymphoblastoid	H3K4me3	192137	273378	0.702825	47230.8	3246.83	44.6301	4.06805	0	0	Null_Model_OpenChrom	human
GSE62742_Histone	GM19140	H3K27AC	214093	273378	0.783139	57050.1	3518.78	44.6299	3.75272	0	0	Null_Model_OpenChrom	human
GSE62742_Histone	GM19147	H3K27AC	209950	273378	0.767984	57560.8	3414.52	44.6298	3.64745	0	0	Null_Model_OpenChrom	human
GSE62742_Histone	GM18505	H3K27AC	216377	273378	0.791494	58241.5	3543.28	44.6297	3.71517	0	0	Null_Model_OpenChrom	human
GSE62742_Histone	GM19147	H3K4ME3	178043	273378	0.65127	43141	3022.72	44.6294	4.127	0	0	Null_Model_OpenChrom	human
Roadmapepigenomics_Histone_narrow	CD19_Primary_Cells_Peripheral_UW	H3K4me3	164420	273378	0.601438	36560.3	2864.93	44.6293	4.49723	0	0	Null_Model_OpenChrom	human
GSE62742_Histone	GM19240	H3K27AC	216239	273378	0.790989	61490.3	3467.43	44.6292	3.51664	0	0	Null_Model_OpenChrom	human
GSE62742_Histone	GM18499	H3K27AC	217499	273378	0.795598	60031.8	3528.34	44.6292	3.62306	0	0	Null_Model_OpenChrom	human
Roadmapepigenomics_Histone_narrow	GM12878_Lymphoblastoid	H3K27ac	202720	273378	0.741537	51469	3389.07	44.6291	3.93869	0	0	Null_Model_OpenChrom	human
GSE62742_Histone	GM19119	H3K4ME3	181710	273378	0.664684	42977.2	3108.58	44.629	4.22805	0	0	Null_Model_OpenChrom	human
GSE62742_Histone	GM19152	H3K27AC	210006	273378	0.768189	56053.7	3449.61	44.6289	3.74651	0	0	Null_Model_OpenChrom	human
GSE62742_Histone	GM18855	H3K27AC	218797	273378	0.800346	59035.8	3579.82	44.6283	3.70617	0	0	Null_Model_OpenChrom	human
GSE62742_Histone	GM18489	H3K27AC	213524	273378	0.781058	59259	3456.69	44.6279	3.60323	0	0	Null_Model_OpenChrom	human
GSE62742_Histone	GM19108	H3K27AC	214874	273378	0.785996	59875	3473.18	44.6274	3.58871	0	0	Null_Model_OpenChrom	human
GSE62742_Histone	GM19131	H3K27AC	209261	273378	0.765464	58896	3369.38	44.6269	3.55306	0	0	Null_Model_OpenChrom	human
GSE62742_Histone	GM18517	H3K4ME3	183322	273378	0.670581	44951.1	3100.62	44.6269	4.07826	0	0	Null_Model_OpenChrom	human
GSE62742_Histone	GM19171	H3K27AC	213610	273378	0.781372	59634.4	3450.31	44.6266	3.58199	0	0	Null_Model_OpenChrom	human
GSE62742_Histone	GM18486	H3K4ME3	198010	273378	0.724308	51971	3272.47	44.6265	3.81001	0	0	Null_Model_OpenChrom	human
GSE62742_Histone	GM18505	H3K4ME3	191977	273378	0.70224	47728	3232.38	44.6263	4.02232	0	0	Null_Model_OpenChrom	human
GSE62742_Histone	GM19116	H3K4ME3	188505	273378	0.68954	47591.6	3157.64	44.6262	3.96089	0	0	Null_Model_OpenChrom	human
GSE62742_Histone	GM19160	H3K27AC	203836	273378	0.74562	55734.4	3318.72	44.6261	3.65727	0	0	Null_Model_OpenChrom	human
GSE62742_Histone	GM19257	H3K4ME3	183738	273378	0.672102	45985.7	3086.84	44.6257	3.99555	0	0	Null_Model_OpenChrom	human
GSE62742_Histone	GM18858	H3K27AC	217198	273378	0.794497	62620.3	3463.88	44.6256	3.46849	0	0	Null_Model_OpenChrom	human
GSE62742_Histone	GM19203	H3K4ME3	182465	273378	0.667446	42849.1	3128.62	44.6254	4.25831	0	0	Null_Model_OpenChrom	human
GSE62742_Histone	GM18522	H3K27AC	213848	273378	0.782243	60397	3438.65	44.6254	3.5407	0	0	Null_Model_OpenChrom	human
GSE62742_Histone	GM19223	H3K27AC	211563	273378	0.773885	57546.3	3451.33	44.6253	3.67639	0	0	Null_Model_OpenChrom	human
GSE62742_Histone	GM19144	H3K27AC	214923	273378	0.786175	60397.8	3462.73	44.6252	3.55846	0	0	Null_Model_OpenChrom	human
DNaseClusters	GM06990	Dnase	212873	273378	0.778676	58437.4	3460.74	44.625	3.64275	0	0	Null_Model_OpenChrom	human
GSE62742_Histone	GM18852	H3K27AC	216284	273378	0.791154	60990	3480	44.6247	3.54622	0	0	Null_Model_OpenChrom	human
GSE62742_Histone	GM19140	H3K4ME3	188771	273378	0.690513	46223.7	3194.37	44.6246	4.08386	0	0	Null_Model_OpenChrom	human
GSE62742_Histone	GM18870	H3K27AC	208679	273378	0.763335	58893.5	3356.57	44.6246	3.54333	0	0	Null_Model_OpenChrom	human
GSE62742_Histone	GM19223	H3K4ME3	192026	273378	0.702419	48738.6	3210.97	44.6244	3.93992	0	0	Null_Model_OpenChrom	human
GSE62742_Histone	GM19143	H3K4ME3	186163	273378	0.680973	47502.9	3107.28	44.6243	3.91898	0	0	Null_Model_OpenChrom	human
GSE62742_Histone	GM18862	H3K27AC	208021	273378	0.760928	57885.9	3364.43	44.6242	3.59364	0	0	Null_Model_OpenChrom	human
GSE62742_Histone	GM18499	H3K4ME3	189460	273378	0.693033	47242.6	3187	44.6242	4.01036	0	0	Null_Model_OpenChrom	human
GSE62742_Histone	GM18858	H3K4ME3	188441	273378	0.689306	47419.2	3160.22	44.6241	3.97394	0	0	Null_Model_OpenChrom	human
GSE62742_Histone	GM18486	H3K27AC	213705	273378	0.78172	59129.2	3463.95	44.6241	3.6142	0	0	Null_Model_OpenChrom	human
GSE62742_Histone	GM19137	H3K4ME3	192151	273378	0.702877	49070.7	3206.35	44.624	3.9158	0	0	Null_Model_OpenChrom	human
GSE62742_Histone	GM18522	H3K4ME3	181521	273378	0.663993	45189.2	3055.13	44.6239	4.01691	0	0	Null_Model_OpenChrom	human
GSE62742_Histone	GM18502	H3K27AC	212726	273378	0.778139	58817.1	3449.02	44.6239	3.61674	0	0	Null_Model_OpenChrom	human
GSE62742_Histone	GM19137	H3K27AC	211812	273378	0.774795	59269.5	3418.41	44.6238	3.57371	0	0	Null_Model_OpenChrom	human
GSE62742_Histone	GM19204	H3K27AC	215059	273378	0.786673	60401.2	3465.82	44.6237	3.56051	0	0	Null_Model_OpenChrom	human
GSE62742_Histone	GM19128	H3K27AC	214369	273378	0.784149	59953.5	3460.4	44.6236	3.57559	0	0	Null_Model_OpenChrom	human
GSE62742_Histone	GM19099	H3K27AC	213930	273378	0.782543	59823.8	3453.47	44.6236	3.576	0	0	Null_Model_OpenChrom	human
GSE62742_Histone	GM18508	H3K27AC	212250	273378	0.776398	57466.1	3468.65	44.6236	3.69348	0	0	Null_Model_OpenChrom	human
GSE62742_Histone	GM18916	H3K27AC	208767	273378	0.763657	57420.3	3391.64	44.6235	3.63577	0	0	Null_Model_OpenChrom	human
GSE62742_Histone	GM18519	H3K4ME3	186906	273378	0.683691	46523.2	3145.94	44.6235	4.01748	0	0	Null_Model_OpenChrom	human
GSE62742_Histone	GM18508	H3K4ME3	191580	273378	0.700788	48946.4	3196.38	44.6235	3.91408	0	0	Null_Model_OpenChrom	human
GSE62742_Histone	GM18504	H3K27AC	210872	273378	0.771357	59227.7	3398.31	44.6235	3.56036	0	0	Null_Model_OpenChrom	human
GSE62742_Histone	GM18501	H3K27AC	211564	273378	0.773888	60228.6	3391.38	44.6235	3.51269	0	0	Null_Model_OpenChrom	human
GSE62742_Histone	GM18859	H3K27AC	214593	273378	0.784968	58900.4	3489.03	44.6234	3.64332	0	0	Null_Model_OpenChrom	human
GSE62742_Histone	GM19127	H3K27AC	215257	273378	0.787397	59120.6	3498.99	44.6233	3.64098	0	0	Null_Model_OpenChrom	human
GSE62742_Histone	GM19143	H3K27AC	213797	273378	0.782056	60980	3424.61	44.6232	3.50602	0	0	Null_Model_OpenChrom	human
BroadChromHMM	GM12878	ActivePromoter	122272	273378	0.447263	21883.4	2249.69	44.6232	5.58744	0	0	Null_Model_OpenChrom	human
GSE62742_Histone	GM19153	H3K4ME3	190037	273378	0.695144	49464.5	3150.22	44.6231	3.84189	0	0	Null_Model_OpenChrom	human
GSE62742_Histone	GM19102	H3K4ME3	189760	273378	0.69413	49202	3149.89	44.6231	3.85675	0	0	Null_Model_OpenChrom	human
GSE62742_Histone	GM18510	H3K4ME3	187594	273378	0.686207	46768.5	3155.89	44.6231	4.01111	0	0	Null_Model_OpenChrom	human
GSE62742_Histone	GM18517	H3K27AC	214649	273378	0.785173	59217.7	3483.22	44.6229	3.62474	0	0	Null_Model_OpenChrom	human
GSE62742_Histone	GM19222	H3K4ME3	186763	273378	0.683168	47659.7	3117.32	44.6228	3.91867	0	0	Null_Model_OpenChrom	human
GSE62742_Histone	GM19099	H3K4ME3	190941	273378	0.69845	48745.4	3186.61	44.6228	3.91711	0	0	Null_Model_OpenChrom	human
GSE62742_Histone	GM18510	H3K27AC	212371	273378	0.77684	59556.6	3424.58	44.6228	3.56587	0	0	Null_Model_OpenChrom	human
DNaseClusters	CD20+	Dnase	218044	273378	0.797592	63315.4	3467.49	44.6226	3.44377	0	0	Null_Model_OpenChrom	human
Roadmapepigenomics_ActiveChromatin	CD3_Primary_Peripheral_UW	2_TssAFlnk	136549	273378	0.499488	26479.4	2466.68	44.6225	5.15679	0	0	Null_Model_OpenChrom	human
GSE62742_Histone	GM19222	H3K27AC	214337	273378	0.784032	62270.4	3407.84	44.6225	3.44203	0	0	Null_Model_OpenChrom	human
GSE62742_Histone	GM19101	H3K4ME3	178626	273378	0.653403	42454.8	3051.63	44.6225	4.20744	0	0	Null_Model_OpenChrom	human
GSE62742_Histone	GM19206	H3K27AC	215887	273378	0.789701	60790.8	3475.75	44.6224	3.55131	0	0	Null_Model_OpenChrom	human
GSE62742_Histone	GM19116	H3K27AC	215165	273378	0.78706	60199.3	3472.82	44.6224	3.57421	0	0	Null_Model_OpenChrom	human
GSE62742_Histone	GM19114	H3K27AC	217304	273378	0.794885	61677.9	3487.63	44.6224	3.52321	0	0	Null_Model_OpenChrom	human
GSE62742_Histone	GM18913	H3K27AC	212411	273378	0.776986	60223.2	3410.57	44.6224	3.52706	0	0	Null_Model_OpenChrom	human
GSE62742_Histone	GM18507	H3K27AC	211085	273378	0.772136	58994.2	3408.4	44.6224	3.57806	0	0	Null_Model_OpenChrom	human
GSE62742_Histone	GM19152	H3K4ME3	182302	273378	0.66685	44185.3	3095.25	44.6222	4.12585	0	0	Null_Model_OpenChrom	human
GSE62742_Histone	GM19239	H3K4ME3	200609	273378	0.733815	53780.1	3290.5	44.6221	3.73017	0	0	Null_Model_OpenChrom	human
GSE62742_Histone	GM18853	H3K27AC	210647	273378	0.770534	60787.9	3358.42	44.622	3.46528	0	0	Null_Model_OpenChrom	human
GSE62742_Histone	GM19128	H3K4ME3	188615	273378	0.689942	47196.5	3169.27	44.6219	3.99638	0	0	Null_Model_OpenChrom	human
GSE62742_Histone	GM19153	H3K27AC	215950	273378	0.789932	62518.6	3438.49	44.6218	3.45417	0	0	Null_Model_OpenChrom	human
GSE62742_Histone	GM18516	H3K27AC	210489	273378	0.769956	59446.7	3384.94	44.6218	3.5408	0	0	Null_Model_OpenChrom	human
Roadmapepigenomics_ActiveChromatin	CD4+_CD25+_CD127-_Treg_Primary	2_TssAFlnk	145826	273378	0.533423	31055.9	2572.07	44.6217	4.69559	0	0	Null_Model_OpenChrom	human
GSE62742_Histone	GM19239	H3K27AC	215349	273378	0.787733	59128.7	3501.01	44.6214	3.64204	0	0	Null_Model_OpenChrom	human
GSE62742_Histone	GM19190	H3K4ME3	194448	273378	0.711279	52226.4	3187.29	44.6214	3.72318	0	0	Null_Model_OpenChrom	human
GSE62742_Histone	GM18504	H3K4ME3	187602	273378	0.686237	48077.2	3126.86	44.6214	3.9021	0	0	Null_Model_OpenChrom	human
GSE62742_Histone	GM19114	H3K4ME3	191017	273378	0.698729	48502.5	3193.87	44.6213	3.93829	0	0	Null_Model_OpenChrom	human
GSE62742_Histone	GM18507	H3K4ME3	183126	273378	0.669864	45659.9	3080.74	44.6212	4.01066	0	0	Null_Model_OpenChrom	human
GSE62742_Histone	GM19201	H3K4ME3	190936	273378	0.698432	50517.4	3146.92	44.621	3.77961	0	0	Null_Model_OpenChrom	human
GSE62742_Histone	GM19257	H3K27AC	210964	273378	0.771693	59234	3400.43	44.6208	3.56154	0	0	Null_Model_OpenChrom	human
GSE62742_Histone	GM18859	H3K4ME3	185030	273378	0.676828	45617.8	3124.38	44.6208	4.0561	0	0	Null_Model_OpenChrom	human
GSE62742_Histone	GM18852	H3K4ME3	179536	273378	0.656732	44227.7	3032.42	44.6206	4.05936	0	0	Null_Model_OpenChrom	human
GSE62742_Histone	GM19130	H3K27AC	215131	273378	0.786936	61266.3	3448.3	44.6205	3.51141	0	0	Null_Model_OpenChrom	human
GSE62742_Histone	GM18501	H3K4ME3	188927	273378	0.691083	49081.5	3134.11	44.6205	3.84925	0	0	Null_Model_OpenChrom	human
GSE62742_Histone	GM18913	H3K4ME3	181074	273378	0.662358	45081.6	3047.76	44.6204	4.01658	0	0	Null_Model_OpenChrom	human
GSE62742_Histone	GM19204	H3K4ME3	177722	273378	0.650096	42654.6	3027.07	44.6199	4.16654	0	0	Null_Model_OpenChrom	human
GSE62742_Histone	GM19190	H3K27AC	215788	273378	0.789339	63142.6	3421.03	44.6198	3.41747	0	0	Null_Model_OpenChrom	human
GSE62742_Histone	GM19127	H3K4ME3	189865	273378	0.694515	47476.3	3191.15	44.6198	3.99915	0	0	Null_Model_OpenChrom	human
GSE62742_Histone	GM18511	H3K4ME3	184396	273378	0.674509	46689.4	3086.23	44.6197	3.94942	0	0	Null_Model_OpenChrom	human
Roadmapepigenomics_ActiveChromatin	CD56_Primary	2_TssAFlnk	133065	273378	0.486744	26156.7	2395.99	44.6196	5.08722	0	0	Null_Model_OpenChrom	human
GSE62742_Histone	GM19171	H3K4ME3	190604	273378	0.697218	48908.7	3175.64	44.6195	3.89714	0	0	Null_Model_OpenChrom	human
GSE62742_Histone	GM18861	H3K4ME3	189216	273378	0.692141	48079.5	3163.11	44.6195	3.93548	0	0	Null_Model_OpenChrom	human
GSE62742_Histone	GM19144	H3K4ME3	191763	273378	0.701457	49553.3	3187.17	44.6194	3.86983	0	0	Null_Model_OpenChrom	human
GSE62742_Histone	GM18489	H3K4ME3	190096	273378	0.69536	48868	3165.17	44.6194	3.88999	0	0	Null_Model_OpenChrom	human
GSE62742_Histone	GM19141	H3K27AC	213566	273378	0.781211	61369.8	3411	44.6192	3.47998	0	0	Null_Model_OpenChrom	human
GSE62742_Histone	GM18861	H3K27AC	212130	273378	0.775959	59770.6	3414.66	44.6192	3.54907	0	0	Null_Model_OpenChrom	human
GSE62742_Histone	GM19138	H3K27AC	214466	273378	0.784504	61225.9	3434.42	44.619	3.50286	0	0	Null_Model_OpenChrom	human
GSE62742_Histone	GM18907	H3K27AC	214076	273378	0.783077	62274.4	3402.18	44.619	3.43762	0	0	Null_Model_OpenChrom	human
GSE62742_Histone	GM19130	H3K4ME3	189216	273378	0.692141	48945.6	3143.74	44.6189	3.86584	0	0	Null_Model_OpenChrom	human
Roadmapepigenomics_ActiveChromatin	CD4+_CD25-_IL17-_PMA-Ionomycin_stimulated_MACS_purified_Th_Primary	2_TssAFlnk	150599	273378	0.550882	34707.8	2597.38	44.6186	4.33906	0	0	Null_Model_OpenChrom	human
GSE62742_Histone	GM18912	H3K4ME3	189650	273378	0.693728	49960.5	3130.75	44.6186	3.796	0	0	Null_Model_OpenChrom	human
GSE62742_Histone	GM19160	H3K4ME3	175661	273378	0.642557	43954.8	2951.84	44.6183	3.9964	0	0	Null_Model_OpenChrom	human
GSE62742_Histone	GM18907	H3K4ME3	193592	273378	0.708148	50997	3195.89	44.6182	3.79615	0	0	Null_Model_OpenChrom	human
GSE62742_Histone	GM19138	H3K4ME3	191739	273378	0.70137	50716.4	3160.67	44.618	3.78061	0	0	Null_Model_OpenChrom	human
GSE62742_Histone	GM18909	H3K27AC	212806	273378	0.778431	60029.9	3424.09	44.618	3.545	0	0	Null_Model_OpenChrom	human
GSE62742_Histone	GM18912	H3K27AC	209857	273378	0.767644	58715.3	3387.51	44.6174	3.57415	0	0	Null_Model_OpenChrom	human
GSE62742_Histone	GM19210	H3K4ME3	184553	273378	0.675084	48752.6	3043.67	44.6173	3.7855	0	0	Null_Model_OpenChrom	human
GSE62742_Histone	GM19093	H3K4ME3	187289	273378	0.685092	50172	3073.19	44.6172	3.73294	0	0	Null_Model_OpenChrom	human
GSE62742_Histone	GM19172	H3K27AC	203756	273378	0.745327	56643.1	3297.23	44.6171	3.59719	0	0	Null_Model_OpenChrom	human
GSE62742_Histone	GM18498	H3K27AC	211660	273378	0.774239	63451.7	3321.78	44.6171	3.33576	0	0	Null_Model_OpenChrom	human
GSE62742_Histone	GM19209	H3K27AC	215259	273378	0.787404	61878.9	3437.7	44.617	3.47871	0	0	Null_Model_OpenChrom	human
GSE62742_Histone	GM19102	H3K27AC	214185	273378	0.783476	61774.8	3415.97	44.617	3.46719	0	0	Null_Model_OpenChrom	human
GSE62742_Histone	GM18511	H3K27AC	211767	273378	0.774631	59705.6	3408.16	44.6169	3.54685	0	0	Null_Model_OpenChrom	human
GSE62742_Histone	GM19201	H3K27AC	212615	273378	0.777733	62753.7	3358.85	44.6168	3.38809	0	0	Null_Model_OpenChrom	human
GSE62742_Histone	GM19108	H3K4ME3	188453	273378	0.68935	47116	3167.8	44.6168	3.99977	0	0	Null_Model_OpenChrom	human
GSE62742_Histone	GM19206	H3K4ME3	185432	273378	0.678299	46897.3	3105	44.6167	3.954	0	0	Null_Model_OpenChrom	human
GSE62742_Histone	GM18856	H3K4ME3	186383	273378	0.681778	48940.4	3080.52	44.6167	3.80836	0	0	Null_Model_OpenChrom	human
GSE62742_Histone	GM18516	H3K4ME3	189524	273378	0.693267	49128	3146.71	44.6167	3.85776	0	0	Null_Model_OpenChrom	human
Roadmapepigenomics_ActiveChromatin	CD4_Naive_Primary	2_TssAFlnk	144113	273378	0.527157	31354.7	2527.3	44.6161	4.59622	0	0	Null_Model_OpenChrom	human
GSE62742_Histone	GM18853	H3K4ME3	179587	273378	0.656918	45393.1	3007.74	44.6161	3.95626	0	0	Null_Model_OpenChrom	human
Roadmapepigenomics_Histone_narrow	CD19_Primary_Cells_Cord_BI	H3K4me3	154712	273378	0.565927	34254.2	2699.88	44.616	4.51658	0	0	Null_Model_OpenChrom	human
GSE62742_Histone	GM19131	H3K4ME3	189715	273378	0.693966	49467.3	3143.44	44.616	3.83516	0	0	Null_Model_OpenChrom	human
Roadmapepigenomics_ActiveChromatin	CD19_Primary_Peripheral_UW	7_Enh	212468	273378	0.777195	63694.8	3334.53	44.6159	3.33572	0	0	Null_Model_OpenChrom	human
GSE62742_Histone	GM18498	H3K4ME3	184433	273378	0.674645	49506.7	3024.18	44.6159	3.72542	0	0	Null_Model_OpenChrom	human
GSE62742_Histone	GM18856	H3K27AC	211229	273378	0.772663	62810	3326.61	44.6156	3.36299	0	0	Null_Model_OpenChrom	human
GSE62742_Histone	GM18523	H3K27AC	199964	273378	0.731456	58215.8	3177.1	44.6156	3.43487	0	0	Null_Model_OpenChrom	human
GSE62742_Histone	GM18520	H3K27AC	206910	273378	0.756864	60811.3	3274.61	44.6156	3.40249	0	0	Null_Model_OpenChrom	human
GSE62742_Histone	GM19098	H3K4ME3	187853	273378	0.687155	49158.4	3108.66	44.6155	3.82138	0	0	Null_Model_OpenChrom	human
GSE62742_Histone	GM18502	H3K4ME3	186538	273378	0.682345	47088.5	3125.58	44.6155	3.96144	0	0	Null_Model_OpenChrom	human
Roadmapepigenomics_ActiveChromatin	CD3_Primary_Cord_BI	2_TssAFlnk	146318	273378	0.535222	32473	2551.7	44.6154	4.50583	0	0	Null_Model_OpenChrom	human
Roadmapepigenomics_ActiveChromatin	CD8_Memory_Primary	2_TssAFlnk	138340	273378	0.506039	28678.3	2457.94	44.6153	4.82386	0	0	Null_Model_OpenChrom	human
GSE62742_Histone	GM18870	H3K4ME3	183119	273378	0.669838	46590.5	3060.13	44.6153	3.93039	0	0	Null_Model_OpenChrom	human
GSE62742_Histone	GM19209	H3K4ME3	189940	273378	0.694789	49070.4	3157.44	44.6151	3.87076	0	0	Null_Model_OpenChrom	human
GSE62742_Histone	GM19093	H3K27AC	207609	273378	0.759421	60007.9	3308.32	44.6151	3.4597	0	0	Null_Model_OpenChrom	human
GSE62742_Histone	GM18909	H3K4ME3	185703	273378	0.67929	47787.9	3091.24	44.6148	3.88598	0	0	Null_Model_OpenChrom	human
GSE62742_Histone	GM19238	H3K4ME3	196659	273378	0.719367	55853.4	3156.04	44.6147	3.52099	0	0	Null_Model_OpenChrom	human
GSE62742_Histone	GM18862	H3K4ME3	183997	273378	0.67305	46950.8	3071.78	44.6146	3.91893	0	0	Null_Model_OpenChrom	human
Roadmapepigenomics_Histone_narrow	GM12878_Lymphoblastoid	H2A.Z	191562	273378	0.700722	53195.8	3101.38	44.6144	3.60107	0	0	Null_Model_OpenChrom	human
GSE62742_Histone	GM19207	H3K4ME3	180396	273378	0.659878	47205.5	2985.37	44.6144	3.82151	0	0	Null_Model_OpenChrom	human
Roadmapepigenomics_ActiveChromatin	CD8_Naive_Primary	2_TssAFlnk	136082	273378	0.49778	28113.1	2420.08	44.6137	4.84051	0	0	Null_Model_OpenChrom	human
GSE62742_Histone	GM19141	H3K4ME3	192513	273378	0.704201	50556	3181.93	44.6135	3.80791	0	0	Null_Model_OpenChrom	human
Roadmapepigenomics_ActiveChromatin	CD19_Primary_Cord_BI	7_Enh	194825	273378	0.712658	55660.3	3119.38	44.6129	3.50025	0	0	Null_Model_OpenChrom	human
Roadmapepigenomics_ActiveChromatin	CD19_Primary_Cord_BI	ActiveChromatin	223050	273378	0.815903	72857.9	3366.57	44.6128	3.06144	0	0	Null_Model_OpenChrom	human
GSE62742_Histone	GM19225	H3K27AC	208431	273378	0.762428	60475.9	3316.42	44.6128	3.44651	0	0	Null_Model_OpenChrom	human
Roadmapepigenomics_ActiveChromatin	CD4+_CD25-_CD45RO+_Memory_Primary	2_TssAFlnk	136064	273378	0.497714	28180.5	2418.22	44.6127	4.8283	0	0	Null_Model_OpenChrom	human
GSE62742_Histone	GM19207	H3K27AC	212131	273378	0.775962	64361.5	3312.29	44.6126	3.29593	0	0	Null_Model_OpenChrom	human
GSE62742_Histone	GM19098	H3K27AC	211881	273378	0.775048	62649.8	3345.08	44.6121	3.38199	0	0	Null_Model_OpenChrom	human
Roadmapepigenomics_ActiveChromatin	Dnd41_TCell_Leukemia	2_TssAFlnk	130069	273378	0.475784	27099.1	2308.12	44.612	4.79976	0	0	Null_Model_OpenChrom	human
GSE62742_Histone	GM19092	H3K4ME3	186378	273378	0.681759	50547	3044.72	44.6119	3.68722	0	0	Null_Model_OpenChrom	human
Roadmapepigenomics_ActiveChromatin	CD19_Primary_Peripheral_UW	1_TssA	110420	273378	0.40391	19226.8	2044.15	44.6118	5.74302	0	0	Null_Model_OpenChrom	human
GSE62742_Histone	GM19092	H3K27AC	210542	273378	0.77015	63775.2	3289.86	44.6118	3.30131	0	0	Null_Model_OpenChrom	human
Roadmapepigenomics_Histone_narrow	Peripheral_Blood_Mononuclear_Primary_Cells	H3K27ac	155777	273378	0.569823	36502.2	2673.63	44.6116	4.26761	0	0	Null_Model_OpenChrom	human
GSE62742_Histone	GM19210	H3K27AC	206662	273378	0.755957	60923.9	3266.83	44.6114	3.39213	0	0	Null_Model_OpenChrom	human
GSE62742_Histone	GM19159	H3K4ME3	183989	273378	0.673021	49346.7	3018.11	44.6114	3.72849	0	0	Null_Model_OpenChrom	human
GSE62742_Histone	GM18871	H3K27AC	206387	273378	0.754951	58637.7	3311.92	44.6114	3.5197	0	0	Null_Model_OpenChrom	human
GSE62742_Histone	GM19240	H3K4ME3	203109	273378	0.74296	56814.5	3279.32	44.6113	3.57495	0	0	Null_Model_OpenChrom	human
GSE62742_Histone	GM19225	H3K4ME3	175445	273378	0.641767	44365.7	2938.26	44.6113	3.95452	0	0	Null_Model_OpenChrom	human
GSE62742_Histone	GM18916	H3K4ME3	173922	273378	0.636196	44167.2	2908.57	44.6112	3.93781	0	0	Null_Model_OpenChrom	human
Roadmapepigenomics_ActiveChromatin	CD4_Memory_Primary	2_TssAFlnk	139249	273378	0.509364	30014.1	2448.6	44.6111	4.63946	0	0	Null_Model_OpenChrom	human
Roadmapepigenomics_Histone_narrow	CD19_Primary_Cells_Cord_BI	H3K4me1	221682	273378	0.810899	69520	3410.87	44.6109	3.18875	0	0	Null_Model_OpenChrom	human
GSE62742_Histone	GM18871	H3K4ME3	182811	273378	0.668711	47674.2	3029.27	44.6104	3.83459	0	0	Null_Model_OpenChrom	human
GSE62742_Histone	GM19238	H3K27AC	209702	273378	0.767077	62220.6	3306	44.6103	3.3703	0	0	Null_Model_OpenChrom	human
Roadmapepigenomics_ActiveChromatin	CD14_Primary	1_TssA	104838	273378	0.383491	18485.3	1935.72	44.6102	5.67141	0	0	Null_Model_OpenChrom	human
Roadmapepigenomics_ActiveChromatin	CD4+_CD25-_CD45RA+_Naive_Primary	2_TssAFlnk	147738	273378	0.540417	35146.6	2523.94	44.6093	4.20348	0	0	Null_Model_OpenChrom	human
Roadmapepigenomics_ActiveChromatin	Dnd41_TCell_Leukemia	1_TssA	97949	273378	0.358291	16276.8	1830.86	44.6087	6.01769	0	0	Null_Model_OpenChrom	human
Roadmapepigenomics_Histone_narrow	CD56_Primary_Cells	H3K4me3	149330	273378	0.54624	35681.2	2547.7	44.6083	4.18511	0	0	Null_Model_OpenChrom	human
Roadmapepigenomics_ActiveChromatin	CD3_Primary_Peripheral_UW	1_TssA	105075	273378	0.384358	18545.5	1939.77	44.6082	5.6658	0	0	Null_Model_OpenChrom	human
Roadmapepigenomics_ActiveChromatin	CD4+_CD25-_CD45RO+_Memory_Primary	1_TssA	111410	273378	0.407531	20379.9	2040.68	44.6076	5.46667	0	0	Null_Model_OpenChrom	human
GSE62742_Histone	GM18523	H3K4ME3	172061	273378	0.629389	46414.3	2816.72	44.6075	3.70707	0	0	Null_Model_OpenChrom	human
Roadmapepigenomics_ActiveChromatin	CD8_Memory_Primary	1_TssA	120191	273378	0.439651	23573.2	2165.96	44.6074	5.09863	0	0	Null_Model_OpenChrom	human
Roadmapepigenomics_ActiveChromatin	CD56_Primary	1_TssA	106517	273378	0.389633	19160.5	1958.35	44.6073	5.55921	0	0	Null_Model_OpenChrom	human
Roadmapepigenomics_ActiveChromatin	CD4+_CD25+_CD127-_Treg_Primary	1_TssA	111729	273378	0.408698	21074.5	2032.28	44.6073	5.30163	0	0	Null_Model_OpenChrom	human
GSE62742_Histone	GM18520	H3K4ME3	185975	273378	0.680285	49694.3	3055.13	44.6072	3.74238	0	0	Null_Model_OpenChrom	human
Roadmapepigenomics_ActiveChromatin	CD4+_CD25-_Th_Primary	2_TssAFlnk	144742	273378	0.529457	33110.1	2502.59	44.6066	4.37153	0	0	Null_Model_OpenChrom	human
Roadmapepigenomics_ActiveChromatin	CD14_Primary	2_TssAFlnk	127322	273378	0.465736	25990.4	2271.67	44.6066	4.8988	0	0	Null_Model_OpenChrom	human
GSE62742_Histone	GM19159	H3K27AC	207744	273378	0.759915	63046.5	3243.86	44.6065	3.29509	0	0	Null_Model_OpenChrom	human
Roadmapepigenomics_Histone_narrow	CD8_Naive_Primary_Cells	H3K27ac	153198	273378	0.560389	36083.7	2625.51	44.6064	4.24563	0	0	Null_Model_OpenChrom	human
GSE62742_Histone	GM19172	H3K4ME3	182203	273378	0.666487	48083.4	3006.74	44.6063	3.78932	0	0	Null_Model_OpenChrom	human
Roadmapepigenomics_ActiveChromatin	CD4+_CD25-_IL17+_PMA-Ionomcyin_stimulated_Th17_Primary	2_TssAFlnk	143456	273378	0.524753	33279.2	2470.01	44.6058	4.31069	0	0	Null_Model_OpenChrom	human
Roadmapepigenomics_ActiveChromatin	CD4+_CD25-_IL17-_PMA-Ionomycin_stimulated_MACS_purified_Th_Primary	1_TssA	114813	273378	0.419979	22184.1	2076.62	44.6056	5.17547	0	0	Null_Model_OpenChrom	human
Roadmapepigenomics_ActiveChromatin	CD4_Naive_Primary	1_TssA	121034	273378	0.442735	24578.2	2162.42	44.6055	4.92445	0	0	Null_Model_OpenChrom	human
Roadmapepigenomics_ActiveChromatin	CD15_Primary	2_TssAFlnk	140965	273378	0.515641	32788.9	2425.18	44.6054	4.29917	0	0	Null_Model_OpenChrom	human
Roadmapepigenomics_ActiveChromatin	CD8_Naive_Primary	1_TssA	117030	273378	0.428089	22878.8	2110.77	44.6051	5.11521	0	0	Null_Model_OpenChrom	human
Roadmapepigenomics_Histone_narrow	CD3_Primary_Cells_Peripheral_UWUW	H3K27ac	173836	273378	0.635881	46671.7	2850.93	44.6045	3.72465	0	0	Null_Model_OpenChrom	human
GSE62742_Histone	GM19200	H3K4ME3	187272	273378	0.68503	53771.5	2993.01	44.6041	3.48274	0	0	Null_Model_OpenChrom	human
DNaseI_Duke	GC_B_cell	Dnase	226141	273378	0.82721	76144.9	3362.83	44.6041	2.96988	0	0	Null_Model_OpenChrom	human
DNaseI_Duke	Naive_B_cell	Dnase	217024	273378	0.793861	70741.4	3279.61	44.6036	3.06785	0	0	Null_Model_OpenChrom	human
DNaseClusters	GM12864	Dnase	224020	273378	0.819451	75274.5	3334.86	44.6032	2.97604	0	0	Null_Model_OpenChrom	human
Roadmapepigenomics_Histone_narrow	GM12878_Lymphoblastoid	H3K4me2	219374	273378	0.802457	71122.7	3323.84	44.6024	3.08445	0	0	Null_Model_OpenChrom	human
Roadmapepigenomics_Histone_narrow	CD4+_CD25-_Th_Primary_Cells-I	H3K27ac	159439	273378	0.583218	41105.5	2653.09	44.6021	3.87878	0	0	Null_Model_OpenChrom	human
Roadmapepigenomics_ActiveChromatin	CD4+_CD25int_CD127+_Tmem_Primary	2_TssAFlnk	132136	273378	0.483345	28056.5	2333.51	44.6021	4.70965	0	0	Null_Model_OpenChrom	human
Roadmapepigenomics_Histone_narrow	CD4_Naive_Primary_Cells	H3K27ac	156262	273378	0.571597	38455.9	2641.35	44.6006	4.06341	0	0	Null_Model_OpenChrom	human
Roadmapepigenomics_Histone_narrow	Dnd41_TCell_Leukemia	H3K4me3	141163	273378	0.516366	34497.4	2391.61	44.5999	4.09199	0	0	Null_Model_OpenChrom	human
Roadmapepigenomics_ActiveChromatin	CD4_Memory_Primary	1_TssA	117770	273378	0.430795	23242.7	2119.47	44.5995	5.06698	0	0	Null_Model_OpenChrom	human
Roadmapepigenomics_ActiveChromatin	CD15_Primary	1_TssA	96585	273378	0.353302	16774.1	1789.5	44.5995	5.758	0	0	Null_Model_OpenChrom	human
Roadmapepigenomics_Histone_narrow	CD4+_CD25-_CD45RO+_Memory_Primary_Cells	H3K27ac	158840	273378	0.581027	40097.4	2662.42	44.5994	3.96135	0	0	Null_Model_OpenChrom	human
GSE62742_Histone	GM19200	H3K27AC	206961	273378	0.757051	65315.6	3175.98	44.599	3.16863	0	0	Null_Model_OpenChrom	human
GSE62742_Histone	GM19203	H3K4ME1	225958	273378	0.826541	78754.7	3300.64	44.5984	2.86914	0	0	Null_Model_OpenChrom	human
Roadmapepigenomics_ActiveChromatin	CD3_Primary_Cord_BI	1_TssA	120485	273378	0.440727	24941.9	2142.32	44.5979	4.83062	0	0	Null_Model_OpenChrom	human
Roadmapepigenomics_ActiveChromatin	CD34	2_TssAFlnk	144552	273378	0.528762	34856.9	2459.65	44.5978	4.14701	0	0	Null_Model_OpenChrom	human
Roadmapepigenomics_ActiveChromatin	CD4+_CD25-_IL17+_PMA-Ionomcyin_stimulated_Th17_Primary	3_TxFlnk	89985	273378	0.32916	15603.7	1667.84	44.5975	5.7669	0	0	Null_Model_OpenChrom	human
DNaseClusters	GM12865	Dnase	223725	273378	0.818372	78430	3257.93	44.5973	2.85254	0	0	Null_Model_OpenChrom	human
DNaseClusters	CLL	Dnase	205903	273378	0.753181	66724.6	3120.78	44.5973	3.08586	0	0	Null_Model_OpenChrom	human
Roadmapepigenomics_ActiveChromatin	CD19_Primary_Peripheral_UW	ActiveChromatin	235275	273378	0.860622	84591	3378.78	44.5972	2.78132	0	0	Null_Model_OpenChrom	human
GSE62742_Histone	GM19128	H3K4ME1	233290	273378	0.853361	88439	3248.01	44.5968	2.63786	0	0	Null_Model_OpenChrom	human
Roadmapepigenomics_Histone_narrow	CD4+_CD25-_IL17+_PMA-Ionomcyin_stimulated_Th17_Primary_Cells	H3K27ac	166314	273378	0.608366	47199.9	2670.92	44.5966	3.52361	0	0	Null_Model_OpenChrom	human
Roadmapepigenomics_ActiveChromatin	CD4+_CD25int_CD127+_Tmem_Primary	1_TssA	123920	273378	0.453292	26405.2	2186.61	44.5964	4.69302	0	0	Null_Model_OpenChrom	human
Roadmapepigenomics_ActiveChromatin	CD4+_CD25-_Th_Primary	1_TssA	106478	273378	0.38949	20320.6	1931.94	44.5963	5.23991	0	0	Null_Model_OpenChrom	human
Enhancers_Hnisz2013	CD20	Enhancer	158887	273378	0.581199	41687.3	2628.03	44.596	3.8114	0	0	Null_Model_OpenChrom	human
Roadmapepigenomics_Histone_narrow	CD4_Naive_Primary_Cells	H3K4me3	160155	273378	0.585837	43342.3	2619.37	44.5958	3.69512	0	0	Null_Model_OpenChrom	human
Roadmapepigenomics_Histone_narrow	CD8_Memory_Primary_Cells	H3K4me3	159308	273378	0.582739	42204.4	2625.9	44.5957	3.77468	0	0	Null_Model_OpenChrom	human
BroadChromHMM	H1-hESC	ActivePromoter	94521	273378	0.345752	16607.8	1747.11	44.5956	5.69137	0	0	Null_Model_OpenChrom	human
BroadChromHMM	K562	ActivePromoter	105670	273378	0.386534	20278	1914.82	44.5954	5.21106	0	0	Null_Model_OpenChrom	human
Roadmapepigenomics_Histone_narrow	Dnd41_TCell_Leukemia	H3K9ac	150510	273378	0.550556	38511.6	2511.48	44.5946	3.90817	0	0	Null_Model_OpenChrom	human
Roadmapepigenomics_Histone_narrow	CD4+_CD25-_CD45RA+_Naive_Primary_Cellsd_	H3K27ac	168908	273378	0.617855	48056	2710.04	44.5942	3.51482	0	0	Null_Model_OpenChrom	human
Roadmapepigenomics_Histone_narrow	CD4_Memory_Primary_Cells	H3K4me3	155119	273378	0.567416	41208.4	2554.39	44.5941	3.76426	0	0	Null_Model_OpenChrom	human
Roadmapepigenomics_Histone_narrow	CD4+_CD25+_CD127-_Treg_Primary_CellsTh	H3K27ac	170241	273378	0.622731	47657.6	2748.9	44.5937	3.57217	0	0	Null_Model_OpenChrom	human
Roadmapepigenomics_ActiveChromatin	Fetal_Adrenal_Gland	1_TssA	104606	273378	0.382642	20895.2	1877.19	44.5937	5.00621	0	0	Null_Model_OpenChrom	human
Enhancers_Hnisz2013	CD19_primary	Enhancer	110178	273378	0.403024	22549.5	1965.04	44.5937	4.88604	0	0	Null_Model_OpenChrom	human
Roadmapepigenomics_Histone_narrow	CD3_Primary_Cells_Peripheral_UWUW	H3K4me3	154182	273378	0.563988	40686.3	2545.17	44.5926	3.78953	0	0	Null_Model_OpenChrom	human
Roadmapepigenomics_ActiveChromatin	CD34	1_TssA	101398	273378	0.370908	19063.3	1846.38	44.5926	5.31901	0	0	Null_Model_OpenChrom	human
Roadmapepigenomics_Histone_narrow	CD3_Primary_Cells_Cord_BI	H3K4me3	149146	273378	0.545567	39446.4	2460.05	44.5924	3.78098	0	0	Null_Model_OpenChrom	human
Roadmapepigenomics_Histone_narrow	CD8_Naive_Primary_Cells	H3K4me3	150690	273378	0.551215	39195.5	2500.38	44.5911	3.84458	0	0	Null_Model_OpenChrom	human
Roadmapepigenomics_Histone_narrow	CD19_Primary_Cells_Peripheral_UW	H3K4me1	238826	273378	0.873611	91973.4	3293.45	44.5893	2.59669	0	0	Null_Model_OpenChrom	human
GSE62742_Histone	GM19137	H3K4ME1	225617	273378	0.825293	81880.7	3223.59	44.5889	2.75543	0	0	Null_Model_OpenChrom	human
GSE62742_Histone	GM19140	H3K4ME1	232295	273378	0.849721	85585.7	3290.36	44.5877	2.71418	0	0	Null_Model_OpenChrom	human
Roadmapepigenomics_Histone_narrow	CD4+_CD25int_CD127+_Tmem_Primary_Cellsls	H3K27ac	165114	273378	0.603977	46371.7	2663.13	44.5874	3.56066	0	0	Null_Model_OpenChrom	human
GSE62742_Histone	GM18855	H3K4ME1	235770	273378	0.862432	89953	3270.37	44.5873	2.62104	0	0	Null_Model_OpenChrom	human
BroadChromHMM	GM12878	StrongEnhancer	131951	273378	0.482669	31527	2252.31	44.5871	4.18533	0	0	Null_Model_OpenChrom	human
GSE62742_Histone	GM19223	H3K4ME1	231175	273378	0.845624	86178.1	3252	44.5869	2.68253	0	0	Null_Model_OpenChrom	human
Roadmapepigenomics_Histone_narrow	GM12878_Lymphoblastoid	H3K79me2	150633	273378	0.551006	40079.1	2479.52	44.5868	3.75839	0	0	Null_Model_OpenChrom	human
Roadmapepigenomics_ActiveChromatin	GM12878_Lymphoblastoid	ActiveChromatin	232127	273378	0.849106	87894.5	3234.87	44.5868	2.64097	0	0	Null_Model_OpenChrom	human
Roadmapepigenomics_Histone_narrow	GM12878_Lymphoblastoid	H3K4me1	201926	273378	0.738633	67565.5	3013.49	44.5864	2.9886	0	0	Null_Model_OpenChrom	human
BroadChromHMM	NHEK	ActivePromoter	104896	273378	0.383703	21686.5	1866.25	44.5864	4.83693	0	0	Null_Model_OpenChrom	human
GSE62742_Histone	GM18486	H3K4ME1	230965	273378	0.844856	88033	3205.76	44.586	2.62362	0	0	Null_Model_OpenChrom	human
Roadmapepigenomics_ActiveChromatin	CD4+_CD25-_CD45RA+_Naive_Primary	1_TssA	111257	273378	0.406971	24456.6	1946.82	44.5857	4.54917	0	0	Null_Model_OpenChrom	human
GSE62742_Histone	GM19099	H3K4ME1	232501	273378	0.850474	87731.2	3247.01	44.5856	2.65015	0	0	Null_Model_OpenChrom	human
Roadmapepigenomics_Histone_narrow	CD4+_CD25-_CD45RO+_Memory_Primary_Cells	H3K4me3	156361	273378	0.571959	42673.2	2549.89	44.5853	3.66415	0	0	Null_Model_OpenChrom	human
GSE62742_Histone	GM18508	H3K4ME1	231691	273378	0.847512	87675.4	3230.15	44.5848	2.6426	0	0	Null_Model_OpenChrom	human
Roadmapepigenomics_Histone_narrow	Fetal_Thymus	H3K4me3	149055	273378	0.545234	39285.9	2462.03	44.5847	3.79411	0	0	Null_Model_OpenChrom	human
DNaseClusters	GM18507	Dnase	212809	273378	0.778442	76046.7	3067.47	44.5847	2.7984	0	0	Null_Model_OpenChrom	human
Roadmapepigenomics_Histone_narrow	Thymus	H3K4me3	146720	273378	0.536693	38932.7	2417.62	44.584	3.76856	0	0	Null_Model_OpenChrom	human
GSE62742_Histone	GM18519	H3K4ME1	233253	273378	0.853225	89121.2	3232.86	44.5833	2.61726	0	0	Null_Model_OpenChrom	human
GSE62742_Histone	GM18505	H3K4ME1	234492	273378	0.857757	91602.4	3205.02	44.5831	2.55989	0	0	Null_Model_OpenChrom	human
GSE62742_Histone	GM19204	H3K4ME1	227329	273378	0.831556	85604.6	3178.89	44.5829	2.65557	0	0	Null_Model_OpenChrom	human
Roadmapepigenomics_Histone_narrow	CD8_Memory_Primary_Cells	H3K27ac	160960	273378	0.588782	45226.5	2595.92	44.5828	3.55898	0	0	Null_Model_OpenChrom	human
BroadChromHMM	HepG2	ActivePromoter	105930	273378	0.387485	22020.7	1882.1	44.5827	4.81048	0	0	Null_Model_OpenChrom	human
GSE62742_Histone	GM19119	H3K4ME1	232331	273378	0.849853	87897.6	3239.68	44.5826	2.6432	0	0	Null_Model_OpenChrom	human
GSE62742_Histone	GM19131	H3K4ME1	227919	273378	0.833714	86065.8	3181.81	44.5825	2.64819	0	0	Null_Model_OpenChrom	human
Roadmapepigenomics_ActiveChromatin	CD19_Primary_Cord_BI	1_TssA	95577	273378	0.349615	18408.4	1730.93	44.5822	5.19202	0	0	Null_Model_OpenChrom	human
BroadChromHMM	HUVEC	ActivePromoter	98528	273378	0.360409	19046.7	1782.8	44.5822	5.17296	0	0	Null_Model_OpenChrom	human
Roadmapepigenomics_Histone_narrow	CD4+_CD25int_CD127+_Tmem_Primary_Cellsls	H3K4me3	160033	273378	0.585391	45869.3	2560.75	44.5821	3.48889	0	0	Null_Model_OpenChrom	human
Roadmapepigenomics_Histone_narrow	CD4+_CD25+_CD127-_Treg_Primary_CellsTh	H3K4me3	166279	273378	0.608238	49901.9	2610.4	44.5821	3.33212	0	0	Null_Model_OpenChrom	human
Roadmapepigenomics_Histone_narrow	CD14_Primary_Cells	H3K4me3	137875	273378	0.504338	34574.2	2317.09	44.5821	3.9878	0	0	Null_Model_OpenChrom	human
GSE62742_Histone	GM19147	H3K4ME1	230139	273378	0.841834	87992.1	3188.43	44.5821	2.61545	0	0	Null_Model_OpenChrom	human
Roadmapepigenomics_Histone_narrow	CD4+_CD25-_IL17+_PMA-Ionomcyin_stimulated_Th17_Primary_Cells	H3K4me3	162162	273378	0.593179	47884.7	2563.3	44.582	3.38651	0	0	Null_Model_OpenChrom	human
Roadmapepigenomics_ActiveChromatin	Adult_Liver	1_TssA	110162	273378	0.402966	23517.3	1943.49	44.582	4.6843	0	0	Null_Model_OpenChrom	human
GSE62742_Histone	GM19239	H3K4ME1	233405	273378	0.853781	89086.3	3237.17	44.5818	2.61999	0	0	Null_Model_OpenChrom	human
Roadmapepigenomics_Histone_narrow	CD14_Primary_Cells	H3K27ac	159842	273378	0.584692	45310.4	2569.04	44.5814	3.52771	0	0	Null_Model_OpenChrom	human
Roadmapepigenomics_ActiveChromatin	CD34_Primary	2_TssAFlnk	138022	273378	0.504876	35278.9	2304.62	44.5814	3.91231	0	0	Null_Model_OpenChrom	human
GSE62742_Histone	GM19108	H3K4ME1	230309	273378	0.842456	87522.4	3202.83	44.5814	2.63143	0	0	Null_Model_OpenChrom	human
GSE62742_Histone	GM19116	H3K4ME1	231990	273378	0.848605	91163.3	3158.89	44.5811	2.54477	0	0	Null_Model_OpenChrom	human
BroadChromHMM	HSMM	ActivePromoter	101701	273378	0.372016	20743.1	1815.98	44.5809	4.90289	0	0	Null_Model_OpenChrom	human
GSE62742_Histone	GM18861	H3K4ME1	229942	273378	0.841114	86564.5	3216.14	44.5806	2.65631	0	0	Null_Model_OpenChrom	human
GSE62742_Histone	GM18858	H3K4ME1	233463	273378	0.853993	92381.7	3164.65	44.5803	2.52716	0	0	Null_Model_OpenChrom	human
Roadmapepigenomics_ActiveChromatin	Fetal_Intestine_Small	1_TssA	111229	273378	0.406869	24732.3	1940.25	44.5802	4.49732	0	0	Null_Model_OpenChrom	human
Roadmapepigenomics_ActiveChromatin	Duodenum_Mucosa	2_TssAFlnk	140509	273378	0.513973	37941.7	2300.74	44.5801	3.70328	0	0	Null_Model_OpenChrom	human
BroadChromHMM	NHLF	ActivePromoter	105821	273378	0.387087	22686.2	1864.84	44.58	4.66454	0	0	Null_Model_OpenChrom	human
Roadmapepigenomics_Histone_narrow	Peripheral_Blood_Mononuclear_Primary_Cells	H3K4me3	147167	273378	0.538328	40281.7	2397.64	44.5793	3.65345	0	0	Null_Model_OpenChrom	human
Roadmapepigenomics_Histone_narrow	CD4+_CD25-_CD45RA+_Naive_Primary_Cellsd_	H3K4me3	163530	273378	0.598183	48812	2573.35	44.5793	3.3502	0	0	Null_Model_OpenChrom	human
Roadmapepigenomics_ActiveChromatin	Fetal_Intestine_Large	1_TssA	111476	273378	0.407772	24833	1943.59	44.579	4.48903	0	0	Null_Model_OpenChrom	human
Roadmapepigenomics_Histone_narrow	Dnd41_TCell_Leukemia	H2A.Z	146082	273378	0.534359	40717.5	2363.56	44.5787	3.5877	0	0	Null_Model_OpenChrom	human
GSE62742_Histone	GM19144	H3K4ME1	234634	273378	0.858277	90887.4	3224.56	44.5787	2.58159	0	0	Null_Model_OpenChrom	human
Roadmapepigenomics_Histone_narrow	CD4_Memory_Primary_Cells	H3K27ac	172910	273378	0.632494	53694.2	2674.3	44.5784	3.22028	0	0	Null_Model_OpenChrom	human
GSE62742_Histone	GM19206	H3K4ME1	235882	273378	0.862842	95870.8	3140.79	44.5783	2.46041	0	0	Null_Model_OpenChrom	human
Roadmapepigenomics_ActiveChromatin	Fetal_Adrenal_Gland	2_TssAFlnk	110104	273378	0.402754	24122.1	1928.79	44.5782	4.56445	0	0	Null_Model_OpenChrom	human
GSE62742_Histone	GM19098	H3K4ME1	228457	273378	0.835682	88918.4	3130.2	44.5781	2.56929	0	0	Null_Model_OpenChrom	human
Roadmapepigenomics_Histone_narrow	CD4_Naive_Primary_Cells	H3K9ac	158820	273378	0.580954	46269	2524.81	44.578	3.43253	0	0	Null_Model_OpenChrom	human
GSE62742_Histone	GM18859	H3K4ME1	234754	273378	0.858716	91143.1	3221.57	44.578	2.57566	0	0	Null_Model_OpenChrom	human
GSE62742_Histone	GM18516	H3K4ME1	230536	273378	0.843287	89456.7	3164.78	44.5779	2.57707	0	0	Null_Model_OpenChrom	human
Roadmapepigenomics_Histone_narrow	CD4+_CD25-_Th_Primary_Cells-I	H3K4me3	160105	273378	0.585654	46179	2555.68	44.5776	3.46705	0	0	Null_Model_OpenChrom	human
GSE62742_Histone	GM18517	H3K4ME1	232383	273378	0.850043	89963	3194.88	44.5775	2.5831	0	0	Null_Model_OpenChrom	human
Roadmapepigenomics_ActiveChromatin	Colonic_Mucosa	1_TssA	122818	273378	0.449261	29953.4	2083.24	44.5769	4.10031	0	0	Null_Model_OpenChrom	human
GSE62742_Histone	GM18499	H3K4ME1	234493	273378	0.857761	92728.1	3180.24	44.5768	2.52882	0	0	Null_Model_OpenChrom	human
GSE62742_Histone	GM19152	H3K4ME1	230390	273378	0.842753	88887.5	3174.36	44.5767	2.59193	0	0	Null_Model_OpenChrom	human
GSE62742_Histone	GM19114	H3K4ME1	234664	273378	0.858387	92624.4	3186.45	44.5762	2.5335	0	0	Null_Model_OpenChrom	human
Roadmapepigenomics_Histone_narrow	Dnd41_TCell_Leukemia	H3K4me2	154648	273378	0.565693	44280.7	2475.93	44.576	3.49245	0	0	Null_Model_OpenChrom	human
GSE62742_Histone	GM18489	H3K4ME1	232782	273378	0.851502	92698.8	3142.57	44.576	2.51117	0	0	Null_Model_OpenChrom	human
GSE62742_Histone	GM19225	H3K4ME1	225222	273378	0.823848	87991.6	3078.59	44.5758	2.55959	0	0	Null_Model_OpenChrom	human
GSE62742_Histone	GM18852	H3K4ME1	234238	273378	0.856828	91763.7	3196.24	44.5756	2.55262	0	0	Null_Model_OpenChrom	human
GSE62742_Histone	GM19143	H3K4ME1	232720	273378	0.851276	92921	3136.24	44.5754	2.50449	0	0	Null_Model_OpenChrom	human
GSE62742_Histone	GM19093	H3K4ME1	226204	273378	0.82744	88650.7	3085.86	44.5754	2.55163	0	0	Null_Model_OpenChrom	human
GSE62742_Histone	GM18907	H3K4ME1	226854	273378	0.829818	86647	3145.4	44.5753	2.61814	0	0	Null_Model_OpenChrom	human
Roadmapepigenomics_ActiveChromatin	CD4+_CD25-_CD45RA+_Naive_Primary	3_TxFlnk	66651	273378	0.243805	10260.4	1265.07	44.5752	6.49597	0	0	Null_Model_OpenChrom	human
GSE62742_Histone	GM19101	H3K4ME1	229118	273378	0.8381	85860.7	3213.85	44.575	2.66848	0	0	Null_Model_OpenChrom	human
GSE62742_Histone	GM18507	H3K4ME1	231160	273378	0.845569	90616.1	3152.99	44.5749	2.55098	0	0	Null_Model_OpenChrom	human
Roadmapepigenomics_ActiveChromatin	Fetal_Lung	1_TssA	108740	273378	0.397764	24137.2	1898	44.5748	4.50508	0	0	Null_Model_OpenChrom	human
GSE62742_Histone	GM19127	H3K4ME1	234334	273378	0.857179	91503	3204.3	44.5748	2.56094	0	0	Null_Model_OpenChrom	human
GSE62742_Histone	GM18522	H3K4ME1	232863	273378	0.851799	92854.9	3140.97	44.5748	2.50782	0	0	Null_Model_OpenChrom	human
GSE62742_Histone	GM18912	H3K4ME1	230750	273378	0.844069	90604.6	3144.08	44.5744	2.54678	0	0	Null_Model_OpenChrom	human
Roadmapepigenomics_Histone_narrow	CD4+_CD25-_IL17-_PMA-Ionomycin_stimulated_MACS_purified_Th_Primary_Cells	H3K4me3	166555	273378	0.609248	49790.7	2619.57	44.5738	3.3451	0	0	Null_Model_OpenChrom	human
Roadmapepigenomics_Histone_narrow	CD4+_CD25-_IL17-_PMA-Ionomycin_stimulated_MACS_purified_Th_Primary_Cells	H3K27ac	184687	273378	0.675574	60963.4	2775.71	44.5738	3.02948	0	0	Null_Model_OpenChrom	human
Misc_Histone	NeutrophilCells	H3K27ac	141274	273378	0.516772	37862.9	2320	44.5738	3.73119	0	0	Null_Model_OpenChrom	human
GSE62742_Histone	GM19130	H3K4ME1	231786	273378	0.847859	90809.6	3162.77	44.5737	2.55244	0	0	Null_Model_OpenChrom	human
Roadmapepigenomics_Histone_narrow	CD3_Primary_Cells_Cord_BI	H3K4me1	169080	273378	0.618484	52917.3	2606.09	44.5736	3.19517	0	0	Null_Model_OpenChrom	human
Roadmapepigenomics_Histone_narrow	Thymus	H3K4me1	186921	273378	0.683746	62380.8	2794.04	44.5735	2.99645	0	0	Null_Model_OpenChrom	human
GSE62742_Histone	GM19171	H3K4ME1	232074	273378	0.848912	92426.5	3132.97	44.5734	2.5109	0	0	Null_Model_OpenChrom	human
GSE62742_Histone	GM18510	H3K4ME1	232924	273378	0.852022	90666.8	3191.56	44.5729	2.56901	0	0	Null_Model_OpenChrom	human
Roadmapepigenomics_ActiveChromatin	Adipose_Nuclei	1_TssA	109210	273378	0.399483	25331.8	1881.83	44.5726	4.31117	0	0	Null_Model_OpenChrom	human
GSE62742_Histone	GM18502	H3K4ME1	233478	273378	0.854048	94415.9	3119.9	44.5726	2.47287	0	0	Null_Model_OpenChrom	human
DNaseClusters	Th2	Dnase	177620	273378	0.649723	59142.8	2658.08	44.5724	3.00324	0	0	Null_Model_OpenChrom	human
Roadmapepigenomics_ActiveChromatin	CD56_Primary	7_Enh	186409	273378	0.681873	62147.1	2787.87	44.5723	2.99948	0	0	Null_Model_OpenChrom	human
Roadmapepigenomics_Histone_narrow	Peripheral_Blood_Mononuclear_Primary_Cells	H3K4me1	187436	273378	0.685629	63579.1	2778.83	44.5717	2.94808	0	0	Null_Model_OpenChrom	human
GSE62742_Histone	GM18511	H3K4ME1	228020	273378	0.834083	88924.5	3120.71	44.5717	2.5642	0	0	Null_Model_OpenChrom	human
GSE62742_Histone	GM19201	H3K4ME1	229120	273378	0.838107	91763.7	3081.73	44.5711	2.49685	0	0	Null_Model_OpenChrom	human
GSE62742_Histone	GM18501	H3K4ME1	231063	273378	0.845214	92275.7	3113.85	44.571	2.50405	0	0	Null_Model_OpenChrom	human
GSE62742_Histone	GM19209	H3K4ME1	232271	273378	0.849633	92647.6	3132.62	44.5709	2.50704	0	0	Null_Model_OpenChrom	human
DNaseClusters	GM12878	Dnase	225200	273378	0.823768	92215.2	2983.67	44.5709	2.44211	0	0	Null_Model_OpenChrom	human
Roadmapepigenomics_Histone_narrow	Fetal_Thymus	H3K27ac	191952	273378	0.702149	66068.9	2824.34	44.5708	2.90533	0	0	Null_Model_OpenChrom	human
Roadmapepigenomics_Histone_narrow	Dnd41_TCell_Leukemia	H3K27ac	165355	273378	0.604858	50552.3	2575.74	44.5708	3.27097	0	0	Null_Model_OpenChrom	human
GSE62742_Histone	GM19257	H3K4ME1	230649	273378	0.8437	90476.2	3144.94	44.5708	2.54928	0	0	Null_Model_OpenChrom	human
Roadmapepigenomics_ActiveChromatin	Fetal_Heart	1_TssA	94952	273378	0.347329	19306.9	1697.2	44.5706	4.91804	0	0	Null_Model_OpenChrom	human
GSE62742_Histone	GM18862	H3K4ME1	228948	273378	0.837478	90862.4	3098.13	44.5706	2.51972	0	0	Null_Model_OpenChrom	human
Roadmapepigenomics_Histone_narrow	CD34_Cultured_Cells	H3K4me3	160881	273378	0.588493	49304.5	2503.38	44.5703	3.26301	0	0	Null_Model_OpenChrom	human
Roadmapepigenomics_ActiveChromatin	Thymus	ActiveChromatin	189842	273378	0.69443	66233.9	2773.33	44.5703	2.86624	0	0	Null_Model_OpenChrom	human
GSE62742_Histone	GM19222	H3K4ME1	233761	273378	0.855083	95001.3	3113.28	44.5703	2.46061	0	0	Null_Model_OpenChrom	human
GSE62742_Histone	GM19240	H3K4ME1	233675	273378	0.854769	93056.7	3154.98	44.5702	2.5111	0	0	Null_Model_OpenChrom	human
Roadmapepigenomics_Histone_narrow	Thymus	H3K27ac	187437	273378	0.685633	63764.9	2774.78	44.5701	2.9395	0	0	Null_Model_OpenChrom	human
Roadmapepigenomics_ActiveChromatin	Breast_vHMEC	1_TssA	107078	273378	0.391685	23499.3	1875.22	44.57	4.55665	0	0	Null_Model_OpenChrom	human
BroadChromHMM	HMEC	ActivePromoter	98217	273378	0.359272	19712.4	1761.39	44.5698	4.98249	0	0	Null_Model_OpenChrom	human
Roadmapepigenomics_Histone_narrow	Mobilized_CD34_Primary_Cells_Female	H3K27ac	178284	273378	0.652152	58649.6	2684.25	44.569	3.03982	0	0	Null_Model_OpenChrom	human
Enhancers_Hnisz2013	GM12878	Enhancer	109951	273378	0.402194	25312.6	1899.07	44.5684	4.34372	0	0	Null_Model_OpenChrom	human
GSE62742_Histone	GM19141	H3K4ME1	227599	273378	0.832543	89478.7	3099.09	44.5681	2.54361	0	0	Null_Model_OpenChrom	human
GSE62742_Histone	GM19153	H3K4ME1	233696	273378	0.854846	96156.6	3086.06	44.568	2.43037	0	0	Null_Model_OpenChrom	human
GSE62742_Histone	GM19172	H3K4ME1	228481	273378	0.83577	91242.8	3079.33	44.5676	2.5041	0	0	Null_Model_OpenChrom	human
Roadmapepigenomics_Histone_narrow	CD34_Primary_Cells	H3K4me3	148300	273378	0.542472	43836.5	2343.94	44.5675	3.38303	0	0	Null_Model_OpenChrom	human
Roadmapepigenomics_ActiveChromatin	Brain_Germinal_Matrix	1_TssA	107372	273378	0.39276	25699.2	1832.57	44.5674	4.17802	0	0	Null_Model_OpenChrom	human
Roadmapepigenomics_ActiveChromatin	CD8_Memory_Primary	ActiveChromatin	188002	273378	0.6877	66463.3	2727.08	44.5673	2.82866	0	0	Null_Model_OpenChrom	human
Roadmapepigenomics_ActiveChromatin	CD3_Primary_Peripheral_UW	7_Enh	162681	273378	0.595077	50667.9	2513.35	44.5672	3.21073	0	0	Null_Model_OpenChrom	human
Roadmapepigenomics_ActiveChromatin	Esophagus	1_TssA	117954	273378	0.431469	28639.7	2004.06	44.5667	4.11855	0	0	Null_Model_OpenChrom	human
Roadmapepigenomics_Histone_narrow	CD15_Primary_Cellst_	H3K4me3	159030	273378	0.581722	47778.3	2496.34	44.566	3.3285	0	0	Null_Model_OpenChrom	human
Roadmapepigenomics_ActiveChromatin	Peripheral_Blood_Mononuclear_Primary	ActiveChromatin	183854	273378	0.672527	62832.5	2715.62	44.5651	2.9261	0	0	Null_Model_OpenChrom	human
Roadmapepigenomics_ActiveChromatin	Dnd41_TCell_Leukemia	ActiveChromatin	171227	273378	0.626338	56160.6	2581.98	44.5651	3.04888	0	0	Null_Model_OpenChrom	human
Roadmapepigenomics_ActiveChromatin	CD4+_CD25-_CD45RO+_Memory_Primary	7_Enh	171981	273378	0.629096	56619.5	2588.64	44.5646	3.03749	0	0	Null_Model_OpenChrom	human
GSE62742_Histone	GM18504	H3K4ME1	232380	273378	0.850032	95420.1	3073.29	44.5646	2.43534	0	0	Null_Model_OpenChrom	human
Roadmapepigenomics_ActiveChromatin	CD4+_CD25int_CD127+_Tmem_Primary	ActiveChromatin	177638	273378	0.649789	60168.6	2635.94	44.5645	2.95234	0	0	Null_Model_OpenChrom	human
Roadmapepigenomics_ActiveChromatin	Duodenum_Mucosa	1_TssA	127451	273378	0.466208	32433.5	2132.14	44.5644	3.92961	0	0	Null_Model_OpenChrom	human
GSE62742_Histone	GM18913	H3K4ME1	228391	273378	0.83544	94073.3	3014.01	44.5644	2.4278	0	0	Null_Model_OpenChrom	human
Roadmapepigenomics_ActiveChromatin	CD34_Primary	1_TssA	94674	273378	0.346312	20051.7	1674.49	44.5642	4.72148	0	0	Null_Model_OpenChrom	human
Roadmapepigenomics_ActiveChromatin	Duodenum_Smooth_Muscle	1_TssA	124438	273378	0.455187	32609.2	2060.6	44.5641	3.81604	0	0	Null_Model_OpenChrom	human
GSE62742_Histone	GM19092	H3K4ME1	226069	273378	0.826947	89370.6	3067.47	44.5639	2.52957	0	0	Null_Model_OpenChrom	human
GSE62742_Histone	GM18520	H3K4ME1	226367	273378	0.828037	92026.5	3014.56	44.5638	2.4598	0	0	Null_Model_OpenChrom	human
GSE62742_Histone	GM18853	H3K4ME1	224444	273378	0.821002	89822.6	3020.88	44.5637	2.49875	0	0	Null_Model_OpenChrom	human
Roadmapepigenomics_ActiveChromatin	CD8_Memory_Primary	7_Enh	164547	273378	0.601903	53858.2	2483.84	44.5635	3.05519	0	0	Null_Model_OpenChrom	human
GSE62742_Histone	GM19102	H3K4ME1	230008	273378	0.841355	93099.7	3072.21	44.5634	2.47055	0	0	Null_Model_OpenChrom	human
GSE62742_Histone	GM19210	H3K4ME1	220168	273378	0.805361	87794	2970.47	44.5633	2.50778	0	0	Null_Model_OpenChrom	human
Roadmapepigenomics_ActiveChromatin	Fetal_Intestine_Large	2_TssAFlnk	100554	273378	0.36782	22128.2	1759.88	44.5632	4.54416	0	0	Null_Model_OpenChrom	human
GSE62742_Histone	GM18909	H3K4ME1	233614	273378	0.854546	94216	3128.14	44.5625	2.47956	0	0	Null_Model_OpenChrom	human
Roadmapepigenomics_ActiveChromatin	Fetal_Intestine_Small	2_TssAFlnk	100061	273378	0.366017	22338.8	1744.13	44.5622	4.47924	0	0	Null_Model_OpenChrom	human
Roadmapepigenomics_ActiveChromatin	CD4+_CD25-_IL17+_PMA-Ionomcyin_stimulated_Th17_Primary	1_TssA	95803	273378	0.350442	20335.6	1693.56	44.5613	4.71111	0	0	Null_Model_OpenChrom	human
GSE62742_Histone	GM18856	H3K4ME1	227032	273378	0.830469	92113.4	3027.71	44.5613	2.4647	0	0	Null_Model_OpenChrom	human
Roadmapepigenomics_ActiveChromatin	CD4+_CD25-_CD45RO+_Memory_Primary	ActiveChromatin	185729	273378	0.679385	68771.2	2624.66	44.5611	2.70068	0	0	Null_Model_OpenChrom	human
Roadmapepigenomics_ActiveChromatin	CD4_Naive_Primary	ActiveChromatin	189122	273378	0.691797	68394.2	2709.27	44.561	2.76518	0	0	Null_Model_OpenChrom	human
Roadmapepigenomics_ActiveChromatin	CD4_Naive_Primary	7_Enh	167240	273378	0.611754	55963.6	2497.18	44.5609	2.98837	0	0	Null_Model_OpenChrom	human
Roadmapepigenomics_Histone_narrow	Dnd41_TCell_Leukemia	H3K4me1	176819	273378	0.646793	61412.6	2589.88	44.5605	2.8792	0	0	Null_Model_OpenChrom	human
Roadmapepigenomics_Histone_narrow	ES-WA7_Cell_Line	H3K9ac	95023	273378	0.347588	19647.5	1691.54	44.5604	4.8364	0	0	Null_Model_OpenChrom	human
GSE62742_Histone	GM19159	H3K4ME1	226653	273378	0.829083	91959.6	3022.72	44.5604	2.4647	0	0	Null_Model_OpenChrom	human
GSE62742_Histone	GM19190	H3K4ME1	230262	273378	0.842284	91942.9	3104.09	44.5602	2.5044	0	0	Null_Model_OpenChrom	human
GSE62742_Histone	GM18870	H3K4ME1	229155	273378	0.838235	94812.9	3014.86	44.56	2.41692	0	0	Null_Model_OpenChrom	human
Roadmapepigenomics_ActiveChromatin	CD4_Memory_Primary	ActiveChromatin	189801	273378	0.69428	70701.9	2672.8	44.5596	2.68452	0	0	Null_Model_OpenChrom	human
Roadmapepigenomics_ActiveChromatin	CD4+_CD25+_CD127-_Treg_Primary	ActiveChromatin	186077	273378	0.680658	66059.6	2693.42	44.5595	2.8168	0	0	Null_Model_OpenChrom	human
Roadmapepigenomics_ActiveChromatin	CD8_Naive_Primary	7_Enh	175470	273378	0.641859	59485.2	2602.97	44.5586	2.94981	0	0	Null_Model_OpenChrom	human
Roadmapepigenomics_ActiveChromatin	CD4+_CD25-_Th_Primary	7_Enh	167235	273378	0.611735	56245.4	2490.91	44.5579	2.97331	0	0	Null_Model_OpenChrom	human
GSE62742_Histone	GM18916	H3K4ME1	232878	273378	0.851853	99438.7	2994.76	44.5576	2.34193	0	0	Null_Model_OpenChrom	human
Roadmapepigenomics_ActiveChromatin	Brain_Hippocampus_Middle	1_TssA	121485	273378	0.444385	32652.4	1993.7	44.5566	3.72056	0	0	Null_Model_OpenChrom	human
Roadmapepigenomics_ActiveChromatin	CD4+_CD25int_CD127+_Tmem_Primary	7_Enh	140026	273378	0.512207	41211	2217.75	44.5563	3.39778	0	0	Null_Model_OpenChrom	human
DNaseClusters	GM19239	Dnase	213596	273378	0.781321	84387.3	2899.94	44.5557	2.53114	0	0	Null_Model_OpenChrom	human
GSE62742_Histone	GM19138	H3K4ME1	232029	273378	0.848748	96757.6	3036.01	44.5556	2.39805	0	0	Null_Model_OpenChrom	human
Roadmapepigenomics_Histone_narrow	CD8_Memory_Primary_Cells	H3K4me1	193337	273378	0.707215	72670.5	2708.24	44.5553	2.66046	0	0	Null_Model_OpenChrom	human
Roadmapepigenomics_ActiveChromatin	Colon_Smooth_Muscle	1_TssA	118298	273378	0.432727	30734.3	1965.28	44.5552	3.84905	0	0	Null_Model_OpenChrom	human
GSE62742_Histone	GM19238	H3K4ME1	229586	273378	0.839812	94720.6	3026.94	44.555	2.42382	0	0	Null_Model_OpenChrom	human
Roadmapepigenomics_Histone_narrow	CD34_Primary_Cells	H3K4me1	189284	273378	0.692389	69822.8	2681.22	44.5548	2.71092	0	0	Null_Model_OpenChrom	human
Roadmapepigenomics_ActiveChromatin	Bone_Marrow_Derived_Mesenchymal_Stem_Cell	1_TssA	115176	273378	0.421307	29836.8	1915.39	44.5544	3.8602	0	0	Null_Model_OpenChrom	human
DNaseI_Duke	GM18507	Dnase	211613	273378	0.774067	83711	2870.69	44.5544	2.5279	0	0	Null_Model_OpenChrom	human
GSE62742_Histone	GM19160	H3K4ME1	219218	273378	0.801886	87998.7	2945.18	44.554	2.49115	0	0	Null_Model_OpenChrom	human
Roadmapepigenomics_Histone_narrow	K562_Leukemia	H3K9ac	136009	273378	0.497513	38963.3	2178.17	44.5537	3.4907	0	0	Null_Model_OpenChrom	human
GSE62742_Histone	GM19207	H3K4ME1	227985	273378	0.833955	95317.1	2977.72	44.5535	2.39186	0	0	Null_Model_OpenChrom	human
Roadmapepigenomics_ActiveChromatin	CD4+_CD25-_CD45RA+_Naive_Primary	7_Enh	164384	273378	0.601307	55917.3	2434.6	44.5522	2.93977	0	0	Null_Model_OpenChrom	human
Roadmapepigenomics_Histone_narrow	CD4_Naive_Primary_Cells	H3K4me1	194407	273378	0.711129	74965.8	2680.93	44.5521	2.59327	0	0	Null_Model_OpenChrom	human
Roadmapepigenomics_ActiveChromatin	CD4+_CD25+_CD127-_Treg_Primary	7_Enh	139882	273378	0.51168	41475.2	2208.8	44.5521	3.37267	0	0	Null_Model_OpenChrom	human
Roadmapepigenomics_ActiveChromatin	ES-I3	1_TssA	111593	273378	0.4082	28565.9	1863.6	44.5519	3.90651	0	0	Null_Model_OpenChrom	human
Roadmapepigenomics_ActiveChromatin	4star	1_TssA	109923	273378	0.402092	27257.2	1855.5	44.5517	4.0328	0	0	Null_Model_OpenChrom	human
Roadmapepigenomics_ActiveChromatin	CD4+_CD25-_IL17+_PMA-Ionomcyin_stimulated_Th17_Primary	ActiveChromatin	189761	273378	0.694134	73092.4	2618.73	44.5516	2.59618	0	0	Null_Model_OpenChrom	human
Roadmapepigenomics_Histone_narrow	Rectal_Mucosa.Donor_29	H3K9ac	178087	273378	0.651431	61453.4	2617.95	44.5515	2.89792	0	0	Null_Model_OpenChrom	human
Roadmapepigenomics_Histone_narrow	Spleen	H3K27ac	200489	273378	0.733376	76879.2	2774.57	44.551	2.60785	0	0	Null_Model_OpenChrom	human
Roadmapepigenomics_Dnase_narrow	GM12878_Lymphoblastoid	Dnase	233905	273378	0.85561	102711	2944.82	44.5508	2.27732	0	0	Null_Model_OpenChrom	human
Roadmapepigenomics_Dnase_narrow	CD19_Primary_Cells_Peripheral_UW	Dnase	237711	273378	0.869532	106717	2940.33	44.5507	2.22748	0	0	Null_Model_OpenChrom	human
Roadmapepigenomics_Dnase_narrow	CD3_Primary_Cells_Cord_BI	Dnase	232252	273378	0.849564	100244	2963.13	44.55	2.31686	0	0	Null_Model_OpenChrom	human
Roadmapepigenomics_ActiveChromatin	CD56_Primary	ActiveChromatin	212173	273378	0.776116	83816.5	2881.19	44.5499	2.5314	0	0	Null_Model_OpenChrom	human
Roadmapepigenomics_ActiveChromatin	Chondrocytes_from_Bone_Marrow_Derived_Mesenchymal_Stem_Cell	1_TssA	112454	273378	0.41135	28073.9	1894.07	44.5495	4.00565	0	0	Null_Model_OpenChrom	human
Roadmapepigenomics_Histone_narrow	Mobilized_CD34_Primary_Cells_Female	H3K4me3	166324	273378	0.608403	57141.6	2450.81	44.5494	2.91073	0	0	Null_Model_OpenChrom	human
Roadmapepigenomics_ActiveChromatin	Duodenum_Smooth_Muscle	2_TssAFlnk	111501	273378	0.407864	26777.3	1901.79	44.5494	4.16401	0	0	Null_Model_OpenChrom	human
Roadmapepigenomics_ActiveChromatin	CD4_Memory_Primary	7_Enh	174229	273378	0.637319	60793.9	2546.29	44.5491	2.86589	0	0	Null_Model_OpenChrom	human
Roadmapepigenomics_ActiveChromatin	CD3_Primary_Cord_BI	ActiveChromatin	188936	273378	0.691116	70867.6	2650.31	44.5489	2.66604	0	0	Null_Model_OpenChrom	human
Roadmapepigenomics_ActiveChromatin	Fetal_Brain_Male	2_TssAFlnk	94806	273378	0.346795	21370.6	1648.43	44.5486	4.43628	0	0	Null_Model_OpenChrom	human
Roadmapepigenomics_ActiveChromatin	CD4+_CD25-_IL17+_PMA-Ionomcyin_stimulated_Th17_Primary	7_Enh	160292	273378	0.586338	54662.4	2371.12	44.5484	2.9324	0	0	Null_Model_OpenChrom	human
Roadmapepigenomics_ActiveChromatin	Colonic_Mucosa	2_TssAFlnk	107697	273378	0.393949	26202.9	1829.35	44.5481	4.11012	0	0	Null_Model_OpenChrom	human
GSE62742_Histone	GM18871	H3K4ME1	228604	273378	0.836219	97866.4	2934.76	44.548	2.33588	0	0	Null_Model_OpenChrom	human
Roadmapepigenomics_ActiveChromatin	Breast_vHMEC	2_TssAFlnk	88188	273378	0.322586	18483.6	1564.71	44.5478	4.77114	0	0	Null_Model_OpenChrom	human
GSE62742_Histone	GM19200	H3K4ME1	225360	273378	0.824353	96006.6	2903.72	44.5475	2.34734	0	0	Null_Model_OpenChrom	human
Roadmapepigenomics_Histone_narrow	CD56_Primary_Cells	H3K4me1	220602	273378	0.806949	93172.7	2860.54	44.5473	2.36767	0	0	Null_Model_OpenChrom	human
Roadmapepigenomics_Histone_narrow	Rectal_Mucosa.Donor_29	H3K4me3	180350	273378	0.659709	66820.6	2548.52	44.5471	2.69902	0	0	Null_Model_OpenChrom	human
Roadmapepigenomics_Histone_narrow	CD4+_CD25int_CD127+_Tmem_Primary_Cellsls	H3K4me1	184583	273378	0.675193	68616.9	2603.26	44.5465	2.69005	0	0	Null_Model_OpenChrom	human
GSE62742_Histone	GM18498	H3K4ME1	233473	273378	0.85403	102517	2939.77	44.5464	2.27741	0	0	Null_Model_OpenChrom	human
Roadmapepigenomics_ActiveChromatin	Brain_Cingulate_Gyrus	1_TssA	118583	273378	0.433769	32422.1	1934.2	44.5459	3.65747	0	0	Null_Model_OpenChrom	human
Roadmapepigenomics_Histone_narrow	Monocytes-CD14+_RO01746	H3K4me3	178858	273378	0.654252	65456.8	2545.75	44.5452	2.73246	0	0	Null_Model_OpenChrom	human
Roadmapepigenomics_ActiveChromatin	CD8_Naive_Primary	ActiveChromatin	191617	273378	0.700923	72034.7	2684.53	44.5449	2.66006	0	0	Null_Model_OpenChrom	human
Roadmapepigenomics_Histone_narrow	Fetal_Placenta	H3K4me3	126262	273378	0.461859	35709.6	2032.85	44.5447	3.5358	0	0	Null_Model_OpenChrom	human
Roadmapepigenomics_Histone_narrow	Duodenum_Mucosa	H3K9ac	172585	273378	0.631305	61680.1	2489.8	44.5438	2.79806	0	0	Null_Model_OpenChrom	human
Roadmapepigenomics_Histone_narrow	CD8_Naive_Primary_Cells	H3K4me1	196651	273378	0.719337	79086.9	2639.33	44.5432	2.48652	0	0	Null_Model_OpenChrom	human
Roadmapepigenomics_ActiveChromatin	ES-WA7	1_TssA	112264	273378	0.410655	28649.8	1877.15	44.5432	3.91849	0	0	Null_Model_OpenChrom	human
Roadmapepigenomics_Histone_narrow	CD4_Memory_Primary_Cells	H3K4me1	196110	273378	0.717358	79041.8	2628.2	44.5431	2.48109	0	0	Null_Model_OpenChrom	human
Roadmapepigenomics_ActiveChromatin	Fetal_Lung	2_TssAFlnk	106777	273378	0.390584	27062.8	1789.6	44.543	3.94553	0	0	Null_Model_OpenChrom	human
Roadmapepigenomics_Histone_narrow	CD4+_CD25+_CD127-_Treg_Primary_CellsTh	H3K4me1	195619	273378	0.715562	75628.4	2693.85	44.5425	2.58658	0	0	Null_Model_OpenChrom	human
BroadChromHMM	H1-hESC	WeakPromoter	110106	273378	0.402761	28831.8	1824.66	44.5421	3.8189	0	0	Null_Model_OpenChrom	human
Roadmapepigenomics_Histone_narrow	Rectal_Mucosa.Donor_29	H3K27ac	202822	273378	0.74191	82765	2695.43	44.541	2.45058	0	0	Null_Model_OpenChrom	human
Roadmapepigenomics_ActiveChromatin	Fetal_Brain_Male	1_TssA	86784	273378	0.317451	18764	1527.13	44.541	4.62502	0	0	Null_Model_OpenChrom	human
BroadChromHMM	HSMM	WeakPromoter	108848	273378	0.398159	29118	1790.04	44.541	3.73817	0	0	Null_Model_OpenChrom	human
Roadmapepigenomics_ActiveChromatin	CD4+_CD25-_Th_Primary	ActiveChromatin	195581	273378	0.715423	76704.8	2668.95	44.5404	2.54979	0	0	Null_Model_OpenChrom	human
Roadmapepigenomics_Histone_narrow	Sigmoid_Colon	H3K27ac	205224	273378	0.750697	85215	2694.45	44.5394	2.40831	0	0	Null_Model_OpenChrom	human
Roadmapepigenomics_ActiveChromatin	Brain_Substantia_Nigra	1_TssA	119396	273378	0.436743	32675.5	1947.05	44.5394	3.65399	0	0	Null_Model_OpenChrom	human
DNaseI_Duke	GM12878	Dnase	218524	273378	0.799347	93999.3	2795.84	44.5394	2.32474	0	0	Null_Model_OpenChrom	human
Misc_Histone	NeutrophilCells	H3K4me3	143930	273378	0.526487	44884.5	2223.89	44.537	3.20668	0	0	Null_Model_OpenChrom	human
Roadmapepigenomics_ActiveChromatin	Fetal_Brain_Female	1_TssA	111177	273378	0.406679	29222.4	1840.16	44.5367	3.80452	0	0	Null_Model_OpenChrom	human
Roadmapepigenomics_Histone_narrow	CD4+_CD25-_Th_Primary_Cells-I	H3K4me1	204046	273378	0.746388	85346.6	2665.23	44.5362	2.39079	0	0	Null_Model_OpenChrom	human
Roadmapepigenomics_ActiveChromatin	Brain_Substantia_Nigra	2_TssAFlnk	110692	273378	0.404905	29850.6	1815.19	44.536	3.7082	0	0	Null_Model_OpenChrom	human
DNaseClusters	GM19238	Dnase	219244	273378	0.801981	95454.9	2779.53	44.5359	2.29683	0	0	Null_Model_OpenChrom	human
GSE62742_Histone	GM18523	H3K4ME1	216691	273378	0.792642	93547.2	2765.06	44.5356	2.31638	0	0	Null_Model_OpenChrom	human
Roadmapepigenomics_ActiveChromatin	CD4+_CD25-_IL17-_PMA-Ionomycin_stimulated_MACS_purified_Th_Primary	ActiveChromatin	198718	273378	0.726898	81291.3	2636.72	44.5352	2.44452	0	0	Null_Model_OpenChrom	human
Roadmapepigenomics_ActiveChromatin	Adult_Liver	2_TssAFlnk	122140	273378	0.446781	34989.7	1956.9	44.5349	3.49074	0	0	Null_Model_OpenChrom	human
Roadmapepigenomics_ActiveChromatin	Adipose_Derived_Mesenchymal_Stem_Cell	1_TssA	118195	273378	0.43235	33054.5	1911.77	44.5349	3.57576	0	0	Null_Model_OpenChrom	human
Roadmapepigenomics_ActiveChromatin	Adipose_Nuclei	2_TssAFlnk	133926	273378	0.489893	40947.8	2087.77	44.5346	3.27065	0	0	Null_Model_OpenChrom	human
Roadmapepigenomics_Histone_narrow	Monocytes-CD14+_RO01746	H3K9ac	175171	273378	0.640765	63203.3	2514.18	44.5344	2.77155	0	0	Null_Model_OpenChrom	human
Roadmapepigenomics_ActiveChromatin	Fetal_Muscle_Leg	1_TssA	63619	273378	0.232714	11574.1	1168.66	44.534	5.49668	0	0	Null_Model_OpenChrom	human
Roadmapepigenomics_Histone_narrow	Fetal_Brain_Male	H3K4me3	106821	273378	0.390745	27709.7	1776.43	44.5339	3.85501	0	0	Null_Model_OpenChrom	human
DNaseClusters	Monocytes-CD14+_RO01746	Dnase	194876	273378	0.712844	77606.7	2633.27	44.5337	2.51107	0	0	Null_Model_OpenChrom	human
Roadmapepigenomics_ActiveChromatin	CD4+_CD25-_CD45RA+_Naive_Primary	ActiveChromatin	191233	273378	0.699519	73857.9	2635.66	44.5334	2.5892	0	0	Null_Model_OpenChrom	human
Roadmapepigenomics_Histone_narrow	Monocytes-CD14+_RO01746	H3K4me2	184684	273378	0.675563	71116.5	2550.18	44.5332	2.59692	0	0	Null_Model_OpenChrom	human
Roadmapepigenomics_Histone_narrow	K562_Leukemia	H3K27ac	140249	273378	0.513022	43196	2179.38	44.5324	3.24681	0	0	Null_Model_OpenChrom	human
Roadmapepigenomics_ActiveChromatin	Breast_Myoepithelial	1_TssA	115629	273378	0.422964	30912.6	1902.37	44.5321	3.74052	0	0	Null_Model_OpenChrom	human
Roadmapepigenomics_ActiveChromatin	Brain_Angular_Gyrus	1_TssA	119255	273378	0.436227	34144.2	1911.24	44.5317	3.49269	0	0	Null_Model_OpenChrom	human
Enhancers_Hnisz2013	CD56	Enhancer	106444	273378	0.389366	29222.1	1734.09	44.5316	3.64258	0	0	Null_Model_OpenChrom	human
Roadmapepigenomics_ActiveChromatin	Colon_Smooth_Muscle	2_TssAFlnk	111637	273378	0.408361	30572.5	1820.39	44.5315	3.65155	0	0	Null_Model_OpenChrom	human
Roadmapepigenomics_ActiveChromatin	Fetal_Thymus	ActiveChromatin	210400	273378	0.76963	91556.9	2668.81	44.5304	2.29802	0	0	Null_Model_OpenChrom	human
Roadmapepigenomics_ActiveChromatin	Brain_Dorsolateral_Prefrontal_Cortex	1_TssA	119914	273378	0.438638	34482.6	1918.53	44.5295	3.47752	0	0	Null_Model_OpenChrom	human
Roadmapepigenomics_ActiveChromatin	CD14_Primary	7_Enh	179743	273378	0.657489	69186.8	2482.78	44.5292	2.59794	0	0	Null_Model_OpenChrom	human
BroadChromHMM	GM12878	WeakPromoter	105039	273378	0.384226	27992	1730.26	44.5291	3.75246	0	0	Null_Model_OpenChrom	human
Roadmapepigenomics_ActiveChromatin	CD34_Primary	7_Enh	175376	273378	0.641515	67055.1	2432.75	44.526	2.6154	0	0	Null_Model_OpenChrom	human
Roadmapepigenomics_Histone_narrow	Peripheral_Blood_Mononuclear_Primary_Cells	H3K9ac	195313	273378	0.714443	77942.2	2636.01	44.5259	2.50587	0	0	Null_Model_OpenChrom	human
Roadmapepigenomics_ActiveChromatin	Aorta	1_TssA	117711	273378	0.43058	33302.4	1895.73	44.5257	3.53461	0	0	Null_Model_OpenChrom	human
Roadmapepigenomics_Histone_narrow	CD4+_CD25-_IL17-_PMA-Ionomycin_stimulated_MACS_purified_Th_Primary_Cells	H3K4me1	205860	273378	0.753023	89693.1	2609.02	44.5251	2.29516	0	0	Null_Model_OpenChrom	human
Roadmapepigenomics_Histone_narrow	CD4+_CD25-_CD45RA+_Naive_Primary_Cellsd_	H3K4me1	197313	273378	0.721759	80778.1	2617.3	44.5248	2.44266	0	0	Null_Model_OpenChrom	human
Roadmapepigenomics_Histone_narrow	H1_BMP4_Derived_Mesendoderm_Cultured_Cells	H3K4me3	114836	273378	0.420063	32811.7	1842.23	44.5245	3.49985	0	0	Null_Model_OpenChrom	human
Roadmapepigenomics_Histone_narrow	Small_Intestine	H3K4me3	135645	273378	0.496181	43382.9	2072.17	44.5244	3.12669	0	0	Null_Model_OpenChrom	human
Roadmapepigenomics_ActiveChromatin	Fetal_Brain_Female	2_TssAFlnk	99781	273378	0.364993	26165.5	1653.38	44.5243	3.81345	0	0	Null_Model_OpenChrom	human
Roadmapepigenomics_Histone_narrow	Monocytes-CD14+_RO01746	H3K27ac	188130	273378	0.688168	75148.4	2537.53	44.5242	2.50345	0	0	Null_Model_OpenChrom	human
Roadmapepigenomics_Histone_narrow	CD14_Primary_Cells	H3K4me1	201223	273378	0.736061	86867.5	2568.39	44.5242	2.31644	0	0	Null_Model_OpenChrom	human
Roadmapepigenomics_Histone_narrow	Dnd41_TCell_Leukemia	H3K79me2	133716	273378	0.489125	42770.8	2042.62	44.5239	3.12634	0	0	Null_Model_OpenChrom	human
Enhancers_Hnisz2013	BI_CD4p_CD25-_CD45ROp_Memory	Enhancer	98081	273378	0.358774	25644	1626.93	44.5238	3.82471	0	0	Null_Model_OpenChrom	human
Roadmapepigenomics_Histone_narrow	Aorta	H3K4me3	118508	273378	0.433495	34793.6	1880.23	44.5234	3.40603	0	0	Null_Model_OpenChrom	human
Roadmapepigenomics_ActiveChromatin	Brain_Hippocampus_Middle	2_TssAFlnk	121191	273378	0.443309	36268.4	1907.37	44.5233	3.3415	0	0	Null_Model_OpenChrom	human
Roadmapepigenomics_Histone_narrow	Rectal_Mucosa.Donor_31	H3K9ac	165978	273378	0.607137	61949.3	2336.51	44.5231	2.67926	0	0	Null_Model_OpenChrom	human
Roadmapepigenomics_ActiveChromatin	Brain_Angular_Gyrus	2_TssAFlnk	104566	273378	0.382496	27174.9	1738.22	44.5231	3.84789	0	0	Null_Model_OpenChrom	human
DNaseI_Duke	GM20000	Dnase	212638	273378	0.777817	95037	2641.35	44.523	2.23742	0	0	Null_Model_OpenChrom	human
Roadmapepigenomics_Histone_narrow	NHLF_Lung_Fibroblasts	H3K4me3	123640	273378	0.452268	38203.9	1918.94	44.5225	3.23632	0	0	Null_Model_OpenChrom	human
Roadmapepigenomics_ActiveChromatin	A549_EtOH_0.02pct_Lung_Carcinoma	1_TssA	117566	273378	0.430049	32700.6	1906.14	44.5222	3.59523	0	0	Null_Model_OpenChrom	human
Roadmapepigenomics_Histone_narrow	Fetal_Kidney	H3K9ac	121585	273378	0.44475	35625.9	1930.71	44.522	3.41283	0	0	Null_Model_OpenChrom	human
Roadmapepigenomics_ActiveChromatin	Brain_Dorsolateral_Prefrontal_Cortex	2_TssAFlnk	104331	273378	0.381636	27679.4	1721.66	44.5219	3.76926	0	0	Null_Model_OpenChrom	human
Roadmapepigenomics_Histone_narrow	HepG2_Hepatocellular_Carcinoma	H2A.Z	87021	273378	0.318317	20778	1487.88	44.5218	4.18813	0	0	Null_Model_OpenChrom	human
Roadmapepigenomics_Histone_narrow	Mobilized_CD34_Primary_Cells_Male	H3K4me3	181484	273378	0.663857	69775.7	2509.07	44.5217	2.60096	0	0	Null_Model_OpenChrom	human
Roadmapepigenomics_ActiveChromatin	Brain_Anterior_Caudate	2_TssAFlnk	118157	273378	0.432211	35446.4	1857.77	44.5215	3.3334	0	0	Null_Model_OpenChrom	human
Roadmapepigenomics_Histone_narrow	Duodenum_Mucosa	H3K4me3	175574	273378	0.642239	69783.3	2376.18	44.5214	2.51599	0	0	Null_Model_OpenChrom	human
Roadmapepigenomics_Histone_narrow	Adult_Liver	H3K9ac	159550	273378	0.583624	58619.9	2267	44.5214	2.72177	0	0	Null_Model_OpenChrom	human
Roadmapepigenomics_Histone_narrow	K562_Leukemia	H3K79me2	118019	273378	0.431706	34366.8	1878.93	44.5212	3.4341	0	0	Null_Model_OpenChrom	human
Roadmapepigenomics_ActiveChromatin	Brain_Inferior_Temporal_Lobe	1_TssA	119284	273378	0.436334	34457.6	1905.31	44.521	3.46176	0	0	Null_Model_OpenChrom	human
Roadmapepigenomics_Histone_narrow	Left_Ventricle	H3K4me3	127116	273378	0.464983	39391.6	1970.41	44.5209	3.22698	0	0	Null_Model_OpenChrom	human
Roadmapepigenomics_Histone_narrow	K562_Leukemia	H3K4me3	138920	273378	0.508161	45204.1	2104.99	44.5208	3.07317	0	0	Null_Model_OpenChrom	human
Roadmapepigenomics_ActiveChromatin	CD4+_CD25-_IL17-_PMA-Ionomycin_stimulated_MACS_purified_Th_Primary	7_Enh	158444	273378	0.579578	57015.3	2278.25	44.5204	2.77897	0	0	Null_Model_OpenChrom	human
Roadmapepigenomics_ActiveChromatin	CD3_Primary_Peripheral_UW	ActiveChromatin	200661	273378	0.734006	84616.7	2606.57	44.5199	2.37141	0	0	Null_Model_OpenChrom	human
DNaseI_Duke	GM10248	Dnase	216503	273378	0.791955	96697.6	2691.06	44.5198	2.23897	0	0	Null_Model_OpenChrom	human
Roadmapepigenomics_Histone_narrow	CD4+_CD25-_CD45RO+_Memory_Primary_Cells	H3K4me1	195291	273378	0.714363	80067	2588.16	44.5197	2.43909	0	0	Null_Model_OpenChrom	human
Roadmapepigenomics_ActiveChromatin	Rectal_Mucosa.Donor_29	ActiveChromatin	191640	273378	0.701007	81185.6	2481.03	44.5195	2.36052	0	0	Null_Model_OpenChrom	human
Roadmapepigenomics_ActiveChromatin	Fetal_Heart	2_TssAFlnk	99185	273378	0.362813	26051.5	1642.73	44.5195	3.80727	0	0	Null_Model_OpenChrom	human
Roadmapepigenomics_ActiveChromatin	Brain_Cingulate_Gyrus	2_TssAFlnk	114001	273378	0.417009	31975.8	1842.46	44.5194	3.56523	0	0	Null_Model_OpenChrom	human
Roadmapepigenomics_ActiveChromatin	Brain_Inferior_Temporal_Lobe	2_TssAFlnk	112970	273378	0.413237	32646.4	1804.25	44.519	3.46042	0	0	Null_Model_OpenChrom	human
Roadmapepigenomics_Histone_narrow	Stomach_Mucosa	H3K4me3	135099	273378	0.494184	44918	2025.68	44.5189	3.00768	0	0	Null_Model_OpenChrom	human
Roadmapepigenomics_ActiveChromatin	CD15_Primary	ActiveChromatin	184708	273378	0.675651	73109.6	2506.8	44.5182	2.52645	0	0	Null_Model_OpenChrom	human
Roadmapepigenomics_Histone_narrow	Fetal_Muscle_Trunk	H3K4me3	124505	273378	0.455432	38207.1	1938.49	44.518	3.25869	0	0	Null_Model_OpenChrom	human
Roadmapepigenomics_ActiveChromatin	Brain_Anterior_Caudate	1_TssA	124553	273378	0.455607	38234.5	1938.96	44.518	3.25761	0	0	Null_Model_OpenChrom	human
Roadmapepigenomics_Histone_narrow	CD4+_CD25-_IL17+_PMA-Ionomcyin_stimulated_Th17_Primary_Cells	H3K4me1	195950	273378	0.716773	80762.3	2587.45	44.5178	2.42625	0	0	Null_Model_OpenChrom	human
Roadmapepigenomics_Histone_narrow	Pancreatic_Islets	H3K9ac	129947	273378	0.475338	40936.3	1999.47	44.517	3.17437	0	0	Null_Model_OpenChrom	human
Roadmapepigenomics_Histone_narrow	Rectal_Mucosa.Donor_31	H3K4me3	158782	273378	0.580815	59614.6	2227.64	44.5167	2.66348	0	0	Null_Model_OpenChrom	human
DNaseI_Duke	GM19238	Dnase	217461	273378	0.795459	99128.8	2658.17	44.5165	2.19372	0	0	Null_Model_OpenChrom	human
DNaseI_Duke	CLL	Dnase	213648	273378	0.781511	95648.3	2650.79	44.5149	2.23368	0	0	Null_Model_OpenChrom	human
Roadmapepigenomics_Histone_narrow	Sigmoid_Colon	H3K4me3	139138	273378	0.508958	45137.2	2111.7	44.5144	3.08256	0	0	Null_Model_OpenChrom	human
Roadmapepigenomics_Histone_narrow	CD3_Primary_Cells_Peripheral_UWUW	H3K4me1	209980	273378	0.768094	95472.5	2572.41	44.5138	2.19938	0	0	Null_Model_OpenChrom	human
Roadmapepigenomics_Histone_narrow	CD15_Primary_Cellst_	H3K4me1	188189	273378	0.688384	76152.6	2516.9	44.5137	2.47121	0	0	Null_Model_OpenChrom	human
Roadmapepigenomics_Histone_narrow	Colonic_Mucosa	H3K27ac	189782	273378	0.694211	77920	2513	44.5134	2.4356	0	0	Null_Model_OpenChrom	human
Roadmapepigenomics_Histone_narrow	Fetal_Kidney	H3K4me3	124007	273378	0.45361	38054	1930.99	44.5125	3.25871	0	0	Null_Model_OpenChrom	human
Roadmapepigenomics_ActiveChromatin	CD34_Primary	ActiveChromatin	201825	273378	0.738264	84992.9	2624.72	44.5122	2.37461	0	0	Null_Model_OpenChrom	human
DNaseI_Duke	GM19240	Dnase	214971	273378	0.786351	99049	2604.33	44.5112	2.17035	0	0	Null_Model_OpenChrom	human
BroadChromHMM	HMEC	WeakPromoter	94968	273378	0.347387	25189.7	1567.66	44.5112	3.77011	0	0	Null_Model_OpenChrom	human
Roadmapepigenomics_ActiveChromatin	Fetal_Muscle_Leg	2_TssAFlnk	68010	273378	0.248776	13640.1	1221.49	44.511	4.98605	0	0	Null_Model_OpenChrom	human
Enhancers_Hnisz2013	BI_CD4p_CD25-_CD45RAp_Naive	Enhancer	108167	273378	0.395668	30360.2	1748.04	44.511	3.56279	0	0	Null_Model_OpenChrom	human
Roadmapepigenomics_Histone_narrow	Pancreatic_Islets	H3K4me3	122460	273378	0.447951	37550.7	1907.64	44.51	3.26119	0	0	Null_Model_OpenChrom	human
Roadmapepigenomics_Histone_narrow	Fetal_Muscle_Leg	H3K4me3	128616	273378	0.470469	40367.5	1982.67	44.51	3.18613	0	0	Null_Model_OpenChrom	human
Roadmapepigenomics_Histone_narrow	Small_Intestine	H3K27ac	202844	273378	0.741991	89445.3	2547.72	44.5098	2.2678	0	0	Null_Model_OpenChrom	human
Roadmapepigenomics_Histone_narrow	HepG2_Hepatocellular_Carcinoma	H3K9ac	135399	273378	0.495281	44784.6	2035.84	44.5097	3.02334	0	0	Null_Model_OpenChrom	human
Roadmapepigenomics_Histone_narrow	Monocytes-CD14+_RO01746	H3K79me2	146893	273378	0.537326	51887.1	2134.51	44.5095	2.83101	0	0	Null_Model_OpenChrom	human
Roadmapepigenomics_Histone_narrow	NHLF_Lung_Fibroblasts	H3K9ac	130582	273378	0.477661	43031.7	1967.05	44.5084	3.03456	0	0	Null_Model_OpenChrom	human
DNaseClusters	GM12891	Dnase	212511	273378	0.777352	95866.8	2620.74	44.5082	2.21673	0	0	Null_Model_OpenChrom	human
Roadmapepigenomics_Histone_narrow	Placenta_Amnion	H3K4me3	121323	273378	0.443792	37592.1	1881.26	44.5079	3.22735	0	0	Null_Model_OpenChrom	human
Roadmapepigenomics_ActiveChromatin	CD3_Primary_Cord_BI	7_Enh	141020	273378	0.515843	46943.3	2113.71	44.5078	3.00405	0	0	Null_Model_OpenChrom	human
Roadmapepigenomics_Histone_narrow	Fetal_Intestine_Small	H3K4me3	132570	273378	0.484933	44314.7	1982.94	44.5073	2.99156	0	0	Null_Model_OpenChrom	human
Roadmapepigenomics_Histone_narrow	Fetal_Intestine_Large	H3K4me3	130518	273378	0.477427	42457.3	1978.63	44.506	3.0741	0	0	Null_Model_OpenChrom	human
Roadmapepigenomics_ActiveChromatin	Monocytes-CD14+_RO01746	ActiveChromatin	199961	273378	0.731445	86998.6	2538.14	44.5059	2.29844	0	0	Null_Model_OpenChrom	human
Roadmapepigenomics_ActiveChromatin	Brain_Germinal_Matrix	2_TssAFlnk	103697	273378	0.379317	27858.8	1704.01	44.5057	3.72223	0	0	Null_Model_OpenChrom	human
Roadmapepigenomics_ActiveChromatin	Breast_Myoepithelial	2_TssAFlnk	106553	273378	0.389764	30383.8	1711.46	44.5055	3.50691	0	0	Null_Model_OpenChrom	human
DNaseI_Duke	GM10266	Dnase	208851	273378	0.763964	95648.4	2543.57	44.5055	2.18353	0	0	Null_Model_OpenChrom	human
Roadmapepigenomics_ActiveChromatin	CD15_Primary	7_Enh	148378	273378	0.542758	52956.9	2144.05	44.5052	2.80186	0	0	Null_Model_OpenChrom	human
Roadmapepigenomics_Histone_narrow	Pancreatic_Islets	H3K27ac	128858	273378	0.471355	42440.5	1941.75	44.5049	3.0362	0	0	Null_Model_OpenChrom	human
DNaseClusters	Jurkat	Dnase	197496	273378	0.722428	84904.1	2529.91	44.5043	2.32611	0	0	Null_Model_OpenChrom	human
Roadmapepigenomics_Histone_narrow	Colonic_Mucosa	H3K4me3	165490	273378	0.605352	64319.8	2273.29	44.5039	2.57293	0	0	Null_Model_OpenChrom	human
Roadmapepigenomics_Histone_narrow	Fetal_Stomach	H3K4me3	129959	273378	0.475382	43068.4	1952.45	44.5034	3.0175	0	0	Null_Model_OpenChrom	human
Roadmapepigenomics_Histone_narrow	Fetal_Adrenal_Gland	H3K4me3	127839	273378	0.467627	40997.7	1951.34	44.5034	3.1182	0	0	Null_Model_OpenChrom	human
Roadmapepigenomics_Histone_narrow	Rectal_Mucosa.Donor_31	H3K27ac	183702	273378	0.671971	75461.9	2432.18	44.5033	2.43437	0	0	Null_Model_OpenChrom	human
Roadmapepigenomics_ActiveChromatin	CD14_Primary	ActiveChromatin	201371	273378	0.736603	88328	2540.12	44.5031	2.27981	0	0	Null_Model_OpenChrom	human
Roadmapepigenomics_Histone_narrow	Monocytes-CD14+_RO01746	H3K4me1	205801	273378	0.752807	93980.9	2512.66	44.5027	2.18982	0	0	Null_Model_OpenChrom	human
Roadmapepigenomics_ActiveChromatin	CD34	ActiveChromatin	207729	273378	0.75986	96312.1	2503.61	44.5026	2.15683	0	0	Null_Model_OpenChrom	human
Roadmapepigenomics_Histone_narrow	Adult_Liver	H3K4me3	141108	273378	0.516164	50288	2040.8	44.5021	2.806	0	0	Null_Model_OpenChrom	human
DNaseI_Duke	CD20+_RO01794	Dnase	206475	273378	0.755273	92622.2	2558.39	44.5017	2.22922	0	0	Null_Model_OpenChrom	human
Roadmapepigenomics_Histone_narrow	Psoas_Muscle	H3K4me3	125678	273378	0.459722	41074.9	1901.2	44.4998	3.05973	0	0	Null_Model_OpenChrom	human
Roadmapepigenomics_Histone_narrow	Rectal_Smooth_Muscle	H3K9ac	160768	273378	0.58808	62411	2210.3	44.4993	2.57596	0	0	Null_Model_OpenChrom	human
BroadChromHMM	HUVEC	WeakPromoter	87949	273378	0.321712	22771.1	1464.71	44.4987	3.8623	0	0	Null_Model_OpenChrom	human
Roadmapepigenomics_Histone_narrow	iPS_DF_6.9_Cell_Line	H3K4me3	119480	273378	0.437051	39300.6	1801.89	44.4975	3.04016	0	0	Null_Model_OpenChrom	human
Roadmapepigenomics_Histone_narrow	Colon_Smooth_Muscle	H3K9ac	133558	273378	0.488547	45739.7	1973.58	44.4971	2.91996	0	0	Null_Model_OpenChrom	human
DNaseClusters	CD34+_Mobilized	Dnase	210418	273378	0.769696	97553.6	2536.45	44.497	2.15695	0	0	Null_Model_OpenChrom	human
Roadmapepigenomics_Histone_narrow	H9_Derived_Neuronal_Progenitor_Cultured_Cells	H3K4me3	120945	273378	0.442409	38569.8	1851.26	44.4969	3.13575	0	0	Null_Model_OpenChrom	human
Roadmapepigenomics_Histone_narrow	NHDF-Ad_Adult_Dermal_Fibroblasts	H3K9ac	126358	273378	0.46221	41106.8	1915.9	44.4967	3.07389	0	0	Null_Model_OpenChrom	human
Roadmapepigenomics_Histone_narrow	NHDF-Ad_Adult_Dermal_Fibroblasts	H3K4me3	125801	273378	0.460172	41021.9	1905.32	44.496	3.06668	0	0	Null_Model_OpenChrom	human
DNaseI_Duke	GM19239	Dnase	216212	273378	0.79089	102421	2557.32	44.496	2.11101	0	0	Null_Model_OpenChrom	human
Roadmapepigenomics_Histone_narrow	Rectal_Smooth_Muscle	H3K4me3	167020	273378	0.610949	66954.6	2248.88	44.4957	2.49453	0	0	Null_Model_OpenChrom	human
Roadmapepigenomics_Histone_narrow	Colonic_Mucosa	H3K9ac	175044	273378	0.6403	70994.7	2338.42	44.4955	2.46559	0	0	Null_Model_OpenChrom	human
Roadmapepigenomics_Dnase_narrow	CD14_Primary_Cells	Dnase	201153	273378	0.735805	92283.7	2446.77	44.4952	2.17972	0	0	Null_Model_OpenChrom	human
BroadChromHMM	NHLF	WeakPromoter	98151	273378	0.35903	27050.5	1597.95	44.4947	3.62844	0	0	Null_Model_OpenChrom	human
Enhancers_Hnisz2013	BI_CD4p_CD25-_Il17-_PMAstim_Th	Enhancer	120686	273378	0.441462	39568.2	1823.12	44.4939	3.05007	0	0	Null_Model_OpenChrom	human
Roadmapepigenomics_Histone_narrow	HUVEC_Umbilical_Vein_Endothelial_Cells	H3K4me3	130332	273378	0.476746	44865.1	1920.89	44.4933	2.90498	0	0	Null_Model_OpenChrom	human
Roadmapepigenomics_Dnase_narrow	CD56_Primary_Cells	Dnase	218592	273378	0.799596	102391	2611.75	44.4917	2.13488	0	0	Null_Model_OpenChrom	human
Roadmapepigenomics_Histone_narrow	CD34_Cultured_Cells	H3K4me1	211627	273378	0.774119	101051	2485.33	44.4914	2.09426	0	0	Null_Model_OpenChrom	human
Roadmapepigenomics_ActiveChromatin	Dnd41_TCell_Leukemia	3_TxFlnk	48438	273378	0.177183	8283.56	902.541	44.4905	5.84748	0	0	Null_Model_OpenChrom	human
Roadmapepigenomics_Histone_narrow	Right_Atrium	H3K4me3	130734	273378	0.478217	44775.8	1932.07	44.4901	2.91975	0	0	Null_Model_OpenChrom	human
Roadmapepigenomics_Histone_narrow	iPS-18_Cell_Line	H3K27ac	102533	273378	0.375059	30278.8	1624.09	44.4891	3.38629	0	0	Null_Model_OpenChrom	human
Roadmapepigenomics_Histone_narrow	Duodenum_Smooth_Muscle	H3K27ac	162270	273378	0.593574	64766.3	2191.66	44.4885	2.50547	0	0	Null_Model_OpenChrom	human
Roadmapepigenomics_Histone_narrow	H9_Derived_Neuron_Cultured_Cells	H3K4me3	120095	273378	0.4393	39106.8	1820.5	44.4868	3.07095	0	0	Null_Model_OpenChrom	human
Roadmapepigenomics_Histone_narrow	HMEC_Mammary_Epithelial	H3K4me3	126832	273378	0.463944	42679.8	1891.66	44.4858	2.97171	0	0	Null_Model_OpenChrom	human
DNaseClusters	HL-60	Dnase	193752	273378	0.708733	84394.4	2458.27	44.4855	2.29579	0	0	Null_Model_OpenChrom	human
Roadmapepigenomics_Histone_narrow	CD8_Naive_Primary_Cells	H3K9ac	157094	273378	0.57464	59493.8	2194.01	44.4848	2.64051	0	0	Null_Model_OpenChrom	human
DNaseClusters	NB4	Dnase	190224	273378	0.695828	83506.4	2398.97	44.4848	2.27796	0	0	Null_Model_OpenChrom	human
Misc_Histone	NeutrophilCells	H3K4me1	195111	273378	0.713704	88548.9	2395.48	44.4846	2.20343	0	0	Null_Model_OpenChrom	human
Roadmapepigenomics_Histone_narrow	hESC_Derived_CD56+_Mesoderm_Cultured_Cells	H3K4me3	121222	273378	0.443423	39518.8	1836.67	44.4844	3.06745	0	0	Null_Model_OpenChrom	human
DNaseClusters	GM19240	Dnase	223216	273378	0.81651	108576	2577.15	44.4833	2.05585	0	0	Null_Model_OpenChrom	human
Roadmapepigenomics_Histone_narrow	Esophagus	H3K4me3	136681	273378	0.499971	48367.5	1985.34	44.4829	2.82589	0	0	Null_Model_OpenChrom	human
Roadmapepigenomics_ActiveChromatin	Sigmoid_Colon	ActiveChromatin	181263	273378	0.663049	78117.9	2318.78	44.4824	2.32038	0	0	Null_Model_OpenChrom	human
Roadmapepigenomics_Histone_narrow	Breast_vHMEC	H3K4me3	124418	273378	0.455113	41118.2	1872.69	44.4814	3.02586	0	0	Null_Model_OpenChrom	human
Roadmapepigenomics_Histone_narrow	HepG2_Hepatocellular_Carcinoma	H3K27ac	130017	273378	0.475594	44557.4	1921.26	44.481	2.91797	0	0	Null_Model_OpenChrom	human
Roadmapepigenomics_Histone_narrow	Pancreas	H3K4me3	130725	273378	0.478184	47141.5	1879.1	44.4806	2.77304	0	0	Null_Model_OpenChrom	human
Roadmapepigenomics_Histone_narrow	H1_BMP4_Derived_Mesendoderm_Cultured_Cells	H3K4me2	119850	273378	0.438404	38794.9	1822.26	44.4806	3.08933	0	0	Null_Model_OpenChrom	human
Roadmapepigenomics_Histone_narrow	Penis_Foreskin_Melanocyte_Primary_Cells_skin03	H3K4me3	130515	273378	0.477416	45109.6	1920.1	44.4797	2.89329	0	0	Null_Model_OpenChrom	human
Roadmapepigenomics_ActiveChromatin	Mobilized_CD34_Primary_Female	ActiveChromatin	206824	273378	0.75655	99948.5	2402.8	44.4795	2.06931	0	0	Null_Model_OpenChrom	human
Enhancers_Hnisz2013	CD8_primary	Enhancer	98660	273378	0.360892	29429.4	1556.47	44.4792	3.35243	0	0	Null_Model_OpenChrom	human
Roadmapepigenomics_Histone_narrow	hESC_Derived_CD184+_Endoderm_Cultured_Cells	H3K9ac	126644	273378	0.463256	44196.9	1853.65	44.4782	2.86545	0	0	Null_Model_OpenChrom	human
Roadmapepigenomics_ActiveChromatin	Chondrocytes_from_Bone_Marrow_Derived_Mesenchymal_Stem_Cell	2_TssAFlnk	128516	273378	0.470104	44517.6	1888.57	44.4773	2.88686	0	0	Null_Model_OpenChrom	human
DNaseClusters	CMK	Dnase	176560	273378	0.645846	75561.2	2270.82	44.4769	2.33665	0	0	Null_Model_OpenChrom	human
Roadmapepigenomics_ActiveChromatin	Small_Intestine	ActiveChromatin	164337	273378	0.601135	65487.9	2222.53	44.476	2.50943	0	0	Null_Model_OpenChrom	human
DNaseClusters	GM12892	Dnase	213743	273378	0.781859	104183	2463.37	44.4755	2.05161	0	0	Null_Model_OpenChrom	human
Enhancers_Hnisz2013	BI_CD4_Memory_Primary_7pool	Enhancer	119832	273378	0.438338	40106	1792.59	44.4753	2.98789	0	0	Null_Model_OpenChrom	human
Roadmapepigenomics_Histone_narrow	K562_Leukemia	H3K4me2	155870	273378	0.570163	60332.8	2148.1	44.4752	2.5835	0	0	Null_Model_OpenChrom	human
Roadmapepigenomics_Histone_narrow	Stomach_Mucosa	H3K9ac	164405	273378	0.601383	67578.7	2177.09	44.4751	2.43279	0	0	Null_Model_OpenChrom	human
Roadmapepigenomics_Histone_narrow	Stomach_Smooth_Muscle	H3K9ac	141234	273378	0.516625	51500.8	2017.69	44.4732	2.74237	0	0	Null_Model_OpenChrom	human
DNaseI_Duke	GM13976	Dnase	211508	273378	0.773683	103480	2429.06	44.4732	2.04395	0	0	Null_Model_OpenChrom	human
Roadmapepigenomics_ActiveChromatin	Duodenum_Mucosa	ActiveChromatin	199244	273378	0.728822	94879.9	2346.69	44.473	2.09996	0	0	Null_Model_OpenChrom	human
Roadmapepigenomics_Histone_narrow	K562_Leukemia	H2A.Z	155720	273378	0.569614	60523.1	2140.61	44.4719	2.5729	0	0	Null_Model_OpenChrom	human
Roadmapepigenomics_Histone_narrow	IMR90_Cell_Line	H3K4me3	128741	273378	0.470927	44390.1	1896.73	44.4718	2.90022	0	0	Null_Model_OpenChrom	human
Roadmapepigenomics_ActiveChromatin	Colonic_Mucosa	ActiveChromatin	172792	273378	0.632063	73920.3	2223.26	44.4715	2.33754	0	0	Null_Model_OpenChrom	human
DNaseI_Duke	GM13977	Dnase	206509	273378	0.755397	99342.1	2409.84	44.4705	2.07877	0	0	Null_Model_OpenChrom	human
Roadmapepigenomics_Histone_narrow	Gastric	H3K27ac	153505	273378	0.561512	59199.6	2120.63	44.4704	2.59301	0	0	Null_Model_OpenChrom	human
Roadmapepigenomics_Histone_narrow	Monocytes-CD14+_RO01746	H2A.Z	181239	273378	0.662961	80451.7	2266.42	44.4699	2.25277	0	0	Null_Model_OpenChrom	human
Roadmapepigenomics_Histone_narrow	NHDF-Ad_Adult_Dermal_Fibroblasts	H2A.Z	131089	273378	0.479516	46924.7	1892.7	44.4677	2.7936	0	0	Null_Model_OpenChrom	human
Roadmapepigenomics_Histone_narrow	Penis_Foreskin_Melanocyte_Primary_Cells_skin01	H3K4me3	135004	273378	0.493836	48740.9	1939.94	44.4668	2.76983	0	0	Null_Model_OpenChrom	human
Roadmapepigenomics_Histone_narrow	HepG2_Hepatocellular_Carcinoma	H3K79me2	95955	273378	0.350998	28028.1	1527.6	44.4665	3.42353	0	0	Null_Model_OpenChrom	human
Roadmapepigenomics_ActiveChromatin	Dnd41_TCell_Leukemia	7_Enh	117494	273378	0.429786	39783.6	1747.63	44.4661	2.95333	0	0	Null_Model_OpenChrom	human
Roadmapepigenomics_ActiveChromatin	4star	2_TssAFlnk	78564	273378	0.287382	20050.9	1315.92	44.4656	3.91823	0	0	Null_Model_OpenChrom	human
Roadmapepigenomics_Histone_narrow	Right_Ventricle	H3K4me3	131688	273378	0.481707	47213.2	1899.81	44.4648	2.78922	0	0	Null_Model_OpenChrom	human
Roadmapepigenomics_Histone_narrow	Fetal_Thymus	H3K4me1	224680	273378	0.821866	114758	2472.14	44.4645	1.95787	0	0	Null_Model_OpenChrom	human
Roadmapepigenomics_ActiveChromatin	Rectal_Mucosa.Donor_31	ActiveChromatin	183588	273378	0.671554	85704	2201.39	44.4645	2.14212	0	0	Null_Model_OpenChrom	human
Roadmapepigenomics_Histone_narrow	Rectal_Mucosa.Donor_29	H3K4me1	202401	273378	0.74037	95258.1	2409.63	44.4644	2.12476	0	0	Null_Model_OpenChrom	human
BroadChromHMM	K562	StrongEnhancer	108452	273378	0.396711	34075.4	1672.8	44.4623	3.18271	0	0	Null_Model_OpenChrom	human
Roadmapepigenomics_Histone_narrow	Duodenum_Smooth_Muscle	H3K4me3	153324	273378	0.56085	61654.4	2061.75	44.462	2.48683	0	0	Null_Model_OpenChrom	human
BroadChromHMM	HepG2	WeakPromoter	117530	273378	0.429918	40115.9	1741.22	44.4598	2.92976	0	0	Null_Model_OpenChrom	human
Roadmapepigenomics_Histone_narrow	Neurosphere_Cultured_Cells_Cortex_Derived	H3K4me3	125879	273378	0.460458	44677.2	1826.43	44.4593	2.81752	0	0	Null_Model_OpenChrom	human
Roadmapepigenomics_Histone_narrow	HUVEC_Umbilical_Vein_Endothelial_Cells	H3K9ac	137217	273378	0.501931	51671.2	1924.15	44.4589	2.65558	0	0	Null_Model_OpenChrom	human
Roadmapepigenomics_Histone_narrow	HSMM_Skeletal_Muscle_Myoblasts	H3K4me3	133754	273378	0.489264	49500.1	1895.11	44.4585	2.7021	0	0	Null_Model_OpenChrom	human
Roadmapepigenomics_Histone_narrow	HepG2_Hepatocellular_Carcinoma	H3K4me3	143027	273378	0.523184	54764.8	1985.31	44.4576	2.61166	0	0	Null_Model_OpenChrom	human
Roadmapepigenomics_Histone_narrow	HeLa-S3_Cervical_Carcinoma	H3K9ac	142432	273378	0.521008	55234.3	1961.39	44.4571	2.57869	0	0	Null_Model_OpenChrom	human
Roadmapepigenomics_Histone_narrow	Adipose_Nuclei	H3K4me3	155505	273378	0.568828	64197.6	2053.88	44.4561	2.42229	0	0	Null_Model_OpenChrom	human
EBV_Enhancers	LCLs	EnhancersT3	31116	273378	0.11382	4350.97	602.055	44.4561	7.15151	0	0	Null_Model_OpenChrom	human
Roadmapepigenomics_Histone_narrow	H1_Cell_Line	H3K4me3	123030	273378	0.450036	43478.2	1789.46	44.4557	2.82969	0	0	Null_Model_OpenChrom	human
Roadmapepigenomics_Histone_narrow	Adipose_Nuclei	H3K9ac	165690	273378	0.606084	70888.9	2132.5	44.4554	2.33732	0	0	Null_Model_OpenChrom	human
Roadmapepigenomics_Histone_narrow	H1_BMP4_Derived_Trophoblast_Cultured_Cells	H3K4me2	127926	273378	0.467945	47141.6	1817.21	44.4553	2.71365	0	0	Null_Model_OpenChrom	human
Roadmapepigenomics_Histone_narrow	Ovary	H3K4me3	122027	273378	0.446367	43405	1768.58	44.4549	2.81136	0	0	Null_Model_OpenChrom	human
Roadmapepigenomics_Dnase_narrow	CD3_Primary_Cells_Peripheral_UWUW	Dnase	215640	273378	0.788798	108688	2405.86	44.4547	1.98403	0	0	Null_Model_OpenChrom	human
Roadmapepigenomics_Histone_narrow	NHLF_Lung_Fibroblasts	H2A.Z	134495	273378	0.491974	51274.2	1872.05	44.4545	2.62305	0	0	Null_Model_OpenChrom	human
Roadmapepigenomics_ActiveChromatin	Mobilized_CD34_Primary_Male	ActiveChromatin	210001	273378	0.768171	105680	2346.69	44.4544	1.98713	0	0	Null_Model_OpenChrom	human
Roadmapepigenomics_Histone_narrow	Mobilized_CD34_Primary_Cells_Male	H3K4me1	212005	273378	0.775501	107633	2347.9	44.4535	1.96971	0	0	Null_Model_OpenChrom	human
EBV_Enhancers	LCLs_Tier3	none	31116	273378	0.11382	4351.98	602.072	44.4532	7.14985	0	0	Null_Model_OpenChrom	human
Roadmapepigenomics_Histone_narrow	HSMM_Skeletal_Muscle_Myoblasts	H3K9ac	127795	273378	0.467466	45887.4	1842.75	44.4486	2.78497	0	0	Null_Model_OpenChrom	human
Roadmapepigenomics_Histone_narrow	H9_Cell_Line	H3K4me3	127893	273378	0.467825	47920.6	1799.26	44.4473	2.66885	0	0	Null_Model_OpenChrom	human
Enhancers_Hnisz2013	BI_CD8_Memory_7pool	Enhancer	88898	273378	0.325183	25684	1422.22	44.4473	3.46122	0	0	Null_Model_OpenChrom	human
BroadChromHMM	GM12878	WeakEnhancer	167788	273378	0.613758	72173.4	2151.22	44.4467	2.32479	0	0	Null_Model_OpenChrom	human
Roadmapepigenomics_Histone_narrow	HeLa-S3_Cervical_Carcinoma	H3K79me2	126332	273378	0.462115	47028.7	1784.25	44.4464	2.68627	0	0	Null_Model_OpenChrom	human
Roadmapepigenomics_Histone_narrow	Brain_Substantia_Nigra	H3K9ac	157913	273378	0.577636	67887.5	2025.49	44.4462	2.3261	0	0	Null_Model_OpenChrom	human
Roadmapepigenomics_Histone_narrow	Lung	H3K4me3	136337	273378	0.498712	54303.1	1845.79	44.4437	2.51067	0	0	Null_Model_OpenChrom	human
Roadmapepigenomics_Histone_narrow	HUES48_Cell_Line	H3K9ac	132336	273378	0.484077	48794	1879.73	44.4435	2.71214	0	0	Null_Model_OpenChrom	human
Roadmapepigenomics_ActiveChromatin	Esophagus	2_TssAFlnk	71282	273378	0.260745	18072.9	1197.24	44.4431	3.94413	0	0	Null_Model_OpenChrom	human
BroadChromHMM	NHEK	WeakPromoter	85639	273378	0.313262	24190.9	1382.65	44.4422	3.54013	0	0	Null_Model_OpenChrom	human
Roadmapepigenomics_Histone_narrow	HMEC_Mammary_Epithelial	H3K9ac	135376	273378	0.495197	53143.4	1850.33	44.4421	2.54737	0	0	Null_Model_OpenChrom	human
Roadmapepigenomics_Histone_narrow	Skeletal_Muscle_Male	H3K4me3	150078	273378	0.548976	61771.2	1987.04	44.4414	2.42958	0	0	Null_Model_OpenChrom	human
DNaseI_Duke	Adult_CD4_Th0	Dnase	190139	273378	0.695517	92443.6	2198.3	44.4414	2.05681	0	0	Null_Model_OpenChrom	human
DNaseClusters	Urothelia	Dnase	190721	273378	0.697646	91289.5	2237.36	44.4414	2.08919	0	0	Null_Model_OpenChrom	human
Roadmapepigenomics_Histone_narrow	Adult_Liver	H3K27ac	174131	273378	0.636961	76448.3	2198.04	44.4407	2.27776	0	0	Null_Model_OpenChrom	human
Roadmapepigenomics_ActiveChromatin	K562_Leukemia	ActiveChromatin	179021	273378	0.654848	83598.2	2147.22	44.4401	2.14145	0	0	Null_Model_OpenChrom	human
Roadmapepigenomics_Histone_narrow	H1_Cell_Line	H3K9ac	139029	273378	0.50856	54683	1897.99	44.4397	2.54245	0	0	Null_Model_OpenChrom	human
Roadmapepigenomics_Histone_narrow	H1_BMP4_Derived_Trophoblast_Cultured_Cells	H3K9ac	116929	273378	0.427719	42033.6	1685.37	44.4386	2.7818	0	0	Null_Model_OpenChrom	human
Roadmapepigenomics_Histone_narrow	Fetal_Lung	H3K4me3	136628	273378	0.499777	54092.7	1857.31	44.4382	2.52581	0	0	Null_Model_OpenChrom	human
Roadmapepigenomics_Histone_narrow	Brain_Substantia_Nigra	H3K4me3	146557	273378	0.536097	60386.1	1939.13	44.438	2.427	0	0	Null_Model_OpenChrom	human
Roadmapepigenomics_Histone_narrow	Pancreas	H3K27ac	139764	273378	0.511248	55092.5	1905.4	44.4377	2.5369	0	0	Null_Model_OpenChrom	human
Roadmapepigenomics_Histone_narrow	NHEK-Epidermal_Keratinocytes	H3K9ac	145806	273378	0.533349	60672.8	1915.8	44.4373	2.40315	0	0	Null_Model_OpenChrom	human
Roadmapepigenomics_Dnase_narrow	Mobilized_CD34_Primary_Cells_Male	Dnase	221354	273378	0.809699	118336	2318.29	44.4372	1.87056	0	0	Null_Model_OpenChrom	human
Roadmapepigenomics_Histone_narrow	HeLa-S3_Cervical_Carcinoma	H3K4me3	137969	273378	0.504682	53850.1	1892.99	44.437	2.56209	0	0	Null_Model_OpenChrom	human
Roadmapepigenomics_Histone_narrow	Fetal_Placenta	H3K27ac	155718	273378	0.569607	65500.9	2030.26	44.4362	2.37734	0	0	Null_Model_OpenChrom	human
Roadmapepigenomics_Histone_narrow	Brain_Germinal_Matrix	H3K4me3	125746	273378	0.459971	45957.1	1795.62	44.4353	2.73616	0	0	Null_Model_OpenChrom	human
Roadmapepigenomics_ActiveChromatin	Spleen	ActiveChromatin	197317	273378	0.721774	98683.9	2219.7	44.4353	1.99949	0	0	Null_Model_OpenChrom	human
Roadmapepigenomics_Histone_narrow	Fetal_Brain_Female	H3K4me3	126338	273378	0.462137	47485.7	1774.56	44.4349	2.66055	0	0	Null_Model_OpenChrom	human
Enhancers_Hnisz2013	MM1S	Enhancer	74738	273378	0.273387	19999.9	1231.88	44.4347	3.73693	0	0	Null_Model_OpenChrom	human
Roadmapepigenomics_Histone_narrow	Brain_Mid_Frontal_Lobe	H3K4me3	145782	273378	0.533262	60539.8	1918.38	44.4344	2.40803	0	0	Null_Model_OpenChrom	human
Roadmapepigenomics_Histone_narrow	HUES64_Cell_Line	H3K9ac	143501	273378	0.524918	59139	1898.62	44.4332	2.4265	0	0	Null_Model_OpenChrom	human
Roadmapepigenomics_Histone_narrow	hESC_Derived_CD56+_Ectoderm_Cultured_Cells	H3K4me3	124610	273378	0.455816	46008.6	1769.02	44.4323	2.70841	0	0	Null_Model_OpenChrom	human
Roadmapepigenomics_Histone_narrow	HeLa-S3_Cervical_Carcinoma	H3K27ac	139902	273378	0.511753	55534.4	1898.8	44.4322	2.5192	0	0	Null_Model_OpenChrom	human
Enhancers_Hnisz2013	DND41	Enhancer	87168	273378	0.318855	25885.3	1379.24	44.4322	3.36747	0	0	Null_Model_OpenChrom	human
Roadmapepigenomics_Histone_narrow	H1_BMP4_Derived_Mesendoderm_Cultured_Cells	H3K9ac	137323	273378	0.502319	54413	1866	44.432	2.52372	0	0	Null_Model_OpenChrom	human
Roadmapepigenomics_ActiveChromatin	Bone_Marrow_Derived_Mesenchymal_Stem_Cell	2_TssAFlnk	115201	273378	0.421398	39861.7	1695.62	44.4318	2.89002	0	0	Null_Model_OpenChrom	human
Roadmapepigenomics_Histone_narrow	Brain_Angular_Gyrus	H3K4me3	139677	273378	0.51093	55337.6	1898.19	44.4316	2.52409	0	0	Null_Model_OpenChrom	human
DNaseI_Duke	GM12982	Dnase	211617	273378	0.774082	110479	2276.29	44.4312	1.91545	0	0	Null_Model_OpenChrom	human
Roadmapepigenomics_Histone_narrow	Mobilized_CD34_Primary_Cells_Female	H3K4me1	214082	273378	0.783099	109542	2352.9	44.4305	1.95434	0	0	Null_Model_OpenChrom	human
Roadmapepigenomics_Histone_narrow	iPS-18_Cell_Line	H3K9ac	136949	273378	0.500951	53193.4	1885.12	44.43	2.57455	0	0	Null_Model_OpenChrom	human
Roadmapepigenomics_Histone_narrow	Duodenum_Mucosa	H3K4me1	210792	273378	0.771064	110288	2262.08	44.4298	1.91128	0	0	Null_Model_OpenChrom	human
DNaseI_Duke	GM12891	Dnase	210989	273378	0.771785	109105	2293.14	44.4298	1.93381	0	0	Null_Model_OpenChrom	human
Enhancers_Hnisz2013	BI_CD8_Naive_8pool	Enhancer	67985	273378	0.248685	17554.5	1135.07	44.4295	3.87279	0	0	Null_Model_OpenChrom	human
Roadmapepigenomics_Histone_narrow	Penis_Foreskin_Keratinocyte_Primary_Cells_skin03	H3K4me3	138175	273378	0.505436	55316.5	1865.05	44.4268	2.4979	0	0	Null_Model_OpenChrom	human
Roadmapepigenomics_Histone_narrow	Esophagus	H3K27ac	173152	273378	0.633379	78993.1	2119.42	44.4268	2.19199	0	0	Null_Model_OpenChrom	human
Enhancers_Hnisz2013	BI_CD4p_CD25-_Il17p_PMAstim_Th17	Enhancer	90306	273378	0.330334	28436.2	1392.63	44.4266	3.17574	0	0	Null_Model_OpenChrom	human
Roadmapepigenomics_Histone_narrow	Psoas_Muscle	H3K27ac	157457	273378	0.575968	68543	2001.39	44.4262	2.2972	0	0	Null_Model_OpenChrom	human
Roadmapepigenomics_Histone_narrow	Brain_Anterior_Caudate	H3K4me3	153416	273378	0.561186	67139	1942.06	44.4255	2.28505	0	0	Null_Model_OpenChrom	human
Roadmapepigenomics_Histone_narrow	HepG2_Hepatocellular_Carcinoma	H3K4me2	156751	273378	0.573386	69698.5	1959.53	44.4253	2.24899	0	0	Null_Model_OpenChrom	human
Roadmapepigenomics_Histone_narrow	HeLa-S3_Cervical_Carcinoma	H2A.Z	137858	273378	0.504276	54285.9	1881.2	44.4249	2.53948	0	0	Null_Model_OpenChrom	human
Roadmapepigenomics_Histone_narrow	Rectal_Mucosa.Donor_31	H3K4me1	195086	273378	0.713613	99649	2148.31	44.4242	1.95773	0	0	Null_Model_OpenChrom	human
Roadmapepigenomics_Histone_narrow	Skeletal_Muscle_Female	H3K4me3	156193	273378	0.571344	67010.1	2007.61	44.4225	2.33089	0	0	Null_Model_OpenChrom	human
Roadmapepigenomics_Histone_narrow	K562_Leukemia	H3K4me1	166265	273378	0.608187	77087.2	2007.5	44.4223	2.15684	0	0	Null_Model_OpenChrom	human
Roadmapepigenomics_Histone_narrow	H1_Cell_Line	H4K5ac	134230	273378	0.491005	53036.3	1827.8	44.4216	2.53091	0	0	Null_Model_OpenChrom	human
Enhancers_Hnisz2013	BI_CD4p_CD225int_CD127p_Tmem	Enhancer	59773	273378	0.218646	14705.3	1014.55	44.4211	4.06472	0	0	Null_Model_OpenChrom	human
Roadmapepigenomics_Histone_narrow	Bone_Marrow_Derived_Mesenchymal_Stem_Cell_Cultured_Cells	H3K9ac	139784	273378	0.511321	57022.9	1863.14	44.4203	2.45137	0	0	Null_Model_OpenChrom	human
Roadmapepigenomics_ActiveChromatin	CD4+_CD25+_CD127-_Treg_Primary	3_TxFlnk	35583	273378	0.13016	5966.85	666.726	44.4203	5.96345	0	0	Null_Model_OpenChrom	human
Roadmapepigenomics_Histone_narrow	Colon_Smooth_Muscle	H3K4me3	144660	273378	0.529157	59512.4	1916.89	44.4196	2.43075	0	0	Null_Model_OpenChrom	human
Roadmapepigenomics_Histone_narrow	Brain_Mid_Frontal_Lobe	H3K9ac	153718	273378	0.562291	66830.2	1956.09	44.4191	2.30013	0	0	Null_Model_OpenChrom	human
Roadmapepigenomics_Histone_narrow	Brain_Cingulate_Gyrus	H3K4me3	145242	273378	0.531286	61238.1	1891.28	44.4164	2.37176	0	0	Null_Model_OpenChrom	human
Roadmapepigenomics_Histone_narrow	ES-I3_Cell_Line	H3K9ac	137360	273378	0.502454	57343.8	1801.54	44.4154	2.39538	0	0	Null_Model_OpenChrom	human
Roadmapepigenomics_Histone_narrow	NHLF_Lung_Fibroblasts	H3K79me2	113724	273378	0.415995	42389	1606.11	44.4147	2.68287	0	0	Null_Model_OpenChrom	human
Roadmapepigenomics_Histone_narrow	HUVEC_Umbilical_Vein_Endothelial_Cells	H3K27ac	136890	273378	0.500735	54984.9	1844.12	44.4142	2.48959	0	0	Null_Model_OpenChrom	human
Roadmapepigenomics_Histone_narrow	Brain_Substantia_Nigra	H3K27ac	174908	273378	0.639803	82002.2	2091.81	44.4141	2.13297	0	0	Null_Model_OpenChrom	human
Roadmapepigenomics_Histone_narrow	Sigmoid_Colon	H3K4me1	158189	273378	0.578646	69852.7	1988.94	44.4137	2.26461	0	0	Null_Model_OpenChrom	human
Enhancers_Hnisz2013	BI_CD34_Primary_RO01536	Enhancer	102290	273378	0.374171	34548.6	1525.27	44.4128	2.96076	0	0	Null_Model_OpenChrom	human
Roadmapepigenomics_Dnase_narrow	Monocytes-CD14+_RO01746	Dnase	214385	273378	0.784207	115603	2224.19	44.4125	1.85449	0	0	Null_Model_OpenChrom	human
Roadmapepigenomics_ActiveChromatin	Adipose_Derived_Mesenchymal_Stem_Cell	2_TssAFlnk	115598	273378	0.42285	42527.2	1645.3	44.4119	2.71821	0	0	Null_Model_OpenChrom	human
Roadmapepigenomics_Histone_narrow	Brain_Hippocampus_Middle	H3K4me3	151996	273378	0.555992	65749	1941.99	44.4118	2.31176	0	0	Null_Model_OpenChrom	human
Roadmapepigenomics_Histone_narrow	iPS-15b_Cell_Line	H3K4me3	135387	273378	0.495237	56635.5	1773.22	44.4115	2.3905	0	0	Null_Model_OpenChrom	human
Roadmapepigenomics_ActiveChromatin	CD34	7_Enh	152700	273378	0.558567	68858.1	1887.91	44.41	2.21761	0	0	Null_Model_OpenChrom	human
Roadmapepigenomics_Histone_narrow	Brain_Inferior_Temporal_Lobe	H3K4me3	145446	273378	0.532033	62349.7	1871.13	44.4098	2.33275	0	0	Null_Model_OpenChrom	human
Roadmapepigenomics_Histone_narrow	Fetal_Heart	H3K4me3	133505	273378	0.488353	54553.6	1777.82	44.4091	2.44723	0	0	Null_Model_OpenChrom	human
Roadmapepigenomics_Histone_narrow	Neurosphere_Cultured_Cells_Ganglionic_Eminence_Derived	H3K4me3	135803	273378	0.496759	55608.6	1805.82	44.4088	2.44212	0	0	Null_Model_OpenChrom	human
Roadmapepigenomics_Histone_narrow	CD4+_CD25-_IL17+_PMA-Ionomcyin_stimulated_Th17_Primary_Cells	H3K36me3	133225	273378	0.487329	55006.8	1761.34	44.4084	2.42197	0	0	Null_Model_OpenChrom	human
Roadmapepigenomics_Histone_narrow	Skeletal_Muscle_Female	H3K27ac	167278	273378	0.611893	77088.2	2030.93	44.408	2.16996	0	0	Null_Model_OpenChrom	human
Roadmapepigenomics_Histone_narrow	Colon_Smooth_Muscle	H3K27ac	159087	273378	0.581931	73720.3	1922.35	44.4074	2.15798	0	0	Null_Model_OpenChrom	human
Roadmapepigenomics_Histone_narrow	Skeletal_Muscle_Female	H3K9ac	167613	273378	0.613118	77590.7	2027.2	44.4072	2.16022	0	0	Null_Model_OpenChrom	human
Roadmapepigenomics_Histone_narrow	Breast_Myoepithelial_Cells	H3K4me3	135329	273378	0.495025	54748	1814.61	44.4069	2.47185	0	0	Null_Model_OpenChrom	human
Roadmapepigenomics_Histone_narrow	HUVEC_Umbilical_Vein_Endothelial_Cells	H3K79me2	114640	273378	0.419346	43363.1	1605.14	44.4055	2.64372	0	0	Null_Model_OpenChrom	human
Roadmapepigenomics_Histone_narrow	Rectal_Smooth_Muscle	H3K27ac	151448	273378	0.553988	67125.6	1898.94	44.405	2.25619	0	0	Null_Model_OpenChrom	human
Roadmapepigenomics_Histone_narrow	HUES64_Cell_Line	H3K4me3	129913	273378	0.475214	51835.9	1758.35	44.4036	2.50624	0	0	Null_Model_OpenChrom	human
Enhancers_Hnisz2013	BI_CD4_Memory_Primary_8pool	Enhancer	56472	273378	0.206571	13804.2	960.918	44.4032	4.09093	0	0	Null_Model_OpenChrom	human
Roadmapepigenomics_Histone_narrow	A549_EtOH_0.02pct_Lung_Carcinoma	H3K9ac	143662	273378	0.525507	61111.5	1859.13	44.4028	2.35082	0	0	Null_Model_OpenChrom	human
Roadmapepigenomics_Histone_narrow	Fetal_Lung	H3K9ac	154659	273378	0.565733	69550.4	1916.82	44.4009	2.2237	0	0	Null_Model_OpenChrom	human
Roadmapepigenomics_Dnase_narrow	Mobilized_CD34_Primary_Cells_Female	Dnase	222723	273378	0.814707	124358	2215.38	44.4008	1.79098	0	0	Null_Model_OpenChrom	human
Roadmapepigenomics_Histone_narrow	HUES48_Cell_Line	H3K4me3	132533	273378	0.484798	55637.4	1731.86	44.4005	2.38208	0	0	Null_Model_OpenChrom	human
Enhancers_Hnisz2013	Fetal_Thymus	Enhancer	96076	273378	0.35144	32358.1	1435.09	44.4	2.96915	0	0	Null_Model_OpenChrom	human
Roadmapepigenomics_Histone_narrow	Fetal_Intestine_Small	H3K27ac	163450	273378	0.59789	75968.5	1970.32	44.3998	2.15155	0	0	Null_Model_OpenChrom	human
Roadmapepigenomics_Histone_narrow	NHDF-Ad_Adult_Dermal_Fibroblasts	H3K79me2	109284	273378	0.399754	40899.1	1540.26	44.3984	2.67204	0	0	Null_Model_OpenChrom	human
Roadmapepigenomics_Histone_narrow	4star	H3K4me3	128019	273378	0.468286	50727.6	1740.88	44.3979	2.52366	0	0	Null_Model_OpenChrom	human
Roadmapepigenomics_Histone_narrow	HUES6_Cell_Line	H3K27ac	130198	273378	0.476256	53347.6	1730.96	44.3976	2.44056	0	0	Null_Model_OpenChrom	human
Roadmapepigenomics_Histone_narrow	Right_Atrium	H3K27ac	157403	273378	0.575771	71860.5	1926.74	44.3975	2.1904	0	0	Null_Model_OpenChrom	human
Roadmapepigenomics_Histone_narrow	Fetal_Intestine_Large	H3K27ac	159154	273378	0.582176	72771.9	1945.66	44.3974	2.18702	0	0	Null_Model_OpenChrom	human
Enhancers_Hnisz2013	BI_CD4_Naive_Primary_8pool	Enhancer	59622	273378	0.218094	15210.3	1000.32	44.3974	3.91984	0	0	Null_Model_OpenChrom	human
DNaseI_Duke	Adult_CD4_Th1	Dnase	189539	273378	0.693322	96581.6	2093.84	44.3957	1.96248	0	0	Null_Model_OpenChrom	human
Roadmapepigenomics_Histone_narrow	HSMMtube_Skeletal_Muscle_Myotubes_Derived_from_HSMM	H3K4me3	139824	273378	0.511468	58437.9	1833.22	44.3951	2.39269	0	0	Null_Model_OpenChrom	human
Roadmapepigenomics_Dnase_narrow	Fetal_Thymus	Dnase	227990	273378	0.833973	133625	2125.58	44.3949	1.70619	0	0	Null_Model_OpenChrom	human
Roadmapepigenomics_Histone_narrow	Brain_Angular_Gyrus	H3K9ac	163000	273378	0.596244	77985.5	1914.98	44.3944	2.09013	0	0	Null_Model_OpenChrom	human
Roadmapepigenomics_Histone_narrow	A549_EtOH_0.02pct_Lung_Carcinoma	H3K27ac	139166	273378	0.509061	58130.3	1825.36	44.3944	2.39404	0	0	Null_Model_OpenChrom	human
Roadmapepigenomics_Histone_narrow	iPS-20b_Cell_Line	H3K9ac	151698	273378	0.554902	68566	1872.59	44.394	2.21244	0	0	Null_Model_OpenChrom	human
Roadmapepigenomics_Histone_narrow	iPS-18_Cell_Line	H3K4me3	131857	273378	0.482325	54686.4	1738.32	44.3937	2.41115	0	0	Null_Model_OpenChrom	human
Roadmapepigenomics_Histone_narrow	Left_Ventricle	H3K27ac	159515	273378	0.583496	74318.6	1919.18	44.3921	2.14637	0	0	Null_Model_OpenChrom	human
Roadmapepigenomics_Histone_narrow	NHEK-Epidermal_Keratinocytes	H3K4me3	145602	273378	0.532603	64988.7	1816.02	44.39	2.24042	0	0	Null_Model_OpenChrom	human
Roadmapepigenomics_Histone_narrow	Fetal_Muscle_Leg	H3K27ac	166082	273378	0.607518	79989.7	1939.45	44.39	2.07629	0	0	Null_Model_OpenChrom	human
Enhancers_Hnisz2013	CD3	Enhancer	66357	273378	0.24273	17813.1	1093.59	44.3896	3.72518	0	0	Null_Model_OpenChrom	human
Roadmapepigenomics_Histone_narrow	Penis_Foreskin_Melanocyte_Primary_Cells_skin01	H3K27ac	149527	273378	0.546961	67041.7	1858.26	44.3886	2.23036	0	0	Null_Model_OpenChrom	human
Roadmapepigenomics_Histone_narrow	Stomach_Smooth_Muscle	H3K4me3	155873	273378	0.570174	72158.3	1885.97	44.3881	2.16015	0	0	Null_Model_OpenChrom	human
Roadmapepigenomics_Histone_narrow	Brain_Cingulate_Gyrus	H3K9ac	163860	273378	0.59939	77059.9	1955.51	44.3873	2.1264	0	0	Null_Model_OpenChrom	human
Roadmapepigenomics_Histone_narrow	H1_Cell_Line	H3K27ac	148154	273378	0.541938	66677.8	1835.65	44.3854	2.22194	0	0	Null_Model_OpenChrom	human
Roadmapepigenomics_Histone_narrow	H1_Cell_Line	H3K56ac	105098	273378	0.384442	38643	1497.24	44.385	2.71972	0	0	Null_Model_OpenChrom	human
DNaseClusters	HMVEC-dLy-Ad	Dnase	163905	273378	0.599554	77799.5	1939.99	44.3845	2.10676	0	0	Null_Model_OpenChrom	human
Roadmapepigenomics_Histone_narrow	Fetal_Brain_Male	H3K9me3	47715	273378	0.174539	10555.7	837.218	44.3842	4.52029	0	0	Null_Model_OpenChrom	human
Roadmapepigenomics_Histone_narrow	NHEK-Epidermal_Keratinocytes	H3K79me2	121842	273378	0.445691	48613.8	1649.88	44.3841	2.50633	0	0	Null_Model_OpenChrom	human
Roadmapepigenomics_ActiveChromatin	Pancreatic_Islets	ActiveChromatin	143325	273378	0.524274	62504.5	1820.93	44.3841	2.29303	0	0	Null_Model_OpenChrom	human
Roadmapepigenomics_Histone_narrow	NHEK-Epidermal_Keratinocytes	H3K27ac	143408	273378	0.524578	63092.3	1809.57	44.384	2.27299	0	0	Null_Model_OpenChrom	human
Roadmapepigenomics_Histone_narrow	HeLa-S3_Cervical_Carcinoma	H3K4me2	141947	273378	0.519233	61300.7	1817.02	44.3838	2.31558	0	0	Null_Model_OpenChrom	human
Roadmapepigenomics_Histone_narrow	Colonic_Mucosa	H3K4me1	193449	273378	0.707625	101397	2074.02	44.3835	1.90784	0	0	Null_Model_OpenChrom	human
Roadmapepigenomics_Histone_narrow	NHDF-Ad_Adult_Dermal_Fibroblasts	H3K27ac	128459	273378	0.469895	52072.5	1721.06	44.3833	2.46693	0	0	Null_Model_OpenChrom	human
Roadmapepigenomics_Histone_narrow	NHLF_Lung_Fibroblasts	H3K27ac	139104	273378	0.508834	59229.3	1799.68	44.3827	2.34857	0	0	Null_Model_OpenChrom	human
Roadmapepigenomics_Histone_narrow	Chondrocytes_from_Bone_Marrow_Derived_Mesenchymal_Stem_Cell_Cultured_Cells	H3K9ac	153502	273378	0.561501	69719	1887.75	44.3826	2.20172	0	0	Null_Model_OpenChrom	human
SuperEnhancers_Hnisz2013	CD19_primary	SuperEnhancer	31808	273378	0.116352	5574.16	591.091	44.3821	5.70633	0	0	Null_Model_OpenChrom	human
Roadmapepigenomics_Histone_narrow	Gastric	H3K4me3	138161	273378	0.505384	59137.2	1780.57	44.3812	2.33628	0	0	Null_Model_OpenChrom	human
Enhancers_Hnisz2013	BI_CD8_Naive_7pool	Enhancer	52687	273378	0.192726	12570.8	903.901	44.3812	4.19121	0	0	Null_Model_OpenChrom	human
Roadmapepigenomics_Histone_narrow	HUES64_Cell_Line	H3K27ac	135204	273378	0.494568	57786.2	1744.41	44.3805	2.33973	0	0	Null_Model_OpenChrom	human
DNaseClusters	PANC-1	Dnase	153854	273378	0.562789	70156.4	1885.91	44.3805	2.19301	0	0	Null_Model_OpenChrom	human
Roadmapepigenomics_Histone_narrow	iPS-20b_Cell_Line	H3K27ac	133299	273378	0.4876	54922.5	1766.05	44.3796	2.42704	0	0	Null_Model_OpenChrom	human
Enhancers_Hnisz2013	UCSD_Thymus	Enhancer	70341	273378	0.257303	20037	1133.5	44.3793	3.51055	0	0	Null_Model_OpenChrom	human
Roadmapepigenomics_Histone_narrow	H1_BMP4_Derived_Mesendoderm_Cultured_Cells	H4K8ac	136367	273378	0.498822	58745.3	1749.06	44.379	2.32132	0	0	Null_Model_OpenChrom	human
Roadmapepigenomics_Histone_narrow	H1_BMP4_Derived_Mesendoderm_Cultured_Cells	H3K79me2	100899	273378	0.369082	37349.6	1431.98	44.3786	2.70147	0	0	Null_Model_OpenChrom	human
Roadmapepigenomics_Histone_narrow	IMR90_Cell_Line	H3K56ac	126312	273378	0.462042	51542.5	1684.84	44.3779	2.45064	0	0	Null_Model_OpenChrom	human
Roadmapepigenomics_Histone_narrow	H1_Derived_Neuronal_Progenitor_Cultured_Cells	H3K27ac	110691	273378	0.404901	42826.4	1529.27	44.3773	2.58465	0	0	Null_Model_OpenChrom	human
Roadmapepigenomics_Histone_narrow	HMEC_Mammary_Epithelial	H3K79me2	123023	273378	0.450011	49408.8	1658.83	44.3771	2.4899	0	0	Null_Model_OpenChrom	human
Roadmapepigenomics_Histone_narrow	Stomach_Smooth_Muscle	H3K27ac	152278	273378	0.557024	69113.4	1874.05	44.377	2.2033	0	0	Null_Model_OpenChrom	human
DNaseClusters	SK-N-SH_RA	Dnase	141502	273378	0.517606	62077.9	1789.83	44.3753	2.27943	0	0	Null_Model_OpenChrom	human
Roadmapepigenomics_Histone_narrow	Lung	H3K27ac	189965	273378	0.69488	97066.1	2093.49	44.3752	1.95707	0	0	Null_Model_OpenChrom	human
Roadmapepigenomics_Histone_narrow	HSMM_Skeletal_Muscle_Myoblasts	H3K79me2	104112	273378	0.380835	38138.1	1486.73	44.3751	2.72987	0	0	Null_Model_OpenChrom	human
DNaseClusters	HMVEC-dAd	Dnase	163052	273378	0.596434	77612.4	1925.41	44.3749	2.10085	0	0	Null_Model_OpenChrom	human
Roadmapepigenomics_Histone_narrow	HUVEC_Umbilical_Vein_Endothelial_Cells	H2A.Z	147904	273378	0.541024	66966.8	1824.01	44.3733	2.20862	0	0	Null_Model_OpenChrom	human
Roadmapepigenomics_Histone_narrow	Adipose_Nuclei	H3K27ac	160982	273378	0.588862	77048.4	1891.59	44.3721	2.08936	0	0	Null_Model_OpenChrom	human
Roadmapepigenomics_Histone_narrow	HUES6_Cell_Line	H3K4me3	134674	273378	0.492629	57714.1	1734.47	44.3709	2.33347	0	0	Null_Model_OpenChrom	human
Roadmapepigenomics_Histone_narrow	Osteoblasts	H3K4me3	148367	273378	0.542717	67041.4	1832.87	44.3706	2.21307	0	0	Null_Model_OpenChrom	human
Roadmapepigenomics_Histone_narrow	Skeletal_Muscle_Male	H3K9ac	175889	273378	0.643391	87951.3	1981.91	44.3701	1.99984	0	0	Null_Model_OpenChrom	human
Roadmapepigenomics_Histone_narrow	H9_Cell_Line	H3K9ac	152316	273378	0.557163	69905	1857.45	44.3679	2.1789	0	0	Null_Model_OpenChrom	human
Roadmapepigenomics_Histone_narrow	H1_BMP4_Derived_Mesendoderm_Cultured_Cells	H3K27ac	140083	273378	0.512415	63305.4	1730.57	44.3656	2.21281	0	0	Null_Model_OpenChrom	human
Roadmapepigenomics_Histone_narrow	Fetal_Muscle_Trunk	H3K27ac	147278	273378	0.538734	67338.6	1801.86	44.365	2.18713	0	0	Null_Model_OpenChrom	human
Roadmapepigenomics_Histone_narrow	A549_EtOH_0.02pct_Lung_Carcinoma	H3K4me3	140130	273378	0.512587	63553.1	1726.07	44.3649	2.20493	0	0	Null_Model_OpenChrom	human
Roadmapepigenomics_Histone_narrow	IMR90_Cell_Line	H3K9ac	155958	273378	0.570485	73103.7	1867.57	44.3647	2.13338	0	0	Null_Model_OpenChrom	human
Roadmapepigenomics_Histone_narrow	HSMMtube_Skeletal_Muscle_Myotubes_Derived_from_HSMM	H3K9ac	148495	273378	0.543186	69816.5	1773.45	44.3647	2.12693	0	0	Null_Model_OpenChrom	human
Roadmapepigenomics_Histone_narrow	A549_EtOH_0.02pct_Lung_Carcinoma	H3K79me2	124537	273378	0.455549	51372.5	1649.19	44.364	2.4242	0	0	Null_Model_OpenChrom	human
Roadmapepigenomics_Histone_narrow	A549_EtOH_0.02pct_Lung_Carcinoma	H2A.Z	138324	273378	0.505981	61040.4	1742.04	44.3639	2.26611	0	0	Null_Model_OpenChrom	human
Roadmapepigenomics_ActiveChromatin	A549_EtOH_0.02pct_Lung_Carcinoma	2_TssAFlnk	102903	273378	0.376413	38778.7	1445.42	44.3637	2.65359	0	0	Null_Model_OpenChrom	human
Roadmapepigenomics_Histone_narrow	iPS_DF_19.11_Cell_Line	H3K27ac	155004	273378	0.566995	73892.5	1828.34	44.3635	2.0977	0	0	Null_Model_OpenChrom	human
Roadmapepigenomics_Dnase_narrow	Fetal_Intestine_Small	Dnase	172534	273378	0.631119	88030.7	1904.83	44.3627	1.95993	0	0	Null_Model_OpenChrom	human
Roadmapepigenomics_Histone_narrow	NH-A_Astrocytes	H3K4me3	138378	273378	0.506178	60733.4	1750.22	44.3626	2.27845	0	0	Null_Model_OpenChrom	human
Roadmapepigenomics_Histone_narrow	Brain_Hippocampus_Middle	H3K27ac	180476	273378	0.66017	92755.6	1977.44	44.3605	1.94572	0	0	Null_Model_OpenChrom	human
Roadmapepigenomics_Histone_narrow	Bone_Marrow_Derived_Mesenchymal_Stem_Cell_Cultured_Cells	H3K4me3	143466	273378	0.52479	63835.1	1795.09	44.3605	2.24745	0	0	Null_Model_OpenChrom	human
Roadmapepigenomics_ActiveChromatin	CD34	3_TxFlnk	30814	273378	0.112716	5293.04	575.309	44.3605	5.82161	0	0	Null_Model_OpenChrom	human
Roadmapepigenomics_Histone_narrow	H9_Cell_Line	H3K4me2	140832	273378	0.515155	62130.5	1774.16	44.3599	2.26671	0	0	Null_Model_OpenChrom	human
DNaseClusters	HPAEC	Dnase	157083	273378	0.5746	75999.5	1827.85	44.3599	2.0669	0	0	Null_Model_OpenChrom	human
Roadmapepigenomics_Histone_narrow	HSMM_Skeletal_Muscle_Myoblasts	H2A.Z	146268	273378	0.535039	67206.2	1782.31	44.3591	2.17641	0	0	Null_Model_OpenChrom	human
Roadmapepigenomics_Histone_narrow	Aorta	H3K27ac	133473	273378	0.488236	58080.6	1699.6	44.359	2.29807	0	0	Null_Model_OpenChrom	human
Roadmapepigenomics_Histone_narrow	Muscle_Satellite_Cultured_Cells	H3K4me3	141455	273378	0.517434	61808.7	1795.56	44.3574	2.28859	0	0	Null_Model_OpenChrom	human
Roadmapepigenomics_ActiveChromatin	Rectal_Smooth_Muscle	ActiveChromatin	168923	273378	0.61791	83552.4	1924.62	44.3572	2.02176	0	0	Null_Model_OpenChrom	human
Roadmapepigenomics_Histone_narrow	Small_Intestine	H3K4me1	175790	273378	0.643029	90647.5	1919.48	44.3571	1.93927	0	0	Null_Model_OpenChrom	human
Roadmapepigenomics_Histone_narrow	HUVEC_Umbilical_Vein_Endothelial_Cells	H3K4me2	150042	273378	0.548844	70458.8	1794.15	44.357	2.1295	0	0	Null_Model_OpenChrom	human
Roadmapepigenomics_Histone_narrow	HMEC_Mammary_Epithelial	H3K27ac	136829	273378	0.500512	59279.5	1748.32	44.3566	2.3082	0	0	Null_Model_OpenChrom	human
DNaseI_Duke	K562+G2-M_phase	Dnase	164356	273378	0.601204	82466	1846.19	44.3562	1.99302	0	0	Null_Model_OpenChrom	human
DNaseClusters	HMVEC-LLy	Dnase	168934	273378	0.61795	86164.3	1866.03	44.356	1.9606	0	0	Null_Model_OpenChrom	human
Roadmapepigenomics_Histone_narrow	H1_BMP4_Derived_Trophoblast_Cultured_Cells	H3K4me3	135075	273378	0.494096	60939.8	1671.37	44.3559	2.21653	0	0	Null_Model_OpenChrom	human
Roadmapepigenomics_ActiveChromatin	Duodenum_Smooth_Muscle	ActiveChromatin	175396	273378	0.641588	88401.6	1961.3	44.3555	1.98408	0	0	Null_Model_OpenChrom	human
Enhancers_Hnisz2013	BI_CD4_Naive_Primary_7pool	Enhancer	53251	273378	0.194789	13451.3	897.291	44.3554	3.9588	0	0	Null_Model_OpenChrom	human
DNaseClusters	HMVEC-dNeo	Dnase	169191	273378	0.61889	86165.5	1871.85	44.3549	1.96356	0	0	Null_Model_OpenChrom	human
Roadmapepigenomics_Dnase_narrow	Small_Intestine	Dnase	206610	273378	0.755767	119408	1966.02	44.3548	1.73029	0	0	Null_Model_OpenChrom	human
Roadmapepigenomics_Dnase_narrow	K562_Leukemia	Dnase	198418	273378	0.725801	111185	1966.72	44.3546	1.78457	0	0	Null_Model_OpenChrom	human
Roadmapepigenomics_Histone_narrow	ES-I3_Cell_Line	H3K4me3	136705	273378	0.500059	59341.8	1744.22	44.3541	2.30369	0	0	Null_Model_OpenChrom	human
Roadmapepigenomics_Histone_narrow	Brain_Anterior_Caudate	H3K27ac	182956	273378	0.669242	96949.2	1939.1	44.3539	1.88713	0	0	Null_Model_OpenChrom	human
Roadmapepigenomics_ActiveChromatin	Adult_Liver	ActiveChromatin	175971	273378	0.643691	90136.8	1935.27	44.3526	1.95227	0	0	Null_Model_OpenChrom	human
DNaseClusters	HCT-116	Dnase	152101	273378	0.556376	70286.6	1844.64	44.3525	2.16401	0	0	Null_Model_OpenChrom	human
DNaseI_Duke	K562+SAHA_1uM_72hr	Dnase	172821	273378	0.632169	87738.1	1918.36	44.3518	1.96974	0	0	Null_Model_OpenChrom	human
Roadmapepigenomics_Histone_narrow	Brain_Anterior_Caudate	H3K9ac	173135	273378	0.633317	88109.9	1917.06	44.3517	1.96499	0	0	Null_Model_OpenChrom	human
Roadmapepigenomics_Histone_narrow	H9_Derived_Neuron_Cultured_Cells	H2A.Z	129556	273378	0.473908	57577	1623.04	44.3483	2.25014	0	0	Null_Model_OpenChrom	human
Roadmapepigenomics_ActiveChromatin	Stomach_Mucosa	ActiveChromatin	179280	273378	0.655795	95262	1894.54	44.3474	1.88197	0	0	Null_Model_OpenChrom	human
Roadmapepigenomics_Histone_narrow	HSMMtube_Skeletal_Muscle_Myotubes_Derived_from_HSMM	H3K79me2	121306	273378	0.44373	50275.2	1601.7	44.3471	2.41284	0	0	Null_Model_OpenChrom	human
Roadmapepigenomics_Histone_narrow	Chondrocytes_from_Bone_Marrow_Derived_Mesenchymal_Stem_Cell_Cultured_Cells	H3K4me3	145001	273378	0.530405	65691.6	1788.39	44.3469	2.2073	0	0	Null_Model_OpenChrom	human
SuperEnhancers_Hnisz2013	CD20	SuperEnhancer	47722	273378	0.174564	11409.4	818.848	44.3459	4.18269	0	0	Null_Model_OpenChrom	human
Roadmapepigenomics_ActiveChromatin	Aorta	ActiveChromatin	139740	273378	0.51116	62952.8	1731.58	44.3451	2.21976	0	0	Null_Model_OpenChrom	human
Roadmapepigenomics_ActiveChromatin	Lung	ActiveChromatin	176088	273378	0.644119	91538.1	1906.65	44.3447	1.92366	0	0	Null_Model_OpenChrom	human
Roadmapepigenomics_Histone_narrow	Osteoblasts	H3K79me2	126944	273378	0.464353	53816.1	1649.11	44.3439	2.35885	0	0	Null_Model_OpenChrom	human
DNaseI_Duke	K562	Dnase	171419	273378	0.62704	88139	1878.05	44.3437	1.94487	0	0	Null_Model_OpenChrom	human
Roadmapepigenomics_Histone_narrow	Placenta_Amnion	H3K27ac	120690	273378	0.441477	52107.6	1546.65	44.3425	2.31617	0	0	Null_Model_OpenChrom	human
Roadmapepigenomics_Histone_narrow	iPS_DF_19.11_Cell_Line	H3K4me3	137176	273378	0.501781	61378	1709.38	44.3424	2.23494	0	0	Null_Model_OpenChrom	human
Roadmapepigenomics_Histone_narrow	IMR90_Cell_Line	H2AK9ac	129057	273378	0.472083	55556.9	1657.56	44.3422	2.32297	0	0	Null_Model_OpenChrom	human
Roadmapepigenomics_Histone_narrow	NH-A_Astrocytes	H2A.Z	146107	273378	0.53445	68568.8	1748.64	44.3421	2.13081	0	0	Null_Model_OpenChrom	human
Roadmapepigenomics_Histone_narrow	H1_BMP4_Derived_Trophoblast_Cultured_Cells	H3K4ac	155119	273378	0.567416	75652.1	1792.19	44.3406	2.05043	0	0	Null_Model_OpenChrom	human
Roadmapepigenomics_ActiveChromatin	Esophagus	ActiveChromatin	172053	273378	0.629359	89147	1869.76	44.3403	1.92999	0	0	Null_Model_OpenChrom	human
Roadmapepigenomics_Histone_narrow	HSMM_Skeletal_Muscle_Myoblasts	H3K27ac	132654	273378	0.48524	58847.4	1664.55	44.3402	2.2542	0	0	Null_Model_OpenChrom	human
Roadmapepigenomics_Histone_narrow	Penis_Foreskin_Melanocyte_Primary_Cells_skin03	H3K27ac	174194	273378	0.637191	91413.9	1866.98	44.339	1.90555	0	0	Null_Model_OpenChrom	human
BroadChromHMM	K562	WeakPromoter	76408	273378	0.279496	24177.6	1178	44.3381	3.16028	0	0	Null_Model_OpenChrom	human
Roadmapepigenomics_Histone_narrow	HUES6_Cell_Line	H3K9ac	153896	273378	0.562942	73559.5	1811.92	44.3377	2.09213	0	0	Null_Model_OpenChrom	human
Roadmapepigenomics_Histone_narrow	iPS-20b_Cell_Line	H3K4me3	138514	273378	0.506676	62636.6	1711.36	44.3376	2.21139	0	0	Null_Model_OpenChrom	human
Roadmapepigenomics_Histone_narrow	CD4+_CD25-_CD45RA+_Naive_Primary_Cellsd_	H3K36me3	124414	273378	0.455099	53863.4	1591.24	44.3368	2.3098	0	0	Null_Model_OpenChrom	human
DNaseClusters	Ishikawa+4OHTAM_100nM_30m	Dnase	166017	273378	0.60728	85936.5	1806.19	44.3366	1.93186	0	0	Null_Model_OpenChrom	human
Roadmapepigenomics_Histone_narrow	IMR90_Cell_Line	H3K79me2	131934	273378	0.482607	58701	1651.78	44.3358	2.24756	0	0	Null_Model_OpenChrom	human
Roadmapepigenomics_Histone_narrow	Fetal_Heart	H3K9ac	160259	273378	0.586218	79086.6	1830.9	44.3348	2.02637	0	0	Null_Model_OpenChrom	human
Roadmapepigenomics_Histone_narrow	Muscle_Satellite_Cultured_Cells	H3K9ac	147706	273378	0.5403	69226	1770.2	44.3339	2.13368	0	0	Null_Model_OpenChrom	human
Roadmapepigenomics_Histone_narrow	H1_Cell_Line	H3K23me2	116639	273378	0.426658	47874.8	1551.06	44.3338	2.43634	0	0	Null_Model_OpenChrom	human
Roadmapepigenomics_Histone_narrow	Fetal_Adrenal_Gland	H3K27ac	162869	273378	0.595765	82548.1	1811.73	44.3338	1.97302	0	0	Null_Model_OpenChrom	human
Roadmapepigenomics_Histone_narrow	NH-A_Astrocytes	H3K79me2	122136	273378	0.446766	50586.9	1613.99	44.3306	2.41438	0	0	Null_Model_OpenChrom	human
DNaseClusters	HeLa-S3+IFNa4h	Dnase	151702	273378	0.554917	73759.3	1758.21	44.3306	2.05672	0	0	Null_Model_OpenChrom	human
Roadmapepigenomics_Histone_narrow	Brain_Inferior_Temporal_Lobe	H3K27ac	172360	273378	0.630482	91037.2	1834.53	44.3289	1.89329	0	0	Null_Model_OpenChrom	human
Roadmapepigenomics_Histone_narrow	Brain_Cingulate_Gyrus	H3K27ac	170178	273378	0.622501	86143.7	1895.71	44.3288	1.97551	0	0	Null_Model_OpenChrom	human
Roadmapepigenomics_Histone_narrow	Fetal_Stomach	H3K27ac	171223	273378	0.626323	88585.3	1864.28	44.3268	1.93286	0	0	Null_Model_OpenChrom	human
DNaseClusters	HMVEC-dLy-Neo	Dnase	172294	273378	0.630241	90488.7	1845.55	44.3257	1.90404	0	0	Null_Model_OpenChrom	human
DNaseI_Duke	K562+G1_phase	Dnase	167345	273378	0.612138	84439.9	1870.37	44.3255	1.98182	0	0	Null_Model_OpenChrom	human
DNaseClusters	SK-N-MC	Dnase	146904	273378	0.537366	71782.3	1694.91	44.3218	2.04652	0	0	Null_Model_OpenChrom	human
Roadmapepigenomics_Histone_narrow	Brain_Angular_Gyrus	H3K27ac	165668	273378	0.606003	84327.8	1835.24	44.3213	1.96457	0	0	Null_Model_OpenChrom	human
DNaseI_Duke	K562+SAHA_ctrl	Dnase	175560	273378	0.642188	92982.9	1863.15	44.3213	1.88809	0	0	Null_Model_OpenChrom	human
Roadmapepigenomics_Histone_narrow	H1_Derived_Neuronal_Progenitor_Cultured_Cells	H3K4me3	132635	273378	0.485171	59157.6	1657.9	44.3197	2.24206	0	0	Null_Model_OpenChrom	human
Roadmapepigenomics_Histone_narrow	Brain_Inferior_Temporal_Lobe	H3K9ac	170737	273378	0.624546	86784.8	1894.26	44.3192	1.96736	0	0	Null_Model_OpenChrom	human
DNaseClusters	Ishikawa+Estradiol_100nM_1hr	Dnase	164720	273378	0.602536	84073.8	1819.69	44.3186	1.95923	0	0	Null_Model_OpenChrom	human
Roadmapepigenomics_Histone_narrow	H1_BMP4_Derived_Trophoblast_Cultured_Cells	H3K27ac	130832	273378	0.478575	59419.2	1611.39	44.3174	2.20185	0	0	Null_Model_OpenChrom	human
Roadmapepigenomics_Histone_narrow	H1_BMP4_Derived_Mesendoderm_Cultured_Cells	H3K18ac	146995	273378	0.537699	70664.1	1722.38	44.3172	2.08019	0	0	Null_Model_OpenChrom	human
Roadmapepigenomics_Histone_narrow	iPS-15b_Cell_Line	H3K9ac	166279	273378	0.608238	85355.5	1826.01	44.3171	1.94808	0	0	Null_Model_OpenChrom	human
Roadmapepigenomics_Histone_narrow	HSMM_Skeletal_Muscle_Myoblasts	H3K4me2	153849	273378	0.56277	76090.6	1754.59	44.3171	2.02192	0	0	Null_Model_OpenChrom	human
Roadmapepigenomics_Histone_narrow	H1_BMP4_Derived_Trophoblast_Cultured_Cells	H3K79me2	151004	273378	0.552363	73502.2	1748.83	44.3164	2.05441	0	0	Null_Model_OpenChrom	human
Roadmapepigenomics_Histone_narrow	NH-A_Astrocytes	H3K9ac	148885	273378	0.544612	71367.4	1749.2	44.316	2.08618	0	0	Null_Model_OpenChrom	human
Roadmapepigenomics_Histone_narrow	IMR90_Cell_Line	H3K23ac	138868	273378	0.507971	65131.1	1663.91	44.3154	2.13213	0	0	Null_Model_OpenChrom	human
Roadmapepigenomics_Histone_narrow	Adult_Liver	H3K4me1	185119	273378	0.677154	101165	1894.47	44.3154	1.82988	0	0	Null_Model_OpenChrom	human
Roadmapepigenomics_ActiveChromatin	Psoas_Muscle	ActiveChromatin	163621	273378	0.598516	82761.8	1824.63	44.3153	1.97701	0	0	Null_Model_OpenChrom	human
Roadmapepigenomics_ActiveChromatin	Brain_Angular_Gyrus	ActiveChromatin	165492	273378	0.60536	87526.9	1759.38	44.3139	1.89076	0	0	Null_Model_OpenChrom	human
DNaseClusters	Adult_CD4_Th0	Dnase	205040	273378	0.750024	118475	1953.47	44.3134	1.73066	0	0	Null_Model_OpenChrom	human
Roadmapepigenomics_Histone_narrow	H1_Derived_Mesenchymal_Stem_Cells	H3K4ac	159524	273378	0.583529	81240	1766.62	44.3129	1.96361	0	0	Null_Model_OpenChrom	human
Roadmapepigenomics_Histone_narrow	IMR90_Cell_Line	H2A.Z	155327	273378	0.568177	76357.4	1782.11	44.3126	2.03421	0	0	Null_Model_OpenChrom	human
Roadmapepigenomics_ActiveChromatin	Gastric	ActiveChromatin	164217	273378	0.600696	82874.3	1835.67	44.3122	1.98152	0	0	Null_Model_OpenChrom	human
DNaseI_Duke	Mel_2183	Dnase	157984	273378	0.577896	79008	1782.27	44.312	1.99959	0	0	Null_Model_OpenChrom	human
Roadmapepigenomics_ActiveChromatin	Brain_Substantia_Nigra	ActiveChromatin	172110	273378	0.629568	92315.6	1800.78	44.3111	1.86437	0	0	Null_Model_OpenChrom	human
Roadmapepigenomics_Histone_narrow	Penis_Foreskin_Fibroblast_Primary_Cells_skin01	H3K4me3	162253	273378	0.593512	82151.5	1807.74	44.3103	1.97505	0	0	Null_Model_OpenChrom	human
Roadmapepigenomics_Histone_narrow	NHEK-Epidermal_Keratinocytes	H2A.Z	146458	273378	0.535734	69139.6	1744.93	44.3102	2.11829	0	0	Null_Model_OpenChrom	human
DNaseClusters	HRGEC	Dnase	159657	273378	0.584016	80598.9	1784.26	44.3086	1.98088	0	0	Null_Model_OpenChrom	human
Enhancers_Hnisz2013	CD14	Enhancer	122731	273378	0.448942	52182.6	1592.21	44.3083	2.35195	0	0	Null_Model_OpenChrom	human
Roadmapepigenomics_Histone_narrow	IMR90_Cell_Line	H4K8ac	152746	273378	0.558736	76836	1713.29	44.3065	1.98795	0	0	Null_Model_OpenChrom	human
Roadmapepigenomics_ActiveChromatin	Duodenum_Mucosa	7_Enh	136715	273378	0.500095	64585.8	1627.97	44.3063	2.1168	0	0	Null_Model_OpenChrom	human
Roadmapepigenomics_ActiveChromatin	HeLa-S3_Cervical_Carcinoma	ActiveChromatin	157283	273378	0.575332	80039.3	1743.45	44.305	1.96507	0	0	Null_Model_OpenChrom	human
DNaseClusters	HMVEC-dBl-Neo	Dnase	178291	273378	0.652178	96788.5	1839.58	44.3049	1.84207	0	0	Null_Model_OpenChrom	human
DNaseClusters	HMVEC-dBl-Ad	Dnase	176329	273378	0.645001	94312.9	1851.18	44.3047	1.86962	0	0	Null_Model_OpenChrom	human
Roadmapepigenomics_Dnase_narrow	Fetal_Intestine_Large	Dnase	186527	273378	0.682304	105376	1831.71	44.3032	1.77011	0	0	Null_Model_OpenChrom	human
DNaseI_Duke	K562+NaBut	Dnase	173382	273378	0.634221	92572.3	1824.02	44.303	1.87294	0	0	Null_Model_OpenChrom	human
Roadmapepigenomics_Histone_narrow	NHLF_Lung_Fibroblasts	H3K4me2	153343	273378	0.560919	75125.5	1765.56	44.3017	2.04116	0	0	Null_Model_OpenChrom	human
Enhancers_Hnisz2013	BI_CD34_Primary_RO01480	Enhancer	47435	273378	0.173514	12263.6	793.916	44.3012	3.86796	0	0	Null_Model_OpenChrom	human
Roadmapepigenomics_Histone_narrow	NHDF-Ad_Adult_Dermal_Fibroblasts	H3K4me2	152907	273378	0.559324	75882.9	1738.67	44.3005	2.01504	0	0	Null_Model_OpenChrom	human
Roadmapepigenomics_Histone_narrow	Osteoblasts	H2A.Z	154875	273378	0.566523	77498.3	1746.64	44.3002	1.99843	0	0	Null_Model_OpenChrom	human
Roadmapepigenomics_ActiveChromatin	Fetal_Intestine_Large	ActiveChromatin	172636	273378	0.631492	92135.4	1817.22	44.2988	1.87372	0	0	Null_Model_OpenChrom	human
DNaseClusters	HPDE6-E6E7	Dnase	161840	273378	0.592001	84422.8	1747.7	44.2966	1.91702	0	0	Null_Model_OpenChrom	human
Roadmapepigenomics_Histone_narrow	Mesenchymal_Stem_Cell_Derived_Adipocyte_Cultured_Cells	H3K9ac	155196	273378	0.567697	78966.6	1720.9	44.2963	1.96534	0	0	Null_Model_OpenChrom	human
Roadmapepigenomics_Histone_narrow	Penis_Foreskin_Fibroblast_Primary_Cells_skin02	H3K4me3	171945	273378	0.628964	91776.8	1809.89	44.2944	1.87351	0	0	Null_Model_OpenChrom	human
Roadmapepigenomics_ActiveChromatin	Placenta_Amnion	ActiveChromatin	153772	273378	0.562489	78503.9	1699.27	44.2944	1.95878	0	0	Null_Model_OpenChrom	human
DNaseI_Duke	Ishikawa+4OHTAM_100nM_30m	Dnase	162283	273378	0.593621	84674.7	1752.12	44.2939	1.91655	0	0	Null_Model_OpenChrom	human
DNaseClusters	K562	Dnase	185641	273378	0.679063	103391	1856.98	44.2924	1.79553	0	0	Null_Model_OpenChrom	human
DNaseI_Duke	Ishikawa+Estradiol_10nM_30m	Dnase	161474	273378	0.590662	83428.1	1762.07	44.2922	1.93549	0	0	Null_Model_OpenChrom	human
Roadmapepigenomics_Histone_narrow	H1_Derived_Neuronal_Progenitor_Cultured_Cells	H3K4me2	147991	273378	0.541342	75290	1641.4	44.292	1.96561	0	0	Null_Model_OpenChrom	human
Roadmapepigenomics_ActiveChromatin	Brain_Dorsolateral_Prefrontal_Cortex	ActiveChromatin	168254	273378	0.615463	89305.7	1782.49	44.2909	1.88402	0	0	Null_Model_OpenChrom	human
Roadmapepigenomics_ActiveChromatin	Brain_Hippocampus_Middle	ActiveChromatin	183605	273378	0.671616	103611	1806.11	44.2906	1.77205	0	0	Null_Model_OpenChrom	human
Roadmapepigenomics_Histone_narrow	HUVEC_Umbilical_Vein_Endothelial_Cells	H3K4me1	163288	273378	0.597298	86443.1	1735.04	44.29	1.88896	0	0	Null_Model_OpenChrom	human
Roadmapepigenomics_Histone_narrow	Brain_Mid_Frontal_Lobe	H3K27ac	177334	273378	0.648677	97900	1793.51	44.2897	1.81138	0	0	Null_Model_OpenChrom	human
Roadmapepigenomics_ActiveChromatin	HUVEC_Umbilical_Vein_Endothelial	ActiveChromatin	165611	273378	0.605795	89042.6	1728.81	44.2896	1.85991	0	0	Null_Model_OpenChrom	human
Roadmapepigenomics_ActiveChromatin	Skeletal_Muscle_Female	ActiveChromatin	190022	273378	0.695089	107677	1859.27	44.2892	1.76475	0	0	Null_Model_OpenChrom	human
Roadmapepigenomics_ActiveChromatin	Colonic_Mucosa	7_Enh	102405	273378	0.374591	43062.1	1339.91	44.2886	2.37807	0	0	Null_Model_OpenChrom	human
Roadmapepigenomics_ActiveChromatin	Brain_Anterior_Caudate	ActiveChromatin	178156	273378	0.651684	99921.6	1766.47	44.2885	1.78296	0	0	Null_Model_OpenChrom	human
Roadmapepigenomics_Histone_narrow	H9_Cell_Line	H3K23me2	147558	273378	0.539758	74512.2	1649.38	44.2869	1.98032	0	0	Null_Model_OpenChrom	human
Roadmapepigenomics_Histone_narrow	hESC_Derived_CD184+_Endoderm_Cultured_Cells	H3K4me3	131665	273378	0.481623	60705.7	1602.28	44.2863	2.16891	0	0	Null_Model_OpenChrom	human
Roadmapepigenomics_Histone_narrow	H9_Cell_Line	H3K79me2	70607	273378	0.258276	23437.8	1065.15	44.2842	3.01253	0	0	Null_Model_OpenChrom	human
Roadmapepigenomics_ActiveChromatin	HepG2_Hepatocellular_Carcinoma	ActiveChromatin	188222	273378	0.688505	106868	1837.09	44.2839	1.76125	0	0	Null_Model_OpenChrom	human
Roadmapepigenomics_Histone_narrow	HUES48_Cell_Line	H3K27ac	152874	273378	0.559204	76345	1728.18	44.2831	2.00241	0	0	Null_Model_OpenChrom	human
Roadmapepigenomics_Histone_narrow	H9_Cell_Line	H2A.Z	125405	273378	0.458724	57619.6	1530.73	44.2831	2.17643	0	0	Null_Model_OpenChrom	human
Roadmapepigenomics_Histone_narrow	H1_Cell_Line	H2BK5ac	138299	273378	0.505889	66303.3	1625.81	44.2829	2.08585	0	0	Null_Model_OpenChrom	human
Roadmapepigenomics_ActiveChromatin	ES-WA7	ActiveChromatin	155443	273378	0.568601	79219.8	1721.29	44.2827	1.96217	0	0	Null_Model_OpenChrom	human
Roadmapepigenomics_ActiveChromatin	Fetal_Intestine_Small	ActiveChromatin	176449	273378	0.64544	96446.8	1806.64	44.2823	1.8295	0	0	Null_Model_OpenChrom	human
Roadmapepigenomics_Histone_narrow	IMR90_Cell_Line	H3K27ac	151965	273378	0.555879	76653.4	1700.73	44.2819	1.98249	0	0	Null_Model_OpenChrom	human
DNaseI_Duke	MCF7+CTCF_shRNA_knockdown	Dnase	153749	273378	0.562404	77822.7	1714.61	44.2819	1.97563	0	0	Null_Model_OpenChrom	human
Roadmapepigenomics_ActiveChromatin	Brain_Inferior_Temporal_Lobe	ActiveChromatin	171899	273378	0.628796	95320.2	1729.36	44.2814	1.80338	0	0	Null_Model_OpenChrom	human
Roadmapepigenomics_Histone_narrow	Adipose_Derived_Mesenchymal_Stem_Cell_Cultured_Cells	H3K4me3	150580	273378	0.550812	74784.2	1711.7	44.281	2.01353	0	0	Null_Model_OpenChrom	human
DNaseClusters	HSMM_emb	Dnase	165677	273378	0.606036	87868.2	1757.18	44.2806	1.88552	0	0	Null_Model_OpenChrom	human
Roadmapepigenomics_ActiveChromatin	Brain_Cingulate_Gyrus	ActiveChromatin	171873	273378	0.628701	95025	1735.48	44.2805	1.80871	0	0	Null_Model_OpenChrom	human
DNaseClusters	HMVEC-LBl	Dnase	177281	273378	0.648483	96699.7	1819.81	44.2799	1.83331	0	0	Null_Model_OpenChrom	human
Roadmapepigenomics_ActiveChromatin	Fetal_Intestine_Small	3_TxFlnk	31050	273378	0.113579	6302.3	558.902	44.2791	4.92678	0	0	Null_Model_OpenChrom	human
Roadmapepigenomics_Dnase_narrow	Gastric	Dnase	175262	273378	0.641098	94688.7	1819.68	44.2789	1.85093	0	0	Null_Model_OpenChrom	human
Roadmapepigenomics_ActiveChromatin	Adipose_Nuclei	ActiveChromatin	194704	273378	0.712215	113303	1838.39	44.2783	1.71843	0	0	Null_Model_OpenChrom	human
Roadmapepigenomics_Histone_narrow	H1_BMP4_Derived_Trophoblast_Cultured_Cells	H4K8ac	166621	273378	0.609489	90533.1	1718.41	44.2781	1.84044	0	0	Null_Model_OpenChrom	human
Roadmapepigenomics_Histone_narrow	ES-WA7_Cell_Line	H3K4me3	129846	273378	0.474969	61058.1	1553.62	44.2758	2.1266	0	0	Null_Model_OpenChrom	human
DNaseClusters	HTR8svn	Dnase	158818	273378	0.580947	82667.6	1719.91	44.2758	1.92116	0	0	Null_Model_OpenChrom	human
Roadmapepigenomics_Histone_narrow	H1_Derived_Mesenchymal_Stem_Cells	H3K4me2	155900	273378	0.570273	79879.9	1716.99	44.2751	1.95168	0	0	Null_Model_OpenChrom	human
Roadmapepigenomics_Histone_narrow	IMR90_Cell_Line	H2BK5ac	138132	273378	0.505278	66146.2	1625.92	44.2738	2.08828	0	0	Null_Model_OpenChrom	human
Roadmapepigenomics_Histone_narrow	HMEC_Mammary_Epithelial	H2A.Z	155782	273378	0.569841	81489.4	1678.03	44.2736	1.91168	0	0	Null_Model_OpenChrom	human
Enhancers_Hnisz2013	BI_CD34_Primary_RO01549	Enhancer	51922	273378	0.189927	14530.5	844.575	44.2726	3.57331	0	0	Null_Model_OpenChrom	human
DNaseI_Duke	MCF7+Randomized_shRNA_control	Dnase	161493	273378	0.590732	85556.7	1715.2	44.2726	1.88756	0	0	Null_Model_OpenChrom	human
DNaseClusters	BE2_C	Dnase	170992	273378	0.625478	94697.5	1723.33	44.2714	1.80566	0	0	Null_Model_OpenChrom	human
Roadmapepigenomics_Histone_narrow	HeLa-S3_Cervical_Carcinoma	H3K4me1	158305	273378	0.57907	84293	1671.8	44.2708	1.87803	0	0	Null_Model_OpenChrom	human
Roadmapepigenomics_ActiveChromatin	Penis_Foreskin_Melanocyte_Primary_skin01	ActiveChromatin	173785	273378	0.635695	96648.6	1742.4	44.2701	1.79811	0	0	Null_Model_OpenChrom	human
Roadmapepigenomics_ActiveChromatin	iPS_DF_6.9	ActiveChromatin	157976	273378	0.577867	83667.9	1678.58	44.2684	1.88813	0	0	Null_Model_OpenChrom	human
Roadmapepigenomics_Histone_narrow	Adipose_Derived_Mesenchymal_Stem_Cell_Cultured_Cells	H3K9ac	158871	273378	0.58114	83632.4	1699.61	44.2681	1.89963	0	0	Null_Model_OpenChrom	human
Roadmapepigenomics_ActiveChromatin	Left_Ventricle	ActiveChromatin	180922	273378	0.661802	102336	1775.26	44.2674	1.76793	0	0	Null_Model_OpenChrom	human
DNaseI_Duke	ECC-1+Estradiol_10nM_30m	Dnase	164336	273378	0.601131	88140.8	1721.3	44.2662	1.86447	0	0	Null_Model_OpenChrom	human
Roadmapepigenomics_ActiveChromatin	Right_Atrium	ActiveChromatin	177921	273378	0.650824	99170.7	1779.03	44.2658	1.79409	0	0	Null_Model_OpenChrom	human
Roadmapepigenomics_Histone_narrow	H1_Derived_Mesenchymal_Stem_Cells	H3K9ac	152989	273378	0.559624	80630.1	1634.65	44.2656	1.89742	0	0	Null_Model_OpenChrom	human
Roadmapepigenomics_Histone_narrow	Duodenum_Smooth_Muscle	H3K4me1	181285	273378	0.663129	101713	1797.63	44.265	1.78232	0	0	Null_Model_OpenChrom	human
Roadmapepigenomics_Histone_narrow	H1_Derived_Mesenchymal_Stem_Cells	H4K8ac	172815	273378	0.632147	94654	1765.75	44.2649	1.82576	0	0	Null_Model_OpenChrom	human
Roadmapepigenomics_Histone_narrow	IMR90_Cell_Line	H4K5ac	155383	273378	0.568382	80246.5	1697.46	44.2642	1.93632	0	0	Null_Model_OpenChrom	human
Roadmapepigenomics_Histone_narrow	H1_BMP4_Derived_Mesendoderm_Cultured_Cells	H3K4ac	151330	273378	0.553556	76824.7	1683.2	44.264	1.96981	0	0	Null_Model_OpenChrom	human
Roadmapepigenomics_ActiveChromatin	H9	ActiveChromatin	152892	273378	0.55927	79799.7	1651.3	44.2634	1.91595	0	0	Null_Model_OpenChrom	human
Roadmapepigenomics_Histone_narrow	H1_Derived_Mesenchymal_Stem_Cells	H3K14ac	147112	273378	0.538127	74464	1641.32	44.262	1.97561	0	0	Null_Model_OpenChrom	human
Enhancers_Hnisz2013	Jurkat	Enhancer	60106	273378	0.219864	18692.5	935.69	44.2598	3.21551	0	0	Null_Model_OpenChrom	human
Roadmapepigenomics_Histone_narrow	H1_Derived_Mesenchymal_Stem_Cells	H3K18ac	163504	273378	0.598088	86907	1730.65	44.2591	1.88137	0	0	Null_Model_OpenChrom	human
Enhancers_Hnisz2013	UCSD_Sigmoid_Colon	Enhancer	106759	273378	0.390518	45985.7	1373.19	44.257	2.32157	0	0	Null_Model_OpenChrom	human
Roadmapepigenomics_Histone_narrow	HepG2_Hepatocellular_Carcinoma	H3K4me1	154606	273378	0.565539	80642.1	1671.27	44.256	1.91719	0	0	Null_Model_OpenChrom	human
Roadmapepigenomics_ActiveChromatin	Adult_Liver	7_Enh	145104	273378	0.530782	73519.5	1617.52	44.2558	1.97368	0	0	Null_Model_OpenChrom	human
Roadmapepigenomics_Histone_narrow	H1_Derived_Mesenchymal_Stem_Cells	H2BK120ac	151125	273378	0.552806	77448.5	1664.83	44.2545	1.9513	0	0	Null_Model_OpenChrom	human
Roadmapepigenomics_ActiveChromatin	Stomach_Smooth_Muscle	ActiveChromatin	173569	273378	0.634905	96896.2	1732.56	44.2541	1.79129	0	0	Null_Model_OpenChrom	human
Roadmapepigenomics_Histone_narrow	Skeletal_Muscle_Male	H3K4me1	185983	273378	0.680314	108118	1759.53	44.2535	1.72019	0	0	Null_Model_OpenChrom	human
Roadmapepigenomics_Histone_narrow	Rectal_Smooth_Muscle	H3K4me1	149155	273378	0.5456	76998.3	1630.54	44.2531	1.93712	0	0	Null_Model_OpenChrom	human
Roadmapepigenomics_ActiveChromatin	H9_Derived_Neuronal_Progenitor	ActiveChromatin	162563	273378	0.594646	88040	1684.03	44.2529	1.84647	0	0	Null_Model_OpenChrom	human
Roadmapepigenomics_Histone_narrow	Mesenchymal_Stem_Cell_Derived_Adipocyte_Cultured_Cells	H3K4me3	148819	273378	0.544371	74935.6	1669.58	44.2526	1.98596	0	0	Null_Model_OpenChrom	human
Roadmapepigenomics_ActiveChromatin	Fetal_Placenta	ActiveChromatin	190589	273378	0.697163	110497	1809.94	44.2511	1.72483	0	0	Null_Model_OpenChrom	human
Roadmapepigenomics_ActiveChromatin	Right_Ventricle	ActiveChromatin	173877	273378	0.636031	96713.5	1743.84	44.2493	1.79786	0	0	Null_Model_OpenChrom	human
DNaseClusters	HGF	Dnase	159415	273378	0.58313	86424.9	1649.53	44.249	1.84455	0	0	Null_Model_OpenChrom	human
Roadmapepigenomics_ActiveChromatin	H1_BMP4_Derived_Mesendoderm	ActiveChromatin	143810	273378	0.526048	71408.4	1636.26	44.2484	2.01391	0	0	Null_Model_OpenChrom	human
DNaseI_Duke	HepG2	Dnase	169087	273378	0.61851	92784.6	1724.41	44.2483	1.82236	0	0	Null_Model_OpenChrom	human
Roadmapepigenomics_Histone_narrow	NH-A_Astrocytes	H3K27ac	141948	273378	0.519237	71326.9	1596.03	44.2481	1.99011	0	0	Null_Model_OpenChrom	human
Roadmapepigenomics_ActiveChromatin	ES-I3	2_TssAFlnk	60331	273378	0.220687	18978.6	934.568	44.2476	3.1789	0	0	Null_Model_OpenChrom	human
Roadmapepigenomics_Histone_narrow	HMEC_Mammary_Epithelial	H3K4me2	154196	273378	0.56404	80609.2	1663.07	44.2475	1.91288	0	0	Null_Model_OpenChrom	human
Roadmapepigenomics_Histone_narrow	IMR90_Cell_Line	H3K79me1	139653	273378	0.510842	69246.4	1591.2	44.2474	2.01676	0	0	Null_Model_OpenChrom	human
Roadmapepigenomics_Histone_narrow	H1_Derived_Mesenchymal_Stem_Cells	H3K27ac	131393	273378	0.480628	63469.1	1535.1	44.2473	2.07019	0	0	Null_Model_OpenChrom	human
Roadmapepigenomics_Histone_narrow	NHEK-Epidermal_Keratinocytes	H3K4me2	162674	273378	0.595052	89674.7	1649.81	44.247	1.81405	0	0	Null_Model_OpenChrom	human
DNaseI_Duke	Cerebellum_OC	Dnase	156753	273378	0.573393	83052.5	1665.66	44.247	1.8874	0	0	Null_Model_OpenChrom	human
Roadmapepigenomics_Histone_narrow	H1_Derived_Mesenchymal_Stem_Cells	H3K4me3	146566	273378	0.536129	75757	1600.33	44.2466	1.93468	0	0	Null_Model_OpenChrom	human
DNaseI_Duke	Monocytes_CD14+	Dnase	188284	273378	0.688731	109733	1775.43	44.2434	1.71583	0	0	Null_Model_OpenChrom	human
Roadmapepigenomics_Histone_narrow	Spleen	H3K4me1	218269	273378	0.798415	139169	1787.86	44.2432	1.56838	0	0	Null_Model_OpenChrom	human
Roadmapepigenomics_Histone_narrow	H9_Cell_Line	H2BK120ac	121221	273378	0.443419	56397.4	1465.17	44.2432	2.14941	0	0	Null_Model_OpenChrom	human
Roadmapepigenomics_ActiveChromatin	Colon_Smooth_Muscle	ActiveChromatin	168654	273378	0.616926	91780.1	1737.54	44.243	1.83759	0	0	Null_Model_OpenChrom	human
DNaseClusters	RPTEC	Dnase	167108	273378	0.611271	92660.1	1682.79	44.2408	1.80345	0	0	Null_Model_OpenChrom	human
Roadmapepigenomics_Histone_narrow	H1_BMP4_Derived_Trophoblast_Cultured_Cells	H4K12ac	161290	273378	0.589989	87219.1	1674.3	44.24	1.84925	0	0	Null_Model_OpenChrom	human
DNaseClusters	Huh-7	Dnase	164779	273378	0.602752	90168.4	1686.5	44.2399	1.82746	0	0	Null_Model_OpenChrom	human
Roadmapepigenomics_Histone_narrow	Stomach_Mucosa	H3K4me1	188074	273378	0.687963	111187	1738.06	44.2375	1.69151	0	0	Null_Model_OpenChrom	human
Roadmapepigenomics_Histone_narrow	HSMMtube_Skeletal_Muscle_Myotubes_Derived_from_HSMM	H3K27ac	148902	273378	0.544674	77743.4	1608.59	44.2366	1.9153	0	0	Null_Model_OpenChrom	human
Roadmapepigenomics_ActiveChromatin	CD19_Primary_Peripheral_UW	3_TxFlnk	14122	273378	0.0516574	1738.48	279.938	44.2366	8.12318	0	0	Null_Model_OpenChrom	human
Roadmapepigenomics_Histone_narrow	A549_EtOH_0.02pct_Lung_Carcinoma	H3K4me2	153348	273378	0.560938	79041.3	1679.8	44.2354	1.9401	0	0	Null_Model_OpenChrom	human
Roadmapepigenomics_Histone_narrow	H1_BMP4_Derived_Trophoblast_Cultured_Cells	H3K79me1	163508	273378	0.598102	87594.5	1716.14	44.2349	1.86665	0	0	Null_Model_OpenChrom	human
Roadmapepigenomics_Histone_narrow	H9_Cell_Line	H3K18ac	156810	273378	0.573601	82784.7	1673.49	44.2342	1.89419	0	0	Null_Model_OpenChrom	human
Roadmapepigenomics_Histone_narrow	IMR90_Cell_Line	H3K4ac	150383	273378	0.550092	78066.6	1634.87	44.2336	1.92634	0	0	Null_Model_OpenChrom	human
DNaseClusters	AG09319	Dnase	159416	273378	0.583134	86134	1656.72	44.2333	1.85079	0	0	Null_Model_OpenChrom	human
Roadmapepigenomics_ActiveChromatin	Pancreas	ActiveChromatin	173449	273378	0.634466	97355.6	1720.31	44.2324	1.7816	0	0	Null_Model_OpenChrom	human
Roadmapepigenomics_Histone_narrow	Skeletal_Muscle_Female	H3K4me1	200248	273378	0.732495	122401	1759.96	44.2323	1.636	0	0	Null_Model_OpenChrom	human
Roadmapepigenomics_ActiveChromatin	Skeletal_Muscle_Male	ActiveChromatin	189233	273378	0.692203	111503	1757.35	44.2315	1.69711	0	0	Null_Model_OpenChrom	human
Roadmapepigenomics_Histone_narrow	IMR90_Cell_Line	H3K14ac	142558	273378	0.521468	72026.6	1594.64	44.2302	1.97924	0	0	Null_Model_OpenChrom	human
Roadmapepigenomics_Histone_narrow	Brain_Substantia_Nigra	H3K4me1	180235	273378	0.659289	105341	1693.28	44.2299	1.71096	0	0	Null_Model_OpenChrom	human
DNaseI_Duke	ECC-1+DMSO_0.02pct	Dnase	162555	273378	0.594616	86977.7	1708.76	44.2294	1.86893	0	0	Null_Model_OpenChrom	human
DNaseClusters	AG04450	Dnase	164403	273378	0.601376	90441.2	1672.27	44.2285	1.81779	0	0	Null_Model_OpenChrom	human
Roadmapepigenomics_Dnase_narrow	HUVEC_Umbilical_Vein_Endothelial_Cells	Dnase	172923	273378	0.632542	97294	1710.05	44.2261	1.77732	0	0	Null_Model_OpenChrom	human
Roadmapepigenomics_Histone_narrow	H1_BMP4_Derived_Trophoblast_Cultured_Cells	H4K91ac	163065	273378	0.596482	90764.8	1634.86	44.2242	1.79657	0	0	Null_Model_OpenChrom	human
Roadmapepigenomics_Histone_narrow	H9_Derived_Neuronal_Progenitor_Cultured_Cells	H2A.Z	159580	273378	0.583734	86705.7	1647.98	44.2205	1.84048	0	0	Null_Model_OpenChrom	human
DNaseClusters	HEK293T	Dnase	155951	273378	0.570459	84984.2	1604.89	44.2192	1.83506	0	0	Null_Model_OpenChrom	human
Roadmapepigenomics_Histone_narrow	H1_BMP4_Derived_Mesendoderm_Cultured_Cells	H2BK5ac	73796	273378	0.269941	26875.4	1061.13	44.2176	2.74585	0	0	Null_Model_OpenChrom	human
Roadmapepigenomics_Histone_narrow	H9_Cell_Line	H3K79me1	108830	273378	0.398093	48219.6	1370.77	44.2165	2.25697	0	0	Null_Model_OpenChrom	human
DNaseClusters	Caco-2	Dnase	156069	273378	0.570891	83874	1632.79	44.2157	1.86076	0	0	Null_Model_OpenChrom	human
Roadmapepigenomics_Histone_narrow	Brain_Inferior_Temporal_Lobe	H3K4me1	168333	273378	0.615752	94592.8	1667.79	44.2142	1.77955	0	0	Null_Model_OpenChrom	human
Roadmapepigenomics_Histone_narrow	Fetal_Intestine_Large	H3K4me1	179054	273378	0.654969	104497	1686.29	44.2138	1.71349	0	0	Null_Model_OpenChrom	human
Roadmapepigenomics_Histone_narrow	H9_Cell_Line	H2BK5ac	85559	273378	0.31297	34520.1	1154.37	44.2135	2.47853	0	0	Null_Model_OpenChrom	human
Roadmapepigenomics_Histone_narrow	Fetal_Intestine_Small	H3K4me1	186013	273378	0.680424	110807	1700.97	44.2135	1.67871	0	0	Null_Model_OpenChrom	human
Roadmapepigenomics_Histone_narrow	Brain_Hippocampus_Middle	H3K4me1	191039	273378	0.698809	117852	1655.36	44.2122	1.62101	0	0	Null_Model_OpenChrom	human
Roadmapepigenomics_Histone_narrow	Muscle_Satellite_Cultured_Cells	H3K4me2	159648	273378	0.583983	86159.1	1662.22	44.2114	1.85294	0	0	Null_Model_OpenChrom	human
Roadmapepigenomics_Histone_narrow	Fetal_Placenta	H3K4me1	187959	273378	0.687543	110705	1747.38	44.2113	1.69784	0	0	Null_Model_OpenChrom	human
DNaseI_Duke	Urothelia	Dnase	155050	273378	0.567163	83266.1	1623.74	44.2091	1.8621	0	0	Null_Model_OpenChrom	human
DNaseI_Duke	HEK293T	Dnase	155951	273378	0.570459	84971.5	1605.54	44.2091	1.83533	0	0	Null_Model_OpenChrom	human
Roadmapepigenomics_Histone_narrow	Right_Ventricle	H3K27ac	187260	273378	0.684986	113144	1676.54	44.2079	1.65506	0	0	Null_Model_OpenChrom	human
Roadmapepigenomics_Histone_narrow	H1_BMP4_Derived_Trophoblast_Cultured_Cells	H2A.Z	177366	273378	0.648794	102438	1694.95	44.207	1.73146	0	0	Null_Model_OpenChrom	human
DNaseI_Duke	Gliobla	Dnase	164305	273378	0.601018	91154.5	1654.73	44.2069	1.80249	0	0	Null_Model_OpenChrom	human
Enhancers_Hnisz2013	UCSD_Spleen	Enhancer	120519	273378	0.440851	57429.7	1427.17	44.206	2.09855	0	0	Null_Model_OpenChrom	human
DNaseClusters	HConF	Dnase	166147	273378	0.607756	93182.7	1650.57	44.2055	1.78302	0	0	Null_Model_OpenChrom	human
DNaseClusters	RWPE1	Dnase	164878	273378	0.603114	92814.9	1630.19	44.2053	1.77642	0	0	Null_Model_OpenChrom	human
DNaseI_Duke	HUVEC	Dnase	169317	273378	0.619351	96472.4	1647.92	44.204	1.75508	0	0	Null_Model_OpenChrom	human
Roadmapepigenomics_Histone_narrow	Colon_Smooth_Muscle	H3K4me1	166481	273378	0.608977	94119.9	1637.09	44.201	1.76882	0	0	Null_Model_OpenChrom	human
Roadmapepigenomics_ActiveChromatin	Fetal_Brain_Female	ActiveChromatin	148148	273378	0.541916	78635.5	1572.67	44.2004	1.88398	0	0	Null_Model_OpenChrom	human
DNaseI_Duke	HTR8svn	Dnase	158852	273378	0.581071	87601.5	1612	44.2002	1.81335	0	0	Null_Model_OpenChrom	human
Roadmapepigenomics_ActiveChromatin	CD19_Primary_Peripheral_UW	6_EnhG	46407	273378	0.169754	13184.7	751.639	44.1999	3.51977	0	0	Null_Model_OpenChrom	human
Roadmapepigenomics_Histone_narrow	Osteoblasts	H3K27ac	152496	273378	0.557821	81662.5	1602.6	44.1991	1.86739	0	0	Null_Model_OpenChrom	human
DNaseI_Duke	HPDE6-E6E7	Dnase	162988	273378	0.5962	90146.1	1648.09	44.1977	1.80804	0	0	Null_Model_OpenChrom	human
Roadmapepigenomics_ActiveChromatin	Penis_Foreskin_Melanocyte_Primary_skin03	ActiveChromatin	174339	273378	0.637721	101967	1637.47	44.1974	1.70976	0	0	Null_Model_OpenChrom	human
Roadmapepigenomics_Histone_narrow	Brain_Angular_Gyrus	H3K4me1	174971	273378	0.640033	102390	1642.25	44.1961	1.70887	0	0	Null_Model_OpenChrom	human
DNaseClusters	HCF	Dnase	173898	273378	0.636108	102986	1604.48	44.196	1.68855	0	0	Null_Model_OpenChrom	human
DNaseI_Duke	Urothelia+UT189	Dnase	156293	273378	0.57171	84959.9	1614.04	44.1954	1.83961	0	0	Null_Model_OpenChrom	human
Roadmapepigenomics_ActiveChromatin	A549_EtOH_0.02pct_Lung_Carcinoma	ActiveChromatin	166896	273378	0.610495	93982	1649.82	44.1951	1.77583	0	0	Null_Model_OpenChrom	human
DNaseClusters	WERI-Rb-1	Dnase	168277	273378	0.615547	98833.2	1571.34	44.194	1.70264	0	0	Null_Model_OpenChrom	human
DNaseI_Duke	Colo829	Dnase	155826	273378	0.570002	85356.7	1594.56	44.1936	1.82559	0	0	Null_Model_OpenChrom	human
Roadmapepigenomics_Dnase_narrow	HepG2_Hepatocellular_Carcinoma	Dnase	186647	273378	0.682743	111971	1689.77	44.1933	1.66693	0	0	Null_Model_OpenChrom	human
DNaseClusters	HRE	Dnase	180150	273378	0.658978	106339	1670.19	44.193	1.6941	0	0	Null_Model_OpenChrom	human
DNaseClusters	HRCEpiC	Dnase	178517	273378	0.653004	104987	1663.87	44.192	1.70037	0	0	Null_Model_OpenChrom	human
Roadmapepigenomics_ActiveChromatin	Neurosphere_Ganglionic_Eminence_Derived	ActiveChromatin	163671	273378	0.598699	94087.3	1574.62	44.1908	1.73957	0	0	Null_Model_OpenChrom	human
DNaseClusters	A549	Dnase	163382	273378	0.597641	92319	1608.11	44.1905	1.76975	0	0	Null_Model_OpenChrom	human
Roadmapepigenomics_Histone_narrow	CD4+_CD25+_CD127-_Treg_Primary_CellsTh	H3K36me3	115105	273378	0.421047	54933.5	1361.66	44.1899	2.09535	0	0	Null_Model_OpenChrom	human
DNaseClusters	HPF	Dnase	167177	273378	0.611523	93769.4	1661.19	44.1897	1.78285	0	0	Null_Model_OpenChrom	human
Roadmapepigenomics_Histone_narrow	Breast_Myoepithelial_Cells	H3K9ac	168435	273378	0.616125	97290.6	1609.98	44.1896	1.73126	0	0	Null_Model_OpenChrom	human
Roadmapepigenomics_Histone_narrow	IMR90_Cell_Line	H3K4me2	163673	273378	0.598706	90885.8	1647.17	44.1894	1.80086	0	0	Null_Model_OpenChrom	human
DNaseClusters	HVMF	Dnase	168264	273378	0.615499	95834.2	1639.09	44.1891	1.75578	0	0	Null_Model_OpenChrom	human
Roadmapepigenomics_Histone_narrow	H1_BMP4_Derived_Mesendoderm_Cultured_Cells	H2BK120ac	130814	273378	0.47851	65798.8	1471.3	44.1888	1.98809	0	0	Null_Model_OpenChrom	human
DNaseI_Duke	Heart_OC	Dnase	170440	273378	0.623459	98521.2	1627.54	44.1887	1.72998	0	0	Null_Model_OpenChrom	human
Roadmapepigenomics_Histone_narrow	Adipose_Nuclei	H3K4me1	205120	273378	0.750316	128534	1733.2	44.1879	1.59585	0	0	Null_Model_OpenChrom	human
Roadmapepigenomics_Histone_narrow	IMR90_Cell_Line	H3K18ac	150119	273378	0.549126	82309.2	1534.58	44.1878	1.82384	0	0	Null_Model_OpenChrom	human
Roadmapepigenomics_Histone_narrow	H1_BMP4_Derived_Trophoblast_Cultured_Cells	H3K18ac	172909	273378	0.632491	99671.1	1657.44	44.1873	1.7348	0	0	Null_Model_OpenChrom	human
Roadmapepigenomics_Histone_narrow	IMR90_Cell_Line	H4K91ac	148312	273378	0.542516	79746.4	1551.73	44.1866	1.8598	0	0	Null_Model_OpenChrom	human
Roadmapepigenomics_ActiveChromatin	NHLF_Lung_Fibroblasts	ActiveChromatin	163790	273378	0.599134	92022	1624.26	44.1851	1.7799	0	0	Null_Model_OpenChrom	human
Roadmapepigenomics_Histone_narrow	H1_BMP4_Derived_Trophoblast_Cultured_Cells	H2BK120ac	163610	273378	0.598475	93240.2	1592.63	44.1846	1.75471	0	0	Null_Model_OpenChrom	human
Roadmapepigenomics_ActiveChromatin	H1_Derived_Neuronal_Progenitor	ActiveChromatin	154960	273378	0.566834	85926.8	1562.38	44.1845	1.80339	0	0	Null_Model_OpenChrom	human
DNaseClusters	PrEC	Dnase	163758	273378	0.599017	94212.7	1574.01	44.1835	1.73817	0	0	Null_Model_OpenChrom	human
DNaseI_Duke	Olf_neurosphere	Dnase	157017	273378	0.574359	86942	1586.05	44.1822	1.806	0	0	Null_Model_OpenChrom	human
Roadmapepigenomics_Histone_narrow	Brain_Cingulate_Gyrus	H3K4me1	181147	273378	0.662625	109475	1622.22	44.1812	1.65468	0	0	Null_Model_OpenChrom	human
DNaseI_Duke	MCF7	Dnase	161401	273378	0.590395	91856.5	1574.1	44.1806	1.7571	0	0	Null_Model_OpenChrom	human
Roadmapepigenomics_Histone_narrow	HSMMtube_Skeletal_Muscle_Myotubes_Derived_from_HSMM	H2A.Z	162276	273378	0.593596	91589.6	1599.96	44.18	1.77177	0	0	Null_Model_OpenChrom	human
Roadmapepigenomics_Histone_narrow	H1_BMP4_Derived_Trophoblast_Cultured_Cells	H2BK5ac	159644	273378	0.583968	88856	1602.27	44.1798	1.79666	0	0	Null_Model_OpenChrom	human
DNaseClusters	WI-38	Dnase	168967	273378	0.618071	95838.7	1655.25	44.1795	1.76304	0	0	Null_Model_OpenChrom	human
Roadmapepigenomics_Histone_narrow	Stomach_Smooth_Muscle	H3K4me1	174549	273378	0.63849	101865	1645.24	44.1781	1.71353	0	0	Null_Model_OpenChrom	human
Roadmapepigenomics_Histone_narrow	H1_Cell_Line	H3K4me2	162797	273378	0.595501	92625.8	1588.38	44.1779	1.75758	0	0	Null_Model_OpenChrom	human
Roadmapepigenomics_Histone_narrow	Osteoblasts	H3K4me2	167112	273378	0.611285	95384.2	1623.64	44.1772	1.75199	0	0	Null_Model_OpenChrom	human
Roadmapepigenomics_Histone_narrow	HSMMtube_Skeletal_Muscle_Myotubes_Derived_from_HSMM	H3K4me2	162272	273378	0.593581	90475.9	1625.23	44.1759	1.79354	0	0	Null_Model_OpenChrom	human
Roadmapepigenomics_Histone_narrow	Chondrocytes_from_Bone_Marrow_Derived_Mesenchymal_Stem_Cell_Cultured_Cells	H3K27ac	149557	273378	0.54707	80863	1555.02	44.1756	1.84951	0	0	Null_Model_OpenChrom	human
DNaseClusters	LNCaP+androgen	Dnase	162408	273378	0.594079	92098.7	1591.59	44.1754	1.76341	0	0	Null_Model_OpenChrom	human
DNaseClusters	HUVEC	Dnase	174910	273378	0.63981	104297	1598.48	44.1748	1.67703	0	0	Null_Model_OpenChrom	human
Roadmapepigenomics_Dnase_narrow	HeLa-S3_Cervical_Carcinoma	Dnase	168506	273378	0.616385	97911.4	1598.15	44.1727	1.721	0	0	Null_Model_OpenChrom	human
Roadmapepigenomics_Histone_narrow	Bone_Marrow_Derived_Mesenchymal_Stem_Cell_Cultured_Cells	H3K27ac	141675	273378	0.518238	75266	1503.43	44.1717	1.88232	0	0	Null_Model_OpenChrom	human
DNaseI_Duke	SK-N-SH	Dnase	157377	273378	0.575675	88292.5	1564.04	44.1705	1.78245	0	0	Null_Model_OpenChrom	human
DNaseClusters	HepG2	Dnase	179589	273378	0.656926	108738	1604.08	44.1695	1.65158	0	0	Null_Model_OpenChrom	human
DNaseI_Duke	AoSMC+serum_free_media	Dnase	158222	273378	0.578766	87908.9	1591.96	44.1677	1.79984	0	0	Null_Model_OpenChrom	human
DNaseI_Duke	MCF7+Hypoxia_LacAcid_ctrl	Dnase	168336	273378	0.615763	99232.3	1564.59	44.1674	1.69638	0	0	Null_Model_OpenChrom	human
Roadmapepigenomics_ActiveChromatin	Penis_Foreskin_Fibroblast_Primary_skin02	ActiveChromatin	185015	273378	0.676774	113953	1608.97	44.166	1.6236	0	0	Null_Model_OpenChrom	human
Roadmapepigenomics_Histone_narrow	H1_BMP4_Derived_Trophoblast_Cultured_Cells	H3K14ac	161963	273378	0.592451	90940.8	1608.09	44.1655	1.78097	0	0	Null_Model_OpenChrom	human
DNaseI_Duke	MCF7+Hypoxia_LacAcid	Dnase	161136	273378	0.589426	92029.9	1564.77	44.1636	1.75091	0	0	Null_Model_OpenChrom	human
DNaseClusters	Th1	Dnase	217925	273378	0.797156	147180	1601.92	44.1629	1.48067	0	0	Null_Model_OpenChrom	human
DNaseClusters	AG10803	Dnase	167639	273378	0.613213	98741.6	1560.18	44.1598	1.69775	0	0	Null_Model_OpenChrom	human
Roadmapepigenomics_Histone_narrow	H1_BMP4_Derived_Trophoblast_Cultured_Cells	H2AK5ac	160806	273378	0.588219	92036.2	1557.3	44.1597	1.7472	0	0	Null_Model_OpenChrom	human
Roadmapepigenomics_Histone_narrow	Monocytes-CD14+_RO01746	H4K20me1	109178	273378	0.399366	51531.9	1305.42	44.1592	2.11865	0	0	Null_Model_OpenChrom	human
DNaseClusters	AoSMC+serum_free_media	Dnase	167244	273378	0.611768	97350.2	1582.77	44.1592	1.71796	0	0	Null_Model_OpenChrom	human
BroadChromHMM	HUVEC	StrongEnhancer	100814	273378	0.368771	45209.9	1259.2	44.1581	2.22991	0	0	Null_Model_OpenChrom	human
DNaseClusters	Stellate	Dnase	174137	273378	0.636982	102701	1617.79	44.1566	1.69558	0	0	Null_Model_OpenChrom	human
DNaseClusters	H9ES	Dnase	168536	273378	0.616494	99803.3	1556.57	44.1565	1.68868	0	0	Null_Model_OpenChrom	human
Roadmapepigenomics_ActiveChromatin	HSMM_Skeletal_Muscle_Myoblasts	ActiveChromatin	171491	273378	0.627304	101449	1586.25	44.156	1.69042	0	0	Null_Model_OpenChrom	human
Roadmapepigenomics_Histone_narrow	H1_Cell_Line	H3K79me1	98628	273378	0.360775	45260.9	1208.65	44.1544	2.1791	0	0	Null_Model_OpenChrom	human
Roadmapepigenomics_ActiveChromatin	Fetal_Adrenal_Gland	7_Enh	140561	273378	0.514164	76313	1455.08	44.1544	1.8419	0	0	Null_Model_OpenChrom	human
Enhancers_Hnisz2013	UCSD_Small_Intestine	Enhancer	107257	273378	0.39234	50396.9	1287.76	44.1544	2.12825	0	0	Null_Model_OpenChrom	human
Roadmapepigenomics_Dnase_narrow	Fetal_Stomach	Dnase	201712	273378	0.73785	129769	1629.37	44.1535	1.55439	0	0	Null_Model_OpenChrom	human
DNaseClusters	T-47D	Dnase	160276	273378	0.58628	90741.4	1574.9	44.1518	1.76629	0	0	Null_Model_OpenChrom	human
Roadmapepigenomics_Dnase_narrow	Pancreas	Dnase	199889	273378	0.731182	126856	1654.16	44.1512	1.57572	0	0	Null_Model_OpenChrom	human
Roadmapepigenomics_Histone_narrow	Brain_Germinal_Matrix	H3K4me1	118597	273378	0.433821	58639.7	1358.03	44.1503	2.02247	0	0	Null_Model_OpenChrom	human
DNaseI_Duke	A549	Dnase	158716	273378	0.580573	89203.3	1574.49	44.1494	1.77926	0	0	Null_Model_OpenChrom	human
DNaseI_Duke	HeLa-S3	Dnase	171253	273378	0.626433	101033	1590.63	44.1463	1.69502	0	0	Null_Model_OpenChrom	human
DNaseI_Duke	RWPE1	Dnase	162871	273378	0.595772	93763.8	1565.42	44.146	1.73704	0	0	Null_Model_OpenChrom	human
Roadmapepigenomics_ActiveChromatin	Brain_Germinal_Matrix	ActiveChromatin	150973	273378	0.55225	83759	1522.55	44.1456	1.80247	0	0	Null_Model_OpenChrom	human
DNaseClusters	AG04449	Dnase	163637	273378	0.598574	95865.8	1535.21	44.1446	1.70694	0	0	Null_Model_OpenChrom	human
Roadmapepigenomics_Histone_narrow	Penis_Foreskin_Fibroblast_Primary_Cells_skin02	H3K27ac	188787	273378	0.690571	118740	1586.83	44.143	1.58992	0	0	Null_Model_OpenChrom	human
Roadmapepigenomics_ActiveChromatin	HSMMtube_Skeletal_Muscle_Myotubes_Derived_from_HSMM	ActiveChromatin	172307	273378	0.630288	103049	1568.99	44.1415	1.67208	0	0	Null_Model_OpenChrom	human
DNaseClusters	HPdLF	Dnase	165933	273378	0.606973	96539.1	1572.1	44.1409	1.71882	0	0	Null_Model_OpenChrom	human
Roadmapepigenomics_ActiveChromatin	iPS-20b	ActiveChromatin	165905	273378	0.60687	97113.3	1558.68	44.1346	1.70836	0	0	Null_Model_OpenChrom	human
Roadmapepigenomics_Histone_narrow	H1_Cell_Line	H3K18ac	160871	273378	0.588456	93495.7	1526.62	44.1337	1.72062	0	0	Null_Model_OpenChrom	human
Roadmapepigenomics_ActiveChromatin	Fetal_Adrenal_Gland	ActiveChromatin	191486	273378	0.700444	120708	1603.73	44.1331	1.58635	0	0	Null_Model_OpenChrom	human
Roadmapepigenomics_Dnase_narrow	Psoas_Muscle	Dnase	212040	273378	0.775629	140993	1609.85	44.1324	1.5039	0	0	Null_Model_OpenChrom	human
Roadmapepigenomics_ActiveChromatin	H1_Derived_Mesenchymal_Stem_Cells	ActiveChromatin	188416	273378	0.689214	117507	1606.73	44.1323	1.60344	0	0	Null_Model_OpenChrom	human
DNaseClusters	AoAF	Dnase	169097	273378	0.618546	100816	1547.23	44.131	1.67728	0	0	Null_Model_OpenChrom	human
Roadmapepigenomics_Histone_narrow	Brain_Anterior_Caudate	H3K4me1	187006	273378	0.684057	115867	1612	44.1307	1.61397	0	0	Null_Model_OpenChrom	human
DNaseI_Duke	FibroP_AG08395	Dnase	167056	273378	0.611081	100235	1514.17	44.1306	1.66665	0	0	Null_Model_OpenChrom	human
Roadmapepigenomics_ActiveChromatin	Fetal_Heart	ActiveChromatin	172948	273378	0.632633	104502	1551	44.1305	1.65498	0	0	Null_Model_OpenChrom	human
DNaseI_Duke	Huh-7	Dnase	168594	273378	0.616707	100498	1543.09	44.1299	1.67759	0	0	Null_Model_OpenChrom	human
DNaseI_Duke	Frontal_cortex_OC	Dnase	157363	273378	0.575624	89746.1	1532.23	44.1296	1.75342	0	0	Null_Model_OpenChrom	human
DNaseClusters	HeLa-S3	Dnase	169798	273378	0.621111	101831	1540.17	44.1294	1.66745	0	0	Null_Model_OpenChrom	human
Enhancers_Hnisz2013	K562	Enhancer	63689	273378	0.23297	23914.5	901.323	44.129	2.66319	0	0	Null_Model_OpenChrom	human
DNaseI_Duke	Fibrobl	Dnase	163431	273378	0.597821	96426	1518.41	44.1284	1.69489	0	0	Null_Model_OpenChrom	human
DNaseClusters	BJ	Dnase	163840	273378	0.599317	95265.5	1554.02	44.1273	1.71983	0	0	Null_Model_OpenChrom	human
Roadmapepigenomics_ActiveChromatin	H1	ActiveChromatin	171800	273378	0.628434	102687	1566.23	44.1272	1.67305	0	0	Null_Model_OpenChrom	human
FANTOM5_enhancer_cell	lymphocyte_of_B_lineage	Enhancer	15672	273378	0.0573272	2288.94	303.288	44.1265	6.84682	0	0	Null_Model_OpenChrom	human
DNaseClusters	MCF-7+Hypoxia_LacAcid	Dnase	163751	273378	0.598991	95366.5	1549.81	44.1244	1.71707	0	0	Null_Model_OpenChrom	human
Roadmapepigenomics_ActiveChromatin	Fetal_Muscle_Trunk	ActiveChromatin	186912	273378	0.683713	117211	1579.66	44.1239	1.59466	0	0	Null_Model_OpenChrom	human
Roadmapepigenomics_Histone_narrow	H1_Derived_Mesenchymal_Stem_Cells	H2A.Z	165421	273378	0.6051	97041.1	1549.73	44.1237	1.70465	0	0	Null_Model_OpenChrom	human
Roadmapepigenomics_ActiveChromatin	iPS-15b	ActiveChromatin	170949	273378	0.625321	102197	1558.16	44.1236	1.67273	0	0	Null_Model_OpenChrom	human
Roadmapepigenomics_Histone_narrow	H1_Cell_Line	H4K91ac	104625	273378	0.382712	49233.1	1255.4	44.1229	2.1251	0	0	Null_Model_OpenChrom	human
Roadmapepigenomics_ActiveChromatin	NHEK-Epidermal_Keratinocytes	ActiveChromatin	173720	273378	0.635457	105682	1542.01	44.1227	1.6438	0	0	Null_Model_OpenChrom	human
Roadmapepigenomics_Histone_narrow	Neurosphere_Cultured_Cells_Ganglionic_Eminence_Derived	H3K4me1	157256	273378	0.575233	90913.7	1503.61	44.1219	1.72973	0	0	Null_Model_OpenChrom	human
Roadmapepigenomics_ActiveChromatin	Fetal_Muscle_Leg	ActiveChromatin	196065	273378	0.717194	127584	1552.1	44.1218	1.53676	0	0	Null_Model_OpenChrom	human
Roadmapepigenomics_Histone_narrow	Spleen	H3K4me3	173510	273378	0.634689	105531	1540.72	44.1216	1.64416	0	0	Null_Model_OpenChrom	human
Roadmapepigenomics_ActiveChromatin	Fetal_Stomach	ActiveChromatin	171756	273378	0.628273	104860	1516.18	44.1214	1.63796	0	0	Null_Model_OpenChrom	human
Roadmapepigenomics_Histone_narrow	H9_Cell_Line	H3T11ph	103993	273378	0.3804	50368.9	1215.44	44.1192	2.06463	0	0	Null_Model_OpenChrom	human
Roadmapepigenomics_Histone_narrow	H1_BMP4_Derived_Mesendoderm_Cultured_Cells	H3K79me1	82394	273378	0.301392	35406.7	1065.06	44.1171	2.32707	0	0	Null_Model_OpenChrom	human
Roadmapepigenomics_Dnase_narrow	H9_Cell_Line	Dnase	177513	273378	0.649332	108274	1569.49	44.1155	1.63948	0	0	Null_Model_OpenChrom	human
Roadmapepigenomics_Histone_narrow	Neurosphere_Cultured_Cells_Cortex_Derived	H3K4me1	165639	273378	0.605897	99202.1	1506.03	44.114	1.66971	0	0	Null_Model_OpenChrom	human
DNaseI_Duke	Melano	Dnase	162060	273378	0.592806	95846	1501.08	44.1108	1.69084	0	0	Null_Model_OpenChrom	human
DNaseI_Duke	Stellate	Dnase	171539	273378	0.627479	102894	1556.21	44.1101	1.66714	0	0	Null_Model_OpenChrom	human
DNaseClusters	HFF-Myc	Dnase	184338	273378	0.674297	116043	1548.31	44.1095	1.58854	0	0	Null_Model_OpenChrom	human
DNaseClusters	Gliobla	Dnase	171237	273378	0.626374	101525	1580.43	44.1093	1.68664	0	0	Null_Model_OpenChrom	human
Roadmapepigenomics_ActiveChromatin	IMR90	ActiveChromatin	185987	273378	0.680329	118820	1522.75	44.109	1.56528	0	0	Null_Model_OpenChrom	human
Roadmapepigenomics_Histone_narrow	Fetal_Heart	H3K4me1	169277	273378	0.619205	103179	1498.56	44.108	1.64062	0	0	Null_Model_OpenChrom	human
DNaseClusters	WI-38+4OHTAM_20nM_72hr	Dnase	177319	273378	0.648622	109385	1540.21	44.1069	1.62105	0	0	Null_Model_OpenChrom	human
DNaseI_Duke	Fibrobl_GM03348	Dnase	165000	273378	0.60356	98400.3	1509.99	44.1059	1.67682	0	0	Null_Model_OpenChrom	human
Roadmapepigenomics_ActiveChromatin	H9_Derived_Neuron	ActiveChromatin	160713	273378	0.587878	93231.6	1529.99	44.1057	1.7238	0	0	Null_Model_OpenChrom	human
Roadmapepigenomics_Histone_narrow	H1_Derived_Mesenchymal_Stem_Cells	H4K91ac	174994	273378	0.640117	107817	1523.17	44.1037	1.62307	0	0	Null_Model_OpenChrom	human
DNaseI_Duke	HSMM_emb	Dnase	168187	273378	0.615218	100316	1538.93	44.103	1.67658	0	0	Null_Model_OpenChrom	human
Roadmapepigenomics_Histone_narrow	Brain_Mid_Frontal_Lobe	H3K4me1	176717	273378	0.64642	106712	1587.31	44.1028	1.65601	0	0	Null_Model_OpenChrom	human
Roadmapepigenomics_Histone_narrow	NHEK-Epidermal_Keratinocytes	H3K4me1	173064	273378	0.633058	106877	1500.76	44.1025	1.61929	0	0	Null_Model_OpenChrom	human
DNaseClusters	HPAF	Dnase	177458	273378	0.649131	108978	1552.79	44.101	1.62838	0	0	Null_Model_OpenChrom	human
Roadmapepigenomics_ActiveChromatin	H1_BMP4_Derived_Trophoblast	ActiveChromatin	173050	273378	0.633006	106795	1502.38	44.1004	1.6204	0	0	Null_Model_OpenChrom	human
Roadmapepigenomics_Histone_narrow	IMR90_Cell_Line	H2AK5ac	152478	273378	0.557755	87797.4	1466.7	44.0994	1.7367	0	0	Null_Model_OpenChrom	human
Roadmapepigenomics_Histone_narrow	H9_Cell_Line	H2BK12ac	73991	273378	0.270655	30049	996.433	44.0993	2.46235	0	0	Null_Model_OpenChrom	human
Roadmapepigenomics_Histone_narrow	H9_Cell_Line	H3K14ac	166973	273378	0.610777	99681	1525.94	44.0988	1.67507	0	0	Null_Model_OpenChrom	human
DNaseI_Duke	Fibrobl_GM03348+lenti-MyoD	Dnase	166670	273378	0.609669	99680.5	1519.09	44.0985	1.67204	0	0	Null_Model_OpenChrom	human
DNaseClusters	HCM	Dnase	178132	273378	0.651596	111080	1520.58	44.0961	1.60363	0	0	Null_Model_OpenChrom	human
DNaseClusters	HMF	Dnase	170010	273378	0.621886	102048	1541.23	44.0958	1.66598	0	0	Null_Model_OpenChrom	human
Roadmapepigenomics_ActiveChromatin	Adipose_Nuclei	7_Enh	148890	273378	0.544631	84575.4	1458.53	44.0956	1.76044	0	0	Null_Model_OpenChrom	human
Roadmapepigenomics_ActiveChromatin	Fetal_Intestine_Large	7_Enh	122641	273378	0.448613	64488.3	1318.83	44.0943	1.90176	0	0	Null_Model_OpenChrom	human
Roadmapepigenomics_ActiveChromatin	HUES64	ActiveChromatin	167774	273378	0.613707	101840	1495.35	44.0927	1.64743	0	0	Null_Model_OpenChrom	human
Roadmapepigenomics_ActiveChromatin	hESC_Derived_CD56+_Ectoderm	ActiveChromatin	161959	273378	0.592436	97286.9	1466.74	44.0924	1.66476	0	0	Null_Model_OpenChrom	human
Roadmapepigenomics_ActiveChromatin	HMEC_Mammary_Epithelial	ActiveChromatin	172433	273378	0.630749	106903	1486.2	44.0923	1.61298	0	0	Null_Model_OpenChrom	human
Roadmapepigenomics_ActiveChromatin	hESC_Derived_CD56+_Mesoderm	ActiveChromatin	166155	273378	0.607785	98991.4	1523.26	44.0919	1.67848	0	0	Null_Model_OpenChrom	human
Roadmapepigenomics_ActiveChromatin	Brain_Substantia_Nigra	7_Enh	129313	273378	0.473019	70889.7	1325.04	44.0917	1.82414	0	0	Null_Model_OpenChrom	human
DNaseClusters	HAEpiC	Dnase	176936	273378	0.647221	109790	1522.92	44.0902	1.61158	0	0	Null_Model_OpenChrom	human
Roadmapepigenomics_ActiveChromatin	Ovary	ActiveChromatin	153526	273378	0.561589	89334	1455.95	44.0895	1.71856	0	0	Null_Model_OpenChrom	human
DNaseClusters	NT2-D1	Dnase	168827	273378	0.617559	102513	1504.09	44.0892	1.64689	0	0	Null_Model_OpenChrom	human
Roadmapepigenomics_ActiveChromatin	Breast_vHMEC	ActiveChromatin	173164	273378	0.633423	105701	1530.15	44.0891	1.63824	0	0	Null_Model_OpenChrom	human
Roadmapepigenomics_Dnase_narrow	Ovary	Dnase	202515	273378	0.740787	133049	1575.61	44.0887	1.52211	0	0	Null_Model_OpenChrom	human
Roadmapepigenomics_Histone_narrow	H9_Derived_Neuronal_Progenitor_Cultured_Cells	H3K4me1	171269	273378	0.626492	104113	1523.21	44.0884	1.64503	0	0	Null_Model_OpenChrom	human
Roadmapepigenomics_Histone_narrow	H9_Cell_Line	H3K27ac	140283	273378	0.513147	80002.8	1367.29	44.0873	1.75348	0	0	Null_Model_OpenChrom	human
Roadmapepigenomics_Histone_narrow	Ovary	H3K27ac	134581	273378	0.492289	73652.2	1382.01	44.0872	1.82725	0	0	Null_Model_OpenChrom	human
Roadmapepigenomics_ActiveChromatin	Fetal_Brain_Male	ActiveChromatin	153166	273378	0.560272	88804.7	1459.88	44.0866	1.72475	0	0	Null_Model_OpenChrom	human
DNaseI_Duke	iPS_CWRU1	Dnase	168900	273378	0.617826	103802	1476.63	44.0858	1.62714	0	0	Null_Model_OpenChrom	human
Roadmapepigenomics_ActiveChromatin	iPS-18	ActiveChromatin	166837	273378	0.61028	101472	1482.69	44.0857	1.64417	0	0	Null_Model_OpenChrom	human
Roadmapepigenomics_ActiveChromatin	HUES48	ActiveChromatin	167262	273378	0.611834	100979	1503.51	44.0856	1.6564	0	0	Null_Model_OpenChrom	human
Roadmapepigenomics_Histone_narrow	Fetal_Brain_Female	H3K4me1	145534	273378	0.532354	82086.4	1439.21	44.085	1.77294	0	0	Null_Model_OpenChrom	human
Roadmapepigenomics_ActiveChromatin	ES-I3	ActiveChromatin	181695	273378	0.664629	114287	1529.05	44.0848	1.58981	0	0	Null_Model_OpenChrom	human
DNaseI_Duke	Cerebrum_frontal_OC	Dnase	172633	273378	0.631481	104723	1540.46	44.0841	1.64847	0	0	Null_Model_OpenChrom	human
Roadmapepigenomics_Histone_narrow	Fetal_Muscle_Leg	H3K4me1	194567	273378	0.711714	127358	1524.65	44.0819	1.52772	0	0	Null_Model_OpenChrom	human
DNaseClusters	SAEC	Dnase	173236	273378	0.633687	106056	1524.01	44.0809	1.63343	0	0	Null_Model_OpenChrom	human
BroadChromHMM	HUVEC	WeakEnhancer	133167	273378	0.487117	72030	1386.93	44.0809	1.84877	0	0	Null_Model_OpenChrom	human
DNaseClusters	HCPEpiC	Dnase	181143	273378	0.66261	113825	1527.15	44.0807	1.59141	0	0	Null_Model_OpenChrom	human
DNaseClusters	HCFaa	Dnase	164446	273378	0.601533	99682.9	1469.35	44.0761	1.64969	0	0	Null_Model_OpenChrom	human
Roadmapepigenomics_Histone_narrow	Penis_Foreskin_Melanocyte_Primary_Cells_skin03	H3K4me1	183343	273378	0.670657	115538	1538.37	44.0757	1.58686	0	0	Null_Model_OpenChrom	human
Roadmapepigenomics_Histone_narrow	Fetal_Adrenal_Gland	H3K4me1	194975	273378	0.713207	126914	1544.21	44.075	1.53627	0	0	Null_Model_OpenChrom	human
Roadmapepigenomics_ActiveChromatin	Fetal_Heart	7_Enh	156759	273378	0.573415	93204.5	1441.99	44.0741	1.68188	0	0	Null_Model_OpenChrom	human
Roadmapepigenomics_Histone_narrow	Penis_Foreskin_Fibroblast_Primary_Cells_skin01	H3K27ac	185929	273378	0.680117	118586	1527.97	44.0735	1.56789	0	0	Null_Model_OpenChrom	human
Roadmapepigenomics_Histone_narrow	H9_Cell_Line	H3K4ac	113913	273378	0.416687	57674.1	1276.03	44.0734	1.97511	0	0	Null_Model_OpenChrom	human
Roadmapepigenomics_Histone_narrow	Psoas_Muscle	H3K4me1	141606	273378	0.517986	78949.7	1421.65	44.0731	1.79362	0	0	Null_Model_OpenChrom	human
DNaseClusters	HEEpiC	Dnase	175719	273378	0.642769	110462	1480.67	44.073	1.59077	0	0	Null_Model_OpenChrom	human
Roadmapepigenomics_Histone_narrow	NH-A_Astrocytes	H3K4me2	164930	273378	0.603304	99062.6	1494.64	44.069	1.66491	0	0	Null_Model_OpenChrom	human
Roadmapepigenomics_Histone_narrow	H1_Cell_Line	H3K4ac	55136	273378	0.201684	20696.1	781.51	44.0685	2.66408	0	0	Null_Model_OpenChrom	human
Roadmapepigenomics_Histone_narrow	Fetal_Kidney	H3K4me1	106515	273378	0.389625	52895.7	1216.74	44.0682	2.01368	0	0	Null_Model_OpenChrom	human
Roadmapepigenomics_Histone_narrow	hESC_Derived_CD56+_Mesoderm_Cultured_Cells	H3K27ac	140577	273378	0.514222	80061	1373.28	44.0667	1.75587	0	0	Null_Model_OpenChrom	human
DNaseClusters	NHDF-neo	Dnase	168592	273378	0.616699	103905	1467.94	44.0661	1.62255	0	0	Null_Model_OpenChrom	human
Roadmapepigenomics_ActiveChromatin	Neurosphere_Cortex_Derived	ActiveChromatin	167721	273378	0.613513	101737	1497.4	44.0658	1.64858	0	0	Null_Model_OpenChrom	human
Roadmapepigenomics_ActiveChromatin	Bone_Marrow_Derived_Mesenchymal_Stem_Cell	ActiveChromatin	171883	273378	0.628737	106429	1485.38	44.0653	1.615	0	0	Null_Model_OpenChrom	human
DNaseI_Duke	FibroP_AG20443	Dnase	167747	273378	0.613608	101989	1492.3	44.0649	1.64476	0	0	Null_Model_OpenChrom	human
Roadmapepigenomics_ActiveChromatin	NH-A_Astrocytes	ActiveChromatin	168350	273378	0.615814	102683	1490.24	44.0647	1.63951	0	0	Null_Model_OpenChrom	human
Roadmapepigenomics_Histone_narrow	Placenta_Amnion	H3K4me1	162036	273378	0.592718	96821.7	1480	44.0637	1.67355	0	0	Null_Model_OpenChrom	human
DNaseClusters	Huh-7.5	Dnase	171960	273378	0.629019	107812	1455.84	44.0622	1.59499	0	0	Null_Model_OpenChrom	human
Roadmapepigenomics_Histone_narrow	H1_Derived_Mesenchymal_Stem_Cells	H3K23ac	167874	273378	0.614073	102272	1488.85	44.0619	1.64144	0	0	Null_Model_OpenChrom	human
Roadmapepigenomics_Histone_narrow	Fetal_Brain_Male	H3K4me1	153895	273378	0.562938	92392.7	1395.84	44.0612	1.66566	0	0	Null_Model_OpenChrom	human
Roadmapepigenomics_ActiveChromatin	Fetal_Lung	ActiveChromatin	171604	273378	0.627717	106220	1483.94	44.0607	1.61555	0	0	Null_Model_OpenChrom	human
Roadmapepigenomics_ActiveChromatin	Muscle_Satellite	ActiveChromatin	174552	273378	0.638501	109896	1467.51	44.0579	1.58833	0	0	Null_Model_OpenChrom	human
DNaseI_Duke	H1-hESC	Dnase	163704	273378	0.598819	99559.3	1455.92	44.0578	1.64429	0	0	Null_Model_OpenChrom	human
DNaseI_Duke	ProgFib	Dnase	162622	273378	0.594861	98189.2	1462.59	44.054	1.65621	0	0	Null_Model_OpenChrom	human
Roadmapepigenomics_ActiveChromatin	Penis_Foreskin_Keratinocyte_Primary_skin02	ActiveChromatin	178383	273378	0.652514	112949	1485.33	44.0533	1.57932	0	0	Null_Model_OpenChrom	human
DNaseClusters	HAc	Dnase	169383	273378	0.619593	104175	1480.23	44.0524	1.62594	0	0	Null_Model_OpenChrom	human
DNaseI_Duke	Fibrobl_GM03348+lenti-control	Dnase	163630	273378	0.598549	98334.9	1482.24	44.0517	1.66401	0	0	Null_Model_OpenChrom	human
Roadmapepigenomics_ActiveChromatin	Osteoblasts	ActiveChromatin	174982	273378	0.640073	109827	1479.09	44.0508	1.59325	0	0	Null_Model_OpenChrom	human
DNaseI_Duke	Medullo_D341	Dnase	169919	273378	0.621553	105335	1466.21	44.0485	1.61314	0	0	Null_Model_OpenChrom	human
Roadmapepigenomics_Dnase_narrow	Fetal_Placenta	Dnase	215095	273378	0.786804	150297	1471.11	44.0474	1.43114	0	0	Null_Model_OpenChrom	human
DNaseClusters	HFF	Dnase	177154	273378	0.648018	110979	1502.4	44.0464	1.59628	0	0	Null_Model_OpenChrom	human
Roadmapepigenomics_Histone_narrow	H1_BMP4_Derived_Mesendoderm_Cultured_Cells	H3K23ac	102830	273378	0.376146	50739.5	1182.63	44.0463	2.02663	0	0	Null_Model_OpenChrom	human
Roadmapepigenomics_Histone_narrow	H1_Derived_Mesenchymal_Stem_Cells	H2BK12ac	163702	273378	0.598812	99415.4	1459.54	44.0459	1.64665	0	0	Null_Model_OpenChrom	human
DNaseI_Duke	Huh-7.5	Dnase	168975	273378	0.6181	103928	1476.89	44.043	1.62588	0	0	Null_Model_OpenChrom	human
DNaseI_Duke	FibroP	Dnase	168602	273378	0.616736	103608	1475.75	44.0414	1.62731	0	0	Null_Model_OpenChrom	human
Roadmapepigenomics_Dnase_narrow	Penis_Foreskin_Melanocyte_Primary_Cells_skin01	Dnase	185923	273378	0.680095	120144	1493.69	44.0379	1.5475	0	0	Null_Model_OpenChrom	human
Roadmapepigenomics_ActiveChromatin	Penis_Foreskin_Keratinocyte_Primary_skin03	ActiveChromatin	180158	273378	0.659007	115124	1476.8	44.0369	1.5649	0	0	Null_Model_OpenChrom	human
Roadmapepigenomics_Histone_narrow	H1_Derived_Neuronal_Progenitor_Cultured_Cells	H3K23ac	174350	273378	0.637762	110023	1460.77	44.0363	1.58466	0	0	Null_Model_OpenChrom	human
Roadmapepigenomics_Histone_narrow	H1_Derived_Mesenchymal_Stem_Cells	H2BK5ac	123379	273378	0.451313	66886	1282.89	44.0357	1.84461	0	0	Null_Model_OpenChrom	human
Roadmapepigenomics_Histone_narrow	H9_Derived_Neuron_Cultured_Cells	H3K4me1	166756	273378	0.609983	103370	1439.45	44.0348	1.61319	0	0	Null_Model_OpenChrom	human
Roadmapepigenomics_ActiveChromatin	Duodenum_Smooth_Muscle	7_Enh	109908	273378	0.402037	57198.4	1197.09	44.0316	1.92152	0	0	Null_Model_OpenChrom	human
DNaseI_Duke	FibroP_AG08396	Dnase	169085	273378	0.618503	103508	1489.34	44.0306	1.63354	0	0	Null_Model_OpenChrom	human
Roadmapepigenomics_ActiveChromatin	Breast_Myoepithelial	ActiveChromatin	177206	273378	0.648209	112855	1461.55	44.0293	1.57021	0	0	Null_Model_OpenChrom	human
Roadmapepigenomics_ActiveChromatin	HUES6	ActiveChromatin	181399	273378	0.663546	116858	1465.92	44.0274	1.5523	0	0	Null_Model_OpenChrom	human
eQTLs	LCLs	none	60877	273378	0.222684	24718.9	821.27	44.0271	2.46277	0	0	Null_Model_OpenChrom	human
Roadmapepigenomics_Histone_narrow	H1_Cell_Line	H3K79me2	83177	273378	0.304256	38537.9	1013.9	44.027	2.15832	0	0	Null_Model_OpenChrom	human
DNaseI_Duke	LNCap	Dnase	164563	273378	0.601961	101439	1433.76	44.0269	1.62229	0	0	Null_Model_OpenChrom	human
DNaseI_Duke	PanIsletD	Dnase	169535	273378	0.620149	105120	1463.08	44.0267	1.61277	0	0	Null_Model_OpenChrom	human
Roadmapepigenomics_Histone_narrow	H9_Cell_Line	H4K5ac	119036	273378	0.435426	64400	1241.01	44.0253	1.84838	0	0	Null_Model_OpenChrom	human
Roadmapepigenomics_Histone_narrow	hESC_Derived_CD56+_Ectoderm_Cultured_Cells	H3K27ac	135579	273378	0.49594	76060.1	1351.93	44.025	1.78252	0	0	Null_Model_OpenChrom	human
Roadmapepigenomics_ActiveChromatin	CD4+_CD25-_IL17-_PMA-Ionomycin_stimulated_MACS_purified_Th_Primary	3_TxFlnk	20647	273378	0.0755255	4324.9	370.75	44.0245	4.77398	0	0	Null_Model_OpenChrom	human
Roadmapepigenomics_Dnase_narrow	H1_BMP4_Derived_Trophoblast_Cultured_Cells	Dnase	174668	273378	0.638925	109963	1469.79	44.0232	1.58843	0	0	Null_Model_OpenChrom	human
FANTOM5_enhancer_organ	thymus_expressed_enhancers	Enhancer	13630	273378	0.0498577	2180.33	260.099	44.0204	6.25135	0	0	Null_Model_OpenChrom	human
BroadChromHMM	HepG2	WeakEnhancer	125861	273378	0.460392	70163.2	1265.27	44.0204	1.79383	0	0	Null_Model_OpenChrom	human
DNaseI_Duke	iPS_NIHi7	Dnase	166781	273378	0.610075	103275	1442.7	44.0188	1.61492	0	0	Null_Model_OpenChrom	human
DNaseI_Duke	LNCap+androgen	Dnase	167649	273378	0.61325	104080	1444.18	44.0178	1.61078	0	0	Null_Model_OpenChrom	human
Roadmapepigenomics_Histone_narrow	H1_BMP4_Derived_Trophoblast_Cultured_Cells	H2BK12ac	149949	273378	0.548504	89108.5	1382.19	44.0174	1.68277	0	0	Null_Model_OpenChrom	human
Roadmapepigenomics_ActiveChromatin	Penis_Foreskin_Fibroblast_Primary_skin01	ActiveChromatin	188171	273378	0.688318	123938	1459.27	44.0172	1.51827	0	0	Null_Model_OpenChrom	human
Roadmapepigenomics_ActiveChromatin	4star	ActiveChromatin	174234	273378	0.637337	109210	1477.28	44.0164	1.59541	0	0	Null_Model_OpenChrom	human
DNaseI_Duke	Psoas_muscle_OC	Dnase	166309	273378	0.608348	102970	1439.01	44.0158	1.61512	0	0	Null_Model_OpenChrom	human
DNaseI_Duke	H9ES	Dnase	166557	273378	0.609255	103093	1441.85	44.0156	1.6156	0	0	Null_Model_OpenChrom	human
FANTOM5_enhancer_cell	T_cell	Enhancer	22948	273378	0.0839424	5140.77	404.57	44.0152	4.46392	0	0	Null_Model_OpenChrom	human
DNaseClusters	HNPCEpiC	Dnase	175589	273378	0.642294	112510	1433.12	44.0149	1.56065	0	0	Null_Model_OpenChrom	human
DNaseI_Duke	NHEK	Dnase	169507	273378	0.620046	105560	1452.91	44.0133	1.60579	0	0	Null_Model_OpenChrom	human
Roadmapepigenomics_Dnase_narrow	H1_Derived_Mesenchymal_Stem_Cells	Dnase	191726	273378	0.701322	127649	1455.87	44.0131	1.50198	0	0	Null_Model_OpenChrom	human
DNaseI_Duke	HSMM	Dnase	169322	273378	0.61937	105564	1448.67	44.0116	1.60398	0	0	Null_Model_OpenChrom	human
EBV_Enhancers	LCLs	EnhancersT2	10936	273378	0.0400032	1415.06	216.33	44.0113	7.72832	0	0	Null_Model_OpenChrom	human
DNaseClusters	MCF-7	Dnase	173922	273378	0.636196	110283	1445.96	44.0113	1.57705	0	0	Null_Model_OpenChrom	human
Roadmapepigenomics_ActiveChromatin	Brain_Germinal_Matrix	10_TssBiv	47225	273378	0.172746	16128.3	706.578	44.0103	2.92809	0	0	Null_Model_OpenChrom	human
DNaseClusters	HIPEpiC	Dnase	179658	273378	0.657178	115564	1456.37	44.0094	1.55462	0	0	Null_Model_OpenChrom	human
Roadmapepigenomics_Histone_narrow	A549_EtOH_0.02pct_Lung_Carcinoma	H3K4me1	162423	273378	0.594133	99167.6	1437.32	44.0093	1.63786	0	0	Null_Model_OpenChrom	human
DNaseClusters	Hepatocytes	Dnase	155098	273378	0.567339	93890.6	1390.79	44.009	1.6519	0	0	Null_Model_OpenChrom	human
Roadmapepigenomics_Dnase_narrow	Fetal_Muscle_Leg	Dnase	210764	273378	0.770962	147291	1442.32	44.0076	1.43094	0	0	Null_Model_OpenChrom	human
Roadmapepigenomics_Histone_narrow	Lung	H3K4me1	190905	273378	0.698319	128627	1415.22	44.0062	1.48418	0	0	Null_Model_OpenChrom	human
Roadmapepigenomics_ActiveChromatin	NHDF-Ad_Adult_Dermal_Fibroblasts	ActiveChromatin	170997	273378	0.625497	105824	1480.99	44.0062	1.61586	0	0	Null_Model_OpenChrom	human
DNaseClusters	SKMC	Dnase	174238	273378	0.637352	110450	1449.53	44.0061	1.57753	0	0	Null_Model_OpenChrom	human
Roadmapepigenomics_ActiveChromatin	Colon_Smooth_Muscle	7_Enh	126424	273378	0.462451	70943.7	1260.77	44.0052	1.78203	0	0	Null_Model_OpenChrom	human
Roadmapepigenomics_Histone_narrow	NHLF_Lung_Fibroblasts	H3K4me1	135304	273378	0.494934	77553	1312.41	44.0038	1.74467	0	0	Null_Model_OpenChrom	human
Roadmapepigenomics_Histone_narrow	Left_Ventricle	H3K4me1	165330	273378	0.604767	103673	1401.2	44.0034	1.59473	0	0	Null_Model_OpenChrom	human
Roadmapepigenomics_Dnase_narrow	Fetal_Muscle_Trunk	Dnase	211072	273378	0.772088	146812	1460.38	44.002	1.4377	0	0	Null_Model_OpenChrom	human
DNaseI_Duke	iSP_NIHi11	Dnase	168705	273378	0.617113	106189	1420.95	43.9961	1.58872	0	0	Null_Model_OpenChrom	human
Roadmapepigenomics_Histone_narrow	H1_Derived_Neuronal_Progenitor_Cultured_Cells	H3K79me1	134827	273378	0.493189	78864	1272.03	43.995	1.70961	0	0	Null_Model_OpenChrom	human
DNaseClusters	NH-A	Dnase	168389	273378	0.615957	106595	1404.58	43.9946	1.57971	0	0	Null_Model_OpenChrom	human
BroadChromHMM	H1-hESC	WeakEnhancer	153836	273378	0.562723	93640.8	1368.29	43.9931	1.64283	0	0	Null_Model_OpenChrom	human
SuperEnhancers_Hnisz2013	CD56	SuperEnhancer	26997	273378	0.0987534	6945.89	455.781	43.9929	3.88676	0	0	Null_Model_OpenChrom	human
Roadmapepigenomics_Histone_narrow	Dnd41_TCell_Leukemia	H3K36me3	108425	273378	0.396612	55399.9	1205.36	43.9912	1.95713	0	0	Null_Model_OpenChrom	human
Roadmapepigenomics_Dnase_narrow	Breast_vHMEC	Dnase	180718	273378	0.661055	118327	1418.27	43.9908	1.52727	0	0	Null_Model_OpenChrom	human
DNaseI_Duke	HSMM_FSHD	Dnase	172227	273378	0.629996	109791	1419.36	43.9886	1.56868	0	0	Null_Model_OpenChrom	human
EBV_Enhancers	LCLs_Tier2	none	10936	273378	0.0400032	1415.31	216.436	43.9884	7.72693	0	0	Null_Model_OpenChrom	human
DNaseI_Duke	IMR90	Dnase	173402	273378	0.634294	110066	1439.86	43.9878	1.57544	0	0	Null_Model_OpenChrom	human
Roadmapepigenomics_Dnase_narrow	A549_EtOH_0.02pct_Lung_Carcinoma	Dnase	191352	273378	0.699954	129031	1416.79	43.9876	1.48299	0	0	Null_Model_OpenChrom	human
Roadmapepigenomics_Histone_narrow	H1_Cell_Line	H2A.Z	157138	273378	0.574801	96553.9	1377.37	43.9852	1.62746	0	0	Null_Model_OpenChrom	human
Roadmapepigenomics_Histone_narrow	H1_Cell_Line	H3K14ac	55137	273378	0.201688	20879.8	778.836	43.9851	2.64068	0	0	Null_Model_OpenChrom	human
Roadmapepigenomics_ActiveChromatin	Chondrocytes_from_Bone_Marrow_Derived_Mesenchymal_Stem_Cell	ActiveChromatin	181742	273378	0.664801	118877	1429.26	43.9846	1.52883	0	0	Null_Model_OpenChrom	human
Roadmapepigenomics_ActiveChromatin	hESC_Derived_CD184+_Endoderm	ActiveChromatin	160582	273378	0.587399	98906.1	1402.23	43.9842	1.62358	0	0	Null_Model_OpenChrom	human
Roadmapepigenomics_Histone_narrow	HMEC_Mammary_Epithelial	H3K4me1	161708	273378	0.591518	100252	1397.23	43.9839	1.61301	0	0	Null_Model_OpenChrom	human
DNaseClusters	Myometr	Dnase	164940	273378	0.60334	102535	1418.85	43.9831	1.60863	0	0	Null_Model_OpenChrom	human
DNaseClusters	PanIslets	Dnase	173906	273378	0.636138	112680	1392.05	43.9827	1.54336	0	0	Null_Model_OpenChrom	human
Roadmapepigenomics_ActiveChromatin	Fetal_Brain_Male	7_Enh	124199	273378	0.454312	68398.2	1268.73	43.9815	1.81582	0	0	Null_Model_OpenChrom	human
Roadmapepigenomics_ActiveChromatin	Mesenchymal_Stem_Cell_Derived_Adipocyte	ActiveChromatin	179445	273378	0.656399	118920	1376.23	43.9788	1.50896	0	0	Null_Model_OpenChrom	human
Roadmapepigenomics_Dnase_narrow	HMEC_Mammary_Epithelial	Dnase	181565	273378	0.664154	119548	1410.18	43.9782	1.51877	0	0	Null_Model_OpenChrom	human
DNaseClusters	Urothelia+UT189	Dnase	170104	273378	0.62223	106700	1441.75	43.9772	1.59423	0	0	Null_Model_OpenChrom	human
Roadmapepigenomics_ActiveChromatin	iPS_DF_19.11	ActiveChromatin	183480	273378	0.671159	119541	1453.92	43.977	1.53487	0	0	Null_Model_OpenChrom	human
Roadmapepigenomics_Dnase_narrow	Fetal_Adrenal_Gland	Dnase	201382	273378	0.736643	139142	1415.34	43.9753	1.44731	0	0	Null_Model_OpenChrom	human
DNaseI_Duke	8988T	Dnase	163553	273378	0.598267	102624	1385.54	43.9747	1.59371	0	0	Null_Model_OpenChrom	human
BroadChromHMM	K562	WeakEnhancer	128140	273378	0.468728	72219.7	1271.76	43.9709	1.77431	0	0	Null_Model_OpenChrom	human
SuperEnhancers_Hnisz2013	BI_CD4_Memory_Primary_7pool	SuperEnhancer	30795	273378	0.112646	8696.47	502.601	43.9683	3.54109	0	0	Null_Model_OpenChrom	human
Roadmapepigenomics_Histone_narrow	IMR90_Cell_Line	H2BK120ac	123550	273378	0.451938	69055.1	1239.45	43.967	1.78915	0	0	Null_Model_OpenChrom	human
DNaseClusters	AG09309	Dnase	171988	273378	0.629122	109888	1412.44	43.9665	1.56512	0	0	Null_Model_OpenChrom	human
DNaseI_Duke	pHTC	Dnase	172528	273378	0.631097	110366	1413.85	43.9663	1.56323	0	0	Null_Model_OpenChrom	human
DNaseClusters	NHEK	Dnase	177490	273378	0.649248	114720	1427.74	43.9644	1.54716	0	0	Null_Model_OpenChrom	human
Roadmapepigenomics_ActiveChromatin	Fetal_Intestine_Small	7_Enh	112002	273378	0.409696	60516.5	1171.17	43.9609	1.85077	0	0	Null_Model_OpenChrom	human
Roadmapepigenomics_Histone_narrow	Fetal_Muscle_Trunk	H3K4me1	193180	273378	0.706641	131081	1412.63	43.9594	1.47374	0	0	Null_Model_OpenChrom	human
DNaseI_Duke	Medullo	Dnase	157688	273378	0.576813	97924.8	1359.63	43.9554	1.6103	0	0	Null_Model_OpenChrom	human
Roadmapepigenomics_Histone_narrow	hESC_Derived_CD184+_Endoderm_Cultured_Cells	H3K27ac	137747	273378	0.50387	81471.1	1280.38	43.9527	1.69075	0	0	Null_Model_OpenChrom	human
Roadmapepigenomics_Histone_narrow	Penis_Foreskin_Fibroblast_Primary_Cells_skin02	H3K4me1	193547	273378	0.707983	133363	1369.34	43.9509	1.45128	0	0	Null_Model_OpenChrom	human
DNaseClusters	HRPEpiC	Dnase	173049	273378	0.633003	113111	1363.77	43.9502	1.5299	0	0	Null_Model_OpenChrom	human
Roadmapepigenomics_Histone_narrow	Right_Atrium	H3K36me3	172453	273378	0.630823	112823	1356.81	43.9485	1.52852	0	0	Null_Model_OpenChrom	human
Roadmapepigenomics_ActiveChromatin	Brain_Cingulate_Gyrus	7_Enh	119770	273378	0.438111	68127	1175.12	43.9471	1.75804	0	0	Null_Model_OpenChrom	human
DNaseI_Duke	HeLa-S3+INFa4h	Dnase	166781	273378	0.610075	107166	1356.62	43.944	1.55629	0	0	Null_Model_OpenChrom	human
DNaseI_Duke	H7-hESC	Dnase	170475	273378	0.623587	109364	1390.68	43.9434	1.55879	0	0	Null_Model_OpenChrom	human
Enhancers_Hnisz2013	panc1	Enhancer	61814	273378	0.226112	25660.5	822.743	43.9427	2.40892	0	0	Null_Model_OpenChrom	human
Roadmapepigenomics_Histone_narrow	Muscle_Satellite_Cultured_Cells	H3K4me1	177616	273378	0.649708	117036	1378.67	43.9406	1.51762	0	0	Null_Model_OpenChrom	human
DNaseI_Duke	Osteobl	Dnase	167282	273378	0.611907	105107	1415.11	43.9367	1.59154	0	0	Null_Model_OpenChrom	human
DNaseClusters	HA-h	Dnase	174689	273378	0.639002	114192	1377.01	43.9336	1.52978	0	0	Null_Model_OpenChrom	human
DNaseClusters	HBMEC	Dnase	172210	273378	0.629934	110164	1412.32	43.9323	1.56322	0	0	Null_Model_OpenChrom	human
Enhancers_Hnisz2013	BI_Duodenum_Smooth_Muscle	Enhancer	85363	273378	0.312253	41266	1003.77	43.9313	2.06861	0	0	Null_Model_OpenChrom	human
Roadmapepigenomics_Histone_narrow	Pancreas	H3K4me1	182961	273378	0.66926	122607	1373.83	43.9311	1.49225	0	0	Null_Model_OpenChrom	human
DNaseI_Duke	T-47D+Estradiol_10nM_30m	Dnase	182532	273378	0.667691	122238	1372.52	43.9293	1.49325	0	0	Null_Model_OpenChrom	human
Roadmapepigenomics_Histone_narrow	Right_Ventricle	H3K4me1	184796	273378	0.675972	124300	1377.15	43.9285	1.4867	0	0	Null_Model_OpenChrom	human
Roadmapepigenomics_Histone_narrow	Osteoblasts	H3K4me1	178232	273378	0.651962	117214	1389.06	43.9278	1.52057	0	0	Null_Model_OpenChrom	human
FANTOM5_enhancer_organ	tonsil_expressed_enhancers	Enhancer	10738	273378	0.0392789	1558.69	208.969	43.9267	6.88913	0	0	Null_Model_OpenChrom	human
DNaseI_Duke	Panislets	Dnase	166401	273378	0.608685	106874	1355.17	43.926	1.55699	0	0	Null_Model_OpenChrom	human
SuperEnhancers_Hnisz2013	MM1S	SuperEnhancer	18708	273378	0.0684327	4055.73	333.593	43.9225	4.61273	0	0	Null_Model_OpenChrom	human
Roadmapepigenomics_Histone_narrow	NH-A_Astrocytes	H4K20me1	100066	273378	0.366035	52473.5	1083.67	43.9178	1.90698	0	0	Null_Model_OpenChrom	human
DNaseClusters	NHDF-Ad	Dnase	179106	273378	0.655159	118502	1380.03	43.9154	1.51142	0	0	Null_Model_OpenChrom	human
DNaseI_Duke	HMEC	Dnase	171765	273378	0.628306	112356	1352.83	43.9145	1.52875	0	0	Null_Model_OpenChrom	human
Roadmapepigenomics_Histone_narrow	iPS_DF_6.9_Cell_Line	H3K27ac	87835	273378	0.321295	44281.7	991.812	43.9129	1.98355	0	0	Null_Model_OpenChrom	human
DNaseClusters	HA-sp	Dnase	161090	273378	0.589257	101563	1355.63	43.9114	1.58612	0	0	Null_Model_OpenChrom	human
Roadmapepigenomics_ActiveChromatin	Brain_Hippocampus_Middle	7_Enh	128532	273378	0.470162	74877	1221.93	43.9101	1.71658	0	0	Null_Model_OpenChrom	human
DNaseClusters	NHLF	Dnase	170579	273378	0.623968	111252	1351.14	43.9092	1.53327	0	0	Null_Model_OpenChrom	human
Roadmapepigenomics_Histone_narrow	Right_Atrium	H3K4me1	162768	273378	0.595395	104746	1321.45	43.9076	1.55393	0	0	Null_Model_OpenChrom	human
DNaseClusters	Chorion	Dnase	165950	273378	0.607035	108376	1311.27	43.9068	1.53124	0	0	Null_Model_OpenChrom	human
Roadmapepigenomics_Dnase_narrow	H1_Cell_Line	Dnase	191102	273378	0.699039	130657	1376.72	43.9051	1.46262	0	0	Null_Model_OpenChrom	human
DNaseClusters	PanIsletD	Dnase	182396	273378	0.667193	121350	1390.45	43.9039	1.50306	0	0	Null_Model_OpenChrom	human
Roadmapepigenomics_ActiveChromatin	Fetal_Adrenal_Gland	3_TxFlnk	13579	273378	0.0496712	2348.31	255.826	43.8997	5.78246	0	0	Null_Model_OpenChrom	human
Enhancers_Hnisz2013	RPMI-8402	Enhancer	40654	273378	0.14871	14081.3	605.325	43.8983	2.8871	0	0	Null_Model_OpenChrom	human
Roadmapepigenomics_Histone_narrow	Fetal_Stomach	H3K4me1	182384	273378	0.66715	123335	1345.14	43.8982	1.47877	0	0	Null_Model_OpenChrom	human
DNaseI_Duke	Myometr	Dnase	163662	273378	0.598666	104710	1343.06	43.894	1.56301	0	0	Null_Model_OpenChrom	human
Roadmapepigenomics_Histone_narrow	H9_Cell_Line	H2BK15ac	80546	273378	0.294632	38520.4	957.445	43.8935	2.091	0	0	Null_Model_OpenChrom	human
Roadmapepigenomics_Histone_narrow	NH-A_Astrocytes	H3K4me1	176742	273378	0.646511	117256	1355.35	43.89	1.50732	0	0	Null_Model_OpenChrom	human
BroadChromHMM	NHEK	StrongEnhancer	90397	273378	0.330667	45720.4	1017.96	43.8884	1.97717	0	0	Null_Model_OpenChrom	human
Roadmapepigenomics_Histone_narrow	Breast_vHMEC	H3K4me1	182491	273378	0.667541	122194	1374.01	43.8841	1.49346	0	0	Null_Model_OpenChrom	human
Roadmapepigenomics_Histone_narrow	Bone_Marrow_Derived_Mesenchymal_Stem_Cell_Cultured_Cells	H3K4me1	171284	273378	0.626546	112507	1339.38	43.8837	1.52243	0	0	Null_Model_OpenChrom	human
Roadmapepigenomics_Histone_narrow	Chondrocytes_from_Bone_Marrow_Derived_Mesenchymal_Stem_Cell_Cultured_Cells	H3K4me1	187921	273378	0.687404	129176	1338.72	43.8815	1.45477	0	0	Null_Model_OpenChrom	human
eQTLs_GTEx_Analysis_V6	Whole_Blood	none	98797	273378	0.361393	52289.6	1059.9	43.8792	1.88942	0	0	Null_Model_OpenChrom	human
eQTLs	MRCE	none	113705	273378	0.415926	64056.2	1131.5	43.8789	1.77508	0	0	Null_Model_OpenChrom	human
SuperEnhancers_Hnisz2013	UCSD_Thymus	SuperEnhancer	20851	273378	0.0762717	4772.39	366.467	43.8747	4.36909	0	0	Null_Model_OpenChrom	human
Roadmapepigenomics_Histone_narrow	Fetal_Thymus	H3K9me3	130350	273378	0.476812	78281.1	1186.78	43.8743	1.66515	0	0	Null_Model_OpenChrom	human
Roadmapepigenomics_Histone_narrow	Penis_Foreskin_Fibroblast_Primary_Cells_skin01	H3K4me1	194692	273378	0.712171	137417	1305.48	43.8725	1.41679	0	0	Null_Model_OpenChrom	human
Roadmapepigenomics_Dnase_narrow	Fetal_Heart	Dnase	201679	273378	0.737729	143028	1336.93	43.8699	1.41006	0	0	Null_Model_OpenChrom	human
Roadmapepigenomics_ActiveChromatin	A549_EtOH_0.02pct_Lung_Carcinoma	3_TxFlnk	24878	273378	0.0910022	6673.83	414.96	43.8697	3.7277	0	0	Null_Model_OpenChrom	human
Roadmapepigenomics_Histone_narrow	Fetal_Lung	H3K4me1	180018	273378	0.658495	121484	1334.44	43.864	1.48183	0	0	Null_Model_OpenChrom	human
Roadmapepigenomics_Dnase_narrow	Penis_Foreskin_Keratinocyte_Primary_Cells_skin02	Dnase	185955	273378	0.680212	128260	1315.33	43.8634	1.44983	0	0	Null_Model_OpenChrom	human
Roadmapepigenomics_ActiveChromatin	Breast_vHMEC	7_Enh	143014	273378	0.523136	88989.4	1231.8	43.8582	1.60709	0	0	Null_Model_OpenChrom	human
Roadmapepigenomics_Histone_narrow	Dnd41_TCell_Leukemia	H4K20me1	96233	273378	0.352014	50098.4	1052.09	43.8504	1.92088	0	0	Null_Model_OpenChrom	human
Roadmapepigenomics_Histone_narrow	Fetal_Heart	H3K9me3	51688	273378	0.189072	20839.3	703.543	43.8476	2.48031	0	0	Null_Model_OpenChrom	human
Roadmapepigenomics_Histone_narrow	Breast_Myoepithelial_Cells	H3K4me1	183719	273378	0.672033	126123	1313.57	43.847	1.45667	0	0	Null_Model_OpenChrom	human
Roadmapepigenomics_Histone_narrow	Penis_Foreskin_Keratinocyte_Primary_Cells_skin03	H3K4me1	187303	273378	0.685143	129105	1327.35	43.8455	1.45079	0	0	Null_Model_OpenChrom	human
Roadmapepigenomics_Dnase_narrow	NHEK-Epidermal_Keratinocytes	Dnase	196219	273378	0.717757	137796	1332.67	43.8387	1.42398	0	0	Null_Model_OpenChrom	human
DNaseI_Duke	iPS	Dnase	173078	273378	0.633109	114065	1346.15	43.8381	1.51736	0	0	Null_Model_OpenChrom	human
Roadmapepigenomics_Histone_narrow	HSMM_Skeletal_Muscle_Myoblasts	H3K4me1	150793	273378	0.551592	94987.3	1273.12	43.834	1.58751	0	0	Null_Model_OpenChrom	human
Roadmapepigenomics_Histone_narrow	H1_Derived_Neuronal_Progenitor_Cultured_Cells	H3K9ac	188289	273378	0.68875	130843	1310.56	43.8329	1.43904	0	0	Null_Model_OpenChrom	human
Roadmapepigenomics_Histone_narrow	HSMMtube_Skeletal_Muscle_Myotubes_Derived_from_HSMM	H3K4me1	168696	273378	0.61708	112814	1274.91	43.8317	1.49534	0	0	Null_Model_OpenChrom	human
Roadmapepigenomics_Dnase_narrow	H1_Derived_Neuronal_Progenitor_Cultured_Cells	Dnase	191069	273378	0.698919	133738	1308.06	43.8294	1.42868	0	0	Null_Model_OpenChrom	human
Roadmapepigenomics_ActiveChromatin	Brain_Angular_Gyrus	7_Enh	111353	273378	0.407322	63199.4	1098.69	43.8281	1.76193	0	0	Null_Model_OpenChrom	human
SuperEnhancers_Hnisz2013	BI_CD8_Memory_7pool	SuperEnhancer	20887	273378	0.0764034	5174.6	358.522	43.8255	4.03645	0	0	Null_Model_OpenChrom	human
DNaseI_Duke	Chorion	Dnase	161169	273378	0.589546	103620	1313.22	43.8229	1.55539	0	0	Null_Model_OpenChrom	human
Roadmapepigenomics_Histone_narrow	Esophagus	H3K4me1	174707	273378	0.639068	118632	1279.63	43.8213	1.47268	0	0	Null_Model_OpenChrom	human
Roadmapepigenomics_Histone_narrow	Brain_Germinal_Matrix	H3K27me3	108617	273378	0.397314	59506.3	1120.74	43.82	1.8253	0	0	Null_Model_OpenChrom	human
Roadmapepigenomics_ActiveChromatin	CD3_Primary_Peripheral_UW	3_TxFlnk	12838	273378	0.0469606	2333.42	239.757	43.8134	5.5018	0	0	Null_Model_OpenChrom	human
Roadmapepigenomics_Histone_narrow	H1_Derived_Neuronal_Progenitor_Cultured_Cells	H3K18ac	170271	273378	0.622841	114444	1274.35	43.8079	1.4878	0	0	Null_Model_OpenChrom	human
DNaseClusters	8988T	Dnase	172737	273378	0.631861	115378	1309.34	43.8074	1.49714	0	0	Null_Model_OpenChrom	human
Roadmapepigenomics_Histone_narrow	Penis_Foreskin_Melanocyte_Primary_Cells_skin01	H3K4me1	111001	273378	0.406035	61779.4	1123.61	43.8067	1.79673	0	0	Null_Model_OpenChrom	human
DNaseClusters	iPS	Dnase	180283	273378	0.659464	122531	1318.41	43.8044	1.47132	0	0	Null_Model_OpenChrom	human
SuperEnhancers_Hnisz2013	CD8_primary	SuperEnhancer	26668	273378	0.0975499	7595	435.435	43.8021	3.51126	0	0	Null_Model_OpenChrom	human
SuperEnhancers_Hnisz2013	BI_CD4p_CD25-_Il17p_PMAstim_Th17	SuperEnhancer	27626	273378	0.101054	8054.83	446.829	43.8002	3.42975	0	0	Null_Model_OpenChrom	human
Roadmapepigenomics_ActiveChromatin	CD19_Primary_Cord_BI	6_EnhG	28725	273378	0.105074	8700.26	457.297	43.7894	3.30162	0	0	Null_Model_OpenChrom	human
DNaseClusters	H7-hESC	Dnase	184660	273378	0.675475	128286	1287.48	43.7863	1.43944	0	0	Null_Model_OpenChrom	human
Enhancers_Hnisz2013	BI_Brain_Hippocampus_Middle	Enhancer	89768	273378	0.328366	47268.3	970.66	43.7844	1.89912	0	0	Null_Model_OpenChrom	human
Roadmapepigenomics_Histone_narrow	IMR90_Cell_Line	H3K4me1	180831	273378	0.661469	124431	1288.13	43.7843	1.45326	0	0	Null_Model_OpenChrom	human
Roadmapepigenomics_ActiveChromatin	Fetal_Lung	3_TxFlnk	12425	273378	0.0454499	2257.24	232.234	43.7824	5.5045	0	0	Null_Model_OpenChrom	human
EBV_Enhancers	LCLs_allmaxscore	none	8026	273378	0.0293586	1090.08	158.423	43.781	7.36279	0	0	Null_Model_OpenChrom	human
Roadmapepigenomics_Histone_narrow	H1_Cell_Line	H4K8ac	202700	273378	0.741464	146641	1280.48	43.7797	1.38229	0	0	Null_Model_OpenChrom	human
Roadmapepigenomics_Histone_narrow	Osteoblasts	H4K20me1	90690	273378	0.331738	47952.9	976.257	43.7765	1.89123	0	0	Null_Model_OpenChrom	human
Roadmapepigenomics_Histone_narrow	H1_Cell_Line	H3K4me1	151717	273378	0.554972	99156.5	1200.75	43.7732	1.53008	0	0	Null_Model_OpenChrom	human
FANTOM5_enhancer_organ	spleen_expressed_enhancers	Enhancer	14807	273378	0.0541631	3042.08	268.778	43.7719	4.86739	0	0	Null_Model_OpenChrom	human
Roadmapepigenomics_Histone_narrow	Gastric	H3K4me1	163269	273378	0.597228	109451	1229.56	43.7698	1.4917	0	0	Null_Model_OpenChrom	human
EBV_Enhancers	LCLs	SuperEnhancersAll	8026	273378	0.0293586	1091.57	158.433	43.769	7.35271	0	0	Null_Model_OpenChrom	human
Roadmapepigenomics_ActiveChromatin	Fetal_Muscle_Leg	3_TxFlnk	12481	273378	0.0456547	2223.96	234.346	43.7687	5.61206	0	0	Null_Model_OpenChrom	human
Roadmapepigenomics_ActiveChromatin	Brain_Dorsolateral_Prefrontal_Cortex	7_Enh	106719	273378	0.390372	60631.1	1053.01	43.7679	1.76014	0	0	Null_Model_OpenChrom	human
Roadmapepigenomics_Dnase_narrow	H1_BMP4_Derived_Mesendoderm_Cultured_Cells	Dnase	188977	273378	0.691266	133091	1277.01	43.7632	1.41991	0	0	Null_Model_OpenChrom	human
Roadmapepigenomics_ActiveChromatin	CD19_Primary_Cord_BI	3_TxFlnk	11605	273378	0.0424504	2012.87	219.192	43.7614	5.76539	0	0	Null_Model_OpenChrom	human
Roadmapepigenomics_ActiveChromatin	Adipose_Derived_Mesenchymal_Stem_Cell	ActiveChromatin	187850	273378	0.687144	131718	1282.97	43.7518	1.42615	0	0	Null_Model_OpenChrom	human
Roadmapepigenomics_Histone_narrow	iPS-18_Cell_Line	H3K4me1	152649	273378	0.558381	99719.9	1209.78	43.7511	1.53078	0	0	Null_Model_OpenChrom	human
Roadmapepigenomics_ActiveChromatin	CD56_Primary	6_EnhG	35555	273378	0.130058	12523.9	526.459	43.7472	2.83897	0	0	Null_Model_OpenChrom	human
DNaseClusters	ProgFib	Dnase	178624	273378	0.653396	124042	1247.84	43.7409	1.44003	0	0	Null_Model_OpenChrom	human
Roadmapepigenomics_Dnase_narrow	IMR90_Cell_Line	Dnase	201753	273378	0.738	146564	1261.89	43.7353	1.37655	0	0	Null_Model_OpenChrom	human
Roadmapepigenomics_ActiveChromatin	CD56_Primary	3_TxFlnk	9777	273378	0.0357637	1566.38	187.737	43.7348	6.24178	0	0	Null_Model_OpenChrom	human
DNaseI_Duke	Hepatocytes	Dnase	157548	273378	0.576301	103794	1229.19	43.7314	1.51789	0	0	Null_Model_OpenChrom	human
Roadmapepigenomics_Histone_narrow	H1_BMP4_Derived_Trophoblast_Cultured_Cells	H3K4me1	174593	273378	0.638651	121513	1213.85	43.7285	1.43682	0	0	Null_Model_OpenChrom	human
Roadmapepigenomics_Dnase_narrow	Fetal_Lung	Dnase	211988	273378	0.775439	158663	1219.47	43.7277	1.33609	0	0	Null_Model_OpenChrom	human
Roadmapepigenomics_Histone_narrow	Mesenchymal_Stem_Cell_Derived_Adipocyte_Cultured_Cells	H3K4me1	183044	273378	0.669564	129664	1220.73	43.7274	1.41168	0	0	Null_Model_OpenChrom	human
DNaseI_Duke	Hsmmtube	Dnase	170760	273378	0.62463	116567	1239.37	43.7263	1.46491	0	0	Null_Model_OpenChrom	human
Roadmapepigenomics_ActiveChromatin	Brain_Anterior_Caudate	7_Enh	118724	273378	0.434285	71581.3	1078.14	43.7261	1.65859	0	0	Null_Model_OpenChrom	human
Roadmapepigenomics_ActiveChromatin	Esophagus	7_Enh	107293	273378	0.392471	62154.6	1032.37	43.7229	1.72623	0	0	Null_Model_OpenChrom	human
SuperEnhancers_Hnisz2013	UCSD_Spleen	SuperEnhancer	38192	273378	0.139704	13985.6	553.673	43.7196	2.7308	0	0	Null_Model_OpenChrom	human
Roadmapepigenomics_Histone_narrow	Pancreatic_Islets	H3K4me1	99806	273378	0.365084	56363.4	993.686	43.7186	1.77076	0	0	Null_Model_OpenChrom	human
SuperEnhancers_Hnisz2013	CD3	SuperEnhancer	20074	273378	0.0734295	5230.89	339.556	43.7133	3.83759	0	0	Null_Model_OpenChrom	human
Roadmapepigenomics_Dnase_narrow	Fetal_Kidney	Dnase	220735	273378	0.807435	169119	1180.96	43.7066	1.3052	0	0	Null_Model_OpenChrom	human
eQTLs_GTEx_Analysis_V6	Adipose_Subcutaneous	none	103686	273378	0.379277	59357.3	1014.38	43.7005	1.74681	0	0	Null_Model_OpenChrom	human
FANTOM5_enhancer_cell	dendritic_cell	Enhancer	21755	273378	0.0795785	6162.79	356.89	43.6892	3.53006	0	0	Null_Model_OpenChrom	human
eQTLs_GTEx_Analysis_V6	Cells_Transformed_fibroblasts	none	109626	273378	0.401005	64405.2	1035.08	43.6884	1.70213	0	0	Null_Model_OpenChrom	human
FANTOM5_enhancer_cell	natural_killer_cell	Enhancer	16835	273378	0.0615814	3910.8	295.85	43.6849	4.30475	0	0	Null_Model_OpenChrom	human
SuperEnhancers_Hnisz2013	BI_CD4p_CD25-_Il17-_PMAstim_Th	SuperEnhancer	30823	273378	0.112749	10297.3	469.885	43.6824	2.99331	0	0	Null_Model_OpenChrom	human
DNaseClusters	H1-hESC	Dnase	185650	273378	0.679096	131731	1234.39	43.6808	1.40931	0	0	Null_Model_OpenChrom	human
Roadmapepigenomics_Histone_narrow	iPS-15b_Cell_Line	H3K4me1	170029	273378	0.621956	117528	1201.93	43.6806	1.44671	0	0	Null_Model_OpenChrom	human
Roadmapepigenomics_Histone_narrow	H9_Cell_Line	H4K91ac	92292	273378	0.337598	51010.7	945.15	43.677	1.80927	0	0	Null_Model_OpenChrom	human
Roadmapepigenomics_ActiveChromatin	Aorta	2_TssAFlnk	21350	273378	0.078097	5801.82	355.997	43.6751	3.67988	0	0	Null_Model_OpenChrom	human
BroadChromHMM	HMEC	StrongEnhancer	84640	273378	0.309608	45257	901.747	43.6741	1.87021	0	0	Null_Model_OpenChrom	human
DNaseClusters	Medullo	Dnase	173395	273378	0.634268	121547	1187.16	43.6735	1.42656	0	0	Null_Model_OpenChrom	human
Roadmapepigenomics_Histone_narrow	H9_Cell_Line	H4K8ac	116044	273378	0.424482	69691.2	1061.47	43.6686	1.66512	0	0	Null_Model_OpenChrom	human
Enhancers_Hnisz2013	CD34_adult	Enhancer	16590	273378	0.0606852	4047.14	287.234	43.6678	4.0992	0	0	Null_Model_OpenChrom	human
Roadmapepigenomics_Histone_narrow	H1_Derived_Mesenchymal_Stem_Cells	H3K4me1	197144	273378	0.721141	144688	1201.36	43.6642	1.36255	0	0	Null_Model_OpenChrom	human
Roadmapepigenomics_Histone_narrow	Penis_Foreskin_Fibroblast_Primary_Cells_skin02	H3K36me3	136031	273378	0.497593	87175.7	1118.94	43.6623	1.56042	0	0	Null_Model_OpenChrom	human
Roadmapepigenomics_ActiveChromatin	Duodenum_Smooth_Muscle	3_TxFlnk	12161	273378	0.0444842	2405.44	223.438	43.6612	5.05563	0	0	Null_Model_OpenChrom	human
FANTOM5_enhancer_organ	blood_expressed_enhancers	Enhancer	16429	273378	0.0600963	3816.04	288.906	43.6576	4.30525	0	0	Null_Model_OpenChrom	human
eQTLs	MRCA	none	96997	273378	0.354809	55597.4	948.373	43.6533	1.74463	0	0	Null_Model_OpenChrom	human
Roadmapepigenomics_Dnase_narrow	Fetal_Brain_Male	Dnase	182459	273378	0.667424	129887	1204.34	43.652	1.40475	0	0	Null_Model_OpenChrom	human
BroadChromHMM	HepG2	StrongEnhancer	52413	273378	0.191724	23430.4	663.963	43.6509	2.23697	0	0	Null_Model_OpenChrom	human
Roadmapepigenomics_Dnase_narrow	Penis_Foreskin_Fibroblast_Primary_Cells_skin01	Dnase	204470	273378	0.747939	153925	1157.99	43.6493	1.32838	0	0	Null_Model_OpenChrom	human
Enhancers_Hnisz2013	HCT-116	Enhancer	58774	273378	0.214992	27431	718.088	43.6478	2.14261	0	0	Null_Model_OpenChrom	human
Misc_Histone	NeutrophilCells	H3K36me3	103447	273378	0.378403	60239.3	989.979	43.6451	1.71727	0	0	Null_Model_OpenChrom	human
eQTLs_GTEx_Analysis_V6	Esophagus_Muscularis	none	90173	273378	0.329847	49705.5	927.205	43.6446	1.81414	0	0	Null_Model_OpenChrom	human
SuperEnhancers_Hnisz2013	BI_CD4p_CD225int_CD127p_Tmem	SuperEnhancer	15154	273378	0.0554324	3502.61	266.969	43.6432	4.32649	0	0	Null_Model_OpenChrom	human
Roadmapepigenomics_Dnase_narrow	Penis_Foreskin_Fibroblast_Primary_Cells_skin02	Dnase	201514	273378	0.737126	149717	1186.84	43.6428	1.34597	0	0	Null_Model_OpenChrom	human
DNaseI_Duke	T-47D	Dnase	177156	273378	0.648026	125221	1190.09	43.6396	1.41475	0	0	Null_Model_OpenChrom	human
Roadmapepigenomics_Dnase_narrow	HSMM_Skeletal_Muscle_Myoblasts	Dnase	199957	273378	0.73143	148392	1181.62	43.6389	1.34749	0	0	Null_Model_OpenChrom	human
Roadmapepigenomics_ActiveChromatin	Fetal_Muscle_Leg	7_Enh	82185	273378	0.300628	44348.5	867.099	43.6357	1.85316	0	0	Null_Model_OpenChrom	human
Roadmapepigenomics_Histone_narrow	4star	H3K4me1	185844	273378	0.679806	134611	1174.16	43.6339	1.3806	0	0	Null_Model_OpenChrom	human
eQTLs_GTEx_Analysis_V6	Esophagus_Mucosa	none	92941	273378	0.339972	53271	909.223	43.6307	1.74468	0	0	Null_Model_OpenChrom	human
SuperEnhancers_Hnisz2013	BI_CD4p_CD25-_CD45ROp_Memory	SuperEnhancer	18940	273378	0.0692814	5038.81	318.743	43.6126	3.75882	0	0	Null_Model_OpenChrom	human
Roadmapepigenomics_Histone_narrow	iPS-20b_Cell_Line	H3K4me1	158211	273378	0.578726	108662	1136.22	43.6087	1.456	0	0	Null_Model_OpenChrom	human
Roadmapepigenomics_Histone_narrow	HUES48_Cell_Line	H3K4me1	162525	273378	0.594507	112655	1143.62	43.6077	1.44268	0	0	Null_Model_OpenChrom	human
Roadmapepigenomics_Dnase_narrow	Fetal_Brain_Female	Dnase	186157	273378	0.680951	135464	1162.74	43.5977	1.37421	0	0	Null_Model_OpenChrom	human
DNaseClusters	FibroP	Dnase	190674	273378	0.697474	140626	1148.04	43.594	1.35589	0	0	Null_Model_OpenChrom	human
BroadChromHMM	HMEC	WeakEnhancer	145474	273378	0.532135	97157.8	1108.32	43.594	1.4973	0	0	Null_Model_OpenChrom	human
Enhancers_Hnisz2013	BI_Adipose_Nuclei	Enhancer	94803	273378	0.346784	53539.3	946.589	43.592	1.77072	0	0	Null_Model_OpenChrom	human
Roadmapepigenomics_Histone_narrow	H9_Cell_Line	H3K56ac	123491	273378	0.451723	77577.2	1053.42	43.5856	1.59185	0	0	Null_Model_OpenChrom	human
Roadmapepigenomics_ActiveChromatin	Brain_Inferior_Temporal_Lobe	7_Enh	109968	273378	0.402256	66050.9	1007.69	43.582	1.6649	0	0	Null_Model_OpenChrom	human
Roadmapepigenomics_ActiveChromatin	Duodenum_Mucosa	3_TxFlnk	13457	273378	0.0492249	2909.98	242.073	43.5696	4.62443	0	0	Null_Model_OpenChrom	human
Roadmapepigenomics_Histone_narrow	H1_Derived_Mesenchymal_Stem_Cells	H3K79me1	113314	273378	0.414496	68445.7	1029.87	43.5668	1.65553	0	0	Null_Model_OpenChrom	human
Roadmapepigenomics_Dnase_narrow	NH-A_Astrocytes	Dnase	193482	273378	0.707745	143685	1143.01	43.5665	1.34657	0	0	Null_Model_OpenChrom	human
Roadmapepigenomics_Dnase_narrow	NHDF-Ad_Adult_Dermal_Fibroblasts	Dnase	199815	273378	0.730911	149847	1147.02	43.5631	1.33346	0	0	Null_Model_OpenChrom	human
eQTLs_GTEx_Analysis_V6	Thyroid	none	112235	273378	0.410549	67125.9	1035.54	43.5607	1.67201	0	0	Null_Model_OpenChrom	human
Roadmapepigenomics_Histone_narrow	H1_Derived_Neuronal_Progenitor_Cultured_Cells	H3K14ac	143031	273378	0.523199	96803.6	1061.24	43.5599	1.47754	0	0	Null_Model_OpenChrom	human
Roadmapepigenomics_Dnase_narrow	HSMMtube_Skeletal_Muscle_Myotubes_Derived_from_HSMM	Dnase	211068	273378	0.772074	162846	1107.13	43.5558	1.29612	0	0	Null_Model_OpenChrom	human
Roadmapepigenomics_Histone_narrow	NHDF-Ad_Adult_Dermal_Fibroblasts	H3K4me1	127739	273378	0.467261	81680	1057.7	43.5465	1.5639	0	0	Null_Model_OpenChrom	human
Enhancers_Hnisz2013	Colon_Crypt_2	Enhancer	72324	273378	0.264557	37867.9	791.339	43.5415	1.9099	0	0	Null_Model_OpenChrom	human
SuperEnhancers_Hnisz2013	BI_CD8_Naive_7pool	SuperEnhancer	12332	273378	0.0451097	2722.23	220.717	43.5388	4.53011	0	0	Null_Model_OpenChrom	human
Roadmapepigenomics_Histone_narrow	hESC_Derived_CD56+_Ectoderm_Cultured_Cells	H3K4me1	173945	273378	0.63628	126560	1088.34	43.5385	1.37441	0	0	Null_Model_OpenChrom	human
Roadmapepigenomics_ActiveChromatin	Breast_Myoepithelial	7_Enh	130331	273378	0.476743	84700.5	1048.3	43.5283	1.53873	0	0	Null_Model_OpenChrom	human
Roadmapepigenomics_Histone_narrow	H1_Derived_Neuronal_Progenitor_Cultured_Cells	H2BK5ac	193599	273378	0.708173	144561	1126.67	43.5246	1.33922	0	0	Null_Model_OpenChrom	human
Roadmapepigenomics_Dnase_narrow	NHLF_Lung_Fibroblasts	Dnase	191456	273378	0.700334	141092	1157.15	43.5242	1.35696	0	0	Null_Model_OpenChrom	human
Roadmapepigenomics_Dnase_narrow	iPS_DF_6.9_Cell_Line	Dnase	218642	273378	0.799779	171022	1094.31	43.5163	1.27845	0	0	Null_Model_OpenChrom	human
Roadmapepigenomics_Histone_narrow	Adipose_Derived_Mesenchymal_Stem_Cell_Cultured_Cells	H3K4me1	186566	273378	0.682447	138576	1102.81	43.5159	1.3463	0	0	Null_Model_OpenChrom	human
Roadmapepigenomics_ActiveChromatin	CD34	6_EnhG	38716	273378	0.141621	15685.3	529.275	43.5137	2.4683	0	0	Null_Model_OpenChrom	human
SuperEnhancers_Hnisz2013	BI_CD34_Primary_RO01536	SuperEnhancer	21423	273378	0.078364	6466.45	343.8	43.5036	3.31294	0	0	Null_Model_OpenChrom	human
eQTLs_GTEx_Analysis_V6	Artery_Tibial	none	99416	273378	0.363658	58456.8	941.616	43.4988	1.70067	0	0	Null_Model_OpenChrom	human
Roadmapepigenomics_Histone_narrow	HUES6_Cell_Line	H3K4me1	176071	273378	0.644057	127787	1110.1	43.4956	1.37785	0	0	Null_Model_OpenChrom	human
Enhancers_Hnisz2013	HeLa	Enhancer	68939	273378	0.252175	35799.9	761.928	43.4938	1.92568	0	0	Null_Model_OpenChrom	human
BroadChromHMM	NHLF	WeakEnhancer	126748	273378	0.463636	81489.5	1040.69	43.4888	1.55539	0	0	Null_Model_OpenChrom	human
Roadmapepigenomics_Histone_narrow	IMR90_Cell_Line	H4K20me1	84432	273378	0.308847	47244.7	855.156	43.4859	1.78712	0	0	Null_Model_OpenChrom	human
Roadmapepigenomics_ActiveChromatin	Fetal_Lung	7_Enh	127112	273378	0.464968	81753.7	1043.1	43.4841	1.55482	0	0	Null_Model_OpenChrom	human
BroadChromHMM	NHEK	WeakEnhancer	127832	273378	0.467602	82974.4	1031.61	43.4832	1.54062	0	0	Null_Model_OpenChrom	human
Roadmapepigenomics_Histone_narrow	H1_Derived_Mesenchymal_Stem_Cells	H2AK5ac	106269	273378	0.388726	65782.5	931.234	43.4762	1.61546	0	0	Null_Model_OpenChrom	human
DNaseClusters	Melano	Dnase	192954	273378	0.705814	145770	1085.36	43.4729	1.32368	0	0	Null_Model_OpenChrom	human
FANTOM5_enhancer_cell	monocyte	Enhancer	26023	273378	0.0951905	8637.6	399.928	43.4714	3.01276	0	0	Null_Model_OpenChrom	human
Enhancers_Hnisz2013	BI_Brain_Anterior_Caudate	Enhancer	79638	273378	0.291311	43902.1	822.386	43.4539	1.81399	0	0	Null_Model_OpenChrom	human
Roadmapepigenomics_ActiveChromatin	CD3_Primary_Peripheral_UW	6_EnhG	35259	273378	0.128975	14236.9	483.847	43.4477	2.47659	0	0	Null_Model_OpenChrom	human
SuperEnhancers_Hnisz2013	BI_CD4p_CD25-_CD45RAp_Naive	SuperEnhancer	18586	273378	0.0679865	5372.23	304.134	43.4472	3.45964	0	0	Null_Model_OpenChrom	human
Roadmapepigenomics_ActiveChromatin	CD3_Primary_Cord_BI	3_TxFlnk	11732	273378	0.0429149	2456.41	213.498	43.4457	4.77608	0	0	Null_Model_OpenChrom	human
SuperEnhancers_Hnisz2013	BI_CD4_Naive_Primary_8pool	SuperEnhancer	14951	273378	0.0546898	3713.49	258.672	43.4431	4.02613	0	0	Null_Model_OpenChrom	human
eQTLs_GTEx_Analysis_V6	Artery_Aorta	none	78363	273378	0.286647	44138.1	787.909	43.4376	1.7754	0	0	Null_Model_OpenChrom	human
Roadmapepigenomics_Histone_narrow	iPS_DF_19.11_Cell_Line	H3K36me3	180164	273378	0.659029	133442	1075.87	43.4274	1.35013	0	0	Null_Model_OpenChrom	human
Roadmapepigenomics_Histone_narrow	HUES64_Cell_Line	H3K4me1	155993	273378	0.570613	110137	1056.07	43.4215	1.41635	0	0	Null_Model_OpenChrom	human
DNaseClusters	pHTE	Dnase	193197	273378	0.706703	145764	1092.87	43.4025	1.32541	0	0	Null_Model_OpenChrom	human
Enhancers_Hnisz2013	BI_Skeletal_Muscle	Enhancer	87962	273378	0.32176	50720.3	858.077	43.4014	1.73426	0	0	Null_Model_OpenChrom	human
Roadmapepigenomics_Dnase_narrow	iPS_DF_19.11_Cell_Line	Dnase	222252	273378	0.812984	176897	1045.28	43.3905	1.25639	0	0	Null_Model_OpenChrom	human
Roadmapepigenomics_Histone_narrow	K562_Leukemia	H3K36me3	71939	273378	0.263148	39621.9	744.871	43.3862	1.81564	0	0	Null_Model_OpenChrom	human
Roadmapepigenomics_ActiveChromatin	Fetal_Intestine_Large	3_TxFlnk	10484	273378	0.0383498	2199.91	190.939	43.3861	4.76564	0	0	Null_Model_OpenChrom	human
SuperEnhancers_Hnisz2013	BI_CD4_Memory_Primary_8pool	SuperEnhancer	12313	273378	0.0450402	2817.97	218.88	43.38	4.36945	0	0	Null_Model_OpenChrom	human
Roadmapepigenomics_ActiveChromatin	4star	7_Enh	130707	273378	0.478118	88300.2	977.803	43.3694	1.48026	0	0	Null_Model_OpenChrom	human
Roadmapepigenomics_Histone_narrow	H1_Derived_Neuronal_Progenitor_Cultured_Cells	H2BK15ac	93767	273378	0.342994	56298.4	864.006	43.3661	1.66554	0	0	Null_Model_OpenChrom	human
DNaseClusters	HSMMtube	Dnase	204723	273378	0.748864	159329	1047	43.356	1.2849	0	0	Null_Model_OpenChrom	human
Roadmapepigenomics_ActiveChromatin	Colonic_Mucosa	3_TxFlnk	9999	273378	0.0365757	2070.68	182.907	43.3461	4.82885	0	0	Null_Model_OpenChrom	human
Roadmapepigenomics_Histone_narrow	H1_Derived_Neuronal_Progenitor_Cultured_Cells	H2BK120ac	100566	273378	0.367864	62118.7	887.132	43.3389	1.61893	0	0	Null_Model_OpenChrom	human
DNaseClusters	LNCaP	Dnase	188337	273378	0.688925	142944	1047.41	43.3383	1.31756	0	0	Null_Model_OpenChrom	human
Enhancers_Hnisz2013	BI_Brain_Cingulate_Gyrus	Enhancer	77688	273378	0.284178	43825	781.718	43.3186	1.77269	0	0	Null_Model_OpenChrom	human
DNaseClusters	HSMM	Dnase	196100	273378	0.717322	149807	1068.73	43.316	1.30902	0	0	Null_Model_OpenChrom	human
Roadmapepigenomics_ActiveChromatin	ES-I3	3_TxFlnk	7793	273378	0.0285063	1422.57	147.069	43.3158	5.47811	0	0	Null_Model_OpenChrom	human
Roadmapepigenomics_ActiveChromatin	CD4+_CD25+_CD127-_Treg_Primary	6_EnhG	24677	273378	0.090267	9038.38	361.196	43.2968	2.73025	0	0	Null_Model_OpenChrom	human
Roadmapepigenomics_Histone_narrow	H9_Cell_Line	H2BK20ac	93942	273378	0.343634	57273.1	847.017	43.2918	1.64025	0	0	Null_Model_OpenChrom	human
eQTLs_GTEx_Analysis_V6	Colon_Transverse	none	58906	273378	0.215475	30069.5	666.259	43.2812	1.95899	0	0	Null_Model_OpenChrom	human
Roadmapepigenomics_Histone_narrow	H1_BMP4_Derived_Mesendoderm_Cultured_Cells	H2AK5ac	47256	273378	0.17286	22411.4	574.159	43.2713	2.10857	0	0	Null_Model_OpenChrom	human
Enhancers_Hnisz2013	Fetal_Intestine_Large	Enhancer	83948	273378	0.307077	50337.2	776.801	43.2681	1.66771	0	0	Null_Model_OpenChrom	human
Enhancers_Hnisz2013	BI_Brain_Hippocampus_Middle_150	Enhancer	83450	273378	0.305255	49257.7	790.246	43.2679	1.69415	0	0	Null_Model_OpenChrom	human
EnhancerFinder_Enhancers	Heart	none	57661	273378	0.21092	29903.7	641.7	43.2559	1.92823	0	0	Null_Model_OpenChrom	human
eQTLs	CD4+T-cells	none	53609	273378	0.196098	26902.6	617.453	43.2525	1.99271	0	0	Null_Model_OpenChrom	human
Roadmapepigenomics_Histone_narrow	H1_Derived_Neuronal_Progenitor_Cultured_Cells	H2AK5ac	104761	273378	0.383209	65827.5	900.305	43.2448	1.59145	0	0	Null_Model_OpenChrom	human
SuperEnhancers_Hnisz2013	BI_CD4_Naive_Primary_7pool	SuperEnhancer	12685	273378	0.046401	3071.55	222.323	43.241	4.12984	0	0	Null_Model_OpenChrom	human
Roadmapepigenomics_ActiveChromatin	4star	3_TxFlnk	6565	273378	0.0240144	1037.87	127.826	43.2394	6.32547	0	0	Null_Model_OpenChrom	human
Enhancers_Hnisz2013	Fetal_Intestine	Enhancer	81569	273378	0.298374	48491.5	765.023	43.2373	1.68213	0	0	Null_Model_OpenChrom	human
Roadmapepigenomics_Histone_narrow	H1_Cell_Line	H2BK12ac	108935	273378	0.398478	70625.4	886.075	43.2352	1.54243	0	0	Null_Model_OpenChrom	human
eQTLs_GTEx_Analysis_V6	Heart_Left_Ventricle	none	61058	273378	0.223346	32592.6	658.392	43.2348	1.87337	0	0	Null_Model_OpenChrom	human
Roadmapepigenomics_Histone_narrow	hESC_Derived_CD56+_Mesoderm_Cultured_Cells	H3K4me1	163017	273378	0.596306	119212	1013.2	43.2347	1.36746	0	0	Null_Model_OpenChrom	human
Enhancers_Hnisz2013	BI_Brain_Inferior_Temporal_Lobe	Enhancer	81553	273378	0.298316	48354.7	768.016	43.226	1.68656	0	0	Null_Model_OpenChrom	human
Roadmapepigenomics_Histone_narrow	Fetal_Thymus	H3K36me3	89521	273378	0.327462	54443.1	811.589	43.2212	1.6443	0	0	Null_Model_OpenChrom	human
Enhancers_Hnisz2013	Colon_Crypt_1	Enhancer	70704	273378	0.258631	39659	718.295	43.2204	1.7828	0	0	Null_Model_OpenChrom	human
eQTLs_GTEx_Analysis_V6	Breast_Mammary_Tissue	none	54934	273378	0.200945	28472.8	612.44	43.2062	1.92935	0	0	Null_Model_OpenChrom	human
Roadmapepigenomics_ActiveChromatin	Fetal_Intestine_Small	6_EnhG	45662	273378	0.167029	22160.2	544.064	43.1967	2.06054	0	0	Null_Model_OpenChrom	human
BroadChromHMM	NHLF	StrongEnhancer	68836	273378	0.251798	38572.3	700.616	43.1959	1.7846	0	0	Null_Model_OpenChrom	human
Roadmapepigenomics_Histone_narrow	H1_Derived_Neuronal_Progenitor_Cultured_Cells	H3K4ac	61472	273378	0.224861	33181.1	654.952	43.1954	1.85262	0	0	Null_Model_OpenChrom	human
eQTLs_GTEx_Analysis_V6	Adipose_Visceral_Omentum	none	57911	273378	0.211835	30353	638.092	43.1882	1.90792	0	0	Null_Model_OpenChrom	human
Roadmapepigenomics_Histone_narrow	IMR90_Cell_Line	H2BK15ac	100877	273378	0.369002	63775.2	859.341	43.1747	1.58176	0	0	Null_Model_OpenChrom	human
Roadmapepigenomics_ActiveChromatin	Brain_Dorsolateral_Prefrontal_Cortex	3_TxFlnk	7944	273378	0.0290587	1550.33	148.096	43.1724	5.12406	0	0	Null_Model_OpenChrom	human
BroadChromHMM	HSMM	WeakEnhancer	127481	273378	0.466318	86767.3	943.065	43.1717	1.46923	0	0	Null_Model_OpenChrom	human
Roadmapepigenomics_ActiveChromatin	Adipose_Derived_Mesenchymal_Stem_Cell	3_TxFlnk	14391	273378	0.0526414	3952.59	241.793	43.1709	3.6409	0	0	Null_Model_OpenChrom	human
eQTLs_GTEx_Analysis_V6	Cells_EBV-transformed_lymphocytes	none	40818	273378	0.14931	19030.1	504.983	43.1458	2.14492	0	0	Null_Model_OpenChrom	human
Roadmapepigenomics_Histone_narrow	iPS_DF_19.11_Cell_Line	H3K4me1	176423	273378	0.645345	134033	982.532	43.1441	1.31627	0	0	Null_Model_OpenChrom	human
SuperEnhancers_Hnisz2013	CD14	SuperEnhancer	34225	273378	0.125193	14332	461.127	43.1399	2.38801	0	0	Null_Model_OpenChrom	human
Roadmapepigenomics_ActiveChromatin	Dnd41_TCell_Leukemia	6_EnhG	27344	273378	0.100023	10784.6	383.874	43.1376	2.53547	0	0	Null_Model_OpenChrom	human
Roadmapepigenomics_ActiveChromatin	CD8_Memory_Primary	3_TxFlnk	6846	273378	0.0250422	1201.63	130.879	43.1266	5.69724	0	0	Null_Model_OpenChrom	human
Roadmapepigenomics_Histone_narrow	HepG2_Hepatocellular_Carcinoma	H4K20me1	36406	273378	0.133171	16294.7	466.362	43.1239	2.23423	0	0	Null_Model_OpenChrom	human
Roadmapepigenomics_ActiveChromatin	CD14_Primary	6_EnhG	23989	273378	0.0877503	8857.67	350.888	43.1229	2.70827	0	0	Null_Model_OpenChrom	human
eQTLs_GTEx_Analysis_V6	Testis	none	89640	273378	0.327898	55380.5	794.483	43.1217	1.61862	0	0	Null_Model_OpenChrom	human
Roadmapepigenomics_Histone_narrow	IMR90_Cell_Line	H2BK12ac	107286	273378	0.392446	69831.9	868.763	43.112	1.53635	0	0	Null_Model_OpenChrom	human
eQTLs	monocytes	none	63819	273378	0.233446	34712.9	675.224	43.1059	1.83848	0	0	Null_Model_OpenChrom	human
SuperEnhancers_Hnisz2013	BI_CD8_Naive_8pool	SuperEnhancer	11818	273378	0.0432295	2996.51	204.727	43.0892	3.94393	0	0	Null_Model_OpenChrom	human
Roadmapepigenomics_ActiveChromatin	CD4+_CD25-_Th_Primary	3_TxFlnk	7708	273378	0.0281954	1464.54	144.896	43.0892	5.26308	0	0	Null_Model_OpenChrom	human
FANTOM5_enhancer_cell	mast_cell	Enhancer	15948	273378	0.0583368	4877.25	256.934	43.0879	3.26987	0	0	Null_Model_OpenChrom	human
Enhancers_Hnisz2013	Colon_Crypt_3	Enhancer	68924	273378	0.25212	39488	683.241	43.0829	1.74544	0	0	Null_Model_OpenChrom	human
Roadmapepigenomics_Histone_narrow	H9_Cell_Line	H3K23ac	73076	273378	0.267308	42707	705.092	43.071	1.7111	0	0	Null_Model_OpenChrom	human
Roadmapepigenomics_ActiveChromatin	CD4_Naive_Primary	3_TxFlnk	7294	273378	0.026681	1372.54	137.624	43.0263	5.31422	0	0	Null_Model_OpenChrom	human
Roadmapepigenomics_ActiveChromatin	Fetal_Brain_Female	3_TxFlnk	10311	273378	0.037717	2457	182.546	43.0249	4.19658	0	0	Null_Model_OpenChrom	human
eQTLs_GTEx_Analysis_V6	Brain_Cerebellum	none	51523	273378	0.188468	27056	568.855	43.0109	1.90431	0	0	Null_Model_OpenChrom	human
Roadmapepigenomics_Histone_narrow	H1_Derived_Neuronal_Progenitor_Cultured_Cells	H3K4me1	149294	273378	0.546108	108847	940.427	43.0091	1.37159	0	0	Null_Model_OpenChrom	human
eQTLs_GTEx_Analysis_V6	Heart_Atrial_Appendage	none	51984	273378	0.190154	27588.9	567.403	42.9943	1.88424	0	0	Null_Model_OpenChrom	human
SuperEnhancers_Hnisz2013	K562	SuperEnhancer	15982	273378	0.0584612	4974.82	256.024	42.9927	3.21258	0	0	Null_Model_OpenChrom	human
BroadChromHMM	H1-hESC	StrongEnhancer	28679	273378	0.104906	11909.6	390.058	42.9921	2.40806	0	0	Null_Model_OpenChrom	human
FANTOM5_enhancer_cell	basophil	Enhancer	16052	273378	0.0587172	4963.74	257.918	42.9914	3.23385	0	0	Null_Model_OpenChrom	human
FANTOM5_enhancer_cell	neutrophil	Enhancer	10856	273378	0.0397106	2758.35	188.612	42.9329	3.93568	0	0	Null_Model_OpenChrom	human
Roadmapepigenomics_Histone_narrow	ES-I3_Cell_Line	H3K4me1	159484	273378	0.583383	121721	880.106	42.9077	1.31025	0	0	Null_Model_OpenChrom	human
Roadmapepigenomics_Histone_narrow	HepG2_Hepatocellular_Carcinoma	H3K27me3	87595	273378	0.320417	55936.2	737.919	42.9029	1.56598	0	0	Null_Model_OpenChrom	human
SuperEnhancers_Hnisz2013	BI_CD34_Primary_RO01480	SuperEnhancer	10072	273378	0.0368428	2527.83	175.886	42.8924	3.98444	0	0	Null_Model_OpenChrom	human
Roadmapepigenomics_ActiveChromatin	Breast_Myoepithelial	3_TxFlnk	11890	273378	0.0434929	3276.92	200.834	42.8865	3.62841	0	0	Null_Model_OpenChrom	human
Roadmapepigenomics_Histone_narrow	H1_Derived_Neuronal_Progenitor_Cultured_Cells	H4K8ac	139115	273378	0.508874	101658	873.411	42.8864	1.36847	0	0	Null_Model_OpenChrom	human
Roadmapepigenomics_Histone_narrow	H1_Cell_Line	H3K23ac	38151	273378	0.139554	18611	455.625	42.8861	2.04992	0	0	Null_Model_OpenChrom	human
Roadmapepigenomics_ActiveChromatin	Brain_Germinal_Matrix	3_TxFlnk	9269	273378	0.0339054	2216.57	164.501	42.8716	4.18169	0	0	Null_Model_OpenChrom	human
Roadmapepigenomics_Histone_narrow	H1_Derived_Neuronal_Progenitor_Cultured_Cells	H4K91ac	120989	273378	0.44257	85745.7	822.137	42.8679	1.41102	0	0	Null_Model_OpenChrom	human
DNaseClusters	Osteobl	Dnase	206215	273378	0.754322	168035	891.02	42.8495	1.22721	0	0	Null_Model_OpenChrom	human
Roadmapepigenomics_Histone_narrow	CD19_Primary_Cells_Peripheral_UW	H3K36me3	87680	273378	0.320728	55764.7	744.999	42.8394	1.57232	0	0	Null_Model_OpenChrom	human
Roadmapepigenomics_ActiveChromatin	Brain_Hippocampus_Middle	3_TxFlnk	7928	273378	0.0290001	1715.55	145.122	42.8086	4.62126	0	0	Null_Model_OpenChrom	human
DNaseClusters	HMEC	Dnase	199942	273378	0.731376	162773	868.581	42.7933	1.22835	0	0	Null_Model_OpenChrom	human
DNaseClusters	Fibrobl	Dnase	212278	273378	0.7765	176627	833.282	42.7839	1.20184	0	0	Null_Model_OpenChrom	human
Roadmapepigenomics_ActiveChromatin	CD4+_CD25-_IL17+_PMA-Ionomcyin_stimulated_Th17_Primary	6_EnhG	21638	273378	0.0791505	8510.27	306.858	42.7811	2.54258	0	0	Null_Model_OpenChrom	human
Roadmapepigenomics_Histone_narrow	H1_Cell_Line	H2AK5ac	77303	273378	0.28277	48577.3	671.839	42.7568	1.59134	0	0	Null_Model_OpenChrom	human
Roadmapepigenomics_Histone_narrow	hESC_Derived_CD184+_Endoderm_Cultured_Cells	H3K4me1	147207	273378	0.538474	109919	872.377	42.7435	1.33924	0	0	Null_Model_OpenChrom	human
Roadmapepigenomics_ActiveChromatin	CD4+_CD25int_CD127+_Tmem_Primary	3_TxFlnk	6011	273378	0.0219879	1194.74	112.722	42.7269	5.03122	0	0	Null_Model_OpenChrom	human
Roadmapepigenomics_ActiveChromatin	Chondrocytes_from_Bone_Marrow_Derived_Mesenchymal_Stem_Cell	3_TxFlnk	11214	273378	0.0410201	3155.97	188.654	42.7134	3.55327	0	0	Null_Model_OpenChrom	human
Roadmapepigenomics_Histone_narrow	Penis_Foreskin_Fibroblast_Primary_Cells_skin01	H3K36me3	107806	273378	0.394348	74808.8	772.634	42.7074	1.44109	0	0	Null_Model_OpenChrom	human
Roadmapepigenomics_ActiveChromatin	Colon_Smooth_Muscle	3_TxFlnk	6983	273378	0.0255434	1482.5	128.799	42.7061	4.71027	0	0	Null_Model_OpenChrom	human
Roadmapepigenomics_Histone_narrow	Fetal_Intestine_Small	H3K36me3	123383	273378	0.451327	89227.3	800.168	42.6857	1.38279	0	0	Null_Model_OpenChrom	human
GeneSets_100000	H1ESC_AllelicExpression	AllelicExpression	186775	273378	0.683212	149358	876.917	42.6693	1.25052	0	0	Null_Model_OpenChrom	human
FANTOM5_enhancer_organ	large_intestine_expressed_enhancers	Enhancer	7484	273378	0.027376	1661.38	136.489	42.66	4.50468	0	0	Null_Model_OpenChrom	human
Roadmapepigenomics_ActiveChromatin	Brain_Inferior_Temporal_Lobe	3_TxFlnk	7302	273378	0.0267103	1611.66	133.484	42.6293	4.53072	0	0	Null_Model_OpenChrom	human
Roadmapepigenomics_ActiveChromatin	CD3_Primary_Cord_BI	6_EnhG	23293	273378	0.0852044	9722.68	318.418	42.6179	2.39574	0	0	Null_Model_OpenChrom	human
Roadmapepigenomics_ActiveChromatin	Brain_Anterior_Caudate	3_TxFlnk	7331	273378	0.0268163	1618.73	134.059	42.6102	4.52886	0	0	Null_Model_OpenChrom	human
Roadmapepigenomics_Histone_narrow	hESC_Derived_CD56+_Mesoderm_Cultured_Cells	H3K36me3	99750	273378	0.364879	68195.5	740.604	42.6065	1.46271	0	0	Null_Model_OpenChrom	human
eQTLs_GTEx_Analysis_V6	Brain_Cerebellar_Hemisphere	none	40556	273378	0.148351	20897.7	461.414	42.6045	1.9407	0	0	Null_Model_OpenChrom	human
Roadmapepigenomics_Histone_narrow	H1_BMP4_Derived_Mesendoderm_Cultured_Cells	H3K4me1	80158	273378	0.293213	51325.7	676.746	42.6043	1.56175	0	0	Null_Model_OpenChrom	human
Enhancers_Hnisz2013	BI_Stomach_Smooth_Muscle	Enhancer	58928	273378	0.215555	34443.7	574.84	42.5932	1.71085	0	0	Null_Model_OpenChrom	human
Roadmapepigenomics_ActiveChromatin	Brain_Germinal_Matrix	7_Enh	83549	273378	0.305617	54276.9	687.285	42.5909	1.53931	0	0	Null_Model_OpenChrom	human
Roadmapepigenomics_ActiveChromatin	Fetal_Muscle_Leg	6_EnhG	29474	273378	0.107814	13650.5	371.524	42.5908	2.15919	0	0	Null_Model_OpenChrom	human
Enhancers_Hnisz2013	VACO_400	Enhancer	49732	273378	0.181917	27655	518.586	42.5715	1.7983	0	0	Null_Model_OpenChrom	human
Roadmapepigenomics_Histone_narrow	H9_Cell_Line	H2AK5ac	33890	273378	0.123968	16883.7	399.637	42.5543	2.00726	0	0	Null_Model_OpenChrom	human
Enhancers_Hnisz2013	HepG2	Enhancer	25944	273378	0.0949016	11319.5	343.695	42.5508	2.29198	0	0	Null_Model_OpenChrom	human
Roadmapepigenomics_Histone_narrow	NHEK-Epidermal_Keratinocytes	H3K36me3	90915	273378	0.332562	61184	698.82	42.5446	1.48593	0	0	Null_Model_OpenChrom	human
eQTLs_GTEx_Analysis_V6	Adrenal_Gland	none	40578	273378	0.148432	21319.2	452.976	42.5162	1.90336	0	0	Null_Model_OpenChrom	human
Roadmapepigenomics_Histone_narrow	H1_BMP4_Derived_Mesendoderm_Cultured_Cells	H2BK15ac	60722	273378	0.222117	36123.2	578.878	42.494	1.68097	0	0	Null_Model_OpenChrom	human
eQTLs_GTEx_Analysis_V6	Colon_Sigmoid	none	39470	273378	0.144379	20124.4	455.375	42.4827	1.9613	0	0	Null_Model_OpenChrom	human
Enhancers_Hnisz2013	VACO_503	Enhancer	26275	273378	0.0961123	11780.1	341.281	42.4721	2.23046	0	0	Null_Model_OpenChrom	human
Roadmapepigenomics_ActiveChromatin	Fetal_Adrenal_Gland	6_EnhG	37445	273378	0.136972	19539.8	421.617	42.4679	1.91634	0	0	Null_Model_OpenChrom	human
Roadmapepigenomics_Histone_narrow	iPS_DF_6.9_Cell_Line	H3K4me1	122160	273378	0.446854	89241	775.192	42.4657	1.36888	0	0	Null_Model_OpenChrom	human
eQTLs_GTEx_Analysis_V6	Esophagus_Gastroesophageal_Junction	none	37823	273378	0.138354	19465.6	432.49	42.4458	1.94307	0	0	Null_Model_OpenChrom	human
Roadmapepigenomics_ActiveChromatin	Bone_Marrow_Derived_Mesenchymal_Stem_Cell	3_TxFlnk	11617	273378	0.0424943	3507.01	191.117	42.4347	3.31251	0	0	Null_Model_OpenChrom	human
Roadmapepigenomics_Histone_narrow	CD4+_CD25-_IL17-_PMA-Ionomycin_stimulated_MACS_purified_Th_Primary_Cells	H3K36me3	73241	273378	0.267911	46756.3	624.242	42.427	1.56644	0	0	Null_Model_OpenChrom	human
Roadmapepigenomics_ActiveChromatin	Brain_Cingulate_Gyrus	3_TxFlnk	6265	273378	0.022917	1337.82	116.153	42.42	4.68301	0	0	Null_Model_OpenChrom	human
Roadmapepigenomics_ActiveChromatin	CD4+_CD25-_Th_Primary	6_EnhG	23947	273378	0.0875967	10424.9	318.822	42.4127	2.29709	0	0	Null_Model_OpenChrom	human
Roadmapepigenomics_ActiveChromatin	CD15_Primary	3_TxFlnk	8101	273378	0.029633	1993.96	143.995	42.4116	4.06277	0	0	Null_Model_OpenChrom	human
Enhancers_Hnisz2013	NHDF-Ad	Enhancer	49666	273378	0.181675	28557.3	497.787	42.4051	1.73917	0	0	Null_Model_OpenChrom	human
Enhancers_Hnisz2013	LnCAP	Enhancer	46330	273378	0.169472	25977.1	480.036	42.3988	1.78349	0	0	Null_Model_OpenChrom	human
FANTOM5_enhancer_organ	blood_vessel_expressed_enhancers	Enhancer	6258	273378	0.0228914	1364.62	115.478	42.3748	4.58589	0	0	Null_Model_OpenChrom	human
Roadmapepigenomics_ActiveChromatin	CD14_Primary	3_TxFlnk	5358	273378	0.0195992	1052.93	101.655	42.3498	5.08864	0	0	Null_Model_OpenChrom	human
eQTLs_GTEx_Analysis_V6	Brain_Cortex	none	33011	273378	0.120752	16658.6	386.526	42.306	1.98162	0	0	Null_Model_OpenChrom	human
Roadmapepigenomics_ActiveChromatin	Fetal_Brain_Female	7_Enh	71663	273378	0.262139	46474.6	595.59	42.2915	1.54198	0	0	Null_Model_OpenChrom	human
Roadmapepigenomics_Histone_narrow	HeLa-S3_Cervical_Carcinoma	H4K20me1	81391	273378	0.297723	54635.6	632.651	42.2909	1.48971	0	0	Null_Model_OpenChrom	human
FANTOM5_enhancer_cell	macrophage	Enhancer	9307	273378	0.0340444	2661.58	157.163	42.2837	3.4968	0	0	Null_Model_OpenChrom	human
Roadmapepigenomics_ActiveChromatin	Esophagus	3_TxFlnk	6810	273378	0.0249106	1632.18	122.463	42.2808	4.17233	0	0	Null_Model_OpenChrom	human
Roadmapepigenomics_Histone_narrow	HSMMtube_Skeletal_Muscle_Myotubes_Derived_from_HSMM	H4K20me1	58599	273378	0.214352	35919.8	536.721	42.2552	1.63139	0	0	Null_Model_OpenChrom	human
Enhancers_Hnisz2013	H2171	Enhancer	62492	273378	0.228592	38804.8	560.648	42.2497	1.61042	0	0	Null_Model_OpenChrom	human
Enhancers_Hnisz2013	HUVEC	Enhancer	63585	273378	0.23259	39261	575.906	42.236	1.61955	0	0	Null_Model_OpenChrom	human
SuperEnhancers_Hnisz2013	DND41	SuperEnhancer	13882	273378	0.0507795	4905.88	212.536	42.2334	2.82967	0	0	Null_Model_OpenChrom	human
SuperEnhancers_Hnisz2013	Colon_Crypt_2	SuperEnhancer	21658	273378	0.0792236	9433.3	289.485	42.2291	2.29591	0	0	Null_Model_OpenChrom	human
Roadmapepigenomics_ActiveChromatin	A549_EtOH_0.02pct_Lung_Carcinoma	7_Enh	93510	273378	0.342054	64912.9	677.392	42.2165	1.44055	0	0	Null_Model_OpenChrom	human
Enhancers_Hnisz2013	UCSD_Right_Ventricle	Enhancer	24588	273378	0.0899414	11161.4	318.047	42.2156	2.20294	0	0	Null_Model_OpenChrom	human
Roadmapepigenomics_ActiveChromatin	CD4+_CD25-_CD45RA+_Naive_Primary	6_EnhG	19523	273378	0.0714139	8215.31	268.002	42.1925	2.37642	0	0	Null_Model_OpenChrom	human
Enhancers_Hnisz2013	Fetal_muscle	Enhancer	77829	273378	0.284694	51826	616.389	42.186	1.50174	0	0	Null_Model_OpenChrom	human
Enhancers_Hnisz2013	CD34_fetal	Enhancer	8119	273378	0.0296988	2130.13	141.968	42.1845	3.8115	0	0	Null_Model_OpenChrom	human
Enhancers_Hnisz2013	UCSD_Adipose_Tissue	Enhancer	5913	273378	0.0216294	1364.19	107.845	42.179	4.33443	0	0	Null_Model_OpenChrom	human
Roadmapepigenomics_Histone_narrow	H1_Cell_Line	H2BK120ac	45797	273378	0.167523	26387.5	460.35	42.1625	1.73556	0	0	Null_Model_OpenChrom	human
Roadmapepigenomics_ActiveChromatin	CD4_Memory_Primary	3_TxFlnk	4418	273378	0.0161608	837.734	84.9656	42.1378	5.27375	0	0	Null_Model_OpenChrom	human
SuperEnhancers_Hnisz2013	BI_CD34_Primary_RO01549	SuperEnhancer	7875	273378	0.0288063	2185.33	135.102	42.114	3.60358	0	0	Null_Model_OpenChrom	human
Roadmapepigenomics_Histone_narrow	NHEK-Epidermal_Keratinocytes	H4K20me1	50135	273378	0.183391	29335.2	493.907	42.1129	1.70904	0	0	Null_Model_OpenChrom	human
EBV_Enhancers	LCLs	none	3026	273378	0.0110689	440.691	61.3915	42.1118	6.86649	0	0	Null_Model_OpenChrom	human
Roadmapepigenomics_Histone_narrow	Penis_Foreskin_Keratinocyte_Primary_Cells_skin03	H3K36me3	90496	273378	0.331029	62605.9	662.359	42.1072	1.44549	0	0	Null_Model_OpenChrom	human
Enhancers_Hnisz2013	UCSD_Right_Atrium	Enhancer	68586	273378	0.250883	44590	570.125	42.0891	1.53815	0	0	Null_Model_OpenChrom	human
EBV_Enhancers	LCLs	SuperEnhancers	3026	273378	0.0110689	439.644	61.466	42.0778	6.88284	0	0	Null_Model_OpenChrom	human
Roadmapepigenomics_Histone_narrow	CD34_Cultured_Cells	H3K36me3	78841	273378	0.288396	53712.7	597.321	42.0683	1.46783	0	0	Null_Model_OpenChrom	human
Roadmapepigenomics_ActiveChromatin	CD34_Primary	6_EnhG	14540	273378	0.0531864	5461.62	215.895	42.0499	2.66222	0	0	Null_Model_OpenChrom	human
Roadmapepigenomics_Histone_narrow	K562_Leukemia	H4K20me1	56533	273378	0.206794	34904.7	514.477	42.0394	1.61964	0	0	Null_Model_OpenChrom	human
Roadmapepigenomics_Histone_narrow	H9_Cell_Line	H3K4me1	85813	273378	0.313899	59537.1	625.067	42.037	1.44134	0	0	Null_Model_OpenChrom	human
eQTLs_GTEx_Analysis_V6	Brain_Frontal_Cortex_BA9	none	26628	273378	0.0974036	12921	326.119	42.0306	2.06083	0	0	Null_Model_OpenChrom	human
Enhancers_Hnisz2013	BI_Brain_Angular_Gyrus	Enhancer	42798	273378	0.156552	24098.9	444.907	42.0291	1.77593	0	0	Null_Model_OpenChrom	human
Roadmapepigenomics_Histone_narrow	A549_EtOH_0.02pct_Lung_Carcinoma	H4K20me1	58401	273378	0.213627	36828.9	513.497	42.0102	1.58574	0	0	Null_Model_OpenChrom	human
SuperEnhancers_Hnisz2013	UCSD_Gastric	SuperEnhancer	28733	273378	0.105104	14328	342.919	42.0069	2.00537	0	0	Null_Model_OpenChrom	human
FANTOM5_enhancer_organ	lung_expressed_enhancers	Enhancer	9568	273378	0.0349992	2924.63	158.154	42.0057	3.27152	0	0	Null_Model_OpenChrom	human
Roadmapepigenomics_Histone_narrow	H9_Derived_Neuronal_Progenitor_Cultured_Cells	H3K36me3	85334	273378	0.312147	58830.2	631.221	41.9882	1.45051	0	0	Null_Model_OpenChrom	human
eQTLs_GTEx_Analysis_V6	Brain_Nucleus_accumbens_basal_ganglia	none	26109	273378	0.0955051	12864.8	315.641	41.9598	2.02949	0	0	Null_Model_OpenChrom	human
AlleleSpecificBinding	GM12878	none	11314	273378	0.0413859	3774.67	179.697	41.9558	2.99735	0	0	Null_Model_OpenChrom	human
Roadmapepigenomics_Histone_narrow	iPS-15b_Cell_Line	H3K36me3	66930	273378	0.244826	43433.5	560.634	41.9105	1.54098	0	0	Null_Model_OpenChrom	human
eQTLs_GTEx_Analysis_V6	Artery_Coronary	none	29859	273378	0.109222	15406.6	344.948	41.8973	1.93806	0	0	Null_Model_OpenChrom	human
Roadmapepigenomics_ActiveChromatin	Brain_Angular_Gyrus	3_TxFlnk	4278	273378	0.0156487	832.361	82.2712	41.8815	5.1396	0	0	Null_Model_OpenChrom	human
FANTOM5_enhancer_cell	reticulocyte	Enhancer	4546	273378	0.016629	942.599	86.0447	41.8783	4.82284	0	0	Null_Model_OpenChrom	human
SuperEnhancers_Hnisz2013	UCSD_Lung	SuperEnhancer	33168	273378	0.121327	17566.4	372.693	41.8618	1.88815	0	0	Null_Model_OpenChrom	human
Enhancers_Hnisz2013	BI_Brain_Mid_Frontal_Lobe	Enhancer	24917	273378	0.0911449	12000.8	308.604	41.8536	2.07628	0	0	Null_Model_OpenChrom	human
FANTOM5_enhancer_cell	granulocyte	Enhancer	11607	273378	0.0424577	4123.74	178.982	41.8102	2.81468	0	0	Null_Model_OpenChrom	human
Roadmapepigenomics_Histone_narrow	Penis_Foreskin_Keratinocyte_Primary_Cells_skin03	H3K27me3	101291	273378	0.370516	73416.4	666.786	41.8045	1.37968	0	0	Null_Model_OpenChrom	human
Roadmapepigenomics_ActiveChromatin	Brain_Substantia_Nigra	3_TxFlnk	4813	273378	0.0176057	1011.1	90.9464	41.8037	4.76016	0	0	Null_Model_OpenChrom	human
Roadmapepigenomics_ActiveChromatin	CD15_Primary	6_EnhG	16925	273378	0.0619106	7219	232.191	41.8018	2.34451	0	0	Null_Model_OpenChrom	human
Roadmapepigenomics_Histone_narrow	Skeletal_Muscle_Male	H3K36me3	67052	273378	0.245272	44243.2	545.986	41.7754	1.51553	0	0	Null_Model_OpenChrom	human
Roadmapepigenomics_Histone_narrow	H1_Cell_Line	H4K20me1	115444	273378	0.422287	87730.6	664.483	41.7068	1.31589	0	0	Null_Model_OpenChrom	human
Roadmapepigenomics_ActiveChromatin	Adipose_Nuclei	3_TxFlnk	6920	273378	0.0253129	1896.12	120.521	41.6848	3.64956	0	0	Null_Model_OpenChrom	human
Enhancers_Hnisz2013	HMEC	Enhancer	59124	273378	0.216272	38418.6	497.567	41.6132	1.53894	0	0	Null_Model_OpenChrom	human
eQTLs_GTEx_Analysis_V6	Brain_Caudate_basal_ganglia	none	29896	273378	0.109358	15840.7	337.806	41.6077	1.88729	0	0	Null_Model_OpenChrom	human
Roadmapepigenomics_ActiveChromatin	Breast_vHMEC	3_TxFlnk	4942	273378	0.0180775	1127.93	91.6897	41.5977	4.38149	0	0	Null_Model_OpenChrom	human
Roadmapepigenomics_ActiveChromatin	Fetal_Intestine_Large	6_EnhG	23359	273378	0.0854458	11652.2	281.633	41.5675	2.00468	0	0	Null_Model_OpenChrom	human
Roadmapepigenomics_Histone_narrow	CD3_Primary_Cells_Peripheral_UWUW	H3K36me3	74677	273378	0.273164	51812.8	550.359	41.5441	1.44128	0	0	Null_Model_OpenChrom	human
Roadmapepigenomics_Histone_narrow	NHDF-Ad_Adult_Dermal_Fibroblasts	H4K20me1	68601	273378	0.250938	47093	519.215	41.424	1.45671	0	0	Null_Model_OpenChrom	human
SuperEnhancers_Hnisz2013	UCSD_Esophagus	SuperEnhancer	27849	273378	0.10187	14701	317.469	41.4149	1.89435	0	0	Null_Model_OpenChrom	human
Roadmapepigenomics_ActiveChromatin	Duodenum_Mucosa	6_EnhG	21469	273378	0.0785323	10556.7	263.685	41.384	2.03369	0	0	Null_Model_OpenChrom	human
Roadmapepigenomics_ActiveChromatin	CD4+_CD25int_CD127+_Tmem_Primary	6_EnhG	11682	273378	0.042732	4345.49	177.415	41.3521	2.6883	0	0	Null_Model_OpenChrom	human
[truncated: 759 more rows]

## Sheet: EBNA2- Loop TF RELI
Track	Cell	Label	Overlap	Total	Ratio	Mean	STD	Z-score	Enrichment	P-val	Corrected P-val	Null_Model	Species
[truncated: 1,544 more rows]

[truncated: 3 more sheets: EBNA2- Loop Non TF RELI, Uninfected Loop TF RELI, Uninfected Loop Non TF RELI]
